# Supplementary material for: Shared evolutionary trajectories of three independent neo-sex chromosomes in Drosophila
Source: HighWire-hosted journal article supplement (doi:10.1101/gr.275503.121), 2021-10-21
Supplement: SupplementalTableS6.xlsx [file SupplementalTableS6.xlsx]

## Sheet: a. D. miranda
Table S6a. Chromosomal location, gene expression level, and functionality of genes in Drosophila miranda
Gene	Scaffold	Chromosome	Strand	Start	End	LF_FPKM1	LM_FPKM	PF_FPKM	PM_FPKM	WF_FPKM	WM_FPKM	O_FPKM	Te_FPKM	Functionality2	Best homolog in Dmel3	Common gene name4
MI1	chr2	chr2	+	46	5663	0.03	0	0	0.13	0.06	0.06	0	0.195	NA
MI2	chr2	chr2	-	1118	1757	0	0.09	0	0.39	0.085	0.7	0.1	0.975	Dis
MI3	chr2	chr2	-	1854	2928	0.745	0.435	0.895	1.025	0.725	1.685	2.04	3.685	Dis
MI4	chr2	chr2	-	9487	10762	0	0	0.035	0.095	0	0.035	0	0.125	NA
MI5	chr2	chr2	+	21286	27666	0	0	0	0	0.01	0	0	0	Sil
MI6	chr2	chr2	+	28056	34453	0	0	0	0.005	0	0	0.01	0	Sil
MI7	chr2	chr2	-	35181	48819	0	0.015	0.065	0.14	0.295	0.015	1.24	0.105	Fun
MI8	chr2	chr2	+	37094	54051	0.025	0	1.075	0.47	0.015	0.02	0	0.035	Dis
MI9	chr2	chr2	-	57638	62035	0	0	0	0	0	0	0.015	0	Sil
MI10	chr2	chr2	+	64616	67473	0	0	0.01	0.03	0.255	0	0.095	0	Sil
MI11	chr2	chr2	+	68276	82780	0.01	0	0.015	0.005	0.02	0	0.02	0	Sil
MI12	chr2	chr2	-	83413	89785	0	0	0	0	0	0	0	0	Sil
MI13	chr2	chr2	-	96511	104827	1.03	0.625	59.79	14.25	0.995	1.51	0.12	3.265	Fun	FBgn0039704	neo
MI14	chr2	chr2	+	106385	107932	0.08	0.03	0.175	0.05	3.59	4.87	0.06	1.055	Fun	FBgn0039703	CG7829
MI15	chr2	chr2	-	107883	130086	548.8	751.09	211.035	178.84	766.64	553.655	148.92	138.055	Fun	FBgn0039747	AdoR
MI16	chr2	chr2	+	133180	135097	0.605	1.65	1.51	0.985	1.665	1.025	0.08	0.02	Fun	FBgn0039748	CG15529
MI17	chr2	chr2	-	133931	140841	0.15	0.16	5.36	2.995	0.125	0.07	0.02	0.08	Fun	FBgn0039749	CG11498
MI18	chr2	chr2	+	143276	147730	0	0	0	0	0	0	0	0	Sil
MI19	chr2	chr2	-	147766	153864	3.09	3.71	23.675	17.78	6.245	5.87	0.01	0.04	Fun	FBgn0051028	CG31028
MI20	chr2	chr2	-	154129	157298	2917.6	4790.07	113.425	13.78	3938.26	3126.32	61.405	5.46	Fun	FBgn0002773	Mlc2
MI21	chr2	chr2	+	155353	157178	0.315	1.005	0.77	0.04	0.73	0.33	0	0	Fun
MI22	chr2	chr2	-	158153	160822	6.37	6.33	8.41	7.49	12.93	10.715	28.13	9.26	Fun	FBgn0039751	CG1983
MI23	chr2	chr2	+	159136	162595	1.11	1.115	5.37	10.865	3.735	4.945	10.04	4.185	Fun	FBgn0025808	Rad17
MI24	chr2	chr2	+	162947	165398	0	0.015	0	17.02	0	126.125	0	226.16	Fun	FBgn0039752	CG15530
MI25	chr2	chr2	+	165809	166704	21.425	19.42	42.87	46.605	27.625	30.87	64.41	40.405	Fun	FBgn0260860	Bet5
MI26	chr2	chr2	-	169870	173007	3.15	3.03	3.695	74.025	14.395	18.71	15.29	1.5	Fun	FBgn0039754	CG9747
MI27	chr2	chr2	-	178741	180330	17.04	20.395	43.715	42.535	81.735	58.76	0.14	1.91	Fun	FBgn0039755	CG15531
MI28	chr2	chr2	-	180443	185943	28.845	32.63	11.755	9.84	69.855	37.85	28.67	7.905	Fun	FBgn0039756	CG9743
MI29	chr2	chr2	-	189717	193301	2174.13	2146.09	2633.35	2197.09	1848.07	591.65	1083.2	208.865	Fun	FBgn0039757	RpS7
MI30	chr2	chr2	+	193167	194802	0	0.525	12.125	3.945	0.48	0.975	0.205	1.45	Fun	FBgn0000279	CecC
MI31	chr2	chr2	+	198545	198982	2.26	1.935	27.915	9.365	7.06	0.84	0	0.395	Fun	FBgn0000279	CecC
MI32	chr2	chr2	-	222596	225340	0	0	1.025	0.105	0	0.09	0	0.085	Fun
MI33	chr2	chr2	-	228118	230853	1.7	1.16	0.745	1.88	8.87	1.885	0.2	0.705	Fun	FBgn0039759	CG9733
MI34	chr2	chr2	+	234009	235939	0	0	0.02	1.665	0	19.015	0	3.265	Fun
MI35	chr2	chr2	+	236394	237781	820.735	783.05	0.39	0.92	0.135	1.14	0	0.845	Fun	FBgn0039760	CG9682
MI36	chr2	chr2	+	237969	239097	2025.21	1237.74	0.195	0.485	119.8	18.54	0	0	Fun	FBgn0039761	CG18404
MI37	chr2	chr2	+	262437	354883	3.745	4.26	54.13	37.665	4.695	2.635	9.945	1.65	Fun	FBgn0010113	hdc
MI38	chr2	chr2	-	263290	264808	0.71	1.865	0.08	0.21	0.05	0.125	0.03	0.145	Dis
MI39	chr2	chr2	-	270481	333650	0	0	0	0	0	0.005	0	0	Sil
MI40	chr2	chr2	-	359765	362211	624.875	488.63	481.88	417.465	688.31	343.655	178.875	146.665	Fun	FBgn0015222	Fer1HCH
MI41	chr2	chr2	+	362247	364777	954.81	811.115	574.155	575.605	874.78	464.165	167.865	147.51	Fun	FBgn0015221	Fer2LCH
MI42	chr2	chr2	+	372348	374703	0	0	0	0	4.355	0.23	6.285	0.02	Fun
MI43	chr2	chr2	-	385408	388619	4.86	4.945	7.95	6.875	24.04	6.69	27.115	6.485	Fun	FBgn0039764	CG15535
MI44	chr2	chr2	+	388729	389481	26.225	24.775	46.015	59.645	68.735	45.835	203.6	85.425	Fun	FBgn0039765	mRpS18C
MI45	chr2	chr2	-	389290	391124	11.37	9.755	27.7	27.6	22.92	13.085	25.725	8.48	Fun	FBgn0039766	CG15536
MI46	chr2	chr2	-	391352	394016	8.15	9.26	20.34	32.175	13.655	20.16	29.275	13.99	Fun	FBgn0039767	CG2218
MI47	chr2	chr2	+	395634	398477	20.415	25.975	0.34	0.225	3.665	1.16	0.105	0.135	Fun	FBgn0039768	CG15533
MI48	chr2	chr2	+	399004	401392	44.94	54.91	0	0	15.175	4.665	0.045	0.055	Fun	FBgn0039769	CG15534
MI49	chr2	chr2	-	401501	409819	0.41	0.525	1.145	1.03	1.275	1.205	0	0	Fun	FBgn0039770	CG15537
MI50	chr2	chr2	-	410230	411319	0	0	0	0	0.085	0	0	0	Sil	FBgn0039771	Osi23
MI51	chr2	chr2	-	411844	419708	27.44	40.68	7.38	4.375	49.52	22.105	16.97	3.525	Fun	FBgn0028646	aralar1
MI52	chr2	chr2	-	421615	424275	7.745	9.095	14.495	18.61	12.81	8.6	21.31	4.625	Fun	FBgn0039773	CG2224
MI53	chr2	chr2	+	425068	430791	10.085	17.78	17.28	20.405	7.995	3.135	0.52	0.41	Fun	FBgn0039774	CDase
MI54	chr2	chr2	+	431682	447320	17.895	21.44	26.53	34.45	27.925	19.89	13.94	6.395	Fun	FBgn0039776	PH4alphaEFB
MI55	chr2	chr2	-	447910	454094	7.165	5.725	0.17	2.815	0.935	0.41	0	0	Fun	FBgn0026190	PH4alphaMP
MI56	chr2	chr2	+	448143	450139	28.68	38.26	0.05	0.185	0.475	0.09	0.52	0.055	Fun	FBgn0039779	PH4alphaSG2
MI57	chr2	chr2	-	454236	457505	0.52	0.885	0.16	2.745	0.195	0.9	0	1.415	Fun	FBgn0039780	PH4alphaNE1
MI58	chr2	chr2	-	458630	463551	12.86	21.67	0.07	2.955	1.965	7.15	0.01	8.02	Fun	FBgn0051014	PH4alphaSG1
MI59	chr2	chr2	+	463607	473480	0.71	0.66	0	0.16	0.395	86.235	0.055	2.07	Fun	FBgn0039782	CG15539
MI60	chr2	chr2	+	468767	469188	0.085	0.345	0	0.06	0.03	29.24	0	0.675	NA	FBgn0051524	CG31524
MI61	chr2	chr2	+	479320	481884	0.05	0.04	1.06	0.035	0	0.525	0.025	0.02	Fun	FBgn0039784	CG9698
MI62	chr2	chr2	-	481984	492229	15.835	17.065	54.185	33.935	23.475	19.975	2.225	2.76	Fun	FBgn0027654	jdp
MI63	chr2	chr2	-	495878	496691	0	0	3.215	1.665	0	0	0	0	Fun
MI64	chr2	chr2	+	499167	549749	30.485	43.93	242.43	342.715	77.845	72.995	9.505	10.75	Fun	FBgn0082582	tmod
MI65	chr2	chr2	-	521970	527208	0.355	0.27	6.08	3.6	1.575	1.27	0	0	Fun
MI66	chr2	chr2	-	543425	549635	0	0	3.935	1.6	0	0.08	0	0	Dis
MI67	chr2	chr2	+	550330	553303	11.64	15.16	1.96	11.885	2.775	1.685	0	0.205	Fun	FBgn0039787	CG9702
MI68	chr2	chr2	-	557698	578693	5.105	5.775	16.92	26.93	14.785	19.775	5.975	8.97	Fun	FBgn0051038	CG31038
MI69	chr2	chr2	-	579339	585583	8.07	10.78	6.74	31.615	20.495	56.56	20.315	52.31	Fun	FBgn0083969	CG34133
MI70	chr2	chr2	+	584730	589499	40.515	25.53	47.49	79.215	49.12	151.75	96.305	314.18	Fun	FBgn0039714	Zip99C
MI71	chr2	chr2	-	589431	591115	2909.33	2861.05	4677.44	3863.05	2445.39	699.08	3931.13	439.02	Fun	FBgn0039713	RpS8
MI72	chr2	chr2	+	591898	596338	4.675	5.24	13.395	23.165	31.595	17.08	124.115	16.12	Fun	FBgn0039712	CG15514
MI73	chr2	chr2	+	599732	601665	0.265	1.57	0.57	9.605	12.675	5.55	45.105	4.69	Fun	FBgn0033921	tej
MI74	chr2	chr2	+	601860	606104	7.85	7.115	12.61	24.05	17.515	14.62	37.44	10.545	Fun	FBgn0039710	dgt1
MI75	chr2	chr2	-	605629	619018	2.62	3.17	13.19	6.885	12.585	2.47	8.155	0.135	Fun	FBgn0039709	Cad99C
MI76	chr2	chr2	-	624635	649941	18.695	19.825	25.065	31.665	30.03	19.645	22.8	18.23	Fun	FBgn0266411	sima
MI77	chr2	chr2	+	689069	692419	2.795	3.4	6.53	16.945	12.165	6.175	85.385	10.595	Fun	FBgn0003479	spn-A
MI78	chr2	chr2	-	692646	694907	11.645	12.89	43.74	62.175	32.06	47.365	48.395	51.575	Fun	FBgn0039743	Jasper
MI79	chr2	chr2	+	696296	699504	18.405	13.57	0.295	1.305	6.99	8.1	1.235	1.675	Fun	FBgn0039742	CG15528
MI80	chr2	chr2	-	698230	701249	2.56	3.185	2.725	4.975	14.8	11.61	19.86	13.535	Fun	FBgn0039741	CG7943
MI81	chr2	chr2	+	701304	702419	1913.77	1847.48	3306.45	2533.26	1665.68	556.135	1125.38	268.435	Dis	FBgn0002626	RpL32
MI82	chr2	chr2	-	701502	703851	9.045	8.645	22.785	29.175	14.355	9.09	36.725	6.975	Fun	FBgn0003512	Sry-delta
MI83	chr2	chr2	-	709424	713350	1.435	1.375	8.625	8.125	4.275	4.83	6.34	3.32	Fun	FBgn0003511	Sry-beta
MI84	chr2	chr2	+	711302	716924	26.645	32.97	42.245	58.88	55.165	201.895	82.67	1810.38	Fun	FBgn0039740	ZIPIC
MI85	chr2	chr2	-	716847	731056	2.54	2.69	11.19	10.72	9.68	6.19	16.475	3.39	Fun	FBgn0026597	Axn
MI86	chr2	chr2	+	731280	738596	2.47	2.705	9.745	12.385	16.97	20.815	11.835	9.74	Fun	FBgn0039738	Mgat2
MI87	chr2	chr2	-	737652	740990	1.095	1.17	3.01	6.085	2.325	3.955	11.3	4.1	Fun	FBgn0003545	sub
MI88	chr2	chr2	+	740117	745081	180.185	221.96	87.46	83.27	285.085	216.66	78.525	188.145	Fun	FBgn0039737	CG7920
MI89	chr2	chr2	-	745035	750063	230.25	212.17	614.325	519.51	527.21	79.865	415.75	67.79	Fun	FBgn0016685	Nlp
MI90	chr2	chr2	+	751109	752134	87.325	91.08	198.915	175.68	409.465	75.23	6410.56	486.93	Fun	FBgn0039735	Nph
MI91	chr2	chr2	-	752156	758005	3.385	3.555	11.995	21.68	7.1	63.03	18.425	71.545	Fun	FBgn0039734	Tace
MI92	chr2	chr2	+	755540	758975	5.025	4.38	12.215	11.11	10.65	5.705	20.82	4.78	Fun	FBgn0039732	CG15525
MI93	chr2	chr2	-	758465	760455	2.05	2.755	7.985	44.295	4.39	37.91	19.535	35.72	Fun	FBgn0039731	Sas-6
MI94	chr2	chr2	+	760494	762291	13.77	12.67	34.915	27.845	23.1	12.75	38.23	5.555	Fun	FBgn0000032	Acph-1
MI95	chr2	chr2	-	764588	771772	5.29	5.145	21.13	13.945	2.26	1.325	0.015	0.03	Fun	FBgn0039728	CG7896
MI96	chr2	chr2	+	783230	799313	0.71	0.505	5.01	4.23	1	1.6	0.15	0.65	Fun	FBgn0004622	TkR99D
MI97	chr2	chr2	-	801181	813637	2.555	3.07	3.21	14.7	4.97	52.755	4.23	49.285	Fun	FBgn0039727	Vps13B
MI98	chr2	chr2	+	813392	816920	15.48	13.615	18.5	19.05	19.81	13.85	23.12	8.495	Fun	FBgn0039726	eIF2Balpha
MI99	chr2	chr2	-	814822	818096	5.32	4.82	11.76	17.795	11.195	23.835	9.89	26.265	Fun	FBgn0260760	CG42558
MI100	chr2	chr2	+	817952	818867	18.75	20.82	31.34	39.88	21.14	49.48	5.25	89.77	Fun	FBgn0085312	CG34283
MI101	chr2	chr2	-	818493	827810	1.16	1.39	4.315	5.915	2.66	2.95	1.64	2.37	Fun	FBgn0000119	arr
MI102	chr2	chr2	+	828839	836168	29.445	32.65	5.08	11.09	6.86	15.345	6.32	12.54	Fun	FBgn0051040	Cog7
MI103	chr2	chr2	-	833138	834903	0.215	0.07	11.11	5.045	1.435	1.3	0	0.025	Fun	FBgn0039723	CG15522
MI104	chr2	chr2	+	837016	841651	25949.9	29003.9	4.56	1.255	1234.39	372.955	0	0.13	Fun	FBgn0003356	Jon99Cii
MI105	chr2	chr2	+	850329	855495	0	0.03	0.02	0.025	35.075	26.03	0	0.03	Fun	FBgn0003861	trp
MI106	chr2	chr2	+	855758	857192	1.505	2.5	9.73	5.225	3.66	4.64	0	0.065	Fun	FBgn0039722	Capa
MI107	chr2	chr2	-	857200	861896	0.075	0.05	0.55	0.46	0.66	1.165	0.015	0.535	Fun	FBgn0051036	CG31036
MI108	chr2	chr2	-	863028	863918	183.725	331.345	9.515	1	65.545	25.07	0	0	Fun	FBgn0039719	CG15515
MI109	chr2	chr2	-	866697	869566	6.08	4.45	1.38	1.115	6.925	4.085	0.535	0.155	Fun	FBgn0039789	CG9717
MI110	chr2	chr2	-	874432	883213	40.165	35.77	50.41	42.895	56.34	23.3	94.77	8.49	Fun	FBgn0039790	CG2246
MI111	chr2	chr2	+	883242	887520	0.195	0.17	1.425	2.73	3.62	72	5.215	4.345	Fun	FBgn0051021	CG31021
MI112	chr2	chr2	+	887758	890396	0	0	0.02	19.975	0.015	65.01	0.255	64.145	Fun	FBgn0051017	PH4alphaNE3
MI113	chr2	chr2	-	890629	892848	0	0	0	7.07	0	20.91	0.03	20.605	Dis	FBgn0051016	CG31016
MI114	chr2	chr2	+	896776	898714	0	0	0	0.02	0	6.125	0	0.245	NA	FBgn0051016	CG31016
MI115	chr2	chr2	-	908032	909508	0	0.235	0	23.595	0	46.48	0	80.235	Fun	FBgn0031021	ND-18
MI116	chr2	chr2	+	909181	910075	0	0.05	0	2.255	0	0.79	0	1.43	Fun	FBgn0030082	HP1b
MI117	chr2	chr2	-	910447	911449	0	0.435	0	31.015	0	21.415	0	24.55	Fun	FBgn0051013	CG31013
MI118	chr2	chr2	+	911341	913461	0	0	0	0.63	0	2.215	0	2.38	Fun	FBgn0051013	CG31013
MI119	chr2	chr2	-	928512	931935	0	0.6	0	63.875	0	107.24	0	164.85	Fun
MI120	chr2	chr2	+	934518	937025	0.01	0	0	6.52	0	35.19	0.015	54.45	Fun	FBgn0051017	PH4alphaNE3
MI121	chr2	chr2	-	938709	939991	0	0	0	0	0	4.245	0.04	0.235	NA	FBgn0051016	CG31016
MI122	chr2	chr2	+	959141	959695	0	0	0	2.16	0	2.55	0	3.67	Dis
MI123	chr2	chr2	-	961364	963558	25.61	27.275	0.045	0.125	0.39	0.96	19.47	0.63	Dis	FBgn0051015	PH4alphaPV
MI124	chr2	chr2	+	963864	964852	0.075	0.09	0	6.58	0	27.12	0	43.33	Fun	FBgn0085462	CG34433
MI125	chr2	chr2	+	1002009	1004278	0.6	0.46	345.85	21.495	53.6	23.24	0	0.845	Fun	FBgn0039795	Spn100A
MI126	chr2	chr2	-	1005550	1008921	0.015	0.03	0	24.87	0.175	126.13	0.43	210.06	Fun	FBgn0000274	Pka-C2
MI127	chr2	chr2	-	1017011	1018749	0.03	0.28	0.07	16.21	0.95	109.785	1.65	217.025	Fun	FBgn0051010	CG31010
MI128	chr2	chr2	+	1026292	1028218	0	0	0	0.62	0	1.935	0	2.155	Dis
MI129	chr2	chr2	+	1040573	1042409	0	0.305	0.02	36.905	0	81.65	0	144.495	Fun	FBgn0039797	eIF4H2
MI130	chr2	chr2	+	1057849	1059127	0	0.06	0	25.53	0	47.045	0	146.005	Fun	FBgn0039799	CG15543
MI131	chr2	chr2	-	1060124	1060691	931.4	934.475	1406.08	1081.43	737.485	463.1	5.84	37.495	Fun	FBgn0039800	Npc2g
MI132	chr2	chr2	+	1086680	1114598	1.41	1.405	11.13	9.615	6.125	2.745	7.695	1.055	Fun	FBgn0004606	zfh1
MI133	chr2	chr2	-	1115559	1135780	4.115	4.84	17.465	13.49	13.47	7.68	15.78	2.37	Fun	FBgn0011739	wts
MI134	chr2	chr2	-	1136496	1165368	0.015	0.815	0.105	11.72	0.06	10.76	0.015	9.265	Fun	FBgn0037082	CG5664
MI135	chr2	chr2	+	1139059	1140018	70.775	81.16	106.945	140.375	108.705	108.875	119.205	116.81	Fun	FBgn0039802	dj-1beta
MI136	chr2	chr2	+	1140395	1166061	11.04	10	20.905	40.505	15.185	23.28	16.47	29.1	Fun	FBgn0027598	cindr
MI137	chr2	chr2	+	1166738	1182032	0.545	0.855	14.145	23.175	0.705	0.62	0	0.2	Fun	FBgn0039804	CG15544
MI138	chr2	chr2	+	1182476	1195668	0.2	0.205	0.285	0.57	0.02	0.01	0	0.015	Sil	FBgn0003720	tll
MI139	chr2	chr2	+	1209818	1211445	9.165	12.39	29.315	442.095	82.045	59.965	0	0	Fun	FBgn0039805	Cpr100A
MI140	chr2	chr2	-	1209911	1211243	0	0	0.29	1.505	0.13	0.035	0	0	Fun
MI141	chr2	chr2	+	1213570	1218516	0.815	1.65	3.88	16.25	6.26	19.37	17.735	17.91	Fun	FBgn0052438	SMC5
MI142	chr2	chr2	-	1218499	1219220	0.19	0.13	5.115	1.18	0.12	0.29	0	0	Dis	FBgn0039806	CG15545
MI143	chr2	chr2	-	1221614	1223405	12.45	11.765	2.145	5.135	13.545	11.195	0	0.665	Fun	FBgn0039807	CG15546
MI144	chr2	chr2	-	1223828	1228840	0.625	0.43	8.165	5.595	2.63	2.32	0.01	0.29	Fun	FBgn0039808	CG12071
MI145	chr2	chr2	-	1229961	1231694	0.615	0.51	0.885	25.61	0.56	45.125	0.56	47	Fun	FBgn0039809	CG15547
MI146	chr2	chr2	-	1231852	1238187	349.23	329.175	208.64	252.3	173.455	205.055	65.455	147.01	Fun	FBgn0000416	Sap-r
MI147	chr2	chr2	+	1242553	1249123	3.35	6.675	0.23	0.07	0.29	1.065	0.055	0.02	Fun	FBgn0015032	Cyp4c3
MI148	chr2	chr2	+	1263370	1283431	3.75	3.455	3.08	2.17	4	1.855	0	0.21	Fun	FBgn0020912	Ptx1
MI149	chr2	chr2	-	1288761	1290162	2.065	1.135	0.175	38.13	0.13	121.205	0	714.83	Fun	FBgn0039810	CG15549
MI150	chr2	chr2	-	1300588	1301423	0	0	0	34.235	0	74.655	0	280.41	Fun	FBgn0261806	CG42752
MI151	chr2	chr2	+	1313259	1317052	0	0.03	0	18.88	0	96.875	0	137.945	Dis	FBgn0039812	CG15548
MI152	chr2	chr2	-	1318026	1319365	0	0	0	5.43	0	4.2	0	2.47	Fun	FBgn0062411	Ctr1C
MI153	chr2	chr2	-	1323608	1376999	1.085	1.12	1.45	1.03	1.66	1.645	0.03	0.1	Fun	FBgn0004573	5-HT7
MI154	chr2	chr2	-	1346982	1348090	0	0	0	1.29	0	2.635	0	3.985	Fun
MI155	chr2	chr2	-	1349275	1350178	0.045	0.195	0	38.05	0	161.37	0.12	491.075	Dis	FBgn0051007	CG31007
MI156	chr2	chr2	+	1354301	1356062	0	0	0	3.29	0	23.55	0	36.655	Fun	FBgn0051897	CG31897
MI157	chr2	chr2	+	1392215	1406777	0.01	0	0	0.04	0	0.1	0	1.105	Fun	FBgn0053773	CG33773
MI158	chr2	chr2	+	1409202	1417669	3.79	6.715	0.92	3.925	7.365	34.365	0.015	58.085	Fun	FBgn0010015	CanA1
MI159	chr2	chr2	+	1418783	1422566	64.03	94.12	0.555	4.59	105.765	122.38	22.635	13.545	Fun	FBgn0016123	Alp4
MI160	chr2	chr2	-	1422454	1423760	75.365	100.955	60.775	115.835	147.83	108.465	151.155	54.875	Fun	FBgn0010808	Chchd3
MI161	chr2	chr2	-	1424936	1433404	13.315	13.27	35.625	29.88	39.19	15.53	55.71	5.84	Fun	FBgn0002413	dco
MI162	chr2	chr2	+	1437949	1439495	0.13	0.055	0.115	0.12	0.05	0.08	0	0.19	Sil	FBgn0024288	Sox100B
MI163	chr2	chr2	-	1446674	1447568	0	0	0	0	0	0.07	0	0.085	Sil	FBgn0053920	CG33920
MI164	chr2	chr2	-	1450073	1451535	0	0.025	0	3.135	0	4.18	0	7.775	Fun
MI165	chr2	chr2	+	1450798	1452329	0.705	0.335	1.31	0.83	0.415	0.655	0	2.6	Dis	FBgn0024288	Sox100B
MI166	chr2	chr2	-	1454881	1456533	0	0	0.21	0.05	0.075	2490.89	0.155	49.685	Fun	FBgn0033115	Spn42De
MI167	chr2	chr2	+	1455212	1458642	0	0	0	0	0	6.03	0	0.055	Fun
MI168	chr2	chr2	-	1456757	1458292	0	0	0.06	0.08	0.025	231.7	0	2.515	Dis	FBgn0033115	Spn42De
MI169	chr2	chr2	-	1464971	1470602	0.255	0.4	6.075	3.16	1.585	1.38	0	0	Fun	FBgn0039816	CG11317
MI170	chr2	chr2	-	1472356	1474748	0.075	0.02	0.02	0.055	0.485	0.385	0	0.065	Sil	FBgn0039817	CG15553
MI171	chr2	chr2	+	1489638	1492429	8.685	4.835	1.85	0.93	3.315	0.89	4.12	0	Dis	FBgn0039818	CG11318
MI172	chr2	chr2	+	1499835	1501122	0.03	0.33	0.07	0.46	0.03	3.325	0	7.48	Fun	FBgn0039820	CG15554
MI173	chr2	chr2	-	1501558	1504364	0.5	0.43	13.895	5.485	2.35	1.595	0.12	0.045	Fun	FBgn0039821	CG15556
MI174	chr2	chr2	+	1508226	1553142	0.105	0.16	0.98	0.55	1.705	1.86	0.01	0.255	Fun	FBgn0013973	Gycbeta100B
MI175	chr2	chr2	-	1531908	1543574	0.705	0.915	2.875	10.875	4.8	13.405	0.2	17.815	Dis	FBgn0086704	stops
MI176	chr2	chr2	-	1554377	1572599	31.23	29.275	9.96	5.24	23.535	8.5	0.42	0.025	Fun	FBgn0051004	mesh
MI177	chr2	chr2	+	1573895	1581106	8.565	9.21	4.6	2.11	7.12	2.615	1.275	0.095	Fun	FBgn0039827	CG1544
MI178	chr2	chr2	-	1581551	1587616	1.915	1.775	10.36	16.685	32.86	28.04	16.545	8.42	Fun	FBgn0267435	chp
MI179	chr2	chr2	+	1590448	1591722	16.8	21.095	28.705	47.01	78.335	18.455	71.615	16.17	Fun	FBgn0039828	CG1542
MI180	chr2	chr2	-	1591599	1592867	4.975	5.995	14.32	13.835	26.665	4.405	35.58	2.5	Fun	FBgn0039829	CG15561
MI181	chr2	chr2	-	1593388	1598104	651.495	912.58	504.28	334.69	3361.05	2470.48	617.825	69.715	Fun	FBgn0039830	ATPsynC
MI182	chr2	chr2	+	1593438	1596403	0.195	0.335	3.41	0.765	0.79	1.09	0.81	0.13	Fun
MI183	chr2	chr2	+	1596970	1608204	18.325	14	25.06	20.93	29.705	11.955	46.155	8.9	Fun	FBgn0039831	CG12054
MI184	chr2	chr2	-	1609162	1613210	4.11	4.045	12.42	20.11	8.57	13.265	11.865	10.98	Fun	FBgn0285911	Vps16A
MI185	chr2	chr2	+	1613140	1615362	21.43	21.095	25.265	32.19	29.795	21.565	35.05	10.775	Fun	FBgn0010803	TrpRS
MI186	chr2	chr2	+	1616067	1618014	9.505	8.965	0.335	1.75	0.325	1.595	0.025	3.59	Fun	FBgn0037672	sage
MI187	chr2	chr2	-	1617904	1619703	309.305	287.385	99.73	125.535	226.445	150.24	152.9	76.44	Fun	FBgn0037671	ATP6AP2
MI188	chr2	chr2	-	1619751	1621814	10.53	8.47	24.1	19.205	19.18	6.61	66.255	5.225	Fun	FBgn0037670	Ibf1
MI189	chr2	chr2	+	1620871	1622812	8.395	6.995	32.64	35.31	12.415	50.495	65.665	229.635	Dis	FBgn0037668	CG16736
MI190	chr2	chr2	-	1622277	1634817	2.685	3.03	12.93	14.58	11.48	11.365	29.25	15.3	Fun	FBgn0037667	CG16734
MI191	chr2	chr2	+	1624591	1626497	7.09	7.97	28.78	60.14	31.25	28.185	402.04	72.185	Fun	FBgn0016034	mael
MI192	chr2	chr2	-	1645120	1648762	3.985	2.835	13.69	9.175	7.76	7.09	19.575	8.06	Fun	FBgn0037664	CG8420
MI193	chr2	chr2	+	1649859	1654893	4.58	4.855	6.19	11.455	5.95	7.645	4.075	4.62	Fun	FBgn0260935	Vps15
MI194	chr2	chr2	+	1655476	1661920	18.13	9.43	45.68	68.205	16.925	19.93	71.055	11.635	Fun	FBgn0015625	CycB3
MI195	chr2	chr2	-	1657759	1660689	51.695	26.55	37.17	23.955	9.52	4.53	0.08	0.07	Fun	FBgn0013949	Elal
MI196	chr2	chr2	-	1661306	1663142	10.52	6.3	4.035	2.05	3.475	1.765	0.025	0.065	Fun	FBgn0039238	CG7016
MI197	chr2	chr2	+	1663670	1664212	0	0.59	60.38	120.045	0	0.085	0	0	Fun	FBgn0039237	CG13640
MI198	chr2	chr2	+	1665869	1666311	0.635	0.28	24.515	32.745	3.945	0	1.09	0.295	Dis	FBgn0265266	CG13639
MI199	chr2	chr2	+	1667532	1672049	0.07	0.09	0.33	3.01	3.43	18.04	5.13	29.055	Fun	FBgn0051119	HDAC11
MI200	chr2	chr2	-	1671582	1676241	9.68	9.845	29.045	31.295	21.97	16.21	40.54	13.045	Fun	FBgn0039234	Nct
MI201	chr2	chr2	-	1676493	1680941	9.185	6.69	7.035	6.415	29.02	18.995	32.125	3.915	Fun	FBgn0067783	DPCoAC
MI202	chr2	chr2	-	1681354	1685385	0.305	1.24	0.82	38.565	7.095	50.135	12.48	46.165	Fun	FBgn0036892	Lon
MI203	chr2	chr2	+	1685015	1687205	4.415	3.935	13.545	17.355	6.3	6.725	25.425	6.535	Fun	FBgn0043457	CG5180
MI204	chr2	chr2	-	1687024	1687665	9.105	10.25	14.57	30.625	26.78	56.91	49.98	103.27	Fun	FBgn0040575	CG15922
MI205	chr2	chr2	+	1687734	1700211	35.81	31.245	62.27	73.4	79.275	63.955	147.395	65.96	Fun	FBgn0038803	CG5191
MI206	chr2	chr2	-	1687961	1690324	8.12	9.3	2.735	10.245	2.945	4.525	3.42	5.825	Fun	FBgn0038804	CG10877
MI207	chr2	chr2	-	1702343	1703774	12.815	13.385	21.755	35.575	34.13	22.86	46.205	11.125	Fun	FBgn0038805	TFAM
MI208	chr2	chr2	-	1704774	1706713	53.34	52.545	102.455	121.2	120.115	92.72	164.695	94.59	Fun	FBgn0023212	EloB
MI209	chr2	chr2	-	1708222	1709397	2.58	2.16	5.63	7.775	9.085	4.665	22.145	5.77	Fun	FBgn0054008	CG34008
MI210	chr2	chr2	-	1709810	1713357	20.795	17.165	28.225	35.72	40.03	28.94	68.09	21.555	Fun	FBgn0038809	CG16953
MI211	chr2	chr2	-	1713431	1715497	38.3	32.43	116.125	112.445	46	28.24	54.715	19.65	Fun	FBgn0014029	44441
MI212	chr2	chr2	+	1715615	1718045	23.16	24.25	31.75	51.495	35.06	22.125	47.015	14.995	Fun	FBgn0038810	Srp72
MI213	chr2	chr2	-	1717970	1720194	4.76	5.75	6.035	18.785	22.565	9.23	55.19	9.31	Fun	FBgn0038811	Pus1
MI214	chr2	chr2	+	1719877	1741189	2.5	3.46	13.135	13.64	8.68	4.935	15.1	2.905	Fun	FBgn0023097	bon
MI215	chr2	chr2	-	1744814	1747057	0	0.09	0.24	0.44	0.18	12.9	0.045	0.845	Dis	FBgn0038069	CG11608
MI216	chr2	chr2	-	1747129	1751746	22.075	18.74	39.34	54.085	35.74	44.7	44.095	62.48	Fun	FBgn0260444	Not10
MI217	chr2	chr2	+	1753162	1757108	179.61	197.05	48.765	68.48	224.8	153.855	88.885	77.255	Fun	FBgn0005671	Vha55
MI218	chr2	chr2	+	1785424	1830914	2.975	4.025	0.82	0.915	4.73	6.145	2.05	3.22	Dis	FBgn0038063	Octbeta2R
MI219	chr2	chr2	-	1852239	1854807	5.545	7.3	1.12	1.365	3.465	3.925	0	0.045	Fun	FBgn0028374	Hug
MI220	chr2	chr2	+	1868425	1871169	1.94	3.72	2.895	1.175	7.43	5.05	0.175	0.46	Fun	FBgn0038674	CG14285
MI221	chr2	chr2	-	1871102	1873792	10.93	13.01	15.545	27.345	28.15	15.465	54.345	16.84	Fun	FBgn0260779	GatA
MI222	chr2	chr2	+	1872263	1872966	136.18	161.835	98.03	110.44	409.865	294.43	166.545	44.72	Fun	FBgn0027785	NP15.6
MI223	chr2	chr2	+	1873799	1875197	19.245	19.08	19.78	28.555	42.675	21.39	68.905	15.08	Fun	FBgn0015781	P5cr
MI224	chr2	chr2	-	1874893	1877045	2.495	2.875	6.075	15.135	3.855	10	6.64	10.415	Fun	FBgn0027784	Prp18
MI225	chr2	chr2	+	1876326	1879589	2.315	2.165	3.72	7.65	5.21	4.79	14.2	3.465	Fun	FBgn0027518	Wdr24
MI226	chr2	chr2	-	1879248	1881403	42.28	41.735	19.365	30.135	40.84	19.095	27.695	3.985	Fun	FBgn0039690	Gnpnat
MI227	chr2	chr2	-	1881485	1882614	22.095	22.65	13.345	26.46	38.95	29.82	26.94	7.175	Fun	FBgn0039689	CIA30
MI228	chr2	chr2	+	1882631	1884369	14.47	13.055	8.265	20.13	27.955	28.13	44.575	25.795	Fun	FBgn0027583	CG7601
MI229	chr2	chr2	-	1883929	1896329	6.93	6.125	14.935	27.01	9.87	62.83	49.745	278.43	Fun	FBgn0039688	Kul
MI230	chr2	chr2	+	1885159	1897210	5.28	4.3	11.5	11.39	9.38	8.69	297.785	17.755	Fun	FBgn0039687	Naa40
MI231	chr2	chr2	-	1897141	1898103	124.68	77.915	141.92	104.015	30.535	28.135	17.545	18.855	Fun	FBgn0024841	Pcd
MI232	chr2	chr2	-	1898836	1902098	0.25	0.2	0.875	1.605	2.235	2.09	0.025	0	Fun	FBgn0039686	CG15506
MI233	chr2	chr2	-	1902756	1903701	0.09	0	0	0.23	0.045	0	0.08	0	Sil-Dis	FBgn0000119	arr
MI234	chr2	chr2	+	1904130	1904794	17382.8	30024.5	17368	16564.2	325.7	810.215	0.28	7.08	Fun	FBgn0039685	Obp99b
MI235	chr2	chr2	-	1904142	1904740	0.695	2.56	81.13	26.265	0.235	0.165	0	0.2	Dis
MI236	chr2	chr2	-	1923461	1924120	0.73	0.96	1.83	1.245	0	0	0	0	Dis	FBgn0039683	dmrt99B
MI237	chr2	chr2	+	1934147	1934834	4275.05	2353.14	6913.61	3770.85	1548.58	1211.12	18.185	266.105	Fun	FBgn0039682	Obp99c
MI238	chr2	chr2	-	1934189	1938165	0.825	0.915	6.59	3.33	4.11	4.575	0	0.025	Fun	FBgn0013972	Gycalpha99B
MI239	chr2	chr2	+	1938467	1940903	2.145	3	5.2	4.37	5.2	2.585	1.295	0.57	Fun	FBgn0039681	CG7582
MI240	chr2	chr2	+	1941257	1945417	5.445	5.8	17.63	19.705	8.635	4.935	21.73	4.425	Fun	FBgn0025457	Bub3
MI241	chr2	chr2	-	1944379	1945065	121.035	326.47	409.435	503.74	0.41	248.76	0.325	780.19	Fun	FBgn0039678	Obp99a
MI242	chr2	chr2	-	1945558	1946599	0.09	0.105	0.425	1.835	0	2.6	0.07	6.045	Fun	FBgn0039677	ppk30
MI243	chr2	chr2	+	1947564	1949573	0	0	0.145	0.035	0	0	0	0.05	Sil	FBgn0039676	ppk20
MI244	chr2	chr2	-	1949702	1953423	0.01	0	0.315	0.12	0.03	0	0.045	0	Sil	FBgn0039675	ppk21
MI245	chr2	chr2	+	1953554	1955565	0.02	0.025	0	0.175	0.04	0.155	0.025	0.17	Sil	FBgn0039676	ppk20
MI246	chr2	chr2	-	1955688	1962113	0.025	0	0.2	0.275	0.01	0.33	0.025	0.53	Sil	FBgn0039675	ppk21
MI247	chr2	chr2	+	1962458	1988301	0.115	0.14	0.465	1.55	0.37	3.265	0	2.665	Fun	FBgn0266137	Dop1R2
MI248	chr2	chr2	-	1976838	1980680	0	0.01	0.01	1.04	0.01	3.525	0	5.06	Fun
MI249	chr2	chr2	-	1998380	2000594	42.91	55.845	41.07	32.63	71.255	55.895	29.84	36.55	Fun	FBgn0039674	CG1907
MI250	chr2	chr2	-	2018463	2028109	19.43	23.035	45.315	46.6	42.14	32.68	61.06	21.665	Fun	FBgn0086361	alph
MI251	chr2	chr2	+	2027684	2030377	4.41	4.74	13.22	29.195	4.98	17.6	8.405	22.22	Fun	FBgn0027784	Prp18
MI252	chr2	chr2	-	2030073	2031341	2.725	5.045	19.06	12.105	4.415	4.235	0	2.065	Fun	FBgn0015781	P5cr
MI253	chr2	chr2	-	2031916	2034486	1.605	2.04	1.815	3.54	3.67	3.135	1.72	2.505	Dis	FBgn0000119	arr
MI254	chr2	chr2	+	2034750	2035582	18.455	37.56	0	0.115	0	0.825	0	1.04	Fun	FBgn0051041	CG31041
MI255	chr2	chr2	+	2035924	2036728	575.565	396.79	0.065	0.06	0	0	0	0	Fun	FBgn0039671	CG11470
MI256	chr2	chr2	+	2037664	2038495	428.815	267.8	0.06	0.16	0	0	0	0	Fun	FBgn0039670	CG7567
MI257	chr2	chr2	-	2061870	2071863	4.765	5.31	22.895	15.425	4.31	2.045	0	0.055	Fun	FBgn0000492	Dr
MI258	chr2	chr2	-	2113436	2114484	0.075	1.595	0.225	79.405	0.075	59.84	0	133.44	Fun	FBgn0039669	ND-20L
MI259	chr2	chr2	+	2124152	2132567	11.145	10.85	16.63	44	18.555	90.905	35.54	82.61	Fun	FBgn0039668	Trc8
MI260	chr2	chr2	-	2132195	2135079	6.91	10.41	1.86	1.39	24.89	23.145	0.9	2.965	Fun	FBgn0039667	FipoQ
MI261	chr2	chr2	+	2137420	2139108	12.855	10.78	60.875	59.255	11.34	17.565	18.285	18.855	Fun	FBgn0039665	CG2310
MI262	chr2	chr2	+	2139872	2140575	95.585	100.745	127.54	125.325	93.93	204.085	190.675	271.985	Fun	FBgn0040623	Spase12
MI263	chr2	chr2	-	2139943	2141545	5.96	5.9	8.91	11.63	9.24	6.38	21.505	3.87	Fun	FBgn0039664	CG2006
MI264	chr2	chr2	+	2141596	2144016	0.55	0.75	1.985	2.835	2.145	1.195	5.42	1.15	Fun	FBgn0039663	CG2321
MI265	chr2	chr2	-	2143744	2152324	2.945	3.465	17.695	33.44	11.06	31.685	11.37	27.155	Dis	FBgn0004369	Ptp99A
MI266	chr2	chr2	+	2254155	2255557	0	0	0	0.75	0	2.595	0	3.61	Fun
MI267	chr2	chr2	+	2286849	2288148	0	0	0.03	0.055	0	11.11	0	167.605	Fun
MI268	chr2	chr2	-	2296359	2304893	0	0	0	0.42	0.8	0.405	0.875	0.97	Fun
MI269	chr2	chr2	+	2327554	2329337	0	0.025	0.025	0.045	0	0.075	0	0.13	Sil	FBgn0038733	CG11407
MI270	chr2	chr2	+	2329401	2335062	24.915	31.16	104.955	121.055	66.68	115.56	52.295	68.04	Fun	FBgn0015622	Cnx99A
MI271	chr2	chr2	-	2384088	2406193	0	0	0.025	0	0	0	0	0	Sil
MI272	chr2	chr2	+	2407538	2411656	6.945	6.21	90.625	33.55	9.035	0.095	54.53	0.09	Fun	FBgn0003525	stg
MI273	chr2	chr2	-	2412116	2413113	0	0.09	0.225	0.075	0.115	0.045	0	0	Sil
MI274	chr2	chr2	+	2414243	2420319	21.25	18.82	176.89	111.57	25.86	55.44	4.585	29.96	Fun	FBgn0263236	SP1029
MI275	chr2	chr2	+	2420496	2425735	0	0	0.045	0.02	0	9.29	0	2.41	Dis	FBgn0051445	CG31445
MI276	chr2	chr2	-	2423878	2430802	4.715	4.53	8	15.32	10.29	36.365	24.05	33.1	Fun	FBgn0028476	Usp1
MI277	chr2	chr2	+	2430621	2433419	795.72	814.185	908.32	802.09	714.98	231.625	429.675	108.99	Fun	FBgn0029176	eEF1gamma
MI278	chr2	chr2	-	2433417	2434750	85.655	107.07	72.53	65.735	182.545	90.22	374.29	44.185	Fun	FBgn0062442	Cisd2
MI279	chr2	chr2	+	2434251	2437662	3.35	3.86	11.635	28.075	7.225	14.97	13.87	10.595	Fun	FBgn0039654	Brd8
MI280	chr2	chr2	+	2455220	2456603	0	4.29	0.36	41.14	0.025	12.665	0.07	18.175	Dis	FBgn0039651	Cyt-c1L
MI281	chr2	chr2	+	2457093	2458347	7.945	7.16	8.49	12.21	10.355	7.245	8.95	3.475	Fun	FBgn0039650	Mesh1
MI282	chr2	chr2	-	2458324	2460007	26.18	18.515	181.19	128.57	73.15	22.06	61.63	3.86	Fun	FBgn0014427	CG11899
MI283	chr2	chr2	+	2465163	2487164	0.385	0.555	7.375	4.47	8.045	8.115	0.03	0.045	Fun	FBgn0039647	jus
MI284	chr2	chr2	-	2486489	2491971	2.725	2.51	0.01	0.01	2.845	0.67	0	0	Fun	FBgn0039645	CG11898
MI285	chr2	chr2	-	2492526	2503688	1.835	1.555	3.485	3.665	45.84	2.67	61.705	0.455	Fun	FBgn0039644	rdog
MI286	chr2	chr2	-	2509259	2513923	0.125	0.175	1.665	0.97	2.065	1.74	0.05	0.035	Fun
MI287	chr2	chr2	+	2547004	2557402	31.555	34.775	35.075	64.54	56.195	107.855	35.32	74.565	Fun	FBgn0039213	atl
MI288	chr2	chr2	-	2549033	2554265	3.86	3.92	9.835	10.335	4.005	2.655	1.77	2.41	Fun	FBgn0046685	Wsck
MI289	chr2	chr2	-	2557370	2573882	2.055	2.73	7.235	19.935	5.25	24.36	6.23	146.3	Fun	FBgn0039214	puf
MI290	chr2	chr2	+	2573690	2577808	21.855	24.51	44.58	54.155	19.835	18.36	12.83	8.02	Fun	FBgn0000139	ash2
MI291	chr2	chr2	-	2576724	2580205	0.79	1.63	5.135	8.345	0.41	4.17	0.275	4.11	Fun	FBgn0051125	CG31125
MI292	chr2	chr2	+	2580139	2585253	5.035	5.02	8.955	15.585	13.355	14.275	16.345	12.775	Dis	FBgn0039215	CG6695
MI293	chr2	chr2	-	2585179	2586831	15.74	16.64	15.965	76.005	16.815	80.225	9.26	88.645	Fun	FBgn0020018	Ppox
MI294	chr2	chr2	+	2591039	2640516	3.77	3.225	1.185	0.315	11.475	9.195	0.165	0.515	Fun	FBgn0003429	slo
MI295	chr2	chr2	-	2597170	2597926	0.12	0.115	6.03	14.9	0.08	8.02	0.33	12.29	Fun	FBgn0039505	CG5934
MI296	chr2	chr2	+	2641373	2646135	0.19	0.07	3.01	0.63	0.025	0.015	0	0	Fun	FBgn0039217	CG13627
MI297	chr2	chr2	+	2646574	2647052	49.26	48.61	147.765	125.88	116.425	99.255	199.185	259.41	Fun	FBgn0039218	Rpb10
MI298	chr2	chr2	-	2646741	2648454	15.65	19.14	33.48	80.385	32.715	121.775	28.235	174.08	Fun	FBgn0039219	CG13630
MI299	chr2	chr2	+	2649778	2677673	10.025	8.415	13.975	8.655	8.85	4.5	0.91	1.5	Fun	FBgn0004885	tok
MI300	chr2	chr2	+	2682996	2689895	1.85	2.255	8.835	24.17	11.33	9.7	27.585	5.765	Fun	FBgn0000140	asp
MI301	chr2	chr2	-	2689586	2694851	6.95	6.035	2.865	4.045	5.63	8.395	0.05	8.1	Fun	FBgn0015591	AstA
MI302	chr2	chr2	+	2699786	2701774	15.65	16.14	5.365	10.48	42.63	39.575	13.795	2.69	Fun	FBgn0040600	CG13631
MI303	chr2	chr2	-	2716490	2719446	6.675	7.9	10.485	15.26	18.48	12.56	16.72	6.795	Fun	FBgn0039223	CG5805
MI304	chr2	chr2	-	2720986	2722926	0	0	0.74	0.3	0.04	0.065	0	0	Sil	FBgn0039224	CG13634
MI305	chr2	chr2	-	2730271	2747632	6.82	8.9	12.83	25.78	13.035	27.605	36.04	30.21	Fun	FBgn0039227	polybromo
MI306	chr2	chr2	+	2741083	2742170	0.4	0.315	1.195	72.24	0	58.5	0.355	54.375	Fun	FBgn0039228	CG6980
MI307	chr2	chr2	+	2748272	2750076	2.585	2.755	2.365	10.545	12.61	35.845	21.81	153.365	Fun	FBgn0083986	CG34150
MI308	chr2	chr2	-	2749185	2751282	6.795	7.87	18.96	32.19	17.785	9.71	32.4	7.595	Fun	FBgn0027617	CG5808
MI309	chr2	chr2	+	2751874	2757082	9.415	10.78	30.715	40.325	25.46	22.885	22.525	9.095	Fun	FBgn0039229	Saf-B
MI310	chr2	chr2	-	2760674	2764093	11.16	7.665	24.705	23.135	12.03	8.085	11.195	3.27	Fun	FBgn0051357	Kaz
MI311	chr2	chr2	-	2764516	2766680	36.51	42.465	16.315	15.395	8.765	2.555	0.02	0.095	Fun	FBgn0039611	Nepl18
MI312	chr2	chr2	-	2767061	2769403	1.575	3.44	0.545	0.87	0.12	0.27	0.02	0.39	Fun	FBgn0039609	Nepl17
MI313	chr2	chr2	+	2770411	2773034	658.215	672.655	979.855	894.89	596.965	202.57	494.04	63.775	Fun	FBgn0002622	RpS3
MI314	chr2	chr2	-	2770476	2771710	0.04	0	10.83	2.08	0.295	0.095	0.505	0.155	Fun
MI315	chr2	chr2	-	2773418	2775756	24.7	14.535	2.56	1.02	16.795	2.52	14.65	0.09	Dis	FBgn0039073	CG4408
MI316	chr2	chr2	-	2776452	2778202	0	0.015	0.025	12.04	0	34.175	0	54.925	Dis	FBgn0261998	CG42816
MI317	chr2	chr2	+	2794219	2795334	0	0	0	0.04	0	2.82	0	18.735	Fun	FBgn0262009	CG42827
MI318	chr2	chr2	+	2797719	2798384	0	0	0	0	0	14.63	0	388.125	Dis	FBgn0262009	CG42827
MI319	chr2	chr2	+	2799305	2799940	0	0	0	0	0	21.63	0	277.17	Fun	FBgn0262009	CG42827
MI320	chr2	chr2	+	2801075	2811370	0	0.015	0.05	8.01	0	14.69	0	80.515	Dis	FBgn0261998	CG42816
MI321	chr2	chr2	+	2812135	2812558	0	0	0	0	0	34.28	0	433.7	Fun	FBgn0262009	CG42827
MI322	chr2	chr2	+	2813051	2813576	0	0	0.135	0	0	5.255	0	125.505	Fun	FBgn0262009	CG42827
MI323	chr2	chr2	+	2815396	2815832	0	0	0	0	0	17.115	0	268.68	Fun	FBgn0262009	CG42827
MI324	chr2	chr2	+	2816120	2817255	0	0	0	0	0	23.945	0	3.355	Fun	FBgn0262010	CG42828
MI325	chr2	chr2	-	2819141	2828803	0.575	0.535	10.675	5.26	1.095	1.09	0.2	0.68	Fun	FBgn0039075	CG4393
MI326	chr2	chr2	-	2831044	2831678	0	0	0	0.065	0	4.915	0	0.6	Dis
MI327	chr2	chr2	-	2832017	2838149	0	0	0	0	0	0.04	0	0.145	Sil	FBgn0051515	CG31515
MI328	chr2	chr2	+	2845846	2846893	0	0	0.195	0.08	0	146.99	0	336.775	Fun	FBgn0051296	CG31296
MI329	chr2	chr2	-	2852417	2860149	0.395	0.28	0.35	0.58	0.485	0.59	0	0.435	Sil	FBgn0039078	CG4374
MI330	chr2	chr2	+	2898670	2922574	0	0	0	0	0	0	0	0.01	Sil
MI331	chr2	chr2	-	2924992	2926571	0	0	0	0	0	14.79	0	0.565	Dis	FBgn0051265	CG31265
MI332	chr2	chr2	+	2929380	2937702	0	0	0	0	0	0	0	0	Sil	FBgn0039080	Ir94h
MI333	chr2	chr2	+	2938180	2943277	0	0	0	0.01	0	0	0	0	Sil
MI334	chr2	chr2	-	2957233	2958131	0	0	0	7.37	0	17.98	0	31.355	Fun	FBgn0085318	CG34289
MI335	chr2	chr2	-	2966368	2971168	15.86	26.23	3.025	14.27	17.03	59.475	0	64.755	Fun	FBgn0039081	Irk2
MI336	chr2	chr2	-	2974155	2983561	0.195	0.355	0.3	1.05	5.17	3.575	0.43	0.165	Fun	FBgn0039084	CG10175
MI337	chr2	chr2	-	2986075	2987788	2.2	2.46	0	0.145	1.15	1.02	0	0	Fun	FBgn0039087	Ugt303B2
MI338	chr2	chr2	-	3006286	3008491	0	0.145	0	17.015	0	124.26	0	230.02	Dis
MI339	chr2	chr2	+	3016762	3029781	0.175	0.16	4.3	2.005	1.005	1.055	0	0.015	Fun	FBgn0039089	beat-IV
MI340	chr2	chr2	-	3038805	3044046	14.295	2.66	0.015	0.015	15.235	9.82	0.05	0.145	Fun	FBgn0039092	CG16723
MI341	chr2	chr2	-	3048514	3049362	0	0	0.06	0	7.565	5.28	0.065	0	Fun
MI342	chr2	chr2	-	3052630	3055675	2.98	4.26	1.36	1.84	14.02	4.615	4.75	0.24	Fun	FBgn0039094	CG10184
MI343	chr2	chr2	-	3055909	3130531	8.06	5.715	7.07	4.825	33.705	33.795	8.625	1.06	Dis	FBgn0051145	CG31145
MI344	chr2	chr2	+	3102865	3109323	1.075	1.595	0	24.03	0.305	30.12	0.2	27.35	Dis	FBgn0000405	CycB
MI345	chr2	chr2	-	3137395	3138889	0	0	0.09	0.08	0.08	0	0	0.52	Sil	FBgn0035012	CG13590
MI346	chr2	chr2	+	3139554	3140517	2.885	5.365	8.4	2.985	8.6	2.835	27.58	5.155	Fun	FBgn0039098	GILT3
MI347	chr2	chr2	+	3141189	3142342	9.845	5.89	21.545	40.23	2.845	126.93	1.255	383.215	Fun	FBgn0039099	GILT2
MI348	chr2	chr2	+	3142697	3144947	74.355	77.23	88.19	100.7	152.31	41.105	99.85	14.07	Fun	FBgn0040227	eIF3d1
MI349	chr2	chr2	-	3143792	3144069	0	0	3.295	0	0	0	0	0.5	Fun
MI350	chr2	chr2	+	3145018	3148634	82.43	42.835	229.035	160.76	59.325	13.675	0.29	4.145	Fun	FBgn0039102	SPE
MI351	chr2	chr2	-	3148098	3157928	2.54	3.77	8.15	50.68	60.625	99.815	78.975	78.84	Fun	FBgn0027512	CG10254
MI352	chr2	chr2	-	3167037	3168173	0	1.545	0.05	214.365	0	835.01	0	2147.01	Fun	FBgn0039104	CG10252
MI353	chr2	chr2	+	3167386	3169266	0	0.065	0	24.505	0	24.325	0	27.425	Fun	FBgn0029094	asf1
MI354	chr2	chr2	+	3172567	3175527	41.36	60.515	0	1.03	24.265	8.595	0.035	3.155	Fun	FBgn0051148	Gba1a
MI355	chr2	chr2	-	3172892	3175463	0.03	0.075	0.16	4.155	0.755	16.165	0.745	121.02	Fun
MI356	chr2	chr2	+	3175778	3181439	46.41	38.935	1.91	3.695	28.07	19.125	3.99	3.85	Fun	FBgn0051414	Gba1b
MI357	chr2	chr2	-	3182769	3188824	0.695	0.865	0.525	0.57	1.54	2.18	0	0.655	Fun	FBgn0002922	nau
MI358	chr2	chr2	+	3191355	3192528	0	0	0	0.07	0	0	0	0.05	Sil
MI359	chr2	chr2	+	3194621	3203441	33.885	30.93	39.46	66.755	43.545	221.78	18.255	619.35	Fun	FBgn0039109	CG10365
MI360	chr2	chr2	-	3200694	3202204	0.905	1.525	3.85	2.655	0.54	0.49	28.39	0.715	Dis
MI361	chr2	chr2	-	3203319	3204918	100.31	84.46	94.975	152.13	71.775	82.32	180.425	75.52	Fun	FBgn0028691	Rpn9
MI362	chr2	chr2	+	3205029	3206430	8.43	7.945	19.855	36.27	10.75	26.215	29.25	42.68	Fun	FBgn0027526	Ublcp1
MI363	chr2	chr2	-	3206320	3211366	0.19	0.53	0.06	1.975	8.085	6.75	0.32	2.35	Fun	FBgn0039048	CG17111
MI364	chr2	chr2	-	3216197	3256201	1.42	1.575	25.85	14.625	15.835	13.465	0.02	0.01	Fun	FBgn0039054	Cow
MI365	chr2	chr2	+	3238551	3240719	83.725	99.93	42.095	19.295	106.325	63.625	21.04	3.35	Fun	FBgn0039049	CG6726
MI366	chr2	chr2	+	3240897	3244169	97.63	79.04	3.19	1.675	34.96	21.545	1.77	0.365	Fun	FBgn0039049	CG6726
MI367	chr2	chr2	-	3257618	3262379	2.25	2.59	16.53	19.705	16.26	10.62	19.035	5.825	Fun	FBgn0039055	Rassf
MI368	chr2	chr2	+	3262624	3268255	4.775	5.295	8.88	11.1	13.43	5.16	28.125	2.88	Fun	FBgn0039056	CenB1A
MI369	chr2	chr2	-	3267762	3270753	1.3	1.85	4.7	20.52	3.24	14.73	12.395	10.095	Fun	FBgn0051365	CG31365
MI370	chr2	chr2	-	3270869	3272549	1.08	2.135	8.48	20.61	2.93	12.045	28.625	14.53	Fun	FBgn0051457	CG31457
MI371	chr2	chr2	+	3272310	3276376	73.495	79.42	80.765	126.54	56.74	77.875	57.85	45.44	Fun	FBgn0028692	Rpn2
MI372	chr2	chr2	-	3275420	3276302	0.28	0.3	2.38	2.02	0.74	1.47	0.435	0.055	Fun
MI373	chr2	chr2	+	3277489	3281575	13.86	10.59	21.83	17.31	5.505	4.115	0	1.07	Fun	FBgn0037697	GstZ2
MI374	chr2	chr2	+	3281635	3282931	7.8	5.045	13.415	6.005	16.94	5.045	5.525	0.575	Fun	FBgn0037696	GstZ1
MI375	chr2	chr2	-	3282931	3305523	18.16	22.795	16.745	13.475	48.755	44.55	4.79	13.11	Fun	FBgn0261552	ps
MI376	chr2	chr2	-	3325437	3329595	8.12	9.26	25.655	54.97	9.59	67.245	15.16	53.445	Fun	FBgn0011740	alpha-Man-IIa
MI377	chr2	chr2	+	3329663	3339116	0.935	1.945	16.015	315.58	3.65	1106.94	1.975	1072.9	Fun	FBgn0003889	betaTub85D
MI378	chr2	chr2	-	3339410	3342363	5.97	7.24	14.695	24.3	12.545	17.265	17.12	10.945	Fun	FBgn0037689	CG8135
MI379	chr2	chr2	+	3342713	3344274	6.87	7.26	11.67	28.3	7.945	85.1	13.095	121.385	Fun	FBgn0037688	CG9356
MI380	chr2	chr2	-	3344204	3345278	22.475	21.77	20.19	23.985	43.58	26.555	21.17	16.985	Fun	FBgn0037687	CG8132
MI381	chr2	chr2	+	3345497	3347128	1773.56	1682.87	2080.76	1651.65	1127.3	333.385	684.97	115.715	Fun	FBgn0037686	RpL34b
MI382	chr2	chr2	-	3345911	3352323	0.025	0.025	0.265	0.76	1.12	2.295	1.275	3.165	Fun	FBgn0037685	Or85f
MI383	chr2	chr2	+	3351493	3352290	0	0.055	0	8.725	0	54.565	0	209.665	Fun	FBgn0033168	CG11145
MI384	chr2	chr2	+	3352700	3382620	5.6	6.25	11.565	9.2	7.89	6.24	1.15	0.98	Fun	FBgn0000723	FER
MI385	chr2	chr2	-	3382424	3385208	66.165	84.275	1.455	0.755	32.87	33.545	0.205	1.68	Fun	FBgn0037684	Srr
MI386	chr2	chr2	-	3385609	3387209	62.525	73.975	192.255	188.89	117.77	191.93	107.215	159.395	Fun	FBgn0037683	CG18473
MI387	chr2	chr2	-	3411933	3415022	8.38	8.635	53.67	38.29	15.65	10.43	35.835	11.87	Fun	FBgn0037680	pasi2
MI388	chr2	chr2	-	3416621	3418197	12.825	14.53	20.1	32.6	81.13	23.575	177.775	23.22	Fun	FBgn0038989	CG6937
MI389	chr2	chr2	+	3418590	3420505	3.605	2.385	8.11	5.515	5.16	2.865	3.625	3.265	Fun	FBgn0053107	CG33107
MI390	chr2	chr2	+	3420711	3422157	11.265	12.3	21.55	31.02	105.45	13.8	207.1	14.125	Fun	FBgn0024558	Dph5
MI391	chr2	chr2	-	3422125	3440006	6.77	8.27	11.685	20.25	16.99	44.945	17.39	26.315	Fun	FBgn0053110	CG33110
MI392	chr2	chr2	+	3442617	3446402	1.82	3.795	0.15	0.04	0.225	1.24	2.96	0.05	Fun	FBgn0038986	sit
MI393	chr2	chr2	-	3448865	3452495	7.49	8.185	2.365	33.46	15.4	74.38	7.94	21.17	Fun	FBgn0260942	bond
MI394	chr2	chr2	+	3457022	3461441	41.34	39.57	65.925	76.94	102.78	122.445	89.875	149.56	Fun	FBgn0038984	AdipoR
MI395	chr2	chr2	+	3470010	3472824	0.825	1.95	1.875	17.825	40.705	7.58	4.055	0.685	Fun	FBgn0038983	CG5326
MI396	chr2	chr2	+	3472970	3474398	11.19	9.08	16.37	7.79	33.845	18.07	0.205	4.4	Fun	FBgn0053099	CG33099
MI397	chr2	chr2	+	3476748	3484334	16.93	17.235	28.9	33.045	23.26	13.84	5.59	4.59	Fun	FBgn0038981	CG5346
MI398	chr2	chr2	-	3494472	3508939	0.07	0.085	0.17	0	1.755	0.385	0	0	Dis	FBgn0038980	Octbeta1R
MI399	chr2	chr2	-	3514192	3515011	0	0.955	0.14	2.73	41.16	2.625	169.49	6.885	Dis	FBgn0036799	CG13380
MI400	chr2	chr2	+	3515828	3523641	10.685	9.89	8.82	15.05	11.255	27.955	9.455	28.17	Fun	FBgn0024273	WASp
MI401	chr2	chr2	-	3524675	3530081	1.59	1.92	5.07	8.065	3.685	3.425	9.125	1.555	Dis	FBgn0039602	CG1647
MI402	chr2	chr2	+	3529871	3532404	5.215	8.295	13.915	48.425	8.62	17.77	19.685	15.035	Fun	FBgn0039601	CG1523
MI403	chr2	chr2	-	3532275	3538106	11.59	14.555	48.62	57.68	25.72	22.685	29.15	14.225	Fun	FBgn0039600	CG1646
MI404	chr2	chr2	+	3539619	3543134	4.105	4.925	9.49	25.235	7.325	10.085	21.965	6.01	Fun	FBgn0005642	wdn
MI405	chr2	chr2	-	3556515	3558466	0.02	0	0	0.035	0	16.19	0	0.455	Fun	FBgn0039599	intr
MI406	chr2	chr2	+	3577686	3580879	0	0	0	0.02	0.01	124.685	0.015	2.825	Dis	FBgn0039598	aqrs
MI407	chr2	chr2	-	3582756	3583311	0	0	0	0	0	6.785	0	0	Dis
MI408	chr2	chr2	+	3585428	3587783	0.405	0.525	0	0.02	0.265	14.42	0	0.31	Dis	FBgn0039596	CG10000
MI409	chr2	chr2	+	3592510	3601001	1.535	1.205	0.55	0.485	2.12	1.09	0.1	0.08	Fun	FBgn0039595	AstA-R2
MI410	chr2	chr2	-	3603675	3644903	2.13	2.5	5.725	4.885	4.325	7.015	3.395	6.22	Fun	FBgn0027655	htt
MI411	chr2	chr2	-	3645378	3660154	3.165	3.68	8.965	14.065	24.46	17.5	5.475	1.5	Fun	FBgn0039594	snu
MI412	chr2	chr2	-	3670927	3671812	0	0	0	0	0.05	0.165	0	0	Sil	FBgn0261289	CheB98a
MI413	chr2	chr2	+	3674157	3676249	0.035	1.245	0.1	18.465	0.015	19.8	0	31.82	Dis	FBgn0011569	can
MI414	chr2	chr2	+	3696112	3696572	0	0	0	7.53	0	27.74	0	54.995	Fun
MI415	chr2	chr2	+	3703654	3704922	0	0	0.665	1.045	0	0	0	0	Fun	FBgn0039592	CG14062
MI416	chr2	chr2	+	3707575	3710645	3.985	0.865	8.165	6.745	6.53	6.06	0	0.555	Fun	FBgn0039592	CG14062
MI417	chr2	chr2	+	3720575	3757059	1.195	1.635	7.12	7.12	4.365	4.025	2.185	1.615	Dis	FBgn0039590	CG10011
MI418	chr2	chr2	-	3755567	3764547	56.575	58.655	158.46	121.87	125.255	50.92	143.995	21.47	Fun	FBgn0039589	CG9986
MI419	chr2	chr2	-	3764727	3766173	0	0	0	3.01	0.025	22.22	0.04	348.35	Fun	FBgn0038978	tHMG1
MI420	chr2	chr2	-	3766281	3770789	0.455	0.525	0.02	1.28	3.23	1.405	5.545	0.91	Fun	FBgn0013953	Esp
MI421	chr2	chr2	+	3766466	3767926	0	0	0	3.52	0	20.965	0	121.645	Fun	FBgn0038978	tHMG1
MI422	chr2	chr2	-	3777501	3781455	0.63	0.42	1.335	0.46	3.5	2.98	0	0.055	Fun	FBgn0039232	sosie
MI423	chr2	chr2	-	3783583	3785966	0	0.03	0	23.785	0	51.595	0	73.6	Fun	FBgn0050384	CG30384
MI424	chr2	chr2	-	3790205	3792510	40.44	42.45	55	71.165	31.365	38.11	35.755	32.325	Fun	FBgn0024509	Sec13
MI425	chr2	chr2	-	3792957	3794211	3.265	3.54	15.24	14.49	6.8	4.12	70.365	11.575	Fun
MI426	chr2	chr2	+	3794939	3795835	355.89	500.85	259.16	267.895	1535.61	1049.51	328.65	90.125	Fun	FBgn0016119	ATPsynCF6
MI427	chr2	chr2	-	3794966	3803009	0.995	1.425	2.43	6.07	3.735	4.965	9.755	3.91	Fun	FBgn0264326	PolE1
MI428	chr2	chr2	-	3824193	3834073	0.1	0.11	0.535	0.28	0.205	0.205	0	0.01	Sil	FBgn0002941	slou
MI429	chr2	chr2	-	3836285	3837546	0	0	0	5.02	0	20.67	0	71.915	Fun	FBgn0030015	CG10761
MI430	chr2	chr2	-	3856164	3856676	2435.84	1235.34	1.215	2.32	0	0	0	0	Fun	FBgn0040565	CG7606
MI431	chr2	chr2	-	3857649	3858794	2154.19	1211.45	2.745	2.245	0	0.035	0	0	Dis	FBgn0038523	Sgs5bis
MI432	chr2	chr2	-	3875821	3879513	0.145	0.135	1.27	0.7	0.145	0.15	0	0	Fun	FBgn0264005	Hmx
MI433	chr2	chr2	-	3879976	3890833	0.09	0.15	0.3	0.435	0.11	0.09	0	0	Sil	FBgn0264005	Hmx
MI434	chr2	chr2	+	3895064	3900141	11.595	14.68	12.92	20.525	18.46	19.64	9.17	18.545	Fun	FBgn0038519	Prx3
MI435	chr2	chr2	-	3900081	3904701	6.405	7.675	20.39	30.77	20.855	16.415	32.975	9.43	Fun	FBgn0025571	SF1
MI436	chr2	chr2	+	3904846	3908394	8.38	8.185	27.675	35.085	17.81	21.84	38.355	23.84	Fun	FBgn0040080	pins
MI437	chr2	chr2	-	3908931	3920048	1.77	1.82	0.04	0.92	0.43	1.155	0.05	1.09	Fun	FBgn0039527	CG5639
MI438	chr2	chr2	-	3922598	3931049	4.125	4.11	5.52	8.815	12.485	9.4	12.605	3.64	Fun	FBgn0039528	dsd
MI439	chr2	chr2	+	3931096	3963743	0.185	0.13	2.335	2.075	1.765	3.335	0.7	2.165	Fun	FBgn0039530	Tusp
MI440	chr2	chr2	-	3950023	3953413	15.8	20.7	12.56	11.395	44.575	49.185	73.955	16.83	Fun	FBgn0039529	CG5612
MI441	chr2	chr2	+	3965461	3969221	5.135	5.465	19.74	29.095	12.195	65.145	35.935	113.1	Fun	FBgn0039532	Mtl
MI442	chr2	chr2	-	3969519	3986234	2.2	2.995	19.425	12.105	20.725	17.36	0.175	1.935	Fun	FBgn0266579	tau
MI443	chr2	chr2	-	3986853	3989917	3398.48	5320.88	89.865	6.845	5659.89	4374.3	129.045	22.505	Fun	FBgn0002772	Mlc1
MI444	chr2	chr2	+	3991456	4006708	0.6	0.42	0.475	0.55	4.95	2.58	2.9	0.275	Fun	FBgn0039536	unc80
MI445	chr2	chr2	-	4006549	4008335	6.98	8.395	28.54	38.17	14.195	12.89	27.905	8.32	Fun	FBgn0032321	YL-1
MI446	chr2	chr2	+	4008204	4011339	79.41	77.205	73.715	51.6	54.925	21.54	50.965	9.17	Fun	FBgn0039537	CG5590
MI447	chr2	chr2	-	4012854	4014488	6.025	7.765	23.73	37.38	12.77	16.895	32.165	10.32	Fun	FBgn0003330	Sce
MI448	chr2	chr2	-	4019503	4022320	0	0.145	0.11	72.41	0	176.83	0.02	177.87	Fun	FBgn0051055	CG31055
MI449	chr2	chr2	+	4019672	4026603	4.75	4.09	173.11	102.01	0.365	0.21	0.09	0.05	Fun	FBgn0046258	CG12880
MI450	chr2	chr2	+	4029190	4032533	46.49	42.295	67.535	111.195	35.665	43.645	31.62	30.555	Fun	FBgn0086346	ALiX
MI451	chr2	chr2	-	4031833	4034133	4.12	5.43	6.12	15.46	6.155	5.56	8.345	4.35	Fun	FBgn0263025	HSPBAP1
MI452	chr2	chr2	+	4034011	4037495	6.585	6.695	14.115	17.605	13.555	11.18	15.11	8.095	Fun	FBgn0045862	btz
MI453	chr2	chr2	-	4037020	4040992	23.055	18.495	10.285	11.03	5.815	7.175	23.74	8.19	Fun	FBgn0039543	CROT
MI454	chr2	chr2	+	4040798	4044554	2.16	2.64	5.47	27.605	5.755	65.405	12.81	50.85	Fun	FBgn0039544	CG12877
MI455	chr2	chr2	+	4054245	4055351	0.77	0.685	1.985	22.21	1.265	16.89	0.545	13.43	Fun	FBgn0004926	eIF2beta
MI456	chr2	chr2	+	4065217	4078084	1.73	1.31	5.955	3.97	11.615	4.335	0.785	0.24	Fun	FBgn0005659	Ets98B
MI457	chr2	chr2	-	4098776	4236965	0.18	0.155	5.595	2.97	1.805	1.72	0.11	0.1	Fun	FBgn0085382	CG34353
MI458	chr2	chr2	+	4114247	4116059	0	0	0.025	13.285	0	72.555	0	149.69	Fun	FBgn0027498	CG2061
MI459	chr2	chr2	-	4119076	4169018	0	0.02	0	0	0	0	0	0	Sil-Dis	FBgn0085382	CG34353
MI460	chr2	chr2	+	4179119	4180553	0	0	0	0	0	0.065	0	0.04	Sil	FBgn0039551	Or98a
MI461	chr2	chr2	-	4203199	4204078	0	0	0	1.51	0	9.395	0	74.63	Fun	FBgn0039552	CG12426
MI462	chr2	chr2	+	4244472	4247196	0	1.825	0.765	349.02	0	643.055	0	1005.8	Fun	FBgn0267366	mil
MI463	chr2	chr2	-	4245057	4250595	3.87	4.605	9.565	11.185	6.03	4.035	12.105	2.665	Fun	FBgn0039554	CG5003
MI464	chr2	chr2	+	4249438	4251739	7.68	7.44	10.15	10.48	16.65	8.14	13.17	4.965	Fun	FBgn0039555	mRpS22
MI465	chr2	chr2	-	4251618	4252945	12.82	17.335	32.675	38.975	43.505	31.075	30.575	12.045	Fun	FBgn0053213	CG33213
MI466	chr2	chr2	+	4253232	4255012	6.715	5.855	18.205	21.745	14.57	9.255	23.1	9.6	Fun	FBgn0001491	l(1)10Bb
MI467	chr2	chr2	-	4254016	4257163	64.165	62.905	65.8	53.33	64.36	52.045	91.07	19.405	Fun	FBgn0019925	Surf4
MI468	chr2	chr2	+	4256662	4259243	12.15	13.57	21.015	36.455	34.45	28.24	69.565	28.49	Dis	FBgn0031008	CG8010
MI469	chr2	chr2	+	4259587	4261687	18.38	17.59	58.515	47.35	50.135	18.97	65.59	8.615	Fun	FBgn0051301	CG31301
MI470	chr2	chr2	+	4261747	4264756	1.28	1.13	5.955	5.37	4.13	2.77	1.7	1.15	Fun	FBgn0261679	CG42726
MI471	chr2	chr2	-	4263224	4264913	4.885	4.775	7.18	14.055	7.015	14.15	14.41	24.46	Fun	FBgn0266722	Trs33
MI472	chr2	chr2	-	4267428	4271006	4.345	3.335	8.805	8.36	9.235	4.9	17.63	2.475	Fun	FBgn0038325	Atg4b
MI473	chr2	chr2	+	4270135	4272967	17.71	21.26	10.325	10.065	34.515	14.855	24.075	3.29	Fun	FBgn0038326	CG5044
MI474	chr2	chr2	-	4272703	4275396	4.645	4.55	8.22	11.165	12.39	9.93	25.125	6.97	Fun	FBgn0026634	Cog2
MI475	chr2	chr2	+	4275399	4279588	16.87	17.035	41.305	55.14	27.395	44.24	46.245	59.56	Fun	FBgn0038327	Trax
MI476	chr2	chr2	-	4276471	4280767	5.905	6.4	14.835	49.31	11.49	44.275	41.98	51.555	Fun	FBgn0026737	CG6171
MI477	chr2	chr2	+	4280834	4303258	18.735	16.765	32.845	38.46	11.86	10.345	12.075	8.32	Fun	FBgn0020278	loco
MI478	chr2	chr2	+	4303478	4305999	0.015	0.065	0.115	0.22	0.145	109.215	0.14	81.115	Fun	FBgn0262009	CG42827
MI479	chr2	chr2	+	4304188	4304637	0	0	0	0	0.085	0	0	0	Sil	FBgn0262009	CG42827
MI480	chr2	chr2	+	4306122	4306596	0	0	0	0	0	36.25	0	15.77	Dis	FBgn0262009	CG42827
MI481	chr2	chr2	-	4306595	4308098	9.165	12.745	17.275	33.55	33.94	19.59	31.395	9.755	Fun	FBgn0263863	mRpL45
MI482	chr2	chr2	-	4308896	4313644	0.61	0.72	2.2	65.725	2.92	439.63	3.295	459.295	Fun	FBgn0267592	CCY
MI483	chr2	chr2	+	4312626	4312891	0	0	0	4.605	0	0.34	0	1.705	Dis
MI484	chr2	chr2	+	4315208	4321721	1.21	1.195	4.215	4.795	4.61	2.005	11.625	1.845	Fun	FBgn0051156	CG31156
MI485	chr2	chr2	-	4319302	4320568	0	0.2	0.035	57.815	0.03	112.98	0	167.435	Fun	FBgn0038993	CG13843
MI486	chr2	chr2	-	4321087	4341526	3.54	4.14	20.165	19.395	18.795	12.92	21.585	5.245	Fun	FBgn0051158	Efa6
MI487	chr2	chr2	+	4344107	4346589	3.15	3.47	5.805	12.76	10.46	9.475	21.205	8.4	Fun	FBgn0037679	Aduk
MI488	chr2	chr2	+	4346748	4347737	71.565	51.33	0	0.09	8.405	3.265	0	0	Fun	FBgn0037678	CG16749
MI489	chr2	chr2	+	4348650	4378091	0.255	0.36	2.985	1.37	4.165	3.885	0	0.03	Fun	FBgn0037676	CG8861
MI490	chr2	chr2	-	4399396	4403930	0	0.01	0.025	0.01	0.08	0.115	0	0	Sil	FBgn0039833	CG15564
MI491	chr2	chr2	-	4404812	4423678	3.05	3.935	3.375	3.64	15.07	7.99	9.845	0.9	Fun	FBgn0051005	qless
MI492	chr2	chr2	+	4423713	4424813	6.72	10.72	18.875	25.81	26.485	12.29	44.59	12.54	Fun	FBgn0039835	mRpL32
MI493	chr2	chr2	-	4424744	4426092	3.52	4.785	7.22	8.04	8.445	5.665	5.39	2.365	Fun	FBgn0039836	CG1750
MI494	chr2	chr2	+	4426381	4428593	7.795	7.075	14.39	30.265	11.76	27.01	20.11	27.615	Fun	FBgn0086362	spn-F
MI495	chr2	chr2	+	4429371	4431493	0	0	0.115	0.065	0.945	0.68	0.13	0	Sil	FBgn0039838	CAH6
MI496	chr2	chr2	+	4433104	4434515	0	0	119.605	2.515	0.095	0.065	0	0	Fun	FBgn0040629	CAH5
MI497	chr2	chr2	+	4436723	4440508	0	0	0	2.81	0	9.4	0	13.41	Fun	FBgn0039839	ppk24
MI498	chr2	chr2	-	4442191	4448480	0.14	0	0.26	0	0.365	0.03	0.145	0	Fun
MI499	chr2	chr2	-	4474831	4477533	4.135	4.735	0.105	0.335	2.57	2.545	0.025	0.17	Fun	FBgn0039840	pHCl-2
MI500	chr2	chr2	+	4483823	4544059	0.675	0.85	8.615	4.88	3.61	1.595	3.54	0.585	Fun	FBgn0085376	CG34347
MI501	chr2	chr2	+	4545294	4547658	0	1.33	0	33.375	0.015	101.235	0	178.91	Fun	FBgn0046332	gskt
MI502	chr2	chr2	+	4556855	4566368	27.25	20.905	27.75	18.965	18.065	9.945	0.155	0.265	Fun	FBgn0039844	CG1607
MI503	chr2	chr2	-	4566266	4568624	0.015	0.05	0	15.395	0.325	118.22	0.375	200.74	Fun	FBgn0051204	CG31204
MI504	chr2	chr2	+	4568966	4575039	2.495	2.46	3.53	12.115	6	12.545	8.87	10.625	Fun	FBgn0019990	Gcn2
MI505	chr2	chr2	-	4574284	4577928	8.63	11.16	7.815	22	17.675	24.705	27.815	42.77	Fun	FBgn0039846	PNPase
MI506	chr2	chr2	+	4578950	4653098	5.6	5.305	20.39	18.585	10.905	6.2	17.57	3.13	Fun	FBgn0261988	Gprk2
MI507	chr2	chr2	-	4653600	4654800	0.03	0.035	0.115	1.555	0.37	0.365	0.36	0.765	Fun	FBgn0039848	Loxl1
MI508	chr2	chr2	-	4654911	4657698	21.24	17.73	6.27	7.72	31.65	16.19	24.305	7.14	Fun	FBgn0039849	CG11334
MI509	chr2	chr2	+	4656607	4657988	0	0.03	0	0.405	0.06	1.61	0	2.45	Fun
MI510	chr2	chr2	+	4659080	4660023	0	0	0	33.72	0	122.415	0	513.98	Fun	FBgn0039850	CG11333
MI511	chr2	chr2	+	4677454	4678834	0	0.205	0	11.715	0	6.115	0	6.325	Fun	FBgn0034423	tbrd-2
MI512	chr2	chr2	+	4705676	4715130	0.35	0.225	32.7	3.995	0.32	0.615	0.01	0.055	Fun	FBgn0039851	mey
MI513	chr2	chr2	-	4719285	4738748	0	0	0	0	0	0.005	0	0.01	Sil
MI514	chr2	chr2	-	4748202	4750528	0	0	0	0	0	0.03	0	0	Sil	FBgn0037836	CG14692
MI515	chr2	chr2	+	4762572	4789868	0.035	0.02	15.305	3.6	0.015	0.08	0	0.065	Fun	FBgn0039852	nyo
MI516	chr2	chr2	+	4797084	4800295	15.72	13.57	75.15	55.565	29.255	20.47	92.725	9.235	Fun	FBgn0039465	Tsp97E
MI517	chr2	chr2	-	4802908	4804179	0	0	0	10.56	0	15.365	0.035	41.215	Fun	FBgn0031443	Prosbeta4R2
MI518	chr2	chr2	+	4804649	4813553	10.035	16.915	29.95	17.13	48.95	35.25	13.505	9.995	Fun	FBgn0039464	CG6330
MI519	chr2	chr2	+	4813833	4815282	0	0.065	0	9.625	0	9.585	0	39.175	Fun
MI520	chr2	chr2	+	4816020	4818274	0.575	0.71	2.665	6.895	1.77	16.47	5.74	31.53	Fun	FBgn0031489	CG17224
MI521	chr2	chr2	-	4817995	4820741	0	0.23	0.015	32.16	0.015	29.21	0	26.265	Fun	FBgn0039463	Spag1
MI522	chr2	chr2	-	4820952	4822724	2.395	2.96	9.755	21.47	7.43	13.425	23.585	10.11	Dis	FBgn0039462	CG14252
MI523	chr2	chr2	-	4823387	4854486	10.415	10.39	4.53	3.98	24.18	12.39	17.97	1.165	Fun	FBgn0285963	CG46339
MI524	chr2	chr2	+	4859871	4862036	3.975	4.42	11.1	9.86	15.615	3.315	25.635	1.725	Fun	FBgn0004510	Ets97D
MI525	chr2	chr2	-	4861708	4901227	1.995	1.975	5.42	3.97	8.41	4.075	29.85	2.94	Fun	FBgn0004359	T48
MI526	chr2	chr2	-	4904789	4909305	7.56	5.745	12	24.875	77.72	119.425	37.705	328.98	Fun	FBgn0039461	CG5500
MI527	chr2	chr2	+	4909506	4913916	2.65	2.87	8.535	7.56	7.525	4.175	13.06	2.3	Fun	FBgn0004903	Rb97D
MI528	chr2	chr2	+	4914033	4916957	386.34	487.735	158	101.235	190.295	57.74	16.36	9.4	Fun	FBgn0026562	SPARC
MI529	chr2	chr2	-	4916877	4918751	78.49	69.85	208.06	146.5	159.53	23.405	328.09	16.665	Fun	FBgn0001197	His2Av
MI530	chr2	chr2	-	4919510	4923959	0.71	3.89	0.665	31.2	0.79	17.825	4.335	63.49	Fun	FBgn0024807	DIP1
MI531	chr2	chr2	+	4920249	4927016	5.07	8.685	19.09	70.38	9.56	30.02	39.17	44.305	Fun	FBgn0027889	ball
MI532	chr2	chr2	-	4926989	4928771	3.415	3.19	5.33	6.63	4.275	4.35	14.65	4.41	Fun	FBgn0039459	IntS12
MI533	chr2	chr2	+	4928182	4950989	37.655	30.49	6.225	7.48	19.14	11.425	11.95	4.805	Fun	FBgn0051072	Lerp
MI534	chr2	chr2	-	4932263	4933295	0	1.79	0	14	0	2.58	0	4.14	Fun
MI535	chr2	chr2	-	4951675	5001177	4.95	4.795	19.985	12.175	23.995	4.725	62.31	1.145	Fun	FBgn0262473	Tl
MI536	chr2	chr2	-	5055960	5058431	0	1.915	0	45.95	0	35.97	0	40.845	Fun	FBgn0039710	dgt1
MI537	chr2	chr2	-	5068230	5069263	11.295	6.17	0.215	0.11	0.685	0.19	0	0	Fun	FBgn0039454	CG14247
MI538	chr2	chr2	+	5070626	5071392	211.485	110.555	0.07	0.13	0.185	0.06	0	0.16	Fun	FBgn0039453	CG6403
MI539	chr2	chr2	-	5077055	5078058	0.65	0.39	3.1	0.855	19.67	26.015	0	0	Fun	FBgn0040608	CG14246
MI540	chr2	chr2	-	5078209	5078689	257.21	414.05	10.445	5.565	91.23	285.345	0	4.74	Fun	FBgn0039452	CG14245
MI541	chr2	chr2	-	5081221	5081844	0.085	0.095	2994.48	1937.11	0.29	1.88	0	2.665	Fun	FBgn0040607	CG14244
MI542	chr2	chr2	+	5081228	5081770	0	0	6.605	1.33	0	0	0	0	Dis
MI543	chr2	chr2	+	5086453	5093049	5.34	5.735	12.245	34.775	10.845	80.12	25.505	80.43	Dis	FBgn0266465	GckIII
MI544	chr2	chr2	-	5091325	5166964	122.35	175.235	17.57	12.765	52.13	24.01	29.355	2.7	Fun
MI545	chr2	chr2	+	5098043	5156629	0.025	0.23	0.075	17.75	0.035	23.61	0.03	22.535	Fun	FBgn0086356	tum
MI546	chr2	chr2	+	5129792	5133946	3.41	23.02	0	0.2	0	0.22	0	1.34	Fun
MI547	chr2	chr2	-	5135656	5163826	58.98	116.355	0.21	0.245	37.615	18.56	0	0.24	Fun	FBgn0038481	CG17475
MI548	chr2	chr2	+	5175971	5177845	44.54	45.725	0.065	0	12.655	5.155	0	0.145	Fun	FBgn0051265	CG31265
MI549	chr2	chr2	-	5179544	5180552	22.81	8.32	0	0	11.915	3.35	0	0	Dis	FBgn0038482	CG4053
MI550	chr2	chr2	+	5180977	5182087	71.74	88.92	0	0.15	47.355	14.86	0	0.305	Fun	FBgn0051266	CG31266
MI551	chr2	chr2	+	5182197	5184497	44.04	77.12	0.095	0.14	20.4	10.86	0	0	Fun	FBgn0051267	CG31267
MI552	chr2	chr2	+	5185149	5186569	166.955	162.965	0.06	0.025	14.6	5.125	0	0.16	Fun	FBgn0038484	CG5246
MI553	chr2	chr2	+	5186845	5187836	4.235	5.69	3.075	7.23	0	0.85	0.05	0.505	Dis	FBgn0038485	CG5255
MI554	chr2	chr2	+	5187935	5188939	0	0.04	0	0.035	0	29.665	0	1.09	Dis	FBgn0038485	CG5255
MI555	chr2	chr2	-	5192814	5194070	0	0	0	16.035	0	18.42	0	33.11	Dis	FBgn0037788	CAH7
MI556	chr2	chr2	-	5196574	5202988	34.93	22.78	208.975	98.645	44.745	37.565	3.215	4.325	Fun	FBgn0037788	CAH7
MI557	chr2	chr2	+	5206597	5214581	12.2	13.83	36.96	53.675	37.485	37.545	47.99	22.39	Fun	FBgn0028734	Fmr1
MI558	chr2	chr2	-	5216014	5223235	0.035	0.06	0.17	0.09	2.185	1.71	0.39	0.03	Fun
MI559	chr2	chr2	-	5226045	5234486	1.525	1.21	1.725	1.905	4.77	2.45	1.6	0.235	Dis
MI560	chr2	chr2	-	5244534	5248903	0.01	0.05	0.155	0.145	0.05	0.01	0	0	Sil	FBgn0041105	nerfin-2
MI561	chr2	chr2	-	5251000	5252133	0	0	0	0	0	0	0	0	Sil-Dis	FBgn0053783	CG33783
MI562	chr2	chr2	-	5252654	5253613	0	0	0	0	0	0	0	0	Sil	FBgn0053784	CG33784
MI563	chr2	chr2	-	5253881	5255163	0.035	0.07	0	0	0	0	0	0	Sil	FBgn0053784	CG33784
MI564	chr2	chr2	-	5261384	5262262	93.56	71.17	0	0.165	0.875	0.135	0	0.28	Fun	FBgn0037783	Npc2c
MI565	chr2	chr2	+	5267722	5268528	126.94	138.32	0	0.06	49.515	22.445	0	0	Fun	FBgn0037782	Npc2d
MI566	chr2	chr2	-	5269948	5271654	7.275	4.3	0.08	1.775	32.235	15.285	0.045	5.075	Fun	FBgn0051410	Npc2e
MI567	chr2	chr2	+	5270013	5274006	14.775	12.855	1.825	7.12	3.785	7.09	8.74	8.955	Fun	FBgn0037781	Fancl
MI568	chr2	chr2	-	5273530	5276369	8.045	7.255	19.965	33.85	10.915	54.69	17.25	66.99	Fun	FBgn0037780	ohgt
MI569	chr2	chr2	+	5276192	5277937	63.56	44.155	236.49	145.965	28.435	16.57	21.315	14.25	Fun	FBgn0037779	CG12811
MI570	chr2	chr2	-	5277726	5279569	3.715	3.805	5.97	3.97	7.21	2.27	8.8	0.9	Fun	FBgn0037778	mtTFB2
MI571	chr2	chr2	+	5279656	5280724	7.66	7.005	11.16	19.825	28.83	13.605	24.19	6.375	Fun	FBgn0037777	CG11722
MI572	chr2	chr2	-	5280695	5282160	23.155	24.18	49.91	70.595	33.045	51.015	97.97	98.315	Fun	FBgn0027524	CG3909
MI573	chr2	chr2	+	5284140	5337089	2.925	2.66	66.41	138.545	14.22	16.67	8.815	24.4	Dis	FBgn0053208	Mical
MI574	chr2	chr2	+	5337728	5339482	1.99	1.94	10.55	7.08	7.655	3.755	41.55	2.35	Fun	FBgn0037773	CG5359
MI575	chr2	chr2	+	5342354	5345440	0	0	0.025	0.04	0.02	0.045	0	0	Sil	FBgn0045473	Gr85a
MI576	chr2	chr2	-	5353171	5417346	5.78	5.355	27.515	15.235	28.295	19.225	5.975	1.365	Fun	FBgn0267336	Glut4EF
MI577	chr2	chr2	+	5358879	5362530	5.27	5.595	18.175	22.8	18.575	6.31	41.09	4.76	Fun	FBgn0037770	Art4
MI578	chr2	chr2	-	5479535	5480506	0.22	0.19	0	1.17	0.305	1.65	0	3.8	Fun
MI579	chr2	chr2	+	5483693	5499317	48.015	48.09	61.82	71.465	92.945	73.855	37.065	28.59	Fun	FBgn0022344	CG10340
MI580	chr2	chr2	-	5485207	5487102	1.225	2.12	5.4	1.68	8.24	5.55	0	0.025	Fun	FBgn0038449	CG17562
MI581	chr2	chr2	-	5487543	5491891	3.25	5.32	5.85	5.015	35.87	34.755	1.195	0.85	Fun	FBgn0038450	CG17560
MI582	chr2	chr2	-	5491957	5494158	22.56	18.24	34.335	32.835	19.56	3.445	4.785	0.445	Fun	FBgn0038449	CG17562
MI583	chr2	chr2	-	5501397	5502788	1.4	2.51	0.65	0.43	4.59	3.365	0.075	0	Fun	FBgn0027109	NPF
MI584	chr2	chr2	+	5506976	5514183	1.48	1.28	0.045	0.515	15.98	11.06	0	0.235	Fun	FBgn0027562	CG10345
MI585	chr2	chr2	-	5514188	5520451	0	0.01	0.04	0.02	0.04	0.075	0	0.025	Sil	FBgn0038447	CG14892
MI586	chr2	chr2	+	5525850	5534891	23.965	25.205	5.72	1.62	93.46	68.005	0	0.305	Fun	FBgn0020907	Scp2
MI587	chr2	chr2	+	5540407	5541402	4.825	4.675	4.405	3.775	8.57	3.935	32.675	3.68	Fun	FBgn0038446	CG14903
MI588	chr2	chr2	-	5541020	5603003	1.915	1.885	22.145	19.22	3.245	7.93	0.37	7.27	Dis	FBgn0259244	CG42342
MI589	chr2	chr2	+	5605758	5606994	61.32	54.155	0.08	0.375	21.59	12.44	0	0.65	Fun	FBgn0028381	Decay
MI590	chr2	chr2	-	5606966	5608697	0.04	0.065	0	0.385	0	1.45	0	5.56	Fun
MI591	chr2	chr2	-	5621564	5622539	5.3	9.415	2.525	2.045	0.25	0.255	0.755	0.06	Fun	FBgn0042206	GstD10
MI592	chr2	chr2	-	5623042	5624054	6.79	9.075	26.115	21.095	39.945	14.745	58.775	7.215	Fun	FBgn0038020	GstD9
MI593	chr2	chr2	-	5624102	5626024	307.37	324.395	375.22	325.995	210.075	169.725	350.63	226.84	Fun	FBgn0001149	GstD1
MI594	chr2	chr2	+	5624116	5624885	0	0.06	2.22	0.48	0.11	0.055	0	0	Dis
MI595	chr2	chr2	+	5626578	5629278	37.665	35.51	36.645	27.345	25.61	35.35	4.33	97.015	Fun	FBgn0010038	GstD2
MI596	chr2	chr2	+	5630343	5631103	2.655	1.575	5.59	4.03	0.11	0	0	0.13	Fun	FBgn0010040	GstD4
MI597	chr2	chr2	+	5631983	5632763	102.28	57.145	26.62	25.11	5.18	2.07	0.225	0.225	Fun	FBgn0010040	GstD4
MI598	chr2	chr2	+	5634315	5635086	9.225	9.815	0.615	0.595	4.27	2.025	11.34	0.075	Fun	FBgn0010044	GstD8
MI599	chr2	chr2	-	5636110	5637545	0	0	0.105	0.275	0.05	0.25	0	0	Sil	FBgn0038028	CG10035
MI600	chr2	chr2	-	5638517	5639194	0	0	0	2.065	0	2.555	0	4.145	Fun
MI601	chr2	chr2	+	5641029	5642534	0.025	0.03	0.03	0	25.615	29.98	0	0	Fun	FBgn0053098	CG33098
MI602	chr2	chr2	+	5643227	5658268	25.415	31.46	11.67	11.215	36.435	12.66	27.055	4.475	Fun	FBgn0038038	Sccpdh2
MI603	chr2	chr2	-	5644033	5646355	1.765	2.115	0.83	1.295	26.965	116.82	0.025	5.25	Fun	FBgn0038032	CG10096
MI604	chr2	chr2	-	5647236	5649322	0.04	0.105	0.02	0.075	42.155	35.185	0.025	0.75	Fun	FBgn0032055	Sgp
MI605	chr2	chr2	-	5650112	5656169	285.02	211.2	56.09	14.615	87.955	44.165	10.37	6.975	Fun	FBgn0038037	Cyp9f2
MI606	chr2	chr2	+	5658364	5662015	15.305	13.185	31.12	69.345	14.99	149.905	24.38	253.455	Fun	FBgn0038039	CG5196
MI607	chr2	chr2	-	5662444	5664213	122.085	100.14	103.255	92.345	56.61	29.865	28.625	10.375	Fun	FBgn0000455	Dip-C
MI608	chr2	chr2	+	5663525	5672269	1.02	1.32	3.52	7.72	5.635	7.705	8.64	4.76	Fun	FBgn0082831	pps
MI609	chr2	chr2	-	5671941	5673398	1.92	1.925	10.935	6.98	4.31	3.47	0.395	1.95	Dis	FBgn0038042	Scgbeta
MI610	chr2	chr2	+	5673794	5674923	10.79	12.095	32.19	32.965	49.095	9.455	70.2	5.885	Fun	FBgn0038043	CG17202
MI611	chr2	chr2	-	5674878	5677073	126.885	103.83	212.005	174.37	170.15	92.955	138.935	43.655	Fun	FBgn0004103	Pp1-87B
MI612	chr2	chr2	+	5677060	5682547	27.675	23.64	36.51	47.24	27.495	40.245	70.96	75.1	Fun	FBgn0086134	Prosalpha2
MI613	chr2	chr2	-	5679243	5681066	19.46	22.555	78.22	94.84	35.765	36.68	48.28	32.155	Fun	FBgn0038046	CG5641
MI614	chr2	chr2	-	5682424	5683812	15.47	18.55	53.97	72.89	38.5	37.13	144.495	53.99	Fun	FBgn0029512	Aos1
MI615	chr2	chr2	+	5683302	5688448	128.87	231.255	19.665	54.37	713.27	249.605	118.22	212.81	Fun	FBgn0043043	Desat2
MI616	chr2	chr2	+	5690436	5692640	0.09	0.16	0	19.625	0.205	83.475	0	146.365	Dis	FBgn0035218	CG9173
MI617	chr2	chr2	+	5692746	5699499	900.66	1019.24	70.46	63.49	674.745	243.295	237.585	32.505	Fun	FBgn0086687	Desat1
MI618	chr2	chr2	+	5700484	5706100	11.705	6.015	33.81	27.755	21.915	16.43	32.07	10.33	Fun	FBgn0038053	CG18549
MI619	chr2	chr2	-	5706009	5709571	5.52	16.635	10.98	352.3	11.8	381.4	48.74	544.225	Fun	FBgn0025637	SkpA
MI620	chr2	chr2	+	5711742	5719482	7.44	9.39	31.615	40.955	42.63	27.48	102.515	16.67	Fun	FBgn0038055	trus
MI621	chr2	chr2	-	5725504	5727534	16.225	12.41	19.69	20.325	37.7	12.2	63.425	7.92	Fun	FBgn0038056	CG5961
MI622	chr2	chr2	+	5727300	5729643	8.345	8.865	15.36	12.335	27.34	7.75	26.88	3.075	Fun	FBgn0038057	CG12267
MI623	chr2	chr2	-	5729344	5732300	3.555	3.11	8.02	8.18	5.745	5.37	11.06	3.315	Fun	FBgn0038058	CG5608
MI624	chr2	chr2	-	5732794	5740306	34.215	32.99	18.045	528.76	4.275	2.475	26.05	6.06	Fun	FBgn0013279	Hsp70Bc
MI625	chr2	chr2	+	5732891	5746915	38.62	43.87	27.345	700.205	2.565	2.385	17.555	6.055	Fun	FBgn0013279	Hsp70Bc
MI626	chr2	chr2	-	5744529	5757210	3.765	4.225	8.02	8.885	14.065	6.845	21.89	3.45	Dis	FBgn0278604	dmt
MI627	chr2	chr2	+	5757014	5761944	2.615	2.885	6.025	22.33	21.6	57.24	25.875	61.475	Fun	FBgn0037734	trbd
MI628	chr2	chr2	+	5762995	5773175	21.53	25.18	20.635	23.59	32.63	56.795	5.24	51.745	Fun	FBgn0051352	Unc-115a
MI629	chr2	chr2	-	5773075	5774393	3.62	2.965	11.155	13.67	11.67	8.97	23.54	8.65	Fun	FBgn0052939	CG32939
MI630	chr2	chr2	+	5774419	5778210	4.23	4.79	19.52	19.355	6.575	5.1	10.245	2.815	Fun	FBgn0038870	Oga
MI631	chr2	chr2	-	5777945	5779250	3.66	3.39	6.17	15.47	10.725	14.3	13.27	17.415	Fun	FBgn0038871	CG3337
MI632	chr2	chr2	+	5779066	5785155	2.095	2.34	6.905	7.465	7.88	5.93	17.38	4.68	Fun	FBgn0038872	Nelf-A
MI633	chr2	chr2	-	5785847	5794501	0.13	0.23	0.555	0.655	8.845	2.865	0	0.625	Fun	FBgn0000527	e
MI634	chr2	chr2	+	5798435	5801296	9.355	4.15	0	0.045	14.805	8.765	0	0.165	Fun	FBgn0038873	CG5892
MI635	chr2	chr2	+	5803090	5818065	1.8	2.55	0.485	0.52	0.35	0.305	0	0.085	Fun	FBgn0038874	ETHR
MI636	chr2	chr2	-	5819730	5822909	101.94	79.325	118.94	106.295	121.415	111.78	248.11	153.565	Fun	FBgn0285937	Rab1
MI637	chr2	chr2	-	5822993	5823924	29.085	24.71	63.45	54.005	47.275	33.25	864.77	293.155	Fun	FBgn0043012	AP-2sigma
MI638	chr2	chr2	+	5823938	5825418	8.145	9.055	11.06	16.465	15.37	15.935	16.76	10.55	Fun	FBgn0038876	Idi
MI639	chr2	chr2	-	5824929	5827449	32.91	28.44	32.29	25.49	72.725	47.05	78.535	19.945	Fun	FBgn0038877	CG3308
MI640	chr2	chr2	-	5827652	5828773	12.645	13.24	18.43	14.795	30.555	8.54	55.005	4.185	Fun	FBgn0038878	CG3301
MI641	chr2	chr2	-	5830796	5834544	0.095	0.1	0.06	0.14	0.31	0.285	0	0.03	Sil	FBgn0038880	SIFaR
MI642	chr2	chr2	+	5837245	5837863	0	0	0	0.115	0.44	0.36	0	0.13	Sil	FBgn0038879	CG17298
MI643	chr2	chr2	-	5839268	5856264	0	0.02	0	0.01	0.06	0.09	0	0.055	Sil	FBgn0038880	SIFaR
MI644	chr2	chr2	-	5899736	5931454	3.45	3.045	22.48	14.315	7.18	6.855	2.055	3.18	Fun	FBgn0038881	CG16791
MI645	chr2	chr2	-	5932562	5958965	26.54	24.795	109.845	118.29	69.265	44.9	159.19	33.31	Fun	FBgn0002781	mod(mdg4)
MI646	chr2	chr2	+	5941849	5945298	9.235	7.44	37.38	26.395	22.72	15.425	43.025	5.505	Fun	FBgn0261837	pre-mod(mdg4)-T
MI647	chr2	chr2	+	5948093	5951634	1.355	1.195	7.355	5.06	3.37	2.5	7.83	3.425	Fun	FBgn0261844	pre-mod(mdg4)-V
MI648	chr2	chr2	+	5960220	5965631	0	0.02	0.11	0.16	0.015	0.035	0	0.045	Sil	FBgn0004110	tin
MI649	chr2	chr2	+	5968570	5969477	0	0	0	0	0.13	0.76	0	0	Sil	FBgn0261292	CheB53a
MI650	chr2	chr2	+	5973038	5973852	0.945	0.72	1.78	1.29	0.86	0.53	0	0	Dis	FBgn0004862	bap
MI651	chr2	chr2	-	5984697	5986619	0	0	0	0	0	0.195	0	0.025	Sil	FBgn0261293	CheB53b
MI652	chr2	chr2	+	5987092	5989094	3.4	2.325	0.025	0	0.79	0.045	0	0	Fun	FBgn0038076	Cyp313a4
MI653	chr2	chr2	+	5989815	5992166	0.755	0.405	0	0	2.33	0.85	1.005	0.805	Fun	FBgn0038076	Cyp313a4
MI654	chr2	chr2	+	5992573	5995448	6.07	6.25	20.935	25.765	18.325	17.46	27.105	10.715	Fun	FBgn0026207	mbo
MI655	chr2	chr2	-	5995269	5996889	111.12	152.565	6.385	7.415	57.975	44.82	0.235	1.345	Fun	FBgn0038074	Gnmt
MI656	chr2	chr2	-	5997235	6005319	0.03	0.01	0.505	0.135	0.015	0.025	0	0	Sil	FBgn0038073	CG14395
MI657	chr2	chr2	-	6010499	6017230	2.91	4.04	0.12	0.095	11.27	9.33	0.5	3.65	Fun	FBgn0038072	CG6225
MI658	chr2	chr2	-	6018819	6023961	7.99	6.26	66.395	45.395	1.385	1.005	0.265	0.97	Dis	FBgn0038071	Dtg
MI659	chr2	chr2	+	6029705	6031153	0.145	0.335	0.54	1.465	0.605	0.405	0.28	0.955	Dis	FBgn0038070	CG6753
MI660	chr2	chr2	-	6032838	6036295	0	0	0	0	0	134.89	0.04	5.13	Fun	FBgn0042207	CG18530
MI661	chr2	chr2	+	6039034	6042552	0.935	0.62	14.515	9.01	3.385	2.9	10.66	1.22	Fun	FBgn0038815	CG5466
MI662	chr2	chr2	+	6043119	6050184	2.055	2.39	10.18	11.155	7.315	7.22	21.015	4.53	Fun	FBgn0001169	H
MI663	chr2	chr2	-	6050059	6055135	4.71	5.43	11.48	17.21	21.25	7.85	23.125	3.055	Fun	FBgn0015279	Pi3K92E
MI664	chr2	chr2	+	6057782	6067431	2.095	2.06	7.67	6.64	3.78	2.41	1.915	0.805	Fun	FBgn0038816	Lrrk
MI665	chr2	chr2	-	6066838	6074340	0.995	1.615	0.37	0.335	1.045	0.815	0.265	0.47	Fun	FBgn0028422	GluRIID
MI666	chr2	chr2	-	6074444	6081836	1.595	1.575	7.51	22.15	3.985	31.195	0.09	38.685	Fun	FBgn0038818	Nep4
MI667	chr2	chr2	+	6091381	6094300	7.085	12.68	10.975	3.97	366.125	226.72	2.605	2.72	Fun	FBgn0038819	Cpr92F
MI668	chr2	chr2	-	6098405	6099620	0	0	4.095	1.545	965.4	497.76	0	0	Fun	FBgn0038820	CG4000
MI669	chr2	chr2	-	6110087	6111897	0.115	0.13	1.455	0.925	1.44	0.915	1.955	0.29	Dis	FBgn0024944	Oamb
MI670	chr2	chr2	-	6112859	6114973	0.165	0.16	0.13	0.08	1.17	1.205	3.34	0.12	Fun	FBgn0024944	Oamb
MI671	chr2	chr2	+	6155891	6156955	0	0	0.175	1.415	17.3	16.575	0	0	Fun	FBgn0051205	CG31205
MI672	chr2	chr2	+	6157604	6161310	0.15	0.065	20.895	14.12	0.25	2.68	0.12	3.48	Fun	FBgn0033232	CG12159
MI673	chr2	chr2	+	6163541	6163775	0	0	0	0	0	0	0	1.545	Dis	FBgn0028692	Rpn2
MI674	chr2	chr2	-	6163640	6166197	0.35	0.375	1.44	3.05	6.205	2.75	10.2	2.485	NA
MI675	chr2	chr2	-	6167307	6169685	0.425	0.27	0.59	1.095	2.295	1.61	2.385	0.96	Dis	FBgn0000119	arr
MI676	chr2	chr2	+	6169690	6171606	8.09	7.425	32.475	35.22	20.24	7.05	65.265	5.99	Fun	FBgn0004107	Cdk2
MI677	chr2	chr2	-	6171489	6172829	3.295	3.56	0.065	0.06	0.175	0.22	0.045	0	Fun	FBgn0038821	CG17267
MI678	chr2	chr2	+	6174448	6180430	0.3	0.11	0.665	0.49	3.98	2.64	2.46	0.42	Dis	FBgn0259222	CG42322
MI679	chr2	chr2	-	6176633	6177647	0	0	3.32	2.955	56.045	44.2	1.205	0.24	Fun	FBgn0051199	CG31199
MI680	chr2	chr2	-	6177864	6195098	5.65	5.495	25.15	17.475	13.135	8.335	11.7	3.58	Fun	FBgn0051195	CG31195
MI681	chr2	chr2	+	6180506	6189022	0.35	0.31	1.8	1.15	3.925	3.675	0.66	0.155	Dis	FBgn0259222	CG42322
MI682	chr2	chr2	+	6189110	6238643	38.12	45.615	330.99	282.22	61.695	607.6	10.045	600.585	Fun	FBgn0038826	Syp
MI683	chr2	chr2	-	6202552	6205402	0.76	0.765	3.055	1.96	0.69	0.49	0	0	Fun	FBgn0046689	Takl1
MI684	chr2	chr2	-	6244503	6250061	1.24	1.225	3.13	6	3.28	3.63	6.185	2.755	Fun	FBgn0038827	Fancd2
MI685	chr2	chr2	-	6250162	6252433	1.615	1.255	16.08	10.49	6.95	3.13	13.495	1.845	Fun	FBgn0038828	CG17270
MI686	chr2	chr2	-	6252504	6255469	79.4	88.3	44.135	50.29	49.115	87.415	45.49	66.73	Fun	FBgn0038829	CG17271
MI687	chr2	chr2	+	6256122	6263356	18.54	25.37	10.72	15.495	28.37	12.165	16.37	19.22	Fun	FBgn0039045	CG17119
MI688	chr2	chr2	+	6264868	6274342	4.38	3.84	13.2	14.745	20.66	12.375	48.575	12.465	Fun	FBgn0039043	CG17121
MI689	chr2	chr2	-	6273967	6275124	3.29	2.505	0.04	0	0.77	0.04	0	0	Fun	FBgn0039042	CG13837
MI690	chr2	chr2	-	6276510	6277083	0	0	0	12.035	0	97.9	0.2	996.25	Fun	FBgn0039041	CG13838
MI691	chr2	chr2	+	6283544	6285061	5.025	3.26	0.57	0.595	13.585	24.305	0.155	1.62	Fun	FBgn0039040	CG13833
MI692	chr2	chr2	+	6292814	6297892	0.145	0.18	3.635	1.785	0.23	0.095	0.035	0.02	Fun	FBgn0039039	lmd
MI693	chr2	chr2	-	6304544	6307008	0.94	0.56	0.07	0.22	1.55	2.075	0	2.21	Fun	FBgn0039038	CG6688
MI694	chr2	chr2	+	6308855	6322390	0.92	0.715	1.785	0.955	4.57	0.9	3.78	0.74	Fun	FBgn0085404	CG34375
MI695	chr2	chr2	+	6324799	6344242	4.645	4.845	1.44	1.69	7.565	2.525	1.115	0.88	Fun	FBgn0263390	Nha2
MI696	chr2	chr2	-	6367942	6417508	0.415	0.48	10.05	5.53	1.81	2.08	0.06	0.365	Fun	FBgn0017590	klg
MI697	chr2	chr2	-	6393678	6394797	16.215	19.19	37.2	38.965	25.61	17.495	0	0.69	Fun	FBgn0039030	CG6660
MI698	chr2	chr2	+	6469391	6471492	0	0	0	7.805	0	19.64	0	27.97	Fun	FBgn0039029	CG4704
MI699	chr2	chr2	-	6477646	6489793	0	0	0	0	0	0	0.015	0.015	Sil
MI700	chr2	chr2	+	6491104	6495080	0.035	0.375	0.17	18.31	0.385	15.1	1	12.215	Fun	FBgn0036892	Lon
MI701	chr2	chr2	+	6512824	6514269	0.025	0	0.06	0	0	0	0.035	0	Sil	FBgn0039028	CG13840
MI702	chr2	chr2	-	6527680	6529506	0.105	0.265	4.365	3.78	0	0.095	0	0.025	Fun	FBgn0039027	CG7031
MI703	chr2	chr2	+	6545398	6546259	0	0	0	3.77	0.055	65.48	0	203.83	Fun
MI704	chr2	chr2	-	6547355	6560291	17.585	14.45	32.185	34.46	41.77	39.955	33.545	20.53	Fun	FBgn0039026	CG7029
MI705	chr2	chr2	+	6572998	6574712	0	0	0.05	0.02	9.97	6.565	0	0.03	Dis
MI706	chr2	chr2	+	6574958	6576164	0.035	0	0.04	0.035	1.77	1.53	0	0	Fun	FBgn0040588	CG13841
MI707	chr2	chr2	+	6576970	6582022	18.39	16.505	15.5	15.94	10.605	8.31	0.02	0.315	Fun	FBgn0039023	Nepl14
MI708	chr2	chr2	+	6582688	6585686	7	7.875	5.16	5.795	4.795	4.055	0	1.145	Fun	FBgn0039022	Nepl13
MI709	chr2	chr2	+	6592648	6596708	3.67	3.535	11.535	17.485	5.675	47.7	24.38	79.4	Fun	FBgn0086253	rumi
MI710	chr2	chr2	-	6592884	6594610	0	0.02	0.07	1.41	0	1.565	0	2.005	Fun
MI711	chr2	chr2	-	6596504	6598585	15.24	15.49	44.76	40.255	18.765	10.63	21.215	5.225	Fun	FBgn0039019	HP1c
MI712	chr2	chr2	+	6597457	6601762	1.015	1.98	4.715	10.03	7.135	7.76	21.835	7.125	Fun	FBgn0263143	vret
MI713	chr2	chr2	-	6600862	6603373	1.835	2.075	7.085	14.09	6.955	4.765	14.025	4.42	Fun	FBgn0039017	CG6985
MI714	chr2	chr2	+	6607934	6616897	4	4.15	10.57	9.605	7.145	3	8.355	1.45	Fun	FBgn0039016	Dcr-1
MI715	chr2	chr2	-	6618660	6623580	10.16	11.025	26.235	20.08	24.135	19.195	20.275	6.42	Fun	FBgn0266409	CG45049
MI716	chr2	chr2	+	6623893	6625471	2.54	3.41	9.595	22.12	4.87	10.07	16.615	11.77	Fun	FBgn0039013	CG4813
MI717	chr2	chr2	+	6627423	6630834	16.115	17.685	10.08	15.355	18.595	10.74	34.64	10.195	Fun	FBgn0024958	Irp-1A
MI718	chr2	chr2	-	6627530	6631216	0	0.01	0.035	1.425	0.01	3.915	0	5.78	Fun
MI719	chr2	chr2	+	6631645	6641976	4.235	4.95	9.775	10.02	9.99	7.61	10.065	3.11	Fun	FBgn0051151	wge
MI720	chr2	chr2	-	6645293	6647623	12.26	17.7	33.795	5.975	20.475	16.69	1.51	0.415	Fun	FBgn0039008	CG6972
MI721	chr2	chr2	+	6648062	6649147	0.245	0.265	2.485	0.665	0.54	0.78	0.075	0	Fun	FBgn0039007	CCAP
MI722	chr2	chr2	-	6649861	6659416	5.15	7.26	3.85	6.95	6.655	5.515	4.02	2.51	Fun	FBgn0038344	obe
MI723	chr2	chr2	+	6661270	6661971	0.485	1.05	11.7	4.895	4.895	4.67	0	0.095	Fun	FBgn0038343	Trissin
MI724	chr2	chr2	-	6662015	6663571	3.105	2.535	0.085	0.145	8.765	9.705	0.03	0.03	Fun	FBgn0019940	Rh6
MI725	chr2	chr2	-	6663685	6671534	0.2	0.455	2.225	15.7	0.595	5.685	0.535	24.46	Fun	FBgn0038342	B9d1
MI726	chr2	chr2	+	6670767	6704923	0.96	1.06	2.49	1.745	11.48	5.01	5.34	0.225	Dis	FBgn0286071	AdamTS-A
MI727	chr2	chr2	-	6704921	6707099	0	0	57.19	2.075	3231.41	2112.53	0	0.03	Fun	FBgn0000047	Act88F
MI728	chr2	chr2	-	6709273	6719463	0	0.425	0.01	95.075	0.02	269.005	0.015	269.64	Fun	FBgn0042177	Arts
MI729	chr2	chr2	-	6713345	6714513	10.155	6.61	12.26	15.425	19.695	1.72	49.33	0.04	Fun	FBgn0037548	CG7900
MI730	chr2	chr2	-	6739854	6742286	3.535	4.11	4.26	14.43	45.305	44.36	0.295	15.945	Fun	FBgn0037547	CG7910
MI731	chr2	chr2	-	6742406	6747619	0.04	0.07	0.73	0.285	0.49	0.38	0.01	0.01	Sil	FBgn0037546	mAChR-B
MI732	chr2	chr2	+	6760908	6762139	0	0	0	20.47	0	11.145	0	14.525	Fun	FBgn0034554	CAH14
MI733	chr2	chr2	-	6786054	6786866	0.175	0.185	0.19	0.22	0	49.85	0	219.795	Fun
MI734	chr2	chr2	-	6788832	6789996	0.125	0.045	0.245	0.47	0.04	81	0.115	2.735	Dis
MI735	chr2	chr2	-	6790003	6790777	48.405	20.205	48.4	31.395	4.92	4.9	0	1.025	Fun	FBgn0054034	CG34034
MI736	chr2	chr2	+	6791713	6796712	4.485	3.92	4.215	3.975	7.235	2.21	0.12	0.365	Fun	FBgn0038897	CG5849
MI737	chr2	chr2	+	6796910	6800102	165.655	318.385	0.09	0.06	63.38	21.245	0	0.075	Fun	FBgn0051343	CG31343
MI738	chr2	chr2	+	6801653	6804895	79.7	135.515	0	0.115	96.075	19.505	0.015	0	Dis	FBgn0051233	CG31233
MI739	chr2	chr2	+	6807562	6810919	55.51	60.705	0.125	0.385	155.345	30.485	0.04	0.13	Fun	FBgn0051198	CG31198
MI740	chr2	chr2	+	6813408	6816627	4.21	4.19	0.21	0.48	13.21	3.985	1.265	0.065	Fun	FBgn0259237	CG42335
MI741	chr2	chr2	+	6816810	6817625	0.065	0.07	3.02	2.755	0	0.455	0	0.865	Fun	FBgn0038901	Burs
MI742	chr2	chr2	-	6817902	6823360	0.55	0.575	4.715	3.44	4.255	2.65	2.77	0.835	Fun	FBgn0027575	GABA-B-R2
MI743	chr2	chr2	-	6826137	6827803	0	0.08	0.03	17.555	0	96.4	0	192.045	Fun	FBgn0034800	CG3788
MI744	chr2	chr2	-	6828664	6833307	10.86	10.71	17.525	10.245	13.43	3.985	10.235	0.255	Fun	FBgn0003867	tsl
MI745	chr2	chr2	-	6833733	6843778	4.07	4.725	46.925	25.56	21.13	17.705	16.56	4.29	Fun	FBgn0013759	CASK
MI746	chr2	chr2	+	6880488	6882512	0	0.02	1.05	0.945	0	0.04	0.025	0.04	Fun	FBgn0041229	Gr93a
MI747	chr2	chr2	-	6889774	6896397	0	0	0.03	0.02	0.02	0.02	0.01	0.01	Sil	FBgn0045470	Gr93b
MI748	chr2	chr2	-	6899299	6905139	8.6	7.145	109.56	60.89	27.685	15.2	44.155	7.055	Fun	FBgn0015229	glec
MI749	chr2	chr2	+	6913811	6914891	14.29	13.66	28.27	64.525	19.525	40.38	31.315	53.63	Fun	FBgn0260940	lsn
MI750	chr2	chr2	-	6914838	6925335	1.155	1.445	2.725	20.5	3.08	55.135	8.905	64.49	Fun	FBgn0038909	CG6569
MI751	chr2	chr2	+	6916094	6917009	2.125	2.985	2.545	30.45	6.26	119.255	2.22	282.895	Fun	FBgn0051431	CG31431
MI752	chr2	chr2	+	6923262	6928001	2.05	1.98	3.605	19.865	10.165	102.095	3.14	165.25	Dis	FBgn0053092	P5CDh2
MI753	chr2	chr2	+	6928101	6931315	0	0.175	0	62.49	0	72.37	0	60.43	Fun	FBgn0051465	CG31465
MI754	chr2	chr2	-	6931250	6931711	0	0	0.135	0.225	893.5	0.64	139.005	0.14	Dis	FBgn0038914	fit
MI755	chr2	chr2	-	6931972	6935402	0.485	0.18	11.08	7.555	5.42	13.5	10.315	39.955	Fun	FBgn0038916	dnd
MI756	chr2	chr2	+	6932313	6935982	1.055	1.005	4.815	4.25	3.24	2.085	5.565	2.11	Fun	FBgn0038917	CG6678
MI757	chr2	chr2	-	6936418	6937657	0	0.085	0.62	12.48	0	55.43	0	132.76	Fun	FBgn0051482	CG31482
MI758	chr2	chr2	+	6962968	6965880	10.995	11.42	36.57	80.895	8.325	34.575	0	0.445	Fun	FBgn0038919	Qsox2
MI759	chr2	chr2	-	6995761	6997908	0	0	1.21	0.275	0.065	0.02	0.115	0	Fun
MI760	chr2	chr2	+	6999260	7065113	0.365	0.44	274.775	175.885	14.39	11.15	3.41	2.02	Fun	FBgn0264490	Eip93F
MI761	chr2	chr2	-	7031620	7052101	0	0	3.695	0.705	0	0	0	0	Dis
MI762	chr2	chr2	-	7045045	7045749	0	0	0	17.195	0	23.61	0	43.52	Fun	FBgn0015286	Rala
MI763	chr2	chr2	+	7075679	7077188	0	0.27	0	65.205	0	292.25	0	465.325	Fun	FBgn0038921	Theg
MI764	chr2	chr2	-	7077108	7084747	34.32	59.64	20.215	48.81	311.625	342.635	40.7	198.435	Dis	FBgn0019960	Mitofilin
MI765	chr2	chr2	+	7084182	7085262	35.8	35.38	39.305	64.965	41.915	70.625	46.815	129.475	Fun	FBgn0038923	mRpL35
MI766	chr2	chr2	-	7085176	7086476	183.93	161.045	65.67	75.28	70.415	51.805	84.29	37.2	Fun	FBgn0038924	CG6028
MI767	chr2	chr2	+	7087308	7091040	1.445	1.925	5.675	7.525	3.2	3.14	8.055	1.41	Fun	FBgn0039696	Rnb
MI768	chr2	chr2	-	7090730	7098537	22.195	19.555	11.805	26.325	59.525	50.515	7.485	11.675	Dis	FBgn0001297	kay
MI769	chr2	chr2	+	7108468	7109806	0	0.09	0	31.42	0	77.27	0.035	209.765	Fun	FBgn0039694	fig
MI770	chr2	chr2	-	7134676	7140603	3.565	4.16	5.075	9.61	10.27	10.875	12.255	6.215	Fun	FBgn0260990	yata
MI771	chr2	chr2	+	7140231	7141854	248.7	340.48	149.955	136.63	897.645	595.695	105.61	22.015	Fun	FBgn0020235	ATPsyngamma
MI772	chr2	chr2	-	7141829	7144072	16.39	18.12	20.935	27.38	28.525	11.65	37.6	6.67	Fun	FBgn0039691	IntS11
MI773	chr2	chr2	-	7144956	7147412	0	0.805	0.035	13.79	0.03	8.405	0.02	6.485	Dis	FBgn0261793	Trf2
MI774	chr2	chr2	+	7147760	7148767	11.985	12.855	27.46	51.005	16.34	93.695	83.55	280.66	Fun	FBgn0038675	CG6013
MI775	chr2	chr2	+	7158052	7161246	0.065	0.045	0.085	1.43	0	1.5	0	0.87	Fun	FBgn0038676	CG6026
MI776	chr2	chr2	-	7162235	7217287	3.825	4.275	9.82	29	8.79	57.11	16.215	60.65	Fun	FBgn0004876	cdi
MI777	chr2	chr2	-	7222634	7223301	22.725	27.15	26.18	29.435	64.56	20.695	241.93	32.565	Fun	FBgn0038678	mRpL55
MI778	chr2	chr2	+	7223818	7224932	422.665	605.42	263.56	282	1687.36	1219.55	351.92	201.925	Fun	FBgn0016120	ATPsynD
MI779	chr2	chr2	+	7231970	7266578	3.795	3.535	8.615	7.385	6.53	5.005	3.215	6.745	Fun	FBgn0038679	CG6040
MI780	chr2	chr2	+	7267022	7270287	145.84	143.05	2.935	5.665	38.17	20.515	0.36	3.135	Fun	FBgn0038681	Cyp12a4
MI781	chr2	chr2	-	7269664	7276802	0	0	0.07	0.18	0.06	0.2	0	0.07	Fun
MI782	chr2	chr2	-	7284284	7292126	1.98	2.69	7.015	5.815	10.375	4.33	12.295	1.98	Fun	FBgn0261285	Ppcs
MI783	chr2	chr2	-	7292353	7297419	17.625	15.825	23.585	25.535	36.44	19.28	6.85	2.47	Fun	FBgn0038682	CG5835
MI784	chr2	chr2	-	7298211	7301234	8.695	11.935	9.395	38.505	31.43	100.07	59.33	109.61	Fun	FBgn0038683	CG11779
MI785	chr2	chr2	+	7301294	7304101	0.015	0.075	0.015	1.085	9.095	1.365	131.575	2.31	Dis	FBgn0002962	nos
MI786	chr2	chr2	-	7303751	7306124	9.43	11.22	13.47	22.19	28.575	11.325	74.64	15.85	Fun	FBgn0259704	Nsun5
MI787	chr2	chr2	-	7307946	7317481	6.415	9.07	3.085	1.65	5.935	4.24	0.355	0	Fun	FBgn0262717	Skeletor
MI788	chr2	chr2	+	7320649	7323113	0.015	0.015	0	0	0	0	0	0	Sil
MI789	chr2	chr2	+	7323695	7326643	100.89	83.935	59.125	42.2	83.375	41.83	27.505	2.105	Fun	FBgn0037819	CG14688
MI790	chr2	chr2	+	7326968	7328934	9.31	8.005	20.56	33.27	14.215	74.625	0.845	181.025	Fun	FBgn0037818	CG6465
MI791	chr2	chr2	+	7329002	7330859	4.805	3.35	2.98	4.63	9.255	6.87	0	0.485	Fun	FBgn0037818	CG6465
MI792	chr2	chr2	+	7396246	7441222	7.55	8.49	90.29	49.52	8.145	5.425	0.15	0.555	Fun	FBgn0001235	hth
MI793	chr2	chr2	-	7459638	7468833	0	0.015	0.02	0.13	0.38	0.06	0.36	0.06	Sil
MI794	chr2	chr2	+	7587121	7621686	34.635	54.095	58.595	61.3	67.93	34.82	29.84	13.22	Fun	FBgn0024957	Irp-1B
MI795	chr2	chr2	-	7587846	7589881	79.22	81.385	2.135	2.26	56.03	23.33	9.795	1.435	Fun	FBgn0037817	Cyp12e1
MI796	chr2	chr2	-	7616154	7617144	6.025	6.505	14.805	24.965	34.445	10.47	53.115	9.46	Fun	FBgn0037815	Rrp46
MI797	chr2	chr2	-	7619664	7621865	0	0	0.15	0.065	9.015	0.185	37.06	0.155	Fun
MI798	chr2	chr2	+	7623194	7631340	6.855	7.895	14.35	55.73	11.24	32.8	22.06	23.545	Fun	FBgn0037814	CG6325
MI799	chr2	chr2	-	7633444	7635838	0	0	1.615	2.605	0.28	0.055	0	0.15	Fun	FBgn0045443	mthl11
MI800	chr2	chr2	-	7635979	7647777	5.69	5.88	9.385	18.64	12.22	80.315	2.75	83.365	Fun	FBgn0259938	cwo
MI801	chr2	chr2	+	7655411	7707715	1.58	2.59	8.015	34.3	6.395	31.915	14.15	43.395	Fun	FBgn0020379	Rfx
MI802	chr2	chr2	-	7672663	7677362	0	1.155	0	90.455	0	115.46	0	211.44	Fun
MI803	chr2	chr2	-	7676786	7710195	0	3.595	0.04	231.99	0	339.58	0	840.91	Fun
MI804	chr2	chr2	-	7710888	7723774	2.86	3.41	14.01	18.14	3.795	5.195	17.99	4.02	Fun	FBgn0015396	jumu
MI805	chr2	chr2	-	7727449	7731107	0.025	1.095	0.425	13.08	2.4	12.99	3.115	16.27	Dis	FBgn0000246	c(3)G
MI806	chr2	chr2	-	7732800	7738259	3.915	6.035	13.3	39.675	42.82	29.755	57.425	21.31	Dis	FBgn0037810	sle
MI807	chr2	chr2	+	7739757	7760250	4.325	5.64	8.215	27.15	9.64	27.395	7.065	16.165	Fun	FBgn0266717	Bruce
MI808	chr2	chr2	+	7761512	7765135	0.665	0.235	0.295	0.2	13.76	9.35	15.205	0.175	Fun	FBgn0037807	CG6293
MI809	chr2	chr2	-	7764378	7819310	3.81	4.76	4.27	12.085	12.32	16.11	13.81	10.385	Fun	FBgn0262617	Nuak
MI810	chr2	chr2	-	7819519	7821286	17.63	20.11	37.805	139.33	37.09	72.8	43.355	53.555	Fun	FBgn0040078	pont
MI811	chr2	chr2	+	7828794	7831271	0	0.035	1.5	1.2	0	0.085	0	0.08	Fun
MI812	chr2	chr2	-	7836595	7840158	46.31	33.085	72.72	112.16	22.275	17.16	0.015	7.92	Fun	FBgn0037801	CG3999
MI813	chr2	chr2	-	7840274	7859635	0.035	0.075	0.455	8.155	2.55	14.825	0	5.665	Fun	FBgn0261928	CG42795
MI814	chr2	chr2	-	7860851	7861609	0	0.41	1.565	43.635	0.315	175.835	0	279.655	Fun	FBgn0083943	CG34107
MI815	chr2	chr2	+	7860965	7862659	0.045	0.22	8.36	5.45	2.39	3.155	0.145	2.235	Fun	FBgn0037798	CG12817
MI816	chr2	chr2	-	7863974	7890537	0.515	0.65	3.48	1.665	5.67	5.805	0.21	1.33	Fun	FBgn0004575	Syn
MI817	chr2	chr2	+	7873406	7883602	10.895	10.65	11.065	10.415	47.345	27.8	12.775	15.395	Fun	FBgn0025879	Timp
MI818	chr2	chr2	+	7891262	7907884	9.075	9.8	23.325	17.82	21.375	15.69	0.82	0.665	Fun	FBgn0037796	CG12814
MI819	chr2	chr2	+	7909444	7917279	6.81	8.42	9.67	8.025	23.635	6.57	16.075	1.58	Fun	FBgn0040238	Best1
MI820	chr2	chr2	-	7917863	7918523	0	0.29	0	40.735	0	41.33	0	308.335	Fun
MI821	chr2	chr2	+	7923610	7925660	3.09	3.805	12.555	22.235	8.5	19.44	13.15	13.215	Fun	FBgn0037794	CG6254
MI822	chr2	chr2	-	7925619	7940614	1.975	2.065	10.89	7.39	17.35	9.9	7.53	5.65	Fun	FBgn0086359	Invadolysin
MI823	chr2	chr2	+	7931145	7931774	0	0.105	0	6.95	0	6.88	0	47.28	Fun
MI824	chr2	chr2	+	7941331	7943662	0	0.125	0.065	18.435	0.405	70.98	0	95.23	Fun	FBgn0061197	salto
MI825	chr2	chr2	-	7943652	7947137	3.55	4.25	8.125	16.1	7.03	9.16	17.85	12.105	Fun	FBgn0038491	CG5292
MI826	chr2	chr2	+	7946478	7951454	1.14	1.51	2.315	26.35	3.98	116.35	11.375	140.88	Fun	FBgn0038488	m-cup
MI827	chr2	chr2	-	7954817	7958248	24.47	21.525	86.915	107.16	5.045	5.465	0.155	5.475	Fun	FBgn0001321	knk
MI828	chr2	chr2	-	7959031	7962585	7.95	9.775	25.565	25.595	30.495	12.445	39.755	5.495	Dis	FBgn0004889	tws
MI829	chr2	chr2	-	7962642	7969246	9.05	14.66	13.84	31.055	39.475	20.65	69.6	10.765	Fun	FBgn0037792	TAF1B
MI830	chr2	chr2	-	7979656	7984186	0.68	0.78	3.895	4.065	9.2	5.155	4.575	2.595	Dis	FBgn0035842	Setx
MI831	chr2	chr2	-	7985519	8016054	1.895	2.58	13.545	11.96	6.61	6.435	8.435	3.26	Fun	FBgn0262127	kibra
MI832	chr2	chr2	+	8020561	8021184	0	0.11	0	14.74	0	16.075	0	97.76	Fun
MI833	chr2	chr2	-	8022222	8027239	2.675	3.165	4.125	8.665	28.95	19.62	32.1	16.385	Fun	FBgn0038256	CG7530
MI834	chr2	chr2	-	8035421	8046343	126.825	119.885	269.565	211.37	223.985	233.22	266.345	231.31	Fun
MI835	chr2	chr2	+	8046017	8115664	6.285	6.4	20.24	18.125	12.07	8.61	14.49	4.755	Dis	FBgn0263929	jvl
MI836	chr2	chr2	-	8053103	8054400	94.48	108.195	0.695	1.315	519.745	239.34	0.585	4.565	Fun	FBgn0038257	smp-30
MI837	chr2	chr2	+	8089728	8091205	1.15	1.225	17.165	9.68	0.81	0.785	0.915	0.375	Fun
MI838	chr2	chr2	+	8117568	8120267	1.07	0.755	1.37	0.27	1.68	1.63	0.015	1.325	Fun	FBgn0038260	CG14855
MI839	chr2	chr2	+	8121477	8123751	0.625	0.595	2.205	0.465	1.63	0.6	0.195	2.63	Fun	FBgn0038261	CG14856
MI840	chr2	chr2	-	8121833	8122517	0	0	0	0.265	0	1.82	0	2.8	Dis
MI841	chr2	chr2	+	8124654	8128757	4.695	4.82	0.395	0.755	3.5	2.645	0.055	0.45	Fun	FBgn0038262	CG14857
MI842	chr2	chr2	-	8130593	8135101	9.07	9.975	35.28	24.385	21.65	14.8	12.63	5.81	Dis	FBgn0266756	btsz
MI843	chr2	chr2	+	8209606	8212557	1.435	1.705	3.4	2.67	7.325	4.26	6.125	0.82	Fun	FBgn0038268	CG3631
MI844	chr2	chr2	-	8212285	8215893	4.875	5.055	10.42	31.11	16.975	49.59	21.85	54.375	Fun	FBgn0038269	Rrp6
MI845	chr2	chr2	+	8215516	8218570	7.63	7.49	11.02	14.88	13.97	15.115	58.215	24.175	Fun	FBgn0067628	CG33331
MI846	chr2	chr2	-	8218486	8219683	5.27	4.78	17.465	26.2	7.95	9.545	23.665	9.765	Fun	FBgn0004597	CycC
MI847	chr2	chr2	+	8219500	8221876	136.53	206.475	67.925	133.7	662.725	553.54	91.865	115.48	Fun	FBgn0038271	UQCR-C1
MI848	chr2	chr2	-	8221675	8223729	21.45	17.48	50.225	54.075	15.13	10.465	18.585	7.1	Fun	FBgn0038272	Dph2
MI849	chr2	chr2	+	8224012	8229989	7.57	9.925	26.885	27.705	18.32	8.84	43.71	4.045	Fun	FBgn0004227	nonA
MI850	chr2	chr2	-	8234835	8236888	0.015	0.075	3.28	1.91	0.015	0.035	0.02	0.33	Dis	FBgn0031373	CG15358
MI851	chr2	chr2	-	8237208	8239007	0	0.02	0.09	0.02	0	0	0.225	0.03	Sil	FBgn0262366	CG43064
MI852	chr2	chr2	+	8241937	8243317	70.67	61.79	112.585	128.335	55.965	78.94	76.445	52.23	Fun	FBgn0024432	Dlc90F
MI853	chr2	chr2	-	8243195	8244694	8.105	9.705	13.36	29.345	24.1	25.54	60.995	54.86	Fun	FBgn0038601	CG18600
MI854	chr2	chr2	-	8252649	8253205	0.95	3.09	0.755	0.235	213.91	120.18	3.195	5.205	Fun	FBgn0040582	BomBc3
MI855	chr2	chr2	+	8253971	8254951	17.715	17.065	22.115	20.295	116.61	68.735	0.685	3.025	Fun	FBgn0038930	BomT3
MI856	chr2	chr2	-	8256719	8261147	0	0	0.505	0.14	0.305	0.325	0	0	Sil	FBgn0038929	CG13408
MI857	chr2	chr2	+	8263488	8264355	7.085	7.335	12.095	16.325	25.015	14.795	281.17	48.055	Fun	FBgn0038234	mRpL11
MI858	chr2	chr2	-	8264276	8265312	8.55	9.015	13.775	27.525	30.4	29.65	87.68	44.22	Fun	FBgn0038235	CG8461
MI859	chr2	chr2	+	8269455	8278054	3.345	3.9	6.405	13.96	29.71	26.24	13.89	11.9	Fun	FBgn0039430	CG5455
MI860	chr2	chr2	-	8278348	8343827	0.905	1.38	5.95	4.145	2.255	0.92	0.875	0.725	Fun	FBgn0039431	plum
MI861	chr2	chr2	+	8293513	8294393	0	0	0	1.685	0	2.275	0	1.925	Fun
MI862	chr2	chr2	-	8296720	8297388	0	0	0	0	0.07	15.135	0	0.385	Dis
MI863	chr2	chr2	-	8344716	8349087	7.64	8.785	30.025	49.64	25.415	30.19	31.565	17.475	Fun	FBgn0039581	Moca-cyp
MI864	chr2	chr2	+	8348997	8352492	55.02	56.19	38.71	40.825	21.32	17.405	21.44	6.86	Fun	FBgn0039580	Gfat2
MI865	chr2	chr2	+	8355252	8374792	9.635	9.95	21.67	30.775	53.48	22.275	40.235	3.37	Fun	FBgn0261618	larp
MI866	chr2	chr2	+	8391988	8392324	0	0.25	0	17.55	0	111.68	0	851.125	Dis
MI867	chr2	chr2	+	8392703	8393638	0	0.615	0	82.125	0	250.34	0	492.57	Fun	FBgn0038925	Cchl
MI868	chr2	chr2	+	8394407	8395487	0	0	0	36.285	0	128.23	0	510.36	Fun	FBgn0039577	CG12516
MI869	chr2	chr2	-	8404036	8407918	0	0.96	0	184.645	0.01	632.03	0.05	970.125	Fun	FBgn0004171	Mst98Cb
MI870	chr2	chr2	-	8451298	8544759	0.21	0.275	5.925	3.125	1.295	1.42	0	0.01	Fun	FBgn0085383	CG34354
MI871	chr2	chr2	+	8559722	8589622	0	0	0	0	0	0	0	0	Sil
MI872	chr2	chr2	-	8604033	8646310	0.505	0.745	23.78	11.015	2.61	2.855	0.005	0.1	Fun	FBgn0085391	trv
MI873	chr2	chr2	+	8708667	8709694	0	0	0	0	0	277.65	0.1	4.895	Fun	FBgn0039568	CG4815
MI874	chr2	chr2	+	8711775	8735107	46.585	48.4	50.735	31.67	65.165	41.995	6.815	6.66	Fun	FBgn0003890	betaTub97EF
MI875	chr2	chr2	-	8736217	8740751	4.49	5.805	10.98	31.44	13.645	55.635	18.565	86.225	Fun	FBgn0039566	CG4849
MI876	chr2	chr2	+	8740919	8742047	0.03	0	0.04	0.705	0	0.195	0	0.6	Sil	FBgn0051253	CG31253
MI877	chr2	chr2	+	8742085	8744059	7.06	6.41	18.18	20.245	25.62	12.75	44.69	10.715	Fun	FBgn0259990	CG42487
MI878	chr2	chr2	-	8744030	8746617	3.985	4.005	4.225	2.875	2.89	0.775	0	0.31	Fun	FBgn0039564	Nep7
MI879	chr2	chr2	+	8746841	8750307	1.775	1.52	4.68	4.965	8.34	2.92	39.035	2.47	Dis	FBgn0039563	CG4951
MI880	chr2	chr2	-	8749042	8752329	169.795	196.925	283.19	274.35	126.065	327.205	99.155	176.47	Fun	FBgn0039562	Gp93
MI881	chr2	chr2	+	8757193	8763563	3.735	3.75	7.14	14.685	18.745	55.7	21.08	67.42	Fun	FBgn0039561	mfrn
MI882	chr2	chr2	-	8763504	8767654	4.415	5.66	13.915	22.78	10.445	11.3	14.765	5.61	Fun	FBgn0039560	BOD1
MI883	chr2	chr2	+	8768126	8773818	2.395	3.4	5.8	12.305	10.955	5.16	40.33	3.19	Fun	FBgn0039559	NSD
MI884	chr2	chr2	-	8773359	8780190	15.26	21.235	20.445	71.74	40.94	64.74	48.08	46.07	Fun	FBgn0027579	mino
MI885	chr2	chr2	+	8776663	8776912	0	0	0	0.385	0	0.91	1.87	0.695	Fun
MI886	chr2	chr2	+	8777419	8778744	0.305	0.12	0.25	0.275	5.38	0.515	30.43	0.72	Fun	FBgn0051053	nenya
MI887	chr2	chr2	-	8780461	8782478	1249.4	1306.78	1714.34	1437.94	1365.09	367.84	660.805	88.97	Fun	FBgn0003279	RpL4
MI888	chr2	chr2	+	8782684	8783894	14.635	14.59	39.205	50.555	22.055	21.985	26.79	19.245	Fun	FBgn0039558	BCAS2
MI889	chr2	chr2	-	8783658	8787424	3.8	3.31	15.83	13.1	8.685	12.305	8.11	8.615	Fun	FBgn0085433	CG34404
MI890	chr2	chr2	-	8787605	8789301	2.24	2.085	6.445	18.805	4.235	17.655	5.225	18.745	Fun	FBgn0039860	CG1792
MI891	chr2	chr2	+	8789191	8790337	3.955	5.215	10.63	11	7.72	4.53	12.325	2.845	Fun	FBgn0039859	CG11539
MI892	chr2	chr2	-	8789914	8794362	4.32	4.295	21.34	27.14	8.84	18.655	15.15	14.095	Fun	FBgn0011655	Med
MI893	chr2	chr2	+	8798320	8814161	163.76	177.925	335.55	274.795	171.85	87.795	147.675	34.41	Fun	FBgn0039858	CycG
MI894	chr2	chr2	-	8808741	8812850	0.065	0.08	3.91	2.1	0.1	1.71	0.105	1.69	Fun
MI895	chr2	chr2	+	8815070	8816709	1926.55	1942.01	2668.78	2440.81	1598.05	578.63	845.255	206.26	Fun	FBgn0039857	RpL6
MI896	chr2	chr2	-	8815559	8820702	3.3	3.655	4.995	13.645	11.64	12.745	4.745	6.355	Fun	FBgn0039854	CG1635
MI897	chr2	chr2	+	8820471	8821814	0.03	0.3	0	24.165	0.03	46.945	0.035	89.045	Fun	FBgn0037912	sea
MI898	chr2	chr2	-	8825944	8834478	1.77	2.36	4.99	20.04	1.79	10.885	7.71	8.855	Fun	FBgn0003268	rod
MI899	chr2	chr2	+	8834569	8839811	2.465	2.99	7.255	12.995	6.675	4.28	25.3	2.925	Fun	FBgn0043900	pygo
MI900	chr2	chr2	-	8840166	8843925	28.965	29.455	30.065	52.53	30.045	49.105	39.01	31.945	Fun	FBgn0028968	gammaCOP
MI901	chr2	chr2	+	8846441	8857324	1.825	1.94	4.835	6.69	5.345	4.21	10.565	2.495	Fun	FBgn0039466	CG5521
MI902	chr2	chr2	+	8860483	8866991	4.625	3.75	2.9	1.11	5.705	3.935	0.765	1.295	Fun	FBgn0039467	CG14253
MI903	chr2	chr2	-	8865623	8868940	956.65	757.17	563.885	489.42	194.245	70.46	165.065	76.53	Fun	FBgn0051075	CG31075
MI904	chr2	chr2	-	8869522	8870515	30.79	23.665	19.41	13.56	5.575	5.815	1.685	2.105	Fun	FBgn0051076	CG31076
MI905	chr2	chr2	+	8875678	8877231	0.025	0	0	0	0.05	0	0	0	Sil-Dis	FBgn0039469	TwdlC
MI906	chr2	chr2	+	8883594	8885222	0.05	0.05	0.025	0.025	28.965	19.275	0	0	Fun	FBgn0051077	CG31077
MI907	chr2	chr2	-	8885680	8887967	439.865	303.73	1.95	0.29	173.34	94.555	0.04	0.15	Fun	FBgn0039470	CG6296
MI908	chr2	chr2	+	8889880	8891146	0.03	0	0.33	1.895	0.03	2.095	0	1.915	Fun
MI909	chr2	chr2	-	8889989	8891143	2122.73	1785.82	7.21	1.34	196.915	103.395	0.085	0.665	Fun	FBgn0039475	CG6277
MI910	chr2	chr2	+	8907868	8913700	0.065	0	0.27	0.24	1.24	1.27	0	0.07	Fun	FBgn0004842	RYa-R
MI911	chr2	chr2	+	8930445	8932410	0.615	0.105	7.25	2.205	0.26	0.615	0	0.405	Fun	FBgn0029170	TwdlT
MI912	chr2	chr2	+	8939539	8940867	0.11	0.195	0.135	0.17	1.19	1.245	0.09	0.085	Fun	FBgn0004842	RYa-R
MI913	chr2	chr2	+	8944692	8945659	0	0	0.05	23.495	0	193.75	0	526.77	Fun	FBgn0085321	CG34292
MI914	chr2	chr2	-	8947451	8952546	3.615	4.45	4.155	8.4	16.71	4.455	26.355	1.11	Fun	FBgn0003495	spz
MI915	chr2	chr2	+	8947868	8948359	0	0	0	31.705	0	181.475	0	1461.54	Dis	FBgn0264563	CG43935
MI916	chr2	chr2	+	8958188	8965487	0.525	0.82	2.685	0.92	0.2	0.17	0.025	0	Fun	FBgn0039479	CG14257
MI917	chr2	chr2	+	8963511	8964998	0	0	0.555	1.025	0.075	3.805	0.03	3.52	Fun	FBgn0039479	CG14257
MI918	chr2	chr2	-	8966157	8969753	3.49	3	4.185	31.245	7.475	4.08	0.185	0.845	Fun	FBgn0039480	Cpr97Ea
MI919	chr2	chr2	-	8972533	8974020	3.88	3.14	9.45	52.34	46.38	22.275	1.985	4.41	Fun	FBgn0039481	Cpr97Eb
MI920	chr2	chr2	+	8975679	8976915	251.67	160.81	0.085	0	0.26	0.145	0	0.04	Fun	FBgn0039482	CG14258
MI921	chr2	chr2	+	8977054	8978542	1.1	1.03	0	0	19.48	13.085	0	0.065	Fun	FBgn0039483	CG14259
MI922	chr2	chr2	-	8978307	8983085	8.36	5.085	1.35	0.825	1.84	0.535	0.35	0.37	Fun	FBgn0243514	eater
MI923	chr2	chr2	+	8984557	8986002	2.43	1.47	0.685	0.66	28.295	25.84	0.055	0.415	Fun	FBgn0039485	CG17189
MI924	chr2	chr2	-	8985891	8990321	15.455	20.105	0.875	0.735	26.2	25.135	3.75	0.26	Fun	FBgn0039486	CAH9
MI925	chr2	chr2	-	8991286	8996462	9.265	10.49	19.85	24.28	13.23	5.685	55.685	7.5	Fun	FBgn0039487	gb
MI926	chr2	chr2	+	8996603	8998537	4.44	4.65	7.625	10.48	7.26	7.7	31.415	11.41	Fun	FBgn0039489	CG5880
MI927	chr2	chr2	-	9001565	9004685	0	0.09	0.015	49.52	0.01	131.1	0	120.45	Fun	FBgn0039491	CG6059
MI928	chr2	chr2	-	9005311	9030341	7.78	6.785	9.785	23.525	16.155	30.875	14.69	24.99	Fun	FBgn0039492	CG6051
MI929	chr2	chr2	-	9030545	9031852	3.775	4.285	12.28	14.28	7.965	5.53	9.58	6.665	Fun	FBgn0035159	CG13896
MI930	chr2	chr2	+	9032168	9038761	27.945	43.515	2.675	11.16	90.41	74.545	21.04	4.775	Fun	FBgn0029155	Men-b
MI931	chr2	chr2	+	9039244	9041043	52.67	46.785	74.335	49.41	15.255	8.64	0.375	0.52	Fun	FBgn0039494	grass
MI932	chr2	chr2	+	9042454	9044132	1.18	1.375	2.07	2.47	5.67	1.79	0.06	0.035	Fun	FBgn0039495	CG5909
MI933	chr2	chr2	-	9046964	9047527	21.205	20.265	22.14	20.54	44.63	23.425	64.54	16.86	Fun	FBgn0085322	CG34293
MI934	chr2	chr2	+	9047830	9049039	0.405	0.135	0.42	2.455	2.97	0.92	13.78	1.15	Fun	FBgn0003482	spn-D
MI935	chr2	chr2	-	9053512	9074594	1.855	1.66	14.605	7.42	0.35	0.275	0	0.02	Fun	FBgn0004197	Ser
MI936	chr2	chr2	-	9112382	9114661	21.485	20.115	12.33	26.69	29.91	95.635	25.285	312.875	Fun	FBgn0261995	CG42813
MI937	chr2	chr2	+	9114197	9117568	104.595	131.675	75.295	99.34	330.12	308.445	72.335	167.545	Fun	FBgn0039635	Pdhb
MI938	chr2	chr2	+	9117718	9120234	8.32	8.2	17.39	20.47	14.49	19.875	36.535	23.12	Fun	FBgn0039636	Atg14
MI939	chr2	chr2	-	9120024	9125161	1.78	2.015	5.605	10.805	7.205	4.94	17.755	3.505	Fun	FBgn0005596	yem
MI940	chr2	chr2	+	9123467	9133308	10.84	9.43	32.375	45.1	16.08	10.81	20.12	12.72	Fun	FBgn0039637	Ctl2
MI941	chr2	chr2	-	9127036	9131338	0.97	0.815	1.895	3.52	1.985	1.03	1.12	0.695	Dis
MI942	chr2	chr2	-	9131675	9134730	1.505	2.52	6.63	34.26	4.525	31.185	25.525	56.825	Fun	FBgn0039638	dgt6
MI943	chr2	chr2	+	9134957	9141962	24.26	26.295	30.08	33.865	32.615	28.69	25.765	11.885	Fun	FBgn0028671	Vha100-1
MI944	chr2	chr2	-	9141751	9142784	3.295	2.735	9.17	6.24	7.97	4.195	36.425	4.5	Fun	FBgn0039639	Alg13
MI945	chr2	chr2	+	9142691	9149881	3.23	2.415	1.93	3.3	45.87	2.085	110.375	0.49	Fun	FBgn0039640	superdeath
MI946	chr2	chr2	-	9149582	9151334	3.15	3.445	22.3	18.89	4.06	1.465	3.135	0.285	Fun	FBgn0039641	CG14511
MI947	chr2	chr2	-	9151695	9153717	6.35	6.01	70.715	70.56	9.13	30.42	25.25	34.315	Fun	FBgn0039642	CG11882
MI948	chr2	chr2	+	9153000	9154225	511.81	735.465	140.97	115.37	1036.11	716.94	69.635	18.85	Fun	FBgn0014869	Pglym78
MI949	chr2	chr2	-	9154116	9157602	6.2	8.53	11.31	31.455	18.115	20.89	79.355	30.965	Fun	FBgn0041588	eIF2D
MI950	chr2	chr2	-	9160595	9161524	0	0	0	13.09	0	79.19	0	494.98	Fun
MI951	chr2	chr2	-	9162162	9177107	3.68	1.78	22.685	13.15	1.225	0.695	0.03	1.15	Fun	FBgn0004644	hh
MI952	chr2	chr2	-	9186062	9194620	2.695	2.47	8.585	8.03	3.86	3.255	9.625	2.615	Fun	FBgn0004395	unk
MI953	chr2	chr2	+	9195729	9199389	4.375	5.69	10.305	12.1	8.63	2.51	11.92	1.485	Fun	FBgn0039508	CG3368
MI954	chr2	chr2	-	9199294	9200513	35.48	28.935	45.755	79.085	31.08	32.655	23.875	19	Fun	FBgn0039509	bigmax
MI955	chr2	chr2	+	9200791	9203339	72.425	70.7	114.8	81.44	59.225	35.865	39.165	12.55	Fun	FBgn0015737	Hmu
MI956	chr2	chr2	-	9203256	9204030	326.73	175.17	42.955	19.565	54.63	20.315	98.755	2.195	Fun	FBgn0040609	CG3348
MI957	chr2	chr2	-	9233939	9255691	0	0.04	0.01	22.535	0	52.105	0	73.345	Fun	FBgn0267433	kl-5
MI958	chr2	chr2	+	9260117	9289806	0.03	0.11	0.075	0.255	0.28	0.215	0.055	0.065	Sil	FBgn0260487	CG42534
MI959	chr2	chr2	-	9293039	9357261	0.205	0.23	4.11	2.695	1.34	1.385	0.03	0.11	Fun	FBgn0016061	side
MI960	chr2	chr2	+	9386207	9389218	0	0.02	0	27.46	0	36.37	0	36.78	Fun	FBgn0039010	CG4907
MI961	chr2	chr2	+	9393983	9395738	0	0.02	0	7.56	0	4.875	0	3.995	Fun	FBgn0033963	CG12857
MI962	chr2	chr2	+	9397287	9410581	0	0	0	0	0	0	0	0	Sil	FBgn0039520	Gr98a
MI963	chr2	chr2	-	9421359	9423405	110.285	169.61	0.57	0.4	0.08	0.15	0	0.195	Fun
MI964	chr2	chr2	-	9436529	9437904	0	0	0.475	0.28	0	0.03	0	0	Sil	FBgn0039522	CG13972
MI965	chr2	chr2	+	9442205	9445014	0.06	0.04	1.22	0.92	0.225	0.33	0	0.13	Dis	FBgn0039523	CG12885
MI966	chr2	chr2	-	9454956	9466536	7.83	6.885	19.72	13.255	15.69	8.82	14.59	2.52	Fun	FBgn0004387	Klp98A
MI967	chr2	chr2	-	9468057	9469646	0.035	0.075	0.31	0.03	8.385	6.815	0.365	0	Fun	FBgn0039525	CG5646
MI968	chr2	chr2	-	9470176	9497277	43.11	36.805	82.64	52.945	45.445	27.045	26.445	7.545	Fun	FBgn0027492	wdb
MI969	chr2	chr2	+	9492590	9496157	6.13	7.085	8.715	19.675	21.025	13.295	20.235	8.505	Fun	FBgn0010926	l(3)07882
MI970	chr2	chr2	+	9498096	9498975	4.64	4.83	17.345	26.765	24.48	12.76	309.625	44.52	Fun	FBgn0035955	CG5194
MI971	chr2	chr2	+	9500117	9502309	6.11	6.9	15.76	51.225	18.68	76.365	29.04	114.22	Fun	FBgn0038515	CG5823
MI972	chr2	chr2	-	9508720	9510679	0	0.02	0.02	9.085	0	30.535	0.02	48.18	Fun
MI973	chr2	chr2	+	9511828	9512255	0	0	0	1.475	0	2.765	0	10.905	Fun
MI974	chr2	chr2	+	9528367	9549611	0.09	0.095	2.465	1.81	0.555	0.645	0.025	0.1	Dis	FBgn0261046	Dscam3
MI975	chr2	chr2	+	9564689	9565159	0	0	0	8.29	0	43.4	0	111.785	Fun	FBgn0038512	CG14330
MI976	chr2	chr2	+	9572917	9573438	0	0	0	0.22	0	0.45	0.115	0.45	Sil-Dis
MI977	chr2	chr2	+	9576736	9579560	0	0	0	0.575	0	4.14	0	2.115	Dis
MI978	chr2	chr2	+	9586622	9588871	0.89	1.505	4.2	2.505	0.28	0.245	0	0	Fun	FBgn0000564	Eh
MI979	chr2	chr2	-	9589400	9611851	0.55	0.525	2.16	2.355	1.66	0.8	0.095	0.13	Fun	FBgn0038511	cysu
MI980	chr2	chr2	+	9601309	9601716	0	0	68.14	189.01	0	0	0	0.46	Fun	FBgn0264899	CG44090
MI981	chr2	chr2	+	9602880	9603552	3.68	0.69	6.73	29.035	0	1.1	0	1.14	Fun	FBgn0264899	CG44090
MI982	chr2	chr2	-	9615772	9616374	61.515	3.7	0.175	0.08	0	0.075	0	0.2	Fun
MI983	chr2	chr2	+	9617427	9618074	33.595	1.665	0	0.135	0	0	0	0	Fun
MI984	chr2	chr2	+	9618748	9621423	0	0.185	0	14.035	0	10.37	0	10.06	Fun	FBgn0052246	CG32246
MI985	chr2	chr2	-	9620959	9621835	190.53	63.385	0	0.35	0	0	0.12	0	Fun	FBgn0038508	CG5866
MI986	chr2	chr2	-	9622172	9623106	0.77	1.05	0	0	2.025	2.29	36.655	0.19	Fun	FBgn0038631	CG7695
MI987	chr2	chr2	-	9623608	9624291	1.2	1.875	0.38	0.245	0	0	7.925	0	Fun	FBgn0262004	CG42822
MI988	chr2	chr2	-	9624533	9625215	7.545	7	0	0	3.03	2.33	649.28	2.835	Dis	FBgn0262004	CG42822
MI989	chr2	chr2	-	9625376	9626886	6.685	3.905	0	0	0	0.075	0.265	1.07	Fun	FBgn0038507	CG5863
MI990	chr2	chr2	-	9627023	9630422	11.025	14.915	0.01	0.03	0	7.03	0.01	0.9	Fun	FBgn0038505	CG17283
MI991	chr2	chr2	-	9630800	9632024	2.49	1.14	4.45	13.645	0.03	1.71	0	0.56	Fun	FBgn0261932	CG42798
MI992	chr2	chr2	+	9631907	9634169	0.765	0.565	0.19	3.44	0.055	33.535	0.02	89.495	Fun	FBgn0262005	CG42823
MI993	chr2	chr2	+	9634222	9634973	89.29	92.505	1.2	2.405	0	0.3	0	0.1	Dis	FBgn0262005	CG42823
MI994	chr2	chr2	+	9636137	9637343	24.13	25.39	0	0.075	0	0	0	0	Fun	FBgn0262005	CG42823
MI995	chr2	chr2	+	9638510	9639224	116.47	63.42	0.09	11.25	0	68.585	0	308.885	Fun	FBgn0085308	CG34279
MI996	chr2	chr2	+	9639834	9651133	12	11.36	31.97	39.685	16.57	20.66	23.655	17.755	Fun	FBgn0038504	Sur-8
MI997	chr2	chr2	-	9651400	9654626	22.845	17.655	39.66	64.82	37.685	89.35	70.7	142.19	Fun	FBgn0028992	sds22
MI998	chr2	chr2	+	9651461	9652909	165.365	142.81	403.04	768.09	54.75	27.755	28.63	10.71	Fun	FBgn0025456	CREG
MI999	chr2	chr2	+	9654149	9673839	4.945	5.815	14.09	20.62	10.84	12.955	17.31	8.59	Fun	FBgn0038499	Brf
MI1000	chr2	chr2	-	9655927	9660233	11.26	12.285	21.53	22.975	22.085	14.9	17.155	5.065	Fun	FBgn0262871	lute
MI1001	chr2	chr2	+	9682635	9728589	0.295	0.23	7.73	3.92	1.89	1.965	0.015	0.03	Fun	FBgn0038498	beat-IIa
MI1002	chr2	chr2	-	9722570	9725168	0	0.57	0	22.405	0	24.63	0	22.4	Fun	FBgn0052707	APC4
MI1003	chr2	chr2	+	9746132	9746449	0	0	0	0.785	0	8.985	0	70.49	Fun
MI1004	chr2	chr2	+	9748797	9749508	0	0	0	0.92	0	1.745	0	20.85	Dis
MI1005	chr2	chr2	-	9761368	9762237	0	0	0	0.23	0	202.485	0	5	Fun	FBgn0051419	CG31419
MI1006	chr2	chr2	+	9779202	9810796	0.165	0.3	5.555	2.945	1.67	1.09	0.06	0.045	Fun	FBgn0038494	beat-IIb
MI1007	chr2	chr2	-	9811058	9812012	0	0	0	0	0	33.82	0	1.045	Dis	FBgn0050281	CG30281
MI1008	chr2	chr2	-	9824114	9825052	0	0	0.335	1.315	0	0.04	0	0	Dis
MI1009	chr2	chr2	+	9838017	9886233	1.18	0.67	48.915	32.635	0.085	1.825	0	1.66	Fun	FBgn0038492	Mur89F
MI1010	chr2	chr2	+	9886925	9894048	4.33	4.37	6.4	14.13	9.13	10.81	15.015	6.155	Fun	FBgn0038890	CG7956
MI1011	chr2	chr2	+	9897333	9969940	2.77	2.415	8.31	22.85	4.055	113.94	2.96	160.355	Fun	FBgn0003118	pnt
MI1012	chr2	chr2	+	9970565	9972506	0.04	0.215	0.04	58.83	0	185.04	0	207.99	Fun	FBgn0039070	wam
MI1013	chr2	chr2	-	9972975	9979320	2.145	2.43	6.045	10.05	6.02	7.605	10.135	6.275	Fun	FBgn0025781	Cdc16
MI1014	chr2	chr2	+	9980285	10007835	0.03	0.445	0.565	40.755	46.48	212.23	29.235	214.085	Fun	FBgn0264307	orb2
MI1015	chr2	chr2	-	9993881	10003444	0	0.11	0	20.9	0	10.18	0.075	13.325	Fun	FBgn0035640	mad2
MI1016	chr2	chr2	-	10007669	10009908	16.9	10.595	18.685	10.67	10.105	4.52	21.405	1.14	Fun	FBgn0039068	CG13827
MI1017	chr2	chr2	+	10010170	10013233	2.495	3.165	6.205	21.185	5.94	10.53	27.08	8.585	Fun	FBgn0039067	wda
MI1018	chr2	chr2	-	10012967	10017339	5.75	6.58	8.235	22.75	19.465	23.455	33.225	15.965	Fun	FBgn0039066	EloA
MI1019	chr2	chr2	+	10017844	10019749	2.975	2.845	14.385	72.8	5.38	86.59	50.975	87.075	Dis	FBgn0039065	Rad60
MI1020	chr2	chr2	+	10020122	10046876	0.26	0.315	2.665	2.03	4.415	4.395	0.035	0.485	Fun	FBgn0039064	CG4467
MI1021	chr2	chr2	+	10047829	10099203	38.575	35.525	22.935	25.67	34.825	15.145	51.71	7.02	Fun	FBgn0262975	cnc
MI1022	chr2	chr2	+	10077127	10079579	0.075	0.09	0	27.775	0.015	28.9	0	24.015	Fun	FBgn0011596	fzo
MI1023	chr2	chr2	-	10099948	10104292	14.585	13.475	9.215	6.8	41.175	14.26	74.19	5.89	Fun	FBgn0265042	Irk1
MI1024	chr2	chr2	+	10125998	10126815	0	0	0	34.69	0	28.92	0	35.525	Fun	FBgn0039059	CG13829
MI1025	chr2	chr2	+	10128766	10131271	0	0	0	14.585	0.075	16.77	0.11	18.085	Fun	FBgn0039058	VhaAC39-2
MI1026	chr2	chr2	+	10132969	10138344	4.095	4.03	13.12	12.6	6.2	6.94	5.13	4.075	Fun	FBgn0039507	mrt
MI1027	chr2	chr2	-	10137036	10140909	7.775	7.61	18.51	33.505	17.485	32.635	29.955	31.865	Fun	FBgn0046247	CG5938
MI1028	chr2	chr2	+	10141010	10149897	3.68	5.255	16.32	22.855	5.51	7.67	9.365	4.075	Dis	FBgn0002441	l(3)mbt
MI1029	chr2	chr2	-	10149199	10152163	18.325	18.455	33.98	74.315	31.23	163.475	57.75	244.74	Fun	FBgn0039504	CG14260
MI1030	chr2	chr2	+	10151097	10152277	0.065	0.225	0.46	31.365	0.135	154.99	0.305	787.305	Fun	FBgn0039503	CG14262
MI1031	chr2	chr2	+	10154789	10162954	6.085	6.47	16.825	20.365	14.87	7.9	26.275	3.76	Fun	FBgn0010328	woc
MI1032	chr2	chr2	+	10165859	10170837	1.37	1.395	3.125	37.815	1.92	142.67	3.605	176.455	Fun	FBgn0039501	TTLL6B
MI1033	chr2	chr2	+	10171374	10172660	0.525	1.215	0.485	0.355	2.3	2.485	0.455	1.335	Fun	FBgn0039500	CG5984
MI1034	chr2	chr2	+	10173143	10176151	10.16	7.82	55.58	35.975	13.005	12.895	5.635	10.725	Fun	FBgn0042111	CG18766
MI1035	chr2	chr2	-	10175011	10178733	1.36	1.755	2.09	4.915	3.635	2.87	14.685	2.705	Fun	FBgn0005696	PolA2
MI1036	chr2	chr2	+	10178186	10189180	7.575	7.735	13.04	15.585	11.035	10.42	21.595	6.09	Fun	FBgn0051064	CG31064
MI1037	chr2	chr2	-	10182216	10184920	0	0.015	0.015	28.22	0	29.565	0	23.235	Dis	FBgn0051068	CG31068
MI1038	chr2	chr2	+	10190029	10195684	2.245	2.185	8.515	7.905	6.76	6.645	6	3.485	Fun	FBgn0039634	alpha-Man-Ib
MI1039	chr2	chr2	-	10193457	10253977	19.28	18.145	79.845	58.66	28.705	31.01	31.685	43.11	Dis	FBgn0039633	CG11873
MI1040	chr2	chr2	-	10256078	10262568	1.87	0.865	0.515	4.9	1.345	3.14	2.6	4.65	Dis	FBgn0000119	arr
MI1041	chr2	chr2	+	10265654	10283182	0.105	0.08	0.28	0.26	0	0.035	0	0.03	Sil	FBgn0038339	CG6118
MI1042	chr2	chr2	+	10283344	10284381	0	0.055	0	2.62	0	10.6	0	15.19	Fun
MI1043	chr2	chr2	-	10287979	10296114	15.97	20.1	76.43	69.155	26.445	20.48	23.46	7.57	Fun	FBgn0041188	Atx2
MI1044	chr2	chr2	+	10297442	10302743	3.97	4.76	0.425	1.255	14.375	9.515	1.63	1.045	Fun	FBgn0038337	CG6125
MI1045	chr2	chr2	-	10302690	10326248	0.575	0.75	2.49	2.3	2.255	3.615	0	0.56	Fun	FBgn0262483	Rbp
MI1046	chr2	chr2	+	10327085	10328110	0	0.125	0	64.235	0	132.55	0	207.245	Fun	FBgn0038334	h-cup
MI1047	chr2	chr2	-	10335878	10338518	13.705	11.38	23.85	25.045	33.635	33.67	83.12	47.345	Fun	FBgn0038331	Ccm3
MI1048	chr2	chr2	+	10338393	10343152	1.32	1.005	5.065	13.825	2.005	62.945	2.265	101.415	Fun	FBgn0038330	CG14868
MI1049	chr2	chr2	+	10343357	10343914	25.65	20.965	37.34	26.335	32.8	21.325	52.17	14.65	Fun	FBgn0053977	Dpm3
MI1050	chr2	chr2	+	10345165	10348684	118.52	105.495	448.42	305.445	79.045	94.245	88.855	67.22	Fun	FBgn0038149	GILT1
MI1051	chr2	chr2	+	10350398	10356418	51.895	42.68	195.62	60.905	206.92	113.57	0.94	1.855	Fun	FBgn0038147	CCHa2
MI1052	chr2	chr2	+	10357300	10360804	4.325	5.655	4.41	11.485	22.67	4.96	18.975	2.835	Fun	FBgn0038146	CG9799
MI1053	chr2	chr2	-	10361136	10364057	74.405	77.09	172.87	213.095	234.09	282.645	371.24	233.84	Fun	FBgn0038145	Droj2
MI1054	chr2	chr2	+	10361193	10362858	0	0	1.835	0.82	0.135	0.02	0.03	0.085	Fun
MI1055	chr2	chr2	+	10364397	10365313	51.745	57.955	78.64	73.505	182.005	86.855	180.255	54.29	Fun	FBgn0044511	mRpS21
MI1056	chr2	chr2	+	10365657	10369841	0.645	1.07	11.085	11.21	21.03	20.625	0.44	2.865	Fun	FBgn0038143	CG9813
MI1057	chr2	chr2	+	10371241	10373613	1.775	1.745	0	0.025	4.03	0.305	0	0	Fun	FBgn0023495	Lip3
MI1058	chr2	chr2	-	10373309	10378548	19.12	21.835	4.54	2.145	35.03	11.225	46.255	0.235	Fun	FBgn0027610	Dic1
MI1059	chr2	chr2	+	10376054	10381442	49.9	46.385	92.69	86.585	73.345	43.925	248.755	83.99	Fun	FBgn0086371	poly
MI1060	chr2	chr2	-	10396445	10402377	0.075	0.18	0.32	0.155	0.135	0.195	0	0.155	Sil	FBgn0038140	PK2-R1
MI1061	chr2	chr2	+	10403308	10411658	1.41	0.91	0.175	0.18	0.315	0.205	0.035	0.05	Fun	FBgn0038139	PK2-R2
MI1062	chr2	chr2	-	10423643	10424108	0	0	0	0	1454.96	981.13	0	0	Fun	FBgn0264991	CG44142
MI1063	chr2	chr2	-	10427941	10435955	23.26	31.01	15.75	26.465	82.23	28.585	45.53	25.525	Fun	FBgn0052473	CG32473
MI1064	chr2	chr2	-	10436625	10437167	5.01	8.635	0	0	3.725	1.34	0	0	Fun	FBgn0262844	CG43208
MI1065	chr2	chr2	-	10438286	10442283	15.725	28.93	0.06	0.275	21.265	6.205	0	0.32	Fun	FBgn0038136	CG8774
MI1066	chr2	chr2	-	10442597	10446255	39.01	66.725	0	0.02	34.61	6.865	0.2	0.01	Fun	FBgn0038135	CG8773
MI1067	chr2	chr2	+	10447948	10449054	0.1	0.115	0	0.07	0.17	0	0.04	0	Sil	FBgn0038134	wntD
MI1068	chr2	chr2	-	10449609	10451266	0.07	0	4.9	0.135	1.685	0	0	0	Fun	FBgn0038133	Osi22
MI1069	chr2	chr2	+	10452918	10453981	0.04	0.045	0.135	0.395	0.04	0	0.175	0	Sil	FBgn0038132	apn
MI1070	chr2	chr2	+	10454778	10456543	0.025	0	0.125	0.145	0	0.025	0	0	Sil	FBgn0038131	CG15888
MI1071	chr2	chr2	-	10456877	10462125	4.675	8.085	3.36	4.985	11.115	123.125	0.775	0.9	Fun	FBgn0038130	CG8630
MI1072	chr2	chr2	+	10472459	10476515	12.705	12.3	22.75	25.64	11.85	12.185	21.06	12.485	Fun	FBgn0265190	PIG-S
MI1073	chr2	chr2	+	10484265	10493283	0.375	0.245	5.23	3.29	3.54	2.92	0	0.365	Fun	FBgn0040601	CG13643
MI1074	chr2	chr2	-	10487874	10489628	0	0.045	0	36.085	0.04	135.32	0	160.195	Fun	FBgn0039246	CG10845
MI1075	chr2	chr2	-	10493170	10496473	2.745	2.5	31.555	16.155	2.015	1.83	1.7	0.21	Fun	FBgn0039244	CG11069
MI1076	chr2	chr2	+	10493422	10496302	0.025	0.015	0.07	3.105	0.515	12.1	0.395	9.09	Fun
MI1077	chr2	chr2	+	10496356	10509071	3.045	2.77	28.39	14.685	2.31	2.15	1.47	0.85	Fun	FBgn0051121	CG31121
MI1078	chr2	chr2	-	10508874	10516865	310.525	253.5	190.685	129.945	91.07	46.465	22.16	5.67	Fun	FBgn0039241	CG11089
MI1079	chr2	chr2	+	10517197	10519027	71.59	70.695	153.24	73.52	74.15	25.825	36.93	11.525	Fun	FBgn0037537	CG2767
MI1080	chr2	chr2	+	10522774	10524286	10.575	8.595	32.055	37.865	10.66	23.5	26.78	72.775	Fun	FBgn0266598	Kmn2
MI1081	chr2	chr2	-	10523570	10524988	2.625	2.365	4.73	7.05	5.295	3.235	18.4	4	Fun	FBgn0037535	PIG-H
MI1082	chr2	chr2	+	10524834	10534660	7.375	8.135	28.43	31.72	17.32	19.53	17.095	12.285	Fun	FBgn0024555	flfl
MI1083	chr2	chr2	+	10534825	10536061	0	0.04	3.415	0.64	1.14	1.21	0	0.135	Fun	FBgn0038170	CG14367
MI1084	chr2	chr2	-	10536256	10541777	2.19	2.69	2.325	35.1	7.38	191.17	9.15	245.455	Dis	FBgn0028487	f-cup
MI1085	chr2	chr2	+	10541138	10544077	0.08	0.105	2.42	1.905	11.965	8.22	0	0.435	Fun	FBgn0002937	ninaB
MI1086	chr2	chr2	-	10543949	10545886	22.185	19.18	1.71	1.125	23.88	9.485	1.55	1.05	Fun	FBgn0038172	Adgf-D
MI1087	chr2	chr2	+	10547747	10549844	0.455	0.565	0	0.375	2.75	0.375	0.055	0.235	Fun	FBgn0038173	Adgf-C
MI1088	chr2	chr2	-	10549726	10552535	15.37	13.585	17.4	19.365	19.595	20.645	29.78	35.035	Fun	FBgn0040077	primo-1
MI1089	chr2	chr2	+	10555640	10603557	0.955	0.89	6.11	4.245	5.18	4.235	2.125	0.39	Fun	FBgn0085412	kmr
MI1090	chr2	chr2	-	10558313	10559143	0	0.36	0	70.185	0.055	277.945	0	758.545	Fun	FBgn0267383	Ubc87F
MI1091	chr2	chr2	+	10603866	10605364	31.125	26.12	45.795	103.44	3.08	1.87	0.04	0.83	Fun	FBgn0038179	CG9312
MI1092	chr2	chr2	+	10605751	10608567	2.745	1.955	277.915	205.7	0.965	1.325	0.095	0.375	Fun	FBgn0038180	Cht5
MI1093	chr2	chr2	-	10606634	10608554	0	0	2.57	0.665	0	0.025	0	0	Dis
MI1094	chr2	chr2	+	10609221	10616914	101.555	188.725	0.085	0.1	298.555	329.76	0.37	0.115	Fun	FBgn0038181	CG9297
MI1095	chr2	chr2	-	10612314	10613544	0.42	1.685	0.06	0	0.105	1.845	0	0	Fun
MI1096	chr2	chr2	+	10618336	10621494	2.39	2.845	3.15	5.53	5.185	3.305	4.71	1.605	Fun	FBgn0039588	mIF2
MI1097	chr2	chr2	+	10622526	10644331	7.99	6.315	7.94	4.945	20.25	3.415	3.57	0.645	Fun	FBgn0003137	Ppn
MI1098	chr2	chr2	+	10644482	10645592	0.46	0.475	11.5	6.625	1.55	1.375	0	0.2	Fun	FBgn0051051	CG31051
MI1099	chr2	chr2	-	10645513	10680179	0	0.005	0.03	6.625	0.005	8.405	0	4.74	Fun	FBgn0013813	Dhc98D
MI1100	chr2	chr2	-	10693550	10762561	0.345	0.27	9.88	4.665	2.075	1.72	0.665	0.055	Fun	FBgn0039584	beat-VI
MI1101	chr2	chr2	-	10799802	10800939	0	0	0	0.165	0	1.715	0	2.11	Fun
MI1102	chr2	chr2	-	10828764	10831753	0	0	0.025	0.025	0	0.075	0	0	Sil	FBgn0039582	Or98b
MI1103	chr2	chr2	+	10840731	10842706	0.02	0.02	0	16.635	0.02	107.145	0	153.435	Fun	FBgn0260461	Rcd7
MI1104	chr2	chr2	+	10843784	10867328	8.865	9.175	50.57	34.145	16.695	13.805	12.385	6.48	Dis	FBgn0263289	scrib
MI1105	chr2	chr2	+	10929244	10930697	0.055	0.23	0.565	0.105	0.16	0.055	0.105	0.035	Sil	FBgn0039434	TwdlM
MI1106	chr2	chr2	-	10930945	10931722	14.25	27.665	0.06	0	0	0	0	0	Fun	FBgn0039435	TwdlP
MI1107	chr2	chr2	-	10932828	10933923	0	0	0	0.075	0	0	0	0	Sil	FBgn0039434	TwdlM
MI1108	chr2	chr2	-	10935092	10936303	0.035	0.075	0	0.065	0	0	0	0	Sil	FBgn0039434	TwdlM
MI1109	chr2	chr2	-	10936581	10937413	0	0	0.055	0	0	0	0	0	Sil	FBgn0039438	TwdlO
MI1110	chr2	chr2	-	10938614	10939563	0	0	0	0.04	0	0	0	0	Sil	FBgn0039439	TwdlK
MI1111	chr2	chr2	+	10940674	10941899	0	0.035	0	0.03	0	0	0	0	Sil	FBgn0039440	TwdlJ
MI1112	chr2	chr2	+	10942824	10943975	0.035	0.105	0.56	0.225	0.03	0	0	0	Sil	FBgn0039441	TwdlN
MI1113	chr2	chr2	+	10944584	10947573	0.015	0.03	0	0	0	0	0	0	Sil	FBgn0051081	TwdlR
MI1114	chr2	chr2	+	10948414	10949357	0	0	0.465	0.625	0	0.315	0	0.13	Sil	FBgn0039443	TwdlS
MI1115	chr2	chr2	+	10951864	10952883	0	0	0	0.045	0.46	0.49	0	0.115	Sil	FBgn0039444	TwdlD
MI1116	chr2	chr2	-	10961449	10967703	0.11	0	0.3	0.215	0.455	0.31	0	0.055	Sil-Dis	FBgn0250908	beat-VII
MI1117	chr2	chr2	+	10968954	10970117	0.035	0.04	0	0	0.035	0.035	0.135	0	Sil	FBgn0243586	Tb
MI1118	chr2	chr2	-	10973670	10997363	0.055	0.04	0.16	0.07	0.255	0.155	0	0.015	Sil-Dis	FBgn0250908	beat-VII
MI1119	chr2	chr2	+	11000035	11000761	0	0	0	0	0	0	0	0	Sil-Dis
MI1120	chr2	chr2	-	11010503	11013941	0	0	0.18	0.545	0	0	0	0	Sil	FBgn0039448	TwdlQ
MI1121	chr2	chr2	-	11015980	11033772	1.385	1.225	3.06	2.36	5.235	4.835	0.03	0.365	Fun	FBgn0023179	amon
MI1122	chr2	chr2	-	11034581	11036508	1.1	2.25	5.245	16.4	3.365	6.15	18.93	5.99	Fun	FBgn0039449	CG6425
MI1123	chr2	chr2	+	11037143	11039450	17.56	20.255	21.91	45.05	23.845	29.04	45.11	22.12	Fun	FBgn0039450	Yif1
MI1124	chr2	chr2	-	11039345	11045529	3.07	3.465	5.995	10.025	10.32	13.39	15.515	8.325	Fun	FBgn0039451	CG6420
MI1125	chr2	chr2	+	11046905	11048974	4.36	4.65	3.955	21.455	12.81	20.765	19.22	15.33	Fun	FBgn0038649	PGS1
MI1126	chr2	chr2	+	11049189	11059189	5.41	6.48	11.695	17.965	12.625	9.325	16.975	5.335	Fun	FBgn0024329	Mekk1
MI1127	chr2	chr2	-	11059139	11059648	986.235	1433.87	0.715	1.42	0	0.255	0	0	Fun	FBgn0038647	CG14302
MI1128	chr2	chr2	-	11059915	11067075	0.65	0.76	5.59	3.46	7.065	7.205	0	0.82	Fun	FBgn0000303	ChAT
MI1129	chr2	chr2	+	11063783	11064729	404.12	590.01	0.215	0.095	0.05	0	0	0	Dis	FBgn0038646	CG7715
MI1130	chr2	chr2	+	11065512	11066605	800.725	463.66	0.09	0.12	0	0.04	0	0.145	Fun	FBgn0038645	CG7714
MI1131	chr2	chr2	-	11094207	11094828	2826.3	3018.63	0.775	0.33	15.21	2.97	0	0	Fun	FBgn0085311	CG34282
MI1132	chr2	chr2	+	11096367	11097031	1614.67	1693.29	0.705	0.29	7.87	4.485	0	0	Fun	FBgn0038643	CG14300
MI1133	chr2	chr2	+	11098062	11102199	0.02	0.045	0.095	0	0	0.035	0	0	Sil	FBgn0038642	Muc91C
MI1134	chr2	chr2	-	11103029	11109124	0.385	0.38	1.31	0.515	2.62	2.73	0	0	Fun	FBgn0038641	ChT
MI1135	chr2	chr2	-	11109442	11112183	3.125	3.62	8.365	11.775	6.715	4.49	10.97	2.395	Fun	FBgn0038640	CG7706
MI1136	chr2	chr2	+	11112287	11120112	0.475	0.835	2.9	6.775	1.72	2.68	4.755	1.835	Fun	FBgn0002905	PolQ
MI1137	chr2	chr2	-	11119325	11120151	54.015	46.55	95.14	86.585	62.595	108.95	145.6	364.805	Fun	FBgn0038080	CG12279
MI1138	chr2	chr2	-	11120573	11121789	0.145	1.415	0.08	22.325	0.035	15.59	0	89.145	Fun
MI1139	chr2	chr2	-	11122688	11130668	28.235	33.095	27.555	49.56	45.5	69.06	38.505	51.165	Fun	FBgn0016693	Past1
MI1140	chr2	chr2	-	11130743	11131971	5.205	2.91	2.045	2.665	7.735	5.185	10.65	3.67	Fun	FBgn0038079	NijC
MI1141	chr2	chr2	-	11133063	11135634	56.305	54.925	103.365	92.82	59.765	36.105	83.21	25.075	Fun	FBgn0011745	Arp1
MI1142	chr2	chr2	+	11135647	11137458	10.71	10.885	24.82	27.03	9.53	10.07	19.77	9.35	Dis	FBgn0005355	Su(fu)
MI1143	chr2	chr2	+	11137838	11145807	0.745	0.895	4.175	2.22	12.565	4.095	5.325	0.265	Fun	FBgn0001296	kar
MI1144	chr2	chr2	-	11149732	11173140	0.575	0.54	3.83	3.675	0.6	1.04	0	0.065	Fun	FBgn0008651	lbl
MI1145	chr2	chr2	-	11180933	11186334	0	0	0.04	0.025	0.01	0	0	0	Sil-Dis	FBgn0011278	lbe
MI1146	chr2	chr2	+	11204629	11205996	19.41	26.62	0.03	0.025	0	0	0	0	Fun	FBgn0029172	Fad2
MI1147	chr2	chr2	-	11220288	11220954	0	0.33	0	43.635	0	62.195	0	126.625	Fun	FBgn0036090	CG8009
MI1148	chr2	chr2	+	11226709	11231816	3.72	3.075	7.365	13.905	8.985	17.36	13.17	10.82	Fun	FBgn0038889	Fancm
MI1149	chr2	chr2	+	11243171	11255801	0.525	0.525	7.37	6.08	0.295	0.175	0	0	Fun	FBgn0004863	C15
MI1150	chr2	chr2	-	11268432	11270987	0.045	0.095	0.04	8.145	0.04	26.785	0.02	35.5	Fun
MI1151	chr2	chr2	+	11269240	11270764	0	0	0	0.47	0	1.155	0	1.44	Dis
MI1152	chr2	chr2	+	11271519	11274592	40	39.465	27.91	31.8	43.91	26.4	48.715	13.02	Fun	FBgn0020249	stck
MI1153	chr2	chr2	-	11274570	11277407	9.415	9.34	15.845	39.525	16.395	32.68	35.605	38.6	Dis	FBgn0037583	CG9684
MI1154	chr2	chr2	+	11278860	11309567	0.62	0.725	3.47	4.82	5.33	2.96	9.135	1.105	Fun	FBgn0264324	spg
MI1155	chr2	chr2	-	11289979	11295890	33.6	27.465	202.67	97.44	32.97	22.35	10.87	8.215	Fun	FBgn0265274	Inx3
MI1156	chr2	chr2	+	11290299	11292121	0.02	0.05	2.825	0.48	0.045	0	0.025	0.03	Fun
MI1157	chr2	chr2	-	11309777	11322653	0.065	0.055	1.045	0.61	2.025	1.935	0.315	0.375	Fun	FBgn0053203	CG33203
MI1158	chr2	chr2	-	11312632	11316688	1.655	2.605	39.785	45.2	2.02	5.48	3.04	5.44	Fun	FBgn0039612	Nepl19
MI1159	chr2	chr2	+	11317680	11320492	57.235	55.325	84.5	67.085	17.8	11.15	0.165	5.6	Fun	FBgn0027578	Nepl21
MI1160	chr2	chr2	+	11324982	11365128	9.18	11.095	32.385	38.475	94.615	74.255	34.69	12.665	Dis	FBgn0265998	Doa
MI1161	chr2	chr2	-	11365815	11398406	1.175	1.315	4.055	11.98	4.18	24.655	4.215	43.81	Fun	FBgn0016754	sba
MI1162	chr2	chr2	+	11399415	11401624	5.65	6.47	12.395	47.615	11.445	42.275	21.515	40.575	Fun	FBgn0039125	Ndc1
MI1163	chr2	chr2	-	11401548	11404208	3.61	3.495	5.845	15.49	9.255	37.585	8.665	50.18	Fun	FBgn0039126	CG13601
MI1164	chr2	chr2	+	11405735	11411957	114.35	197.39	74.05	81.41	406.855	371.245	72.045	190.78	Fun	FBgn0267385	PyK
MI1165	chr2	chr2	+	11412624	11424388	1.07	1.205	3.82	40.48	5.985	256.955	5.68	285.57	Fun	FBgn0263048	Gpdh3
MI1166	chr2	chr2	-	11424158	11426166	0.285	0.135	0.17	0	15.65	0.13	0	0.055	Fun	FBgn0038956	CAH8
MI1167	chr2	chr2	+	11427000	11430295	0.73	0.85	2.7	4.925	20.82	26.85	1.75	26.45	Fun	FBgn0038957	CG7059
MI1168	chr2	chr2	-	11430254	11432673	0.02	0.045	26.98	3.11	0.045	0	0	0.125	Fun	FBgn0038958	CG13857
MI1169	chr2	chr2	+	11441195	11443779	0.21	0.07	17.245	5.745	2.475	2.515	0	0.07	Fun	FBgn0038959	CG13856
MI1170	chr2	chr2	+	11444273	11447444	0	0.05	0.1	14.76	0.03	52.225	0	60.25	Fun	FBgn0038960	CG13855
MI1171	chr2	chr2	-	11447378	11450411	6.505	8.18	9.085	33.11	27.47	36.79	31.875	54.545	Fun	FBgn0038961	CG13850
MI1172	chr2	chr2	+	11449707	11458160	16.05	15.64	17.485	15.76	18.74	20.185	34.65	19.265	Fun	FBgn0261279	lqfR
MI1173	chr2	chr2	-	11458114	11460238	24.435	28.055	28.635	44.61	191.305	15.66	261.12	16.005	Fun	FBgn0038964	Nop56
MI1174	chr2	chr2	+	11460299	11463887	1.635	2.17	3.68	5.77	2.78	1.84	7.18	0.86	Fun	FBgn0036038	defl
MI1175	chr2	chr2	+	11464104	11466284	10.995	8.7	31.18	37.945	20.875	20.915	39.975	22.085	Fun	FBgn0038965	mats
MI1176	chr2	chr2	-	11465807	11468002	17.855	11.45	3.54	10.41	10.595	14.17	20.825	18.06	Fun	FBgn0038966	pinta
MI1177	chr2	chr2	+	11468169	11468495	0.36	0.875	0	0.33	45.785	75.305	0	2.515	Dis
MI1178	chr2	chr2	-	11468542	11480263	1.425	1.59	1.245	0.395	0.09	0.03	0	0.245	Fun	FBgn0038967	CG13847
MI1179	chr2	chr2	-	11484723	11491247	2.425	3.53	3.54	3.59	12.695	1.13	9.605	0.32	Fun	FBgn0038968	CG12499
MI1180	chr2	chr2	-	11491830	11499726	28.295	23.27	7.765	4.765	20.115	7.63	0	0.175	Fun	FBgn0085317	CG34288
MI1181	chr2	chr2	+	11492812	11505536	8.685	7.865	15.185	12.09	20.645	9.715	9.575	2.22	Fun	FBgn0085405	CG34376
MI1182	chr2	chr2	+	11497183	11497790	0.225	0	0	1.845	0.605	1.695	0	1.305	Fun	FBgn0033663	ERp60
MI1183	chr2	chr2	-	11505388	11506866	99.16	84.685	94.35	122.54	75.97	63.125	101.535	53.76	Fun	FBgn0028688	Rpn7
MI1184	chr2	chr2	+	11506741	11509337	27.125	25.41	52.705	59.08	41.18	40	60.765	27.465	Fun	FBgn0263351	AP-2mu
MI1185	chr2	chr2	+	11510971	11511714	871.67	974.065	174.565	49.62	1401.11	351.245	0.16	0.075	Fun	FBgn0038973	Pebp1
MI1186	chr2	chr2	-	11511440	11513064	16.205	19.95	14.795	10.695	32.31	14.385	23.125	2.465	Fun	FBgn0038974	CG5377
MI1187	chr2	chr2	+	11514064	11532837	0.175	0.11	3.43	1.83	3.485	2.94	0.005	0.025	Fun	FBgn0038975	Nrx-1
MI1188	chr2	chr2	+	11533959	11534876	78.85	81.275	150.225	164.955	118.34	87.59	187.65	84.605	Fun	FBgn0038976	Pfdn5
MI1189	chr2	chr2	-	11534744	11535845	2.965	4.96	1.94	6.065	11.505	13.715	0.55	5.335	Fun	FBgn0038977	CG5376
MI1190	chr2	chr2	-	11535925	11538321	71.175	81.565	134.195	229.51	169.93	63.53	254.335	60.275	Fun	FBgn0003676	CCT1
MI1191	chr2	chr2	-	11539133	11556869	2.05	2.365	5.46	10.845	5.54	8.975	11.61	6.86	Dis	FBgn0015589	Apc
MI1192	chr2	chr2	+	11539296	11540856	0.065	0.05	2.04	1.115	0.54	0.205	0.315	2.05	Fun
MI1193	chr2	chr2	+	11562097	11564630	0	0	0.09	2.905	0.045	15.88	0	31.11	Fun
MI1194	chr2	chr2	-	11562986	11564178	0	0	0	0.16	0	0.875	0	5.525	Dis
MI1195	chr2	chr2	+	11583230	11583661	0.16	0	0.39	0.485	423.2	0.16	0	0	Fun
MI1196	chr2	chr2	-	11583563	11584588	0	0	0	8.815	0	13.99	0	42.63	Fun	FBgn0038186	CG14362
MI1197	chr2	chr2	-	11596957	11604979	1.1	1.005	7.855	5.79	0.41	0.32	0	0.12	Fun	FBgn0008646	E5
MI1198	chr2	chr2	+	11632164	11634877	1.365	1.54	12.255	6.82	0.4	0.295	0.015	0.12	Fun	FBgn0000576	ems
MI1199	chr2	chr2	-	11673238	11674973	0	0.36	0	80.505	0	122.92	0.025	113.565	Dis	FBgn0038188	Art9
MI1200	chr2	chr2	-	11676054	11677462	0	1.28	0	36.25	0	24.11	0	29.205	Fun	FBgn0038189	Art6
MI1201	chr2	chr2	-	11681336	11682021	0	1.89	0	8.69	0	2.86	0	19.355	Fun	FBgn0038190	CG9926
MI1202	chr2	chr2	+	11690222	11691627	5.5	7.17	16.415	42.885	19.47	28.645	51	28.55	Fun	FBgn0016672	Ipp
MI1203	chr2	chr2	-	11691357	11695275	0.01	2.575	0.17	16.66	42.76	9.835	67.78	8.44	Dis	FBgn0038191	CG9925
MI1204	chr2	chr2	+	11695532	11698200	0.97	1.355	2.34	9.345	3.05	4.81	25.66	6.29	Fun	FBgn0015270	Orc2
MI1205	chr2	chr2	-	11697646	11714183	13.87	12	37.57	22.675	107.915	14.895	293.035	3.305	Dis	FBgn0264493	rdx
MI1206	chr2	chr2	+	11754821	11769538	96.85	122.735	43.705	29.805	68.215	41.84	0.22	8.99	Fun	FBgn0038194	Cyp6d5
MI1207	chr2	chr2	+	11770842	11773259	18.185	19.205	29.245	81.54	42.27	107.755	27.1	85.77	Fun	FBgn0038195	CG3061
MI1208	chr2	chr2	-	11773424	11776619	35.105	38.715	58.91	84.11	74.135	150.86	79.025	287.72	Fun	FBgn0038196	CG9922
MI1209	chr2	chr2	+	11798967	11836934	11.325	10.88	10.085	7.405	36.13	16.145	26.73	2	Fun	FBgn0038197	foxo
MI1210	chr2	chr2	-	11837219	11838103	0.21	0.11	14.85	0.095	0.705	0.11	0.375	0.26	Fun	FBgn0012042	AttA
MI1211	chr2	chr2	+	11839797	11842367	26.3	30.65	53.85	54.345	67.975	65.2	4.26	1.415	Fun	FBgn0038198	Npc2b
MI1212	chr2	chr2	-	11842044	11846293	0.845	0.85	0.26	0.175	1.32	1.385	0.035	0.145	Fun	FBgn0038199	CCHa1
MI1213	chr2	chr2	-	11846854	11848611	0	0.415	0.025	231.965	0	370.39	0	838.66	Fun	FBgn0038200	CG9920
MI1214	chr2	chr2	+	11847010	11847559	0	0	0	1.895	0	0	0	0.23	Dis
MI1215	chr2	chr2	-	11850445	11853019	0.405	0.335	0.035	0.045	0.22	0.1	0	0.1	Sil	FBgn0038201	PK1-R
MI1216	chr2	chr2	+	11853211	11861623	0	0	0	0.345	0.04	3.325	0.09	8.05	Fun	FBgn0038203	Or88a
MI1217	chr2	chr2	-	11854207	11857996	0.47	0.665	15.855	10.23	2.295	3.585	0.155	1.05	Fun	FBgn0038202	CG12402
MI1218	chr2	chr2	-	11861665	11864519	0.065	0.07	0.265	0.37	0.235	0.56	0.18	0.3	Sil	FBgn0038205	Kif19A
MI1219	chr2	chr2	-	11868545	11871951	7.735	7.665	26.905	22.34	13.875	7.95	21.235	4.98	Fun	FBgn0020510	Abi
MI1220	chr2	chr2	+	11871991	11873595	19.245	20.455	37.565	70.935	15.385	74.905	28.585	74.075	Fun	FBgn0038206	twf
MI1221	chr2	chr2	-	11873346	11874761	4.645	4.96	6.3	9.425	12.22	11.47	12.155	12.105	Fun	FBgn0010340	140up
MI1222	chr2	chr2	+	11874669	11879006	14.715	16.39	40.06	40.12	21.02	16.61	32.47	10.56	Fun	FBgn0262955	RpII140
MI1223	chr2	chr2	-	11879865	11881277	5.075	6.825	0.465	0.845	9.055	2.4	2.575	0.065	Fun	FBgn0038207	CG14356
MI1224	chr2	chr2	-	11889827	11891326	0.055	0.465	0	49.475	0	44.17	0	98.345	Fun	FBgn0013305	Nmda1
MI1225	chr2	chr2	+	11891543	11892220	0	1.12	0.09	3.985	0.075	1.63	0.095	8.865	Fun	FBgn0013347	TfIIA-S
MI1226	chr2	chr2	-	11903062	11912641	0	0.09	0.01	38.69	0.015	211.595	0.015	239.9	Fun	FBgn0051533	CG31533
MI1227	chr2	chr2	-	11913810	11916518	0	0.03	0	20.045	0	70.11	0	83.28	Dis	FBgn0051327	CG31327
MI1228	chr2	chr2	-	11920696	11925003	0.095	0.11	1.58	0.685	0.26	0.31	0	0.07	Fun
MI1229	chr2	chr2	-	11956423	11958708	0.415	1.025	0.095	0.04	6.52	2.615	0	0.375	Fun	FBgn0038211	CG9649
MI1230	chr2	chr2	-	11959119	11961308	0	0.13	0.09	0.115	15.87	6.675	0.075	2.56	Dis	FBgn0051326	CG31326
MI1231	chr2	chr2	-	11961532	11963231	0.125	0.275	0	0	63.02	47.905	0	0	Fun	FBgn0053109	CG33109
MI1232	chr2	chr2	-	11963496	11965450	4.695	7.22	3.73	5.35	3.095	2.37	0	0.145	Fun	FBgn0053329	Sp212
MI1233	chr2	chr2	-	11965930	11967648	9.4	7.205	4.86	2.225	16.215	7.455	0.09	0.525	Fun	FBgn0027563	CG9631
MI1234	chr2	chr2	-	11969394	11971039	0	0	0.025	13.74	0	57.435	0	128.62	Fun	FBgn0038213	CG9624
MI1235	chr2	chr2	-	11984374	11993552	1.505	1.7	2.285	9.555	2.945	7.52	13.715	7.665	Fun	FBgn0027083	MetRS-m
MI1236	chr2	chr2	+	11989601	11990782	0	0	0	1.725	0	5.97	0	24.38	Fun
MI1237	chr2	chr2	-	11993710	11994802	0	0.29	0	84.095	0	38.715	0	65.615	Fun	FBgn0038218	CG14841
MI1238	chr2	chr2	+	11994756	11995763	0	0.59	0	77.95	0	37.845	0	78.22	Fun	FBgn0038219	CG14839
MI1239	chr2	chr2	-	11995735	12017709	3.29	3.805	15.69	14.115	8.29	4.52	9.1	1.595	Fun	FBgn0003862	trx
MI1240	chr2	chr2	-	12019014	12021333	0	0.565	0.045	8.24	0.035	3.65	0	4.55	Dis	FBgn0039124	tbrd-1
MI1241	chr2	chr2	+	12021855	12023889	0	0	0.025	0.765	0	13.49	0.025	1.53	Fun	FBgn0039616	CG11828
MI1242	chr2	chr2	-	12023774	12074410	0.165	0.195	4.835	2.765	0.765	1.15	0	0.045	Fun	FBgn0039617	DIP-gamma
MI1243	chr2	chr2	-	12098153	12129120	12.63	7.755	19.605	26.245	30.935	15.465	4.925	1.32	Fun	FBgn0039620	wat
MI1244	chr2	chr2	+	12134314	12137915	2.205	2.4	6.615	16.975	6	26.27	9.43	23.105	Fun	FBgn0039623	CG1951
MI1245	chr2	chr2	-	12137865	12141139	1.745	1.505	5.87	21.54	7.015	27.305	50.975	38.55	Fun	FBgn0039625	beta4GalNAcTB
MI1246	chr2	chr2	+	12142558	12145228	5.5	6.715	10.775	21.85	10.175	6.685	25.37	5.085	Fun	FBgn0027873	Cpsf100
MI1247	chr2	chr2	-	12145188	12147766	5.95	6.19	15.26	28.655	11.795	22.22	13.71	15.085	Fun	FBgn0039626	Slu7
MI1248	chr2	chr2	+	12147714	12158138	2.99	3.21	17.765	8.345	13.26	8.815	5.675	1.32	Fun	FBgn0003093	Pkc98E
MI1249	chr2	chr2	+	12158323	12162564	7.505	4.215	9.02	6.905	24.45	10.265	5.58	3.81	Fun	FBgn0039629	CG11842
MI1250	chr2	chr2	+	12164076	12167712	1.34	1.56	5.08	6.75	3.83	2.32	14.48	1.35	Fun	FBgn0039631	Sirt7
MI1251	chr2	chr2	-	12167618	12168566	0.18	0.05	4.265	1.1	2.19	0.19	0.11	0.605	Fun	FBgn0012042	AttA
MI1252	chr2	chr2	-	12169049	12173135	4.41	4.43	16.425	17.74	16.79	4.99	29.275	3.855	Fun	FBgn0039632	Cul5
MI1253	chr2	chr2	+	12177131	12192693	7.525	8.05	9.105	11.185	16.345	5.305	18.985	2.02	Fun	FBgn0243512	puc
MI1254	chr2	chr2	+	12192874	12196297	0.44	1.64	1.42	23.955	103.28	38.535	103.27	52.075	Fun	FBgn0037549	CG7878
MI1255	chr2	chr2	-	12196236	12197864	8.64	9.15	21.79	28.955	12.87	10.1	50.03	17.04	Fun	FBgn0037550	CG9667
MI1256	chr2	chr2	+	12197971	12201589	30.205	21.97	54.21	44.805	33.69	22.155	116.45	32.93	Fun	FBgn0037551	Arl8
MI1257	chr2	chr2	-	12219640	12256653	2.735	2.155	10.46	5.285	0.645	0.405	0.025	0.01	Fun	FBgn0001138	grn
MI1258	chr2	chr2	-	12280623	12281411	0	0	0	0	2.315	0.29	0	0	Fun	FBgn0261290	CheA84a
MI1259	chr2	chr2	+	12294653	12296929	21.975	8.505	31.58	19.545	74.275	9.01	1.135	2.385	Fun	FBgn0037553	CG18249
MI1260	chr2	chr2	+	12309551	12310610	0	0.135	0.045	1.985	0.045	0.85	0	1.395	Fun
MI1261	chr2	chr2	-	12310560	12313059	0.07	1.425	0.24	50.55	0.05	49.585	0	52.035	Fun	FBgn0030684	CG8260
MI1262	chr2	chr2	+	12310712	12312123	0	0	0	1.85	0	9.74	0	30.66	Fun
MI1263	chr2	chr2	+	12312532	12316266	4.8	5.39	7.715	44.11	7.025	29.635	13.555	31.87	Fun	FBgn0037554	PolI
MI1264	chr2	chr2	-	12315582	12319086	11.54	12.85	26.655	30.69	40.915	14.68	55.485	9.275	Dis	FBgn0037555	Ada2b
MI1265	chr2	chr2	-	12320346	12323492	2.065	1.685	22.84	13.475	6.445	5.265	9.285	1.385	Fun	FBgn0037556	CG9636
MI1266	chr2	chr2	-	12324791	12325822	2.295	2.83	0.65	0.265	1.505	1.5	0	0	Fun	FBgn0013767	Crz
MI1267	chr2	chr2	-	12325981	12330238	24.85	24.9	15.63	21.19	16.25	10.55	17.91	7.905	Fun	FBgn0051321	CG31321
MI1268	chr2	chr2	+	12330014	12334311	8.425	7.935	20.965	31.18	22.75	23.465	40.98	13.24	Fun	FBgn0003567	su(Hw)
MI1269	chr2	chr2	-	12337296	12341147	17.685	16.895	31.895	41.735	23.755	49.5	34.04	64.145	Fun	FBgn0285913	red
MI1270	chr2	chr2	+	12351763	12352660	64.445	54.905	69.395	62.42	94.365	57.3	622.095	87.615	Fun	FBgn0013347	TfIIA-S
MI1271	chr2	chr2	+	12355791	12394443	14.555	8.295	76.585	63.33	21.83	8.65	60.75	5.97	Fun	FBgn0025574	Pli
MI1272	chr2	chr2	-	12380179	12381661	0.03	1.17	0.165	45.235	0.06	208.04	0	371.785	Fun	FBgn0031085	CG9570
MI1273	chr2	chr2	-	12398628	12401362	20294.3	16556.7	2309.28	825.22	6.745	4.145	0.015	0	Fun	FBgn0002563	Lsp1beta
MI1274	chr2	chr2	+	12398687	12401334	2.115	3.175	7.445	0.805	0	0	0.065	0	Fun
MI1275	chr2	chr2	-	12401757	12425703	0.435	0.39	3.495	1.585	3.43	2.295	0.06	0.15	Fun	FBgn0085384	CG34355
MI1276	chr2	chr2	+	12428032	12447937	14.185	14.775	43.04	63.295	14.49	122.76	21.69	92.8	Fun	FBgn0260634	eIF4G2
MI1277	chr2	chr2	-	12448925	12462288	6.935	8.775	5.755	9.51	21.96	14.435	16.71	5.95	Fun	FBgn0015513	mbc
MI1278	chr2	chr2	+	12471264	12487774	18.445	18.59	22.065	26.33	39.97	16.55	67.275	11.565	Fun	FBgn0039120	Nup98-96
MI1279	chr2	chr2	-	12487678	12489135	8.515	7.615	30.27	31.86	19.575	26.14	25.66	26.2	Fun	FBgn0039116	CG10375
MI1280	chr2	chr2	+	12488794	12489871	15.04	13.165	22.69	27.95	47.305	20.545	71.405	21.795	Fun	FBgn0039115	CG10214
MI1281	chr2	chr2	-	12489755	12491948	164.855	158.235	242.46	232.345	121.485	42.955	14.785	3.205	Fun	FBgn0039114	Lsd-1
MI1282	chr2	chr2	+	12492600	12496559	69.5	84.795	78.405	80.92	296.99	268.185	136.645	192.57	Fun	FBgn0039113	udt
MI1283	chr2	chr2	-	12493861	12495143	0.15	0.035	1.42	0.605	1.41	1.515	0.2	3.66	Fun
MI1284	chr2	chr2	-	12496205	12497743	19.29	21.69	26.045	25.75	48.76	22.66	50.57	8.025	Fun	FBgn0039111	PTPMT1
MI1285	chr2	chr2	+	12496800	12500823	11.62	12.41	13.7	34.74	14.74	44.11	21.425	49.875	Fun	FBgn0028475	Hrd3
MI1286	chr2	chr2	-	12500830	12506859	73.045	65.27	69.195	101.505	53.795	99.685	63.695	99.485	Fun	FBgn0028684	Rpt5
MI1287	chr2	chr2	+	12508726	12510789	14.5	16.24	31.885	77.145	23	122.05	71.31	253.98	Fun	FBgn0039110	RanBP3
MI1288	chr2	chr2	-	12510609	12534285	2.78	3.085	6.39	7.745	10.005	8.425	9.855	5.765	Fun	FBgn0263782	Hmgcr
MI1289	chr2	chr2	+	12536624	12542169	76.56	105.315	37.055	31.02	190.195	88.805	124.07	10.145	Fun	FBgn0027493	AdSS
MI1290	chr2	chr2	+	12542321	12543434	58.73	48.155	115.155	87.22	47.6	47.19	57.05	50.71	Fun	FBgn0038830	CG17272
MI1291	chr2	chr2	-	12543367	12546871	2139.95	2302.49	4190.23	3237.15	1872.82	491.99	2005.74	319.35	Fun	FBgn0019936	RpS20
MI1292	chr2	chr2	+	12544620	12554774	13.69	12.655	23.875	31.575	38.07	153.195	53.645	235.045	Fun	FBgn0053094	Synd
MI1293	chr2	chr2	+	12557488	12562983	1.21	0.665	0.405	5.24	6.61	17.365	15.51	14.38	Dis	FBgn0038832	CG15695
MI1294	chr2	chr2	+	12569157	12570851	0	0	0	0.21	0	0.76	0	0.81	Sil	FBgn0038833	CG15696
MI1295	chr2	chr2	+	12573521	12574513	2310.47	2160.77	3546.89	2593.55	1755.85	676.5	2402.74	357.97	Fun	FBgn0038834	RpS30
MI1296	chr2	chr2	-	12577982	12584688	0.375	0.355	8.67	5.17	1.88	1.36	0.01	0.03	Fun	FBgn0038837	KaiR1D
MI1297	chr2	chr2	+	12598127	12601464	0	0	0	0	0	0	0	0	Sil
MI1298	chr2	chr2	-	12610152	12610755	2.29	5.47	3805	1604.06	16.045	7.41	0	0	Fun	FBgn0028396	TotA
MI1299	chr2	chr2	-	12613031	12616320	0.71	0.925	8.525	4.365	5.605	6.61	0.035	0	Fun	FBgn0038839	Ktl
MI1300	chr2	chr2	+	12618800	12619480	0.265	3.25	4.595	1.08	0.13	2.105	0	0	Fun	FBgn0044810	TotX
MI1301	chr2	chr2	+	12620239	12620947	77.82	394.315	232.755	93.34	5.45	28.525	0.165	1.695	Fun	FBgn0031701	TotM
MI1302	chr2	chr2	+	12623402	12629543	0.045	0.175	0.175	0.065	4.365	4.925	0.015	0.055	Fun	FBgn0038840	Grik
MI1303	chr2	chr2	-	12626013	12626605	0.385	10.125	4.55	2.885	0.895	2.665	0	0	Fun	FBgn0044809	TotZ
MI1304	chr2	chr2	-	12630965	12633966	0.13	0.095	0.555	0.25	0.585	0.72	0.015	0.015	Sil	FBgn0051191	CG31191
MI1305	chr2	chr2	+	12634959	12650808	41.545	46.285	83.445	88.845	36.655	138.25	6.325	167.585	Dis	FBgn0038842	hdly
MI1306	chr2	chr2	+	12670172	12699929	33.415	40.2	142.505	78.42	211.16	149.055	101.14	8.67	Fun	FBgn0002921	Atpalpha
MI1307	chr2	chr2	-	12690239	12697753	0.045	0.045	2	0.805	0.565	0.14	0.18	0	Fun
MI1308	chr2	chr2	+	12701482	12737765	2.285	3.4	1.42	9.465	23.68	50.335	26.69	35.195	Fun	FBgn0013995	Calx
MI1309	chr2	chr2	-	12727672	12729651	125.835	139.775	0.02	0	35.24	8.485	0	0.065	Fun	FBgn0038845	Alp5
MI1310	chr2	chr2	+	12739435	12740464	1.215	2.165	166.28	124.81	9.88	6.935	0.21	0.21	Fun	FBgn0038846	CG5697
MI1311	chr2	chr2	-	12740348	12745608	0.255	0.46	3.325	2.47	0.86	2.785	1.065	1.795	Fun	FBgn0263986	cd
MI1312	chr2	chr2	+	12746231	12749970	2.265	2.79	5.52	22.545	5.07	18.76	12.735	14.65	Fun	FBgn0039003	wfs1
MI1313	chr2	chr2	+	12750388	12751703	44.7	53.06	14.16	14.895	72.675	29.84	58.275	10.45	Fun	FBgn0046114	Gclm
MI1314	chr2	chr2	-	12753143	12770348	1.655	1.44	8.62	5.89	3.33	1.8	2.725	1.245	Fun	FBgn0266418	wake
MI1315	chr2	chr2	-	12772193	12786060	0.06	0.05	0.31	0.17	0.19	0.21	0	0.115	Sil-Dis	FBgn0266418	wake
MI1316	chr2	chr2	+	12799468	12801325	8.105	7.495	14.895	20.01	13.105	9.21	12.335	5.465	Fun	FBgn0039557	CG12259
MI1317	chr2	chr2	-	12800910	12801991	33.63	34.005	39.95	57.555	32.105	50.27	184.035	228.695	Fun	FBgn0000119	arr
MI1318	chr2	chr2	+	12802052	12807361	6.49	5.99	12.21	14.8	10.555	13	7.815	33.195	Fun	FBgn0038321	CG6218
MI1319	chr2	chr2	-	12802581	12804666	3.795	4.415	8.75	6.94	13.99	3.59	21.43	1.655	Fun	FBgn0021750	SerRS-m
MI1320	chr2	chr2	-	12806658	12812182	5.67	6.63	25.985	29.04	12.88	14.08	16	8.7	Fun	FBgn0038320	Cyfip
MI1321	chr2	chr2	+	12813041	12815063	0.085	0.08	0.275	0.44	3.76	0.755	7.295	1.325	Dis	FBgn0000119	arr
MI1322	chr2	chr2	+	12816510	12818737	54.975	61.2	88.405	154.79	314.085	56.86	268.02	40.24	Fun	FBgn0013269	Fkbp39
MI1323	chr2	chr2	-	12816590	12820736	6.845	7.195	7.4	7.74	15.47	7.1	28.69	3.545	Fun	FBgn0000533	ea
MI1324	chr2	chr2	+	12820678	12822932	0.41	0.465	0.045	30.185	0.895	140.785	1.62	345.49	Fun
MI1325	chr2	chr2	-	12820844	12823698	0.395	0.35	1.195	0.985	0.355	1.375	0.11	3.05	Dis	FBgn0085438	CG34409
MI1326	chr2	chr2	-	12824529	12826430	7.895	7.73	68.58	40.87	13.345	7.235	22.74	4.49	Fun	FBgn0037739	CG12948
MI1327	chr2	chr2	+	12827147	12830461	8.895	10.635	16.825	38.78	32.975	28.525	50.025	22.195	Fun	FBgn0005777	PpD3
MI1328	chr2	chr2	-	12829774	12833977	2.57	3.005	5.275	5.82	8.415	2.91	16.15	1.455	Fun	FBgn0037741	CG16908
MI1329	chr2	chr2	-	12834075	12835486	0.275	4.065	0.305	68.54	0.405	81.22	0.48	181.42	Fun	FBgn0037742	Rpt3R
MI1330	chr2	chr2	+	12835951	12841224	18.67	21.625	13.19	15.77	35.98	38.745	21.41	34.345	Fun	FBgn0037743	Alg12
MI1331	chr2	chr2	-	12840656	12842773	16.79	16.735	31.685	25.12	24.3	16.74	37.05	10.445	Fun	FBgn0266720	Snap24
MI1332	chr2	chr2	+	12843365	12845582	3.25	3.95	15.86	117.3	5.08	124.54	35.25	134.24	Fun	FBgn0037746	CG8478
MI1333	chr2	chr2	-	12845492	12847053	8.895	8.46	27.605	32.33	29.02	21.83	36.64	22.11	Fun	FBgn0024330	MED6
MI1334	chr2	chr2	+	12847085	12849455	10.38	11.065	10.45	18.15	19.085	35.01	60.09	27.845	Fun	FBgn0037747	Naa80
MI1335	chr2	chr2	-	12849953	12853630	21.325	21.89	20.45	20.065	45.28	19.825	30.025	8.205	Fun	FBgn0037750	Whamy
MI1336	chr2	chr2	+	12854315	12858697	2140.43	1872.45	1856.37	1368.07	2399.53	837.235	3877.58	473.225	Fun	FBgn0037751	topi
MI1337	chr2	chr2	-	12860827	12861912	1.27	0.31	1.445	0.56	1.4	0.565	0.045	0.05	Fun
MI1338	chr2	chr2	+	12863455	12868324	0.285	0.42	5.7	3.785	4.12	3.795	0.185	0.44	Fun	FBgn0037754	CG8500
MI1339	chr2	chr2	-	12866641	12870189	2.645	2.135	2.46	3.73	10.625	4.63	51.55	4.56	Fun	FBgn0037755	CG12945
MI1340	chr2	chr2	+	12870500	12872521	17.395	14.435	29.69	29.04	74.075	18.76	96.57	17.92	Fun	FBgn0037756	CG8507
MI1341	chr2	chr2	+	12878462	12883011	3.955	4.185	14.155	12.535	11.95	6.665	17.45	3.805	Fun	FBgn0037757	CG8516
MI1342	chr2	chr2	-	12882998	12886486	10.405	8.185	15.945	17.01	11.01	10.285	19.785	6.69	Fun	FBgn0037758	CG9467
MI1343	chr2	chr2	+	12886804	12889111	0	0.085	0.02	27.505	0.015	151.73	0.025	321.515	Fun	FBgn0037759	CG8526
MI1344	chr2	chr2	-	12887018	12888265	0	0.035	0.255	1.36	0.36	2.265	0.13	3.45	Fun
MI1345	chr2	chr2	-	12889082	12895061	6.6	6.185	19.675	19.05	11.07	11.505	24.96	7.415	Fun	FBgn0037760	FBXO11
MI1346	chr2	chr2	+	12896431	12897215	0	0	0	8.76	0	42.385	0	112.74	Fun	FBgn0039002	CG17625
MI1347	chr2	chr2	-	12901384	12902565	0	0	0	11.175	186.215	173.445	0.14	10.64	Fun	FBgn0037763	CG16904
MI1348	chr2	chr2	-	12903010	12903985	0	0	0	0	37.9	34.935	0.21	1.53	Dis	FBgn0037761	CG8534
MI1349	chr2	chr2	-	12907056	12907874	0	1.21	0	13.515	0	7.74	0	26.86	Fun	FBgn0085331	CG34302
MI1350	chr2	chr2	+	12907659	12909692	0	1.25	0	28.645	0	13.445	0	19.125	Fun	FBgn0027057	CSN1b
MI1351	chr2	chr2	-	12911454	12942683	0.135	0.065	2.445	1.44	1.005	1.03	0	0.145	Fun	FBgn0037766	Teh1
MI1352	chr2	chr2	+	12920850	12922988	0	0.385	0	36.7	0	46.315	0	78.12	Fun
MI1353	chr2	chr2	-	12944153	12944959	0	0	0	18.055	0	62.455	0	174.545	Fun	FBgn0036502	CG7841
MI1354	chr2	chr2	+	12945503	12949533	0	0	0.01	12.82	0.01	103.39	0	132.625	Fun	FBgn0026189	promL
MI1355	chr2	chr2	+	12958930	12973918	7.115	6.495	23.275	14.195	50.01	43.275	5.2	7.89	Fun	FBgn0285925	Fas1
MI1356	chr2	chr2	+	12974822	12980006	1.85	2.725	4.58	44.35	5.365	61.005	12.815	50.265	Fun	FBgn0037379	CG10979
MI1357	chr2	chr2	+	12981377	12990384	0.14	0.115	0.045	0.065	1.915	1.29	0.015	0.055	Fun	FBgn0263353	CG11000
MI1358	chr2	chr2	+	12992548	13021206	19.98	17.31	12.6	64.655	5.56	165.88	0.42	253.195	Fun	FBgn0261561	CG42675
MI1359	chr2	chr2	-	12996561	12999241	11.395	12.815	32.41	72.835	26.195	29.505	43.715	22.8	Fun	FBgn0037382	Hpr1
MI1360	chr2	chr2	-	13002269	13002926	0	0	0	17.25	0	116.405	0	1069.81	Fun	FBgn0036029	CG16719
MI1361	chr2	chr2	-	13009873	13014128	0	0.08	0.03	4.585	0.075	4.41	0.235	3.02	Fun	FBgn0023515	CG14814
MI1362	chr2	chr2	+	13024783	13025388	2166.3	2103.11	3711.88	2263.78	1606.95	611.35	2732.93	308.015	Fun	FBgn0086710	RpL30
MI1363	chr2	chr2	-	13025609	13026896	12.165	13.32	13.07	19.24	18.92	11.315	40.57	7.62	Fun	FBgn0037383	Sec20
MI1364	chr2	chr2	+	13027067	13029080	3.89	4.905	13.35	24.91	11.145	11.07	47.325	10.11	Fun	FBgn0037384	dgrn
MI1365	chr2	chr2	+	13031361	13035589	0.04	0.045	63.845	25.19	25.52	18.235	0	0.215	Fun	FBgn0038946	rdhB
MI1366	chr2	chr2	+	13046402	13049599	0	0	0	9.51	0	53.035	0	111.185	Fun	FBgn0038944	CG5388
MI1367	chr2	chr2	+	13052056	13052908	10.35	7.555	0.06	0.51	0.575	0.68	0	0.52	Fun	FBgn0038943	CG5391
MI1368	chr2	chr2	-	13053145	13053924	1.155	2.595	1.905	0.37	1.385	0.775	0	0.165	Fun	FBgn0038942	CG13862
MI1369	chr2	chr2	-	13054054	13061526	0.02	0	0.305	0.42	0.045	0.035	0	0.045	Sil	FBgn0038941	CG7080
MI1370	chr2	chr2	+	13062120	13076593	0.145	0.16	18.315	12.005	0.12	0.11	0	0.005	Fun	FBgn0263117	CG34377
MI1371	chr2	chr2	-	13081154	13085197	15.15	31.47	1.03	1.56	55.145	57.04	0.155	3.3	Fun	FBgn0038938	CG7084
MI1372	chr2	chr2	-	13086012	13262466	1.67	1.855	23.5	14.445	7.065	1.465	22.845	0.665	Fun	FBgn0051163	SKIP
MI1373	chr2	chr2	-	13160714	13165836	0.02	0.385	2.79	37.025	0.025	48.695	0.17	54.075	Dis	FBgn0038934	Gld2
MI1374	chr2	chr2	-	13199260	13201289	0.62	0.875	47.615	24.21	0.365	0.135	0.615	0.09	Fun
MI1375	chr2	chr2	-	13201713	13203256	0.445	0.61	28.86	15.59	0.305	0.045	0.59	0.09	Fun
MI1376	chr2	chr2	-	13263805	13279235	10.415	18.29	16.565	4.685	35.415	27.28	2.96	0.97	Fun	FBgn0259736	CG42390
MI1377	chr2	chr2	+	13282160	13284348	0	0	0	0	0	0	0	0	Sil-Dis	FBgn0051423	Ir94c
MI1378	chr2	chr2	-	13284661	13286889	0	0.015	0	0	0	0	0	0	Sil	FBgn0051423	Ir94c
MI1379	chr2	chr2	-	13295214	13298139	0	0	0	0.03	0	0.015	0	0.245	Sil	FBgn0038931	CG13407
MI1380	chr2	chr2	-	13309330	13322117	17.055	20.555	23.375	24.345	16.13	36.255	0.535	28.405	Fun	FBgn0038603	PKD
MI1381	chr2	chr2	-	13326902	13328089	0.04	0.045	0	15.99	0	10.115	0	9.79	Fun	FBgn0017551	Rca1
MI1382	chr2	chr2	-	13329700	13341913	0.16	0.22	5.905	5.385	0.165	2.47	0	3.465	Fun	FBgn0286852	naz
MI1383	chr2	chr2	-	13344702	13380258	0.785	0.815	1.19	1.105	1.74	1.76	0.105	1.62	Fun	FBgn0038606	CG15803
MI1384	chr2	chr2	+	13380495	13383951	0	0.115	0.33	35.02	0.075	97.59	0	102.525	Fun	FBgn0038607	hmw
MI1385	chr2	chr2	-	13382199	13382771	0	0	0	1.98	0	0.475	0	0.43	Dis
MI1386	chr2	chr2	-	13383905	13385696	5.165	5.01	15.34	25.585	13.23	22.79	69.48	75.075	Fun	FBgn0038608	WRNexo
MI1387	chr2	chr2	+	13386309	13387575	15.565	15.83	25.71	61.15	21.695	27.65	200.895	81.66	Fun	FBgn0038609	Nup43
MI1388	chr2	chr2	-	13386380	13393641	0.355	0.38	3.06	4.755	0.99	3.875	0	4.15	Fun	FBgn0004618	gl
MI1389	chr2	chr2	-	13399576	13402875	38.6	61.665	171.05	98.665	27.24	65.015	10.915	6.635	Dis	FBgn0038610	CG7675
MI1390	chr2	chr2	-	13404328	13407909	0	0	0.01	0	1.28	0.03	54.74	0.07	Fun	FBgn0038611	CG14309
MI1391	chr2	chr2	-	13410051	13410503	0	0	0	0	1.56	1.28	0	0	Dis	FBgn0038613	Vha100-4
MI1392	chr2	chr2	-	13412289	13420386	71.17	77.33	21.11	19.26	134.075	31.515	92.585	4.515	Fun	FBgn0028670	Vha100-2
MI1393	chr2	chr2	+	13421495	13422267	13.83	9.02	24.835	19.75	16.575	13.93	62.75	21.39	Fun	FBgn0264751	Vti1b
MI1394	chr2	chr2	-	13422079	13425252	2.93	2.585	7.45	19.44	6.785	16.67	12.235	13.84	Fun	FBgn0038617	Wdr37
MI1395	chr2	chr2	+	13425356	13427322	5.835	5.735	15.23	26.25	25.27	17.79	56.025	20.585	Fun	FBgn0264816	koko
MI1396	chr2	chr2	+	13427846	13429157	3.67	3.585	11.68	21.69	5.605	23.21	29.97	33.595	Fun	FBgn0038619	CG7685
MI1397	chr2	chr2	-	13429074	13435965	3.65	3.125	16.305	13.225	6.455	3.19	8.145	1.39	Fun	FBgn0051122	CG31122
MI1398	chr2	chr2	-	13437486	13438402	0	0	0	14.39	0.16	111.365	0.08	2033.84	Fun	FBgn0038978	tHMG1
MI1399	chr2	chr2	-	13438741	13440726	0.205	0.185	0.495	0.185	2.915	1.89	1.145	1.09	Fun	FBgn0053346	CG33346
MI1400	chr2	chr2	+	13443604	13444581	0	0.05	0	25.725	0	79.765	0.255	248.48	Fun	FBgn0032312	CG14071
MI1401	chr2	chr2	+	13446527	13449457	18.525	17.88	0.015	0.405	10.89	3.905	0.02	0.415	Fun	FBgn0038613	Vha100-4
MI1402	chr2	chr2	-	13449955	13482975	11.265	13.425	3.55	1.55	8.3	5.475	1.895	1.215	Fun	FBgn0004652	fru
MI1403	chr2	chr2	-	13540978	13542758	0	0.065	0	48.45	0	308.575	0.025	751.255	Fun	FBgn0265935	coro
MI1404	chr2	chr2	+	13560266	13567982	0	0	0	0	0	0	0	0	Sil
MI1405	chr2	chr2	-	13605076	13607222	0	0	0.055	4.81	0	21.37	0	57.355	Fun	FBgn0036159	CG7557
MI1406	chr2	chr2	-	13609040	13620729	0.45	0	5.125	2.41	1.49	0.315	0.375	0.235	Fun	FBgn0262846	CG43210
MI1407	chr2	chr2	+	13613880	13615064	0	0.125	0	14.7	0	7.895	0	9.79	Fun	FBgn0038626	CG7691
MI1408	chr2	chr2	+	13630673	13652724	57.82	54.29	71.445	85.605	42.06	107.075	51.275	161.625	Fun	FBgn0023083	fray
MI1409	chr2	chr2	+	13640763	13641541	0.1	0.29	0.12	71.025	0	248.44	0	611.805	Dis	FBgn0027066	Eb1
MI1410	chr2	chr2	+	13654735	13727872	0.475	1.625	0.895	6.87	31.485	5.335	46.28	4.48	Dis	FBgn0263974	qin
MI1411	chr2	chr2	-	13656377	13690529	4.215	4.92	6.76	4.325	0.73	1.12	0.065	0.485	Dis	FBgn0038629	CG14304
MI1412	chr2	chr2	+	13666470	13669073	0	0.075	0	28.68	0.04	107.17	0	242.325	Fun	FBgn0038630	CG14305
MI1413	chr2	chr2	-	13670981	13671625	0	0	0	8.26	0	29.6	0	260.215	Fun	FBgn0085229	CG34200
MI1414	chr2	chr2	-	13701822	13719398	0.51	0.43	3.495	5.525	2.705	2.93	0.135	1.065	Fun	FBgn0038632	CG14301
MI1415	chr2	chr2	-	13789113	13799301	3.635	4.165	13.205	15.795	7.62	10.23	15.59	6.105	Fun	FBgn0051224	CG31224
MI1416	chr2	chr2	+	13799892	13801416	11.065	12.985	22.05	44.56	13.63	14.08	28.74	14.695	Fun	FBgn0027841	CstF64
MI1417	chr2	chr2	-	13801355	13805527	4.81	6.77	11.45	33.015	8.19	11.585	12.04	9.87	Fun	FBgn0261065	Cpsf73
MI1418	chr2	chr2	+	13803960	13807578	17.33	15.1	25.285	26.965	15.295	24.195	78.495	123.765	Fun	FBgn0044871	Gos28
MI1419	chr2	chr2	+	13807770	13812924	22.435	22.13	14.12	12.715	9.025	8.705	0.67	5.635	Fun	FBgn0038638	CG7702
MI1420	chr2	chr2	-	13812901	13815833	7.455	10.4	12.18	38.59	18.685	15.175	31.86	9.11	Fun	FBgn0286828	dind
MI1421	chr2	chr2	-	13817861	13827991	131.525	261.81	35.195	73.745	119.855	115.89	51.845	74.425	Fun	FBgn0002719	Men
MI1422	chr2	chr2	+	13842058	13842861	44.035	13.88	14.685	3.14	11.96	7.995	0.14	0.145	Dis	FBgn0030050	CG12111
MI1423	chr2	chr2	-	13849782	13853331	0.34	0.1	0	0.185	18.54	22.16	0	0.73	Fun	FBgn0030050	CG12111
MI1424	chr2	chr2	-	13859073	13900031	0.105	0.14	1.59	0.905	0.375	0.475	0	0	Fun	FBgn0038084	beat-Vc
MI1425	chr2	chr2	-	13929271	13935140	1.12	1.25	0.42	34.28	12.305	141.465	0	306.615	Fun	FBgn0051345	CG31345
MI1426	chr2	chr2	-	13959681	13968262	0.22	0.19	2.335	1.405	0.75	0.68	0	0	Fun	FBgn0038087	beat-Va
MI1427	chr2	chr2	+	13972303	13973793	0	0	0	0	0	1.455	0	0.055	Fun
MI1428	chr2	chr2	-	13977221	13979556	38.735	40.72	50.215	58.68	35.99	25.985	2.915	12.49	Fun	FBgn0038088	CG10126
MI1429	chr2	chr2	-	14032167	14033349	0	0	0	21.675	0	31.645	0	44.29	Fun	FBgn0038090	CG10909
MI1430	chr2	chr2	+	14037825	14052851	0.225	0.245	3.265	1.93	1.42	0.83	0.335	0	Fun	FBgn0038092	beat-Vb
MI1431	chr2	chr2	-	14073426	14089565	86.36	78.28	61.84	98.485	32.8	33.84	81.445	39.805	Fun	FBgn0040493	grsm
MI1432	chr2	chr2	+	14090263	14091324	8.995	7.055	21.425	65.31	8.075	47.19	45.375	92.265	Fun	FBgn0087021	Spc25
MI1433	chr2	chr2	+	14091486	14093725	31.4	22.215	30.465	12.065	24.695	10.24	0.18	0.54	Fun	FBgn0038095	Cyp304a1
MI1434	chr2	chr2	-	14093497	14095702	0	0.195	0	25.91	0	71.53	0.035	133.575	Fun	FBgn0038097	CG14384
MI1435	chr2	chr2	-	14096576	14100675	10.825	14.275	0.355	1.01	26.01	7.265	1.625	1.36	Fun	FBgn0038098	CG7381
MI1436	chr2	chr2	+	14111532	14114180	0	0	0.015	0.23	11.05	0.155	32.265	0.14	Fun	FBgn0038099	CG7091
MI1437	chr2	chr2	+	14114623	14115524	0.135	0.055	289.38	50.66	0.095	21.37	0.45	56.49	Fun
MI1438	chr2	chr2	+	14116214	14120220	27.46	23.99	45.405	57.95	32.1	99.47	36.105	141.87	Fun	FBgn0038100	Paip2
MI1439	chr2	chr2	+	14120888	14129928	32.085	25.965	130.535	251.465	62.63	189.895	100.66	536.855	Fun	FBgn0051342	CG31342
MI1440	chr2	chr2	-	14128170	14128715	0	0	0.125	0	0.075	0.135	0	0.135	Sil-Dis	FBgn0038102	CG14383
MI1441	chr2	chr2	-	14132001	14132908	0.1	0	0.905	1.115	0.1	0.365	0	0.655	Dis	FBgn0038102	CG14383
MI1442	chr2	chr2	-	14135831	14148250	0	0	0	0.16	0.065	0.295	0	0.215	Sil-Dis	FBgn0038102	CG14383
MI1443	chr2	chr2	+	14145034	14145251	8.84	5.475	44.215	109.4	20.135	79.195	22.79	268.605	Dis
MI1444	chr2	chr2	-	14151178	14153106	0	0	0	0.45	0.055	0	0	0.1	Sil	FBgn0038102	CG14383
MI1445	chr2	chr2	+	14153507	14155119	0	0	0	0	0	0	0	0	Sil	FBgn0051342	CG31342
MI1446	chr2	chr2	-	14155148	14157066	0	0	0.225	0.385	0	0.055	0	0.14	Sil	FBgn0038102	CG14383
MI1447	chr2	chr2	+	14157457	14159068	0	0	0	0	0	0	0	0	Sil	FBgn0051342	CG31342
MI1448	chr2	chr2	-	14159566	14159827	0	0	0	0	0	0	0	0	NA
MI1449	chr2	chr2	+	14161417	14163021	0	0	0.055	0.17	0	0	0	0.155	Sil	FBgn0051342	CG31342
MI1450	chr2	chr2	-	14163517	14164041	0	0	0.415	2.93	0.125	0.93	0	0.7	Dis	FBgn0038102	CG14383
MI1451	chr2	chr2	-	14171434	14171858	0.01	0	0.51	4.34	0.62	1.135	0.205	1.615	Dis	FBgn0038102	CG14383
MI1452	chr2	chr2	-	14175203	14175855	0	0	0	9.99	0	19.09	0	31.305	Dis	FBgn0038102	CG14383
MI1453	chr2	chr2	-	14178909	14182505	17.33	18.815	2.115	5.12	14.14	5.67	0.62	2.305	Fun	FBgn0038105	yellow-f2
MI1454	chr2	chr2	+	14184466	14195174	3.435	4.185	13.915	36.43	9.19	32.33	10.41	20.105	Fun	FBgn0038108	CG7518
MI1455	chr2	chr2	-	14195168	14198799	44.31	36.675	53.6	46.1	41.39	32.39	55.64	28.875	Fun	FBgn0038110	CG8031
MI1456	chr2	chr2	+	14195309	14197915	0.015	0.07	0.51	32.73	0.015	79.525	0	232.575	Dis	FBgn0038109	CG11656
MI1457	chr2	chr2	+	14198337	14213770	27.83	27.6	91.165	69.995	48.075	24.995	86.35	11.05	Fun	FBgn0020496	CtBP
MI1458	chr2	chr2	-	14212865	14218820	6.39	7.02	11.34	35.5	12.035	60.49	12.355	54.35	Fun	FBgn0283438	CG46280
MI1459	chr2	chr2	-	14220017	14221080	2.135	3.45	5.355	63.99	0.725	64.72	3.145	332.175	Fun
MI1460	chr2	chr2	+	14221322	14222353	2.62	2.945	3.255	3.04	14.93	7.515	53.19	2.855	Fun	FBgn0002354	l(3)87Df
MI1461	chr2	chr2	+	14222594	14228185	4.605	3.435	5.635	1.375	9.405	5.225	0.045	2.295	Fun	FBgn0003308	ry
MI1462	chr2	chr2	+	14229823	14231780	0.895	1.095	0.215	0.15	1.79	1.98	0.03	0.075	Fun	FBgn0038113	CG11668
MI1463	chr2	chr2	-	14231380	14233577	0.535	0.71	0	0	5.765	0.27	7.135	0	Dis	FBgn0003450	snk
MI1464	chr2	chr2	+	14233291	14236352	4.005	4.045	0.2	0.04	1.415	0.255	0.965	0.03	Dis	FBgn0038114	CG11670
MI1465	chr2	chr2	-	14236599	14240804	0.1	0.205	0.035	0.04	0.2	2.57	0	0.01	Fun
MI1466	chr2	chr2	+	14236861	14242784	9.52	14.725	0.005	21.705	4.54	86.48	0.69	94.085	Fun	FBgn0001217	Hsc70-2
MI1467	chr2	chr2	-	14242571	14245731	5.845	5.915	6.65	5.905	6.755	2.99	0.72	0.125	Fun	FBgn0038115	CG7966
MI1468	chr2	chr2	+	14246722	14248230	17.805	17.925	9.015	14.765	20.925	10.695	23.58	2.78	Fun	FBgn0037356	CG12170
MI1469	chr2	chr2	-	14247571	14259613	4.835	4.975	18.215	18.915	16.115	10.135	29.355	7.28	Fun	FBgn0027951	MTA1-like
MI1470	chr2	chr2	+	14250296	14253501	0	0	0.03	0.67	0.09	2.305	0	2.155	Dis
MI1471	chr2	chr2	+	14259486	14263134	30.505	33.925	41.135	44.54	32.42	30.885	29.45	10.54	Fun	FBgn0262125	Sec23
MI1472	chr2	chr2	-	14263110	14264774	169.105	171.38	37.685	56.805	135.625	91.845	77.985	32.555	Fun	FBgn0037358	elm
MI1473	chr2	chr2	+	14265745	14266988	3.76	4.065	20.53	31.885	7.605	19.575	27.115	26.445	Fun	FBgn0037359	MED27
MI1474	chr2	chr2	-	14266873	14270096	17.525	17.92	38.43	40.79	49.7	18.935	100.14	6.325	Fun	FBgn0037360	CG2182
MI1475	chr2	chr2	+	14273391	14278008	10.055	13.065	21.6	34.83	26.875	10.41	30.575	5.68	Fun	FBgn0260962	pic
MI1476	chr2	chr2	-	14278289	14278973	0	0.07	0	16.11	0.19	121.38	0	326.385	Fun	FBgn0036090	CG8009
MI1477	chr2	chr2	+	14279674	14301252	0.17	0.14	2.29	1.14	1.925	0.405	9.485	0.22	Fun	FBgn0004666	sim
MI1478	chr2	chr2	+	14310521	14311167	0	0	0	0	0	118.795	0	3.77	Fun	FBgn0262365	CG43063
MI1479	chr2	chr2	+	14313294	14382084	1.225	1.33	2.335	3.475	8.725	1.1	17.645	0.705	Fun	FBgn0038118	timeout
MI1480	chr2	chr2	-	14348159	14373878	0.275	0.25	4.455	2.65	1.045	0.92	0.005	0.035	Fun	FBgn0260793	2mit
MI1481	chr2	chr2	+	14396980	14398511	0	0.025	0	18.42	0.025	60.1	0.035	85.02	Fun	FBgn0038122	CG8138
MI1482	chr2	chr2	+	14402913	14404433	0	0.03	0	11.73	0	50.775	0	112.505	Fun	FBgn0038124	CG14380
MI1483	chr2	chr2	-	14425253	14431358	3.81	6.91	3.185	7.04	3.35	1.655	0.235	0.3	Fun	FBgn0038126	CG8483
MI1484	chr2	chr2	-	14436877	14437805	0	0	0	11.875	0.045	57.94	0	115.365	Dis	FBgn0038127	CG8476
MI1485	chr2	chr2	-	14441233	14479435	1.875	1.925	17.225	11.415	5.465	5.125	0.07	0.625	Fun	FBgn0000024	Ace
MI1486	chr2	chr2	+	14483265	14484878	48.61	38.05	86.965	49.675	36.285	23.22	27.89	64.99	Fun	FBgn0040551	CG11686
MI1487	chr2	chr2	-	14484664	14486335	1.945	2.73	6.48	19.63	4.105	7.365	10.485	5.275	Fun	FBgn0038128	Ravus
MI1488	chr2	chr2	+	14486391	14492641	3.45	4.04	12.745	20.995	10.545	7.4	32.66	5.115	Dis	FBgn0003598	Su(var)3-7
MI1489	chr2	chr2	-	14491639	14492647	0	0	0.22	1.08	0.04	3.16	0	3.44	Fun
MI1490	chr2	chr2	-	14493051	14495871	16.845	12.595	36.44	35.45	17.66	17.33	21.12	13.36	Fun	FBgn0038129	TBC1D5
MI1491	chr2	chr2	+	14496132	14500181	5.44	5.275	4.6	6.62	10.115	9.125	6.71	4.85	Fun	FBgn0039249	CG11168
MI1492	chr2	chr2	+	14500636	14503181	6.265	6.86	25.96	111.765	5.475	171.11	18.72	167.9	Fun	FBgn0039250	Mink
MI1493	chr2	chr2	+	14503708	14505326	0	0.2	0.025	35.435	7.875	42.49	99.19	103.495	Fun	FBgn0039251	Trf4-2
MI1494	chr2	chr2	+	14507048	14509692	17.73	22.615	22.455	56.01	21.855	31.32	36.71	36.52	Fun	FBgn0039252	CG11771
MI1495	chr2	chr2	-	14509579	14513197	24.055	23.62	16.3	31.77	24.945	37.475	21.575	24.5	Fun	FBgn0020626	Osbp
MI1496	chr2	chr2	+	14510956	14513130	0	0	0.075	2.81	0	3.575	0	3.46	Fun
MI1497	chr2	chr2	-	14514287	14522091	4.855	5.015	9.43	16.21	16.78	20.105	23.38	15.77	Dis	FBgn0029157	ssh
MI1498	chr2	chr2	+	14519016	14523442	10.98	11.295	13.12	22.965	29.575	19.12	15.415	14.285	Fun	FBgn0039254	Nmnat
MI1499	chr2	chr2	+	14523660	14525881	0	0	13.715	5.455	0.075	0	0.025	0	Fun	FBgn0285912	mah
MI1500	chr2	chr2	+	14559590	14600670	0.64	0.5	51.12	24.79	1.715	1.25	0.08	2.065	Fun	FBgn0039257	tnc
MI1501	chr2	chr2	+	14601271	14602739	0.08	2.315	0.595	64.77	0.435	91.45	0.145	160.67	Dis	FBgn0020369	Rpt6
MI1502	chr2	chr2	+	14603481	14609618	4.11	4.325	5.915	11.305	11.27	9.525	20.675	7.705	Fun	FBgn0015240	Hr96
MI1503	chr2	chr2	-	14604741	14606385	9.795	9.365	17.765	18.485	21.025	16.58	103.25	38.93	Fun	FBgn0039259	EMC6
MI1504	chr2	chr2	-	14624511	14631358	8.705	9.51	27.28	17.57	26.325	11.505	28.45	4.98	Fun	FBgn0003169	put
MI1505	chr2	chr2	+	14630789	14633342	875.24	745.55	3063.62	1886.73	743.275	415.5	3095.93	817.735	Fun	FBgn0053909	His4:CG33909
MI1506	chr2	chr2	-	14632515	14660413	4.27	5.11	23.97	73.075	8.925	287.405	17.085	324.1	Fun	FBgn0086686	l(3)L1231
MI1507	chr2	chr2	+	14637049	14647799	0.01	0.085	0.44	1.55	0.105	1.935	1.06	1.75	Fun	FBgn0038247	Cad88C
MI1508	chr2	chr2	+	14660481	14662501	48.875	26.605	31.18	24.82	9.28	4.88	1.935	4.7	Fun	FBgn0038250	CG3505
MI1509	chr2	chr2	+	14664650	14666652	7.06	6.35	17.81	20.195	10.125	8.845	39.71	7.53	Fun	FBgn0038251	Hexim
MI1510	chr2	chr2	-	14667264	14703502	6.345	7.54	23.355	22.595	9.5	4.675	4.675	1.38	Dis	FBgn0265140	Meltrin
MI1511	chr2	chr2	-	14709115	14712082	11.02	9.885	32.255	41.62	28.555	11.02	56.465	4.64	Fun	FBgn0261108	Atg13
MI1512	chr2	chr2	-	14713201	14715799	2.23	1.9	11.765	31.235	5.045	60.375	19.825	94.675	Fun	FBgn0037581	CG7352
MI1513	chr2	chr2	-	14715871	14719277	51.84	55.345	52.36	99.86	79.53	186.96	53.98	176.255	Fun	FBgn0037580	DppIII
MI1514	chr2	chr2	+	14719619	14723346	12.16	14.575	17.38	78.715	17.1	70.595	14.87	50.915	Fun	FBgn0039875	sip3
MI1515	chr2	chr2	-	14723059	14725182	3.14	3.31	11.905	20.315	8.17	13.18	18.675	12.26	Fun	FBgn0039876	CG2126
MI1516	chr2	chr2	+	14725363	14740467	12.83	15.535	35.29	29.59	30.67	20.18	38.565	6.935	Fun	FBgn0005632	faf
MI1517	chr2	chr2	-	14741360	14744360	7.315	10.05	5.995	9.285	12.365	6.92	29.17	3.27	Fun	FBgn0039877	Mccc1
MI1518	chr2	chr2	+	14744955	14746601	24.975	27.41	40.42	74.475	30	84.055	52.39	106.675	Fun	FBgn0064126	CG33722
MI1519	chr2	chr2	-	14746573	14750311	0	0	0.01	0.03	0.075	9.34	0.03	0.205	Dis	FBgn0040528	CG15864
MI1520	chr2	chr2	+	14751624	14760548	0.43	0.295	0.885	0.695	0.26	0.255	0	0.025	Sil	FBgn0260386	mtg
MI1521	chr2	chr2	-	14760712	14763075	14.735	16.22	34.27	47.775	31.305	16.155	90.66	11.185	Fun	FBgn0010173	RpA-70
MI1522	chr2	chr2	+	14763254	14766247	5.845	7.44	10.4	26.595	10.475	8.21	27.665	6.49	Fun	FBgn0014861	Mcm2
MI1523	chr2	chr2	-	14766238	14768134	4.75	5.95	9.13	17.31	17.275	5.135	12.94	2.72	Fun	FBgn0037561	CG9630
MI1524	chr2	chr2	-	14768420	14775059	23.03	21.97	36.295	47.275	46.345	146.65	33.63	176.65	Fun	FBgn0011225	jar
MI1525	chr2	chr2	+	14792764	14795429	2.045	2.12	1.575	1.925	4.83	4.32	1.4	1.225	Fun	FBgn0086365	Orct2
MI1526	chr2	chr2	-	14796088	14798635	0.08	0.045	1.61	0.89	0.015	0.025	0.015	0	Fun
MI1527	chr2	chr2	+	14796300	14798574	34.605	6.735	63.705	34.45	6.375	3.025	0.71	0.055	Fun	FBgn0019952	Orct
MI1528	chr2	chr2	+	14800200	14801876	0	0.025	0	20.475	0.025	50.11	0.03	154.06	Fun	FBgn0286199	shps
MI1529	chr2	chr2	+	14804651	14808940	9.82	6.81	58.54	33.115	18.32	7.565	3.33	0.065	Fun	FBgn0039178	CG6356
MI1530	chr2	chr2	-	14808856	14810150	7.96	10.915	0	0	0.08	0	0	0	Fun	FBgn0085319	CG34290
MI1531	chr2	chr2	+	14811946	14813650	7.2	6.795	15.625	13.085	15.08	8.47	48.06	6.415	Fun	FBgn0039427	CG5447
MI1532	chr2	chr2	+	14813826	14814223	253.255	741.185	0	0	0.145	0	0	0.18	Dis
MI1533	chr2	chr2	-	14814177	14815014	2.67	2.935	3.59	2.64	4.16	4.045	0	0	Fun	FBgn0023178	Pdf
MI1534	chr2	chr2	+	14815534	14816039	7.09	10.615	0	0.09	0	0	0	0	Fun	FBgn0039428	CG14237
MI1535	chr2	chr2	+	14816774	14817276	492.345	1281.06	0.57	0.195	0	0	0	0	Fun	FBgn0039428	CG14237
MI1536	chr2	chr2	-	14818602	14864373	0.995	0.82	1.725	1.15	2.48	2.165	0.265	0.135	Fun	FBgn0038237	Pde6
MI1537	chr2	chr2	+	14829864	14835218	0	0	0.02	0.01	0.015	0.01	0.015	0	Fun
MI1538	chr2	chr2	-	14864653	14865920	1.59	1.23	0.48	0.035	4.42	5.98	0.045	2.4	Fun	FBgn0038238	CG14854
MI1539	chr2	chr2	+	14869992	14871804	419.05	267.605	0	0	0	0	0	0	Fun	FBgn0038241	CG8087
MI1540	chr2	chr2	+	14874693	14875191	483.685	821.7	2.545	2.52	0	0	0	0.145	Fun
MI1541	chr2	chr2	-	14875240	14876229	519.725	489.73	889.765	790.905	40.445	34.155	3.85	4.025	Fun	FBgn0051313	CG31313
MI1542	chr2	chr2	-	14876964	14877806	453.145	431.945	4750.26	4340.34	314.635	317.62	229.765	201.625	Fun	FBgn0004629	Cys
MI1543	chr2	chr2	-	14879451	14885386	8.335	10.295	13.095	16.965	24.725	9.16	25.25	3.315	Fun	FBgn0038244	CG7987
MI1544	chr2	chr2	+	14886941	14887365	102.1	428.595	0.31	0	0	0	0	0	Fun
MI1545	chr2	chr2	+	14888343	14888740	0	0	0	0	0	0.31	0	0	Sil	FBgn0264903	CG44094
MI1546	chr2	chr2	-	14888752	14889356	0.12	0	0	0	0	117.065	0	4.35	Fun	FBgn0264903	CG44094
MI1547	chr2	chr2	+	14889775	14923079	3.59	2.94	24.245	15.295	7.975	6.165	1.655	1.745	Fun	FBgn0020299	stumps
MI1548	chr2	chr2	+	14927694	14931693	103.955	110.225	118.96	92.87	152.635	146.615	132.405	91.775	Fun	FBgn0038947	Sar1
MI1549	chr2	chr2	-	14930569	14933341	7.68	8.585	13.09	18.045	14.395	7.77	19.635	4.005	Fun	FBgn0038948	PSR
MI1550	chr2	chr2	+	14934095	14936113	27.495	25.875	23.805	38.285	40.07	25.465	45.28	19.46	Fun	FBgn0260467	CG7071
MI1551	chr2	chr2	-	14936026	14942274	53.25	46.72	53.855	64.895	38.83	39.395	65.525	39.755	Fun	FBgn0015282	Rpt2
MI1552	chr2	chr2	+	14937588	14938955	16.05	12.875	21.02	14.035	33.275	13.005	116.31	21	Fun	FBgn0032224	Sps2
MI1553	chr2	chr2	+	14939983	14940882	3.76	4.795	8.955	9.68	6.655	6.66	8.795	9.785	Fun	FBgn0047114	CG31142
MI1554	chr2	chr2	+	14942860	14944127	5.125	5.015	13.2	38.24	6.945	33.475	21.425	40.845	Fun	FBgn0039128	CG13599
MI1555	chr2	chr2	-	14943886	14944648	0.065	0.07	0.14	3.18	0	4.37	0.09	34.115	Fun	FBgn0039129	RpS19b
MI1556	chr2	chr2	+	14945220	14947616	14.755	10.27	72.07	63.4	14.415	6.595	15.245	9.93	Fun	FBgn0039130	CG5854
MI1557	chr2	chr2	-	14947352	14957752	516.83	844.66	52.855	47.84	335.815	157.025	126.78	5.6	Fun	FBgn0001098	Gdh
MI1558	chr2	chr2	-	14956419	14967317	0.265	0.27	13.945	78.06	8.99	19.745	0	0.05	Fun	FBgn0039131	CG12268
MI1559	chr2	chr2	+	14960110	14960910	0	0.055	0	26.84	0	70.27	0	182.43	Fun	FBgn0015286	Rala
MI1560	chr2	chr2	-	14971643	14978314	31.02	28.885	33.39	58.53	39.515	24.68	21.07	10.12	Fun	FBgn0005674	GluProRS
MI1561	chr2	chr2	+	14978883	14983055	35.63	30.575	77.685	58.255	54.085	32.045	67.245	24.145	Fun	FBgn0039132	AP-1sigma
MI1562	chr2	chr2	+	14983891	15007783	4.755	6.225	69.505	43.905	26.48	27.06	0.405	0.425	Dis	FBgn0051140	CG31140
MI1563	chr2	chr2	-	15008237	15009531	19.91	15.3	36.43	37.275	39.255	24.785	134.44	28.355	Fun	FBgn0039135	CG13603
MI1564	chr2	chr2	+	15010041	15012595	48.785	38.08	74.83	74.445	63.24	35.165	100.285	26.595	Fun	FBgn0039136	CG5902
MI1565	chr2	chr2	-	15012366	15016719	7.72	7.59	8.865	9.44	11.085	14.71	2.28	12.97	Fun	FBgn0039137	CG13604
MI1566	chr2	chr2	+	15017983	15019405	0	0	0.18	0.245	0.1	0.065	0	0	Sil
MI1567	chr2	chr2	+	15025288	15031598	103.835	78.83	118.55	108.37	125.2	72.025	325.105	75.565	Fun	FBgn0015795	Rab7
MI1568	chr2	chr2	-	15038316	15047965	5.785	5.49	22.77	35.54	16.245	30.195	23.33	24.79	Fun	FBgn0020647	KrT95D
MI1569	chr2	chr2	+	15076866	15080138	2.94	3.21	10.46	12.125	4.675	3.615	12.755	2.365	Fun	FBgn0039139	Mettl3
MI1570	chr2	chr2	-	15079621	15083236	11.055	10.58	10.075	35.695	22.74	75.495	29.89	86.21	Fun	FBgn0039140	Miro
MI1571	chr2	chr2	+	15083303	15088179	4.225	4.235	14.625	20.465	10.13	6.71	20.74	4.85	Fun	FBgn0039141	spas
MI1572	chr2	chr2	-	15089192	15094611	25.645	24.09	78.735	57.265	54.775	25.165	93.09	8.77	Fun	FBgn0005649	Rox8
MI1573	chr2	chr2	+	15092891	15095790	17.585	14.44	43.015	42.825	34.615	36.61	87.595	31.835	Fun	FBgn0043455	CG5986
MI1574	chr2	chr2	-	15095689	15097605	13.015	10.41	16.705	20.4	10.49	9.53	20.54	6.6	Fun	FBgn0264325	Atg6
MI1575	chr2	chr2	+	15096569	15101041	6.82	6.475	14.17	13.545	22.035	7.825	35.66	2.45	Fun	FBgn0026576	Pisd
MI1576	chr2	chr2	-	15100953	15109013	3.295	5.945	4.09	164.015	2.68	74.61	1.615	57.305	Fun	FBgn0001230	Hsp68
MI1577	chr2	chr2	+	15101445	15114753	5.105	5.965	15.555	26.6	14.375	14.44	22.47	9.075	Fun	FBgn0040283	SMC1
MI1578	chr2	chr2	-	15115120	15166723	12.36	14.79	43.775	29.765	33.39	18.495	39.975	10.275	Fun	FBgn0013343	Syx1A
MI1579	chr2	chr2	+	15164121	15165997	0.02	0.14	0.09	31.84	0.06	60.865	0	83.355	Fun	FBgn0039147	CG10694
MI1580	chr2	chr2	+	15167040	15168117	2.935	2.23	10.72	9.455	6.575	6.725	12.54	3.57	Fun	FBgn0039149	CG18428
MI1581	chr2	chr2	-	15168057	15170592	12.26	12.535	13.57	38.915	15.01	40.09	21.23	33.59	Fun	FBgn0039150	CG13605
MI1582	chr2	chr2	-	15172087	15175461	59.315	72.115	26.41	18.56	25.765	15.3	0.145	0.1	Fun	FBgn0039151	CG13607
MI1583	chr2	chr2	+	15174965	15190541	3.055	3.03	1.08	0.76	1.3	0.38	0	0.06	Fun	FBgn0039152	Root
MI1584	chr2	chr2	-	15190306	15203387	3.365	3.415	7.52	11.725	10.45	8.18	16.63	5.96	Fun	FBgn0039153	GatB
MI1585	chr2	chr2	+	15193098	15197601	10.855	13.82	25.085	23.37	21.925	14.67	17.07	4.52	Fun	FBgn0026317	Tsc1
MI1586	chr2	chr2	+	15198758	15201482	37.095	24.73	23.42	40.885	19.44	30.87	28.415	26.68	Fun	FBgn0266673	Sec10
MI1587	chr2	chr2	+	15205093	15211999	3.16	1.635	21.265	8.62	2.845	0.605	2.855	0.125	Fun	FBgn0039155	Kal1
MI1588	chr2	chr2	-	15211673	15213291	5.215	5.53	7.8	9.18	7.215	3.665	16.975	1.62	Fun	FBgn0051133	Slimp
MI1589	chr2	chr2	-	15213607	15214952	3.935	1.5	0.07	0.505	2.515	2.43	0.09	0.245	Fun	FBgn0015765	p38a
MI1590	chr2	chr2	-	15215147	15216722	31.51	23.945	11.525	12.055	21.895	11.615	47.915	7.275	Fun	FBgn0015765	p38a
MI1591	chr2	chr2	-	15217204	15218224	0.41	0.335	2.33	1.535	0.875	0.655	1.005	0.89	Dis	FBgn0012036	Aldh
MI1592	chr2	chr2	+	15218312	15221962	31.5	38.62	8.09	12.89	24.59	12.415	11.865	4.87	Fun	FBgn0039156	CG6178
MI1593	chr2	chr2	-	15220752	15227418	0.6	0.535	4.425	3.315	4.04	3.8	2.115	1.36	Fun	FBgn0039157	Myo95E
MI1594	chr2	chr2	+	15228050	15230179	4.76	5.225	12.02	17.885	8.55	9.205	13.99	11.21	Fun	FBgn0039158	TBC1d7
MI1595	chr2	chr2	-	15229700	15231153	19.22	23.015	19.115	39.615	50.2	29.345	404.035	99.33	Fun	FBgn0039159	mRpS24
MI1596	chr2	chr2	+	15230543	15234658	3.65	4.775	9.93	15.45	7.755	10.785	21.385	8.39	Fun	FBgn0026598	Apc2
MI1597	chr2	chr2	-	15234327	15236204	30.685	26.17	45.155	56.035	29.06	61.34	46.01	81.065	Fun	FBgn0039160	CG5510
MI1598	chr2	chr2	+	15240003	15251272	0	0	0.095	0.53	3.71	5.52	0	4.23	Fun	FBgn0039161	CG13606
MI1599	chr2	chr2	+	15257217	15259470	6.065	7.8	13.18	22.84	15.795	7.97	26.44	7.76	Fun	FBgn0029503	mora
MI1600	chr2	chr2	-	15258609	15264299	18.74	20.52	69.87	96.69	68.805	186.645	114.105	214.585	Fun	FBgn0266282	jnj
MI1601	chr2	chr2	+	15259540	15278362	15.885	18.865	48.375	76.37	38	34.885	59.49	24.38	Fun	FBgn0039165	CG6204
MI1602	chr2	chr2	+	15298737	15302604	1.9	3.04	5.695	19.19	12.785	12.58	75.78	15.625	Fun	FBgn0026257	cav
MI1603	chr2	chr2	-	15302422	15307018	1.16	1.58	4.385	12.525	3.61	11.25	6.345	9.59	Fun	FBgn0039169	Spps
MI1604	chr2	chr2	+	15307294	15311577	4.125	4.42	10.92	15.415	4.91	6.46	11.685	4.25	Fun	FBgn0038760	MED25
MI1605	chr2	chr2	-	15310482	15311280	187.155	165.03	266.87	193.12	136.045	190.565	675.955	211.475	Fun	FBgn0039172	Spase22-23
MI1606	chr2	chr2	+	15314968	15337785	6.07	6.175	15.905	29.39	17.495	38.65	14.79	25.255	Fun	FBgn0261554	CG42672
MI1607	chr2	chr2	-	15320672	15321347	0.26	0.215	0.59	1.76	0.255	1.535	0.685	1.92	Fun
MI1608	chr2	chr2	-	15337994	15340220	15.335	18.07	21.28	38.785	42.47	25.625	56.2	18.715	Fun	FBgn0039175	beta-PheRS
MI1609	chr2	chr2	+	15351264	15352517	1.53	1.875	0.91	1.495	0	0.03	0	0	Fun	FBgn0010433	ato
MI1610	chr2	chr2	+	15360363	15361387	0.96	1.79	0.465	36.955	3.57	69.955	5.695	273.38	Fun	FBgn0037562	Nazo
MI1611	chr2	chr2	+	15362200	15363102	0	0	0	1.77	0	1.66	0	2.425	Fun
MI1612	chr2	chr2	-	15362202	15363137	101.55	113.59	0.155	0.32	66.355	53.075	0	0.225	Fun	FBgn0037563	CG11672
MI1613	chr2	chr2	+	15363760	15364828	9.7	10.65	0	0.04	4.24	3.625	0	0.135	Fun	FBgn0051464	CG31464
MI1614	chr2	chr2	+	15364884	15366240	31.69	48.385	0.03	0	28.625	12.52	0.065	0	Fun	FBgn0051463	CG31463
MI1615	chr2	chr2	-	15366220	15372773	1.26	1.925	2.08	10.125	2.765	11.135	1.965	7.89	Fun	FBgn0037565	CG9626
MI1616	chr2	chr2	+	15373122	15374987	11.35	14.43	18.66	37.635	52.91	43.405	61.78	27.48	Fun	FBgn0037566	mRpL1
MI1617	chr2	chr2	-	15374913	15378304	33.15	30.345	40.19	55.165	32.995	56.525	48.225	83.005	Fun	FBgn0265101	Sgt1
MI1618	chr2	chr2	+	15377276	15382805	0.265	0.095	0.305	0.2	0.235	1.18	0.695	2.3	Fun
MI1619	chr2	chr2	-	15383083	15384299	8.38	8.6	20.54	41.98	12.395	17.57	20.51	17.225	Fun	FBgn0037569	tex
MI1620	chr2	chr2	-	15384840	15388003	0	0.06	0.775	8.35	0.15	6.455	0	14.79	Fun	FBgn0037570	CG11693
MI1621	chr2	chr2	+	15387759	15388885	0	0.125	0.045	17.725	0	15.3	0	16.335	Fun	FBgn0037572	CG11698
MI1622	chr2	chr2	+	15389088	15390876	30.12	29.45	56.55	59.485	61.455	22.805	85.925	15.81	Fun	FBgn0037573	CG7483
MI1623	chr2	chr2	-	15390737	15392770	3.15	3.375	3.685	4.295	9.93	3.345	52.61	3.045	Fun	FBgn0037574	Coq2
MI1624	chr2	chr2	+	15395031	15405856	499.925	463.04	22.73	15.845	171.835	115.34	0.075	0.33	Fun	FBgn0062412	Ctr1B
MI1625	chr2	chr2	-	15396090	15410136	0.39	0.31	3.095	2.81	0.965	0.88	0.24	0.215	Fun	FBgn0003129	Poxm
MI1626	chr2	chr2	-	15417176	15418119	460.655	541.125	268.69	306.83	486.385	266.095	281.38	181.085	Fun	FBgn0040529	COX7A
MI1627	chr2	chr2	+	15419056	15419963	32.045	32.395	71.775	133.13	42.56	91.515	159.33	200.23	Fun	FBgn0004908	Arl2
MI1628	chr2	chr2	-	15419262	15421748	3.43	3.335	8.195	13.07	6.08	6.495	19.98	5.545	Fun	FBgn0037578	PNKP
MI1629	chr2	chr2	+	15423002	15427215	0	0.425	0.19	144.83	0.145	500.91	0	949.19	Dis	FBgn0037579	COX7AL
MI1630	chr2	chr2	+	15431609	15432993	0.59	1.205	16.995	8.825	2.105	0.74	0.075	0	Fun	FBgn0003065	CG2150
MI1631	chr2	chr2	+	15435375	15437817	6.705	14.875	2.56	1.86	15.35	8.04	0	0.025	Fun	FBgn0039873	Smvt
MI1632	chr2	chr2	+	15438430	15441042	5.89	6.01	0.6	0.205	8.625	4.975	0	0.095	Fun	FBgn0017448	CG2187
MI1633	chr2	chr2	+	15442219	15444930	6.51	4.425	0.575	0.19	2.77	0.77	0	0	Fun	FBgn0039872	salt
MI1634	chr2	chr2	-	15445864	15480337	2.9	2.675	13.495	13.445	9.8	9.42	0.225	3.835	Fun	FBgn0038652	CG7720
MI1635	chr2	chr2	-	15484126	15489766	0.04	0.05	1.05	0.5	0.315	0.42	0	0.09	Fun
MI1636	chr2	chr2	-	15493867	15537876	0.09	0.04	0.28	0.08	0.36	0.275	0.04	0.03	Sil	FBgn0038653	Octalpha2R
MI1637	chr2	chr2	+	15562640	15564038	2.465	3.01	0.605	0.475	13.815	5.675	1.885	0.125	Fun	FBgn0038654	CG14298
MI1638	chr2	chr2	+	15583289	15586629	0.055	0.06	0.105	9.64	3.515	54.69	0.07	91.48	Fun	FBgn0003248	Rh2
MI1639	chr2	chr2	-	15586631	15587194	151.505	211.335	0.235	0.105	103.385	66.43	0	1.16	Fun	FBgn0085313	CG34284
MI1640	chr2	chr2	+	15591581	15597908	0	0	0	0	0	0.015	0	0.02	Sil
MI1641	chr2	chr2	-	15599665	15600477	495.29	643.26	8.9	15.275	82.805	44.77	0.07	1.855	Fun	FBgn0038658	CG14292
MI1642	chr2	chr2	-	15600571	15601784	0	0.105	0	20.195	0.065	74.6	0	149.455	Fun
MI1643	chr2	chr2	+	15602294	15606163	5.945	6.62	13.505	10.555	24.15	24.54	16.54	12.51	Fun	FBgn0038659	EndoA
MI1644	chr2	chr2	-	15607019	15609201	13.76	11.56	74.445	44.15	8.715	1.315	3.535	0.255	Fun	FBgn0038660	Sgsh
MI1645	chr2	chr2	+	15611488	15624171	42.215	48.495	33.63	44.21	62.315	41.535	8.78	8.025	Dis	FBgn0261113	Xrp1
MI1646	chr2	chr2	-	15624166	15625760	35.905	47.29	45.68	52.605	228.1	257.385	20.825	240.03	Fun	FBgn0038662	Mpc1
MI1647	chr2	chr2	+	15627378	15671196	1.015	1.285	11.985	6.76	14.285	13.52	0	1.76	Dis	FBgn0261262	CG42613
MI1648	chr2	chr2	-	15671244	15674088	4.145	5.405	19.235	19.91	10.485	7.53	10.875	3.055	Fun	FBgn0038666	Smu1
MI1649	chr2	chr2	+	15674094	15676800	7.19	6.695	14.375	11.785	12.19	3.74	71.385	1.98	Fun	FBgn0022338	dnk
MI1650	chr2	chr2	-	15675675	15676709	22.42	16.555	53.765	51.11	28.7	20.255	53.94	24.7	Fun	FBgn0261792	snRNP-U1-C
MI1651	chr2	chr2	+	15677379	15720496	1.94	1.835	14.23	9.49	5.33	2.12	6.405	0.74	Fun	FBgn0026239	gukh
MI1652	chr2	chr2	-	15720224	15721969	5.115	4.675	10.925	18.53	6.75	11.425	27.34	15.22	Fun	FBgn0038672	CG6005
MI1653	chr2	chr2	+	15725865	15730732	2.885	2.715	5.745	9.66	12.195	12.41	8.44	6.985	Fun	FBgn0039260	Smg6
MI1654	chr2	chr2	+	15730981	15732612	0.04	0.095	0.195	0.085	16.71	0.19	43.435	0.15	Fun
MI1655	chr2	chr2	-	15733469	15826590	14.59	15.95	251.94	134.895	23.81	6.465	29.43	3.37	Fun	FBgn0011224	heph
MI1656	chr2	chr2	+	15737531	15753459	0	0.03	5.665	1.59	0.03	0.015	0.02	0	Fun
MI1657	chr2	chr2	+	15831254	15832109	0.05	0.155	4.47	3.455	0	0	0	0	Fun
MI1658	chr2	chr2	+	15910964	15917370	3.89	3.245	2.88	3.4	5.145	3	3.92	3.955	Fun	FBgn0039886	CG2003
MI1659	chr2	chr2	+	15925031	15929389	0.15	2.52	0.735	13.89	0.025	5.445	0	4.935	Fun
MI1660	chr2	chr2	+	15944775	15952644	0	0	0	0	0.05	0	0	0.135	Sil	FBgn0035782	CG14835
MI1661	chr2	chr2	-	15955966	15956829	0	3.015	0	35.905	9.465	16.805	45.475	25.535	Dis	FBgn0036799	CG13380
MI1662	chr2	chr2	+	15957335	15961380	0.02	0.42	0	5.18	0.455	3.055	1.82	2.925	Fun	FBgn0028887	CG3491
MI1663	chr2	chr2	+	15987778	15989190	0	2.22	0.06	58.685	0.165	24.185	0.25	27.235	Fun	FBgn0039887	CG2053
MI1664	chr2	chr2	+	15993422	16001224	9.545	18.085	1.815	20.585	7.36	89.99	1.895	157.655	Fun
MI1665	chr2	chr2	-	16002420	16009755	7.13	6.27	10.48	11.665	11.17	6.985	10.32	3.1	Fun	FBgn0040206	krz
MI1666	chr2	chr2	+	16004348	16012171	16.845	24.32	40.275	54.285	131.96	16.3	93.32	9.84	Fun	FBgn0002780	mod
MI1667	chr2	chr2	-	16012641	16035424	39.015	44.455	104.96	85.305	27.845	19.925	25.2	8.735	Dis	FBgn0002645	Map205
MI1668	chr2	chr2	+	16036563	16052678	10.79	10.415	25.96	36.865	17.29	65.53	15.465	120.815	Fun	FBgn0261550	CG42668
MI1669	chr2	chr2	-	16053322	16056995	5.785	6.415	14.89	15.91	22.945	10.35	28.91	4.55	Dis	FBgn0038787	CG4360
MI1670	chr2	chr2	+	16054477	16055293	0	0	0	0.05	0.26	2.23	0	0.815	Fun
MI1671	chr2	chr2	+	16057083	16058692	6.64	6.72	14.02	23.58	11.66	13.735	6.23	9.235	Fun	FBgn0038788	Sirt2
MI1672	chr2	chr2	+	16069525	16089647	0.015	0	0	0	0	0.065	0	0.055	Sil-Dis	FBgn0038789	Ir92a
MI1673	chr2	chr2	+	16099170	16111962	0	0.33	0.06	69.145	0	28.92	0	59.23	Fun	FBgn0262732	mbf1
MI1674	chr2	chr2	-	16110182	16118554	0.07	0.065	1.735	0.775	2.175	2.21	0	0.135	Fun	FBgn0262869	Gfrl
MI1675	chr2	chr2	-	16137395	16138870	4.155	6.625	3.505	4.03	6.675	3.66	0	0.39	Fun	FBgn0038795	CG4335
MI1676	chr2	chr2	+	16139100	16140737	0	0.21	0	63.215	0.03	99.275	0	188.57	Fun	FBgn0038796	eIF3g2
MI1677	chr2	chr2	+	16142754	16144535	0	0.045	0	13.665	0	27.33	0	36.57	Dis	FBgn0038744	CG4733
MI1678	chr2	chr2	-	16167355	16169953	0	0	0	0	0.16	0.11	0	0	Sil-Dis	FBgn0262869	Gfrl
MI1679	chr2	chr2	-	16228023	16230129	0	0.08	0	37.615	0	111.87	0	309.53	Fun	FBgn0038797	Dic2
MI1680	chr2	chr2	-	16232853	16237299	17.065	22.985	0.44	1.46	10.27	26.295	0.04	44.37	Fun	FBgn0038799	MFS9
MI1681	chr2	chr2	-	16256409	16274056	30.83	37.53	18.28	19.24	51.23	22.97	29.165	8.395	Fun	FBgn0016917	Stat92E
MI1682	chr2	chr2	+	16260501	16262019	0.025	0	0.025	0.98	0	1.415	0	2.81	Fun
MI1683	chr2	chr2	-	16279520	16279826	0	0	0	0	0	0	0	0	Sil-Dis	FBgn0030320	CG2247
MI1684	chr2	chr2	+	16281148	16282476	0	0	0	4.91	0	14.915	0	24.9	Fun
MI1685	chr2	chr2	+	16282717	16284017	43.93	45.85	48.405	84.365	61.065	53.22	58.305	49.395	Fun	FBgn0026400	Noa36
MI1686	chr2	chr2	+	16298081	16302733	5.025	5.335	9	6.385	4.11	2.82	0	0.02	Fun	FBgn0000659	fkh
MI1687	chr2	chr2	+	16329780	16340455	0	0.03	0	0.075	0	0.08	0	0.065	Sil
MI1688	chr2	chr2	-	16343910	16345088	26.96	32.47	49.335	79.875	47.675	45.095	26.38	27.48	Fun	FBgn0260464	CG9288
MI1689	chr2	chr2	+	16345285	16352947	223.6	230.385	210.495	170.425	163.175	86.485	195.365	75.08	Fun	FBgn0000454	Dip-B
MI1690	chr2	chr2	+	16356900	16364965	0	0	0.035	0.015	0.015	0.015	0	0	Sil
MI1691	chr2	chr2	-	16402561	16406262	6.7	7.33	9.15	9.8	13.405	10.02	13.3	3.135	Fun	FBgn0266464	Nsf2
MI1692	chr2	chr2	-	16407234	16409156	3.52	2.71	5.69	10.695	8.885	4.01	22.69	3.48	Fun	FBgn0037435	CG18048
MI1693	chr2	chr2	+	16409847	16410618	47.38	45.965	114.775	131.45	98.765	68	219.4	120.27	Fun	FBgn0261789	SmD2
MI1694	chr2	chr2	-	16410551	16413638	11.66	13.405	366.395	535.945	51.535	69.475	0	110.575	Fun	FBgn0037432	CG10298
MI1695	chr2	chr2	-	16413688	16416669	0	0	0.015	0.195	0	0.305	0.015	0.355	Sil	FBgn0037430	Osi20
MI1696	chr2	chr2	-	16420272	16422039	0	0	0	0	0	0.08	0	0	Sil	FBgn0037429	Osi19
MI1697	chr2	chr2	-	16424672	16425999	0	0	0	0	0	0	0	0	Sil	FBgn0037428	Osi18
MI1698	chr2	chr2	-	16428810	16443019	0.095	0.08	0.15	0.1	0.02	0.045	0	0.075	Sil	FBgn0037427	Osi17
MI1699	chr2	chr2	+	16443310	16444297	0	0	0	0	0	0.05	0	0	Sil	FBgn0051560	CG31560
MI1700	chr2	chr2	-	16445829	16448459	0	0	0	0.025	0	0.095	0	0	Sil	FBgn0051561	Osi16
MI1701	chr2	chr2	-	16449078	16449659	0	0	0.09	0	0	0	0	0	Sil	FBgn0286874	CG46396
MI1702	chr2	chr2	-	16450326	16451939	0	0	0	0.055	0	0.025	0	0	Sil	FBgn0037424	Osi15
MI1703	chr2	chr2	-	16453264	16454553	5.625	4.03	0.16	0.55	0.07	0.535	0.09	0.525	Fun	FBgn0040279	Osi14
MI1704	chr2	chr2	+	16454127	16454846	0	0	0	1.745	0	5.945	0	46.435	Dis
MI1705	chr2	chr2	-	16459495	16462639	0	0	0.06	0.02	0	0	0	0	Sil	FBgn0037422	Osi13
MI1706	chr2	chr2	-	16462771	16464419	0	0	0.05	0.28	0.12	0.455	0	0.275	Sil	FBgn0037421	CG15594
MI1707	chr2	chr2	+	16466726	16467665	185.05	445.04	1.535	0.05	0	0	0	0	Fun
MI1708	chr2	chr2	-	16468725	16472409	0	0	2.195	0.12	0	0.06	0	0.205	Fun	FBgn0037419	Osi12
MI1709	chr2	chr2	+	16481929	16483053	0	0	0.155	0.035	0	0	0	0	Sil	FBgn0037418	Osi11
MI1710	chr2	chr2	-	16483078	16484418	0	0.03	0	0.055	0	0.025	0	0	Sil-Dis	FBgn0286977	Osi10b
MI1711	chr2	chr2	-	16484656	16485968	0.03	0	0.035	0.03	0	0	0.035	0	Sil	FBgn0286976	Osi10a
MI1712	chr2	chr2	-	16488264	16490810	1.955	1.27	1.375	0.83	1.175	0.7	0.1	0.08	Fun	FBgn0037416	Osi9
MI1713	chr2	chr2	-	16493356	16497718	0	0	0.195	0.015	0	0.025	0	0	Sil	FBgn0037415	Osi8
MI1714	chr2	chr2	-	16497999	16501878	0.01	0	0.74	0.77	0.03	0.01	0	0.015	Sil	FBgn0037414	Osi7
MI1715	chr2	chr2	-	16513229	16514654	0.11	0.12	0.67	2.305	0	0.12	0	0.095	Fun	FBgn0027527	Osi6
MI1716	chr2	chr2	-	16520402	16521998	0	0	0.03	0.08	0	0.025	0	0.125	Sil	FBgn0037413	Osi5
MI1717	chr2	chr2	-	16530770	16532606	0	0	3.64	0.345	0	0	0	0	Fun	FBgn0037411	Osi3
MI1718	chr2	chr2	-	16534819	16536968	0.165	0.105	1.835	1.51	0.125	0.125	0	0	Fun	FBgn0037410	Osi2
MI1719	chr2	chr2	-	16541413	16549048	0.625	0.405	0.31	0.285	1.41	1.02	0.46	1.51	Fun	FBgn0037409	Osi24
MI1720	chr2	chr2	-	16552503	16562353	20.43	27.535	0.205	0.125	16.115	13.82	0.1	0.12	Fun	FBgn0037408	NPFR
MI1721	chr2	chr2	-	16565779	16573848	0	0.01	0.02	0.07	0.01	0.085	9.25	0.09	Fun	FBgn0037405	CG1077
MI1722	chr2	chr2	+	16575129	16581058	0	0	0.55	0.205	0.035	0.02	0.15	0	Sil	FBgn0051559	CG31559
MI1723	chr2	chr2	-	16606459	16607791	0	0.125	0	21.375	0.08	24.685	0	21.05	Fun	FBgn0262512	Vha14-1
MI1724	chr2	chr2	+	16617057	16618913	63.29	76.14	100.53	102.84	29.31	15.93	0.025	0.115	Fun	FBgn0046876	Obp83ef
MI1725	chr2	chr2	+	16626444	16634678	87.7	100.58	83.945	274.87	44.085	34.07	0.33	1.09	Fun	FBgn0026077	Gasp
MI1726	chr2	chr2	+	16662203	16663110	0	0	0	0.805	0	3.895	0	15.135	Dis
MI1727	chr2	chr2	+	16663837	16667864	0	0	0	5.575	0	15.62	0	13.275	Fun	FBgn0037398	CG15580
MI1728	chr2	chr2	+	16696670	16697899	0.13	0.28	0.295	0.22	1.435	0.115	2.455	0.285	Fun	FBgn0037395	CG10280
MI1729	chr2	chr2	-	16697674	16699292	12.485	16.275	39.825	43.19	37.035	19.51	165.53	81.62	Fun	FBgn0261791	SNRPG
MI1730	chr2	chr2	+	16699371	16706975	107.75	108.26	170.89	191.725	285.13	144.37	291.71	140.945	Fun	FBgn0003261	Rm62
MI1731	chr2	chr2	-	16716295	16717382	0	0	0.04	19.21	0.035	15.57	0	21.72	Dis	FBgn0082598	akirin
MI1732	chr2	chr2	+	16731502	16732173	0	0	0	2.315	21.535	40.22	0.255	12.415	Fun	FBgn0010403	Obp83b
MI1733	chr2	chr2	+	16732867	16735391	0	0	0	0.15	10.655	15.17	0	0.24	Fun	FBgn0011281	Obp83a
MI1734	chr2	chr2	+	16745272	16746128	0	0.145	0	64.195	0	113.85	0	290.835	Fun
MI1735	chr2	chr2	+	16749015	16750301	0	0	0	2.435	0	3.765	0	5.465	Fun
MI1736	chr2	chr2	+	16819554	16836960	0.095	0.055	1.905	8.96	0.97	18.22	0.08	12.81	Dis	FBgn0083949	side-III
MI1737	chr2	chr2	+	16840031	16843874	14.875	15.675	11.56	9.935	22.31	16.615	8.165	3.11	Fun	FBgn0037391	CG2017
MI1738	chr2	chr2	-	16843779	16845524	6.095	6.715	9.015	29.15	14.195	39.355	15.63	56.92	Fun	FBgn0028436	ECSIT
MI1739	chr2	chr2	+	16845611	16851826	1.97	1.915	9.035	8.49	5.91	5.15	11	3.25	Fun	FBgn0029088	disp
MI1740	chr2	chr2	-	16847288	16848268	0	0	0	7.26	0.08	65.31	0	326.505	Fun	FBgn0037388	CG14676
MI1741	chr2	chr2	-	16851294	16856839	186.655	348.43	6.305	6.645	781.98	638.405	1.27	6.31	Fun	FBgn0030332	CG9360
MI1742	chr2	chr2	-	16860165	16862846	7.695	2.77	10.95	7.98	243.92	253.61	0.87	52.345	Fun	FBgn0037387	CG1213
MI1743	chr2	chr2	-	16866849	16870834	9.645	14.88	1.865	9.785	23.455	36.5	0.325	53.735	Fun	FBgn0037386	CG1208
MI1744	chr2	chr2	-	16876480	16877599	0	0.295	0	24.75	0.08	71.775	0	183.915	Fun
MI1745	chr2	chr2	-	16877693	16920496	0.27	0.275	4.705	2.67	1.095	1.125	0.005	0.515	Fun	FBgn0039883	RhoGAP100F
MI1746	chr2	chr2	+	16922050	16923930	0	0.285	0	1.805	0	0.44	0	0.43	Fun	FBgn0005616	msl-2
MI1747	chr2	chr2	+	16925149	16926905	19.97	16.79	38.545	29.67	35.95	16.45	30.79	6.385	Fun	FBgn0266268	FeCH
MI1748	chr2	chr2	+	16927323	16930707	31.15	17.59	5.07	6.165	10.42	5.48	4.745	4.555	Fun	FBgn0039882	Rift
MI1749	chr2	chr2	-	16930859	16933190	0	0.315	0	71.155	0.015	307.05	0.045	690.13	Fun	FBgn0039881	CG1971
MI1750	chr2	chr2	+	16932125	16938783	0.51	0.645	2.77	6.08	1.905	5.665	5.065	4.44	Fun	FBgn0250755	CG42233
MI1751	chr2	chr2	-	16935322	16937358	0.035	0.095	0.16	1.76	0.07	1.35	0.065	1.25	Fun	FBgn0039879	Ir100a
MI1752	chr2	chr2	-	16938082	16944896	1.63	2.535	6.85	21.825	7.755	15.615	18.635	10.35	Fun	FBgn0027620	Acf
MI1753	chr2	chr2	+	16945345	16949910	3.09	3.69	12.58	13.115	11.055	4.87	31.35	2.515	Fun	FBgn0011474	PR-Set7
MI1754	chr2	chr2	-	16949307	16956643	2.275	2.81	6.325	8.19	8.91	11.46	16.495	10.71	Dis	FBgn0038223	Afti
MI1755	chr2	chr2	+	16955122	16956686	136.515	192.225	99.205	105.1	504.545	398.42	100.285	120.76	Fun	FBgn0038224	ATPsynE
MI1756	chr2	chr2	+	16956737	16958527	0.775	0.68	1.965	2.4	2.015	1.095	14.88	2.97	Fun	FBgn0003480	spn-B
MI1757	chr2	chr2	-	16958177	16981726	1.76	2.17	8.27	19.69	5.245	10.095	3.04	6.665	Fun	FBgn0024321	NK7.1
MI1758	chr2	chr2	-	16989985	16993387	0.995	1.805	2.84	70.17	5.15	74.95	10.53	57.18	Fun	FBgn0051320	HEATR2
MI1759	chr2	chr2	-	17016552	17017266	0	0.065	0	54.48	0	253.44	0	532.375	Fun	FBgn0038225	soti
MI1760	chr2	chr2	+	17020875	17021924	0	0.085	0	24.15	0	14.01	0	16.44	Fun	FBgn0267347	squ
MI1761	chr2	chr2	-	17030745	17057410	3.93	3.61	16.365	16.17	6.64	10.32	2.68	5.41	Fun	FBgn0285955	cv-c
MI1762	chr2	chr2	+	17057884	17062066	0.145	0.125	4.565	2.255	0.205	0.24	0	0.085	Dis	FBgn0085417	natalisin
MI1763	chr2	chr2	-	17066861	17085785	0	0	0.035	0.05	0	0.14	0	0	Sil	FBgn0285955	cv-c
MI1764	chr2	chr2	+	17104193	17106131	16.72	16.29	66.48	42.43	4.71	1.965	0	0.42	Fun
MI1765	chr2	chr2	-	17157638	17159898	6.225	5.295	6.41	27.16	5.05	23.79	9.93	23.575	Fun	FBgn0038233	HtrA2
MI1766	chr2	chr2	+	17160836	17163090	0.035	0.035	0.3	0.165	0.235	0.1	0	0	Sil	FBgn0038929	CG13408
MI1767	chr2	chr2	-	17164714	17213341	14.14	17.32	62.475	38.515	28.645	13.925	19.835	3.905	Fun	FBgn0264491	how
MI1768	chr2	chr2	-	17217516	17220328	9.545	11.39	8.615	20.37	64.175	13.685	76.97	11.2	Fun	FBgn0030855	CG5800
MI1769	chr2	chr2	-	17221151	17222827	2.815	1.89	4.57	3.81	4.56	1.86	9.605	1.06	Dis	FBgn0038928	Fadd
MI1770	chr2	chr2	+	17221598	17225803	8.615	8.3	16.78	34.025	12.05	21.74	23.18	20.105	Fun	FBgn0038927	CG6015
MI1771	chr2	chr2	-	17223256	17224143	0	0	0.1	0.315	0	2.215	0	5.26	Dis
MI1772	chr2	chr2	-	17225802	17228073	0.46	0.385	5.835	3.685	2.26	2.015	0	0.345	Fun	FBgn0038926	CG13409
MI1773	chr2	chr2	-	17228312	17230107	69.695	89.645	48.515	81.375	255.25	178.945	55.35	38.61	Fun	FBgn0019957	ND-42
MI1774	chr2	chr2	+	17229787	17231637	11.43	16.715	19.935	37.765	50.37	50.695	27.615	35.215	Fun	FBgn0038925	Cchl
MI1775	chr2	chr2	+	17232299	17235477	13.865	9.57	38.125	28.77	4.72	2.275	20.115	2.69	Fun	FBgn0019972	Drice
MI1776	chr2	chr2	-	17233991	17236353	104.33	117.755	75.02	53.35	115.475	64.985	40.29	9.6	Fun	FBgn0039697	CG7834
MI1777	chr2	chr2	+	17235601	17237261	18.265	19.355	27.085	31.175	28.4	22.28	83.235	22.575	Fun	FBgn0039698	CG7789
MI1778	chr2	chr2	-	17237048	17240306	3.635	3.61	8.425	24	5.07	10.065	20.54	7.695	Fun	FBgn0002924	ncd
MI1779	chr2	chr2	+	17239727	17249085	5.695	7.065	8.045	34.905	10.145	23.345	13.89	13.545	Fun	FBgn0000247	ca
MI1780	chr2	chr2	-	17248472	17250574	5.735	5.125	11.195	15.115	7.895	4.47	21.125	2.75	Fun	FBgn0039702	Vps16B
MI1781	chr2	chr2	+	17250593	17251419	7.385	8.23	27.57	46.225	17.03	49.905	50.58	138.24	Fun	FBgn0031043	Naa20A
MI1782	chr2	chr2	-	17251354	17253814	3.705	2.94	8.755	11.845	8.835	6.75	15.42	4.465	Fun	FBgn0032763	CG17568
MI1783	chr2	chr2	-	17254976	17257032	4.56	5.49	13.115	20.47	11.47	7.19	26.88	5.06	Fun	FBgn0001990	wek
MI1784	chr2	chr2	+	17257774	17261934	0.095	0.04	0.33	0.115	0.115	0.095	0.17	0.03	Fun
MI1785	chr2	chr2	-	17263076	17264186	5.995	5.745	16.915	13.92	13.945	7.35	22.625	5.63	Fun	FBgn0033951	CG10139
MI1786	chr2	chr2	+	17263152	17265905	5.395	5.94	13.075	14.77	31.16	4.595	32.995	2.865	Fun	FBgn0032620	CG12288
MI1787	chr2	chr2	-	17267973	17272851	4.085	4.065	5.585	17.445	12.29	67.64	31.485	104.77	Fun	FBgn0039705	Atg16
MI1788	chr2	chr2	+	17272905	17275090	11.695	9.715	11.455	40.03	28.255	87.39	17.87	117.89	Fun	FBgn0037611	CG11755
MI1789	chr2	chr2	-	17274803	17280686	51.325	51.645	44.885	51.71	59.805	48.025	23.96	30.715	Fun	FBgn0037298	Sccpdh1
MI1790	chr2	chr2	+	17279708	17284521	13.475	19.66	115.73	162.62	59.925	136.705	143.825	150.085	Fun	FBgn0038476	kuk
MI1791	chr2	chr2	+	17285760	17289330	0.99	1.845	3.445	11.25	25.005	6.99	62.015	5.005	Fun	FBgn0260399	gwl
MI1792	chr2	chr2	-	17289045	17297702	4.94	4.875	9.325	9.64	5.865	3.99	5.16	1.475	Fun	FBgn0038651	Epg5
MI1793	chr2	chr2	-	17299800	17352971	31.855	33.75	66.975	229.955	77.55	196.435	84.03	132.465	Fun	FBgn0022349	CG1910
MI1794	chr2	chr2	+	17330887	17334219	0.01	0.02	0.505	0	0.06	0	0	0	Fun
MI1795	chr2	chr2	+	17353072	17354754	11.575	11.565	8.8	18.13	25.26	17.185	69.045	21.34	Fun	FBgn0261479	nero
MI1796	chr2	chr2	+	17357236	17358357	676.205	681.315	822.095	593.285	1182.73	225.99	5214.73	84.945	Fun	FBgn0000150	awd
MI1797	chr2	chr2	-	17357262	17359592	15.53	13.8	22.7	25.35	28.08	17.395	61.695	39.585	Fun	FBgn0039869	CG1890
MI1798	chr2	chr2	-	17359688	17364760	6.02	9.57	204.675	152.735	175.7	158.265	0.755	18.96	Fun	FBgn0000557	eEF1alpha2
MI1799	chr2	chr2	+	17359733	17361926	0	0	2.325	0.485	0.165	0.065	0	0.055	Fun
MI1800	chr2	chr2	-	17365043	17365972	20.415	18.895	30.165	38.105	98.775	16.605	149.265	20.055	Fun	FBgn0039868	CG11563
MI1801	chr2	chr2	+	17372821	17375093	8.92	9.09	19.905	23.655	10.72	8.555	20.32	5.195	Fun	FBgn0039867	CstF50
MI1802	chr2	chr2	-	17374951	17387174	7.37	7.275	37.645	21.645	17.605	8.115	18.36	2.605	Fun	FBgn0003870	ttk
MI1803	chr2	chr2	+	17405550	17410948	0.085	0.115	0.08	14.2	0.085	69.74	0.355	110.05	Fun	FBgn0034464	CG11018
MI1804	chr2	chr2	-	17418996	17425222	0	0.01	0	0	0	0	0	0	Sil
MI1805	chr2	chr2	+	17440280	17442852	0.47	0.47	2.595	1.725	4.75	3.17	0.055	0.695	Fun	FBgn0039864	CG11550
MI1806	chr2	chr2	-	17442570	17450981	3.57	4.57	9.975	18.51	13.435	14	14.595	6.635	Dis	FBgn0039863	CG1815
MI1807	chr2	chr2	-	17456887	17463561	0.08	0.11	2.95	1.73	1.135	1.12	0	0.04	Fun	FBgn0039862	kek6
MI1808	chr2	chr2	-	17503693	17506236	2.465	2.85	6.38	11.885	8.715	14.415	11.07	14.525	Dis	FBgn0039861	pasha
MI1809	chr2	chr2	-	17509896	17511747	17.405	21.86	5.14	12.845	0	0.67	0	0.93	Fun	FBgn0038151	yellow-e2
MI1810	chr2	chr2	-	17514692	17519453	37.27	35.265	0.19	0.4	4.21	3.22	0	0	Fun	FBgn0041711	yellow-e
MI1811	chr2	chr2	+	17524303	17527507	0.03	0.01	0.025	0.01	0.01	0	0	0	Sil	FBgn0038153	Ir87a
MI1812	chr2	chr2	+	17530138	17531909	879.65	1745.38	35.445	39.315	570.29	706.03	22.825	287.845	Fun	FBgn0000046	Act87E
MI1813	chr2	chr2	-	17532387	17538418	4.6	3.94	11.4	13.09	9.655	9.495	17.165	5.745	Fun	FBgn0004049	yrt
MI1814	chr2	chr2	-	17543681	17544675	0	0	0	2.59	0	3.015	0	3.28	Fun
MI1815	chr2	chr2	+	17550267	17551433	0	0	0.2	9.525	0	43.06	0	125.915	Fun	FBgn0038208	CG14355
MI1816	chr2	chr2	+	17555994	17568108	0.58	0.66	8.17	4.98	2.52	2.835	0.305	1.055	Fun	FBgn0038156	side-IV
MI1817	chr2	chr2	+	17581425	17582576	0	0	0	1.915	0	4.56	0	9.75	Fun
MI1818	chr2	chr2	+	17591782	17626181	0	0	0	0.015	0	0.185	0	0.255	Sil
MI1819	chr2	chr2	-	17645584	17646931	3.415	2.025	7.11	2.9	0.04	0	0	0	Fun	FBgn0051337	CG31337
MI1820	chr2	chr2	+	17672172	17686926	0	0	0	0.01	0	0	0	0.015	Sil
MI1821	chr2	chr2	-	17689650	17690211	0	0	0	0	0	0.08	0	0.12	Sil	FBgn0038159	CG14369
MI1822	chr2	chr2	-	17702477	17702947	230.2	119.275	0	0	0.33	0.215	0	0	Dis
MI1823	chr2	chr2	-	17703625	17707960	1028.2	1450.38	0.44	0.19	5.425	3.37	0	0	Fun
MI1824	chr2	chr2	+	17713171	17713742	9.375	7.48	4.5	1.54	0.735	0.4	0	0.095	Fun	FBgn0038161	CG9269
MI1825	chr2	chr2	-	17719423	17720201	0	0.075	0.155	0	3.29	2.915	0.8	0.08	Dis
MI1826	chr2	chr2	-	17722931	17724295	0	0.03	0	1.995	0	8.255	0	11.715	Fun
MI1827	chr2	chr2	+	17730745	17733761	0	0	0.36	19.34	0	132.255	0	178.24	Fun	FBgn0038163	CG10841
MI1828	chr2	chr2	-	17733720	17744627	28.675	32.555	70.88	65.87	100.095	23.435	117.885	13.86	Fun	FBgn0263396	sqd
MI1829	chr2	chr2	+	17746136	17767847	46.95	50.065	152.42	171.12	147.02	128.735	190.97	102.655	Fun	FBgn0015778	rin
MI1830	chr2	chr2	-	17755649	17761452	41.015	46.405	118.87	108.825	61.815	69.215	78.685	99.48	Fun	FBgn0004237	Hrb87F
MI1831	chr2	chr2	-	17770014	17778827	2.315	1.99	7.12	10.86	2.755	8.865	3.095	9.94	Fun	FBgn0038165	Task6
MI1832	chr2	chr2	+	17779948	17783587	5.82	5.795	12.07	24.625	16.33	27.465	22.12	23.05	Fun	FBgn0038167	Lkb1
MI1833	chr2	chr2	-	17782811	17787398	2.875	3.64	7.665	14.48	6.575	7.69	7.77	4.71	Fun	FBgn0038168	omd
MI1834	chr2	chr2	+	17794862	17809280	10.935	11.115	22.66	46.245	21.585	36.955	11.45	45.36	Fun	FBgn0037534	ELOVL
MI1835	chr2	chr2	+	17812178	17813462	0	0.07	0.035	1.01	0.03	81.945	0.28	9.03	Fun	FBgn0259974	Sfp84E
MI1836	chr2	chr2	-	17813343	17814374	0.05	0.1	0.32	0.145	10.83	14.975	0.725	0.64	Fun	FBgn0010401	Os-C
MI1837	chr2	chr2	+	17814612	17819217	67.53	53.64	51.495	57.775	85.27	30.74	178.91	20.475	Fun	FBgn0037533	CD98hc
MI1838	chr2	chr2	+	17826633	17877201	1.215	1.445	1.7	2.07	7.965	5.885	0.85	1.135	Fun	FBgn0000504	dsx
MI1839	chr2	chr2	-	17876593	17881107	3.61	3.455	8.605	8.84	11.195	6.7	21.685	3.725	Fun	FBgn0002542	lds
MI1840	chr2	chr2	+	17881745	17886052	2.55	3.485	8.59	18.61	10.165	16.845	12.2	12.45	Fun	FBgn0037531	CG10445
MI1841	chr2	chr2	-	17886875	17891631	232.705	211.03	235.39	222.99	475.625	207.26	149.62	116.475	Fun	FBgn0037607	CG8036
MI1842	chr2	chr2	+	17886960	17888136	0	0	1.325	0.17	0.035	2.155	0	0.2	Fun
MI1843	chr2	chr2	+	17903273	17907690	10.07	12.205	3.51	5.63	4.46	4.02	0.17	1.25	Dis	FBgn0015011	AhcyL2
MI1844	chr2	chr2	-	17918140	17927901	0	0	0	0	0	0.01	0	0	Sil-Dis
MI1845	chr2	chr2	-	17936825	17939780	0	0.015	0.075	0.15	0.02	0.435	0	0.74	Sil
MI1846	chr2	chr2	-	17939832	17941520	0	0.035	0.025	0.21	0.05	0.37	0	0.65	Sil
MI1847	chr2	chr2	-	17941738	17945010	0	0.04	0.13	0.29	0.295	0.95	0.065	0.95	Fun
MI1848	chr2	chr2	-	17945062	17946980	0.02	0.03	0.055	0.11	0.125	0.315	0	0.435	Sil
MI1849	chr2	chr2	-	17947885	17952860	0.015	0	0.34	0.005	0.1	0.03	0.015	0.01	Sil
MI1850	chr2	chr2	+	17955861	17961896	0.01	0	0.015	0.03	0.16	0.07	0.07	0.065	Sil-Dis
MI1851	chr2	chr2	-	17961927	17962621	0	0	0	0.375	0	2.245	0.15	22.615	Dis
MI1852	chr2	chr2	-	17970422	18029808	4.135	7.63	10.11	42.58	9.185	30.63	51.58	21.295	Dis	FBgn0053865	His2A:CG33865
MI1853	chr2	chr2	-	17973016	17975650	0.025	0.055	0.185	0.42	0.435	0.785	0.04	1.085	Fun
MI1854	chr2	chr2	-	17975835	17980470	0.085	0.04	0.25	0.735	0.105	0.965	0.035	1.47	Fun
MI1855	chr2	chr2	-	17982207	17985990	0.08	0.125	0.175	0.34	0.155	0.305	0.015	0.095	Sil
MI1856	chr2	chr2	-	17986219	17989450	0	0	0.04	0.095	0	0.92	0	1.94	Fun
MI1857	chr2	chr2	+	17991364	17993222	0	0.035	0.105	0.1	0.105	0.03	0.07	0	Sil-Dis
MI1858	chr2	chr2	+	17998052	17999138	0	0	0.11	0.095	0.045	0.105	0.055	0	NA
MI1859	chr2	chr2	-	18003972	18005140	0	0	0.23	0.09	0	0.095	0.27	0.05	Sil	FBgn0053864	His1:CG33864
MI1860	chr2	chr2	-	18005300	18006860	0	0	0	0	0	0	0	0	Sil	FBgn0053866	His3:CG33866
MI1861	chr2	chr2	+	18006961	18049734	14.485	13.615	19.5	28.775	8.32	5.38	245.41	12.66	Fun	FBgn0053909	His4:CG33909
MI1862	chr2	chr2	+	18009451	18009960	0	0	0	0	0	0	0	0	Sil	FBgn0053910	His2B:CG33910
MI1863	chr2	chr2	-	18009979	18011150	0	0	0	0.08	0	0	0	0	Sil	FBgn0053864	His1:CG33864
MI1864	chr2	chr2	-	18013858	18014430	0	0	0	0	0	0	0	0	Sil	FBgn0053865	His2A:CG33865
MI1865	chr2	chr2	+	18014561	18015079	0	0	0	0	0	0	0	0	Sil	FBgn0053910	His2B:CG33910
MI1866	chr2	chr2	-	18015098	18016260	0	0	0	0	0	0	0	0	Sil	FBgn0053864	His1:CG33864
MI1867	chr2	chr2	-	18016892	18017970	0	0.04	0.04	0	0	0	0.085	0	Sil	FBgn0053866	His3:CG33866
MI1868	chr2	chr2	+	18019651	18020186	0	0	0	0	0	0	0	0	Sil	FBgn0053910	His2B:CG33910
MI1869	chr2	chr2	-	18020205	18021370	0.045	0.28	0.1	0.405	0.34	0	6.055	0.275	Fun	FBgn0053864	His1:CG33864
MI1870	chr2	chr2	-	18024079	18024650	0	0	0	0	0	0	0	0	Sil	FBgn0053865	His2A:CG33865
MI1871	chr2	chr2	+	18024808	18025514	0	0	0	0	0	0	0	0	Sil	FBgn0053910	His2B:CG33910
MI1872	chr2	chr2	-	18026647	18028200	0	0	0	0	0	0	0.035	0.235	Sil	FBgn0053866	His3:CG33866
MI1873	chr2	chr2	+	18028381	18028882	3.6	4.025	6.725	5.25	2.54	1.68	106.28	4.125	Fun	FBgn0053909	His4:CG33909
MI1874	chr2	chr2	+	18029911	18030420	0	0	0	0	0	0	0	0	Sil	FBgn0053910	His2B:CG33910
MI1875	chr2	chr2	-	18030439	18031610	0.44	0.235	0.58	1.375	0.425	0.64	18.475	0.13	Fun	FBgn0053864	His1:CG33864
MI1876	chr2	chr2	-	18032205	18033505	0	0	0	0	0	0	0	0	Sil	FBgn0053866	His3:CG33866
MI1877	chr2	chr2	-	18034340	18034879	0	0	0	0.345	0	0.31	0.245	0.105	Sil	FBgn0053865	His2A:CG33865
MI1878	chr2	chr2	+	18035031	18035540	0	0	0	0	0	0	0	0	Sil	FBgn0053910	His2B:CG33910
MI1879	chr2	chr2	-	18035559	18036730	0.175	0.45	0.72	0.915	0.605	0.42	22.81	0.47	Fun	FBgn0053864	His1:CG33864
MI1880	chr2	chr2	-	18036887	18038440	0	0	0	0	0	0.02	0.055	0.08	Sil	FBgn0053866	His3:CG33866
MI1881	chr2	chr2	+	18038621	18039122	0.11	0.055	0.175	0.05	0.505	0.06	54.535	0.28	Fun	FBgn0053909	His4:CG33909
MI1882	chr2	chr2	-	18039458	18039999	0	0	0	0	0	0	0	0	Sil	FBgn0053865	His2A:CG33865
MI1883	chr2	chr2	+	18040151	18040660	0	0	0	0	0	0	0	0	Sil	FBgn0053910	His2B:CG33910
MI1884	chr2	chr2	-	18040679	18041850	0.175	0.45	0.72	0.915	0.605	0.42	22.81	0.47	Fun	FBgn0053864	His1:CG33864
MI1885	chr2	chr2	-	18042007	18043560	0	0	0	0	0	0.02	0.055	0.08	Sil	FBgn0053866	His3:CG33866
MI1886	chr2	chr2	+	18043741	18044242	0.11	0.055	0.175	0.05	0.505	0.06	54.535	0.28	Fun	FBgn0053909	His4:CG33909
MI1887	chr2	chr2	-	18044567	18045120	0	0	0	0	0	0	0	0	Sil	FBgn0053865	His2A:CG33865
MI1888	chr2	chr2	+	18045271	18045780	0	0	0	0	0	0	0	0	Sil	FBgn0053910	His2B:CG33910
MI1889	chr2	chr2	-	18045799	18046970	0.175	0.45	0.72	0.915	0.605	0.42	22.81	0.47	Fun	FBgn0053864	His1:CG33864
MI1890	chr2	chr2	-	18047127	18048680	0	0	0	0	0	0.02	0.055	0.08	Sil	FBgn0053866	His3:CG33866
MI1891	chr2	chr2	-	18049687	18050240	0	0	0	0	0	0	0	0	Sil	FBgn0053865	His2A:CG33865
MI1892	chr2	chr2	+	18050391	18050900	0	0	0	0	0	0	0	0	Sil	FBgn0053910	His2B:CG33910
MI1893	chr2	chr2	-	18050919	18052090	0	0	0	0	0	0	0.225	0	Sil	FBgn0053864	His1:CG33864
MI1894	chr2	chr2	+	18053171	18057185	0.01	0	0.01	0.16	0.03	0.23	0	0.475	Sil
MI1895	chr2	chr2	+	18062404	18064597	0	0.02	0.055	0.23	0.035	0.735	0.11	1.125	Fun
MI1896	chr2	chr2	+	18071791	18080725	28.075	29.61	46.305	55	64.21	52.575	55.345	50.39	Fun	FBgn0263231	bel
MI1897	chr2	chr2	-	18081277	18084921	3.67	3.67	5.74	6.58	5.645	5.45	9.47	9.605	Fun	FBgn0037603	CG11753
MI1898	chr2	chr2	+	18083047	18085809	13.66	13.42	16.82	24.43	16.51	12.785	22.155	12.8	Fun	FBgn0000447	Dhod
MI1899	chr2	chr2	-	18085086	18086138	7.17	7.03	7.72	7.07	11.745	6.165	25.47	5.06	Fun	FBgn0037602	SLIRP2
MI1900	chr2	chr2	+	18086169	18090902	9.735	9.335	15.97	14.675	19.72	9.87	39.275	5.8	Fun	FBgn0024326	Mkk4
MI1901	chr2	chr2	+	18091491	18095102	0.23	0.15	0.395	0.59	0.64	0.305	0.19	0.125	Sil	FBgn0037601	Cyp313b1
MI1902	chr2	chr2	+	18105584	18107949	0	0	0	0.015	0.015	0.035	0	0	Sil-Dis	FBgn0026399	Or85e
MI1903	chr2	chr2	-	18115563	18146413	0.01	0	0.16	0.105	0.255	0.24	0	0.05	Sil	FBgn0261929	5-HT2B
MI1904	chr2	chr2	-	18168455	18173251	1.665	2.32	8.765	26.175	6.54	41.48	22.375	41.19	Fun	FBgn0266916	Cenp-C
MI1905	chr2	chr2	+	18173048	18174981	4.56	5.575	11.455	17.705	8.495	11.59	14.97	10.9	Fun	FBgn0037347	SecS
MI1906	chr2	chr2	-	18176608	18180683	1.395	2.495	4.645	22.17	4.275	16.225	12.57	11.49	Fun	FBgn0261004	asl
MI1907	chr2	chr2	-	18181819	18186839	14.6	13.595	38.765	39.915	30.6	18.35	44.445	9.765	Fun	FBgn0017550	Rga
MI1908	chr2	chr2	+	18185825	18189874	8.24	8.775	19.93	30.475	12.82	10.98	26.24	7.56	Fun	FBgn0019637	Atu
MI1909	chr2	chr2	-	18189622	18198655	10.58	10.465	36.425	35.555	16.62	12.47	61.195	26.63	Fun	FBgn0037350	Dph4
MI1910	chr2	chr2	+	18200464	18202069	2471.5	2351.95	3228.17	2608.82	2264.69	691.515	1808.82	181.94	Fun	FBgn0037351	RpL13A
MI1911	chr2	chr2	+	18202477	18203406	40.83	45.345	70.69	58.255	69.55	21.635	140.855	12.435	Fun	FBgn0051549	CG31549
MI1912	chr2	chr2	+	18204090	18205547	11.84	9.82	7.805	7.64	14.18	7.225	12.325	2.735	Fun	FBgn0037354	CG12171
MI1913	chr2	chr2	-	18205461	18206543	21.26	25.355	13.18	11.92	35.135	11.775	55.725	4.775	Fun	FBgn0051548	CG31548
MI1914	chr2	chr2	+	18206622	18212522	4.38	4.72	11.855	16.895	7.77	15.93	16.635	14.2	Fun	FBgn0046222	Wdr33
MI1915	chr2	chr2	-	18213604	18217481	5.03	4.38	16.085	17.43	17.66	25.725	20.69	19.335	Fun	FBgn0010772	Xe7
MI1916	chr2	chr2	+	18217993	18228008	7.57	6.495	9.01	13.435	15.145	10.355	19.28	4.73	Fun	FBgn0037363	Atg17
MI1917	chr2	chr2	-	18225990	18226876	0	0	0.155	2.53	0	2.525	0	1.76	Fun
MI1918	chr2	chr2	-	18228645	18235076	1.55	1.945	27.41	16.92	5.985	4.59	20.375	3.275	Fun	FBgn0037364	Rab23
MI1919	chr2	chr2	+	18235301	18262438	2.775	3.565	6.99	8.375	26.625	23.03	10.06	4.75	Fun	FBgn0261261	plx
MI1920	chr2	chr2	-	18239692	18241167	0	0	0	16.44	0	38.905	0	51.77	Dis	FBgn0037365	CG2104
MI1921	chr2	chr2	-	18262655	18268093	0.055	0.13	0.08	0.12	0.705	0.03	0.985	0	Sil	FBgn0004878	cas
MI1922	chr2	chr2	+	18283528	18284937	6.785	6.61	15.175	19.105	15.985	19.53	51.355	27.22	Fun	FBgn0037368	CG1239
MI1923	chr2	chr2	-	18284824	18286526	12.22	11.865	20.72	60.46	18.165	64.52	35.615	90.76	Fun	FBgn0037369	CG2100
MI1924	chr2	chr2	+	18285887	18288202	14.975	11.01	45.235	32.585	9.08	8.97	10.585	6.275	Fun	FBgn0037370	CG1236
MI1925	chr2	chr2	-	18287903	18291838	3.28	4.34	7.5	26.025	8.395	24.18	18.41	19.99	Fun	FBgn0037371	Sym
MI1926	chr2	chr2	+	18291922	18295885	6.795	8.16	15.695	18.715	12.615	11.31	15.725	7.49	Fun	FBgn0027497	Madm
MI1927	chr2	chr2	-	18294797	18297510	9.125	8.96	27.865	22.37	19.4	8.18	36.8	6.55	Fun	FBgn0037372	CG2091
MI1928	chr2	chr2	-	18298933	18323758	12.595	11.015	266.47	337.66	49.7	71.92	22	82.68	Fun	FBgn0266672	Sec8
MI1929	chr2	chr2	+	18303368	18305856	0	0	2.625	0.78	0	0	0	0	Fun
MI1930	chr2	chr2	+	18321881	18324034	28.03	27.41	16.12	14.885	63.45	32.56	95.635	9.91	Fun	FBgn0037374	jagn
MI1931	chr2	chr2	+	18324387	18330664	0.53	0.555	7.695	27.41	1.075	80.18	0	113.295	Fun	FBgn0037375	kat-60L1
MI1932	chr2	chr2	-	18330551	18332358	9.66	9.825	36.25	41.555	25.79	19.75	59.23	13.5	Fun	FBgn0037376	Hat1
MI1933	chr2	chr2	+	18332295	18336088	41.78	39.215	44.32	63.75	39.515	34.9	65.465	21.17	Fun	FBgn0028690	Rpn5
MI1934	chr2	chr2	-	18335983	18337067	23.02	21.025	31.765	65.145	33.3	90.59	65.045	122.745	Fun	FBgn0037378	PSMG1
MI1935	chr2	chr2	+	18337030	18338417	30.29	26.875	114.81	155.405	85.575	106.74	344.99	168.96	Fun	FBgn0038453	Arl6IP1
MI1936	chr2	chr2	-	18338308	18344192	2.945	3.105	7.565	9.025	6.05	4.765	9.19	2.99	Fun	FBgn0038454	CG10324
MI1937	chr2	chr2	+	18340246	18342985	41.025	49.495	97.585	134.24	140.31	70.15	222.505	88.475	Fun	FBgn0015019	CCT3
MI1938	chr2	chr2	+	18345014	18348416	1.72	1.875	5.6	4.72	4.325	3.13	5.305	1.265	Fun	FBgn0038452	CG14905
MI1939	chr2	chr2	-	18348136	18351291	23.33	16.93	21.805	17.175	18	7.27	1.45	1.09	Fun	FBgn0051217	modSP
MI1940	chr2	chr2	-	18351682	18435876	4.105	4.19	6.995	6.875	8.595	6.43	17.935	12.225	Fun	FBgn0003944	Ubx
MI1941	chr2	chr2	-	18454136	18454737	0	0.17	0	45.19	0	122.02	0	168.69	Fun	FBgn0063261	CG31275
MI1942	chr2	chr2	+	18489066	18491234	0	0.035	0	14.355	0	46.38	0	53.28	Fun	FBgn0015230	Glut3
MI1943	chr2	chr2	-	18515894	18539605	5.47	4.265	19.77	16.245	3.87	2.155	0.74	1.835	Fun	FBgn0000014	abd-A
MI1944	chr2	chr2	+	18560592	18562064	10.545	9.45	8.485	10.695	3.665	1.08	0.815	1.07	Dis
MI1945	chr2	chr2	+	18593604	18646943	0.01	0	0.02	0.03	0.01	0	0	0	Sil
MI1946	chr2	chr2	+	18647202	18647836	0	0	0	1.06	0	3.785	0	6.68	Fun
MI1947	chr2	chr2	-	18650314	18657217	2.625	2.82	3.93	5.775	2.205	8.065	0.15	6.175	Fun	FBgn0000015	Abd-B
MI1948	chr2	chr2	-	18703771	18707057	0	0	0	2.28	0	6.225	0	10.4	Dis	FBgn0015008	Actn3
MI1949	chr2	chr2	+	18704877	18705320	0	0	0	19.75	0	29.555	0	50.835	Fun	FBgn0038458	VhaM9.7-d
MI1950	chr2	chr2	-	18713432	18715362	0.295	0.26	0.95	1.31	1.15	1.325	0.77	0.895	Fun	FBgn0003444	smo
MI1951	chr2	chr2	+	18715641	18717581	0.525	0.155	1.46	2.55	4.05	4.65	2.265	3.165	Fun	FBgn0000119	arr
MI1952	chr2	chr2	-	18724252	18730020	13.255	9.355	12.82	6.74	26.695	10.11	23.365	3.115	Fun	FBgn0038460	CG18622
MI1953	chr2	chr2	+	18731605	18733547	3.48	1.965	15.535	13.74	3.685	0.795	7.03	0.125	Fun	FBgn0051274	CG31274
MI1954	chr2	chr2	-	18733930	18735939	18.795	18.645	45.48	62.34	42.815	60.445	101.51	96.7	Fun	FBgn0038462	EMC2A
MI1955	chr2	chr2	+	18735893	18738985	10.685	8.945	8.985	30.805	38.96	109.71	14.89	177.955	Fun	FBgn0038463	CG3534
MI1956	chr2	chr2	-	18738910	18742355	6.78	8.855	22.575	31.61	17.785	17.83	21.955	11.715	Fun	FBgn0266917	Sf3a1
MI1957	chr2	chr2	+	18743326	18748181	35.745	30.765	22.15	24.75	35.28	11.74	15.53	3.41	Fun	FBgn0038465	Irc
MI1958	chr2	chr2	+	18748564	18753355	10.325	8.865	1.06	0.475	14.13	5.31	0.065	0	Fun	FBgn0038466	CG8907
MI1959	chr2	chr2	-	18752980	18762977	27.925	26.535	20.22	19.465	66.465	19.135	70.92	5.35	Fun	FBgn0038467	AdSL
MI1960	chr2	chr2	+	18754639	18769862	45.655	29.625	4.53	2.085	11.135	2.94	0.035	0.215	Fun	FBgn0004577	Pxd
MI1961	chr2	chr2	+	18778087	18780004	0.52	0.64	0	0.025	0.345	0.76	0.06	0.15	Sil
MI1962	chr2	chr2	-	18782999	18789620	0.04	0.14	0.145	0.62	15.81	0.795	53.765	1.15	Fun	FBgn0038470	CG18213
MI1963	chr2	chr2	+	18791597	18793918	4.925	5.47	14.935	13.865	23.4	6.935	59.375	7.125	Fun	FBgn0038471	Trm7-32
MI1964	chr2	chr2	-	18792823	18795335	4.05	3.59	11.45	12.765	8.18	7.515	45.815	12.65	Fun	FBgn0038472	CG3995
MI1965	chr2	chr2	+	18795253	18800661	5.415	6.78	11.58	19.585	19.185	21.36	35.96	14.27	Fun	FBgn0266053	Patr-1
MI1966	chr2	chr2	+	18807373	18823831	3.99	4.07	9.04	5.475	8.41	4.925	1.965	2.26	Fun	FBgn0020493	Dad
MI1967	chr2	chr2	-	18823183	18825674	10.675	11.32	14.74	21.32	76.425	13.24	74.07	9.8	Fun	FBgn0038473	Ns1
MI1968	chr2	chr2	+	18825416	18826545	29.72	31.395	31.98	33.13	66.24	55.485	74.17	20.25	Fun	FBgn0038474	mRpS11
MI1969	chr2	chr2	-	18826521	18831135	3.885	4.08	7.745	6.875	10.58	4.685	12.92	2.565	Fun	FBgn0038475	Keap1
MI1970	chr2	chr2	+	18831425	18833690	17.685	16.935	23.695	28.955	22.675	17.595	37.595	17.49	Fun	FBgn0037842	CG6567
MI1971	chr2	chr2	-	18832320	18834669	0.7	0.89	2.585	2.085	2.67	1.87	0.73	1.08	Fun	FBgn0037841	CG4565
MI1972	chr2	chr2	-	18843039	18848761	46.93	32.605	208.49	131.995	38.43	27.83	14.63	86.55	Fun	FBgn0259740	CG42394
MI1973	chr2	chr2	-	18850863	18859188	0.465	0.365	17.665	6.18	0.765	0.875	0.045	0.44	Fun	FBgn0261053	Cad86C
MI1974	chr2	chr2	-	18875445	18877781	1.41	1.35	10.77	5.435	3.625	3.04	3.575	4.745	Fun	FBgn0037838	TTLL15
MI1975	chr2	chr2	-	18908955	18909872	13.815	18.93	10.145	6.045	23.065	15.885	5.71	1.79	Fun	FBgn0037835	CG14687
MI1976	chr2	chr2	-	18913167	18915846	3.195	4.505	8.485	12.575	17.78	5.775	68.815	4.27	Fun	FBgn0017577	Mcm5
MI1977	chr2	chr2	+	18916652	18918769	17.595	17.605	40.96	37.43	68.51	18.285	184.375	20.715	Fun	FBgn0037834	Art1
MI1978	chr2	chr2	+	18925874	18927886	10.93	9.985	20.33	17.79	46.46	23.395	148.705	42.85	Fun	FBgn0261380	mRpL37
MI1979	chr2	chr2	-	18937423	18940015	0.21	0.14	0.125	0.02	0.505	0.32	8.65	0.29	Fun	FBgn0037832	Desi
MI1980	chr2	chr2	+	18940962	18943233	431.99	558.5	4.575	18.795	275.335	291.16	68.28	423.03	Fun	FBgn0085692	CG41561
MI1981	chr2	chr2	-	18953648	18962017	2.935	2.77	0.75	0.175	6.1	4.77	0.365	0.315	Fun	FBgn0051103	CG31103
MI1982	chr2	chr2	+	18967889	18972479	6.18	5.885	10.965	8.68	7.9	5.79	80.12	41.125	Fun	FBgn0039291	CG13663
MI1983	chr2	chr2	-	18970332	18975866	7.735	5.93	3.035	3.135	3.215	4.73	0.08	19.39	Fun	FBgn0039290	CG13654
MI1984	chr2	chr2	+	18980115	18991321	2.995	2.6	14.565	9.1	3.235	2.26	3.76	1.325	Fun	FBgn0022800	Cad96Ca
MI1985	chr2	chr2	+	18994606	19028227	0.01	0.02	0.04	12.825	0.01	27.43	0	33.575	Fun	FBgn0083946	lobo
MI1986	chr2	chr2	-	19002287	19012754	0.805	0.685	3.18	3.3	0.285	0.175	0.11	0	Fun	FBgn0039286	dan
MI1987	chr2	chr2	-	19066153	19068332	0.305	0.295	8.295	4.67	0.34	0.475	0	0	Fun	FBgn0039283	danr
MI1988	chr2	chr2	+	19074100	19079742	0.47	0.525	0.45	39.045	0.46	50.785	1.14	74.975	Fun	FBgn0033309	Lnpk
MI1989	chr2	chr2	-	19080788	19093558	0.435	0.315	5.145	3.01	3.675	3.25	0.795	3.075	Dis	FBgn0039282	Bili
MI1990	chr2	chr2	-	19093604	19102127	13.96	15.57	27.275	36.92	45.86	24.015	197	31.325	Fun	FBgn0259152	Clbn
MI1991	chr2	chr2	+	19104451	19106247	9.655	10.105	20.17	21.205	75.885	17.165	135.1	31.415	Fun	FBgn0260229	Mocs2A
MI1992	chr2	chr2	-	19112211	19119337	9.02	12.035	26.525	41.095	59.94	24.53	798.435	134.215	Fun	FBgn0265047	FDY
MI1993	chr2	chr2	+	19119959	19127930	4.455	5.75	12.215	19.125	18.03	33.88	51.545	55.295	Dis	FBgn0051510	CG31510
MI1994	chr2	chr2	-	19130345	19143919	0	0	0	0	0	0	0	0	Sil	FBgn0039711	CG7824
MI1995	chr2	chr2	+	19162619	19178136	0.81	0.535	5.33	4.03	6.665	6.97	3.515	6.2	Fun	FBgn0039277	Nepl16
MI1996	chr2	chr2	+	19187665	19221395	0	0.01	0	4.22	0	7.525	0	24.465	Fun	FBgn0054027	CG34027
MI1997	chr2	chr2	-	19190021	19190897	0.16	0.195	1.68	2.25	0.15	1.17	1.105	14.775	Dis	FBgn0030048	CG12112
MI1998	chr2	chr2	-	19224259	19234904	9.05	8.44	25.795	19.17	23.75	15.315	75.345	20.7	Fun	FBgn0053096	CG33096
[truncated: 23,334 more rows]

## Sheet: b. D. pseudoobscura
Table S6b. Chromosomal location, gene expression level, and functionality of genes in Drosophila pseudoobscura
Gene	Scaffold	Chromosome	Strand	Start	End	LF_FPKM1	LM_FPKM	PF_FPKM	PM_FPKM	WF_FPKM	WM_FPKM	O_FPKM	Te_FPKM	Functionality2	Best homolog in Dmel3	Common gene name4
PS1	2	2	-	1175	7209	0.075	0.49	0.075	0.885	6.93	3.01	15.22	10.29	Fun	FBgn0038803	CG5191
PS2	2	2	+	4538	6578	21.825	17.41	5.72	7.38	2.89	6.29	1.1	7.85	Fun	FBgn0038804	CG10877
PS3	2	2	+	7100	9124	5.745	10.255	8.065	21.475	28.805	34.775	38.055	101.005	Fun	FBgn0040575	CG15922
PS4	2	2	-	7587	9407	4.86	8.525	13.5	13.74	35.185	7.6	74.735	13.75	Fun	FBgn0043457	CG5180
PS5	2	2	+	9496	13462	1.02	9.335	2.515	49.43	11.8	71.525	14.095	76.64	Fun	FBgn0036892	Lon
PS6	2	2	+	13600	18387	5.35	7.015	6.36	6.01	21.5	15.115	39.01	5.41	Fun	FBgn0067783	DPCoAC
PS7	2	2	+	18639	19429	23.835	32.62	30.98	38.64	116.91	22.2	227.415	32.375	Fun	FBgn0039233	CG7006
PS8	2	2	+	19492	23396	5.78	9.33	21.24	19.805	15.75	10.83	19.155	7.235	Dis	FBgn0039234	Nct
PS9	2	2	-	22354	24608	1.495	1.85	2.285	4.1	4.47	16.39	4.665	28.975	Fun	FBgn0051119	HDAC11
PS10	2	2	-	28407	29330	0	20.19	13.42	13.27	0.775	2.045	0	0	Fun	FBgn0265266	CG13639
PS11	2	2	-	30632	31179	0.36	1.15	79.215	100.205	0.095	0	0	0	Fun	FBgn0039237	CG13640
PS12	2	2	+	31714	33649	11.34	25.06	5.94	4.025	2.345	3.455	0.02	0.08	Fun
PS13	2	2	-	33117	34112	111.675	124.61	173.475	153.22	9.365	6.165	0.175	0.925	Fun
PS14	2	2	+	34233	35470	232.95	218.69	75	64.46	14.13	8.89	0.185	0.95	Fun	FBgn0013949	Elal
PS15	2	2	-	36135	39450	4.545	8.85	9.075	25.13	81.925	20.085	122.39	17.75	Fun	FBgn0015625	CycB3
PS16	2	2	-	40023	45105	4.525	6.615	5.64	9.405	6.485	25.53	6.425	29.39	Fun	FBgn0260935	Vps15
PS17	2	2	+	45154	49827	1.97	4.435	21.54	15.09	11.295	21.285	13.805	32.99	Fun	FBgn0037664	CG8420
PS18	2	2	+	50079	54201	0	0.085	17.445	10.35	0.18	0.685	0.035	0.08	Fun	FBgn0037665	St2
PS19	2	2	-	51119	56017	10.375	17.75	26.655	38.98	93.41	56.235	184.27	172.75	Fun	FBgn0016034	mael
PS20	2	2	+	51730	53579	2.69	4.915	7.225	10.065	17.195	5.24	9.39	5.995	Fun	FBgn0037667	CG16734
PS21	2	2	+	61243	62379	23.2	29.42	44.63	40.13	82.26	17.26	91.38	10.79	Fun	FBgn0037670	Ibf1
PS22	2	2	+	62412	64253	191.605	201.555	64.96	79.4	187.945	128.015	169.96	58.595	Fun	FBgn0037671	ATP6AP2
PS23	2	2	-	64089	66053	8.165	12.585	0.245	0.57	0.145	3.385	0.04	5.5	Fun	FBgn0037672	sage
PS24	2	2	-	66765	68831	28.01	38.065	24.1	26.4	56.37	19.935	52.67	10.85	Fun	FBgn0010803	TrpRS
PS25	2	2	+	68838	72967	6.035	8.42	12.36	14.415	18.215	11.195	18.615	9.33	Fun	FBgn0285911	Vps16A
PS26	2	2	-	73889	84671	14.9	20.34	33.55	30.885	43.63	13.455	47.28	7.895	Dis	FBgn0039831	CG12054
PS27	2	2	+	84204	88745	999.475	852.34	648.57	541.69	1484.46	2623.45	925.195	77.87	Fun	FBgn0039830	ATPsynC
PS28	2	2	+	89383	90536	5.585	7.205	9.295	11.195	55.94	6.135	41.035	2.48	Fun	FBgn0039829	CG15561
PS29	2	2	-	90419	91714	16.195	18.27	16.51	18.255	90.84	14.37	81.115	7.095	Fun	FBgn0039828	CG1542
PS30	2	2	+	91766	94175	3.005	6.87	5.195	16.955	19.35	16.1	22.025	21.74	Fun	FBgn0061476	Zwilch
PS31	2	2	+	94537	100608	0.19	0.275	4.81	5.01	17.055	47.24	0.13	0.125	Fun	FBgn0267435	chp
PS32	2	2	-	101227	108338	4.03	3.04	7.295	4.765	1.06	1.475	0.565	0.255	Fun	FBgn0039827	CG1544
PS33	2	2	+	109608	127781	26.04	22.005	5.275	3.15	6.045	6.07	0.255	0.22	Fun	FBgn0051004	mesh
PS34	2	2	+	135025	150042	0.305	1.705	0.89	4.075	2.375	17.46	0.065	14.3	Dis	FBgn0086704	stops
PS35	2	2	-	150694	179555	0.155	0.24	0.805	0.535	0.37	2.05	0	0.535	Fun	FBgn0013973	Gycbeta100B
PS36	2	2	+	185734	188293	1.555	1.87	7.29	4.925	0.64	1.16	0.235	0.03	Fun	FBgn0039821	CG15556
PS37	2	2	-	188719	190066	0.37	0.185	0.045	0.48	0.185	2.845	0.03	5.915	Fun	FBgn0039820	CG15554
PS38	2	2	-	197282	200274	4.52	4.53	0.51	0.585	5.94	0.765	1.01	0	Dis	FBgn0039818	CG11318
PS39	2	2	+	215141	217540	0.155	0.245	0.015	0	0.695	1.86	0	0.02	Fun	FBgn0039817	CG15553
PS40	2	2	+	219283	224875	0.655	0.885	6.705	5.635	1.04	4.59	0	0	Fun	FBgn0039816	CG11317
PS41	2	2	+	228176	231139	0.015	0.015	0.185	0.15	0	898.37	0	11.56	Fun	FBgn0033115	Spn42De
PS42	2	2	-	231128	233128	0.025	0	0	0	0	6.36	0	0.17	Fun
PS43	2	2	+	231523	233074	0	0	0.04	0	0	35.12	0	1.91	Fun	FBgn0033115	Spn42De
PS44	2	2	+	233249	234943	0	0	0	0	0.025	318.445	0	5.875	Fun	FBgn0033115	Spn42De
PS45	2	2	-	237450	241700	0.945	0.65	0.58	0.545	0.355	0.77	0.105	2.04	Fun	FBgn0024288	Sox100B
PS46	2	2	+	242231	243012	0	0	0	0.155	0	0	0	0	Sil	FBgn0053920	CG33920
PS47	2	2	-	255558	257187	0.365	0.88	6.185	8.535	0	0	0	0	NA	FBgn0001965	Sos
PS48	2	2	+	259076	265563	26.715	37.505	68.715	65.155	147.935	33.785	148.075	19.91	Fun	FBgn0002413	dco
PS49	2	2	+	269450	270655	68.34	57.255	40.085	37.52	100.27	87.95	190.2	38.285	Fun	FBgn0010808	Chchd3
PS50	2	2	-	270594	274407	13.245	19.255	0.405	0.375	38.63	67.43	25.47	6.46	Fun	FBgn0016123	Alp4
PS51	2	2	-	275663	284184	9.865	11.58	1.215	2.92	4.225	48.43	0.03	72.195	Fun	FBgn0010015	CanA1
PS52	2	2	-	312805	331590	0	0.025	0	0.01	0.01	0.03	0.005	0.15	Sil	FBgn0053920	CG33920
PS53	2	2	-	337526	339034	0	0	0	0.235	0	2.87	0	3.475	Fun	FBgn0051897	CG31897
PS54	2	2	+	343210	344104	0	3.13	0	21.41	0	140.015	0	509.875	Dis	FBgn0051007	CG31007
PS55	2	2	+	345261	346462	0	0	0	0	0	0	0	0	Sil
PS56	2	2	+	359662	368745	1.49	1.625	1.595	0.995	0.54	1.995	0	0.075	Fun	FBgn0004573	5-HT7
PS57	2	2	+	373012	374459	0	0.68	0	6.765	0	4.45	0	4.725	Fun	FBgn0062411	Ctr1C
PS58	2	2	-	375403	378367	0	1.465	0.03	6.595	0	68.41	0	103.96	Dis	FBgn0039812	CG15548
PS59	2	2	+	390931	391735	0	3.455	0	24.5	0	48.435	0	283.13	Fun	FBgn0261806	CG42752
PS60	2	2	+	402118	411151	1	3.55	0.78	5.95	0.01	29.66	0	201.39	Fun	FBgn0039810	CG15549
PS61	2	2	-	408963	429084	2	1.88	1.08	1.105	0.89	2.23	0	0.165	Fun	FBgn0020912	Ptx1
PS62	2	2	-	444883	451071	11.55	5.125	0.03	0.06	0	1.655	0	0.505	Fun	FBgn0015032	Cyp4c3
PS63	2	2	+	456206	462550	286.68	319.575	175.71	167.14	155.755	178.92	80.52	177.96	Fun	FBgn0000416	Sap-r
PS64	2	2	+	465508	470400	1.19	1.175	8.06	6.26	1.045	3.79	0.535	0.13	Fun	FBgn0039808	CG12071
PS65	2	2	+	471029	476220	2.15	2.065	3.25	1.9	0.955	4.245	0.005	0.185	Fun	FBgn0039806	CG15545
PS66	2	2	-	476228	480723	1.79	4.49	6.905	15.975	26.785	16.395	29.585	15.015	Fun	FBgn0052438	SMC5
PS67	2	2	-	482974	484645	18.39	9.2	20.095	24.525	5.175	42.565	0	0.03	Fun	FBgn0039805	Cpr100A
PS68	2	2	-	498884	512003	0.405	0.515	0.15	0.34	0.035	0.135	0	0.01	Sil	FBgn0003720	tll
PS69	2	2	-	512723	527940	0.405	0.555	6.44	6.09	1.27	0.62	0.01	0.09	Fun	FBgn0039804	CG15544
PS70	2	2	-	528672	554180	7.525	9.135	16.93	18.21	19.065	9.955	20.48	2.225	Fun	FBgn0027598	cindr
PS71	2	2	-	554420	555683	50.375	73.895	55.245	83.955	75.225	72.78	106.49	81.79	Fun	FBgn0039802	dj-1beta
PS72	2	2	+	555781	558114	0	0.185	0	1.355	0.05	2.97	0	4.555	Dis	FBgn0037082	CG5664
PS73	2	2	+	559009	579387	5.385	6.475	20.04	15.78	19.235	7.885	16.22	1.655	Fun	FBgn0011739	wts
PS74	2	2	-	580292	608436	3.04	6.845	27.045	21.46	10.755	3.93	8.785	1.725	Fun	FBgn0004606	zfh1
PS75	2	2	+	610138	616989	0	0	0	0	0	0	0	0	Sil
PS76	2	2	+	621161	621905	0	0	0	0.2	0	1.625	0	2.065	Dis
PS77	2	2	+	634212	634822	812.9	727.505	591.255	571.235	159.555	424.19	5.705	89.885	Fun	FBgn0039800	Npc2g
PS78	2	2	-	635759	636836	0	1.605	0	14.67	0	62.255	0	217.835	Fun	FBgn0039799	CG15543
PS79	2	2	+	648810	649326	0	0	0	0.475	0	2.22	0	8.65	Dis
PS80	2	2	-	652448	654240	0	3.83	0.055	22.19	0	95.03	0	187.13	Fun	FBgn0039797	eIF4H2
PS81	2	2	+	675947	677657	0.045	1.585	0.025	10.055	0.885	77.39	0.445	131.86	Fun	FBgn0051010	CG31010
PS82	2	2	+	685741	688755	0	2.04	0.01	11.265	0.18	92.21	0.08	158.275	Fun	FBgn0039796	CG12069
PS83	2	2	-	690409	693108	0.22	9.18	788.56	446.105	11.67	42.135	0.045	42.545	Fun	FBgn0039795	Spn100A
PS84	2	2	+	690429	692536	0	0.055	3.925	1.97	0.095	0.155	0	0.04	Fun
PS85	2	2	+	717995	719205	0	0.04	0	0.52	0	2.015	0	5.67	Fun
PS86	2	2	-	729962	730844	0	1.215	0	6.76	0.05	21.45	0	54.9	Dis	FBgn0085462	CG34433
PS87	2	2	+	731156	733311	13.655	7.495	0.045	8.02	40.855	9.46	0.75	12.52	Fun	FBgn0051013	CG31013
PS88	2	2	-	750360	759080	0	0.94	0	8.52	0.095	55.955	0.13	113.28	Fun	FBgn0051017	PH4alphaNE3
PS89	2	2	+	753716	757118	0	0	0	0.1	0.135	2.97	0.02	3.915	Fun	FBgn0051016	CG31016
PS90	2	2	+	761520	765083	0	3.255	0	16.96	0.085	112.33	0	169.945	Fun
PS91	2	2	-	780536	782259	0	1.925	0	10.56	0	13.695	0.055	29.885	Fun	FBgn0051013	CG31013
PS92	2	2	+	782920	783943	0	4.93	0	21.51	0.1	76.875	0.055	147.8	Fun	FBgn0031021	ND-18
PS93	2	2	-	793611	795647	0	0	0	0	0	21.695	0	0.605	Fun	FBgn0051016	CG31016
PS94	2	2	+	795777	799005	0	0.31	0.02	2.705	0	12.235	0.03	23.555	Fun	FBgn0051017	PH4alphaNE3
PS95	2	2	-	801239	804026	0	1.145	0	9.77	0.015	32.465	0.02	19.975	Fun	FBgn0051017	PH4alphaNE3
PS96	2	2	-	808401	812599	0.215	0.36	0.115	0.38	0.42	71.455	0.165	3.945	Fun	FBgn0051021	CG31021
PS97	2	2	+	812350	821187	45.9	55.415	60.1	56.705	118.765	31.855	162.135	11.585	Fun	FBgn0039790	CG2246
PS98	2	2	+	825946	828897	5.145	4.605	1.7	0.865	4.705	7.905	0.24	0.175	Fun	FBgn0039789	CG9717
PS99	2	2	+	831206	832036	326.38	125	2.265	1.295	15.765	52.965	0	0.365	Fun	FBgn0039719	CG15515
PS100	2	2	+	833201	837890	0.055	0.065	0.835	0.6	0.165	1.52	0	1.145	Fun	FBgn0051036	CG31036
PS101	2	2	-	837897	839326	2.065	3.79	8.225	3.9	1.635	10.83	0	0.06	Fun	FBgn0039722	Capa
PS102	2	2	-	839584	844823	0.01	0.02	0.005	0.025	16.54	54.13	0.05	0.17	Fun	FBgn0003861	trp
PS103	2	2	+	845429	858336	0.14	0.56	18.19	14.75	1.46	2.905	0.485	0	Fun	FBgn0039723	CG15522
PS104	2	2	-	847595	854345	10609.6	13005.6	2.585	2.36	1825.99	2166.28	0	0.365	Fun	FBgn0039777	Jon99Fii
PS105	2	2	-	855068	856195	47.15	40.75	0.125	0.295	3.52	5.16	0	0.245	Fun	FBgn0003358	Jon99Ci
PS106	2	2	-	858085	862582	5.545	6.925	8.3	9.565	8.15	10.47	9.67	6.96	Fun	FBgn0051040	Cog7
PS107	2	2	+	871645	872976	8.55	19.63	34.21	59.22	33.72	58.385	31.815	88.86	Fun	FBgn0260760	CG42558
PS108	2	2	-	872898	874795	11.615	15.59	12.83	16.82	23.725	14.345	17.59	14.305	Fun	FBgn0039726	eIF2Balpha
PS109	2	2	+	874765	887227	4.15	5.65	3.02	4.2	3.945	31.56	4.015	34.2	Fun	FBgn0039727	Vps13B
PS110	2	2	-	889113	905242	0.55	1.25	5.115	4.05	0.48	1.88	0.035	0.21	Fun	FBgn0004622	TkR99D
PS111	2	2	+	916661	923834	5.87	5.525	25.415	15.5	0.23	0.795	0.005	0.03	Fun	FBgn0039728	CG7896
PS112	2	2	-	923834	926064	18.86	27.55	39.485	38.69	61.97	13.33	50.86	12.345	Fun	FBgn0000032	Acph-1
PS113	2	2	+	927955	930176	2.685	6.76	4.63	32.775	19.4	28.945	24.25	32.535	Fun	FBgn0039731	Sas-6
PS114	2	2	-	929576	932537	8.665	9.495	12.885	11.885	39.535	11.345	35.14	8.9	Fun	FBgn0039732	CG15525
PS115	2	2	+	930414	936305	4.1	5.7	11.55	15.96	13.585	61.25	15.205	82.975	Fun	FBgn0039734	Tace
PS116	2	2	-	936198	938145	43.165	53.82	64.745	67.675	288.905	55.455	393.995	113.62	Fun	FBgn0039735	Nph
PS117	2	2	+	936359	937265	0.985	0.77	2.385	2.67	0.075	0	0.395	1.51	Dis
PS118	2	2	+	937699	942696	284.255	440.715	668.125	686.65	686.775	71.38	411.615	34.975	Fun	FBgn0016685	Nlp
PS119	2	2	-	938525	939769	1.875	0.88	0.385	0.2	1.74	3.31	0.095	0.37	Dis	FBgn0039736	CG7912
PS120	2	2	-	942651	946700	273.245	193.815	151.385	131.45	232.065	286.625	242.17	302.57	Fun	FBgn0039737	CG7920
PS121	2	2	-	946900	954080	3.09	5.22	8.575	15.5	11.19	20.505	7.89	12.575	Fun	FBgn0039738	Mgat2
PS122	2	2	+	953993	969815	2.93	4.815	13.205	12.865	18.2	11.265	18.05	9.715	Fun	FBgn0026597	Axn
PS123	2	2	-	969602	977656	12.21	18.5	22.92	38.52	38.54	116.94	40.205	397.155	Fun	FBgn0039740	ZIPIC
PS124	2	2	+	972647	977195	2.125	3.2	9.165	9.75	4.915	5.59	5.715	6.015	Fun	FBgn0003511	Sry-beta
PS125	2	2	+	977390	979468	7.595	10.485	19.415	19.83	23.8	8.095	33.105	4.585	Fun	FBgn0003512	Sry-delta
PS126	2	2	-	978757	979937	1825.05	2259.97	2402.06	2369.51	1832.02	517.5	1896.56	280.68	Dis	FBgn0002626	RpL32
PS127	2	2	+	979979	983056	3.02	3.285	3.76	5.48	16.42	11.385	14.165	18.98	Fun	FBgn0039741	CG7943
PS128	2	2	-	981742	984960	11.83	21.39	0.235	0.47	5.165	28.07	0.545	1.3	Fun	FBgn0039742	CG15528
PS129	2	2	+	986389	988602	14.52	27.43	45.52	59.855	63.945	47.715	60.71	52.58	Fun	FBgn0039743	Jasper
PS130	2	2	-	988313	992211	2.995	5.18	4.425	6.57	24.81	5.485	77.01	12.675	Fun	FBgn0003479	spn-A
PS131	2	2	+	990328	992289	10.72	14.31	16.88	28.53	55.535	37.115	54.375	80.965	Fun	FBgn0260468	CG7950
PS132	2	2	+	992407	1058486	13.135	13.67	28.515	29.59	25.36	15.91	18.175	17.31	Fun	FBgn0266411	sima
PS133	2	2	-	1005913	1006969	0	0	0	0.165	0	1.91	0	2.74	Dis
PS134	2	2	+	1063176	1076703	3.105	2.39	14.27	9.775	11.305	2.035	3.535	0.165	Fun	FBgn0039709	Cad99C
PS135	2	2	-	1075915	1076245	0	0.54	4.76	3.315	0	0	0	0.585	Dis
PS136	2	2	-	1076341	1079160	10.3	16.55	17.855	19.55	49.71	13.075	62.325	8.725	Fun	FBgn0039710	dgt1
PS137	2	2	-	1079445	1081396	0.205	0.915	0.165	1.72	24.245	1.975	24.735	1.515	Fun	FBgn0033921	tej
PS138	2	2	-	1082244	1084459	3.145	5.51	8.095	9.93	21.66	10.42	26.525	10.14	Fun	FBgn0039712	CG15514
PS139	2	2	+	1083948	1086589	3491.92	4114.19	3751.38	3442.79	3371.11	866.6	8449.35	980.115	Fun	FBgn0039713	RpS8
PS140	2	2	-	1084930	1086460	2.765	2.64	6.235	4.94	0.6	0.06	0.42	0.27	Dis
PS141	2	2	-	1086527	1091248	28.945	44.555	25.11	44.36	74.62	120.385	119.42	291.65	Fun	FBgn0039714	Zip99C
PS142	2	2	+	1090796	1096854	6.27	10.935	8.895	28.69	26.39	47.995	29.73	61.31	Fun	FBgn0083969	CG34133
PS143	2	2	+	1097968	1117899	13.665	15.705	23.42	22.995	12.415	34.995	6.285	11.645	Fun	FBgn0051038	CG31038
PS144	2	2	-	1123090	1125647	26.885	19.22	1.845	1.18	2.13	2.56	0.06	0.035	Fun	FBgn0039787	CG9702
PS145	2	2	-	1126570	1144824	48.945	67.47	265.96	314.905	39.24	105.355	13.67	13.175	Fun	FBgn0082582	tmod
PS146	2	2	+	1126726	1133157	0.33	0.405	4.11	3.685	0.115	0.23	0.015	0.015	Fun
PS147	2	2	+	1148559	1154007	0.39	0.65	6.4	5.235	0.615	2.76	0	0.03	Fun
PS148	2	2	+	1168428	1169664	0	0.56	0.165	1.6	0	3.575	0	4.375	Fun
PS149	2	2	+	1177111	1178730	0	0.35	12.41	13.155	0.185	0.44	0	0.105	Dis
PS150	2	2	+	1179354	1180132	0	0	7.61	6.44	0	0	0	0	Fun
PS151	2	2	+	1181815	1192202	10.985	10.905	37.56	38.315	11.25	36.645	4.025	5.12	Fun	FBgn0027654	jdp
PS152	2	2	-	1192135	1194518	0.105	0.025	1.35	0.525	0	6.425	0	0.29	Fun	FBgn0039784	CG9698
PS153	2	2	-	1194627	1197153	0.05	0.06	0	0	0	18.04	0	0.55	Fun	FBgn0039783	PH4alphaNE2
PS154	2	2	-	1197263	1202276	0.17	0.22	0	0	0	24.7	0	0.685	Fun	FBgn0039783	PH4alphaNE2
PS155	2	2	+	1202600	1204587	30.305	24.165	0.125	0	0.045	1.945	0.02	0.095	Dis	FBgn0051014	PH4alphaSG1
PS156	2	2	+	1204621	1207509	0.24	0.635	0.225	3.555	0	9.725	0	20.09	Fun	FBgn0051371	CG31371
PS157	2	2	+	1212296	1217860	8.16	6.695	0.765	0.5	0.145	0.38	0	0	Fun	FBgn0026190	PH4alphaMP
PS158	2	2	-	1215794	1217817	47.09	33.74	0.015	0	0.155	0	0	0.045	Fun	FBgn0039779	PH4alphaSG2
PS159	2	2	-	1218645	1234412	17.115	12.055	18.47	17.95	46.215	48.485	9.92	5.27	Fun	FBgn0039776	PH4alphaEFB
PS160	2	2	-	1235654	1240288	7.465	6.085	11.325	9.37	4.4	4.125	0.445	2.01	Fun	FBgn0039774	CDase
PS161	2	2	+	1241665	1244156	8.685	13.57	12.64	15.62	30.205	11.25	31.71	4.79	Fun	FBgn0039773	CG2224
PS162	2	2	+	1244771	1254006	32.025	24.465	8.455	8.03	47.79	18.64	59.805	3.36	Fun	FBgn0028646	aralar1
PS163	2	2	+	1254549	1255638	0	0	0	0	0	0	0.04	0	Sil	FBgn0039771	Osi23
PS164	2	2	+	1256061	1264437	0.87	0.6	1.77	1.565	0.615	1.895	0	0	Fun	FBgn0039770	CG15537
PS165	2	2	-	1264503	1266841	23.465	11.74	0	0.025	1.8	1.71	0.075	0.06	Fun	FBgn0039769	CG15534
PS166	2	2	-	1267370	1270352	19.225	11.045	0.24	0.35	1.365	3.045	0.465	1.82	Fun	FBgn0039768	CG15533
PS167	2	2	+	1271849	1274390	10.325	16.71	18.71	22.925	40.775	14.3	59.38	10.1	Fun	FBgn0039767	CG2218
PS168	2	2	+	1274747	1276379	1.335	2.07	2.355	4.575	21.76	4.37	29.935	3.625	Fun	FBgn0039766	CG15536
PS169	2	2	-	1276308	1276998	48.095	53.725	59.4	72.2	104.475	61.22	96.425	48.35	Fun	FBgn0039765	mRpS18C
PS170	2	2	+	1277263	1279910	5.565	6.305	8.99	7.375	21.685	5.6	15.005	1.95	Fun	FBgn0039764	CG15535
PS171	2	2	-	1300547	1302316	464.765	491.195	471.295	440.525	498.33	436.88	175.595	158.445	Fun	FBgn0015221	Fer2LCH
PS172	2	2	+	1301353	1305552	231.05	243.19	269.705	260.855	254.12	259.68	143.725	121.85	Fun	FBgn0015222	Fer1HCH
PS173	2	2	-	1307476	1309144	0.03	0.09	0	0.43	0	1.36	0	2.985	Fun
PS174	2	2	-	1321203	1406371	5.415	6.445	37.77	39.005	30.405	2.1	43.5	1.105	Fun	FBgn0010113	hdc
PS175	2	2	+	1429560	1440089	0.43	1.27	1.005	0.95	2.285	2.105	0.635	1.195	Fun	FBgn0039759	CG9733
PS176	2	2	-	1429927	1430983	931.23	1033.84	0.095	0.21	145.46	81.605	0	0	Fun	FBgn0039761	CG18404
PS177	2	2	+	1430033	1431045	3.07	4.25	0	0	0	0	0	0	Dis
PS178	2	2	-	1431190	1432616	344.305	346.47	0.085	0.115	0.39	0.32	0	0	Fun	FBgn0039760	CG9682
PS179	2	2	+	1431696	1432541	1.77	0.98	0	0	0	0	0	0	Dis
PS180	2	2	-	1434013	1434486	0	0	0	0.275	0	145.78	0	3.89	Dis
PS181	2	2	+	1440523	1442879	0.775	0.295	0.34	0.74	2.085	1.65	2.315	4.315	Fun	FBgn0039758	CG9737
PS182	2	2	-	1451225	1452516	0	0.04	0	0.33	0	2.86	0	4.555	Fun
PS183	2	2	-	1465854	1466304	0.435	4.735	105.92	181.305	0.925	1.33	0	2.98	Fun	FBgn0000279	CecC
PS184	2	2	+	1471150	1477287	2203.25	2762.64	2863.76	2681.36	2261.97	575.6	2440.66	232.385	Fun	FBgn0039757	RpS7
PS185	2	2	-	1471861	1472495	0	0	0.2	0.825	0.085	40.3	0	0.895	Fun	FBgn0000279	CecC
PS186	2	2	-	1472936	1474567	0.28	0.99	2.585	3.645	1.59	5.42	0.845	12.89	Fun	FBgn0000279	CecC
PS187	2	2	+	1481114	1486528	23.375	18.04	8.885	4.505	59.985	34	37.75	13.89	Fun	FBgn0039756	CG9743
PS188	2	2	+	1486665	1488242	26.955	39.36	22.96	19.33	51.175	67.225	0.475	1.1	Fun	FBgn0039755	CG15531
PS189	2	2	+	1491649	1497163	4.67	3.83	3.015	3.335	54.365	23.3	2.175	2.82	Fun	FBgn0039754	CG9747
PS190	2	2	-	1500339	1501212	17.435	28.76	45.255	42.385	63.48	25.18	207.46	47.18	Fun	FBgn0260860	Bet5
PS191	2	2	-	1501680	1504193	0	1.275	0	8.79	0.03	106.405	0.02	202.635	Dis	FBgn0039752	CG15530
PS192	2	2	-	1504535	1507910	1.615	2.64	4.25	11.37	12.845	9.94	15.6	11.11	Fun	FBgn0025808	Rad17
PS193	2	2	+	1506345	1508597	6.835	7.79	10.05	9.67	10.765	12.92	20.725	16.39	Fun	FBgn0039751	CG1983
PS194	2	2	+	1509906	1513087	5912.88	4016.96	466.155	211.865	1082.5	4741.1	23.495	4.715	Fun	FBgn0002773	Mlc2
PS195	2	2	-	1510003	1512586	10.815	10.625	2.56	1.125	0.265	1.06	0	0	Fun
PS196	2	2	+	1513360	1519741	4.8	5.89	23.685	20.905	1.875	7.775	0.005	0.07	Fun	FBgn0051028	CG31028
PS197	2	2	+	1523274	1530088	0.255	0.435	6.715	5.795	0.2	0.235	0.06	0.095	Fun	FBgn0039749	CG11498
PS198	2	2	-	1529665	1530870	0.6	0.33	3.14	2.315	0.83	2.695	0	0.08	Fun	FBgn0039748	CG15529
PS199	2	2	+	1533330	1548845	795.21	743.125	160.37	186.52	316.855	769.58	238.605	623.39	Fun	FBgn0051025	Ppi1
PS200	2	2	-	1555577	1557268	0	0	0.02	0.065	4.065	10.235	0	1.395	Fun	FBgn0039703	CG7829
PS201	2	2	+	1560235	1561366	0.155	1.88	0.9	15.485	0.08	38.435	0	38.95	NA	FBgn0261998	CG42816
PS202	2	2	+	1561967	1564245	33.065	23.935	10.815	8.345	24.66	3.025	31.585	0.24	Dis	FBgn0039073	CG4408
PS203	2	2	-	1565873	1567355	1490.88	1782.54	1801.93	1750.26	1588.73	439.42	1889.68	169.95	Fun	FBgn0002622	RpS3
PS204	2	2	+	1566002	1567265	3.63	3.945	8.85	6.98	0.43	0.19	0.47	0.38	Fun
PS205	2	2	+	1568528	1570660	1.48	1.18	0.04	0.54	0.055	1.19	0	1.6	Fun	FBgn0039609	Nepl17
PS206	2	2	+	1571130	1573238	21.975	14.87	10.355	7.215	1.64	1.125	0.08	0.795	Dis	FBgn0039611	Nepl18
PS207	2	2	+	1573674	1577081	9.31	12.195	20.285	19.49	13.945	9.185	15.99	2.915	Fun	FBgn0051357	Kaz
PS208	2	2	-	1580606	1585966	8.585	12.57	20.905	25.115	30.625	22.6	27.16	10.455	Fun	FBgn0039229	Saf-B
PS209	2	2	+	1586330	1588567	8.125	9.535	15.755	15.95	45.92	8.9	66.145	9.565	Fun	FBgn0027617	CG5808
PS210	2	2	-	1588523	1590302	2.925	4.245	2.585	6.265	10.4	31.355	22.775	189.56	Fun	FBgn0083986	CG34150
PS211	2	2	+	1589488	1598591	5.485	5.835	9.315	8.635	22.82	7.035	23.9	5.81	Fun	FBgn0027539	lili
PS212	2	2	-	1595659	1596711	0.11	11.42	2.1	46.245	0.05	86.475	0.05	104.47	Fun	FBgn0039228	CG6980
PS213	2	2	+	1599335	1605060	5.055	6.03	8.265	9.03	15.59	4.41	26.215	2.675	Fun	FBgn0039227	polybromo
PS214	2	2	+	1605541	1607308	52.185	36.04	0.47	0.495	9.455	19.505	6.5	2.695	Fun	FBgn0039226	Ude
PS215	2	2	-	1607364	1613513	0.025	0.045	0.015	0	0	0.14	0	0.055	Sil	FBgn0039225	Ets96B
PS216	2	2	+	1614274	1616734	0	0.035	0.555	0.705	0	0.095	0	0	Sil	FBgn0039224	CG13634
PS217	2	2	+	1618511	1621384	6.215	6.995	18.52	18.835	21.2	12.665	22.2	5.46	Fun	FBgn0039223	CG5805
PS218	2	2	-	1636089	1638246	16.21	18.585	6.28	6.935	35.015	55.175	17.06	2.98	Fun	FBgn0040600	CG13631
PS219	2	2	+	1643151	1648204	6.125	7.19	2.375	2.97	3.205	13.545	0	0.28	Fun	FBgn0015591	AstA
PS220	2	2	-	1647960	1655076	2.22	4.775	2.35	9.33	32.035	7.03	34.15	5.54	Fun	FBgn0000140	asp
PS221	2	2	-	1655501	1656526	1.23	3.345	0.325	1.035	0.28	2.785	0	2.11	Dis	FBgn0003719	tld
PS222	2	2	-	1660256	1688433	9.245	12.89	19.59	14.155	3.875	3.885	0.3	0.915	Fun	FBgn0004885	tok
PS223	2	2	+	1689339	1690839	29.085	41.47	49.405	66.845	42.985	84.025	32.52	124.565	Fun	FBgn0039219	CG13630
PS224	2	2	-	1690763	1691263	52.26	76.7	113.11	117.08	136.565	78.505	136.23	121.33	Fun	FBgn0039218	Rpb10
PS225	2	2	-	1691668	1696358	0.035	0.55	3.67	1.48	0.03	0.125	0	0.015	Fun	FBgn0039217	CG13627
PS226	2	2	-	1697265	1728060	2.71	3.75	3.31	1.11	5.46	19.86	0.15	0.575	Fun	FBgn0003429	slo
PS227	2	2	+	1750606	1752656	11.725	17.285	10.04	28.925	28.445	49.36	22.45	64.31	Fun	FBgn0020018	Ppox
PS228	2	2	-	1752164	1757180	4.535	6.14	6.7	8.95	21.91	14.865	22.61	15.21	Fun	FBgn0039215	CG6695
PS229	2	2	+	1757584	1760410	0.56	1.24	2.565	2.41	0.275	2.905	0.14	6.08	Fun	FBgn0051125	CG31125
PS230	2	2	-	1759672	1762960	16.825	20.49	27.455	28.555	16.22	15.15	12.56	7.165	Fun	FBgn0000139	ash2
PS231	2	2	+	1763540	1779777	2.125	4.135	6.535	11.105	7.965	24.77	7.935	55.54	Fun	FBgn0039214	puf
PS232	2	2	-	1779888	1789566	39.06	43.52	40.625	49.865	62.83	101.255	48.155	73.805	Fun	FBgn0039213	atl
PS233	2	2	+	1783545	1788227	5.585	7.23	8.385	7.885	2.085	3.6	1.26	4.535	Fun	FBgn0046685	Wsck
PS234	2	2	-	1789638	1792449	0.05	0.08	0.195	0.225	0.86	1.05	0.37	0.285	Fun	FBgn0043791	phu
PS235	2	2	+	1815930	1824474	0.315	0.165	0.7	0.39	0.64	2.995	0	0.025	Dis	FBgn0037698	CG16779
PS236	2	2	+	1824950	1827870	0.23	0.265	3.4	4.125	0.3	0.775	0	0.06	Fun
PS237	2	2	+	1829129	1835665	2.53	2.975	3.87	3.56	99.79	4.135	70.105	1.125	Fun	FBgn0039644	rdog
PS238	2	2	-	1841055	1862980	1.165	1.695	15.2	16.925	4.565	22.765	0.12	0.085	Fun	FBgn0039647	jus
PS239	2	2	-	1867612	1870975	1.765	1.66	1.795	1.6	2.615	1.79	1.08	0.835	Fun	FBgn0039650	Mesh1
PS240	2	2	+	1868076	1870087	35.375	93.165	134.96	103.67	143.385	22.215	105.05	8.88	Fun	FBgn0014427	CG11899
PS241	2	2	-	1871491	1872829	0.115	10.755	0.485	24.295	0.655	19.4	0.435	23.56	Dis	FBgn0039651	Cyt-c1L
PS242	2	2	-	1873845	1874798	0	0.135	1.695	2.675	0.045	0.385	0.05	0.055	Fun
PS243	2	2	-	1890759	1894039	3.445	6.67	9.805	11.805	21.59	5.22	22.225	4.2	Fun	FBgn0039654	Brd8
PS244	2	2	+	1893583	1894981	106.555	103.195	78.395	70.68	135.215	92.295	249.195	15.035	Fun	FBgn0062442	Cisd2
PS245	2	2	-	1894982	1896953	1431.59	1586.44	1257.14	1157.81	1320.95	256.83	1182.87	87.875	Fun	FBgn0029176	eEF1gamma
PS246	2	2	+	1895128	1896630	2.04	3.32	3.285	4.995	0.39	0.1	0.365	0.07	Fun
PS247	2	2	+	1897538	1904525	3.92	6.075	10.485	15.235	23.025	52.88	33.61	74.955	Fun	FBgn0028476	Usp1
PS248	2	2	-	1903240	1907943	0.01	0	0.01	0.04	0	7.635	0	4.06	Fun	FBgn0051445	CG31445
PS249	2	2	-	1908112	1914598	33.77	43.365	196.29	133.85	15.1	68.23	8.78	37.68	Fun	FBgn0263236	SP1029
PS250	2	2	-	1917231	1921308	5.4	6.445	94.47	74.77	37.21	0.16	61.45	0.105	Fun	FBgn0003525	stg
PS251	2	2	+	1922999	1944693	0	0	0.005	0	0	0	0	0	Sil
PS252	2	2	-	1995392	2000080	47.69	73.03	163.32	172.525	93.75	115.605	65.085	82.515	Fun	FBgn0015622	Cnx99A
PS253	2	2	-	2000970	2024868	0	0.01	0	0	0	0.02	0	0.075	Sil	FBgn0038733	CG11407
PS254	2	2	-	2030675	2033035	0	0	0.095	0.245	0	28.54	0	82.88	Fun
PS255	2	2	-	2033336	2033765	0	2.485	4.8	3.06	0	0	0	0.325	Fun	FBgn0085358	Diedel3
PS256	2	2	+	2062007	2176196	3.655	6.255	28.145	36.08	9.92	27.68	6.83	28.54	Dis	FBgn0004369	Ptp99A
PS257	2	2	-	2175962	2178335	0.685	0.81	2.085	1.73	4.885	1.375	6.255	0.675	Fun	FBgn0039663	CG2321
PS258	2	2	+	2178412	2179523	8.06	8.02	7.27	7.155	19.915	6.985	29.125	3.63	Fun	FBgn0039664	CG2006
PS259	2	2	-	2179393	2180080	103.92	121.45	138.26	149.725	165.905	175.705	254.395	171.045	Fun	FBgn0040623	Spase12
PS260	2	2	-	2180990	2182637	11.985	15.475	46.41	41.39	19.415	7.645	21.115	5.76	Fun	FBgn0039665	CG2310
PS261	2	2	+	2183337	2187666	15.145	12.52	1.88	1.605	15.76	45.16	0.145	0.605	Fun	FBgn0039667	FipoQ
PS262	2	2	-	2187528	2192353	8.54	12.66	11.46	20.805	26.62	84.72	32.365	105.265	Fun	FBgn0039668	Trc8
PS263	2	2	+	2206533	2207488	1.08	12.005	0.075	54.005	0.045	50.87	0.155	191.925	Fun	FBgn0039669	ND-20L
PS264	2	2	-	2227994	2240091	0	0.035	0.115	0.22	0.015	0	0.015	0	Sil
PS265	2	2	+	2252246	2262141	5.46	8.025	29.365	31.2	1.15	3.05	0	0.08	Fun	FBgn0000492	Dr
PS266	2	2	-	2274745	2276033	0	0.08	0	0.765	0	2.055	0	4.325	Fun
PS267	2	2	-	2285529	2286326	69.015	111.32	0.095	0.205	0.065	0	0	0	Fun	FBgn0039670	CG7567
PS268	2	2	-	2287367	2288193	98.085	144.575	0.145	0	0	0	0	0	Fun	FBgn0039671	CG11470
PS269	2	2	-	2288508	2289369	226.655	219.965	0.905	0.295	0.17	1.145	0.13	1.695	Fun	FBgn0051041	CG31041
PS270	2	2	+	2290363	2298385	37.485	44.73	74.33	77.225	106.415	43.91	94.86	24.605	Fun	FBgn0086361	alph
PS271	2	2	+	2318127	2320310	40.16	33.395	25.36	30.725	43.47	55.28	38.515	54.32	Fun	FBgn0039674	CG1907
PS272	2	2	-	2330441	2332788	0.375	0.385	1.25	1.48	0.335	1.605	0	0.225	Dis	FBgn0266137	Dop1R2
PS273	2	2	+	2339618	2342016	0	0.145	0	0.75	0.015	3.235	0	8.4	Fun
PS274	2	2	+	2353532	2362876	0.03	0.11	0.395	0.6	0.1	0.225	0.065	0.105	Sil	FBgn0039675	ppk21
PS275	2	2	-	2362952	2365051	0.055	0.105	0.17	0.03	0.29	0.73	0.02	0.575	Sil	FBgn0039676	ppk20
PS276	2	2	+	2365312	2367279	0.09	0.165	0.445	0.455	0.07	0.57	0.02	0.9	Sil	FBgn0039677	ppk30
PS277	2	2	-	2367352	2371894	20.33	28.85	32.485	42.43	55.805	17.205	86.26	17.1	Fun	FBgn0025457	Bub3
PS278	2	2	+	2367778	2368467	197.12	182.76	146.29	175.05	0.175	223.685	0.085	560.125	Fun	FBgn0039678	Obp99a
PS279	2	2	-	2372452	2374424	3.425	5.115	5.485	5.425	2.87	8.66	0.58	2.57	Fun	FBgn0039681	CG7582
PS280	2	2	+	2374951	2378746	1.785	2.115	3.595	3.26	2.205	9.765	0.03	0	Fun	FBgn0013972	Gycalpha99B
PS281	2	2	-	2378251	2379300	1151.68	1027.02	817.175	594.51	117.23	186.215	1.915	53.615	Fun	FBgn0039682	Obp99c
PS282	2	2	+	2385012	2390147	0.78	1.06	0.51	0.37	0.02	0.145	0	0	Fun	FBgn0039683	dmrt99B
PS283	2	2	+	2408007	2408945	15.025	31.7	52.78	35.11	0.045	0.15	0	0.25	Fun	FBgn0039684	Obp99d
PS284	2	2	-	2408450	2409075	13312.1	22898.3	13918.3	15017.1	3.545	59.875	0.165	5.455	Fun	FBgn0039685	Obp99b
PS285	2	2	+	2412671	2415799	0.145	0.515	0.305	0.7	0.955	3.28	0	0.335	Fun	FBgn0039686	CG15506
PS286	2	2	+	2415964	2417528	74.04	102.735	108.23	100.315	37.72	57.865	20.645	44.49	Fun	FBgn0024841	Pcd
PS287	2	2	-	2416903	2418278	8.01	9.885	7.105	10.135	35.02	4.085	128.005	14.78	Fun	FBgn0039687	Naa40
PS288	2	2	+	2418698	2421014	9.17	16.335	13.78	23.355	32.57	87.55	65.81	417.3	Fun	FBgn0039688	Kul
PS289	2	2	-	2419023	2419902	0.065	0.31	0.27	0.535	0	21.045	0	1.125	Dis	FBgn0037650	CG11977
PS290	2	2	-	2430755	2432746	6.515	8.98	5.21	11.265	35.3	20.585	37.74	18.125	Fun	FBgn0027583	CG7601
PS291	2	2	+	2432755	2436122	35.06	32.87	19.665	16.61	23.21	22.05	20.735	3.19	Fun	FBgn0039690	Gnpnat
PS292	2	2	-	2435850	2439091	2.505	4.01	5.785	6.77	15.085	6.41	17.055	5.6	Fun	FBgn0027518	Wdr24
PS293	2	2	+	2439086	2440655	7.805	10.965	13.375	14.705	19.68	5.61	19.405	4.035	Fun	FBgn0027784	Prp18
PS294	2	2	-	2440191	2441568	19.28	23.66	25.305	33.895	44.875	26	86.13	59.34	Fun	FBgn0015781	P5cr
PS295	2	2	+	2441579	2444526	8.315	10.63	12.52	13.97	26.24	11.45	61.765	13.81	Fun	FBgn0260779	GatA
PS296	2	2	-	2442638	2443365	130.675	119.33	76.575	92.695	214.075	349.35	141.665	60.57	Fun	FBgn0027785	NP15.6
PS297	2	2	-	2444508	2450664	2.385	1.535	4.79	3.225	0.5	2.18	0.175	0.725	Fun	FBgn0038674	CG14285
PS298	2	2	+	2460850	2464857	7.085	8.685	1.425	2.885	2.74	9.14	0	2.07	Fun	FBgn0028374	Hug
PS299	2	2	-	2487359	2493714	0.98	0.84	0.07	0.42	0.265	4.31	0.375	6.215	Fun	FBgn0038063	Octbeta2R
PS300	2	2	-	2554279	2554843	0	0	0	0	0	3.055	0	0	Dis
PS301	2	2	-	2559869	2563739	227.3	213.07	59.925	67.4	216.4	190.725	109.02	62.325	Fun	FBgn0005671	Vha55
PS302	2	2	+	2564991	2567140	32.835	46.995	67.125	64.1	93.825	91.45	67.97	152.93	Fun	FBgn0038065	Snx3
PS303	2	2	+	2567180	2569947	7.325	7.78	7.35	8.855	23.75	84.18	23.625	7.68	Fun	FBgn0260444	Not10
PS304	2	2	-	2568631	2569604	0	0	0	0	0	2.01	0	0.53	Fun
PS305	2	2	+	2573488	2576405	0.05	0.1	1.3	1.325	0.07	2.47	0.07	0.195	Dis	FBgn0038814	CG15923
PS306	2	2	-	2574627	2596853	4.645	6.915	21.335	20.105	20.895	7.5	21.795	9.24	Fun	FBgn0023097	bon
PS307	2	2	+	2596443	2599132	4.435	6.69	4.45	8.09	22.335	8.08	27.86	7.675	Fun	FBgn0038811	Pus1
PS308	2	2	-	2598667	2601025	31.37	37.385	30.965	37.63	57.055	27.57	62.29	24.77	Fun	FBgn0038810	Srp72
PS309	2	2	+	2601219	2603262	30.715	54.055	77.495	76.4	78.11	28.6	80.925	18.245	Fun	FBgn0014029	44441
PS310	2	2	+	2603340	2606892	18.65	25.275	29.085	28.975	84.92	27.78	95.805	20.675	Fun	FBgn0038809	CG16953
PS311	2	2	-	2608303	2609340	42.365	62.82	78.2	100.72	102.355	71.315	66.505	68.85	Fun	FBgn0038808	Srp14
PS312	2	2	-	2609864	2613088	3.365	4.555	5.06	6.62	14.17	3.855	26.705	4.765	Fun	FBgn0038806	CG5412
PS313	2	2	+	2609960	2611888	54.81	76.505	117.955	132.34	159.505	70.355	142.68	53.845	Fun	FBgn0023212	EloB
PS314	2	2	+	2612888	2614309	14.575	20.15	22.35	32.255	57.12	27.075	59.65	17.7	Dis	FBgn0038805	TFAM
PS315	2	2	-	2616470	2619561	1.425	2.25	7.775	9.41	36.485	18.945	49.245	35.46	Fun	FBgn0038803	CG5191
PS316	2	2	+	2649442	2652248	3.29	4.62	14.96	13.47	16.86	11.81	13.515	4.95	NA	FBgn0039234	Nct
PS317	2	2	-	2650785	2652272	1.575	2.295	8.725	5.95	8.815	1.095	4.65	0.295	Dis	FBgn0051119	HDAC11
PS318	2	2	-	2653747	2654311	0	0	0	0.15	0	119.265	0	342.065	Fun	FBgn0262010	CG42828
PS319	2	2	-	2655001	2655722	0	0	0	0	0	120.95	0	1244.01	Fun	FBgn0262009	CG42827
PS320	2	2	-	2656763	2657700	0	0	0	0	0.05	17.88	0.05	51.11	Fun	FBgn0262009	CG42827
PS321	2	2	+	2667899	2675331	0	1.24	0.115	10.965	0	17.04	0	25.02	Fun	FBgn0261998	CG42816
PS322	2	2	+	2675505	2676967	0	0	0.16	0.18	0	15.385	0	93.3	Fun	FBgn0262009	CG42827
PS323	2	2	+	2678000	2678466	0	0	0	0	0	197.465	0	705.485	Fun	FBgn0262009	CG42827
PS324	2	2	+	2678970	2679453	0	0	0	0	0	30.01	0	97.36	Dis	FBgn0262009	CG42827
PS325	2	2	+	2682206	2682648	0	0	0	0.23	0	65.1	0	41.615	Fun	FBgn0039077	CG17380
PS326	2	2	+	2682825	2683296	0	0	1.07	0	0	99.445	0	406.015	Fun	FBgn0262010	CG42828
PS327	2	2	-	2684920	2694976	0.64	0.675	15.555	12.55	0.715	1.715	0.165	0.53	Fun	FBgn0039075	CG4393
PS328	2	2	-	2698080	2706100	0	0	0	0	0	0.04	0	0.055	Sil	FBgn0051515	CG31515
PS329	2	2	+	2711674	2712746	0	0.125	0.47	0.32	0.045	113.6	0	191.715	Fun	FBgn0051296	CG31296
PS330	2	2	+	2712801	2717521	0	0	0.1	0.035	0	0.335	0	0.82	Sil	FBgn0259194	Ir94e
PS331	2	2	-	2718213	2721881	0.27	1.73	1.945	1.09	0.08	0.725	0	0.535	Dis	FBgn0039078	CG4374
PS332	2	2	-	2791493	2792450	0	0	0.065	0	0	59	0	1.66	Dis	FBgn0051265	CG31265
PS333	2	2	+	2797066	2803194	0	0	0.015	0	0	0.03	0	0.025	Sil	FBgn0039080	Ir94h
PS334	2	2	-	2822670	2823498	0	1.755	0	14.715	0	28.935	0	59.57	Fun	FBgn0085318	CG34289
PS335	2	2	-	2831685	2835238	36.775	29.665	3.105	6.45	9.13	42.995	0.055	51.4	Fun	FBgn0039081	Irk2
PS336	2	2	-	2839388	2844541	0.705	0.515	0.35	0.26	2.81	6.465	0.015	0.245	Fun	FBgn0039084	CG10175
PS337	2	2	-	2851238	2852954	2.995	3.385	0.25	0.495	1.105	1.115	0	0	Fun	FBgn0039087	Ugt303B2
PS338	2	2	-	2871412	2873627	0	2.215	0.015	11.785	0	106.86	0	147.085	Fun
PS339	2	2	+	2881868	2894998	0.335	0.365	7.505	5.545	0.48	2.81	0	0.025	Fun	FBgn0039089	beat-IV
PS340	2	2	-	2902474	2903681	1.135	1.59	0	0.19	1.745	2.505	0	0	Dis	FBgn0039092	CG16723
PS341	2	2	-	2904708	2905044	1.935	0.535	0	0	0	0.415	0	0	Dis	FBgn0053337	CG33337
PS342	2	2	-	2905593	2918184	15.85	13.855	0	0.055	15.355	20.61	0	0.11	Fun	FBgn0033792	CG13325
PS343	2	2	-	2922429	2925744	12.05	11.01	3.88	4.08	15.675	5.745	15.58	0.65	Fun	FBgn0039094	CG10184
PS344	2	2	-	2925931	2997755	8.16	8.1	9.345	5.975	20.53	51.38	3.14	1.82	Dis	FBgn0051145	CG31145
PS345	2	2	+	2973245	2974680	0	1.95	0	8.54	0	7.815	0	9.53	Dis	FBgn0000405	CycB
PS346	2	2	-	3005534	3006397	0.075	0.07	0.145	0.34	0	0.07	0	0.27	Sil	FBgn0035012	CG13590
PS347	2	2	+	3006899	3007880	11.255	8.02	11.65	12.06	40.3	10.595	38.175	16.36	Fun	FBgn0039098	GILT3
PS348	2	2	+	3008093	3009918	12.745	26.08	22.95	27.28	3.59	94.81	1.59	442.115	Fun	FBgn0039099	GILT2
PS349	2	2	+	3010104	3012362	67.915	81.53	77.965	78.42	180.39	41.62	144.41	16.55	Fun	FBgn0040227	eIF3d1
PS350	2	2	+	3012428	3013784	0.04	0.075	0	0	0.095	7.77	0.03	12.82	Fun	FBgn0039102	SPE
PS351	2	2	+	3013968	3015615	119.46	100.19	151.45	120.46	18.885	13.51	0.735	1.925	Fun	FBgn0039102	SPE
PS352	2	2	-	3015517	3021393	4.735	12.49	10.99	58.385	161.505	191.185	121.335	207.075	Fun	FBgn0027512	CG10254
PS353	2	2	-	3022628	3023727	0	35.17	0.04	161.685	0	964.315	0	2905.57	Fun	FBgn0039104	CG10252
PS354	2	2	+	3023243	3024724	0	2.275	0.05	15.145	0.03	16.67	0	20.35	Fun	FBgn0029094	asf1
PS355	2	2	-	3024330	3030629	0.27	1.105	0.34	3.64	1.755	24.67	0.72	101.42	Fun	FBgn0043005	prt
PS356	2	2	+	3028089	3031043	42.415	21.245	0.135	0.92	1.25	5.445	0	5.425	Fun	FBgn0051148	Gba1a
PS357	2	2	+	3031301	3038381	3.39	2.53	0.35	0.84	4.99	4.48	4.785	2.395	Fun	FBgn0039107	CG10300
PS358	2	2	-	3038245	3044934	0.575	0.745	0.545	0.58	0.56	2.455	0.04	1.25	Fun	FBgn0002922	nau
PS359	2	2	+	3050076	3058786	25.795	24.51	37.675	54.8	30.955	275.175	22.23	544.525	Fun	FBgn0039109	CG10365
PS360	2	2	-	3058782	3060600	95.91	165.635	79.135	111.505	155.38	90.41	172.94	85.44	Fun	FBgn0028691	Rpn9
PS361	2	2	+	3060237	3061855	8.84	19.145	14.07	27.485	24.91	28.455	32.975	41.1	Fun	FBgn0027526	Ublcp1
PS362	2	2	-	3061736	3066728	0.795	0.765	0.28	0.76	3.345	8.91	0.25	1.855	Fun	FBgn0039048	CG17111
PS363	2	2	+	3067738	3069151	0	0	0	0	0	0	0	0	Sil-Dis	FBgn0052675	Tango5
PS364	2	2	-	3071635	3111886	2.965	3.62	45.675	39.575	6.16	25.445	0	0.525	Fun	FBgn0039054	Cow
PS365	2	2	+	3094381	3096176	62.315	36.15	25.255	18.81	47.165	46.67	25.185	3.595	Fun	FBgn0039049	CG6726
PS366	2	2	+	3096356	3099646	10.915	7.05	1.125	0.655	7.605	7.715	5.395	0.095	Fun	FBgn0039049	CG6726
PS367	2	2	-	3113046	3117308	4.02	6.95	22.08	21.02	28.21	9.275	28.44	4.66	Fun	FBgn0039055	Rassf
PS368	2	2	+	3117984	3123690	5.04	5.855	10.575	9.485	32.58	6.69	34.33	3.15	Fun	FBgn0039056	CenB1A
PS369	2	2	-	3123218	3127727	1.815	4.44	5.88	14.915	17.13	19	28.885	26.575	Fun	FBgn0051365	CG31365
PS370	2	2	+	3127597	3131512	91.84	132.575	66.43	77.285	101.83	56.015	85.375	33.91	Fun	FBgn0028692	Rpn2
PS371	2	2	-	3130597	3131447	2.51	2.985	4.53	5.82	2.425	1.49	1.05	0.405	Fun
PS372	2	2	+	3132510	3136779	30.665	33.735	50.295	40.255	32.42	17.65	18.45	2.895	Fun	FBgn0037697	GstZ2
PS373	2	2	-	3138069	3167625	32.875	26.74	31.66	37.16	19.095	71.175	1.795	15.48	Fun	FBgn0261552	ps
PS374	2	2	-	3180634	3184798	10.89	18.145	27.7	51.285	15.295	55.825	23.935	65.775	Fun	FBgn0011740	alpha-Man-IIa
PS375	2	2	+	3184576	3189140	0.4	2.935	3.625	37.2	0.515	714.205	0.035	510.365	Fun	FBgn0003889	betaTub85D
PS376	2	2	-	3189261	3192609	7.145	8.93	17.2	15.87	20.375	10.555	18.825	7.925	Fun	FBgn0037689	CG8135
PS377	2	2	+	3192519	3195013	4.35	7.6	7.52	13.475	14.19	47.225	21.335	71.635	Fun	FBgn0037688	CG9356
PS378	2	2	-	3194034	3195018	27.605	22.74	15.855	13.27	40.315	22.905	26.77	3.25	Fun	FBgn0037687	CG8132
PS379	2	2	+	3195509	3196422	956.065	1125.87	847.935	816.02	1211.37	247.595	1085.61	98.65	Fun	FBgn0037686	RpL34b
PS380	2	2	+	3196478	3197714	14.165	13.495	10.15	12.79	48.285	77.86	43.255	34.115	Fun	FBgn0083953	CG34117
PS381	2	2	+	3201284	3202116	0	1.99	0.03	14.425	0.07	73.765	0.075	268.33	Fun	FBgn0033168	CG11145
PS382	2	2	+	3202659	3232511	11.635	15.955	23.015	21.655	6.635	16.825	0.4	2.04	Fun	FBgn0000723	FER
PS383	2	2	-	3232333	3234842	45.49	27.02	2.66	1.66	11.55	34.69	0.12	4.975	Fun	FBgn0037684	Srr
PS384	2	2	-	3235360	3258922	53.44	145.8	224.345	240.39	114.775	195.77	84.51	188.8	Fun	FBgn0263750	CG43675
PS385	2	2	-	3262903	3265177	9.615	17.655	61.565	58.28	28.34	13.335	24.2	9.36	Fun	FBgn0037680	pasi2
PS386	2	2	-	3266621	3268313	11.745	13.995	14.25	18.185	197.32	13.545	228.33	10.12	Fun	FBgn0038989	CG6937
PS387	2	2	+	3268396	3270385	4.005	5.655	12.88	16.535	13.715	3.225	25.395	4.89	Fun	FBgn0053107	CG33107
PS388	2	2	+	3270425	3271872	15.785	20.13	25.165	28.71	204.23	9.41	237.685	5.125	Fun	FBgn0024558	Dph5
PS389	2	2	-	3271853	3273574	14.94	21.69	28.885	35.97	48.565	44.285	94.575	99.355	Fun	FBgn0028837	CSN6
PS390	2	2	-	3274223	3289421	0.71	0.535	0.055	0.065	1.79	10.05	0.01	0.225	Fun	FBgn0053110	CG33110
PS391	2	2	+	3291969	3295980	5.505	3.63	0.9	1.44	7.95	1.735	0.43	0.26	Fun	FBgn0038986	sit
PS392	2	2	-	3298234	3301599	11.945	13.07	1.785	22.7	22.905	53.195	2.39	23.235	Fun	FBgn0260942	bond
PS393	2	2	+	3306490	3310848	34.995	42.05	78.01	96.07	92.985	129.68	84.805	202.465	Fun	FBgn0038984	AdipoR
PS394	2	2	+	3319931	3322201	1.035	0.67	1.085	1.99	40.7	10.84	1.06	0.125	Fun	FBgn0038983	CG5326
PS395	2	2	+	3322386	3323815	3.42	0.835	7.24	5.105	3.27	2.38	0	0.785	Fun	FBgn0053099	CG33099
PS396	2	2	+	3324180	3331768	18.545	20.94	21.875	21.105	15.365	20.22	1.835	5.015	Fun	FBgn0038981	CG5346
PS397	2	2	-	3361340	3362446	0.17	0.675	0.515	1.395	123.155	0.465	107.78	0.96	Fun	FBgn0036799	CG13380
PS398	2	2	+	3362967	3370807	7.02	9.45	9.05	14	14.805	31.53	11.435	33.465	Fun	FBgn0024273	WASp
PS399	2	2	-	3371924	3377435	1.57	2.7	4.57	5.915	10.58	3.66	13.855	2.75	Dis	FBgn0039602	CG1647
PS400	2	2	+	3376969	3379497	4.935	10.42	13.97	29.775	11.535	19.055	24.095	22.71	Fun	FBgn0039601	CG1523
PS401	2	2	-	3379394	3385226	19.85	30.4	70.04	72.44	39.935	25.97	37.925	16.225	Fun	FBgn0039600	CG1646
PS402	2	2	+	3386754	3390148	4.45	5.71	8.105	11.755	20.575	7.54	30.46	4.835	Fun	FBgn0005642	wdn
PS403	2	2	-	3390029	3390872	0	0	0.155	0	0.065	3.14	0	0.135	Fun	FBgn0261289	CheB98a
PS404	2	2	-	3402551	3404522	0	0	0	0	0	23.635	0	0.68	Fun	FBgn0039599	intr
PS405	2	2	+	3423660	3426878	0	0	0.01	0.015	0.01	104	0	3.54	Dis	FBgn0039598	aqrs
PS406	2	2	+	3431178	3433796	0.35	0.12	0.015	0	0.075	8.325	0	0.54	Fun	FBgn0039596	CG10000
PS407	2	2	+	3438548	3446972	1.61	1.675	0.035	0.055	0.645	2.09	0	0.25	Fun	FBgn0039595	AstA-R2
PS408	2	2	-	3449745	3490799	2.41	2.975	5.315	4.825	3.715	4.345	4.445	2.515	Fun	FBgn0027655	htt
PS409	2	2	-	3491342	3511755	2.86	3.045	4.355	5.42	16.815	21.58	0.505	2.31	Fun	FBgn0039594	snu
PS410	2	2	-	3522528	3523321	0	0	0	0	0.145	2.195	0	0.3	Dis	FBgn0261292	CheB53a
PS411	2	2	+	3525034	3527101	0	5.33	0	12.055	0	21.74	0	34.63	Dis	FBgn0011569	can
PS412	2	2	+	3546688	3547688	0	0.215	0.265	3.07	0	10.31	0	23.6	Fun
PS413	2	2	+	3554451	3556081	0	0	0.02	0.115	0	0	0	0	Sil	FBgn0039592	CG14062
PS414	2	2	+	3558431	3559871	0	0	0	0	0	0	0	0.03	Sil	FBgn0039592	CG14062
PS415	2	2	+	3560036	3561667	1.245	2.12	55.165	48.085	0.495	2.935	0	0.485	Fun	FBgn0039592	CG14062
PS416	2	2	-	3564656	3567564	1.095	2.845	0.02	0.085	0.095	0.25	0	0.015	Dis	FBgn0039591	CG9988
PS417	2	2	+	3569847	3607673	1.43	4.815	8.49	7.4	4.91	5.51	3.705	2.46	Dis	FBgn0039590	CG10011
PS418	2	2	-	3606239	3609579	2.62	4.08	3.445	5.585	16.97	4.345	12.985	3.745	Fun	FBgn0039589	CG9986
PS419	2	2	-	3609959	3616769	43.54	60.07	172.35	137.15	168.795	41.27	131.9	16.95	Fun	FBgn0001215	Hrb98DE
PS420	2	2	-	3618409	3619636	0	0.44	0	4.195	0	20.99	0	250.395	Fun	FBgn0038978	tHMG1
PS421	2	2	+	3619908	3622540	0	0.43	0	2.96	0	12.095	0.015	92.94	Fun
PS422	2	2	-	3620367	3629827	1.365	1.915	0.08	0.885	17.46	3.205	5.005	2.02	Fun	FBgn0013953	Esp
PS423	2	2	-	3630945	3634936	0.835	1.185	2.96	2.145	2.15	6.885	0	0.045	Fun	FBgn0039232	sosie
PS424	2	2	-	3636954	3639510	0.02	1.665	0	13.325	0	34.78	0	72.64	Fun	FBgn0050384	CG30384
PS425	2	2	-	3644497	3645884	86.57	107.555	90.835	95.545	100.105	57.765	102.23	36.325	Fun	FBgn0024509	Sec13
PS426	2	2	-	3646355	3647439	6.13	9.775	13.82	21.09	12.01	26.81	14.8	39.22	Fun
PS427	2	2	+	3647514	3648517	454.005	451.08	244.55	291.705	621.35	1203.18	213.27	103.79	Fun	FBgn0016119	ATPsynCF6
PS428	2	2	-	3648112	3658705	1.71	1.855	0.78	1.915	11.13	3.44	10.64	3.75	Fun	FBgn0264326	PolE1
PS429	2	2	-	3676623	3677200	0.775	0.86	1.29	1.9	0	1.75	0	0.31	Dis	FBgn0002941	slou
PS430	2	2	-	3688507	3689859	0.035	1.525	0	10.785	0	61.34	0	150.015	Fun	FBgn0030015	CG10761
PS431	2	2	-	3708423	3708848	3440.47	9774.42	1.2	2.33	0	0	0	0	Fun	FBgn0040565	CG7606
PS432	2	2	-	3710206	3710985	2631.19	5805.01	1.085	0.44	0	0.17	0	0.085	Fun	FBgn0038523	Sgs5bis
PS433	2	2	-	3727999	3729128	0.22	0.93	2.02	1.385	0.185	0.8	0	0	Dis	FBgn0264005	Hmx
PS434	2	2	+	3750546	3752288	49.585	55.395	50.325	64.875	95.575	55.685	105.33	37.425	Fun	FBgn0038519	Prx3
PS435	2	2	-	3752226	3757749	6.16	8.64	15.07	14.955	26.46	11.465	31.005	5.64	Fun	FBgn0025571	SF1
PS436	2	2	+	3757184	3760585	10.385	15.755	30.995	32.65	38.235	20.455	55.485	27.635	Fun	FBgn0040080	pins
PS437	2	2	-	3761155	3772345	3.42	2.065	0.01	0.025	0.345	0.89	0.04	0.37	Fun	FBgn0039527	CG5639
PS438	2	2	-	3774677	3783093	3.22	4.72	7.79	7.345	11.53	10.795	11.4	3.705	Fun	FBgn0039528	dsd
PS439	2	2	+	3783655	3816879	0.25	0.535	2.335	2.22	2.035	3.895	0.875	2.11	Fun	FBgn0039530	Tusp
PS440	2	2	-	3801853	3805236	16.035	11.99	9.97	5.36	28.28	47.63	13.795	3.965	Dis	FBgn0039529	CG5612
PS441	2	2	-	3816299	3818110	5.575	5.62	5.125	7.735	13.13	7.115	30.4	9.075	Fun	FBgn0039531	CG5611
PS442	2	2	+	3818489	3821706	9.48	17.61	33.955	44.95	31.955	93.6	62.78	171.835	Fun	FBgn0039532	Mtl
PS443	2	2	-	3822397	3829460	6.92	5.255	30.81	23.85	7.185	29.475	0.14	2.525	Fun	FBgn0266579	tau
PS444	2	2	-	3840298	3842998	6275.93	5031.23	354.145	166.5	1580.54	5614.46	46.545	26.21	Fun	FBgn0002772	Mlc1
PS445	2	2	+	3840301	3842888	11.665	8.615	1.22	0.17	0.41	0.68	0	0.07	Fun
PS446	2	2	-	3859581	3861107	9.39	14.525	20.545	25.36	44.625	16.23	39.935	10.135	Fun	FBgn0032321	YL-1
PS447	2	2	+	3861844	3865204	41.075	40.6	52.73	44.625	41.92	9.905	40.745	5.57	Fun	FBgn0039537	CG5590
PS448	2	2	-	3865034	3867088	9.13	14.6	20.055	26.765	32.535	16.3	34.02	10.425	Fun	FBgn0003330	Sce
PS449	2	2	-	3871907	3874586	0.02	5.3	0.025	71.215	0	132.13	0	154.04	Fun	FBgn0051055	CG31055
PS450	2	2	+	3872132	3879310	6.67	16.79	214.495	175.145	0.2	0.97	0.045	1.03	Fun	FBgn0046258	CG12880
PS451	2	2	+	3882469	3885956	40.09	63.12	51.05	71.86	49.25	40.12	37.92	33.64	Fun	FBgn0086346	ALiX
PS452	2	2	-	3885628	3887477	6.365	8.945	7.045	9.115	13.375	5.29	15.81	3.635	Fun	FBgn0263025	HSPBAP1
PS453	2	2	+	3887473	3890927	6.715	9.195	14.035	15.2	28.805	13.615	26.185	14.405	Fun	FBgn0045862	btz
PS454	2	2	-	3890460	3894356	19.345	17.345	14.15	13.35	13.085	6.02	31.9	8.045	Fun	FBgn0039543	CROT
PS455	2	2	+	3893228	3897952	2.5	5.17	5.31	20.23	15.41	52.205	21.01	58.475	Fun	FBgn0039544	CG12877
PS456	2	2	+	3916991	3920059	2.055	2.2	6.425	5.78	2.93	6.215	0.345	1.085	Fun	FBgn0005659	Ets98B
PS457	2	2	-	3951127	4092306	0.265	0.435	6.62	5.4	0.52	2.69	0	0.035	Fun	FBgn0085382	CG34353
PS458	2	2	+	3966986	3968785	0	3.38	0	29.375	0	105.48	0	300.695	Fun	FBgn0027498	CG2061
PS459	2	2	-	3972206	4021975	0	0	0.11	0	0	0	0	0.06	Sil	FBgn0085382	CG34353
PS460	2	2	+	4033156	4035653	0	0	0	0	0	0.035	0	0	Sil	FBgn0039551	Or98a
PS461	2	2	-	4058274	4059215	0	0	0	1.14	0	8.11	0	24.02	Fun	FBgn0039552	CG12426
PS462	2	2	+	4100228	4102055	0.05	70.525	0.065	809.36	0.045	1181.39	0.13	6358.97	Dis	FBgn0267366	mil
PS463	2	2	-	4102342	4105501	10.44	14.52	16.925	15.56	20.54	7.365	27.545	5.025	Fun	FBgn0039554	CG5003
PS464	2	2	+	4104747	4107104	5.775	7.69	8.92	9.275	21.445	9.325	16.885	13.905	Fun	FBgn0039555	mRpS22
PS465	2	2	-	4106968	4109058	3.725	5.95	13.63	13.605	16.825	7.125	21.845	7.77	Fun	FBgn0053213	CG33213
PS466	2	2	+	4108324	4109660	7.43	12.605	16.725	18.83	40.735	14.28	36.12	12.86	Fun	FBgn0001491	l(1)10Bb
PS467	2	2	-	4109099	4112196	84.185	95.545	87.785	86.32	113.48	64.26	121.775	22.75	Fun	FBgn0019925	Surf4
PS468	2	2	+	4111732	4116666	19.095	29.785	55.015	55.135	74.62	34.285	109.965	18.77	Fun	FBgn0261679	CG42726
PS469	2	2	-	4118199	4119918	4.02	8.125	6.565	15.12	11.77	18.225	13.335	29.775	Fun	FBgn0266722	Trs33
PS470	2	2	+	4119719	4122857	1.005	1.48	6.385	6.33	7.005	4.255	15.115	7.08	Fun	FBgn0038324	CG5038
PS471	2	2	-	4122392	4125826	4.085	6.765	11.01	10.89	31.475	6.41	26.35	4.455	Fun	FBgn0038325	Atg4b
PS472	2	2	+	4125713	4127960	15.125	14.23	11.98	11.97	35.42	15.08	24.86	6.275	Fun	FBgn0038326	CG5044
PS473	2	2	-	4127807	4130530	6.92	7.915	8.555	12.905	25.36	14.23	28.865	11.525	Fun	FBgn0026634	Cog2
PS474	2	2	+	4130402	4131551	15.36	24.81	33.45	44.8	53.455	34.605	64.6	56.955	Fun	FBgn0038327	Trax
PS475	2	2	-	4131037	4132700	2.285	4.305	4.145	11.92	12.57	17.94	31.005	25.745	Fun	FBgn0026737	CG6171
PS476	2	2	+	4133158	4155301	12.57	18.395	23.385	23.865	15.53	106.355	15.595	156.165	Fun	FBgn0020278	loco
PS477	2	2	-	4156594	4159900	9.935	10.265	13.105	13.64	23.76	14.435	15.705	4.975	Fun	FBgn0263863	mRpL45
PS478	2	2	-	4160641	4168469	0.6	5.195	1.7	48.35	5.42	412.155	6.575	390.34	Fun	FBgn0051161	CG31161
PS479	2	2	+	4161525	4162620	0	0.09	0.03	2.715	0.035	3.405	0	7.675	Dis
PS480	2	2	+	4168304	4173690	1.065	2.205	2.52	3.55	10.705	3.225	12.91	2.665	Fun	FBgn0051156	CG31156
PS481	2	2	-	4171085	4172381	0	4.065	0.1	23.67	0.065	96.325	0	147.985	Fun	FBgn0038993	CG13843
PS482	2	2	-	4172621	4179983	5.25	9.99	30.965	34.065	32.555	14.805	26.135	5.885	Fun	FBgn0051158	Efa6
PS483	2	2	+	4195309	4197808	2.65	4.08	7.55	9.295	18.38	7.505	16.885	5.135	Fun	FBgn0037679	Aduk
PS484	2	2	+	4197940	4199410	37.515	42.32	0.2	0.085	15.5	20.615	0.06	0.03	Fun	FBgn0037678	CG16749
PS485	2	2	+	4199672	4228929	0.305	0.665	4.275	3.48	1.505	8.44	0	0.63	Fun	FBgn0037676	CG8861
PS486	2	2	-	4248407	4252898	0	0	0	0	0.055	0.08	0.01	0	Sil	FBgn0039833	CG15564
PS487	2	2	-	4253752	4272745	3.795	2.8	3.26	3.53	11.5	10.18	11.51	1.38	Fun	FBgn0051005	qless
PS488	2	2	+	4273047	4273846	17.005	20.975	23.92	31.195	71.95	22.72	65.52	14.625	Fun	FBgn0039835	mRpL32
PS489	2	2	-	4273641	4275116	3.66	4.51	5.12	5.275	6.545	4.615	2.375	1.355	Fun	FBgn0039836	CG1750
PS490	2	2	+	4275474	4277629	6.595	11.78	14.82	36.16	21.735	37.55	32.575	56.315	Fun	FBgn0086362	spn-F
PS491	2	2	+	4278409	4280960	0	0	0.645	0.225	0.105	0.235	0	0	Sil	FBgn0039838	CAH6
PS492	2	2	+	4282096	4283522	0	0	151.135	93.465	0	0	0	0	Fun	FBgn0040629	CAH5
PS493	2	2	-	4282364	4282716	0	0	4.595	2.425	0	0	0	0	Dis
PS494	2	2	+	4284169	4302307	0	0	0	0	0	0.015	0	0	Sil	FBgn0039839	ppk24
PS495	2	2	-	4323943	4326787	5.37	5.705	0.03	0	0.68	1.58	0.02	0.08	Fun	FBgn0039840	pHCl-2
PS496	2	2	+	4333078	4393403	1.05	2.77	21.885	19.42	3.645	3.705	1.12	1.445	Fun	FBgn0085376	CG34347
PS497	2	2	+	4394852	4396885	0	6.36	0.165	30.785	0.205	107.525	0.06	222.85	Fun	FBgn0046332	gskt
PS498	2	2	-	4396796	4398160	0	0.075	0.055	0.47	0.09	2.435	0	5.81	Fun
PS499	2	2	+	4406277	4416845	21.565	38.855	36.67	38.25	3.575	9.105	0.11	0.095	Fun	FBgn0039844	CG1607
PS500	2	2	-	4416741	4418900	0	1.74	0.015	8.87	0.07	125.33	0.02	229.215	Fun	FBgn0051204	CG31204
PS501	2	2	+	4419341	4425413	1.845	2.51	5.235	5.295	11.765	5.895	12.685	5.17	Fun	FBgn0019990	Gcn2
PS502	2	2	-	4425246	4463330	10.315	11.445	5.175	10.92	22.26	54.735	34.965	130.57	Fun	FBgn0039846	PNPase
PS503	2	2	+	4429411	4507147	6.605	10.3	26.26	24.02	17.635	7.785	16.835	2.14	Fun	FBgn0261988	Gprk2
PS504	2	2	+	4454094	4464987	0.465	0.79	5.54	6.57	0.135	0.285	0.07	0.075	Fun
PS505	2	2	-	4508976	4511512	16.535	11.03	4.22	3.94	30.325	15.75	29.66	3.495	Fun	FBgn0039849	CG11334
PS506	2	2	+	4513166	4514106	0	3.775	0.135	28.58	0	134.44	0	398.19	Fun	FBgn0039850	CG11333
PS507	2	2	+	4531540	4532833	0	3.16	0	18.96	0	13.93	0	17.34	Fun	FBgn0034423	tbrd-2
PS508	2	2	-	4566045	4575387	0.63	3.42	108.765	59.73	0.03	0.36	0	0	Fun	FBgn0039851	mey
PS509	2	2	+	4614569	4641893	0.06	0.37	46.78	23.67	0	0.02	0	0.03	Fun	FBgn0039852	nyo
PS510	2	2	+	4649822	4653124	18.665	30	102.885	89.365	64.845	29.06	82.425	7.58	Fun	FBgn0039465	Tsp97E
PS511	2	2	-	4654590	4656949	0	0.235	0.12	2.885	0	4.18	0	7.145	Fun	FBgn0031443	Prosbeta4R2
PS512	2	2	+	4657402	4666370	22.475	17.9	18.81	16.985	27.96	50.82	1.12	8.635	Fun	FBgn0039464	CG6330
PS513	2	2	+	4666779	4668105	0	2.87	0	27.535	0	20.27	0	80.07	Fun
PS514	2	2	+	4668983	4671325	4.655	3.445	3.6	6.865	3.58	11.01	0.27	17.655	Fun	FBgn0031489	CG17224
PS515	2	2	-	4670874	4675667	1.115	4.615	3.445	23.535	10.505	24.75	13.115	30.59	Fun	FBgn0039463	Spag1
PS516	2	2	-	4676311	4707439	11.69	11.175	8.65	7.075	6.58	17.16	0.345	1.65	Fun	FBgn0285963	CG46339
PS517	2	2	+	4713140	4715304	3.245	5.66	8.715	8.145	19.93	3.95	24.575	3.965	Fun	FBgn0004510	Ets97D
PS518	2	2	-	4714959	4755662	2.65	3.605	10.23	9.85	18.855	6.225	31.135	5.065	Fun	FBgn0004359	T48
PS519	2	2	-	4759217	4763638	7.135	13.32	13.62	19.905	60.69	86.665	99.625	337.79	Fun	FBgn0039461	CG5500
PS520	2	2	+	4764097	4768493	2.805	3.975	10.04	9.645	9.19	5.085	10.085	2.225	Fun	FBgn0004903	Rb97D
PS521	2	2	+	4768581	4771484	407.14	353.24	128.175	95.28	67.37	36.05	5.345	2.65	Fun	FBgn0026562	SPARC
PS522	2	2	-	4771513	4773266	105.67	143.335	195.01	210.92	368.305	57.555	371.49	34.465	Fun	FBgn0001197	His2Av
PS523	2	2	-	4774052	4775301	0.43	7.68	0.585	11.195	0.425	15.51	0.425	32.7	Fun	FBgn0024807	DIP1
PS524	2	2	+	4775225	4777453	7.215	12.925	13.895	30.605	44.415	16.28	68.715	14.5	Fun	FBgn0027889	ball
PS525	2	2	-	4777216	4779431	3.29	3.925	4.245	4.105	9.42	2.88	22.08	3.025	Fun	FBgn0039459	IntS12
PS526	2	2	+	4778595	4801615	20.075	19.685	5.895	7.99	16.595	14.645	12.76	10.02	Fun	FBgn0051072	Lerp
PS527	2	2	-	4782729	4783647	0	5.235	0	9.235	0	11.905	0	27.695	Fun
PS528	2	2	-	4802292	4850253	6.105	8.02	36.385	26.08	44.65	4.565	55.085	1.145	Fun	FBgn0262473	Tl
PS529	2	2	-	4889146	4907748	0.065	3.55	0.145	13.03	0.035	14.64	0.04	19.515	Fun	FBgn0039710	dgt1
PS530	2	2	-	4917661	4918785	9.185	16.385	0.365	0.245	0.11	0.04	0	0	Fun	FBgn0039454	CG14247
PS531	2	2	+	4920178	4920842	148.9	87.045	0.185	0	0	0	0	0	Fun	FBgn0039453	CG6403
PS532	2	2	-	4926974	4929518	0.125	0	0.76	1.21	5.62	39.915	0	0.105	Fun	FBgn0040608	CG14246
PS533	2	2	-	4927641	4928118	134.36	72.035	20.96	12.07	5.325	29.29	0.4	0.55	Fun	FBgn0039452	CG14245
PS534	2	2	-	4930673	4931539	0.07	0.085	50.7	93.665	0.66	5.25	0	0.73	Fun	FBgn0040607	CG14244
PS535	2	2	+	4935370	4941901	6.715	10.6	13.805	22.74	28.955	25.21	32.81	24.875	Dis	FBgn0266465	GckIII
PS536	2	2	-	4941219	4973555	130.26	173.175	21.23	14.835	39.155	34.375	22.285	5.79	Fun	FBgn0014141	cher
PS537	2	2	-	4978285	4979294	21.405	14.19	0.845	0.94	1.16	0.505	0.225	0	Fun	FBgn0038479	CG17477
PS538	2	2	+	4979394	4981281	40.4	30.945	0.015	0	4.175	1.935	0	0.025	Dis	FBgn0051265	CG31265
PS539	2	2	-	4981231	4982211	134.545	88.735	0	0.08	32.875	20.42	0.04	0.09	Fun	FBgn0038481	CG17475
PS540	2	2	-	4982902	4983947	13.36	8.95	0	0	5.84	1.31	0	0	Dis	FBgn0038482	CG4053
PS541	2	2	+	4984371	4987878	90.755	59.075	0.11	0.03	12.975	6.04	0	0.045	Fun	FBgn0051266	CG31266
PS542	2	2	+	4988518	4989669	112.495	80.875	0.025	0	8.195	3.9	0	0.075	Fun	FBgn0038484	CG5246
PS543	2	2	+	4990189	4991221	2.51	4.145	0.2	0.39	0	0.61	0	0.72	Dis	FBgn0038485	CG5255
PS544	2	2	+	4991244	4992275	0	0.05	0	0.15	0	40.4	0	1.2	Dis	FBgn0038485	CG5255
PS545	2	2	-	4992293	4993564	0	0	0	0.11	0	0.14	0	0.075	Sil	FBgn0038487	TwdlW
PS546	2	2	-	4996025	4997307	0	2.305	0	12.78	0	18.895	0	43.305	Dis	FBgn0037788	CAH7
PS547	2	2	-	4999918	5006423	41.66	62.97	161.285	144.835	20.28	41.93	1.5	3.055	Fun	FBgn0037788	CAH7
PS548	2	2	+	5009894	5017886	15.735	22.87	54.55	52.36	69.66	29.165	46.69	16.845	Fun	FBgn0028734	Fmr1
PS549	2	2	-	5029559	5037693	0.615	0.445	0.3	0.96	1.135	3.27	0.46	0.21	Fun
PS550	2	2	-	5047614	5051630	0	0.035	0.15	0.135	0.03	0.145	0	0.015	Sil	FBgn0041105	nerfin-2
PS551	2	2	-	5053937	5056770	0	0	0	0	0	0	0	0	Sil	FBgn0053784	CG33784
PS552	2	2	-	5057422	5062460	0	0	0	0	0	0	0.025	0	Sil	FBgn0053630	CG33630
PS553	2	2	-	5063155	5064006	5.33	4.525	0	0	0	0.065	0	0.15	Fun	FBgn0037783	Npc2c
PS554	2	2	+	5069429	5070248	101.935	73.845	0	0	5.23	25.88	0	0	Fun	FBgn0037782	Npc2d
PS555	2	2	-	5071641	5073345	17.33	22.855	0.155	2.375	10.16	8.835	0	8.195	Fun	FBgn0051410	Npc2e
PS556	2	2	+	5071706	5075208	1.925	3.315	0.59	2.79	11.59	7.52	28.05	11.165	Fun	FBgn0037781	Fancl
PS557	2	2	-	5074957	5077453	7.725	12.85	21.13	31.09	13.695	49.54	20.505	80.61	Fun	FBgn0037780	ohgt
PS558	2	2	+	5077715	5079186	82.94	78.74	117.975	100.52	45.065	16.3	50.995	8.825	Fun	FBgn0037779	CG12811
PS559	2	2	-	5079145	5080958	3.05	3.53	3.4	2.95	10.79	2.7	9.155	0.65	Fun	FBgn0037778	mtTFB2
PS560	2	2	+	5080905	5081898	7.75	9.92	12.62	16.59	26.885	18.47	18.69	5.82	Fun	FBgn0037777	CG11722
PS561	2	2	-	5081857	5083302	28.625	39.895	55.885	57.33	61.34	21.405	103.32	30.005	Fun	FBgn0027524	CG3909
PS562	2	2	+	5085518	5136826	3.645	9.33	162.5	212.26	13.81	48.93	17.05	177.155	Fun	FBgn0053208	Mical
PS563	2	2	-	5115858	5116245	0	0	1.02	4.565	0	0	0	0.205	Dis
PS564	2	2	+	5137763	5139241	1.65	3.15	7.22	6.525	30.42	4.24	63.3	3.305	Fun	FBgn0037773	CG5359
PS565	2	2	+	5142051	5145323	0	0	0	0	0	0	0	0	Sil-Dis	FBgn0045473	Gr85a
PS566	2	2	-	5149604	5185316	7.07	18.015	38.9	31.795	14.77	27.265	3.06	2.01	Fun	FBgn0267336	Glut4EF
PS567	2	2	+	5160482	5164133	6.89	9.19	22.18	21.03	50.8	4.21	37.61	2.505	Fun	FBgn0037770	Art4
PS568	2	2	-	5281235	5285571	0.875	1.89	7.425	7.82	0.685	0.52	0.035	0.035	Fun
PS569	2	2	+	5287252	5297981	0.9	0.955	0.69	0.375	0.55	1.62	0.01	0.03	Fun
PS570	2	2	-	5287749	5289636	0.22	0.035	0.38	0.235	1.245	6.72	0	0	Fun	FBgn0038449	CG17562
PS571	2	2	-	5290101	5291981	2.88	2.36	0.055	0.235	1.305	1.9	0	0	Fun	FBgn0038451	CG14893
PS572	2	2	-	5292377	5294440	3.99	2.935	6.42	2.83	58.075	142.4	0.125	1.165	Fun	FBgn0038450	CG17560
PS573	2	2	-	5294555	5296590	28.295	43.24	30.6	26.775	14.26	4.28	0.16	0.075	Fun	FBgn0038449	CG17562
PS574	2	2	+	5299355	5302432	24.94	28.05	32.085	37.94	45.765	54.06	40.755	31.015	Fun	FBgn0022344	CG10340
PS575	2	2	-	5302421	5303821	2.045	3.245	0.755	0.44	2.065	6.26	0	0	Fun	FBgn0027109	NPF
PS576	2	2	+	5307978	5315251	1.395	0.575	0	0.06	4.115	20.27	0	0.295	Fun	FBgn0027562	CG10345
PS577	2	2	+	5326975	5335960	29.355	14.98	4.56	4.8	22.98	70.395	0.06	0.085	Fun	FBgn0020907	Scp2
PS578	2	2	+	5341231	5342265	2.245	2.215	3.175	4.05	13.685	4.82	21.79	3.545	Fun	FBgn0038446	CG14903
PS579	2	2	-	5341852	5404150	1.62	3.055	31.31	22.29	0.7	3.085	0.085	2.86	Dis	FBgn0259244	CG42342
PS580	2	2	+	5369196	5370034	0	0	0.04	0.935	0	2.62	0	12.88	Fun
PS581	2	2	+	5406287	5407541	48.285	44.63	0.18	0.07	7.81	9.825	0.04	0.165	Fun	FBgn0028381	Decay
PS582	2	2	+	5407668	5408991	0.125	0.035	0.055	0	0.12	0.035	0	0.035	Sil	FBgn0038440	Gr89a
PS583	2	2	+	5411296	5420513	0	0.055	5.38	1.71	0.015	1.145	0	1.525	Fun	FBgn0038439	Cad89D
PS584	2	2	-	5422048	5423149	1.365	1.75	0.64	1.155	1.67	1.56	0.235	0.145	Fun	FBgn0042206	GstD10
PS585	2	2	-	5423518	5424424	12.2	15.525	8.985	13.24	41.92	20.605	64.895	22.555	Fun	FBgn0038020	GstD9
PS586	2	2	-	5424579	5425792	555.195	590.28	505.46	430.56	762.53	387.01	631.735	370.12	Fun	FBgn0001149	GstD1
PS587	2	2	+	5427108	5429782	26.045	30.64	16.675	18.06	17.56	79.305	1.69	93.995	Fun	FBgn0010038	GstD2
PS588	2	2	+	5430749	5431522	44.655	64.405	42.44	29.19	0.85	0.975	0	0.695	Fun	FBgn0010040	GstD4
PS589	2	2	+	5432262	5433172	3.415	3.215	1.29	2.09	4.39	6.82	0.375	8.65	Fun	FBgn0010040	GstD4
PS590	2	2	+	5434515	5435491	12.69	23.11	1.24	1.445	32.615	2.79	85.365	3.985	Fun	FBgn0010044	GstD8
PS591	2	2	-	5436958	5437987	0	0	0.065	0.125	0.13	0.58	0	0.1	Sil	FBgn0038028	CG10035
PS592	2	2	-	5439353	5439968	0	0	0	1.475	0	1.96	0	2.845	Fun
PS593	2	2	+	5441597	5443368	0.095	0.06	0.04	0.455	5.05	29.3	0	4.96	Fun	FBgn0053098	CG33098
PS594	2	2	+	5444286	5458968	30.925	27.675	11.39	9.915	47.26	19.695	36.015	6.615	Fun	FBgn0038038	Sccpdh2
PS595	2	2	-	5444842	5447158	0.86	0.81	0.195	0.395	7.29	79.15	0.065	6.54	Fun	FBgn0038032	CG10096
PS596	2	2	-	5449963	5456311	59.695	69.25	7.15	6.96	15.865	27.85	5.14	7.03	Fun	FBgn0038037	Cyp9f2
PS597	2	2	-	5457240	5458658	0.115	0.61	0.045	1.805	0	7.56	0.03	16.3	Fun
PS598	2	2	+	5459090	5463396	10.61	20.69	28.245	36.445	18.07	98.325	33.585	237.195	Fun	FBgn0038039	CG5196
PS599	2	2	-	5463159	5464952	68.375	71.525	75.92	73.525	42.54	36.6	82.91	47.69	Fun	FBgn0000455	Dip-C
PS600	2	2	+	5465027	5473027	1.825	3.235	4.585	5.905	11.405	6.54	13.94	4.695	Fun	FBgn0082831	pps
PS601	2	2	-	5472709	5474206	2.035	2.24	11.135	9.575	1.92	6.145	0.19	1.635	Dis	FBgn0038042	Scgbeta
PS602	2	2	+	5474567	5475719	19.735	26.98	51.375	57.06	268.365	21.225	242.51	16.56	Fun	FBgn0038043	CG17202
PS603	2	2	-	5475664	5477960	131	170.63	333.675	340.135	161.11	119.235	170.89	56.93	Fun	FBgn0004103	Pp1-87B
PS604	2	2	+	5476337	5477199	0.35	0.44	1.1	2.72	0.165	0	0	0.135	Fun
PS605	2	2	+	5478153	5480360	3.715	5.12	13.235	14.685	8.68	14.27	12.55	34.155	Fun	FBgn0038045	NANS
PS606	2	2	-	5479961	5481741	26.315	43.185	81.905	91.005	58.48	33.24	51.35	25.57	Fun	FBgn0038046	CG5641
PS607	2	2	+	5481989	5483238	165.925	267.35	165.62	237.745	240.26	210.81	314.445	356.6	Fun	FBgn0086134	Prosalpha2
PS608	2	2	-	5483159	5484519	25.76	44.065	58.905	79.56	121.95	73.75	153.375	161.75	Fun	FBgn0029512	Aos1
PS609	2	2	+	5484345	5489166	791	470.99	91.035	93	342.175	368.235	268.48	200.345	Fun	FBgn0086687	Desat1
PS610	2	2	+	5500952	5506703	14.195	31.93	23.295	26.235	22.34	19.065	19.56	13.385	Fun	FBgn0038053	CG18549
PS611	2	2	-	5506985	5507998	2.375	17.035	2.71	64.695	3.005	71.485	3.11	115.72	Fun	FBgn0025637	SkpA
PS612	2	2	+	5510163	5512169	6.365	7.795	13.185	15.835	40.585	13.93	56.175	8.425	Fun	FBgn0038055	trus
PS613	2	2	-	5512187	5514021	15.71	16.405	22.455	21.395	35.97	13.69	36.82	7.905	Fun	FBgn0038056	CG5961
PS614	2	2	+	5514039	5516336	5.015	7.825	10.22	9.015	17.01	4.56	10.935	2.105	Fun	FBgn0038057	CG12267
PS615	2	2	-	5516202	5518974	4.915	7.85	9.655	8	16.06	7.115	16.075	2.46	Fun	FBgn0038058	CG5608
PS616	2	2	-	5519431	5522086	257.41	415.28	9.77	10.265	2.485	3.035	5.285	4.835	Fun	FBgn0013279	Hsp70Bc
PS617	2	2	+	5523323	5526260	399.73	605.805	15.61	17.77	3.09	4.595	7.875	9.135	Fun	FBgn0013279	Hsp70Bc
PS618	2	2	-	5523776	5525132	1.325	1.53	0	0.11	0	0.03	0	0.035	Dis
PS619	2	2	-	5525429	5530086	3.26	5.625	7.665	9.735	26.405	5.19	22.945	3.255	Dis	FBgn0278604	dmt
PS620	2	2	+	5529835	5534717	2.905	5.31	7.245	13.675	23.34	47.785	21.16	44.87	Fun	FBgn0037734	trbd
PS621	2	2	+	5535441	5545568	26.32	23.395	21.285	22.545	13.76	59.48	4.9	91.65	Fun	FBgn0051352	Unc-115a
PS622	2	2	-	5537647	5541709	0.01	0.085	0.07	0.16	0.13	2.005	0.01	0.395	Dis
PS623	2	2	-	5545470	5546770	4.305	8.92	13.79	16.19	21.19	15.485	29.6	9.9	Fun	FBgn0052939	CG32939
PS624	2	2	+	5545687	5550607	5.29	7.485	16.345	16.04	11.66	7.81	11.965	6.93	Fun	FBgn0038870	Oga
PS625	2	2	-	5550435	5551632	8.41	10.58	12.16	16.905	27.3	18.51	19.205	20.87	Fun	FBgn0038871	CG3337
PS626	2	2	+	5551459	5557564	2.14	3.91	7.705	8.095	16.16	8.635	15.69	6.73	Fun	FBgn0038872	Nelf-A
PS627	2	2	-	5558259	5566947	0.115	0.855	2.105	2.075	0.91	4.915	0	2.285	Fun	FBgn0000527	e
PS628	2	2	+	5570871	5573677	0.565	0.865	0	0.06	7.455	12.135	0	0.34	Fun	FBgn0038873	CG5892
PS629	2	2	+	5575342	5590417	1.59	1.675	0.34	0.565	0.185	0.875	0	0.58	Fun	FBgn0038874	ETHR
PS630	2	2	-	5591940	5595057	84.76	108.185	112.115	102.705	155.79	142.035	310.34	207.015	Fun	FBgn0285937	Rab1
PS631	2	2	-	5595150	5596082	29.805	47.32	86.34	90.64	79.545	43.66	477.68	380.885	Fun	FBgn0043012	AP-2sigma
PS632	2	2	+	5596111	5597088	15.27	21.095	12.65	21.105	37.77	35.065	73.37	43.45	Fun	FBgn0038876	Idi
PS633	2	2	-	5597088	5599624	28.075	33.615	31	26.775	63.955	50.88	93.005	18.14	Fun	FBgn0038877	CG3308
PS634	2	2	-	5599688	5604217	2.21	2.725	2.765	3.595	7.215	1.84	7.485	0.93	Fun	FBgn0038878	CG3301
PS635	2	2	+	5609177	5609797	0	0	2.775	1.68	0	0.945	0	0.94	Fun	FBgn0038879	CG17298
PS636	2	2	-	5611225	5620386	0	0.015	0	0	0.01	0.14	0	0.08	Sil	FBgn0038880	SIFaR
PS637	2	2	-	5643950	5676389	3.96	5.955	28.55	21.245	5.09	10.285	2.3	2.265	Dis	FBgn0038881	CG16791
PS638	2	2	-	5677660	5703430	34.55	46.95	107.57	97.9	163.725	39.525	242.525	20.195	Dis	FBgn0002781	mod(mdg4)
PS639	2	2	+	5678613	5680414	0	0.025	0.13	0.035	0.07	5.39	0.025	0.33	Fun
PS640	2	2	+	5686286	5689695	7.225	10.895	26.465	23.265	34.155	14.625	33.605	6.16	Fun	FBgn0261837	pre-mod(mdg4)-T
PS641	2	2	+	5692567	5697381	1.31	1.635	5.19	4.895	5.53	3.165	7.11	2.605	Fun	FBgn0261844	pre-mod(mdg4)-V
PS642	2	2	+	5707166	5709784	0.06	0	0.25	0	0	0	0	0	Sil	FBgn0004110	tin
PS643	2	2	+	5712640	5713469	0	0	0	0	0.13	3.695	0	0	Dis	FBgn0261294	CheB74a
PS644	2	2	+	5717632	5717974	0.275	0	1.105	2.79	0.425	1.85	0	0	Dis	FBgn0004862	bap
PS645	2	2	-	5729190	5730078	0	0	0	0	0	3.93	0	0	Dis	FBgn0261293	CheB53b
PS646	2	2	+	5731186	5736096	0.625	0.33	0	0	0.285	0.555	0.04	0.205	Sil	FBgn0038076	Cyp313a4
PS647	2	2	+	5738090	5740947	11.825	17.24	24.39	28.135	45.3	23.5	44.875	14.115	Fun	FBgn0026207	mbo
PS648	2	2	-	5740823	5742294	44.215	38.29	2.14	5.905	19.08	19.34	0.14	2.025	Fun	FBgn0038074	Gnmt
PS649	2	2	-	5742789	5749095	0.205	0.215	5.26	1.995	0.26	0.035	0	0.01	Fun	FBgn0038073	CG14395
PS650	2	2	-	5756065	5762835	3.195	2.13	0.435	0.075	2.94	11.56	0.155	2.155	Fun	FBgn0038072	CG6225
PS651	2	2	-	5764412	5769485	9.58	22.285	91.965	73.54	0.665	1.185	0.165	0.695	Dis	FBgn0038071	Dtg
PS652	2	2	+	5775992	5776705	0.5	0	0.315	0.665	0.19	2.235	0	4.68	Dis	FBgn0038070	CG6753
PS653	2	2	-	5778399	5779820	0	0	0.075	0.105	0	357.48	0.035	8.31	Dis	FBgn0042207	CG18530
PS654	2	2	+	5781202	5784661	1.51	2.98	16.405	15.98	14.25	4.605	19.61	2.405	Fun	FBgn0038815	CG5466
PS655	2	2	+	5785242	5792955	2.735	5.245	17.185	16.97	19.13	5.65	25.02	4.11	Fun	FBgn0001169	H
PS656	2	2	-	5792177	5798022	4.28	6.72	13.91	15.065	25.54	9.13	21.44	4.865	Fun	FBgn0015279	Pi3K92E
PS657	2	2	+	5799221	5808291	2.235	4.1	7.97	7.075	3.16	4.35	2.235	2.28	Fun	FBgn0038816	Lrrk
PS658	2	2	-	5808240	5815686	2.49	1.835	0.885	0.92	0.515	2.03	0.255	1.345	Fun	FBgn0028422	GluRIID
PS659	2	2	-	5815904	5823241	0.81	4.85	4.11	17.965	0.99	32.615	0	55.11	Dis	FBgn0038818	Nep4
PS660	2	2	+	5832817	5835754	12.46	5.96	3.21	1.835	25.63	136.515	0	5.395	Fun	FBgn0038819	Cpr92F
PS661	2	2	-	5839977	5841173	0	0	12.085	7.415	130.995	433.9	0	1.81	Fun	FBgn0038820	CG4000
PS662	2	2	-	5851657	5853361	0.23	0.34	1.265	0.76	0.77	1.99	2.975	0.05	Dis	FBgn0024944	Oamb
PS663	2	2	-	5853939	5878017	0.145	0.125	0.32	0.17	2.88	2.445	7.075	0.28	Dis	FBgn0024944	Oamb
PS664	2	2	+	5899179	5901475	0.26	0.96	8.28	4.39	0.035	0.135	0.425	0.11	Fun	FBgn0051205	CG31205
PS665	2	2	+	5902837	5913217	11.465	20.005	34.94	46.505	59.8	9.66	78.915	9.94	Fun	FBgn0004107	Cdk2
PS666	2	2	-	5909553	5911887	0	0.025	2.86	2.35	22.87	60.13	0.135	1.755	Fun	FBgn0051199	CG31199
PS667	2	2	+	5915704	5921917	0.675	0.705	3.365	3.08	2.4	10.68	0.115	0.12	Dis	FBgn0259222	CG42322
PS668	2	2	+	5921998	5972959	98.25	178.56	426.155	450.025	17.57	626.84	7.89	868.465	Dis	FBgn0038826	Syp
PS669	2	2	-	5922551	5928031	10.82	14.74	50.06	41.92	20.35	6.97	21.295	5.725	Fun	FBgn0051195	CG31195
PS670	2	2	-	5937426	5939510	3.15	4.055	3.31	2.24	0.79	1.365	0	0	Fun	FBgn0046689	Takl1
PS671	2	2	-	5951020	5958895	0.5	1.025	3.755	3.925	0	0	0	0.905	Dis
PS672	2	2	+	5975423	5979302	31.46	62.46	241.775	222.01	11.16	42.025	1.455	7.155	Fun
PS673	2	2	-	5977815	5983229	1.895	2.645	3.025	3.895	8.805	2.535	7.3	1.605	Fun	FBgn0038827	Fancd2
PS674	2	2	-	5983554	5985660	1.995	3.035	26.15	27.705	5.645	5.2	6.695	1.42	Fun	FBgn0038828	CG17270
PS675	2	2	-	5985843	5988755	63.58	55.325	60.395	60.96	55.865	54.575	36.45	44.555	Fun	FBgn0038829	CG17271
PS676	2	2	+	5988996	5996683	22.83	17.345	11.995	13.915	24.915	26.135	16.4	23.445	Fun	FBgn0039044	p53
PS677	2	2	+	5997090	5998928	0	0	0	0	0	0	0	0	Sil
PS678	2	2	-	5998937	6000309	0.075	0.115	0.045	0.395	0.03	0	0	0.035	Sil	FBgn0041225	Gr94a
PS679	2	2	+	6004052	6007986	10.65	13.3	31.06	35.28	7.78	11.85	7.62	10.43	Fun	FBgn0039043	CG17121
PS680	2	2	-	6010045	6010770	0	1.455	0.215	4.97	0	86.715	0.085	951.425	Fun	FBgn0039041	CG13838
PS681	2	2	+	6017271	6018752	0.165	0.255	0.235	0.25	3.59	26.735	0	1.65	Fun	FBgn0039040	CG13833
PS682	2	2	+	6025666	6031738	0.12	0.04	3.41	2.16	0.05	0.045	0	0.02	Fun	FBgn0039039	lmd
PS683	2	2	-	6038264	6041041	1.07	0.63	1.35	1.48	0.675	4.06	0.02	1.95	Fun	FBgn0039038	CG6688
PS684	2	2	+	6042743	6055993	0.98	0.975	2.4	1.735	2.205	2.4	1.81	1.605	Fun	FBgn0085404	CG34375
PS685	2	2	+	6058775	6077732	6.475	4.465	0.82	0.95	3.15	5.225	0.395	1.095	Fun	FBgn0263390	Nha2
PS686	2	2	-	6069969	6071343	0	0	0	0.055	0	0	0.035	0	Sil	FBgn0039033	Or94a
PS687	2	2	-	6104548	6113201	1.325	1.735	16.935	14	1.455	5.8	0.045	0.255	Fun	FBgn0017590	klg
PS688	2	2	+	6138042	6139820	0	0.755	0	5.435	0	27.655	0	61.59	Fun	FBgn0039029	CG4704
PS689	2	2	+	6176801	6178321	0.035	0.04	3.635	4.5	0.055	0.14	0	0	Fun	FBgn0039028	CG13840
PS690	2	2	-	6191106	6193372	0.315	0.195	6.845	5.16	0.02	0	0	0	Fun	FBgn0039027	CG7031
PS691	2	2	+	6209885	6210768	0	0.19	0.12	10.25	0.05	105.855	0	276.01	Fun
PS692	2	2	-	6212660	6225706	12.935	17.885	35.99	36.855	38.88	35.97	43.965	18.74	Fun	FBgn0039026	CG7029
PS693	2	2	+	6239646	6240627	0.23	0	0.115	0.22	12.065	38.275	0	0.2	Dis
PS694	2	2	+	6240728	6242403	0.035	0	0.06	0.07	0.54	1.88	0	0	Fun	FBgn0040588	CG13841
PS695	2	2	+	6242873	6247804	11.065	12.05	13.075	13.805	2.065	2.745	0.095	0.4	Fun	FBgn0039023	Nepl14
PS696	2	2	+	6248689	6251595	2.66	2.235	0.88	0.575	0.705	0.64	0.05	0.015	Fun	FBgn0039022	Nepl13
PS697	2	2	+	6258275	6262514	2.19	4.62	8.675	13.235	10.935	58.11	17.25	119.69	Fun	FBgn0086253	rumi
PS698	2	2	-	6262291	6263351	25.14	39.665	69.585	60.98	36.605	15.93	40.35	8.235	Fun	FBgn0039019	HP1c
PS699	2	2	+	6266057	6268695	5	6.53	6.29	8.54	33.865	2.475	31.135	1.33	Fun	FBgn0263143	vret
PS700	2	2	+	6272198	6279745	4.245	4.415	5.82	4.925	19.34	3.59	21.815	1.975	Fun	FBgn0039016	Dcr-1
PS701	2	2	+	6281312	6281767	1.13	2.52	0.605	0.635	1.125	2.355	0.125	0.435	Dis	FBgn0026323	Tak1
PS702	2	2	-	6281591	6286396	11.92	17.625	43.08	39.505	23.205	25.51	18.545	4.835	Fun	FBgn0266409	CG45049
PS703	2	2	+	6286707	6288246	2.845	4.805	6.67	8.07	12.8	4.85	19.975	4.05	Fun	FBgn0039013	CG4813
PS704	2	2	+	6290239	6293527	8.965	13.15	13.035	13.06	14.675	6.43	18.7	3.18	Fun	FBgn0024958	Irp-1A
PS705	2	2	+	6294484	6304885	5.23	6.245	11.19	10.105	14.085	10.52	11.79	4.495	Fun	FBgn0051151	wge
PS706	2	2	-	6308230	6310503	25.425	27.445	64.715	38.58	6.93	23.79	0.56	1.885	Fun	FBgn0039008	CG6972
PS707	2	2	+	6311048	6312103	0.45	0.745	0.615	0.3	0.22	2.155	0	0.575	Fun	FBgn0039007	CCAP
PS708	2	2	-	6312850	6314931	15.705	9.26	2.475	2.595	2.48	5.78	0.065	1.925	Fun	FBgn0039006	Cyp6d4
PS709	2	2	-	6315042	6322474	2.85	3.075	5.255	4.845	9.7	4.25	7.125	2.475	Fun	FBgn0038344	obe
PS710	2	2	+	6323360	6324170	0.765	0.63	2.3	4.53	2.125	7.26	0	0.59	Fun	FBgn0038343	Trissin
PS711	2	2	-	6324216	6325780	5.355	3.46	0.04	0.22	4.89	13.2	0.055	0.21	Fun	FBgn0019940	Rh6
PS712	2	2	-	6326007	6330193	0.41	6.385	9.975	28.64	1.59	22.61	0.715	110.685	Fun	FBgn0038342	B9d1
PS713	2	2	+	6332468	6366132	1.155	2.02	3.81	2.92	6.23	4.5	1.695	0.395	Dis	FBgn0286071	AdamTS-A
PS714	2	2	-	6366093	6368319	0.025	0.255	720.4	260.195	282.32	1410.73	0	0.085	Fun	FBgn0000047	Act88F
PS715	2	2	-	6370196	6373882	0	6.68	0	53.76	0.325	146.51	0.325	215.325	Fun	FBgn0042177	Arts
PS716	2	2	-	6373990	6376397	6.545	6.7	3.56	3.15	57.26	3.02	65.44	0.35	Fun	FBgn0037548	CG7900
PS717	2	2	-	6379135	6381746	7.84	6.48	4.805	19.01	30.05	79.8	0.175	29.025	Fun	FBgn0037547	CG7910
PS718	2	2	-	6381827	6386762	0.405	0.445	1.85	1.77	2.3	2.165	0.765	0.995	Fun	FBgn0037546	mAChR-B
PS719	2	2	-	6423336	6424101	0.085	0.1	0.21	0.765	0.135	37.985	0	99.22	Fun
PS720	2	2	-	6426214	6453625	1.525	3.095	9.725	5.425	0.85	34.06	0.615	2.88	Fun
PS721	2	2	+	6428825	6433145	4.78	10.655	3.375	2.35	1.395	1.46	0.06	0.615	Fun	FBgn0038897	CG5849
PS722	2	2	+	6434020	6437219	209.43	100.4	0.07	0	21.175	17.105	0.015	0.095	Fun	FBgn0051343	CG31343
PS723	2	2	+	6438788	6442028	22.41	20.265	0.18	0.085	31.055	57.995	0.015	0.05	Dis	FBgn0051233	CG31233
PS724	2	2	+	6443597	6446947	84.515	29.52	0.53	0.26	46.965	32.925	0.18	0.065	Fun	FBgn0051198	CG31198
PS725	2	2	+	6449442	6452593	10.87	7.77	1.52	0.83	2.79	3.985	0.015	0.115	Dis	FBgn0259237	CG42335
PS726	2	2	+	6452772	6453901	0.05	0.24	2.655	2.725	0	0.05	0.04	0.65	Fun	FBgn0038901	Burs
PS727	2	2	-	6453835	6457695	0.625	0.705	5.88	5.02	2.365	5.74	0.705	0.765	Fun	FBgn0027575	GABA-B-R2
PS728	2	2	-	6460009	6461311	1.4	2.71	3.32	3.39	10.6	1.315	8.61	1.575	Fun	FBgn0038903	RpI12
PS729	2	2	-	6462785	6464756	0	1.69	0.015	14.07	0	122.29	0.025	282.38	Fun	FBgn0034800	CG3788
PS730	2	2	-	6465500	6507862	8.03	9.97	56.485	64.605	23.66	33.325	21.515	4.825	Fun	FBgn0013759	CASK
PS731	2	2	+	6517608	6519804	0.025	0.11	0.11	0.615	0	3.725	0.015	5.54	Fun	FBgn0041229	Gr93a
PS732	2	2	-	6527512	6533072	0	0.01	0.065	0.015	0	0.01	0	0	Sil	FBgn0045470	Gr93b
PS733	2	2	-	6536548	6542367	9.03	37.215	189.62	148.125	41.075	26.025	47.46	6.975	Fun
PS734	2	2	+	6551698	6554337	13.515	17.72	16.105	25.47	23.37	26.085	23.51	57.41	Fun	FBgn0260940	lsn
PS735	2	2	-	6552602	6556476	0.295	1.84	0.955	11.61	3.05	47.32	0.46	61.335	Fun	FBgn0038909	CG6569
PS736	2	2	+	6555807	6561186	3.86	7.73	3.945	22.07	7.16	189.25	3.025	366.835	Dis	FBgn0053092	P5CDh2
PS737	2	2	-	6562752	6564096	1.835	2.92	3.74	5.1	3.33	6.26	5.71	21.96	Fun	FBgn0083984	CG34148
PS738	2	2	+	6566124	6569426	0	3.405	0.08	31.2	0.03	56.895	0.015	64.275	Fun	FBgn0051465	CG31465
PS739	2	2	-	6569285	6569753	0	0	0	0.165	1603.18	8.335	25.99	9.91	Dis	FBgn0038914	fit
PS740	2	2	-	6570019	6572058	0.215	1.325	14.185	14.11	8.625	25.93	9.665	66.975	Fun	FBgn0038916	dnd
PS741	2	2	+	6571441	6574125	1.81	2.71	8.015	6.965	10.305	3.385	12.635	2.46	Fun	FBgn0038917	CG6678
PS742	2	2	-	6574394	6575443	0	5.335	1.5	29.685	0	101.105	0	420.925	Fun	FBgn0051482	CG31482
PS743	2	2	+	6575646	6576284	0	2.03	0	12.095	0	13.71	0	168.17	Fun
PS744	2	2	+	6600683	6603627	6.275	2.935	15.225	16.42	1.42	29.795	0	0.675	Dis	FBgn0038919	Qsox2
PS745	2	2	+	6636499	6704071	2.06	7.66	495.12	507.19	9.33	31.05	2.09	3.36	Fun	FBgn0264490	Eip93F
PS746	2	2	-	6667943	6689021	0	0	5.11	7.475	0	0.11	0	0	Dis
PS747	2	2	-	6681792	6682549	0	1.67	0	12.41	0	39.285	0	295.56	Fun	FBgn0015286	Rala
PS748	2	2	-	6706076	6707092	0	0.145	6.9	7.22	0	0.05	0	0	Fun
PS749	2	2	+	6721205	6722705	0	5.54	0	27.72	0	209.855	0	384.635	Fun	FBgn0038921	Theg
PS750	2	2	-	6722657	6730006	53.89	47.115	27.48	44.595	88.945	212.935	71.48	177.04	Dis	FBgn0019960	Mitofilin
PS751	2	2	+	6729322	6730765	29.035	29.51	38.54	43.59	52.25	33.12	41.445	40.395	Fun	FBgn0038923	mRpL35
PS752	2	2	-	6730718	6731826	142.4	108.69	31.435	25.875	104.435	28.65	100.425	6.62	Fun	FBgn0038924	CG6028
PS753	2	2	+	6731940	6735639	3	3.885	7.345	8.095	15.88	3.655	19.395	1.655	Fun	FBgn0039696	Rnb
PS754	2	2	-	6735470	6736910	8.135	14.465	5.595	4.595	1.765	0.165	2.17	0.2	Fun	FBgn0262112	sro
PS755	2	2	-	6737545	6771383	27.77	35.185	18.32	18.275	22.03	59.075	6.025	8.255	Dis	FBgn0001297	kay
PS756	2	2	+	6753317	6754655	0	1.965	0	15.38	0	82.855	0	222.445	Fun	FBgn0039694	fig
PS757	2	2	-	6779547	6785467	3.935	5.4	7.18	8.295	13.965	10.13	13.045	7.24	Fun	FBgn0260990	yata
PS758	2	2	+	6785426	6786705	504.15	451.93	243.825	220.475	505.155	925.13	151.41	33.76	Fun	FBgn0020235	ATPsyngamma
PS759	2	2	-	6786685	6788938	16.67	19.205	20.59	24.625	56.775	11.38	52.19	7.22	Fun	FBgn0039691	IntS11
PS760	2	2	-	6789783	6792136	0	0.905	0	2.03	0.035	1.995	0.02	1.79	Dis	FBgn0261793	Trf2
PS761	2	2	+	6792645	6793560	9.025	15.38	20.895	21.075	59.885	59.05	128.515	183.6	Fun	FBgn0038675	CG6013
PS762	2	2	+	6794841	6806259	0.07	0.11	0.37	0.205	0.005	0.075	0	0.095	Sil	FBgn0038676	CG6026
PS763	2	2	-	6806929	6865207	4.595	5.13	15.04	16.945	17.11	39.71	22.02	56.695	Fun	FBgn0004876	cdi
PS764	2	2	-	6830776	6835919	0.555	0.695	5.23	7.905	0.15	0.53	0.085	0.26	Fun
PS765	2	2	+	6869119	6903591	2.7	3.375	10.32	8.255	3.77	4.805	1.115	4.9	Fun	FBgn0038679	CG6040
PS766	2	2	+	6904697	6906843	168.745	146.045	4.79	3.12	28.115	41.07	0.355	3.12	Fun	FBgn0038681	Cyp12a4
PS767	2	2	-	6915415	6923446	3.63	3.71	9.96	7.8	18.02	6.63	14.91	5.16	Fun	FBgn0261285	Ppcs
PS768	2	2	-	6923731	6928555	12.585	11.69	24.14	18.645	11.735	23.15	3.695	2.745	Fun	FBgn0038682	CG5835
PS769	2	2	-	6929930	6932708	7.965	12.425	10.065	25.31	40.32	110.25	85.285	160.5	Fun	FBgn0038683	CG11779
PS770	2	2	+	6932451	6935297	0.04	0.31	0.06	1.86	95.535	2.22	170.785	4.58	Dis	FBgn0002962	nos
PS771	2	2	-	6935004	6937296	6.08	9.5	7.905	10.34	32.62	6.94	47.035	8.72	Fun	FBgn0259704	Nsun5
PS772	2	2	-	6939372	6948985	5.415	3.895	7.89	3.08	0.815	2.255	0.05	0.01	Fun	FBgn0262717	Skeletor
PS773	2	2	+	6955199	6958088	39.555	29.715	27.4	21.19	61.615	36.875	41.02	3.615	Fun	FBgn0037819	CG14688
PS774	2	2	+	6958150	6961958	7.945	11.1	2.125	3.57	3.53	18.745	0.14	31.38	Fun	FBgn0037818	CG6465
PS775	2	2	+	7003000	7140035	12.08	20.82	109.45	115.685	1.805	7.795	0.035	0.515	Fun	FBgn0001235	hth
PS776	2	2	+	7149206	7198981	0	0	0	0	0	0	0	0.01	Sil
PS777	2	2	-	7210698	7212728	16.11	10.275	0.295	0.665	3.47	5.115	2.235	0.81	Fun	FBgn0037817	Cyp12e1
PS778	2	2	+	7231452	7233447	4.98	5.435	5.46	6.08	11.315	6.335	6.17	1.725	Fun	FBgn0037816	CG6345
PS779	2	2	-	7233297	7234226	4.565	6.76	7.315	12.075	36.615	5.045	35.29	5.255	Fun	FBgn0037815	Rrp46
PS780	2	2	+	7234473	7238838	26.765	20.99	32.485	28.62	34.31	15.91	21.89	2.08	Fun	FBgn0024957	Irp-1B
PS781	2	2	-	7236813	7239328	0	0	0	0.03	35.455	0	6.625	0.015	Fun
PS782	2	2	+	7240282	7244147	2.645	5.37	5.01	9.3	7.57	6.6	7.475	5.97	Fun	FBgn0037814	CG6325
PS783	2	2	-	7244075	7246177	0.275	0.715	5.85	3.78	0.045	0.045	0	0.025	Fun	FBgn0045443	mthl11
PS784	2	2	-	7246506	7248691	0	0	0.06	0.19	0.025	0.19	0	0.05	Sil	FBgn0045443	mthl11
PS785	2	2	-	7248814	7267589	4.9	5.34	7.305	9.15	5.69	67.34	2.895	72.595	Fun	FBgn0259938	cwo
PS786	2	2	+	7268329	7285505	1.01	1.81	5.035	5.105	7.78	2.785	6.49	1.48	Fun	FBgn0020379	Rfx
PS787	2	2	-	7285637	7286572	0	5.035	0.04	27.425	0	72.86	0.06	236.34	Fun
PS788	2	2	-	7286751	7299758	5.31	6.93	23.355	23.365	18.065	2.35	26.475	1.625	Fun	FBgn0015396	jumu
PS789	2	2	-	7301043	7302920	0.035	0.855	0.11	2	0.385	2.34	0.48	2.13	NA	FBgn0000246	c(3)G
PS790	2	2	-	7303926	7311628	5.925	13.17	8.625	27.18	75.625	27.82	54.88	20.695	Fun	FBgn0037810	sle
PS791	2	2	+	7310884	7332048	4.875	8.345	8.85	13.385	10.445	23.07	7.11	16.635	Dis	FBgn0266717	Bruce
PS792	2	2	+	7333355	7336974	1.275	0.615	0.615	0.495	39.17	8.205	56.025	0.765	Fun	FBgn0037807	CG6293
PS793	2	2	-	7336197	7399445	4.935	6.64	5.71	10.295	16.675	20.215	15.995	16.44	Fun	FBgn0262617	Nuak
PS794	2	2	-	7399697	7401925	13.7	26.17	21.29	84.74	49.935	61.67	41.145	64.645	Fun	FBgn0040078	pont
PS795	2	2	-	7406485	7418908	42.76	49.135	36.46	35.485	3.15	13.545	0.16	9.62	Fun	FBgn0037801	CG3999
PS796	2	2	-	7410209	7428296	0.08	0.51	0.425	3.88	1	13.525	0	8.365	Dis	FBgn0261928	CG42795
PS797	2	2	-	7441256	7444022	0	0.04	0	0.05	0	0.7	0	0.325	Sil	FBgn0039004	Nup133
PS798	2	2	-	7445314	7445914	0	4.485	0.61	51.98	0	74.405	0	135.87	Fun	FBgn0083943	CG34107
PS799	2	2	+	7445882	7446945	0.06	0.56	6.96	6.485	0.84	4.155	0	5.365	Fun	FBgn0037798	CG12817
PS800	2	2	-	7448263	7474503	0.21	0.195	1.3	0.995	0.63	3.045	0.02	0.075	Fun	FBgn0004575	Syn
PS801	2	2	+	7457720	7467721	9.605	10.995	7.125	6.115	13.94	28.855	5.535	13.905	Fun	FBgn0025879	Timp
PS802	2	2	+	7475272	7491915	7.395	8.72	15.245	12.58	3.2	10.73	0.175	0.25	Fun	FBgn0037796	CG12814
PS803	2	2	+	7493490	7501343	5.645	8.02	9.315	6.385	23.235	7.245	18.5	1.345	Fun	FBgn0040238	Best1
PS804	2	2	+	7503726	7506273	1.495	2.89	5.195	5.815	10.115	7.235	10.24	7.475	Fun	FBgn0037794	CG6254
PS805	2	2	-	7505717	7519076	3.31	7.81	13.545	11.045	16.75	9.08	16.515	6.905	Fun	FBgn0086359	Invadolysin
PS806	2	2	+	7519944	7522333	0	0.965	0	9.185	0	35.685	0	46.755	Fun	FBgn0061197	salto
PS807	2	2	-	7522310	7523507	3.945	6.77	4.925	8.54	10.27	8.475	15.72	18.905	Fun	FBgn0038491	CG5292
PS808	2	2	-	7523572	7525744	2.47	5.895	6.245	13.27	17.705	15.93	21.405	32.685	Fun	FBgn0038490	CG5285
PS809	2	2	+	7525549	7529749	1.14	7.71	3.59	48.69	9.87	169.775	12.285	207.595	Fun	FBgn0038488	m-cup
PS810	2	2	-	7530595	7530886	0	0	0	0	0	0	0	0	NA	FBgn0001321	knk
PS811	2	2	-	7536070	7539018	9.325	13.395	23.855	19.975	0.265	3.335	0.07	4.615	Dis	FBgn0001321	knk
PS812	2	2	-	7539844	7559358	16.64	26.365	42.935	61.54	87.75	37.98	65.18	23.19	Fun	FBgn0037792	TAF1B
PS813	2	2	-	7560126	7564447	0.11	1.86	0.395	4.125	1.29	5.31	1.55	4.405	Dis	FBgn0035842	Setx
PS814	2	2	-	7565857	7596582	2.87	4.055	17.165	12.375	8.095	3.75	8.385	0.99	Fun	FBgn0262127	kibra
PS815	2	2	-	7597519	7603035	3.3	7.665	4.39	5.045	29.345	20.94	50.99	12.795	Fun	FBgn0038256	CG7530
PS816	2	2	-	7608010	7618796	174.685	176.285	264.32	202.94	448.575	400.3	402.35	312.765	Fun
PS817	2	2	+	7618582	7699958	4.58	6.105	18.69	18.3	10.43	8.15	10.125	4.25	Dis	FBgn0263929	jvl
PS818	2	2	-	7624573	7637043	43.185	35.715	0.4	0.76	28.685	119.31	1.015	1.215	Fun	FBgn0038257	smp-30
PS819	2	2	+	7700856	7703619	1.055	5.14	3.4	2.135	0.36	0.9	0.065	0.275	Fun	FBgn0038260	CG14855
PS820	2	2	+	7705222	7707680	0.635	0.495	6.76	4.74	0.585	1.075	0.265	1.625	Fun	FBgn0038261	CG14856
PS821	2	2	+	7708403	7713080	2.91	2.63	1.145	0.855	0.995	2.11	0.02	0.385	Fun	FBgn0038262	CG14857
PS822	2	2	-	7714201	7733677	2.755	3.195	8.595	6.445	8.005	5.42	3.1	1.56	Dis	FBgn0266756	btsz
PS823	2	2	+	7792881	7795902	1.29	1.665	2.465	2.19	5.825	2.885	6.85	0.96	Fun	FBgn0038268	CG3631
PS824	2	2	-	7795635	7800610	2.505	4.475	4.02	10.4	11.84	28.435	14.75	40.78	Fun	FBgn0038269	Rrp6
PS825	2	2	+	7798903	7801928	2.7	3.44	3.27	4.345	11.55	6.28	27.135	10.425	Fun	FBgn0067629	CG33332
PS826	2	2	-	7801843	7803149	3.04	6.4	10.315	11.885	9.55	4.985	18.245	4.75	Fun	FBgn0004597	CycC
PS827	2	2	+	7802875	7805218	163.165	135.89	57.505	79.945	205.805	417.27	72.41	114.945	Fun	FBgn0038271	UQCR-C1
PS828	2	2	-	7805136	7806849	10.66	16.585	22.825	23.375	18.985	9.245	18.935	6.6	Fun	FBgn0038272	Dph2
PS829	2	2	+	7807066	7813020	52.99	72.575	128.805	129.28	134.155	96.275	102.545	64.215	Fun	FBgn0004227	nonA
PS830	2	2	-	7821012	7823183	6.595	8.34	7.09	13.87	25.255	9.545	41.75	11.89	Fun	FBgn0038601	CG18600
PS831	2	2	-	7830403	7830950	1.125	0	0	0.27	32.415	56.725	0.17	4.735	Fun	FBgn0040582	BomBc3
PS832	2	2	+	7831715	7832432	23.325	10.005	37.96	20.14	106.51	184.81	1.595	6.655	Fun	FBgn0038930	BomT3
PS833	2	2	-	7834466	7838868	0.1	0.225	0.205	0.215	0.16	0.775	0	0	Sil	FBgn0038929	CG13408
PS834	2	2	+	7840951	7841853	8.21	10.745	12.84	14.99	59.115	15.945	218.675	63.61	Fun	FBgn0038234	mRpL11
PS835	2	2	-	7841430	7843255	3.56	4.2	5.08	5.79	16.015	9.13	16.74	10.065	Fun	FBgn0038235	CG8461
PS836	2	2	+	7847042	7855474	6.38	8.795	6.91	11.27	30.905	42.33	31.83	18.095	Fun	FBgn0039430	CG5455
PS837	2	2	-	7855852	7914019	2.395	2.73	14.32	13.145	0.875	2.07	0.74	0.725	Fun	FBgn0039431	plum
PS838	2	2	-	7914993	7919271	7.53	10.345	18.31	17.63	43.255	17.305	54.285	8.385	Fun	FBgn0039581	Moca-cyp
PS839	2	2	+	7920701	7923291	43.025	64.855	21.76	18.915	25.275	12.8	20.285	5.605	Fun	FBgn0039580	Gfat2
PS840	2	2	+	7924246	7943236	6.19	6.785	15.5	16.18	25.11	16.955	24.56	4.5	Fun	FBgn0261618	larp
PS841	2	2	-	7925093	7925691	0	0.295	0.54	0.115	0	1.81	0	2.83	Fun
PS842	2	2	-	7957631	7957882	0	0	0	0	0	125.02	0	4.875	Dis
PS843	2	2	+	7960518	7960823	0	0.4	0	1.83	0	9.11	0	51.485	Dis
PS844	2	2	+	7961256	7964001	0	4.965	0.01	26.995	0.015	103.13	0	190.63	Fun	FBgn0039577	CG12516
PS845	2	2	-	7972597	7976439	0	22.735	0	102.265	0.035	894.94	0	1703.69	Fun	FBgn0004171	Mst98Cb
PS846	2	2	+	7981969	7983268	0	0.27	0	0.92	0	1.305	0	4.18	Fun
PS847	2	2	-	8019280	8112925	0.485	0.7	11.615	11.285	0.77	3.805	0.005	0.02	Dis	FBgn0085383	CG34354
PS848	2	2	-	8171264	8214317	1.255	1.505	27.035	26.39	1.15	5.76	0	0.03	Fun	FBgn0085391	trv
PS849	2	2	+	8276055	8277101	0	0	0.06	0	0	242.555	0	6.445	Fun	FBgn0039568	CG4815
PS850	2	2	+	8278889	8301843	22.815	20.5	30.11	23.23	13.31	25.245	1.515	3.39	Fun	FBgn0003890	betaTub97EF
PS851	2	2	-	8302922	8310329	0	5.515	0	18.215	0.03	31.025	0	85.47	Fun	FBgn0039566	CG4849
PS852	2	2	-	8303895	8307493	6.66	4.36	12.49	0.34	24.135	0	25.405	0.015	Fun	FBgn0039566	CG4849
PS853	2	2	+	8308827	8311262	3.63	4.63	7.03	5.86	21.1	10.475	24.475	9.095	Fun	FBgn0259990	CG42487
PS854	2	2	-	8310345	8313199	5.455	5.405	2.25	4.665	0.97	2.845	0.015	3.41	Fun	FBgn0039564	Nep7
PS855	2	2	+	8312799	8316238	0.59	1.655	1.305	2.58	10.31	2.44	11.84	3.2	Dis	FBgn0039563	CG4951
PS856	2	2	-	8315713	8318992	130.725	158.505	150.82	144.635	124.815	122.865	112.135	65.45	Fun	FBgn0039562	Gp93
PS857	2	2	+	8317142	8317657	0.4	0.585	2.63	0.955	0.2	0.12	0	0.115	Dis
PS858	2	2	+	8319914	8325646	6.64	8.745	11.555	17.835	22.12	45.295	29.54	62.565	Fun	FBgn0039561	mfrn
PS859	2	2	-	8326012	8330225	3.805	8.7	9.92	23.92	12.69	20.87	10.505	16.625	Fun	FBgn0039560	BOD1
PS860	2	2	+	8330292	8336238	3.01	4.885	4.98	7.83	33.56	10.29	49.92	8.14	Fun	FBgn0039559	NSD
PS861	2	2	-	8335682	8342691	9.355	9.81	10.46	18.225	27.635	28.455	24.405	32.455	Fun	FBgn0027579	mino
PS862	2	2	+	8339872	8341102	0	0.32	0.16	0.28	12.59	0.395	18.185	0.78	Fun	FBgn0051053	nenya
PS863	2	2	-	8342854	8344920	1050.81	1143.57	973.945	864.605	1068.62	263.005	920.595	143.04	Fun	FBgn0003279	RpL4
PS864	2	2	+	8345378	8346484	12.49	18.9	21.205	30.46	27.625	22.825	26.375	17.31	Fun	FBgn0039558	BCAS2
PS865	2	2	-	8346056	8351940	2.025	2.74	7.725	8.835	2.97	9.77	1.99	7.075	Fun	FBgn0085433	CG34404
PS866	2	2	+	8351200	8352882	1.665	3.26	3.545	4.505	7.29	2.24	6.75	1.85	Fun	FBgn0039859	CG11539
PS867	2	2	-	8352266	8356975	4.895	6.71	18.855	16.855	18.67	7.275	20.095	4.645	Fun	FBgn0011655	Med
PS868	2	2	+	8358843	8374618	192.59	240.615	500.23	486.975	190.325	125.925	138.83	30.605	Fun	FBgn0039858	CycG
PS869	2	2	-	8368767	8369567	1.3	0.89	3.225	2.76	0.2	0.07	0.145	0.165	Fun
PS870	2	2	-	8369645	8373388	1.96	1.825	8.16	7.965	0.275	0.175	0.045	0.2	Dis
PS871	2	2	+	8375824	8377032	2089.78	2471.03	2165.02	2035.99	1699.09	492.36	2243.83	273.08	Fun	FBgn0039857	RpL6
PS872	2	2	-	8375920	8378812	1.215	2.325	2.5	6.36	2.205	12.465	0.28	7.355	Dis	FBgn0039856	CG1774
PS873	2	2	-	8378872	8380618	18.62	18.315	12.875	13.935	28.795	20.405	24.97	9.955	Fun	FBgn0039854	CG1635
PS874	2	2	+	8380986	8382124	0	6.405	0.03	36.17	0.04	113.835	0.04	273.08	Fun	FBgn0037912	sea
PS875	2	2	-	8382047	8389601	2.29	3.975	2.945	5.42	12.475	4.815	11.14	4.41	Fun	FBgn0003268	rod
PS876	2	2	+	8389518	8394818	2.295	3.225	6.825	7.265	18.7	3.85	31.445	2.72	Dis	FBgn0043900	pygo
PS877	2	2	-	8395159	8398925	27.825	38.28	29.525	36.295	55.15	33.89	54.61	27.485	Fun	FBgn0028968	gammaCOP
PS878	2	2	-	8398944	8400195	0	0.17	0	0.355	0	2.195	0.04	4.455	Fun	FBgn0041224	Gr97a
PS879	2	2	+	8401450	8412276	1.5	2.425	4.515	6.5	9.5	4.77	9.15	3.885	Fun	FBgn0039466	CG5521
PS880	2	2	+	8416750	8422045	8.635	16.915	3.04	1.84	2.42	7.68	0.49	1.92	Fun	FBgn0039467	CG14253
PS881	2	2	-	8421941	8425096	660.02	663.275	288.795	273.55	158.915	55.385	221.18	66.455	Fun	FBgn0051075	CG31075
PS882	2	2	-	8425653	8426635	22.86	45.42	11.78	10.1	1.57	5.04	0.365	3.665	Fun	FBgn0051076	CG31076
PS883	2	2	+	8431833	8433360	0.065	0.03	0	0	0	0	0	0	Sil	FBgn0039469	TwdlC
PS884	2	2	+	8439748	8441346	0	0	0.06	0	6.185	24.205	0	0	Fun	FBgn0051077	CG31077
PS885	2	2	-	8441816	8444512	80.97	61.985	0.295	0.12	43.225	40.01	0	0	Fun	FBgn0039470	CG6296
PS886	2	2	-	8448361	8449608	2.7	19.51	0	0.065	10.245	5.94	0	0.03	Fun	FBgn0039474	CG6283
PS887	2	2	-	8452572	8453709	0.35	1.16	0.065	0	2.645	5.185	0	0	Fun	FBgn0039476	CG6271
PS888	2	2	-	8456291	8457744	0.06	0.05	0.035	0.08	11.815	18.565	0	0.51	Fun	FBgn0039476	CG6271
PS889	2	2	+	8461543	8475488	0.03	0.03	0.15	0.09	0.345	0.785	0.025	0	Sil-Dis	FBgn0004842	RYa-R
PS890	2	2	+	8484150	8484715	0.66	0.155	18.63	8.72	0.245	0.7	0	0.3	Dis	FBgn0029170	TwdlT
PS891	2	2	+	8484772	8486125	0.67	0.285	10.04	7.02	0.095	0.335	0	0	Dis	FBgn0029170	TwdlT
PS892	2	2	+	8493316	8494667	0.145	0.46	0.56	2.315	1.5	5.625	0.175	3.53	Fun	FBgn0004842	RYa-R
PS893	2	2	+	8498502	8499478	0	3.77	0	24.735	0	181.74	0	392.23	Fun	FBgn0085321	CG34292
PS894	2	2	-	8501279	8506483	3.735	3.685	1.62	2.18	21.895	5.225	20.475	2.935	Fun	FBgn0003495	spz
PS895	2	2	+	8511343	8516952	0	0	0	0	0	0	0	0.015	Sil	FBgn0039479	CG14257
PS896	2	2	-	8525653	8527244	5.18	4.345	3.83	4.205	5.56	17.805	0.13	4.165	Fun	FBgn0039481	Cpr97Eb
PS897	2	2	+	8528761	8530040	331.915	214.505	0.03	0.175	0	0.2	0	0.635	Fun	FBgn0039482	CG14258
PS898	2	2	+	8530150	8531618	1.275	0.44	0.075	0	8.07	23.985	0	0.035	Fun	FBgn0039483	CG14259
PS899	2	2	-	8531489	8534582	7.48	8.18	4.06	3.865	0.04	0.425	0.045	0.345	Fun	FBgn0243514	eater
PS900	2	2	-	8537075	8539790	3.715	2.845	0.54	0.23	0.015	0.33	0.06	0.115	NA	FBgn0243514	eater
PS901	2	2	+	8541610	8543318	1.33	0.66	0.4	1.21	1.975	15.205	0	0.29	Fun	FBgn0039485	CG17189
PS902	2	2	-	8542996	8546318	19.39	12.03	0.045	0.215	9.185	17.075	3.6	0.375	Fun	FBgn0039486	CAH9
PS903	2	2	-	8548360	8553520	10.445	12.145	20.47	25.095	24.35	9.35	37.805	7.765	Fun	FBgn0039487	gb
PS904	2	2	+	8553654	8555780	2.51	3.405	4.64	3.92	14.325	4.015	33.67	4.565	Fun	FBgn0039489	CG5880
PS905	2	2	-	8558618	8561772	0	1.575	0	8.005	0	60.31	0	82.775	Fun	FBgn0039491	CG6059
PS906	2	2	-	8562367	8586015	4.28	11.155	9.005	13.025	14.73	20.32	16.355	16.37	Fun	FBgn0039492	CG6051
PS907	2	2	-	8586200	8587443	2.965	4.69	7.215	9.005	10.595	6.51	15.345	5.695	Dis	FBgn0035159	CG13896
PS908	2	2	+	8587803	8595358	35.265	33.2	2.56	14.34	28.955	67.875	21.13	10.845	Fun	FBgn0029155	Men-b
PS909	2	2	+	8595843	8597555	11.46	13.34	16.505	11.12	2.65	3.16	0.055	0.31	Fun	FBgn0039494	grass
PS910	2	2	+	8599027	8600951	1.525	1.285	0.675	0.41	1.55	2.145	0	0.025	Fun	FBgn0039495	CG5909
PS911	2	2	-	8603409	8604061	21.33	17.98	18.86	22.755	46	24.655	107.48	17.305	Fun	FBgn0085322	CG34293
PS912	2	2	+	8604374	8605856	0.125	0.14	0.105	0.695	2.405	0.62	3.91	0.905	Dis	FBgn0003482	spn-D
PS913	2	2	-	8610771	8612231	0	0	0	0.04	0.03	0	0	0	Sil-Dis	FBgn0004197	Ser
PS914	2	2	-	8624394	8645487	2.315	3.365	16.32	12.07	0.025	0.345	0.005	0.04	Fun	FBgn0004197	Ser
PS915	2	2	-	8683326	8685168	20.185	17.865	9.97	15.58	22.17	46.89	18.18	139.625	Fun	FBgn0261995	CG42813
PS916	2	2	+	8685608	8687357	164.715	142.905	86.605	90.5	157.51	291.68	118.545	175.77	Fun	FBgn0039635	Pdhb
PS917	2	2	+	8689087	8691236	7.78	12.1	16.01	23.325	23.705	22.165	51.68	45.045	Fun	FBgn0039636	Atg14
PS918	2	2	-	8690999	8696255	1.69	2.72	5.15	5.7	25.29	3.835	30.28	2.08	Fun	FBgn0005596	yem
PS919	2	2	+	8696423	8702362	7.49	13.265	33.285	30.655	17.385	9.62	20.055	9.905	Fun	FBgn0039637	Ctl2
PS920	2	2	-	8701639	8702691	2.805	7.575	8.5	23.93	29.555	23.355	52.185	29.245	Fun	FBgn0039638	dgt6
PS921	2	2	+	8704907	8711938	19.185	24.12	27.925	22.51	37.79	30.58	27.31	14.185	Fun	FBgn0028671	Vha100-1
PS922	2	2	-	8711557	8712496	0.925	1.405	3.665	2.715	5.12	1.18	8.255	0.9	Fun	FBgn0039639	Alg13
PS923	2	2	+	8712609	8719801	1.635	1.84	1.205	1.895	73.025	1.3	64.615	0.43	Fun	FBgn0039640	superdeath
PS924	2	2	-	8719598	8720952	3.69	3.9	8.72	9.44	4.305	2.56	3.61	0.26	Fun	FBgn0039641	CG14511
PS925	2	2	+	8721265	8722122	1.13	3.165	4.6	4.98	1.41	2.285	1.6	0.86	Dis
PS926	2	2	-	8721592	8723567	5.815	14.375	33.43	38.99	14.3	14.22	13.29	18.43	Fun	FBgn0039642	CG11882
PS927	2	2	+	8722874	8724089	802.44	634.81	110.61	87.47	474.66	837.2	189.335	17.38	Fun	FBgn0014869	Pglym78
PS928	2	2	-	8723582	8727430	7.775	10.37	10.9	13.725	36.795	15.74	74.275	44.335	Fun	FBgn0041588	eIF2D
PS929	2	2	-	8730940	8745781	4.17	5.915	34.82	30.07	0.61	1.77	0.03	1.415	Fun	FBgn0004644	hh
PS930	2	2	-	8753954	8754597	0	0	0	0	0	0	0	0	Sil
PS931	2	2	-	8754865	8763366	4.16	6.865	11.405	12.2	10.22	5.595	21.17	4.27	Dis	FBgn0004395	unk
PS932	2	2	+	8764603	8768388	2.88	3.155	5.33	4.555	5.965	0.905	4.965	0.38	Fun	FBgn0039508	CG3368
PS933	2	2	-	8768158	8769335	16.035	21.45	19.705	26.13	28.575	19.155	20.405	10.13	Fun	FBgn0039509	bigmax
PS934	2	2	+	8769648	8772196	72.805	81.14	146.825	124.385	69.935	30.78	39.585	10.965	Fun	FBgn0015737	Hmu
PS935	2	2	-	8772094	8772838	360.725	297.24	46.76	62.96	58.58	31.085	53.48	2.355	Fun	FBgn0040609	CG3348
PS936	2	2	+	8789215	8860115	0.435	0.325	1.57	0.75	2.23	0.545	0.77	0.255	Fun	FBgn0260487	CG42534
PS937	2	2	-	8803029	8824663	0	1.525	0	9.55	0.005	31.78	0	51.675	Fun	FBgn0267433	kl-5
PS938	2	2	-	8862031	8926452	0.365	0.31	4.37	3.17	0.475	1.93	0.025	0.075	Fun	FBgn0016061	side
PS939	2	2	+	8955139	8958329	0	3.015	0.01	58.755	0.035	42.215	0.025	57.425	Fun	FBgn0039010	CG4907
PS940	2	2	+	8962893	8964927	0	0.73	0.015	6.18	0	7.725	0	8.545	Fun	FBgn0033963	CG12857
PS941	2	2	-	8990940	8991435	128.95	221.67	0	0	2.63	0.135	0	0	Fun	FBgn0262613	CG43139
PS942	2	2	-	8991528	8992375	6.64	4.815	0.045	0.08	0	0	0	0.065	Fun
PS943	2	2	-	9005514	9006889	0	0	0.25	0.385	0	0.1	0	0	Sil	FBgn0039522	CG13972
PS944	2	2	+	9009520	9023890	0.02	0.06	0.395	0.26	0.055	0.06	0	0	Sil	FBgn0039523	CG12885
PS945	2	2	-	9023897	9035466	8.09	18.805	28.235	22.685	20.265	10.855	21.265	4.69	Fun	FBgn0004387	Klp98A
PS946	2	2	-	9036051	9065554	28.265	33.45	112.95	96.5	41.86	39.96	32.115	13.01	Fun	FBgn0027492	wdb
PS947	2	2	+	9042039	9042661	0.195	1.095	3.065	4.51	0.235	0.365	0.15	0	Dis
PS948	2	2	+	9061072	9064532	7.47	8.735	6.045	6.21	37.74	8.115	36.26	5.125	Dis	FBgn0010926	l(3)07882
PS949	2	2	+	9065317	9067369	2.06	5.19	5.63	9.81	26.71	5.22	43.63	8.135	Fun	FBgn0035955	CG5194
PS950	2	2	+	9068474	9070617	8.02	16.31	17.08	49.15	30.69	68.395	32.71	106.74	Fun	FBgn0038515	CG5823
PS951	2	2	-	9076570	9078710	0	0.43	0	2.075	0.035	17.13	0.035	23.39	Fun
PS952	2	2	+	9105594	9108968	0.165	0.055	1.38	1.19	0.225	2.135	0	1.085	Dis	FBgn0261046	Dscam3
PS953	2	2	+	9109553	9117521	0.185	0.335	3.415	3.105	0.29	2.16	0.045	0.715	Fun	FBgn0261046	Dscam3
PS954	2	2	-	9128692	9135848	0	0	0	0	0	0	0	0	Sil
PS955	2	2	+	9139915	9140422	0	0.79	0	6.5	0	37.215	0	137.275	Fun	FBgn0038512	CG14330
PS956	2	2	+	9147339	9149589	0.555	0.79	0.995	0.865	0	0.275	0	0	Sil	FBgn0000564	Eh
PS957	2	2	-	9150132	9172571	1.215	2.07	5.91	3.685	0.125	0.515	0.06	0.24	Fun	FBgn0038511	cysu
PS958	2	2	+	9162123	9162533	0.25	0.955	21.67	37.795	0	0.225	0	0	Fun	FBgn0264899	CG44090
PS959	2	2	+	9163891	9164306	3.71	19.225	15.265	41.07	0	0	0	0.435	Fun	FBgn0264899	CG44090
PS960	2	2	-	9176380	9177071	36.9	352.63	0	0.095	0	0.22	0	0.31	Fun
PS961	2	2	+	9177864	9178563	10.69	313.015	0	0.095	0	0.07	0.065	0	Fun
PS962	2	2	+	9178954	9181236	0	0.83	0	4.655	0	4.555	0	6.37	Fun	FBgn0052246	CG32246
PS963	2	2	-	9181151	9182043	99.695	285.94	0.04	0.3	0.105	0.33	0	0.23	Fun	FBgn0038508	CG5866
PS964	2	2	+	9181572	9181979	0.975	4.11	0	0.765	0	0.645	0	0.19	Dis
PS965	2	2	-	9182321	9182902	0.135	0.275	0	0	10.375	33.35	7.1	0.235	Fun	FBgn0038631	CG7695
PS966	2	2	-	9183876	9184453	39.615	38.245	0.785	1.555	0.12	1.49	2.145	0.595	Fun	FBgn0262004	CG42822
PS967	2	2	-	9184694	9185338	48.065	26.625	0	1.205	17.655	27.095	322.115	22.5	Fun	FBgn0262004	CG42822
PS968	2	2	-	9185816	9187078	5.505	3.82	0	0	0	0	0.035	0	Fun	FBgn0038507	CG5863
PS969	2	2	-	9187345	9190616	29.22	14.6	0	0	0.035	11.805	0.02	6.995	Fun	FBgn0038505	CG17283
PS970	2	2	-	9191061	9191892	2.585	269.135	0.605	2.36	0	3.9	0	0.715	Fun	FBgn0261932	CG42798
PS971	2	2	+	9192119	9196074	46.56	87.355	0.355	4.43	0	48.16	0	87.9	Dis	FBgn0262005	CG42823
PS972	2	2	+	9196518	9197745	286.95	379.265	0.055	0	0	0.165	0	0.24	Dis	FBgn0262005	CG42823
PS973	2	2	+	9198922	9200084	17.255	52.035	0	4.85	0	47.25	0	183.14	Fun	FBgn0085308	CG34279
PS974	2	2	+	9200295	9210510	12.355	14.935	24.845	25.75	25.39	21.66	24.31	15.465	Fun	FBgn0038504	Sur-8
PS975	2	2	-	9210550	9213428	15.205	29.485	29.3	42.78	42.5	62.38	37.825	92.185	Fun	FBgn0028992	sds22
PS976	2	2	+	9210708	9212177	99.625	229.86	370.96	521.485	34.485	22.525	26.35	16.59	Dis	FBgn0025456	CREG
PS977	2	2	+	9213455	9232672	2.885	5.2	6.535	13.795	9.485	15.515	10.82	17.33	Fun	FBgn0038499	Brf
PS978	2	2	-	9215266	9219009	12.35	16.01	24.11	23.94	22.505	18.835	12.005	6.955	Fun	FBgn0262871	lute
PS979	2	2	+	9241917	9287608	0.665	1.045	9.03	7.325	0.92	4.38	0	0.105	Fun	FBgn0038498	beat-IIa
PS980	2	2	-	9281609	9284160	0.075	3.615	0	25.2	0	24.11	0	26.355	Fun	FBgn0052707	APC4
PS981	2	2	-	9320426	9321279	0	0	0	0	0	294.84	0	9.62	Dis	FBgn0051419	CG31419
PS982	2	2	+	9338096	9369710	0.335	0.46	7.525	4.53	1.12	3.325	0.1	0.1	Fun	FBgn0038494	beat-IIb
PS983	2	2	-	9368188	9369060	0	0	0	0	0	3.36	0	0.165	Fun
PS984	2	2	-	9369917	9370895	0	0	0.07	0.065	0	30.225	0	0.925	Fun	FBgn0050281	CG30281
PS985	2	2	+	9396742	9445015	2.255	7.36	43.98	32.905	0.06	0.455	0.005	0.62	Dis	FBgn0038492	Mur89F
PS986	2	2	+	9445714	9453760	3.19	4.435	5.84	6.145	13.82	7.23	15.805	3.835	Fun	FBgn0038890	CG7956
PS987	2	2	+	9455719	9499855	2.325	2.54	2.36	1.81	3.27	0.91	2.115	0.18	Dis	FBgn0003118	pnt
PS988	2	2	+	9499919	9529734	1.325	4.275	4.44	15.45	1.785	82.125	0.985	152.435	Fun	FBgn0039071	bb8
PS989	2	2	+	9530003	9532118	0.07	4.24	0.13	30.545	0.055	123.985	0.075	187.86	Fun	FBgn0039070	wam
PS990	2	2	-	9532570	9538265	1.79	3.84	4.13	7.625	10.315	5.255	7.975	3.735	Fun	FBgn0025781	Cdc16
PS991	2	2	+	9538941	9562715	0.075	2.83	1.205	13.15	56.38	197.62	38.795	190.785	Fun	FBgn0264307	orb2
PS992	2	2	-	9552553	9553877	0	1.51	0	6.73	0	6.96	0	25.265	Fun	FBgn0035640	mad2
PS993	2	2	-	9567200	9569470	11.02	19.685	10.025	8.27	20.895	6.18	20.515	1.19	Fun	FBgn0039068	CG13827
PS994	2	2	+	9569417	9572720	1.855	2.99	3.6	5.49	15.84	4.835	29.13	3.855	Fun	FBgn0039067	wda
PS995	2	2	-	9572402	9576748	6.005	10.105	10.175	15.845	42.59	18.58	38.565	12.755	Fun	FBgn0039066	EloA
PS996	2	2	+	9576826	9579022	2.515	10.73	11.69	53.41	33.155	65.525	69.865	101.37	Dis	FBgn0039065	Rad60
PS997	2	2	+	9597612	9606371	0.265	0.58	3.91	3.39	1.215	4.915	0.33	0.025	Fun	FBgn0039064	CG4467
PS998	2	2	+	9607185	9659263	54.215	65.055	45.74	46.32	39.12	20.145	40.445	7.655	Fun	FBgn0262975	cnc
PS999	2	2	-	9660034	9663338	14.855	15.895	8.84	7.1	58.5	14.075	96.445	2.36	Fun	FBgn0265042	Irk1
PS1000	2	2	+	9685234	9686071	0	4.33	0	27.665	0	20.725	0	39.475	Fun	FBgn0039059	CG13829
PS1001	2	2	+	9688586	9689963	0	2.85	0.05	26.825	0	30.39	0	45.755	Fun	FBgn0039058	VhaAC39-2
PS1002	2	2	+	9690262	9697241	4.035	4.62	10.855	9.365	11.16	3.325	10.275	1.51	Fun	FBgn0039507	mrt
PS1003	2	2	-	9696523	9699822	7.005	14.605	21.875	40.515	31.735	41.665	45.03	65.555	Fun	FBgn0046247	CG5938
PS1004	2	2	+	9699882	9708660	7.005	10.29	14.29	13.93	13.73	5.915	16.06	3.495	Dis	FBgn0002441	l(3)mbt
PS1005	2	2	-	9708488	9710101	0.03	4.265	0.56	17.56	0.55	176.425	0.495	280.815	Fun	FBgn0039504	CG14260
PS1006	2	2	+	9710047	9711148	0.05	4.53	0.465	15.545	0.125	108.42	0	877.545	Fun	FBgn0039503	CG14262
PS1007	2	2	-	9711334	9712962	0.155	0.165	0.83	0.44	2.28	1.345	2.205	1.54	Fun	FBgn0000119	arr
PS1008	2	2	+	9714409	9722024	6.21	8.48	15.92	14.595	27.88	6.71	34.145	2.82	Fun	FBgn0010328	woc
PS1009	2	2	-	9721948	9725101	18.21	31.91	37.89	39.735	66.08	21.31	75.46	9.875	Fun	FBgn0011289	TfIIA-L
PS1010	2	2	+	9725315	9730164	2.61	4.815	7.88	16.765	7.37	68.195	10.4	94.31	Fun	FBgn0039501	TTLL6B
PS1011	2	2	+	9730654	9732112	0.885	0.535	0.785	0.17	0.545	2.23	0.1	1.1	Fun	FBgn0039500	CG5984
PS1012	2	2	+	9732872	9735647	11.735	18.76	59.365	47.215	7.485	16.6	4.01	12.275	Fun	FBgn0042111	CG18766
PS1013	2	2	-	9735357	9737595	1.77	1.625	0.65	1.26	14.67	1.135	22.12	0.875	Fun	FBgn0005696	PolA2
PS1014	2	2	+	9737648	9749503	5.2	6.755	10.255	9.42	13.37	10.335	17.385	7.455	Dis	FBgn0051064	CG31064
PS1015	2	2	-	9742554	9745255	0	1.72	0.01	15.92	0	24.08	0	28.425	Dis	FBgn0051068	CG31068
PS1016	2	2	+	9750135	9756427	2.585	3.495	11.085	9.26	11.435	7.845	7.595	2.59	Fun	FBgn0039634	alpha-Man-Ib
PS1017	2	2	-	9753687	9797951	2.97	4.615	24.91	21.705	5.765	4.98	5.32	2.02	Dis	FBgn0039633	CG11873
PS1018	2	2	-	9799089	9799620	0	0	0	0	0	0	0	0	Sil-Dis	FBgn0015781	P5cr
PS1019	2	2	+	9807780	9824666	0.08	0.09	0.22	0.265	0.005	0.24	0	0.195	Sil	FBgn0038339	CG6118
PS1020	2	2	+	9829501	9831657	0.195	0.155	1.04	1.57	0.035	0.095	0	0.02	Fun
PS1021	2	2	-	9829590	9837708	28.53	59.5	124.245	122.055	44.01	34.825	28.23	9.075	Fun	FBgn0041188	Atx2
PS1022	2	2	+	9839291	9844710	8.91	7.175	0.485	0.775	5.19	11.215	0.925	0.895	Fun	FBgn0038337	CG6125
PS1023	2	2	-	9844480	9858585	1.08	1.33	3.775	3.975	1.34	9.365	0.03	0.87	Fun	FBgn0262483	Rbp
PS1024	2	2	+	9869204	9870322	0	5.145	0	32.26	0	75.795	0	132.425	Fun	FBgn0038334	h-cup
PS1025	2	2	-	9877242	9879865	13.25	20.015	34.945	35.115	64.835	44.37	82.41	69.85	Fun	FBgn0038331	Ccm3
PS1026	2	2	+	9879124	9884495	1.345	2.485	2.53	8.555	2.46	53.365	3.48	119.63	Fun	FBgn0038330	CG14868
PS1027	2	2	+	9884648	9885571	11.83	13.935	14.115	13.44	22.24	11.405	19.555	7.21	Fun	FBgn0053977	Dpm3
PS1028	2	2	+	9886390	9889939	155.88	180.245	385.47	313.99	165.75	85.335	102.49	46.845	Fun	FBgn0038149	GILT1
PS1029	2	2	+	9894085	9897604	40.09	50.97	83.835	57.805	11.915	14.975	0.085	0.405	Fun	FBgn0038147	CCHa2
PS1030	2	2	+	9898421	9901774	4.14	4.47	3.62	4.5	14.425	3.175	15.555	2.24	Fun	FBgn0038146	CG9799
PS1031	2	2	-	9902469	9905380	74.53	102.315	141.63	160.025	288.515	323.075	419.06	336.115	Fun	FBgn0038145	Droj2
PS1032	2	2	+	9905569	9911159	2.23	3.455	10.57	9.37	16.13	30.615	10.54	10.545	Fun	FBgn0038143	CG9813
PS1033	2	2	+	9912817	9914941	4.37	27.395	0	0	1.345	0.645	0	0.035	Dis	FBgn0023495	Lip3
PS1034	2	2	-	9914847	9915634	0	0	0	0	4.34	29.97	0	0	Fun	FBgn0038142	CheA87a
PS1035	2	2	-	9915752	9919123	18.455	11.95	5.5	2.79	29.04	9.96	34.03	0.04	Fun	FBgn0027610	Dic1
PS1036	2	2	+	9917490	9922832	31.825	40.98	79.61	69.545	138.75	23.46	397.395	40.105	Fun	FBgn0086371	poly
PS1037	2	2	-	9937589	9943853	0.12	0.555	0.685	0.325	0.03	0.23	0.015	0.43	Sil	FBgn0038140	PK2-R1
PS1038	2	2	+	9948113	9952834	1.545	8.39	0.095	0.14	0.145	0.115	0.05	0	Fun	FBgn0038139	PK2-R2
PS1039	2	2	-	9965360	9965673	0	0	0.19	0	2798.41	4676.59	0	0	Fun	FBgn0266455	CG45080
PS1040	2	2	-	9967003	9968495	0	0	0	0	3.715	0.205	0	0.03	Dis	FBgn0053145	GalT1
PS1041	2	2	-	9969427	9979198	72.165	48.89	22.795	23.76	60.39	28.85	38.59	23.3	Fun	FBgn0052473	CG32473
PS1042	2	2	-	9977929	9978341	24.09	17.035	0	0	2.73	0.88	0	0	Fun	FBgn0262844	CG43208
PS1043	2	2	-	9979520	9983317	37.65	17.04	0.01	0.015	4.395	2.69	0	0.025	Fun	FBgn0038136	CG8774
PS1044	2	2	-	9983611	9987300	28.955	16.865	0.015	0.015	4.61	5.085	0.025	0.05	Fun	FBgn0038135	CG8773
PS1045	2	2	+	9988923	9990037	0.095	0.055	0	0	0.035	0	0	0	Sil	FBgn0038134	wntD
PS1046	2	2	-	9990983	9992325	0	0	26.245	10.41	0.22	0.035	0	0	Fun	FBgn0038133	Osi22
PS1047	2	2	+	9994133	9997529	0	0.035	0.075	0.15	0	0.13	0	0	Sil	FBgn0038131	CG15888
PS1048	2	2	-	9997894	10003123	6.19	3.945	3.63	2.61	1.255	22.945	0.04	0.52	Fun	FBgn0038130	CG8630
PS1049	2	2	+	10012966	10017346	11.705	14.145	20.73	20.425	20.87	9.055	23.2	6.845	Fun	FBgn0265190	PIG-S
PS1050	2	2	+	10024993	10034147	0.115	0.16	4.94	3.4	0.25	1.54	0	0.025	Fun	FBgn0040601	CG13643
PS1051	2	2	-	10028559	10030297	0	2.31	0.02	12.315	0.02	121.925	0	183.035	Fun	FBgn0039246	CG10845
PS1052	2	2	-	10033915	10037254	5.11	8.055	53.045	39.26	6.74	2.08	0.3	0.11	Fun	FBgn0039244	CG11069
PS1053	2	2	+	10037279	10049809	4.44	6.635	35.17	25.615	3.94	3.025	0.2	0.27	Fun	FBgn0051121	CG31121
PS1054	2	2	-	10049779	10057267	65.215	111.09	78.81	54.005	41.755	12.81	32.57	3.705	Fun	FBgn0039241	CG11089
PS1055	2	2	+	10054130	10059423	67.925	64.765	128.71	109.14	91.28	30.615	76.475	12.505	Fun	FBgn0037537	CG2767
PS1056	2	2	-	10058528	10063609	9.65	12.635	14.825	26.62	12.01	49.09	9.155	63.555	Fun	FBgn0037536	CG2698
PS1057	2	2	+	10063547	10064818	7.805	13.405	20.77	39.18	23.255	18.395	40.365	63.955	Fun	FBgn0266598	Kmn2
PS1058	2	2	-	10064198	10065258	2.975	4.49	6.625	9.815	14.075	8.22	19.105	8.945	Dis	FBgn0037535	PIG-H
PS1059	2	2	+	10065350	10075055	7.11	10.765	31.02	27.79	18.335	13.8	18.55	7.395	Fun	FBgn0024555	flfl
PS1060	2	2	+	10075199	10076679	0.08	0	1.9	1.98	0.185	0.96	0	0.34	Fun	FBgn0038170	CG14367
PS1061	2	2	-	10076622	10082155	5.915	9.86	3.3	20.28	12.05	215.925	12.565	195.38	Dis	FBgn0028487	f-cup
PS1062	2	2	+	10081835	10084487	0.085	0.115	4.585	4.225	5.775	20.775	0	0.905	Fun	FBgn0002937	ninaB
PS1063	2	2	-	10084338	10086515	20.76	16.195	6.905	4.095	6.82	4.59	1.37	0.565	Fun	FBgn0038172	Adgf-D
PS1064	2	2	+	10086495	10090149	4.075	2.51	0.015	0.835	3.675	1.64	0.155	0.835	Fun	FBgn0038173	Adgf-C
PS1065	2	2	-	10089999	10090966	8.05	5.09	0.695	0.93	8.95	11.93	0.905	0.385	Fun	FBgn0051469	CG31469
PS1066	2	2	-	10091141	10092460	20.31	24.075	20.395	22.115	63.81	19.105	56.755	8.345	Fun	FBgn0040077	primo-1
PS1067	2	2	+	10096171	10144274	1.525	2.19	13.015	10.73	4.895	7.785	0.87	0.405	Fun	FBgn0085412	kmr
PS1068	2	2	-	10098678	10099516	0	5.54	0	25.035	0	252.585	0	1219.53	Fun	FBgn0267383	Ubc87F
PS1069	2	2	+	10144972	10146135	40.66	54.06	72.745	60.63	4.925	8.015	0.095	0.435	Fun	FBgn0038179	CG9312
PS1070	2	2	+	10146542	10149301	3.05	6.005	181.395	157.75	0.285	1.46	0.035	1.05	Fun	FBgn0038180	Cht5
PS1071	2	2	-	10147886	10148849	0	0.135	1.71	1.52	0	0	0	0	Dis
PS1072	2	2	+	10150039	10157668	218.565	135.65	0.135	0.045	128.89	634.025	0.13	0.18	Fun	FBgn0038181	CG9297
PS1073	2	2	-	10152977	10154789	3.84	2.775	0	0	0.385	0.825	0	0	Fun
PS1074	2	2	-	10156317	10157650	1.69	1.665	0	0	0.175	0.755	0	0	Fun
PS1075	2	2	+	10159108	10162211	2.495	2.46	2.5	2.92	10.535	2.785	6.755	1.4	Fun	FBgn0039588	mIF2
PS1076	2	2	+	10163272	10185146	12.805	8.515	8.84	5.45	1.955	1.505	0.62	0.09	Fun	FBgn0003137	Ppn
PS1077	2	2	+	10185288	10186409	0.905	0.785	8.17	7.89	1.27	4.04	0.085	3.44	Fun	FBgn0051051	CG31051
PS1078	2	2	-	10186225	10221175	0.01	0.77	0.055	3.69	1.41	5.025	0.43	4.065	Fun	FBgn0013813	Dhc98D
PS1079	2	2	-	10234934	10294582	0.805	0.935	14.11	12.585	1.065	4.635	0.02	0.06	Fun	FBgn0039584	beat-VI
PS1080	2	2	-	10361238	10362850	0	0	0	0	0	0	0	0	Sil	FBgn0039582	Or98b
PS1081	2	2	+	10373097	10374806	0	2.855	0	12.205	0	112.955	0.025	193.05	Fun	FBgn0260461	Rcd7
PS1082	2	2	+	10376021	10445714	6.705	8.94	35.865	37.155	14.595	16.545	13.855	7.335	Dis	FBgn0263289	scrib
PS1083	2	2	-	10447225	10449219	0	0.065	0	0.35	0	2.935	0	4.365	Fun
PS1084	2	2	+	10461751	10463191	0.3	0	0	0	0.06	0	0.035	0.035	Sil-Dis	FBgn0039434	TwdlM
PS1085	2	2	-	10463274	10464342	57.935	5.135	0	0	0	0	0	0	Fun	FBgn0039435	TwdlP
PS1086	2	2	-	10465349	10466520	0.1	0.07	0	0	0	0	0	0	Sil	FBgn0039434	TwdlM
PS1087	2	2	-	10467625	10468830	0.065	0.27	0.085	0.055	0	0	0	0	Sil	FBgn0039434	TwdlM
PS1088	2	2	-	10469107	10469930	0.275	0.225	0.09	0	0	0	0	0	Sil	FBgn0039438	TwdlO
PS1089	2	2	-	10471178	10472120	0	0	0	0	0	0	0.045	0	Sil	FBgn0039439	TwdlK
PS1090	2	2	+	10473241	10474470	0	0.04	0	0	0	0	0	0	Sil	FBgn0039440	TwdlJ
PS1091	2	2	+	10475441	10476531	0	0	0	0.055	0.04	0.045	0	0	Sil	FBgn0039441	TwdlN
PS1092	2	2	+	10476941	10480140	0.02	0	0	0	0	0	0	0	Sil	FBgn0051081	TwdlR
PS1093	2	2	+	10480971	10481919	0	0	0	0.09	0	0.06	0	0	Sil	FBgn0039443	TwdlS
PS1094	2	2	+	10483480	10485426	0	0.38	0	1.025	0.04	3.86	0	4.9	Fun	FBgn0039444	TwdlD
PS1095	2	2	-	10489817	10509244	0.34	0.535	2.11	2.345	0.39	2.345	0	0.125	Dis	FBgn0250908	beat-VII
PS1096	2	2	+	10500791	10503081	0	0.065	0	0.43	0.135	1.535	0	1.845	Fun	FBgn0243586	Tb
PS1097	2	2	-	10539824	10540856	0	0	0	0	0	0.045	0	0	Sil	FBgn0039448	TwdlQ
PS1098	2	2	-	10545321	10563037	1.025	1.42	2.89	1.875	1.915	7.235	0	0.165	Fun	FBgn0023179	amon
PS1099	2	2	-	10563863	10565908	1.325	3.105	3.075	8.065	14.385	4.185	19.555	4.705	Fun	FBgn0039449	CG6425
PS1100	2	2	+	10566644	10568717	24.225	28.835	25.965	36.385	47.76	39.46	59.35	51.495	Fun	FBgn0039450	Yif1
PS1101	2	2	-	10568527	10574852	1.975	2.125	3.355	5.355	12.31	10.655	12.2	7.25	Fun	FBgn0039451	CG6420
PS1102	2	2	+	10577251	10579414	2.42	3.91	3.89	10.335	21.88	12.62	20.195	14.99	Fun	FBgn0038649	PGS1
PS1103	2	2	+	10579735	10589604	6.235	7.095	8.12	7.49	19.235	6	20.025	2.395	Fun	FBgn0024329	Mekk1
PS1104	2	2	-	10589567	10615226	93.025	76.14	7.265	5.495	2.55	10.835	0.005	0	Fun	FBgn0000303	ChAT
PS1105	2	2	+	10594169	10595259	862.395	948.57	0.295	0.145	0.665	0.775	0	0.05	Dis	FBgn0038646	CG7715
PS1106	2	2	+	10595942	10597033	626.165	576.935	0.07	0.41	0.04	0.375	0	0.78	Fun	FBgn0038645	CG7714
PS1107	2	2	-	10624919	10625514	5705.61	5022.66	0.785	0.695	2.395	3.57	0	0.12	Fun	FBgn0085311	CG34282
PS1108	2	2	+	10627121	10627791	2949.47	2957.63	0.915	0.315	2.96	11.225	0	0	Fun	FBgn0038643	CG14300
PS1109	2	2	+	10628757	10632985	0.245	0.18	0.08	0	0.01	0.015	0	0	Sil	FBgn0038642	Muc91C
PS1110	2	2	-	10633813	10639924	0.535	0.52	1.815	1.505	1.03	4.78	0	0.01	Fun	FBgn0038641	ChT
PS1111	2	2	-	10640294	10642979	3.965	5.7	8.92	7.78	11.215	4.1	13.495	1.81	Fun	FBgn0038640	CG7706
PS1112	2	2	+	10643096	10651592	0.455	1.285	1.56	3.165	5.57	8.93	5.98	8.19	Fun	FBgn0002905	PolQ
PS1113	2	2	-	10649970	10650915	38.92	49.465	43.76	61.4	81.905	82.875	202.585	482.48	Fun	FBgn0038080	CG12279
PS1114	2	2	-	10654348	10667155	30.97	40.435	45.92	45.95	44.34	51.15	46.385	54.235	Fun	FBgn0016693	Past1
PS1115	2	2	+	10666212	10669055	10.89	17.255	23.02	22.45	23.805	32.18	30.28	80.085	Fun	FBgn0005355	Su(fu)
PS1116	2	2	+	10669168	10677339	4.08	4.035	2.54	2.48	14.345	6.575	3.285	0.805	Fun	FBgn0001296	kar
PS1117	2	2	-	10678850	10702113	1.04	2	4.55	3.48	0.235	1.62	0	0.025	Fun	FBgn0008651	lbl
PS1118	2	2	-	10709970	10728708	0.015	0.02	0.005	0.01	0	0.08	0	0.05	Sil	FBgn0011278	lbe
PS1119	2	2	+	10733672	10735270	34.035	28.915	0	0	0	0	0	0	Fun	FBgn0029172	Fad2
PS1120	2	2	-	10749060	10749657	0	1.685	0	22.27	0	49.005	0	152.08	Fun	FBgn0036090	CG8009
PS1121	2	2	+	10755044	10759798	1.9	2.645	3.335	3.725	13.975	3.11	19.035	2.305	Fun	FBgn0038889	Fancm
PS1122	2	2	+	10771622	10784152	1.21	1.755	7.18	6.215	0.06	0.235	0.02	0	Fun	FBgn0004863	C15
PS1123	2	2	+	10794251	10830085	3.485	4.615	13.95	11.105	7.93	3.295	5.82	1.05	Dis	FBgn0265140	Meltrin
PS1124	2	2	-	10830768	10832518	6.26	11.21	15.335	23.89	46.225	14.59	76.52	15.995	Fun	FBgn0038251	Hexim
PS1125	2	2	-	10833772	10835763	36.625	38.585	16.105	17.365	7.92	5.935	6.435	5.895	Fun	FBgn0038250	CG3505
PS1126	2	2	+	10835757	10848387	7.855	10.835	32.905	29.29	20.75	7.345	22.65	2.625	Fun	FBgn0086686	l(3)L1231
PS1127	2	2	+	10848468	10863723	1.175	5.77	6.185	51.39	0.77	151.705	1.905	169.35	Fun	FBgn0038248	CG7886
PS1128	2	2	-	10848882	10853158	0.04	0.39	0.87	1.445	2.5	1.06	0.11	1.09	Dis	FBgn0038247	Cad88C
PS1129	2	2	-	10863508	10865428	464.72	657.805	1662.2	1657.69	422.1	353.375	1856.44	606.35	Fun	FBgn0053909	His4:CG33909
PS1130	2	2	+	10864992	10871399	9.185	12.095	32.68	29.515	28.535	10.23	44.21	5.065	Fun	FBgn0003169	put
PS1131	2	2	-	10871353	10874879	0.295	0.305	4.07	3.51	0.655	4.11	0	0.255	Fun	FBgn0038246	CG14853
PS1132	2	2	+	10879577	10886743	24.29	30.815	41.99	48.895	52.91	41.995	141.78	87.255	Fun	FBgn0039259	EMC6
PS1133	2	2	-	10882441	10886385	3.155	3.28	3.46	4.16	18.52	6.945	19.15	5.545	Fun	FBgn0015240	Hr96
PS1134	2	2	-	10886503	10887995	7.8	9.195	15.47	17.9	30.6	8.83	39.915	7.615	Fun	FBgn0039258	beta4GalT7
PS1135	2	2	-	10888829	10890351	0.035	16.465	0.225	41.13	0.085	55.975	0.17	93.46	Fun	FBgn0020369	Rpt6
PS1136	2	2	-	10891386	10932578	0.88	3.915	67.13	50.255	0.425	1.735	0.015	3.415	Fun	FBgn0039257	tnc
PS1137	2	2	+	10893780	10894176	0	0	2.5	0.73	0	0	0	0	Dis
PS1138	2	2	-	10966367	10968605	0.025	0.13	10.345	9.3	0.055	0.045	0	0	Fun	FBgn0285912	mah
PS1139	2	2	-	10968758	10971627	6.555	7.245	7.06	10.045	21.405	13.105	24.4	6.81	Fun	FBgn0039254	Nmnat
PS1140	2	2	+	10971134	10977741	6.08	9.27	10.465	15.17	38.1	56.72	40.33	59.19	Dis	FBgn0029157	ssh
PS1141	2	2	+	10979054	10982685	16.81	21.16	14.485	16.49	29.36	26.18	23.62	19.43	Fun	FBgn0020626	Osbp
PS1142	2	2	-	10982529	10985187	19.385	23	14.74	25.55	20.465	23.33	30.865	21.535	Fun	FBgn0039252	CG11771
PS1143	2	2	-	10985685	10987424	0	5.01	0.035	37.75	42.48	28.98	68.47	36.21	Fun	FBgn0039251	Trf4-2
PS1144	2	2	-	10987905	10990451	8.42	16.82	23.74	73.575	32.945	84.945	37.085	111.785	Dis	FBgn0039250	Mink
PS1145	2	2	-	10990881	10994935	7.285	7.495	4.15	5.09	7.555	11.06	3.095	7.19	Fun	FBgn0039249	CG11168
PS1146	2	2	+	10995033	10997914	12.57	18.725	30.545	25.275	19.135	9.82	20.6	8.51	Fun	FBgn0038129	TBC1D5
PS1147	2	2	-	10998233	11003715	3.545	5.635	7.64	10.33	25.69	5.615	45.17	3.665	Fun	FBgn0003598	Su(var)3-7
PS1148	2	2	+	11004300	11006306	2.225	3.48	5.055	7.085	7.925	5.235	7.81	3.97	Fun	FBgn0038128	Ravus
PS1149	2	2	-	11005953	11009998	45.88	62.89	109.9	89.025	34.665	44.25	38	71.675	Fun	FBgn0040551	CG11686
PS1150	2	2	+	11012450	11051029	1.85	2.62	20.81	21.25	2.8	10.205	0.735	0.085	Fun	FBgn0000024	Ace
PS1151	2	2	+	11054457	11055365	0	2.22	0	7.265	0	55.485	0	117.01	Fun	FBgn0038127	CG8476
PS1152	2	2	+	11060876	11066921	4.305	7.435	3.54	4.055	0.93	1.85	0.035	0.555	Fun	FBgn0038126	CG8483
PS1153	2	2	-	11087955	11089017	0	1.15	0	6.295	0	30.7	0	66.225	Fun	FBgn0038124	CG14380
PS1154	2	2	-	11093881	11095385	0.035	1.555	0.06	10.585	0	52.73	0	82.145	Fun	FBgn0038122	CG8138
PS1155	2	2	-	11109919	11179001	1.84	2.135	1.545	1.715	20.615	0.87	16.24	0.37	Dis	FBgn0038118	timeout
PS1156	2	2	+	11118258	11144123	0.425	0.65	5.135	4.47	0.33	1.575	0	0.005	Fun	FBgn0260793	2mit
PS1157	2	2	-	11181078	11181683	0	0	0	0	0	62.51	0	0.89	Dis	FBgn0262365	CG43063
PS1158	2	2	-	11190978	11208439	0.21	0.455	1.58	0.75	10.96	0.285	6.87	0.12	Fun	FBgn0004666	sim
PS1159	2	2	+	11213489	11214330	0	2.045	0	16.66	0.105	43.855	0.06	102.625	Fun	FBgn0036090	CG8009
PS1160	2	2	-	11214483	11219161	15.31	24.665	25.34	42.51	44.13	43.445	45.465	40.96	Fun	FBgn0260962	pic
PS1161	2	2	+	11220013	11223833	24.895	34.925	43.03	44.49	137.155	25.135	149.005	10.655	Fun	FBgn0037360	CG2182
PS1162	2	2	-	11222587	11222918	0.6	1.515	1.405	3.795	0.215	0.26	0.715	0.265	Dis
PS1163	2	2	-	11223557	11225136	3.41	6.095	11.165	15.685	13.61	10.61	15.025	14.535	Fun	FBgn0037359	MED27
PS1164	2	2	+	11225837	11228059	93.365	61.095	19.105	27.765	73.45	77.205	84.9	50.085	Fun	FBgn0037358	elm
PS1165	2	2	-	11227479	11231369	30.185	37.495	41.53	39.08	39.78	30.005	35.86	19.085	Fun	FBgn0262125	Sec23
PS1166	2	2	+	11230886	11242630	5.7	8.95	13.89	15.575	34.46	19.45	42.915	23.505	Dis	FBgn0027951	MTA1-like
PS1167	2	2	-	11242635	11244109	7.54	6.715	2.88	3.5	9.025	6.425	12.115	6.64	Fun	FBgn0037356	CG12170
PS1168	2	2	+	11245429	11247515	11.25	9.325	13.99	8.71	38.45	8.03	47.2	0.755	Fun	FBgn0038115	CG7966
PS1169	2	2	-	11247252	11253105	15.86	11.66	0.085	9.17	2.45	82.265	0.51	132.965	Fun	FBgn0001217	Hsc70-2
PS1170	2	2	+	11249202	11253262	0.625	0.555	0.095	0.09	0.225	1.89	0	0.07	Fun
PS1171	2	2	-	11254306	11256577	3.17	4.135	0	0	0.23	0.16	0.31	0	Dis	FBgn0038114	CG11670
PS1172	2	2	+	11255716	11258382	0.325	0.145	0.07	0.18	11.185	1.01	13.185	0	Dis	FBgn0003450	snk
PS1173	2	2	-	11258321	11259986	1.575	1.175	0.255	0.44	0.8	3.095	0	0.195	Fun	FBgn0038113	CG11668
PS1174	2	2	-	11261436	11267023	2.75	11.17	2.02	1.285	3.575	7.385	0.085	1.975	Fun	FBgn0003308	ry
PS1175	2	2	-	11267263	11268355	3.27	5.165	4.945	5.515	16.63	11.125	27.855	3.24	Fun	FBgn0002354	l(3)87Df
PS1176	2	2	+	11272723	11273941	11.21	21.405	19.72	43.565	22.54	75.23	17.235	85.615	Fun	FBgn0283438	CG46280
PS1177	2	2	-	11277711	11337859	29.15	39.625	133.17	116.545	80.72	24.865	107.605	11.335	Fun	FBgn0020496	CtBP
PS1178	2	2	+	11329929	11341024	30.585	43.365	44.065	40.925	68.41	24.89	61.72	19.395	Fun	FBgn0038110	CG8031
PS1179	2	2	-	11338229	11339399	0.095	8.34	0.38	108.135	0.07	182.675	0	656.97	Dis	FBgn0038109	CG11656
PS1180	2	2	-	11340989	11351703	4.07	8.615	14.15	31.755	16.43	62.7	14.55	56.78	Fun	FBgn0038108	CG7518
PS1181	2	2	+	11352898	11357480	6.9	4.435	0.755	0.855	2.28	3.815	0.105	1.38	Fun	FBgn0038105	yellow-f2
PS1182	2	2	-	11357225	11360454	3.77	4.98	11.395	11.61	17.475	5.965	17.695	4.255	NA	FBgn0051342	CG31342
PS1183	2	2	+	11360541	11361627	0	1.525	0	15.64	0	45.715	0	64.07	Fun	FBgn0038102	CG14383
PS1184	2	2	-	11361199	11363016	2.075	1.86	3.72	2.66	7.935	1.31	10.65	1.455	Fun	FBgn0051342	CG31342
PS1185	2	2	-	11366634	11371516	29.515	54.795	42.565	54.235	25.95	54.425	25.155	85.92	Fun	FBgn0038100	Paip2
PS1186	2	2	-	11372449	11375025	0	0	0.065	0.095	52.245	0.29	68.19	0.165	Fun	FBgn0038099	CG7091
PS1187	2	2	+	11384368	11388490	15.73	7.605	0.27	0.155	4.45	3.715	0.19	0.09	Fun	FBgn0038098	CG7381
PS1188	2	2	+	11389779	11390699	0.325	6.625	0	60.69	0	201.72	0	412.73	Fun
PS1189	2	2	-	11390247	11392751	20.05	13.185	3.74	2.35	3.535	2.255	0.17	0.125	Fun	FBgn0038095	Cyp304a1
PS1190	2	2	-	11392976	11393995	4.435	5.695	4.085	11.41	23.575	8.845	155.655	43.49	Fun	FBgn0087021	Spc25
PS1191	2	2	+	11394881	11412625	73.36	120.015	47.345	57.05	97.285	30.525	165.545	33.13	Fun	FBgn0040493	grsm
PS1192	2	2	-	11433070	11447945	0.29	0.56	3.125	2.945	0.44	2.28	0	0.05	Fun	FBgn0038092	beat-Vb
PS1193	2	2	+	11452421	11453886	0	2.855	0	20.89	0	31.69	0	107.23	Dis	FBgn0038090	CG10909
PS1194	2	2	+	11508988	11511335	18.795	44.355	11.11	12.065	11.065	26.535	0.18	12.445	Fun	FBgn0038088	CG10126
PS1195	2	2	-	11514646	11516180	0	0	0	0	0	1.925	0	0.025	Dis
PS1196	2	2	+	11520177	11528709	0.4	0.77	6.08	4.765	0.465	2.235	0	0	Fun	FBgn0038087	beat-Va
PS1197	2	2	+	11555615	11558724	1.07	9.15	1.025	38.72	2.56	222.465	0	463.29	Fun	FBgn0051345	CG31345
PS1198	2	2	+	11620719	11629501	0.09	0.18	1.76	1.535	0.27	1.645	0	2.985	Fun	FBgn0038084	beat-Vc
PS1199	2	2	+	11637908	11638566	0	0	0	0	28.52	71.11	0	0	Fun	FBgn0030050	CG12111
PS1200	2	2	-	11644196	11644918	12.675	7.49	0.325	0.1	8.54	15.515	0.08	0.255	Fun	FBgn0030050	CG12111
PS1201	2	2	+	11655353	11665486	109.08	68.71	19.77	38.575	98.935	105.885	66.8	58.405	Dis	FBgn0002719	Men
PS1202	2	2	+	11666969	11670193	7.585	11.47	10.015	17.41	18.32	13.555	19.645	10.08	Fun	FBgn0286828	dind
PS1203	2	2	-	11670251	11675128	15.305	28.085	14.545	13.12	6.48	8.645	2.295	6.415	Fun	FBgn0038638	CG7702
PS1204	2	2	-	11675531	11677070	9.915	14.395	14.34	27.29	18.745	42.605	55.54	379.455	Fun	FBgn0051229	CG31229
PS1205	2	2	-	11677295	11678691	13.88	20.88	21.53	23.87	38.305	14.365	71.995	11.58	Fun	FBgn0044871	Gos28
PS1206	2	2	+	11678746	11681429	6.855	10.975	10.81	16.69	25.89	12.055	19.395	10.005	Fun	FBgn0261065	Cpsf73
PS1207	2	2	-	11681369	11683453	7.355	13.535	17.28	23.56	23.83	9.295	30.99	8.88	Fun	FBgn0027841	CstF64
PS1208	2	2	+	11683266	11693485	4.165	7.69	16.73	16.58	13.99	12.16	16.91	5.835	Fun	FBgn0051224	CG31224
PS1209	2	2	-	11685798	11686560	0	0	0	0	0.055	2.53	0	0.74	Dis
PS1210	2	2	-	11696770	11767852	0.125	2.415	0.71	4.245	40.635	6.825	34.085	6.595	Dis	FBgn0263974	qin
PS1211	2	2	+	11705251	11723316	0.565	0.46	4.29	3.62	0.46	2.29	0.02	1.095	Fun	FBgn0038632	CG14301
PS1212	2	2	+	11734283	11766248	4.77	4.085	4.895	4.825	3.41	16.895	2.3	16.435	Dis	FBgn0038629	CG14304
PS1213	2	2	+	11754970	11755329	0	2.23	0	13.115	0	107.795	0	2425.72	Fun	FBgn0085229	CG34200
PS1214	2	2	-	11758377	11759871	0	6.405	0.02	32.58	0.11	249.545	0.23	469.94	Fun	FBgn0038630	CG14305
PS1215	2	2	-	11768526	11769746	0	2.785	0	23.245	0	112.45	0.035	172.705	Fun	FBgn0038627	CG7694
PS1216	2	2	-	11769844	11776831	42.505	45.365	52.45	57.895	54.82	72.745	49.34	104.285	Fun	FBgn0023083	fray
PS1217	2	2	-	11780915	11782685	0.03	3.055	0.015	40.95	0.115	86.95	0.045	163.035	Fun	FBgn0027066	Eb1
PS1218	2	2	+	11800718	11802812	1.045	7.845	9.265	17.965	0.085	14.335	0	93.385	Fun
PS1219	2	2	-	11805804	11807177	0	3.06	0	13.125	0	16.215	0	24.025	Fun	FBgn0038626	CG7691
PS1220	2	2	+	11809395	11810764	0	1.465	0	9.63	0	50.47	0	122.65	Fun	FBgn0036159	CG7557
PS1221	2	2	+	11857263	11861724	0	0.02	0.905	0.265	0.19	0.04	0	0	Sil	FBgn0004652	fru
PS1222	2	2	+	11868310	11962715	11.57	7.22	24.9	10.615	4.08	9.64	0.475	2.715	Fun	FBgn0004652	fru
PS1223	2	2	+	11871403	11873192	0	4.94	0.035	29.04	0.02	227.71	0	681.84	Fun	FBgn0265935	coro
PS1224	2	2	-	11962769	11966294	10.16	4.41	0.035	0	2.01	3.415	0	0.09	Fun	FBgn0038613	Vha100-4
PS1225	2	2	-	11967499	11968489	0	0.885	0	16.935	0	12.755	0	23.705	Fun
PS1226	2	2	+	11969399	11971111	0	0.06	0.04	0	1.685	7.805	0.125	9.785	Fun	FBgn0053346	CG33346
PS1227	2	2	+	11971760	11972591	0	3.03	0	25.005	0.07	115.7	0.065	2357.57	Fun	FBgn0038978	tHMG1
PS1228	2	2	+	11974169	11981036	4.66	6.295	22.055	18.085	11.92	4.96	9.16	1.29	Fun	FBgn0051122	CG31122
PS1229	2	2	-	11980958	11982139	3.635	7.99	7.64	18.375	23.2	35.23	34.325	63.055	Fun	FBgn0038619	CG7685
PS1230	2	2	-	11982831	11984371	9.89	25.38	34.725	35.765	89.08	14.595	84.345	9.445	Fun	FBgn0264816	koko
PS1231	2	2	-	11984963	11985972	0.72	1.435	3.24	3.015	0.81	3.955	0.84	5.25	Dis
PS1232	2	2	+	11985978	11988878	2.385	3.415	3.835	10.975	10.705	30.535	11.945	38.69	Fun	FBgn0038617	Wdr37
PS1233	2	2	-	11987990	11989364	4.01	6.245	10.675	11.74	4.46	4.2	8.63	3.9	Fun	FBgn0264751	Vti1b
PS1234	2	2	+	11990290	11998513	101.14	94.34	20.1	15.315	233.395	52.895	236.615	3.895	Fun	FBgn0028670	Vha100-2
PS1235	2	2	+	12000183	12003605	0.03	0	0.01	0	147.795	0.015	5.81	0	Fun	FBgn0038611	CG14309
PS1236	2	2	+	12005116	12007917	39.61	39.97	194.155	142.065	44.63	40.745	1.755	6.415	Dis	FBgn0038610	CG7675
PS1237	2	2	+	12013048	12019262	0.455	1.015	3.43	3.61	0.335	2.12	0	0.865	Fun	FBgn0004618	gl
PS1238	2	2	-	12018998	12020361	8.91	16.01	17.63	21.9	51.8	10.295	147.245	33.99	Fun	FBgn0038609	Nup43
PS1239	2	2	+	12020877	12022725	5.97	7.33	9.925	11.67	34.135	1.28	63.095	1.63	Fun	FBgn0038608	WRNexo
PS1240	2	2	-	12022644	12026201	0	2.925	0.28	37.74	0	69.01	0.01	88.335	Fun	FBgn0038607	hmw
PS1241	2	2	+	12024073	12024448	0	0.215	0.285	5.47	0	0.385	0	3.78	Dis
PS1242	2	2	+	12026419	12060638	0.46	0.34	1.14	0.85	0.565	2.08	0.01	0.02	Fun	FBgn0038606	CG15803
PS1243	2	2	+	12063490	12075522	0.315	0.33	7.175	6.58	0.115	1.595	0	1.345	Fun	FBgn0286852	naz
PS1244	2	2	+	12079197	12090551	9.87	8.665	12.38	17.855	3.325	30.515	0.11	32.44	Fun	FBgn0038603	PKD
PS1245	2	2	+	12101910	12104619	0	0	0.03	0	0	0.355	0	0.5	Sil	FBgn0038931	CG13407
PS1246	2	2	+	12109110	12115030	0	0	0	0	0	0	0	0	Sil	FBgn0051423	Ir94c
PS1247	2	2	+	12118015	12134560	16.365	15.755	18.805	8.305	7.645	17.625	1.08	0.54	Fun	FBgn0259736	CG42390
PS1248	2	2	+	12136388	12287398	3.625	6.775	52.36	49.63	15.08	5.775	16.155	9.405	Fun	FBgn0051163	SKIP
PS1249	2	2	+	12192619	12198388	2.68	4.215	38	44.835	0.315	0.55	0.19	0.06	Fun
PS1250	2	2	+	12198745	12200866	2.875	4.1	38.805	44.545	0.265	0.48	0.285	0.13	Fun
PS1251	2	2	+	12229148	12241442	0.335	5.07	4.6	75.92	0.06	59.96	0.065	76.905	Dis	FBgn0038934	Gld2
PS1252	2	2	+	12288882	12293119	26.39	27.205	1.085	0.815	14.655	44.95	0.37	0.445	Fun	FBgn0038938	CG7084
PS1253	2	2	-	12297681	12312056	0.595	1.35	20.75	16.815	0.035	0.14	0	0	Fun	FBgn0263117	CG34377
PS1254	2	2	+	12317684	12318608	0.175	0.54	1.525	1.9	0.045	0.105	0.05	0	Dis	FBgn0038941	CG7080
PS1255	2	2	+	12319115	12320070	0	0	0	0.185	0	0.18	0	0.44	Sil	FBgn0053721	CG33721
PS1256	2	2	+	12320319	12321004	2.38	2.675	11.545	9.77	1.2	3.275	0	0.09	Fun	FBgn0038942	CG13862
PS1257	2	2	-	12321197	12322067	21.2	902.75	0.67	0.75	0.76	1.945	0	0.415	Fun	FBgn0038943	CG5391
PS1258	2	2	-	12324533	12327736	0	0.395	0	7.44	0	33.87	0	95.455	Fun	FBgn0038944	CG5388
PS1259	2	2	-	12328885	12329774	0.88	1.61	0.09	0.1	0.435	1.48	0	0.72	Dis	FBgn0038945	CG5386
PS1260	2	2	-	12338562	12342710	0.14	0.455	126.93	116.39	11.215	26.985	0	0.09	Fun	FBgn0038946	rdhB
PS1261	2	2	+	12344692	12348158	3.345	5.27	6.43	6.895	17	5.84	19.895	7.725	Fun	FBgn0037383	Sec20
PS1262	2	2	-	12344896	12346412	4.855	10.69	13.04	28.36	42.19	18.935	47.97	17.175	Fun	FBgn0037384	dgrn
PS1263	2	2	-	12348526	12349187	854.165	1155.29	1376.8	1374.6	845.18	402.505	2033.44	284.355	Fun	FBgn0086710	RpL30
PS1264	2	2	+	12350594	12353203	8.5	15.915	15.925	36.46	35.315	39.17	49.685	48.14	Fun	FBgn0037382	Hpr1
PS1265	2	2	-	12353122	12357246	8.985	15.46	4.87	16.115	1.74	98.945	0.21	176.305	Dis	FBgn0261561	CG42675
PS1266	2	2	-	12357508	12367266	0.35	0.295	0.15	0.06	0.875	3.47	0	0.005	Fun	FBgn0263353	CG11000
PS1267	2	2	-	12369692	12375007	2.46	5.505	4.985	20.275	16.94	37.02	20.585	45.995	Fun	FBgn0037379	CG10979
PS1268	2	2	-	12375800	12390915	14.485	16.395	45.19	35.71	21.64	69.02	1.985	7.64	Fun	FBgn0285925	Fas1
PS1269	2	2	-	12391565	12397667	0	0.25	0.005	1.92	0	19.005	0	27.695	Fun	FBgn0026189	promL
PS1270	2	2	-	12400023	12404108	0	1.93	0	11.15	0	92.645	0.01	152.7	Fun	FBgn0026189	promL
PS1271	2	2	+	12404644	12405588	0	1.485	0	8.13	0	57.695	0	175.305	Fun	FBgn0036502	CG7841
PS1272	2	2	+	12406658	12441967	0.335	0.47	5.675	5.355	0.385	2.79	0	0.42	Fun	FBgn0037766	Teh1
PS1273	2	2	-	12427866	12497204	2187.53	2562.33	3698.93	3479.2	1960.4	880.635	1951.64	379.79	Fun	FBgn0037751	topi
PS1274	2	2	-	12443620	12444967	0	7.085	0	25.27	0	20.65	0	33.47	Fun	FBgn0027057	CSN1b
PS1275	2	2	+	12445300	12446365	0	3.21	0	4.77	0	6.84	0	6.44	Fun	FBgn0085331	CG34302
PS1276	2	2	+	12449625	12450585	0	0	0.11	0	31.9	71.08	0	0.495	Dis	FBgn0037761	CG8534
PS1277	2	2	+	12450900	12452131	0	3.49	0	25.615	86.06	199.345	0	45.505	Fun	FBgn0037763	CG16904
PS1278	2	2	-	12456204	12457057	0	1.495	0	10.345	0	71.37	0	255.685	Fun	FBgn0039002	CG17625
PS1279	2	2	+	12459901	12465974	8.08	12.99	29.7	26.125	22.315	10.355	26.875	7.845	Fun	FBgn0037760	FBXO11
PS1280	2	2	-	12466021	12470874	0.01	2.085	0.02	9.505	0.005	88.32	0	175.805	Fun	FBgn0037759	CG8526
PS1281	2	2	+	12468500	12471914	10.92	15.47	21.575	17.315	23.39	10.595	24.3	5.85	Fun	FBgn0037758	CG9467
PS1282	2	2	+	12476634	12480351	3.89	4.35	2.93	4.61	35.58	4.665	28.175	3.94	Fun	FBgn0037755	CG12945
PS1283	2	2	-	12480258	12482220	23.785	29.93	47.515	42.115	125.035	21.675	129.915	14.67	Fun	FBgn0037756	CG8507
PS1284	2	2	+	12486569	12488041	2.04	1.145	1.74	1.185	1.41	1.655	0	0.435	Fun
PS1285	2	2	+	12494545	12498345	16.95	17.255	17.67	18.81	42.415	29.865	37.295	13.31	Fun	FBgn0037750	Whamy
PS1286	2	2	-	12498855	12501250	8.27	10.4	8.72	13.775	36.43	41.56	55.57	20.055	Fun	FBgn0037747	Naa80
PS1287	2	2	+	12501180	12502843	9.245	14.365	22.42	23.33	39.005	19.04	33.11	13.095	Fun	FBgn0024330	MED6
PS1288	2	2	-	12502750	12504988	6.625	22.105	9.99	83.34	27.005	367.815	56.85	688.105	Fun	FBgn0037746	CG8478
PS1289	2	2	+	12505609	12507731	18.31	22.32	52.4	41.2	40.96	15.14	37.73	7.785	Fun	FBgn0266720	Snap24
PS1290	2	2	-	12507257	12512241	13.905	13.32	16.485	15.95	25.605	32.92	30.07	39.23	Fun	FBgn0037743	Alg12
PS1291	2	2	+	12512674	12514088	0.82	26.745	0.73	61.97	0.27	107.245	0.53	201.37	Fun	FBgn0037742	Rpt3R
PS1292	2	2	+	12514184	12518625	2.47	2.73	4.275	3.64	13.795	2.045	20.165	0.805	Fun	FBgn0037741	CG16908
PS1293	2	2	-	12517794	12521555	12.575	21.735	28.09	38.955	63.71	28.835	46.88	18.96	Fun	FBgn0005777	PpD3
PS1294	2	2	+	12521409	12523303	7.635	12.72	76.425	59.525	29.18	8.835	51.165	7.85	Fun	FBgn0037739	CG12948
PS1295	2	2	-	12524873	12527258	0.18	3.93	0.095	21.545	1.72	131.02	0.825	253.525	Fun
PS1296	2	2	+	12525886	12529987	9.98	8.95	7.455	6.79	36.1	11.135	40.575	3.44	Fun	FBgn0000533	ea
PS1297	2	2	-	12529524	12531356	90.665	135.44	86.825	139.36	494.215	110.75	253.765	70.69	Fun	FBgn0013269	Fkbp39
PS1298	2	2	+	12532110	12537513	9.565	15.22	40.435	38.205	24.855	13.75	27.49	9.815	Fun	FBgn0038320	Cyfip
PS1299	2	2	-	12536743	12542041	4.23	6.77	11.095	16.45	6.355	24.905	1.3	55.025	Dis	FBgn0038321	CG6218
PS1300	2	2	+	12539550	12542752	1.93	2.32	5.25	4.575	6.01	2.61	6.12	1.03	Fun	FBgn0021750	SerRS-m
PS1301	2	2	-	12543663	12544960	12.7	17.475	21.975	29.63	33.36	25.265	21.565	15.385	Fun	FBgn0039557	CG12259
PS1302	2	2	+	12557028	12572360	0.065	0.02	0.32	0.24	0.12	0.485	0.09	0.265	Sil	FBgn0266418	wake
PS1303	2	2	+	12572972	12589912	2.015	3.18	14.265	11.58	2.815	3.955	0.69	3.125	Dis	FBgn0266418	wake
PS1304	2	2	-	12591405	12592842	27.235	19.825	8.76	12.545	97.115	22.355	117.75	6.89	Fun	FBgn0046114	Gclm
PS1305	2	2	-	12593075	12596397	2.475	5.92	5.7	17.045	12.46	12.275	18.215	12.525	Fun	FBgn0039003	wfs1
PS1306	2	2	+	12598023	12602287	0.22	0.445	8.7	6.79	1.565	1.045	1.21	0.79	Fun	FBgn0263986	cd
PS1307	2	2	-	12602086	12603144	2.845	0.92	46.41	34.985	5.41	14.565	0.1	0.14	Fun	FBgn0038846	CG5697
PS1308	2	2	-	12603496	12633527	2.61	3.08	2.81	8.005	47.62	68.445	35.605	45.05	Fun	FBgn0013995	Calx
PS1309	2	2	+	12612905	12614920	85.275	49.79	0.035	0	8.245	10.97	0.02	0.575	Fun	FBgn0038845	Alp5
PS1310	2	2	-	12642700	12656885	45.23	49.27	159.755	136.91	212.875	276.345	99.32	10.295	Fun	FBgn0002921	Atpalpha
PS1311	2	2	+	12642782	12645305	0.365	0.4	3.48	3.82	0.51	0.865	0.03	0.125	Fun
PS1312	2	2	-	12690032	12706332	60.51	63.435	61.305	61.705	26.895	125.08	3.895	155.085	Fun	FBgn0038842	hdly
PS1313	2	2	+	12708880	12712374	0.325	0.245	1.63	1.285	0.285	1.46	0	0.025	Dis	FBgn0051191	CG31191
PS1314	2	2	-	12712634	12718684	0.205	0.12	0	0.07	2.2	12.825	0.09	0.055	Fun	FBgn0038840	Grik
PS1315	2	2	+	12715349	12716132	0	0	0	0	2.27	0.795	0	0.075	Fun	FBgn0044809	TotZ
PS1316	2	2	-	12721126	12721817	10.24	30.83	176.37	141.095	26.63	44.89	0.26	12.535	Fun	FBgn0031701	TotM
PS1317	2	2	-	12722701	12723253	5.915	7.125	33.2	26.615	9.8	8.805	0.315	2.595	Dis	FBgn0044810	TotX
PS1318	2	2	+	12725679	12729071	1.075	1.13	7.995	6.775	3.085	13.655	0.03	0.06	Fun	FBgn0038839	Ktl
PS1319	2	2	+	12731167	12731773	2.55	13.615	1864.44	1666.47	4.14	0.1	0.735	0	Fun	FBgn0028396	TotA
PS1320	2	2	+	12755418	12762345	0.455	0.635	8.915	6.65	0.605	1.435	0	0.01	Fun	FBgn0038837	KaiR1D
PS1321	2	2	-	12765808	12766802	1882.13	2340.55	2395.33	2221.2	2047.67	662.1	3793.74	455.255	Fun	FBgn0038834	RpS30
PS1322	2	2	+	12765815	12766685	2.53	4.165	6.73	6.015	2.52	0.575	1.23	0.11	Dis
PS1323	2	2	-	12770309	12774104	0.38	0.56	0.07	4.755	0.585	14.83	3.26	20.125	Dis	FBgn0038832	CG15695
PS1324	2	2	-	12784987	12795184	20.15	24.005	37.225	38.07	80.895	104.68	69.835	135.105	Fun	FBgn0053094	Synd
PS1325	2	2	+	12795270	12796451	4518.77	5388.46	6284.03	5951.06	3363.91	1133.08	4414.77	701.295	Fun	FBgn0019936	RpS20
PS1326	2	2	-	12796424	12797401	56.98	70.685	109.655	130.21	84.8	66.79	120.16	83.67	Fun	FBgn0038830	CG17272
PS1327	2	2	-	12797601	12803206	77.245	58.625	35.965	30.265	126.39	79.29	144.92	12.91	Fun	FBgn0027493	AdSS
PS1328	2	2	+	12805120	12828444	3.95	3.655	7.805	9.195	10.11	11.695	10.18	11.105	Fun	FBgn0263782	Hmgcr
PS1329	2	2	-	12816406	12824250	0	0.445	0	2.245	0	10.835	0	23.565	Dis
PS1330	2	2	-	12828148	12830934	10.635	19.71	18.455	30.35	55.955	27.825	84.625	38.975	Fun	FBgn0039110	RanBP3
PS1331	2	2	+	12831114	12832960	128.42	196.55	104.7	125.215	173.355	114.97	114.675	118.715	Fun	FBgn0028684	Rpt5
PS1332	2	2	-	12831200	12831627	1.215	4.375	0.865	3.4	0	0.435	0.55	2.015	Dis
PS1333	2	2	-	12832752	12836087	13.805	17.465	16.015	20.295	22.325	20.445	31.08	22.075	Fun	FBgn0028475	Hrd3
PS1334	2	2	+	12835898	12837427	15.36	22.01	17.16	17.96	50.275	21.495	48.26	4.33	Fun	FBgn0039111	PTPMT1
PS1335	2	2	-	12837285	12841026	121.915	125.825	88.69	135.94	164.805	346.955	159.52	406.915	Fun	FBgn0039113	udt
PS1336	2	2	+	12841458	12843890	103.675	101.37	63.89	46.01	31.37	23.03	12.175	2.74	Fun	FBgn0039114	Lsd-1
PS1337	2	2	-	12843726	12844725	12.495	14.89	15.93	20.535	63.47	18.57	82.65	21.18	Fun	FBgn0039115	CG10214
PS1338	2	2	+	12844499	12845934	7.32	11.12	23.86	26.475	28.08	23.12	26.905	19.755	Fun	FBgn0039116	CG10375
PS1339	2	2	-	12845756	12851437	6.585	8.01	10.53	11.955	17.635	9.28	20.725	7.54	Fun	FBgn0039117	tst
PS1340	2	2	-	12851600	12858864	4.905	7.59	8.085	12.755	28.39	13.605	35.485	11.21	Fun	FBgn0039120	Nup98-96
PS1341	2	2	+	12860412	12881937	4.285	4.52	5.415	4.375	21.045	7.43	14.085	2.93	Fun	FBgn0015513	mbc
PS1342	2	2	-	12882453	12902322	18.735	30.94	70.99	71.755	25.32	142.07	24.42	109.78	Fun	FBgn0260634	eIF4G2
PS1343	2	2	+	12905787	12929469	1.13	1.235	5.41	3.855	0.73	3.055	0.03	0.14	Fun	FBgn0085384	CG34355
PS1344	2	2	+	12929883	12932554	17430.2	7486.69	1263.05	1187.58	0.37	0.27	0	0.015	Fun	FBgn0002563	Lsp1beta
PS1345	2	2	-	12929927	12934464	31.71	18.555	4.71	3.165	0.49	0.26	12.445	0.95	Fun
PS1346	2	2	-	12936541	12974815	12.555	25.73	79.45	68.64	36.375	10.355	36.315	4.18	Fun	FBgn0025574	Pli
PS1347	2	2	+	12947412	12949107	0.095	9.96	1.79	55.42	0	363.19	0.045	1111.74	Fun	FBgn0031085	CG9570
PS1348	2	2	-	12976951	12977668	74.775	97.905	117.32	123.695	145.25	84.37	137.58	58.74	Fun	FBgn0013347	TfIIA-S
PS1349	2	2	+	12980675	12991468	17.45	20.09	41.535	45.005	43.76	29.13	39.885	26.965	Fun	FBgn0285913	red
PS1350	2	2	-	12994332	12998394	5.09	9.33	12.17	13.6	31.16	8.545	44.355	6.445	Fun	FBgn0003567	su(Hw)
PS1351	2	2	+	12998022	13002624	29.315	23.73	7.215	9.755	15.9	12.885	12.77	6.335	Fun	FBgn0051321	CG31321
PS1352	2	2	+	13002779	13003847	3.345	3.21	0.455	0.655	0.76	2.17	0.05	0.15	Fun	FBgn0013767	Crz
PS1353	2	2	+	13004887	13008179	3.255	5.215	27.695	24.42	11.675	11.055	12.47	4.125	Fun	FBgn0037556	CG9636
PS1354	2	2	+	13009815	13013069	10.095	16.62	23.46	20.905	59.8	8.495	54.65	4.535	Dis	FBgn0037555	Ada2b
PS1355	2	2	-	13012364	13016126	7.1	9.645	7.605	10.72	15.97	17.235	20.67	18.88	Fun	FBgn0037554	PolI
PS1356	2	2	+	13016220	13018029	0.06	9.445	0.215	43.095	0	52.865	0	66.725	Fun	FBgn0030684	CG8260
PS1357	2	2	-	13016529	13018807	0	0.19	0.015	0.665	0	9.14	0	18.385	Fun
PS1358	2	2	-	13029901	13032324	15.175	12.565	19.865	18.445	11.625	8.005	0.225	1.345	Fun	FBgn0037553	CG18249
PS1359	2	2	+	13045754	13046506	0	0	0	0	1.2	1.655	0	0	Dis	FBgn0261290	CheA84a
PS1360	2	2	+	13069943	13106603	2.58	3.47	18.285	14.385	0.165	0.83	0.01	0.02	Fun	FBgn0001138	grn
PS1361	2	2	-	13124590	13128349	22.935	31.425	53.305	50.03	51.255	26.505	171.27	39.67	Fun	FBgn0037551	Arl8
PS1362	2	2	+	13128450	13129785	7.6	10.8	12.255	15.78	21.355	9.115	30.475	18.26	Fun	FBgn0037550	CG9667
PS1363	2	2	-	13129765	13132938	6.37	9.91	7.585	17.88	61.95	21.51	58.74	26.45	Fun	FBgn0037549	CG7878
PS1364	2	2	+	13149917	13153894	5.01	13.575	14.68	18.13	46.805	10.185	32.765	6.02	Fun	FBgn0039632	Cul5
PS1365	2	2	+	13154463	13155357	0.065	1.11	0.655	0.15	0.42	0.19	0.05	1.8	Fun	FBgn0012042	AttA
PS1366	2	2	-	13155464	13158903	1.795	2.865	5.095	8.255	14.205	5.445	21.585	4.485	Fun	FBgn0039631	Sirt7
PS1367	2	2	-	13159036	13160309	3.64	3.565	0.12	0.055	0.12	0.2	0.035	0.245	Dis	FBgn0039630	CG11843
PS1368	2	2	-	13160486	13175225	7.38	11.395	39.125	38.265	12.635	20.11	5.375	2.28	Fun	FBgn0003093	Pkc98E
PS1369	2	2	+	13175358	13177712	5.47	7.81	10.595	12.56	20.205	18.485	15.07	13.61	Fun	FBgn0039626	Slu7
PS1370	2	2	-	13177374	13177785	0.195	0.365	0.45	0.48	0.145	0.615	0	0.685	Sil-Dis
PS1371	2	2	-	13180563	13182809	5.225	8.995	8.85	10.78	24.12	5.225	32.245	3.145	NA	FBgn0027873	Cpsf100
PS1372	2	2	+	13183486	13187259	3.02	4.845	8.51	22.05	13.135	48.37	30.15	69.42	Fun	FBgn0039625	beta4GalNAcTB
PS1373	2	2	-	13187249	13190642	2.86	4.615	8.305	9	15.22	9	14.82	7.815	Fun	FBgn0039623	CG1951
PS1374	2	2	+	13196155	13226379	23.72	101.63	16.235	14.875	19.105	18.585	0.39	0.745	Fun	FBgn0039620	wat
PS1375	2	2	+	13250099	13299923	0.21	0.245	2.98	2.52	0.29	1.055	0	0.015	Fun	FBgn0039617	DIP-gamma
PS1376	2	2	-	13299848	13301871	0	0.085	0	0.045	0.025	7	0	1.83	Dis	FBgn0039616	CG11828
PS1377	2	2	+	13300617	13304538	0	0.38	0.015	1.71	0	2.46	0	3.915	Dis	FBgn0039124	tbrd-1
PS1378	2	2	+	13305363	13327288	3.03	4.045	11.325	9.045	12.435	3.835	13.465	0.915	Fun	FBgn0003862	trx
PS1379	2	2	-	13327267	13328245	0	2.24	0	17.96	0	38.825	0	113.775	Fun	FBgn0038219	CG14839
PS1380	2	2	+	13328207	13329322	0	5.225	0.095	31.845	0	83.65	0	136.4	Fun	FBgn0038218	CG14841
PS1381	2	2	+	13331366	13338977	1.815	2.03	3.995	3.845	10.29	1.685	21.08	1.535	Fun	FBgn0027083	MetRS-m
PS1382	2	2	+	13351457	13353163	0	0.87	0	4.98	0	33.735	0	98.45	Fun	FBgn0038213	CG9624
PS1383	2	2	+	13354768	13356570	10.46	12.965	4.99	4.02	4.075	7.07	0.045	1.36	Fun	FBgn0027563	CG9631
PS1384	2	2	+	13356860	13358825	3.335	2.275	0.65	0.87	1.15	2.435	0.025	0.25	Fun	FBgn0053329	Sp212
PS1385	2	2	+	13359670	13360864	0	0	0	0	25.465	68.85	0	0	Fun	FBgn0053109	CG33109
PS1386	2	2	+	13361034	13363238	0.05	0.03	0.98	0.24	2.825	3.39	0.07	0.255	Dis	FBgn0051326	CG31326
PS1387	2	2	+	13363665	13365956	1	0.4	0.39	0.25	1.91	2.82	0	0.115	Fun	FBgn0038211	CG9649
PS1388	2	2	+	13366149	13400915	0.09	0.14	1.065	0.885	0.1	0.705	0	0.135	Fun	FBgn0011582	Dop1R1
PS1389	2	2	+	13405349	13411557	0.015	5.415	0	25.01	0	249.84	0	387.62	Fun	FBgn0051533	CG31533
PS1390	2	2	-	13427145	13428490	0	1.205	0	2.405	0	4.475	0	25.025	Fun	FBgn0013347	TfIIA-S
PS1391	2	2	+	13428353	13429524	0	4.45	0.03	32.77	0	25.815	0	45.695	Fun	FBgn0013305	Nmda1
PS1392	2	2	+	13437888	13439416	3.43	3.78	0	0.12	0.96	0.85	0	0	Fun	FBgn0038207	CG14356
PS1393	2	2	-	13440085	13444407	17.02	21.785	33.16	29.115	43.875	8.49	71.285	3.155	Fun	FBgn0262955	RpII140
PS1394	2	2	+	13444386	13446150	3.765	4.61	4.305	5.935	9.82	7.035	11.145	1.925	Fun	FBgn0010340	140up
PS1395	2	2	-	13445451	13447111	17.09	24.53	42.515	51.635	22.525	41.025	27.7	54.685	Fun	FBgn0038206	twf
PS1396	2	2	+	13447167	13450270	7.985	14.775	35.22	32.915	18.71	9.375	20.275	5.37	Fun	FBgn0020510	Abi
PS1397	2	2	-	13457567	13459068	0	0	0.195	0	0.03	0.065	0	0.065	Sil	FBgn0038203	Or88a
PS1398	2	2	+	13460961	13464572	0.745	1.04	16.455	15.835	0.93	4.425	0.01	0.155	Fun	FBgn0038202	CG12402
PS1399	2	2	+	13465509	13469027	0.145	0.37	0.09	0.065	0.105	0.25	0	0	Sil	FBgn0038201	PK1-R
PS1400	2	2	+	13470908	13471854	0.06	34.635	0.245	524.975	0	1002.31	0	1227.49	Fun	FBgn0038200	CG9920
PS1401	2	2	+	13472042	13476684	0.735	0.46	0.585	0.4	0.49	1.83	0	1.34	Fun	FBgn0038199	CCHa1
PS1402	2	2	-	13476267	13477876	20.135	19.63	35.74	30.91	25.32	61.885	1.85	9.45	Fun	FBgn0038198	Npc2b
PS1403	2	2	+	13480602	13481487	0.485	1.66	0.05	0.075	0	0.395	0	1.305	Fun	FBgn0012042	AttA
PS1404	2	2	-	13481772	13519880	13.785	14.915	14.74	11.565	28.385	26.23	18.33	2.025	Fun	FBgn0038197	foxo
PS1405	2	2	+	13542206	13543900	20.44	26.585	30.415	36.255	67.47	44.025	39.57	68.76	Fun	FBgn0038196	CG9922
PS1406	2	2	-	13544080	13546507	16.225	29.72	31.45	71.5	38.06	89.53	29.66	94.105	Fun	FBgn0038195	CG3061
PS1407	2	2	+	13547117	13619237	14.48	24.86	52.565	46.465	274.8	20.605	281.865	3.345	Fun	FBgn0264493	rdx
PS1408	2	2	-	13547745	13550951	12.02	17.3	9.28	5.1	19.1	27.63	0.155	4.025	Fun	FBgn0038194	Cyp6d5
PS1409	2	2	-	13618737	13621368	1.415	2.86	1.42	3.815	21.06	3.085	60.77	6.855	Fun	FBgn0015270	Orc2
PS1410	2	2	+	13622025	13626933	0.08	1.195	0.25	1.755	48.935	3.425	86.12	2.28	Dis	FBgn0038191	CG9925
PS1411	2	2	-	13625461	13626876	6.9	9.19	9.37	10.03	28.515	15.005	23.245	4.32	Dis	FBgn0016672	Ipp
PS1412	2	2	+	13637085	13637808	0	4.05	0	9.19	0	8.815	0.07	71.845	Fun	FBgn0038190	CG9926
PS1413	2	2	+	13641547	13642943	0	5.19	0	18.675	0.03	24.235	0.03	29.975	Fun	FBgn0038189	Art6
PS1414	2	2	+	13644013	13645768	0	10.795	0.04	95.045	0	168.995	0	201.28	Fun	FBgn0038188	Art9
PS1415	2	2	-	13684052	13686797	2.735	4.56	13.54	12.51	0.115	0.45	0.015	0.155	Fun	FBgn0000576	ems
PS1416	2	2	+	13713682	13721500	1.24	2.12	6.3	6.53	0.035	5.12	0	8.05	Fun	FBgn0008646	E5
PS1417	2	2	+	13733688	13734625	0	0.825	0	5.485	0	8.66	0	14.27	Fun	FBgn0038186	CG14362
PS1418	2	2	-	13734618	13735054	0	0.215	2.54	1.35	578.13	0	0	0	Fun
PS1419	2	2	+	13753636	13768859	2.36	3.345	5.66	7.23	9.035	7.96	10.01	7.23	Dis	FBgn0015589	Apc
PS1420	2	2	-	13767168	13769428	0.11	0.125	0.305	0.4	5.34	0.435	8.885	0.955	Fun
PS1421	2	2	+	13769595	13772049	71.865	117.775	138.07	163.425	271.02	60	368.165	59.425	Fun	FBgn0003676	CCT1
PS1422	2	2	+	13772127	13773272	6.63	3.375	6.26	4.375	3.525	16.645	0.33	4.52	Fun	FBgn0038977	CG5376
PS1423	2	2	-	13772814	13773996	40.77	46.61	69.065	63.77	118.27	50.895	145.545	73.095	Fun	FBgn0038976	Pfdn5
PS1424	2	2	-	13774680	13785650	0.395	0.375	9.105	6.44	1.98	7.73	0	0.15	Fun	FBgn0038975	Nrx-1
PS1425	2	2	+	13793928	13795702	27.15	26.76	18.37	15.685	23.08	20.4	28.97	7.51	Fun	FBgn0038974	CG5377
PS1426	2	2	-	13795197	13797335	233.28	135.855	19.195	12.87	115.32	91.31	35.605	12.28	Fun	FBgn0038973	Pebp1
PS1427	2	2	-	13797703	13799967	23.16	37.015	52.04	52.185	58.035	32.34	51.6	15.835	Fun	FBgn0263351	AP-2mu
PS1428	2	2	+	13800434	13801918	135.05	190.745	103.98	126.905	168.465	86.51	118.7	76.07	Fun	FBgn0028688	Rpn7
PS1429	2	2	-	13801618	13813199	6.685	6.26	8.965	7.02	9.86	6.06	6.985	2.085	Fun	FBgn0085405	CG34376
PS1430	2	2	+	13813512	13814339	24.065	17.57	2.38	1.8	7.155	11.155	0	0.87	Fun	FBgn0085317	CG34288
PS1431	2	2	+	13814866	13821505	3.655	3.72	3.09	2.335	21.235	1.655	17.82	0.83	Fun	FBgn0038968	CG12499
PS1432	2	2	+	13835936	13837535	0.42	0.28	3.105	2.12	0.08	0.115	0	0	Dis	FBgn0038967	CG13847
PS1433	2	2	+	13838230	13840389	45.035	59.795	35.885	35.83	183.845	24.75	284.245	18.25	Fun	FBgn0038964	Nop56
PS1434	2	2	-	13839792	13841880	8.76	16.29	28.825	34.12	40.545	21.645	41.45	16.955	Fun	FBgn0038965	mats
PS1435	2	2	-	13842109	13845660	1.52	2.645	2.23	3.535	4.98	2.655	3.655	2.19	Fun	FBgn0036038	defl
PS1436	2	2	-	13848306	13856577	12.35	14.585	15.53	16.875	38.985	24.36	43.975	30.09	Fun	FBgn0261279	lqfR
PS1437	2	2	+	13855669	13858791	7.435	7.445	7.375	10.41	22.465	17.515	18.815	20.415	Fun	FBgn0038961	CG13850
PS1438	2	2	-	13858700	13861491	0	1.93	0.08	20.65	0.065	51.135	0	101.72	Fun	FBgn0038960	CG13855
PS1439	2	2	-	13862404	13864981	0.39	3.065	20.68	20.8	0.4	3.02	0	0	Fun	FBgn0038959	CG13856
PS1440	2	2	+	13873472	13875841	0.03	0.025	45.315	35.31	0	0.105	0	0.025	Fun	FBgn0038958	CG13857
PS1441	2	2	-	13875678	13878551	0.92	3.225	4.415	13.185	4.405	51.335	1.63	56.035	Fun	FBgn0038957	CG7059
PS1442	2	2	+	13879801	13881812	0.31	0.05	0.68	0.215	3.265	0.23	0	0.045	Fun	FBgn0038956	CAH8
PS1443	2	2	-	13881805	13887461	0.82	2.74	2.275	9.205	3.435	153.625	2.59	182.35	Dis	FBgn0263048	Gpdh3
PS1444	2	2	-	13887534	13893365	3.475	4.27	5.395	5.595	17.295	10.155	11.585	2.92	Dis	FBgn0038953	CG18596
PS1445	2	2	-	13893945	13900117	347.57	284.39	97.985	83.77	410.705	544.015	217.105	174.155	Fun	FBgn0267385	PyK
PS1446	2	2	+	13896221	13896736	2.19	0.665	0.51	0.62	0.165	0.195	0	0	Fun
PS1447	2	2	+	13901997	13904665	4.625	6.195	4.6	14.97	13.795	59.9	13.8	96.285	Fun	FBgn0039126	CG13601
PS1448	2	2	-	13904518	13906647	5.335	8.365	8.01	13.865	30.42	10.785	33.035	13.545	Fun	FBgn0039125	Ndc1
PS1449	2	2	+	13907800	13938201	1.115	1.885	3.615	3.3	3.84	4.09	2.465	1.3	Fun	FBgn0016754	sba
PS1450	2	2	+	13938380	13939617	0	5.705	0.085	34.765	0.035	60.24	0	115.625	Fun
PS1451	2	2	-	13939924	13979844	12.045	18.165	27.35	25.615	48.655	71.885	33.165	8.66	Dis	FBgn0265998	Doa
PS1452	2	2	+	13981768	13994422	0.135	0.095	0.865	0.665	1.31	5.425	0.15	0.33	Fun	FBgn0053203	CG33203
PS1453	2	2	-	13983936	13986580	45.45	85.785	57.45	47.815	2.68	2.555	0.035	2.12	Fun	FBgn0027578	Nepl21
PS1454	2	2	+	13987252	13991471	2.12	13.21	22.9	26.03	4.205	7.59	5.17	7.575	Fun	FBgn0039612	Nepl19
PS1455	2	2	-	13994582	14025592	1.345	2.245	6.79	5.645	16.825	3.64	15.795	0.79	Fun	FBgn0264324	spg
PS1456	2	2	+	14007912	14014130	40.085	60.15	258.545	191.87	19.565	18.88	2.725	14.125	Fun	FBgn0265274	Inx3
PS1457	2	2	+	14026756	14030127	10.435	16.41	27.645	30.11	29.96	13.4	55.525	14.5	Fun	FBgn0037583	CG9684
PS1458	2	2	-	14030700	14032541	37.455	46.935	25.005	28.68	60.805	34.145	59.46	8.445	Fun	FBgn0020249	stck
PS1459	2	2	-	14040484	14043473	10.105	13.785	25.105	20.67	48.985	10.74	53.94	3.905	Fun	FBgn0261108	Atg13
PS1460	2	2	-	14044877	14047209	1.775	3.69	8.37	26.405	27.63	49.76	68.275	154.51	Fun	FBgn0037581	CG7352
PS1461	2	2	-	14047388	14050982	62.185	78.945	50.465	61.585	114.735	116.51	97.585	135.965	Fun	FBgn0037580	DppIII
PS1462	2	2	+	14050870	14054244	14.755	21.225	17.19	39.79	26.08	51.495	23.525	52.64	Fun	FBgn0039875	sip3
PS1463	2	2	-	14053774	14056432	3.455	6.34	14.32	15.78	26.03	7.85	23.775	4.835	Fun	FBgn0039876	CG2126
PS1464	2	2	+	14056253	14071326	18.465	22.28	55.965	51.01	49.005	28.13	35.185	7.275	Fun	FBgn0005632	faf
PS1465	2	2	-	14072421	14075268	15.27	15.22	16.5	14.015	30.615	5.105	58.24	1.525	Fun	FBgn0039877	Mccc1
PS1466	2	2	+	14075995	14077610	34.14	48.35	35.79	51.97	77.015	84.715	75.86	110.255	Fun	FBgn0064126	CG33722
PS1467	2	2	-	14077572	14081289	0.015	0.03	0	0.015	0.01	16.885	0	0.57	Fun	FBgn0040528	CG15864
PS1468	2	2	+	14089958	14091738	0.705	1.555	2.66	1.665	0.195	1.165	0	0.05	Dis	FBgn0260386	mtg
PS1469	2	2	-	14091680	14094074	16.63	24.31	27.07	31.56	106.805	12.915	102.805	6.13	Fun	FBgn0010173	RpA-70
PS1470	2	2	+	14094274	14097208	9.405	10.68	5.285	6.19	53.925	1.92	56.08	1.2	Fun	FBgn0014861	Mcm2
PS1471	2	2	-	14097165	14099503	7.265	7.955	6.915	6.91	28.865	3.22	23.45	1.05	Fun	FBgn0037561	CG9630
PS1472	2	2	-	14100930	14107868	21.48	42.59	39.505	38.32	47.06	160.845	37.785	205.685	Fun	FBgn0011225	jar
PS1473	2	2	+	14124336	14126895	2.685	4.245	2.215	2.05	4.405	2.645	0.8	0.785	Fun	FBgn0086365	Orct2
PS1474	2	2	+	14127675	14130056	32.825	133.325	59.705	41.595	5.075	4.315	0.16	0.09	Fun	FBgn0019952	Orct
PS1475	2	2	+	14131626	14133331	0	1.155	0.04	11.605	0	43.09	0	132.96	Fun	FBgn0286199	shps
PS1476	2	2	+	14135999	14140443	5.895	14.26	30.095	21.16	16.835	8.725	7.675	0.49	Fun	FBgn0039178	CG6356
PS1477	2	2	-	14140347	14141647	15.45	11.33	0	0.15	0.27	1.04	0	0.97	Fun	FBgn0085319	CG34290
PS1478	2	2	+	14142497	14144591	106.02	104.925	11.65	13.78	23.33	10.67	25.375	10.23	Fun	FBgn0039427	CG5447
PS1479	2	2	-	14144423	14145831	3.22	4.035	1.14	0.82	1.22	4.965	0	0.06	Fun	FBgn0023178	Pdf
PS1480	2	2	+	14146094	14147929	284.37	158.57	0.11	0.135	0	0	0	0	Dis
PS1481	2	2	-	14148448	14155789	1.555	1.69	3.105	2.315	1.245	4.58	0.045	0.36	Fun	FBgn0038237	Pde6
PS1482	2	2	-	14193229	14194472	0.84	5.165	0.165	0.13	1.37	4.1	0	0.045	Fun	FBgn0038238	CG14854
PS1483	2	2	+	14195036	14195782	9.94	458.765	0.045	0	0	0.135	0	0	Dis	FBgn0001091	Gapdh1
PS1484	2	2	+	14196231	14197190	24.17	125.98	0.14	0.165	0	0	0	0	Dis	FBgn0004363	porin
PS1485	2	2	+	14199351	14199906	3.98	2.23	0	0	0	0	0	0	Fun	FBgn0038239	CG14850
PS1486	2	2	+	14201823	14202365	150.425	94.475	0.07	0	0	0	0	0	Fun	FBgn0038241	CG8087
PS1487	2	2	+	14203760	14204302	113.46	59.495	0.505	0.135	0	0	0	0	Fun
PS1488	2	2	-	14204343	14206867	500.035	479.49	723.565	723.44	113.145	335.035	43.625	664.905	Fun	FBgn0051313	CG31313
PS1489	2	2	-	14208535	14214185	8.73	10.115	11.02	11.975	24.055	11.17	21.495	3.18	Fun	FBgn0038244	CG7987
PS1490	2	2	+	14215387	14215835	120.555	48.73	0.095	0.18	0	0.285	0	0.145	Fun
PS1491	2	2	+	14216770	14217167	0	0.195	0	0	0	0	0	0	Sil
PS1492	2	2	-	14217191	14217529	0	0	0	0	0	323.21	0	26.16	Fun	FBgn0264903	CG44094
PS1493	2	2	+	14218223	14251166	3.985	5.31	21.235	15.385	2.175	7.83	1.005	1.15	Fun	FBgn0020299	stumps
PS1494	2	2	+	14252052	14256122	118.39	133.695	168.655	149.865	177.095	193.735	99.69	98.125	Fun	FBgn0038947	Sar1
PS1495	2	2	-	14254964	14257797	7.715	10.68	12.65	12.135	21.77	7.505	29.375	4.325	Fun	FBgn0038948	PSR
PS1496	2	2	+	14257592	14258059	0	0	0	0	0	1.925	0	0.135	Dis
PS1497	2	2	+	14258394	14260133	20.105	32.715	26.5	44.12	39.1	38.925	36.69	26.645	Fun	FBgn0260467	CG7071
PS1498	2	2	-	14260056	14266250	51.235	75.15	48.975	53.31	68.26	38.595	59.82	33.92	Fun	FBgn0015282	Rpt2
PS1499	2	2	+	14261609	14262992	20.765	26.255	33.51	34.425	43.575	21.55	113.285	25.875	Fun	FBgn0032224	Sps2
PS1500	2	2	+	14263823	14264822	5.235	7.065	8.655	8.165	7.015	7.725	3.055	10.055	Fun	FBgn0047114	CG31142
PS1501	2	2	+	14266813	14268092	3.19	6.005	10.55	18.795	14.91	15.125	26.145	21.12	Fun	FBgn0039128	CG13599
PS1502	2	2	-	14267801	14268649	0.38	19.295	1.02	43.33	0.17	38.015	0.715	328.185	Fun	FBgn0039129	RpS19b
PS1503	2	2	+	14268935	14273145	10.49	19.5	34.375	31.2	10.7	6.9	11.405	6.12	Fun	FBgn0039130	CG5854
PS1504	2	2	-	14271082	14278649	622.49	537.485	104.02	107.445	321.42	342.285	193.62	7.805	Fun	FBgn0001098	Gdh
PS1505	2	2	-	14280747	14285817	0.43	0.155	7.16	7.07	1.93	8.47	0.125	0	Fun	FBgn0039131	CG12268
PS1506	2	2	-	14290206	14296835	47.505	60.715	58.03	59.485	65.665	30.34	52.045	13.155	Fun	FBgn0005674	GluProRS
PS1507	2	2	+	14297340	14301573	26.095	41.35	78.66	70.395	84.735	40.015	66.32	22.66	Fun	FBgn0039132	AP-1sigma
PS1508	2	2	+	14302317	14326513	12.375	16.21	102.985	99.55	17.43	78.615	0.18	0.3	Fun	FBgn0051140	CG31140
PS1509	2	2	-	14327031	14328760	12.235	20.51	20.925	23.04	55.86	19.32	88.83	19.91	Fun	FBgn0039135	CG13603
PS1510	2	2	+	14328467	14331279	45.535	66.285	84.995	73.955	74.035	37.575	85.42	25.295	Fun	FBgn0039136	CG5902
PS1511	2	2	-	14330934	14335455	7.175	9.34	15.38	15.365	5.34	15.785	3.235	18.165	Fun	FBgn0039137	CG13604
PS1512	2	2	+	14336120	14336947	0.23	0.405	1.72	1.295	0.575	0.13	0.78	0.135	Dis
PS1513	2	2	+	14347498	14348914	3.48	3.31	7.395	8.645	13.5	4.375	30.07	17.22	Fun	FBgn0051184	LSm3
PS1514	2	2	-	14348848	14358375	3.665	6.015	22.43	23.25	16.645	35.055	15.245	32.355	Fun	FBgn0020647	KrT95D
PS1515	2	2	+	14386024	14389549	3.13	5.08	9.245	8.405	13.77	4.895	22.41	3.18	Fun	FBgn0039139	Mettl3
PS1516	2	2	-	14389121	14393829	7.4	11.325	8.54	23.235	26.01	88.645	30.835	140.45	Fun	FBgn0039140	Miro
PS1517	2	2	+	14392932	14405318	5.695	9.83	11.005	29.025	37.42	20.515	39.965	19.145	Fun	FBgn0039141	spas
PS1518	2	2	-	14398662	14404049	26.125	35.07	84.775	68.71	113.635	30.215	124.605	9.465	Fun	FBgn0005649	Rox8
PS1519	2	2	-	14405188	14409070	12.18	15.69	15.085	17.055	24.89	12.675	42.01	7.83	Fun	FBgn0264325	Atg6
PS1520	2	2	+	14406782	14409140	7.51	9.15	12.965	13.35	59.52	9.66	81.235	3.415	Fun	FBgn0026576	Pisd
PS1521	2	2	-	14410442	14413094	178.595	204.57	5.605	38.515	1.465	33.535	3.605	31.11	Fun	FBgn0001230	Hsp68
PS1522	2	2	+	14414173	14415205	67.99	83.055	2.945	14.92	0.715	12.36	1.695	11.14	Dis	FBgn0001230	Hsp68
PS1523	2	2	+	14415473	14416744	153.55	201.935	4.785	32.925	1.475	40.435	2.6	30.59	Dis	FBgn0001230	Hsp68
PS1524	2	2	+	14417303	14423000	6.37	10.06	15.295	20.8	28.075	16.255	35.25	9.955	Fun	FBgn0040283	SMC1
PS1525	2	2	-	14421482	14473808	19.84	23.3	70.93	71.975	31.225	39.815	26.88	47.335	Fun	FBgn0013343	Syx1A
PS1526	2	2	+	14467395	14468876	0.13	0.095	1.275	1.475	0.025	0.065	0	0.09	Fun
PS1527	2	2	+	14471267	14473110	0	4.745	0.025	23.5	0.035	71.43	0.03	112.165	Fun	FBgn0039147	CG10694
PS1528	2	2	+	14473784	14475204	0.76	0.99	2.955	3.875	5.075	4.39	5.545	4.245	Fun	FBgn0039149	CG18428
PS1529	2	2	-	14474949	14477469	8.83	11.735	9.17	14.735	18.53	14.925	24.035	13.95	Fun	FBgn0039150	CG13605
PS1530	2	2	-	14478778	14481281	57.065	37.32	12.89	9.145	6.835	10.735	0.015	0.295	Fun	FBgn0039151	CG13607
PS1531	2	2	+	14488780	14495695	2.125	1.385	2.115	1.395	0.61	0.88	0.005	0.15	Dis	FBgn0039152	Root
PS1532	2	2	-	14495410	14498006	4.85	6.015	10.08	10.665	16.175	8.43	17.9	7.52	Fun	FBgn0039153	GatB
PS1533	2	2	+	14498191	14505545	12.48	15.79	25.23	23.225	24.355	13.41	21.255	4.825	Fun	FBgn0026317	Tsc1
PS1534	2	2	+	14505824	14508353	76.06	93.055	0.39	0.075	13.55	13.585	0.245	0.495	Fun	FBgn0039154	Npc2f
PS1535	2	2	+	14508929	14515754	5.72	3.935	23.98	19.005	1.72	2.445	0.23	0.21	Fun	FBgn0039155	Kal1
PS1536	2	2	-	14514937	14517293	4.73	5.495	5.065	6.575	9.69	4.39	11.655	1.475	Fun	FBgn0051133	Slimp
PS1537	2	2	-	14517401	14520811	10.845	12.455	5.06	8.5	15.175	19.48	21.825	28.44	Fun	FBgn0015765	p38a
PS1538	2	2	+	14522566	14526921	37.02	24.905	8.77	10.375	22.025	8.08	17.92	5.17	Fun	FBgn0039156	CG6178
PS1539	2	2	-	14522607	14523339	0.31	0.41	2.37	4.45	0.81	2.055	1.165	10.93	Dis	FBgn0012036	Aldh
PS1540	2	2	-	14525875	14532497	0.82	0.865	4.06	3.64	3.165	4.75	1.57	2.16	Fun	FBgn0039157	Myo95E
PS1541	2	2	+	14533019	14535189	4.27	6.655	9.215	11.985	12.92	11.705	20.555	23.1	Fun	FBgn0039158	TBC1d7
PS1542	2	2	-	14534338	14535245	15.87	18.26	14.325	18.715	50.035	21.925	196.09	49.825	Fun	FBgn0039159	mRpS24
PS1543	2	2	+	14535239	14539398	4.5	5.69	8.16	7.48	18.77	2.365	32.915	1.575	Fun	FBgn0026598	Apc2
PS1544	2	2	-	14538905	14540624	33.795	50.045	62.835	76.01	49.04	96.125	52.155	143.205	Fun	FBgn0039160	CG5510
PS1545	2	2	+	14544143	14555333	0.065	7.11	1.105	2.25	1.335	11.305	0	10.93	Fun	FBgn0039161	CG13606
PS1546	2	2	+	14557278	14559161	9.425	11.825	13.535	17.3	43.325	11.115	46.88	8.86	Fun	FBgn0029503	mora
PS1547	2	2	-	14558655	14564750	9.055	13.785	23.755	34.66	38.305	31.635	32.52	27.61	Fun	FBgn0266282	jnj
PS1548	2	2	+	14559665	14567972	7.64	11.88	19.44	18.545	14.79	8.385	9.65	4.215	Fun	FBgn0039165	CG6204
PS1549	2	2	-	14567837	14589621	17.09	28.46	58.485	72.47	79.04	164.635	93.29	199.635	Fun	FBgn0011725	twin
PS1550	2	2	+	14589269	14591202	2.16	3.08	1.04	5.24	22.685	5.265	32.72	5.425	Fun	FBgn0026257	cav
PS1551	2	2	-	14590714	14594416	2.31	4.07	5.225	8.705	12.835	9.86	10.335	9.09	Fun	FBgn0039169	Spps
PS1552	2	2	-	14596338	14600023	4.96	6.1	10.43	10.68	12.705	4.055	13.455	7.03	Fun	FBgn0038760	MED25
PS1553	2	2	+	14596409	14597190	190.38	233.42	260.365	242.06	181.755	177.025	365.395	173.01	Fun	FBgn0039172	Spase22-23
PS1554	2	2	+	14601573	14623318	7.265	11.345	27.035	30.36	24.435	48.585	18.33	39.17	Dis	FBgn0261554	CG42672
PS1555	2	2	-	14622411	14625766	12.29	14.25	15.65	16.635	54.77	9.36	48.275	3.65	Fun	FBgn0039175	beta-PheRS
PS1556	2	2	+	14635091	14636339	1.69	3.205	0.595	0.56	0	0.15	0	0	Fun	FBgn0010433	ato
PS1557	2	2	+	14644187	14645192	1.1	6.28	0.335	21.845	1.225	87.58	2.705	535.655	Fun	FBgn0023530	CG3740
PS1558	2	2	-	14646021	14646995	211.86	186.375	0.035	0.065	21.17	59.605	0	0.16	Fun	FBgn0037563	CG11672
PS1559	2	2	+	14647524	14648569	29.12	36.52	0.095	0	2.965	10.855	0.05	0	Fun	FBgn0051464	CG31464
PS1560	2	2	+	14648643	14650026	8.085	3.66	0.05	0	3.09	4.28	0	0	Fun	FBgn0051463	CG31463
PS1561	2	2	-	14650059	14657331	1.655	2.88	1.08	3.525	1.685	6.375	1.5	4.99	Fun	FBgn0037565	CG9626
PS1562	2	2	+	14657258	14658821	13.355	15.1	14.755	19.585	42.07	27.33	26.98	15.71	Fun	FBgn0037566	mRpL1
PS1563	2	2	-	14658731	14662301	38.095	42.575	40.735	64.635	64.125	69.995	54.77	92.215	Fun	FBgn0265101	Sgt1
PS1564	2	2	+	14662371	14663051	2.275	2.69	3.575	4.58	9.65	0.375	34.035	2.14	Fun
PS1565	2	2	-	14665456	14669009	3.135	4.965	14.85	11.83	8.525	4.665	7.03	5.23	Fun	FBgn0037570	CG11693
PS1566	2	2	-	14669402	14670395	0	3.94	0	27.835	0	38.91	0	314.03	Fun	FBgn0037571	CG11694
PS1567	2	2	+	14670423	14671333	0	2.79	0.08	15.235	0.045	25.61	0	29.79	Fun	FBgn0037572	CG11698
PS1568	2	2	+	14671749	14673354	35.545	46.785	58.785	66.87	77.825	32.51	113.015	22.47	Fun	FBgn0037573	CG7483
PS1569	2	2	-	14673216	14675036	5.765	5.84	5.265	6.23	25.155	5.555	50.465	3.365	Fun	FBgn0037574	Coq2
PS1570	2	2	+	14676087	14678517	252.99	247.34	24.91	18.77	25.83	83.03	0.18	0.425	Fun	FBgn0062412	Ctr1B
PS1571	2	2	-	14677928	14691923	0.83	1.555	3.56	2.475	0.455	1.48	0.085	0.505	Fun	FBgn0003129	Poxm
PS1572	2	2	+	14681730	14682450	0.705	0.475	0.385	0.225	36.37	1.66	7.625	0.45	Dis	FBgn0037577	CG7443
PS1573	2	2	-	14699048	14700017	575.99	557.83	271.665	352.325	275.71	288.995	159.16	170.43	Fun	FBgn0040529	COX7A
PS1574	2	2	+	14700231	14701250	27.69	49.21	68.33	102.42	54.29	73.09	71.095	154.99	Fun	FBgn0004908	Arl2
PS1575	2	2	-	14700825	14703678	2.83	4.19	7.15	7.815	10.695	5.23	15.255	4.795	Fun	FBgn0037578	PNKP
PS1576	2	2	+	14703185	14704466	0.08	7.255	1.6	82.77	0	189.37	0.17	386.475	Dis
PS1577	2	2	+	14708853	14710231	0.16	0.825	41.46	31.14	0.125	0.7	0.03	0.27	Fun	FBgn0003065	CG2150
PS1578	2	2	+	14712523	14714994	6.845	3.685	0.055	0.09	2.685	7.85	0.06	0.14	Fun	FBgn0039873	Smvt
PS1579	2	2	+	14715582	14718185	3.765	0.88	0.9	0.39	5.65	9.125	0.19	0.155	Dis	FBgn0017448	CG2187
PS1580	2	2	+	14718913	14721647	4.865	3.2	0.55	0.355	2.515	4.21	0.105	0.085	Fun	FBgn0039872	salt
PS1581	2	2	-	14722303	14756207	3.66	5.765	9.645	11.77	3.565	15.535	0.13	8.335	Fun	FBgn0038652	CG7720
PS1582	2	2	-	14760781	14810265	0.07	0.26	1.59	1.51	0.26	0.86	0.01	0.045	Fun	FBgn0038653	Octalpha2R
PS1583	2	2	+	14834244	14835622	2.98	2.89	12.075	4.185	4.675	10.995	0.345	0.25	Fun	FBgn0038654	CG14298
PS1584	2	2	+	14854873	14856193	0.085	3.915	0	19.34	0.14	143.92	0	302.15	Fun	FBgn0038655	CG14297
PS1585	2	2	+	14856324	14858515	0	0	0	0.145	1.52	6.785	0	0.575	Dis	FBgn0003248	Rh2
PS1586	2	2	-	14858259	14858824	247.84	161.89	1.18	1.06	27.92	45.725	0.745	0.605	Fun	FBgn0085313	CG34284
PS1587	2	2	-	14860651	14862482	206.705	152.22	4.53	13.395	10.365	69.67	0.16	247.785	Fun	FBgn0038658	CG14292
PS1588	2	2	+	14863342	14867254	5.53	5.865	13.745	12.8	27.885	36.67	16.775	13.955	Fun	FBgn0038659	EndoA
PS1589	2	2	-	14868086	14870402	17.59	23.84	31.13	21.955	1.745	3.345	0.72	5.56	Fun	FBgn0038660	Sgsh
PS1590	2	2	+	14872509	14885121	30.565	24.15	29.205	26.195	23.51	43.09	5.33	9.595	Dis	FBgn0261113	Xrp1
PS1591	2	2	-	14885146	14886694	31.14	36.235	29.72	56.275	84.105	292.195	30.855	283.55	Fun	FBgn0038662	Mpc1
PS1592	2	2	+	14887816	14931677	2.67	3.485	26.81	23.275	6.17	31.755	0.04	1.67	Dis	FBgn0261262	CG42613
PS1593	2	2	-	14931569	14934559	4.655	8.59	16.33	19.095	10.895	9.075	10.08	5.085	Fun	FBgn0038666	Smu1
PS1594	2	2	+	14934593	14937149	5.285	5.93	8.785	7.055	24.455	3.89	67.69	2.205	Fun	FBgn0022338	dnk
PS1595	2	2	-	14936151	14937104	22.585	26.31	45.34	46.815	55.19	24.15	82.055	23.72	Fun	FBgn0261792	snRNP-U1-C
PS1596	2	2	+	14938049	14980466	2.03	3.14	13.915	10.41	6.115	3.01	7.03	1.875	Fun	FBgn0026239	gukh
PS1597	2	2	-	14980198	14981857	3.885	6.195	8.05	11.145	14.845	5.385	44.81	7.205	Fun	FBgn0038672	CG6005
PS1598	2	2	+	14982603	14987915	4.985	6.45	7.99	9.53	22.51	22.855	17.64	15.55	Fun	FBgn0039260	Smg6
PS1599	2	2	+	14988160	14989880	0.17	0.165	0.3	0.2	72.265	0.29	60.805	0.1	Fun
PS1600	2	2	-	14990702	15086848	32.24	53.91	513.395	494.85	16.07	11.815	9.445	3.36	Dis	FBgn0011224	heph
PS1601	2	2	+	14990860	15011206	0.52	0.57	10.105	8.73	0.05	0.025	0.01	0.04	Fun
PS1602	2	2	+	15029836	15079675	0.105	0.12	1.85	1.945	0	0	0	0	Fun
PS1603	2	2	-	15107278	15113168	1.615	1.6	5.08	5.985	0.22	0.3	0.205	0.875	Fun
PS1604	2	2	-	15113482	15114843	3.11	2.995	9.375	13.21	0.515	0.715	0.265	0.485	Fun
PS1605	2	2	-	15115171	15118415	1.56	2.02	4.785	5.34	0.19	0.285	0.26	0.23	Fun
PS1606	2	2	-	15146806	15148580	0.785	1.245	4.565	5.955	0.11	0.315	0.15	0.195	Dis
PS1607	2	2	+	15159797	15172537	3.445	3.38	1.905	1.605	6.09	3.08	2.545	3.575	Fun	FBgn0039886	CG2003
PS1608	2	2	+	15179729	15183705	0	5.68	0.15	18.955	0.075	23.895	0.17	35.675	Fun	FBgn0039743	Jasper
PS1609	2	2	+	15205061	15205801	0	1.785	0	11.585	0.135	72.11	0	146.18	Fun	FBgn0035782	CG14835
PS1610	2	2	+	15209700	15213643	0	1.26	0	3.53	0	3.195	0	2.54	Fun	FBgn0028887	CG3491
PS1611	2	2	+	15229317	15259288	0.025	2.985	0.84	16.855	4.95	12.835	5.67	17.65	Fun	FBgn0039887	CG2053
PS1612	2	2	+	15263276	15271363	463.44	425.005	0.345	11.965	17.225	110.475	2.875	144.915	Fun
PS1613	2	2	-	15272439	15279779	6.085	10.835	11.46	10.965	14.88	5.85	14.505	2.6	Fun	FBgn0040206	krz
PS1614	2	2	+	15279889	15282324	34.53	47.275	44.845	39.265	176.965	16.92	111.95	7.69	Fun	FBgn0002780	mod
PS1615	2	2	-	15282873	15305336	71.3	84.15	206.5	179.155	41.035	24.315	30.11	11.81	Dis	FBgn0002645	Map205
PS1616	2	2	+	15305165	15322630	12.625	12.53	26.455	27.355	24.455	54.96	30.4	104.82	Fun	FBgn0261550	CG42668
PS1617	2	2	-	15323380	15327106	5.555	7.71	14.305	12.47	31.66	11.825	32.77	5.105	Dis	FBgn0038787	CG4360
PS1618	2	2	+	15324364	15325151	0	0.085	0	0	0	7.42	0	0.2	Fun
PS1619	2	2	+	15327007	15328578	13.405	19.52	23.09	29.785	18.16	30.095	16.425	17.605	Fun	FBgn0038788	Sirt2
PS1620	2	2	+	15334439	15345365	0	0	0	0.02	0	0.015	0	0.04	Sil-Dis	FBgn0038789	Ir92a
PS1621	2	2	+	15367360	15367994	0	43.245	0	267.005	0	129.25	0	294.405	Fun	FBgn0262732	mbf1
PS1622	2	2	+	15370118	15408792	0	9.605	0	49.14	0	80.875	0	268.785	Fun	FBgn0038796	eIF3g2
PS1623	2	2	-	15378150	15386697	0.175	0.255	4.15	3.52	1.01	5.49	0	0.195	Dis	FBgn0262869	Gfrl
PS1624	2	2	-	15405351	15406678	19.895	7.46	12.265	8.01	0.285	0.785	0	0.31	Fun	FBgn0038795	CG4335
PS1625	2	2	+	15410623	15412461	0	1.01	0	6.225	0	19.64	0	34.695	Dis	FBgn0038744	CG4733
PS1626	2	2	-	15435142	15482694	0.03	0.065	0.4	0.695	0.165	0.59	0	0.08	Sil	FBgn0262869	Gfrl
PS1627	2	2	-	15495583	15497765	0	4.395	0	24.08	0	96.14	0	536.405	Fun	FBgn0038797	Dic2
PS1628	2	2	-	15500378	15504740	35.685	42.57	1.1	2.945	3.875	36.035	0.25	70.97	Fun	FBgn0038799	MFS9
PS1629	2	2	-	15524124	15543060	26.24	28.695	25.895	23.66	39.415	22.38	38.35	7.885	Fun	FBgn0016917	Stat92E
PS1630	2	2	+	15545295	15547038	3.005	3.395	10.81	9.465	18.895	3.445	22.135	1.725	Fun
PS1631	2	2	+	15548378	15549660	36.655	47.565	40.69	58.915	64.545	64.4	51.37	74.175	Fun	FBgn0026400	Noa36
PS1632	2	2	+	15563610	15568297	7.885	8.525	9.74	7.43	1.135	4.045	0	0.175	Fun	FBgn0000659	fkh
PS1633	2	2	-	15608842	15610173	23.385	29.71	31.075	56.63	47.13	46.86	39.005	41.465	Fun	FBgn0260464	CG9288
PS1634	2	2	+	15610422	15615372	109.075	102.905	91.005	66.52	111.465	70.355	116.62	109.69	Fun	FBgn0000454	Dip-B
PS1635	2	2	+	15616317	15638984	0	0	0.01	0	0.01	0.015	0.005	0.01	Sil
PS1636	2	2	-	15661859	15665680	8.27	10.63	10.255	14.54	21.705	14.595	19.325	10.28	Fun	FBgn0266464	Nsf2
PS1637	2	2	-	15667292	15669041	3.13	4.275	7.075	6.995	26.85	2.3	42.19	1.32	Fun	FBgn0037435	CG18048
PS1638	2	2	+	15669501	15670236	42.505	62.21	72.47	82.265	255.48	45.805	310.83	85.955	Fun	FBgn0261789	SmD2
PS1639	2	2	-	15670166	15672862	10.07	17.94	63.655	88.295	4.435	91.675	0	275.515	Fun	FBgn0037432	CG10298
PS1640	2	2	-	15673244	15675546	0.02	0.04	0.045	0.22	0.28	0.31	0	0.605	Sil	FBgn0037430	Osi20
PS1641	2	2	-	15676292	15681016	0	0.025	0	0	0.02	0.055	0	0.055	Sil	FBgn0037429	Osi19
PS1642	2	2	-	15683606	15684926	0	0	0.165	0	0	0	0	0	Sil	FBgn0037428	Osi18
PS1643	2	2	-	15691277	15696114	0.07	0.525	1.11	3.67	0.03	4.745	0.025	6.725	Fun	FBgn0037427	Osi17
PS1644	2	2	-	15706454	15709916	0	0	0	0.035	0	0.555	0	0.365	Sil	FBgn0051561	Osi16
PS1645	2	2	-	15710561	15711042	4.93	0.275	0	0	0	0	0	0	Fun	FBgn0286874	CG46396
PS1646	2	2	-	15711764	15713386	0	0	0.025	0	0.06	0.03	0	0	Sil	FBgn0037424	Osi15
PS1647	2	2	-	15714723	15715998	17.515	33.79	0.06	0.5	1.075	1.03	0	1.76	Fun	FBgn0040279	Osi14
PS1648	2	2	+	15715600	15716289	0	0.08	0	0.35	0	2.17	0	10.875	Dis
PS1649	2	2	-	15720863	15723726	0	0	0.61	0.305	0	0.045	0	0	Sil	FBgn0037422	Osi13
PS1650	2	2	-	15723870	15725656	0.095	0.075	0.02	0.16	0.05	0.345	0	0.23	Sil	FBgn0037421	CG15594
PS1651	2	2	+	15727998	15729391	348.735	126.63	2.79	1.855	0.17	0.745	0	0	Fun
PS1652	2	2	-	15730030	15733731	0	0	24.015	15.065	0	0.125	0	0.185	Fun	FBgn0037419	Osi12
PS1653	2	2	+	15742977	15744081	0	0	0.77	0.545	0	0	0	0	Sil	FBgn0037418	Osi11
PS1654	2	2	-	15744122	15745466	0	0	0.07	0.04	0	0	0	0	Sil-Dis	FBgn0286977	Osi10b
PS1655	2	2	-	15745702	15747026	0	0	0	0	0	0	0	0	Sil	FBgn0286976	Osi10a
PS1656	2	2	-	15748354	15751894	1.575	2.75	12.21	4.315	0.12	0.39	0.015	0	Fun	FBgn0037416	Osi9
PS1657	2	2	-	15755533	15756251	0	0	1.26	1.975	0	0.23	0	0.255	Fun	FBgn0037415	Osi8
PS1658	2	2	-	15760199	15763496	0	0.03	0.7	0.33	0.03	0.075	0	0.015	Sil	FBgn0037414	Osi7
PS1659	2	2	-	15772623	15777701	0	0	0.22	0.13	0.015	0	0	0	Sil	FBgn0027527	Osi6
PS1660	2	2	-	15782690	15784261	0	0	0	0.055	0	0.035	0	0	Sil	FBgn0037413	Osi5
PS1661	2	2	-	15792681	15794578	0	0	5.8	3.27	0.025	0.08	0	0	Fun	FBgn0037411	Osi3
PS1662	2	2	-	15796752	15797935	0.52	0.375	1.595	1.285	0	0.4	0	0.05	Dis	FBgn0037410	Osi2
PS1663	2	2	-	15803332	15811111	0.325	0.345	0.52	0.285	0.22	0.945	0.04	0.695	Sil	FBgn0037409	Osi24
PS1664	2	2	-	15822967	15824428	55.525	47.815	0.105	0.04	34.18	103.655	0.885	0.83	Fun	FBgn0053301	CG33301
PS1665	2	2	-	15831872	15834558	0	0	0.115	0.02	28.46	0.03	0.58	0.015	Fun	FBgn0037405	CG1077
PS1666	2	2	+	15836039	15841774	0	0.06	7.725	3.755	0.675	0.045	0	0	Fun	FBgn0051559	CG31559
PS1667	2	2	-	15866594	15868156	0	1.855	0.06	11.915	0	36.305	0	33.55	Fun	FBgn0262512	Vha14-1
PS1668	2	2	+	15877188	15877977	54.05	27.355	29.975	28.91	4.13	27.925	0	0.575	Fun	FBgn0046875	Obp83g
PS1669	2	2	+	15878109	15879039	9.57	36.17	87.82	63.515	1.5	1.12	0	0.115	Fun	FBgn0046876	Obp83ef
PS1670	2	2	+	15886569	15894782	141.45	152.725	57.065	54.805	2.61	19.805	0.165	1.645	Fun	FBgn0026077	Gasp
PS1671	2	2	+	15908678	15909638	0	0	0	1.09	0	3.18	0	12.605	Fun	FBgn0037399	Or83c
PS1672	2	2	+	15925258	15927881	0	1.335	0	8.765	0	25.975	0	30.21	Dis	FBgn0035262	CG18171
PS1673	2	2	+	15956249	15957403	0.1	0.055	0.18	0.105	2.69	0.045	2.675	0.045	Fun	FBgn0037395	CG10280
PS1674	2	2	-	15957389	15958565	23.81	34.585	61.775	60.65	136.78	28.9	205.82	87.97	Fun	FBgn0261791	SNRPG
PS1675	2	2	+	15958944	15966578	148.43	156.2	239.615	227.09	372.345	131.055	380.305	121.21	Fun	FBgn0003261	Rm62
PS1676	2	2	-	15977106	15978130	0	2.435	0.07	20.99	0	19.77	0	35.27	Fun	FBgn0082598	akirin
PS1677	2	2	+	15991844	15992512	0	0	0	0	10.125	34.78	0	0.21	Fun	FBgn0010403	Obp83b
PS1678	2	2	+	15993184	15995772	0	0	0	0	9.24	36.885	0	0.61	Fun	FBgn0011281	Obp83a
PS1679	2	2	+	16005594	16006694	0	3.645	0	33.775	0	94.645	0	193.75	Fun
PS1680	2	2	+	16081843	16095500	0.245	0.365	2.485	2.67	0.465	3.05	0	1.33	Fun	FBgn0083949	side-III
PS1681	2	2	+	16095885	16099697	12.15	13.37	8.655	9.94	16.55	32.57	13.885	15.945	Fun	FBgn0037391	CG2017
PS1682	2	2	-	16099686	16101230	6.175	7.365	7.675	11.265	18.3	25.38	12.295	35.435	Fun	FBgn0028436	ECSIT
PS1683	2	2	+	16101430	16107551	3.42	4.535	14.775	13.825	12.675	6.345	15.465	3.625	Fun	FBgn0029088	disp
PS1684	2	2	-	16103110	16104150	0	1.13	0	5.305	0	54.1	0	262.28	Fun	FBgn0037388	CG14676
PS1685	2	2	-	16107553	16110317	47.67	26.76	1.56	2.52	31.53	55.66	0.435	2.205	Fun	FBgn0030332	CG9360
PS1686	2	2	-	16113112	16118155	2.63	2.815	5.725	6.945	43.725	94.51	0.52	6.215	Fun	FBgn0037387	CG1213
PS1687	2	2	-	16119922	16123155	0.95	3.58	2.235	15.265	8.17	69.615	0.255	117.095	Fun	FBgn0037386	CG1208
PS1688	2	2	-	16130672	16142715	0.645	1.285	11.775	10.825	0.685	3.865	0.025	0.625	Fun	FBgn0039883	RhoGAP100F
PS1689	2	2	+	16156911	16175285	0	0.69	0.025	2.015	0.01	2.82	0	2.565	Dis	FBgn0005616	msl-2
PS1690	2	2	-	16172119	16173210	0	0.09	0	0.43	0	1.885	0	4.81	Fun
PS1691	2	2	+	16175450	16177820	17.97	17.165	21.16	23.365	26.46	17.06	48.855	17.05	Fun	FBgn0039882	Rift
PS1692	2	2	-	16181852	16183015	0	8.195	0.06	34.355	0.11	240.985	0.24	568.53	Fun	FBgn0039881	CG1971
PS1693	2	2	+	16183753	16189836	0.86	1.485	4.685	4.32	7.285	2.775	6.145	2.4	Fun	FBgn0250755	CG42233
PS1694	2	2	-	16186330	16188463	0.045	0.51	0.055	2.63	0.02	5.235	0	6.33	Fun	FBgn0039879	Ir100a
PS1695	2	2	-	16189129	16195748	2.495	5.425	6.65	14.285	27.195	11.785	44.855	7.795	Fun	FBgn0027620	Acf
PS1696	2	2	+	16196351	16200867	4.025	7.15	16.73	17.53	35.995	7.875	45.07	5.105	Fun	FBgn0011474	PR-Set7
PS1697	2	2	-	16200431	16207663	2.28	3.575	5.71	6.61	20.61	17.035	18.145	17.745	Dis	FBgn0038223	Afti
PS1698	2	2	+	16206237	16207666	296.44	265.065	134.045	157.08	387.02	769.47	176.135	205.505	Fun	FBgn0003480	spn-B
PS1699	2	2	-	16209177	16255254	5.285	16.975	14.71	77.595	15.15	68.335	15.24	68.325	Fun	FBgn0051320	HEATR2
PS1700	2	2	-	16267450	16268146	0	7.285	0.1	42.725	0	183.08	0	350.885	Fun	FBgn0038225	soti
PS1701	2	2	-	16278393	16371041	4.995	8.85	22.825	20.415	3.19	8.48	2.425	3.19	Fun	FBgn0285955	cv-c
PS1702	2	2	+	16305413	16309517	0.34	0.545	5.88	5.605	0.215	0.84	0	0	Fun	FBgn0085417	natalisin
PS1703	2	2	+	16327827	16329030	0	0	0	0.59	0	4.81	0	15.265	Fun
PS1704	2	2	+	16352912	16353578	24.05	46.645	56.07	61.66	2.645	2.54	0	0.18	Fun
PS1705	2	2	-	16404077	16406172	6.02	10.135	5.665	16.42	9.15	21.205	14.755	26.41	Fun	FBgn0038233	HtrA2
PS1706	2	2	+	16407100	16409471	0.05	0.06	0.155	0.345	0.085	0.595	0	0.13	Sil	FBgn0038929	CG13408
PS1707	2	2	-	16409489	16459332	36.065	53.055	129.34	118.1	26.88	25.87	18.67	5.08	Fun	FBgn0264491	how
PS1708	2	2	+	16461124	16470786	13.35	19.945	19.295	24.6	31.66	21.85	43.935	19.19	Fun	FBgn0038927	CG6015
PS1709	2	2	-	16463348	16468316	5.39	6.815	5.745	6.06	39.33	4.43	34.6	2.095	Dis	FBgn0030855	CG5800
PS1710	2	2	-	16471150	16473473	0.75	0.825	7.035	5.375	0.94	2.06	0.065	0.08	Fun	FBgn0038926	CG13409
PS1711	2	2	-	16473651	16475441	96.405	97.2	51.51	64.695	143.345	211.465	90.72	34.6	Fun	FBgn0019957	ND-42
PS1712	2	2	+	16475383	16476953	19.3	19.59	25.235	32.545	35.255	91.02	44.46	94.66	Fun	FBgn0038925	Cchl
PS1713	2	2	+	16477596	16480721	13.355	22.735	26.42	24.08	15.275	3.69	22.305	2.4	Fun	FBgn0019972	Drice
PS1714	2	2	-	16479304	16481088	119.75	92.75	75.81	68.02	125.775	71.515	120.065	14.82	Fun	FBgn0039697	CG7834
PS1715	2	2	+	16481126	16482567	32.26	40.395	31.51	34.025	66.33	28.365	71.425	29.085	Fun	FBgn0039698	CG7789
PS1716	2	2	-	16481218	16485196	3.885	6.565	3.705	15.565	22.24	18.205	31.14	22.205	Fun	FBgn0002924	ncd
PS1717	2	2	+	16484974	16493827	5.47	7.825	7.215	11.145	20.23	9.02	20.275	4.515	Fun	FBgn0000247	ca
PS1718	2	2	-	16493373	16495293	4.58	6.505	9.27	7.915	14.725	3.3	24.16	1.275	Fun	FBgn0039702	Vps16B
PS1719	2	2	+	16495313	16496111	8.04	10.91	18.825	21.445	44.5	24.485	75.945	73.145	Fun	FBgn0031043	Naa20A
PS1720	2	2	-	16496074	16498448	2.83	4.835	9.325	11.685	21.625	7.26	21.995	5.26	Fun	FBgn0032763	CG17568
PS1721	2	2	-	16498745	16502118	4.115	6.55	10.015	13.19	25.86	10.085	29.38	7.66	Fun	FBgn0001990	wek
PS1722	2	2	+	16501911	16503999	5.675	7.315	13.42	11.81	45.89	4.815	46.84	2.095	Fun	FBgn0032620	CG12288
PS1723	2	2	-	16503539	16509354	4.16	10.475	8.545	36.57	30.825	89.385	34.88	212.42	Fun	FBgn0039705	Atg16
PS1724	2	2	+	16509433	16511973	6.64	10.315	4.705	20.76	13.09	76.29	14.175	144.44	Fun	FBgn0037611	CG11755
PS1725	2	2	-	16511298	16514960	84.735	85.69	64.91	82.435	67.47	77.635	67.135	58.045	Fun	FBgn0037298	Sccpdh1
PS1726	2	2	+	16512599	16513040	2.625	0.21	1.015	0.465	0	0	0.165	0.405	Dis
PS1727	2	2	+	16514882	16519641	24.08	39.45	148.45	137.22	165.555	36.825	167.03	29.19	Fun	FBgn0038476	kuk
PS1728	2	2	-	16517631	16517978	0	0	3.07	1.86	0.79	0	0.24	0	Dis
PS1729	2	2	+	16520959	16524537	1.36	1.845	1.68	3.47	78.805	2.34	107.175	2.935	Fun	FBgn0260399	gwl
PS1730	2	2	-	16524238	16533519	4.985	6.275	6.865	5.395	6.345	2.685	4.605	1.185	Fun	FBgn0038651	Epg5
PS1731	2	2	-	16534963	16539517	21.31	29.065	40.385	53.535	29.855	35.21	26.355	23.445	Fun	FBgn0022349	CG1910
PS1732	2	2	+	16536824	16537320	0.17	0.32	0.935	1.955	0.39	0	0	0.44	Dis
PS1733	2	2	+	16539172	16542530	936.155	1018.56	1027.83	902.95	1756.6	199.705	4444.7	209.32	Fun	FBgn0000150	awd
PS1734	2	2	-	16541521	16543872	10.97	17.365	18.75	24.655	31.425	13.735	35.43	22.665	Fun	FBgn0039869	CG1890
PS1735	2	2	-	16543937	16549010	13.875	24.48	392.535	293.405	27.47	157.01	0.175	5.095	Fun	FBgn0000557	eEF1alpha2
PS1736	2	2	+	16543988	16545547	0.06	0.06	3.09	1.71	0	0.115	0	0.03	Fun
PS1737	2	2	-	16549048	16550197	15.075	18.75	17.325	17.69	84.305	10.115	74.235	4.865	Fun	FBgn0039868	CG11563
PS1738	2	2	+	16550941	16553404	6.64	9.665	12.6	15.845	21.375	5.75	20.145	2.785	Fun	FBgn0039867	CstF50
PS1739	2	2	-	16552628	16564790	8.595	11.02	71.77	61.05	20.485	9.56	12.76	3.285	Fun	FBgn0003870	ttk
PS1740	2	2	+	16583011	16589455	0.115	5.145	0.06	33.585	0.095	136.435	0.015	226.91	Fun	FBgn0034464	CG11018
PS1741	2	2	-	16591346	16600297	0	0	0	0.06	0.9	0	0.095	0.065	Sil
PS1742	2	2	+	16617164	16621740	0.435	0.87	6.11	4.945	3.565	2.24	0.03	1.315	Fun	FBgn0039864	CG11550
PS1743	2	2	-	16621145	16629644	2.955	3.91	7.915	5.945	13.025	6.505	6.915	1.57	Fun	FBgn0039863	CG1815
PS1744	2	2	-	16634195	16680280	0.225	0.32	3.165	2.33	0.985	3.995	0.005	0.085	Fun	FBgn0039862	kek6
PS1745	2	2	-	16681729	16684351	2.605	4.455	8.125	9.21	16.78	9.045	25.765	5.395	Dis	FBgn0039861	pasha
PS1746	2	2	-	16687806	16689545	31.055	24.255	5.23	8.71	0	0.51	0	0.92	Fun	FBgn0038151	yellow-e2
PS1747	2	2	-	16692348	16697208	73.6	65.37	1.01	0.605	2.545	3.585	0	0	Fun	FBgn0041711	yellow-e
PS1748	2	2	-	16705270	16706099	0.41	0.585	0	3.42	0	3.855	0	7.99	Fun
PS1749	2	2	+	16707772	16709551	1634.95	1080.91	59.1	36.805	204.525	727.895	7.46	202.485	Fun	FBgn0000046	Act87E
PS1750	2	2	-	16707875	16709606	1.46	1.04	0.17	0.09	0.12	0.025	0	0.35	Fun
PS1751	2	2	-	16710138	16716311	4.02	5.835	16.01	13.42	18.38	7.815	19.98	3.875	Fun	FBgn0004049	yrt
PS1752	2	2	+	16727758	16729267	0	0.835	0	3.935	0.03	24.395	0	75.935	Fun	FBgn0038208	CG14355
PS1753	2	2	+	16733618	16745720	1.3	1.745	10.12	7.825	0.9	4.155	0.09	1.155	Fun	FBgn0038156	side-IV
PS1754	2	2	+	16756711	16806012	0	0	0.005	0	0	0.155	0	0.15	Sil	FBgn0004404	RpS14b
PS1755	2	2	-	16816789	16820175	0	0	0	0	0	0	0	0	Sil
PS1756	2	2	-	16821982	16823276	2.035	3.06	12.515	10.575	0	0	0.045	0	Fun	FBgn0051337	CG31337
PS1757	2	2	+	16833232	16833930	0	0	0	0.805	0	2.695	0	14.745	Dis
PS1758	2	2	+	16847506	16865169	0	0	0	0	0	0	0	0.01	Sil
PS1759	2	2	-	16865788	16866516	0.155	0	0	0	0.64	1.945	0.215	0.075	Fun	FBgn0038159	CG14369
PS1760	2	2	-	16878893	16879362	69.23	76.22	0.18	0.385	0	0	0	0	Fun
PS1761	2	2	-	16880173	16880547	3.45	0.96	0	0	0	0	0	0.225	Dis	FBgn0038160	CG9759
PS1762	2	2	-	16883437	16884116	633.585	390.445	0.165	0	2.465	3.35	0	0	Fun
PS1763	2	2	+	16888991	16889619	15.57	8.845	6.24	5.715	0.075	0.17	0	0.085	Fun	FBgn0038161	CG9269
PS1764	2	2	-	16898752	16899925	0	0.295	0	0.685	0	3.34	0	6.42	Fun
PS1765	2	2	+	16906509	16909506	0	1.63	0.12	11.565	0.03	117.685	0	192.425	Fun	FBgn0038163	CG10841
PS1766	2	2	-	16909500	16920405	49.37	53.795	88.89	74.33	142.235	28.17	152.22	12.925	Fun	FBgn0263396	sqd
PS1767	2	2	+	16921724	16932622	32.585	54.63	113.195	145.52	198.475	160.205	115.99	150.1	Fun	FBgn0015778	rin
PS1768	2	2	-	16930740	16932817	0.265	12.48	1.49	53.145	2.18	169.405	3.92	344.995	Fun	FBgn0010258	Rbp4
PS1769	2	2	-	16932897	16936657	38.215	64.63	95.71	80.695	78.38	28.115	58.62	11.94	Fun	FBgn0004237	Hrb87F
PS1770	2	2	+	16937476	16943049	54.865	89.155	139.635	143.87	175.21	60.67	320.115	41.255	Fun	FBgn0004587	B52
PS1771	2	2	-	16938816	16941212	0	0.075	0.09	0.745	0.045	4.085	0.015	8.535	Fun
PS1772	2	2	-	16944068	16951391	0.7	0.565	5.285	5.28	0.535	2.44	0	0.045	Fun	FBgn0038165	Task6
PS1773	2	2	-	16951591	16953552	11.85	22.5	8.875	21.775	15.03	19.185	12.24	22.125	Fun	FBgn0038166	CG9588
PS1774	2	2	+	16953557	16956790	6.51	10.9	11.77	27.08	34.575	45.23	30.18	49.99	Fun	FBgn0038167	Lkb1
PS1775	2	2	-	16956561	16960606	3.13	5.005	6.69	9.615	11.205	5.975	10.725	2.975	Fun	FBgn0038168	omd
PS1776	2	2	+	16967737	16982612	12.35	14.575	11.385	16.195	26.895	18.38	0.735	20.025	Fun	FBgn0037534	ELOVL
PS1777	2	2	+	16985337	16986239	0.07	0.14	0.04	0.145	0.16	173.39	0.175	7.27	Fun	FBgn0259974	Sfp84E
PS1778	2	2	-	16986103	16986978	0.475	1.105	3.04	4.08	14.17	33.65	0.35	1.2	Fun	FBgn0010401	Os-C
PS1779	2	2	+	16987215	16991740	43.08	56.855	47.575	42.87	110.845	28.08	170.285	15.17	Fun	FBgn0037533	CD98hc
PS1780	2	2	+	16998449	17046963	1.46	1.025	5.07	2.24	3.655	6.82	0.855	1.205	Fun	FBgn0000504	dsx
PS1781	2	2	-	17046527	17050989	3.84	5.3	6.66	6.16	50.38	3.185	53.31	2.555	Fun	FBgn0002542	lds
PS1782	2	2	+	17051085	17055870	1.995	3.495	3.915	6.855	6.94	5.395	8.485	10.375	Fun	FBgn0037531	CG10445
PS1783	2	2	-	17055961	17061745	212.37	215.845	219.495	200.41	421.095	211.1	322.61	177.25	Fun	FBgn0037607	CG8036
PS1784	2	2	+	17056553	17062515	0.05	0.065	0.08	0.115	0.005	1.825	0.005	0.16	Fun
PS1785	2	2	-	17061808	17065661	3.22	3.585	4.475	5.83	20.525	6.575	24.535	2.76	Fun	FBgn0037606	CG8032
PS1786	2	2	+	17069991	17073256	17.7	15.115	2.945	2.205	2.355	4.33	0.46	0.205	Fun	FBgn0015011	AhcyL2
PS1787	2	2	+	17075739	17077297	0	0.035	0.02	0	3.68	0	11.9	0	Fun
PS1788	2	2	-	17079732	17085280	0	0	0	0	0	0	0	0	Sil
PS1789	2	2	+	17091981	17096523	0	0	0.01	0	0.155	0.28	0.055	0	Sil
PS1790	2	2	-	17096539	17103660	0.01	0.01	0	0.045	0.045	0.17	0.015	0.055	Sil
PS1791	2	2	+	17104214	17104774	1.465	1.06	7.905	9.83	0	1.065	0	2.165	Fun	FBgn0053910	His2B:CG33910
PS1792	2	2	+	17210524	17221412	31.245	39.785	62.54	56.86	100.465	63.245	70.6	62.985	Fun	FBgn0086679	p
PS1793	2	2	-	17220467	17223530	4.36	5.01	8.55	7.74	10.895	4.28	14.265	5.37	Fun	FBgn0037603	CG11753
PS1794	2	2	+	17221771	17222315	6.875	4.845	0	0	1.315	0.81	0	0.43	Fun	FBgn0259992	CG42489
PS1795	2	2	+	17223086	17224603	19.725	28.18	33.12	52.02	50.735	44.73	71.06	96.225	Dis	FBgn0000447	Dhod
PS1796	2	2	-	17224468	17224884	38.265	40.92	31.505	37.44	67.14	38.875	101.36	27.78	Fun	FBgn0037602	SLIRP2
PS1797	2	2	+	17224913	17229600	10.46	13.45	19.27	16.485	35.795	9.695	52.335	3.73	Fun	FBgn0024326	Mkk4
PS1798	2	2	+	17230081	17240891	0.345	0.405	0.54	0.285	0.125	0.325	0	0.025	Sil	FBgn0037601	Cyp313b1
PS1799	2	2	-	17245756	17276450	0.035	0.03	0.335	0.385	0.075	0.43	0	0.02	Sil-Dis	FBgn0261929	5-HT2B
PS1800	2	2	-	17296602	17301459	4.98	8.57	15.38	23.1	30.95	23.71	45.53	28.965	Fun	FBgn0266916	Cenp-C
PS1801	2	2	+	17301284	17303972	2.175	5.635	4.77	7.66	14.57	8.015	26.155	17.925	Fun	FBgn0037347	SecS
PS1802	2	2	-	17304191	17308678	1.735	3.415	3.135	10.03	7.725	17.41	9.655	18.835	Fun	FBgn0261004	asl
PS1803	2	2	-	17309184	17314188	18.63	28.14	38.64	35.08	56.58	19.205	28.355	9.01	Fun	FBgn0017550	Rga
PS1804	2	2	+	17314179	17317080	8.88	13.095	15.62	19.06	27.535	10.43	46.235	8.47	Fun	FBgn0019637	Atu
PS1805	2	2	-	17317618	17325672	9.205	15.835	34.615	32.32	42.09	15.405	49.4	19.29	Fun	FBgn0037350	Dph4
PS1806	2	2	+	17325721	17326435	55.01	72.61	65.47	66.9	36.525	44.22	45.015	39.45	Dis
PS1807	2	2	-	17325745	17334195	4.68	9.555	8.49	10.5	6.08	12.54	13.99	27.555	Dis	FBgn0025637	SkpA
PS1808	2	2	+	17326499	17328101	2314.68	2731.18	2823.56	2757.59	2627.35	681.57	2718.62	297.13	Fun	FBgn0037351	RpL13A
PS1809	2	2	+	17328611	17329569	76.835	76.585	91.005	89.43	187.165	32.185	285.625	26.805	Fun	FBgn0051549	CG31549
PS1810	2	2	+	17330184	17331596	20.055	16.02	6.435	5.725	21.615	15.575	8.495	0.955	Fun	FBgn0037354	CG12171
PS1811	2	2	-	17331509	17332682	24.905	23.16	18.225	17.425	35.705	18.29	47.59	6.395	Fun	FBgn0051548	CG31548
PS1812	2	2	+	17332727	17337601	6.245	7.705	14.59	12.895	25.195	6.795	31.63	2.92	Fun	FBgn0046222	Wdr33
PS1813	2	2	-	17336859	17337080	1.965	0.98	6.47	1.16	0	0.765	0	0	Dis
PS1814	2	2	-	17339082	17343022	4.7	5	12.81	10.495	17.885	23.01	11.91	17.4	Fun	FBgn0010772	Xe7
PS1815	2	2	+	17343651	17353403	6.33	8.245	8.035	8.565	22.07	12.855	21.295	6.345	Fun	FBgn0037363	Atg17
PS1816	2	2	-	17352858	17359547	1.86	3.185	41.535	31.545	7.455	2.725	10.225	1.575	Fun	FBgn0037364	Rab23
PS1817	2	2	+	17360054	17386718	3.12	3.85	6.74	7.265	10.89	17.74	19.06	4.755	Fun	FBgn0261261	plx
PS1818	2	2	-	17364381	17365860	0	1.7	0	15.2	0	37.205	0.025	86.085	Fun	FBgn0037365	CG2104
PS1819	2	2	-	17386894	17395956	0.095	0.085	0.045	0	0.195	0.02	0.185	0	Sil	FBgn0004878	cas
PS1820	2	2	+	17405665	17407486	4.01	6.39	9.89	12.07	36.695	7.06	47.01	7.865	Fun	FBgn0037368	CG1239
PS1821	2	2	-	17406977	17409155	8.27	14.975	13.075	60.37	28.835	45.275	26.225	61.13	Fun	FBgn0037369	CG2100
PS1822	2	2	+	17409005	17410565	33.05	40.025	72.135	66.2	25.75	12.98	20.6	8.15	Fun	FBgn0037370	CG1236
PS1823	2	2	-	17410463	17414432	4.02	6.555	7.595	10.685	13.775	10.32	20.205	9.045	Fun	FBgn0037371	Sym
PS1824	2	2	+	17414502	17418732	7.02	8.615	13.345	11.105	16.995	6.88	15.245	3.19	Fun	FBgn0027497	Madm
PS1825	2	2	-	17417353	17420148	11.49	16.685	29.29	28.195	37.135	8.395	34.7	3.62	Fun	FBgn0037372	CG2091
PS1826	2	2	-	17421216	17446795	12.19	28.55	218.16	253.18	36.335	116.475	32.37	163.1	Fun	FBgn0266672	Sec8
PS1827	2	2	+	17444951	17447050	34.895	36.315	22.43	25.06	54.205	44.815	77.94	17.615	Fun	FBgn0037374	jagn
PS1828	2	2	+	17447589	17453492	0.595	3.785	7.425	17.305	0.39	99.795	0	172.035	Fun	FBgn0037375	kat-60L1
PS1829	2	2	-	17453379	17455209	17.35	29.985	32.35	64.3	69.41	43.1	58.495	38.75	Fun	FBgn0037376	Hat1
PS1830	2	2	+	17455135	17458952	60.115	89.735	54.095	62.22	93.24	40.86	72.15	27.045	Fun	FBgn0028690	Rpn5
PS1831	2	2	-	17455984	17456204	2	1.86	5.655	0.905	0	0.7	0	0	Fun
PS1832	2	2	-	17458834	17459884	36.74	62.385	33.91	71.71	59.025	139.69	79.33	224.52	Fun	FBgn0037378	PSMG1
PS1833	2	2	+	17459847	17461270	27.46	56.91	115.96	192.645	192.715	106.1	164.05	98.975	Fun	FBgn0038453	Arl6IP1
PS1834	2	2	-	17460434	17466998	3.59	4.17	8.32	9.22	11.87	7.3	8.97	4.53	Fun	FBgn0038454	CG10324
PS1835	2	2	+	17463182	17465609	71.87	100.43	121.065	125.68	282.185	61.67	309.46	66.285	Fun	FBgn0015019	CCT3
PS1836	2	2	+	17467426	17470119	1.11	1.71	7.79	5.83	21.465	2.57	23.99	2.175	Fun	FBgn0038452	CG14905
PS1837	2	2	-	17469916	17473307	13.09	11.505	16.42	13.64	12.395	8.955	9.335	7.04	Fun	FBgn0051217	modSP
PS1838	2	2	-	17475647	17554298	2.33	3.35	10.285	7.555	0.885	1.57	0.01	0.88	Fun	FBgn0003944	Ubx
PS1839	2	2	-	17571579	17572191	0	2.335	0	14.825	0	91.06	0	278.39	Fun	FBgn0063261	CG31275
PS1840	2	2	+	17605816	17607966	0	1.3	0.015	9.12	0	39.415	0	70.225	Fun	FBgn0015230	Glut3
PS1841	2	2	-	17629692	17653025	7.545	15.06	20.11	15.705	1.42	3.73	0.405	3.08	Fun	FBgn0000014	abd-A
PS1842	2	2	+	17653403	17654056	1.2	2.985	5.265	3.06	9.76	1.02	2.48	2.71	Dis
PS1843	2	2	+	17718939	17756684	0.01	0	0.02	0.02	0	0	0	0	Sil
PS1844	2	2	-	17760333	17764729	4.12	6.45	5.81	7.985	1.205	15.73	0.12	11.53	Fun	FBgn0000015	Abd-B
PS1845	2	2	+	17813120	17813593	0	2.045	0	20.18	0	14.97	0	44.78	Fun	FBgn0038458	VhaM9.7-d
PS1846	2	2	-	17813572	17815249	0	0.855	0.02	6.17	0.025	16.285	0.07	30.795	Fun	FBgn0015008	Actn3
PS1847	2	2	+	17822189	17825322	0.39	0.505	0.895	1.035	2.535	0.725	1.895	0.695	Fun
PS1848	2	2	-	17828697	17833755	9.3	12.79	10.74	9.35	24.395	23.19	11.97	6.59	Fun	FBgn0038460	CG18622
PS1849	2	2	+	17835307	17837127	5.155	7.94	11.93	10.15	12.285	1.335	20.175	0.28	Fun	FBgn0051274	CG31274
PS1850	2	2	-	17837371	17839115	40.96	60.61	90.1	99.005	113.77	68.475	146.27	107.54	Fun	FBgn0266917	Sf3a1
PS1851	2	2	+	17838923	17842254	7.285	9.07	10.375	18.285	14.645	67.52	19.565	121.895	Fun	FBgn0038463	CG3534
PS1852	2	2	+	17846163	17850995	36.88	32.81	25.51	23.065	16.69	12.19	13.26	11.33	Fun	FBgn0038465	Irc
PS1853	2	2	+	17851425	17856549	8.575	6.1	0.27	0.12	2.65	3.275	0.02	0.015	Fun	FBgn0038466	CG8907
PS1854	2	2	+	17858165	17870703	72.26	62.865	0.64	0.735	0.3	0.965	0	0.385	Fun	FBgn0004577	Pxd
PS1855	2	2	-	17862255	17864730	24.2	23.545	22.85	18.41	40.2	14.045	39.56	3.095	Fun	FBgn0038467	AdSL
PS1856	2	2	-	17878274	17880827	0	0	0.01	0	145.005	0.055	3.54	0.105	Fun	FBgn0038469	CG4009
PS1857	2	2	-	17881160	17881790	0	0.68	0.995	1.095	5.465	1.395	7.575	3.94	Fun	FBgn0038470	CG18213
PS1858	2	2	-	17884792	17886924	0	0.135	0	0.245	1.485	0.315	2.58	0.9	Dis	FBgn0038470	CG18213
PS1859	2	2	+	17887597	17889185	8.84	14.3	25.375	29.46	38.98	17.82	41.725	15.245	Fun	FBgn0038471	Trm7-32
PS1860	2	2	-	17888529	17890718	2.24	3.92	7.785	9.37	26.04	7.4	90.67	14.82	Fun	FBgn0038472	CG3995
PS1861	2	2	+	17891353	17896883	9.42	14.02	20.58	19.29	36.37	10.245	37.555	7.07	Fun	FBgn0266053	Patr-1
PS1862	2	2	+	17901036	17916297	6.035	8.965	24.91	21.04	4.255	11.705	2.23	3.04	Fun	FBgn0020493	Dad
PS1863	2	2	-	17916136	17918656	14.58	16.965	18.43	15.89	89.985	12.72	79.61	5.025	Fun	FBgn0038473	Ns1
PS1864	2	2	+	17918441	17919474	32.3	38.655	38.69	43.665	90.63	68.84	90.115	19.99	Fun	FBgn0038474	mRpS11
PS1865	2	2	-	17918953	17923475	3.455	5.98	7.025	6.83	11.615	5.56	10.485	2.39	Fun	FBgn0038475	Keap1
PS1866	2	2	+	17924521	17926927	22.505	27.81	36.955	39.525	57.755	17.735	47.375	16.225	Fun	FBgn0037842	CG6567
PS1867	2	2	-	17925665	17927750	1.905	2.495	6.615	6.1	7.55	2.855	12.53	1.555	Fun	FBgn0037841	CG4565
PS1868	2	2	-	17930531	17930910	0.67	0.725	0.13	0	0	2.985	0	0.195	Dis	FBgn0038468	CG5225
PS1869	2	2	-	17939870	17947193	1.295	2.11	26.745	18.585	0.375	0.715	0.125	0.07	Fun	FBgn0261053	Cad86C
PS1870	2	2	-	17962914	17964500	1.49	2.615	21.84	21.245	10.02	2.845	15.65	2.38	Dis	FBgn0037838	TTLL15
PS1871	2	2	-	17964576	17965776	0.675	0.795	7.805	3.46	6.46	0.64	13.94	0.515	Fun	FBgn0037838	TTLL15
PS1872	2	2	+	17970205	17971114	0.115	0.66	0	2.69	0.045	1.455	0	10.105	Fun	FBgn0037837	CG14693
PS1873	2	2	-	17983811	17984675	6.165	12.16	5.265	5.26	8.455	27.325	1.17	0.465	Fun	FBgn0037835	CG14687
PS1874	2	2	-	17987535	17989475	6.545	10.31	5.65	13.295	71.075	9.445	80.98	7.46	NA	FBgn0017577	Mcm5
PS1875	2	2	+	17990997	17993110	20.67	29.965	50.66	52.415	106.42	18.42	135.025	18.905	Fun	FBgn0037834	Art1
PS1876	2	2	+	17994666	17996259	12.235	20.785	39.355	58.55	58.235	54.8	94.33	95	Fun	FBgn0261380	mRpL37
PS1877	2	2	+	18002318	18005744	1596.21	2008.94	58.105	79.455	311.735	1064.78	80.34	18.875	Fun	FBgn0266451	fau
PS1878	2	2	-	18009919	18017595	11.185	7.23	32.99	19.085	4.955	10.52	5.645	1.16	Fun	FBgn0051103	CG31103
PS1879	2	2	+	18021207	18027144	5.245	7.44	10.71	10.9	7.135	7.335	14.13	42.095	Fun	FBgn0039291	CG13663
PS1880	2	2	-	18022611	18026588	1.88	1.96	2.93	3.515	1.355	5.255	0.05	1.75	Fun	FBgn0039290	CG13654
PS1881	2	2	+	18027592	18029566	8.77	10.575	19.815	19.57	102.635	14.07	104.53	19.58	Fun	FBgn0260229	Mocs2A
PS1882	2	2	-	18031654	18034060	9.37	27.655	39.775	80.605	102.76	44.28	237.695	113.125	Fun	FBgn0265047	FDY
PS1883	2	2	+	18144115	18147252	23.07	30.735	67.18	57.955	101.52	34.92	491.445	71.05	Fun	FBgn0039266	CG11791
PS1884	2	2	+	18153755	18157659	10.05	16.38	44.36	40.935	1.715	6.71	1.46	2.465	Fun	FBgn0039272	CG11836
PS1885	2	2	-	18159315	18163481	20.695	38.38	60.64	77.435	120.24	92.385	481.24	279.82	Fun	FBgn0039269	veli
PS1886	2	2	+	18169740	18171544	11.415	21.65	36.94	37.105	58.865	52.115	231.315	414.945	Fun	FBgn0039271	CG11839
PS1887	2	2	-	18172901	18174833	14.945	25.715	72.53	79.16	78.035	20.88	631.835	251.55	Fun	FBgn0051111	CG31111
PS1888	2	2	+	18178709	18199737	9.53	17.18	47.85	65.105	48.4	56.375	48.29	42.84	Dis	FBgn0002431	hyd
PS1889	2	2	+	18201950	18209199	2.35	3.17	8.825	8.275	14.37	10.805	61.84	23.065	Fun	FBgn0259178	5PtaseI
PS1890	2	2	-	18217895	18218975	0	2.88	0	14.555	0	94.655	0.045	286.885	Fun	FBgn0051115	CG31115
PS1891	2	2	+	18219273	18226835	4.875	7.67	27.96	23.315	28.29	10.7	64.22	20.295	Dis	FBgn0039261	Ythdf
PS1892	2	2	-	18227661	18232445	20.95	29.76	66.925	57.995	67.36	14.59	122.36	8.115	Fun	FBgn0039265	CG11790
PS1893	2	2	-	18255860	18256779	0.24	4.41	0.465	10.545	0.125	30.395	0.185	78.595	Fun	FBgn0011335	vers
PS1894	2	2	+	18258737	18267340	2.925	2.37	4.09	2.17	6.29	3.585	12.385	5.36	Dis	FBgn0287182	l(3)80Fj
PS1895	2	2	+	18270738	18277686	24.54	34.45	62.67	61.48	67.44	39.115	42.905	21.66	Fun	FBgn0287182	l(3)80Fj
PS1896	2	2	-	18280857	18311749	0.43	1.15	8.97	10.01	1.01	7.165	0.125	4.15	Fun	FBgn0037736	side-VII
PS1897	2	2	+	18288698	18320125	7.655	13.61	36.265	37.225	52.92	10.615	364.32	48.195	Fun	FBgn0037737	Pnn
PS1898	2	2	-	18318261	18320480	26.39	28.175	22.935	25.935	199.795	26.385	316.585	19.245	Fun	FBgn0037723	SpdS
PS1899	2	2	+	18321524	18323537	479.265	473.83	642.525	569.84	502.71	504.845	1123.56	1029.45	Dis	FBgn0005585	Calr
PS1900	2	2	+	18327134	18339387	23.84	30.92	36.63	35.055	55.07	26.55	67.79	21.485	Fun	FBgn0026150	ApepP
PS1901	2	2	-	18346790	18349809	0	0	0	0	0	0	0	0	Sil
PS1902	2	2	-	18370639	18378975	0.985	0.905	0.355	0.14	1.215	6.265	0	1.06	Fun	FBgn0058470	CG40470
PS1903	2	2	+	18379076	18406035	4.405	6.495	38.055	43.28	35.665	84.93	26.73	18.245	Dis	FBgn0011288	Snap25
PS1904	2	2	-	18408613	18415602	6.555	9.98	25.245	30.79	41.265	23.66	324.29	283.22	Fun	FBgn0039977	CG17454
PS1905	2	2	+	18420612	18431514	0.04	0.06	0.15	0.395	1.97	6.17	0.715	2.72	Fun	FBgn0267429	lovit
PS1906	2	2	+	18433811	18441922	10.47	20.47	10.76	7.725	53.34	7.755	50.885	4.63	Fun	FBgn0039207	Cftr
PS1907	2	2	-	18442089	18448004	2.235	3.62	4.455	9.04	16.075	14.925	15.845	11.405	Dis	FBgn0262167	ana1
PS1908	2	2	+	18447668	18449386	15.355	25.655	11.665	34.91	21.985	84.895	19.325	217.82	Fun	FBgn0039205	CG13623
PS1909	2	2	-	18449256	18453922	5.455	6.93	7.78	8.74	34.245	71.74	38.09	4.25	Fun	FBgn0039204	CG6607
PS1910	2	2	+	18455669	18456789	0	0.055	0.2	0.12	0	0.04	0	0	Sil	FBgn0039202	CG13622
PS1911	2	2	-	18457137	18461150	11.425	17.525	30.335	29.415	43.155	21.175	48.235	9.75	Fun	FBgn0003134	Pp1alpha-96A
PS1912	2	2	-	18461342	18466392	0.03	1.8	0.205	11.82	0.085	25.11	0.09	30.905	Fun	FBgn0039201	DZIP1
PS1913	2	2	+	18465047	18471965	1.12	1.385	13.725	12.125	2.09	8.955	0.145	0.575	Fun	FBgn0004118	nAChRbeta2
PS1914	2	2	-	18490212	18495573	0.605	0.93	9.015	7.71	0.7	3.88	0	0	Fun	FBgn0000039	nAChRalpha2
PS1915	2	2	-	18511946	18512618	0	1.93	0	15.665	0	44.065	0	215.83	Dis	FBgn0051128	CG31128
PS1916	2	2	+	18531341	18596716	1.03	1.17	16.255	17.45	0.77	4.195	0	0.16	Fun	FBgn0000036	nAChRalpha1
PS1917	2	2	-	18596844	18597758	0.215	8.105	0	0.705	0.4	3.89	0.035	3.61	Dis	FBgn0039200	CG13616
PS1918	2	2	+	18605826	18607693	0.825	4.975	0.1	0.13	0.36	0.22	0.09	0	Dis	FBgn0039197	CG17780
PS1919	2	2	-	18613968	18615207	0	0	0.03	0	0.04	0	0	0	Sil	FBgn0086610	CG33342
PS1920	2	2	+	18618498	18621052	0.02	0.315	0	0.035	0	0.06	0	0	Sil	FBgn0039196	CG17781
PS1921	2	2	+	18621598	18623779	0	0	0.035	0.07	0	0	0	0	Sil-Dis	FBgn0039195	CG17782
PS1922	2	2	-	18623831	18624971	0.05	2.38	0	0	0.12	0.09	0	0	Dis	FBgn0039194	CG13614
PS1923	2	2	+	18626778	18628575	0	0.19	0	0	0.06	0.195	0	0.15	Sil-Dis	FBgn0261994	CG42812
PS1924	2	2	-	18628585	18629407	0	0.07	0	0	0	0.07	0	0.325	Sil	FBgn0039193	CG13613
PS1925	2	2	+	18629813	18631139	0	1.04	0	3.57	0	16.675	0	36.63	Fun	FBgn0039192	CG17784
PS1926	2	2	-	18630302	18633659	0.075	4.225	0.01	16.04	0.2	120.085	0.015	327.68	Fun	FBgn0053340	CG33340
PS1927	2	2	+	18633091	18634133	4.815	13.55	11.96	44.09	17.3	173.83	44.905	813.245	Fun	FBgn0039189	CG18528
PS1928	2	2	+	18636427	18638377	9.27	14.5	12.625	21.38	38.335	35.18	37.87	35.94	Fun	FBgn0039188	Golgin84
PS1929	2	2	-	18638119	18646291	7.735	9.7	10.21	12.81	24.265	17.135	23.695	9.115	Fun	FBgn0039187	CG6454
PS1930	2	2	+	18646351	18651978	9.5	11.66	36.26	32.785	55.28	9.495	58.455	3.48	Dis	FBgn0039186	CG5746
PS1931	2	2	-	18652867	18655772	3.36	5.875	1.83	1.575	6.4	26.64	0.13	0	Fun	FBgn0011581	Ms
PS1932	2	2	-	18657782	18661040	3.84	3.955	9.305	6.315	33.43	35.29	0.035	0.58	Fun	FBgn0039184	CG6432
PS1933	2	2	-	18661569	18664901	6.04	8.855	7.075	7.895	22.08	6.005	17.525	3.325	Fun	FBgn0039183	Dis3
PS1934	2	2	+	18665337	18670973	6.04	8.085	6.59	8.04	46.49	7.145	39.17	4.575	Fun	FBgn0039182	CG5728
PS1935	2	2	-	18670349	18680949	3.92	6.96	10.26	13.975	24.905	14.03	29.365	9.29	Fun	FBgn0011785	BRWD3
PS1936	2	2	-	18681347	18682722	40.27	56.18	101.53	82.745	63.87	45.7	57.49	24.29	Fun	FBgn0036908	TORIP
PS1937	2	2	+	18684133	18689096	4.635	6.91	13.605	13.53	22.7	7.99	25.77	3.455	Fun	FBgn0028471	Nab2
PS1938	2	2	+	18689159	18690616	0.035	1.43	0.15	8.36	0.195	69.63	0.025	143.92	Dis	FBgn0035218	CG9173
PS1939	2	2	-	18691047	18712624	3.485	5.315	32.04	23.38	14.57	6.985	13.765	2.445	Dis	FBgn0259685	crb
PS1940	2	2	+	18711123	18714328	2.305	3.14	4.425	5.205	11.675	1.95	15.74	2.025	Fun
PS1941	2	2	-	18713537	18715692	2.87	4.5	12.38	13.095	7.695	3.46	8.015	1.89	Fun	FBgn0035807	CG7492
PS1942	2	2	+	18715648	18720305	1.175	1.835	2.95	2.885	3.605	2.54	6.335	4.785	Fun	FBgn0039180	CG5715
PS1943	2	2	-	18719932	18723837	6.835	8.525	10.42	10.975	22.275	18.97	21.98	9.88	Fun	FBgn0263398	Uck
PS1944	2	2	+	18724058	18726246	1.08	2.16	6.485	5.815	9.955	7.475	28.35	23.62	Fun	FBgn0087035	AGO2
PS1945	2	2	-	18729321	18731012	0.03	3.06	0.04	12.13	0.02	132.92	0	298.915	Fun	FBgn0042710	Hex-t2
PS1946	2	2	+	18731595	18733200	0	4.35	0	35.65	0	33.29	0	37.965	Fun	FBgn0042711	Hex-t1
PS1947	2	2	-	18733493	18743365	4.875	3.185	8.86	6.46	1.155	4.41	0.065	0.17	Fun	FBgn0263118	tx
PS1948	2	2	+	18761202	18762279	425.195	185.155	10.355	17.78	98.68	63.145	2.025	5.48	Fun	FBgn0040606	CG6503
PS1949	2	2	-	18772863	18774296	0	3.71	0.025	20.025	0	233.865	0	914.5	Fun	FBgn0039425	Ald2
PS1950	2	2	+	18785370	18799418	0	0	0.01	0	0.15	0.415	0	0.105	Sil	FBgn0039424	ppk15
PS1951	2	2	-	18819296	18871355	1.99	10.415	50.515	57.2	11.94	14.14	0.275	0.73	Fun	FBgn0053970	osy
PS1952	2	2	-	18915584	18931651	0.22	0.275	3.87	3.755	0.485	2.38	0	0	Fun	FBgn0039420	CG6154
PS1953	2	2	+	18932866	18938558	1265.21	868.27	177.84	121.585	406.46	993.44	144.745	110.52	Fun	FBgn0000064	Ald1
PS1954	2	2	-	18937048	18940405	5.615	5.575	2.51	1.735	0.69	1.285	0.07	0.235	Dis
PS1955	2	2	-	18940812	18942195	0.045	2.755	0	28.53	0.035	29.13	0	47.065	Fun	FBgn0037296	Prosbeta2R2
PS1956	2	2	-	18950413	18951777	0	4.335	0	48.835	0	64.645	0.03	166.765	Fun	FBgn0264472	CG43880
PS1957	2	2	-	18952102	18953517	0	2	0	11.55	0	18.005	0.03	87.315	Fun	FBgn0264472	CG43880
PS1958	2	2	-	18968484	18973941	3.885	4.805	8.63	7.595	2.615	9.88	0.8	3.04	Fun	FBgn0039419	CG12290
PS1959	2	2	+	19012227	19013288	0	0	0	0	0	193.04	0.075	4.835	Fun	FBgn0083966	CG34130
PS1960	2	2	+	19013449	19014982	0	1.65	0	6.9	0	5.335	0	7.625	Fun	FBgn0037296	Prosbeta2R2
PS1961	2	2	+	19015336	19017943	3.62	4.44	2.615	4.095	18.42	3.33	21.28	3.065	Fun	FBgn0039417	CG6073
PS1962	2	2	-	19016991	19022206	86.095	43.265	2.095	1.405	10.745	13.485	0.03	0.975	Fun	FBgn0051086	CG31086
PS1963	2	2	-	19071392	19073622	0	1.5	0	9.645	0	6.5	0	44.76	Fun	FBgn0264748	CG44006
PS1964	2	2	+	19073862	19075333	0	1.595	0	5.385	0	3.86	0	5.575	Fun
PS1965	2	2	-	19086808	19094230	0.32	0.75	1.565	6.605	0.31	4.295	0.03	4.355	Fun	FBgn0039415	CG6142
PS1966	2	2	-	19097099	19115507	0.93	2.7	3.525	3.775	7.78	4.695	0.96	5.62	Fun	FBgn0051324	CG31324
PS1967	2	2	-	19099728	19100870	0.045	1.195	0	11.44	0.245	68.965	0	143.915	Fun	FBgn0039413	CG14556
PS1968	2	2	+	19124901	19151215	0.195	0.385	2.315	1.655	0.085	0.435	0	0.12	Fun	FBgn0039411	dysf
PS1969	2	2	+	19166693	19167604	0	0.06	1.765	1.01	0.055	0.455	0	0.565	Fun	FBgn0039408	CG14551
PS1970	2	2	-	19167591	19169234	6.38	7.875	7.6	15.665	25.895	10.48	18.44	10.295	Fun	FBgn0039407	CG14544
PS1971	2	2	+	19169246	19170609	1618.11	1984.19	1973.01	1766.98	1293.11	425.51	1679.99	205.895	Fun	FBgn0037686	RpL34b
PS1972	2	2	+	19170694	19171607	39.39	50.6	72.82	69.95	46.52	17.56	31.79	8.86	Dis	FBgn0260224	CG42498
PS1973	2	2	-	19171582	19172529	8.435	11.32	11.81	15.82	90.26	9.81	223.83	17.335	Fun	FBgn0039404	CG14543
PS1974	2	2	+	19172484	19178694	30.165	33.44	15.075	16.01	64.185	23.405	65.28	7.825	Fun	FBgn0266668	Exo84
PS1975	2	2	-	19173899	19176027	60.8	81.93	73.52	78.005	56.81	38.42	41.555	23.43	Fun	FBgn0039402	Vps2
PS1976	2	2	-	19178204	19187454	32.14	52.985	127.2	160.23	85.745	55.73	87.405	38.115	Fun	FBgn0001139	gro
PS1977	2	2	+	19189444	19191613	0	4.785	0.03	30.2	0	30.2	0	29.605	Fun	FBgn0036325	CG10752
PS1978	2	2	-	19191953	19192770	11.14	19.04	13.45	13.465	0	0	0	0	Fun	FBgn0000591	E(spl)m8-HLH
PS1979	2	2	-	19195568	19196611	2.89	7.075	10.325	11.81	0.04	0	0.08	0	Fun	FBgn0002633	E(spl)m7-HLH
PS1980	2	2	-	19199312	19200460	2.055	2.295	11.615	12.185	0	0.085	0	0	Fun	FBgn0002632	E(spl)m6-BFM
PS1981	2	2	+	19204735	19205655	2.17	3.045	0.365	0.33	0	0	0	0	Fun	FBgn0002631	E(spl)m5-HLH
PS1982	2	2	+	19211480	19212200	18.6	26.55	3.26	5.14	0	0	0	0.075	Fun	FBgn0002629	E(spl)m4-BFM
PS1983	2	2	-	19212842	19214480	7.955	10.195	34.76	29.695	2.135	2.02	1.095	0.16	Fun	FBgn0002609	E(spl)m3-HLH
PS1984	2	2	+	19219090	19220109	5.97	11.785	33.97	25.47	0.775	1.255	0.13	0	Fun	FBgn0002592	E(spl)m2-BFM
PS1985	2	2	-	19221110	19221841	587.93	467.04	10.695	7.265	17.27	19.565	0	0.235	Fun	FBgn0002578	Kaz-m1
PS1986	2	2	-	19225613	19226336	23.22	40.99	24.705	23.165	0.455	0.14	0	0	Fun	FBgn0002732	E(spl)malpha-BFM
PS1987	2	2	+	19230986	19232696	7.215	8.25	13.245	11.005	2.51	3.97	1.02	0.13	Fun	FBgn0002733	E(spl)mbeta-HLH
PS1988	2	2	-	19237251	19238716	5.055	7.85	1.665	2.395	0	3.47	0	3.35	Fun	FBgn0002735	E(spl)mgamma-HLH
PS1989	2	2	-	19239983	19241666	2.475	3.56	5.025	4.21	0.05	0.525	0	0.33	Fun	FBgn0002734	E(spl)mdelta-HLH
PS1990	2	2	-	19243528	19256515	2.665	3.96	4.08	7.61	8.01	8.26	9.27	4.655	Fun	FBgn0015269	Nf1
PS1991	2	2	-	19256931	19261731	0.255	0.265	1.26	1.09	0.4	1.62	0.01	0.035	Dis	FBgn0259146	fid
PS1992	2	2	-	19273460	19278621	0.03	0.065	1.34	1.035	2.73	9.765	0	0.84	Fun	FBgn0000206	boss
PS1993	2	2	-	19279099	19281701	0.02	4.875	0.08	42.785	0.06	236.26	0	310.06	Fun	FBgn0039398	CG14540
PS1994	2	2	+	19318574	19320944	0.395	0.545	1.68	1.8	0.24	1.94	0.04	1.81	Dis	FBgn0039396	CCAP-R
PS1995	2	2	+	19322099	19323913	0	1.36	0.015	7.07	0.025	112.44	0	163.945	Fun	FBgn0039395	CG14546
PS1996	2	2	-	19323805	19341627	21.075	19.725	2.455	11.385	3.935	21.075	0.075	13.685	Fun	FBgn0250757	CG42235
PS1997	2	2	-	19345108	19346894	0	0.03	0	0.035	0.025	0.365	0	0.3	Sil	FBgn0051089	CG31089
PS1998	2	2	+	19347630	19349166	0.035	0	0.02	0	4.555	1.88	0	0.065	Dis	FBgn0051091	CG31091
[truncated: 12,539 more rows]

## Sheet: c. D. obscura
Table S6c. Chromosomal location, gene expression level, and functionality of genes in Drosophila obscura
Gene	Scaffold	Chromosome	Strand	Start	End	LF_FPKM1	LM_FPKM	PF_FPKM	PM_FPKM	WF_FPKM	WM_FPKM	O_FPKM	Te_FPKM	Functionality2	Best homolog in Dmel3	Common gene name4
OB1	scaffold_0_E	E	-	20410	22576	0	0	0	8.405	0	26.78	0	23.775	Fun	FBgn0010282	TfIIFalpha
OB2	scaffold_0_E	E	+	101780	102504	0	0.065	0	0	0	40.94	0	356.65	Fun
OB3	scaffold_0_E	E	-	106215	109985	5.34	4.49	6.125	6.875	7.11	3.87	20.945	0.69	Fun	FBgn0038279	Sdr
OB4	scaffold_0_E	E	+	127777	129409	160.92	150.435	48.42	45.02	169.06	84.315	51.72	18.525	Fun	FBgn0028662	VhaPPA1-1
OB5	scaffold_0_E	E	+	129854	131018	4.12	9.93	18.1	104.295	188.01	95.11	2248.18	466.235	Fun	FBgn0038277	RpS5b
OB6	scaffold_0_E	E	-	131883	133049	9.605	7.775	13.905	16.54	24.82	13.44	35.72	8.4	Fun	FBgn0038275	CG3817
OB7	scaffold_0_E	E	+	132928	133992	10.275	10.6	24.825	33.93	13.22	33.3	93.455	41.195	Fun	FBgn0051249	CG31249
OB8	scaffold_0_E	E	-	133910	134430	8.855	8.465	17.355	16.86	18.545	65.495	230.675	823.275	Fun	FBgn0051360	CG31360
OB9	scaffold_0_E	E	+	134316	135859	1.65	1.79	4.315	7.435	3.07	6.45	22.58	6.3	Fun	FBgn0051251	CG31251
OB10	scaffold_0_E	E	-	135502	136949	16.735	18.58	45.085	47.19	22.03	18.45	73.06	24.065	Dis	FBgn0038536	CG7655
OB11	scaffold_0_E	E	+	136739	145443	30.565	27.48	41.825	46.75	35.535	25.365	92.315	6.475	Fun	FBgn0038535	alt
OB12	scaffold_0_E	E	-	145357	148674	1.795	2.035	5.905	7.8	2.765	14.495	18.76	13.245	Fun	FBgn0000063	Mps1
OB13	scaffold_0_E	E	+	147916	149399	37.6	45.29	53.295	53.845	19.27	18.295	25.435	10.18	Fun	FBgn0038533	CG7523
OB14	scaffold_0_E	E	-	148758	167352	0.995	0.68	5.435	5.915	2.895	6.415	7.12	2.015	Dis	FBgn0038532	CG14322
OB15	scaffold_0_E	E	+	150664	151819	0.615	1.405	0	4.805	0.08	166.8	0	237.455	Fun	FBgn0036465	Rpn12R
OB16	scaffold_0_E	E	-	201961	204515	0	0	0.09	0.16	0.045	0	0	0.055	Sil	FBgn0038531	CG14325
OB17	scaffold_0_E	E	-	205110	205829	3.895	8.89	0.095	1.005	0.145	0.07	0.09	0	Fun	FBgn0038530	AttD
OB18	scaffold_0_E	E	+	206256	210201	0.025	0	0.03	0.025	0	0	0	0	Sil	FBgn0038529	CG14323
OB19	scaffold_0_E	E	-	218154	218915	0	0	0.13	0	0	0	0	0	Sil
OB20	scaffold_0_E	E	+	219026	219678	0	0	0	0	0	0	0	0	Sil
OB21	scaffold_0_E	E	-	221827	222719	2.13	1.32	0.215	0.1	0	0	0	0	Fun	FBgn0038526	CG14327
OB22	scaffold_0_E	E	-	223210	223805	0.565	0.105	0	0.285	0	0	0	0	Sil
OB23	scaffold_0_E	E	+	224921	225855	5.49	4.78	10.85	11.14	0	0	0	0	Dis
OB24	scaffold_0_E	E	-	226470	227625	0	0	0.11	0.23	0.875	0.555	0	0	Sil	FBgn0038525	CG14329
OB25	scaffold_0_E	E	-	228336	230764	9.965	10.325	18.455	17.3	10.625	8.87	19.655	2.685	Fun	FBgn0038524	sll
OB26	scaffold_0_E	E	-	231005	282039	2.11	2.235	10.25	11.17	3.415	4.275	6.215	1.395	Fun	FBgn0283499	InR
OB27	scaffold_0_E	E	-	283566	298867	23.09	19.4	68.315	66.14	19.245	14.17	35.425	4.935	Dis	FBgn0011766	E2f1
OB28	scaffold_0_E	E	-	325917	339007	12.955	12.72	15.68	16.89	12.36	7.705	18.295	2.665	Fun	FBgn0259113	PolA1
OB29	scaffold_0_E	E	+	331821	334205	0.37	0.345	0.22	0.475	1.265	6.685	0.23	2.115	Fun	FBgn0038894	CG15497
OB30	scaffold_0_E	E	-	339762	399051	12.35	10.365	17.58	14.92	2.91	1.71	0.615	0.395	Fun	FBgn0051176	CG31176
OB31	scaffold_0_E	E	+	416827	418667	18.34	19.37	40.34	41.45	18.08	16.76	157.59	15.8	Fun	FBgn0037707	RnpS1
OB32	scaffold_0_E	E	-	418457	420415	2.595	2.565	4.505	4.38	7.63	3.905	17.5	1.635	Fun	FBgn0037708	CG9386
OB33	scaffold_0_E	E	+	420502	426384	6.76	7.205	29.63	29.275	14.025	14.985	48.975	11.02	Fun	FBgn0037709	CG8199
OB34	scaffold_0_E	E	-	422188	424172	17.83	15.05	26.6	26.465	26.465	25.615	48.475	13.995	Fun	FBgn0024833	AP-1mu
OB35	scaffold_0_E	E	-	425607	428543	7.85	7.945	12.245	13.29	12.01	104.245	39.595	251.59	Fun	FBgn0037710	CG9393
OB36	scaffold_0_E	E	+	428127	429892	0.605	0.91	2.75	2.41	1.95	4.825	33.625	8.255	Fun	FBgn0037713	CG16790
OB37	scaffold_0_E	E	-	432489	434620	5.51	5.245	6.92	9.68	5.9	7.055	18.345	3.135	Fun	FBgn0261049	Vps45
OB38	scaffold_0_E	E	-	434712	435979	7.105	4.415	0.65	0.645	73.425	28.105	0.215	2.165	Fun	FBgn0037714	CG9396
OB39	scaffold_0_E	E	-	436225	438018	0	0	0.045	3.005	0.195	49.695	0	60.41	Fun	FBgn0027338	Kap-alpha3
OB40	scaffold_0_E	E	-	438253	439663	16.55	14.345	6.285	6.57	185.895	88.73	34.18	5.82	Fun	FBgn0037715	CG9399
OB41	scaffold_0_E	E	-	440674	444383	112.825	100.275	120.7	127.89	147.66	135.1	158.88	58.94	Fun	FBgn0027338	Kap-alpha3
OB42	scaffold_0_E	E	+	442370	443170	0	0.115	0	0	0.055	2.585	0	3.57	Fun
OB43	scaffold_0_E	E	+	444685	449298	3.215	3.16	6.61	9.155	4.415	15.895	17.535	9.04	Fun	FBgn0037924	CG14712
OB44	scaffold_0_E	E	-	449195	456904	8.01	7.055	27.745	27.68	20.815	26.165	33.67	15.325	Fun	FBgn0262081	Csk
OB45	scaffold_0_E	E	+	466085	470407	4.51	4.935	6.35	7.62	5.985	5.465	11.225	2.35	Fun	FBgn0037926	Elp1
OB46	scaffold_0_E	E	+	470847	488592	2.485	2.06	3.2	3.44	9.765	5.805	10.71	1.58	Dis	FBgn0259227	CG42327
OB47	scaffold_0_E	E	+	489128	489746	88.245	93.94	186.45	172.89	74.505	89.36	208.445	107.73	Fun	FBgn0037930	CG14715
OB48	scaffold_0_E	E	-	489852	492831	5.135	4.705	7.185	9.555	8.84	6.225	15.55	1.84	Fun	FBgn0038597	CG8064
OB49	scaffold_0_E	E	+	492950	493544	4.03	4.37	76.06	65.41	6.725	8.735	1.68	11.29	Fun	FBgn0038596	CG14312
OB50	scaffold_0_E	E	-	493526	501834	188.245	165.895	224.42	235.64	216.255	189.295	202.865	185.68	Fun	FBgn0026250	eIF1A
OB51	scaffold_0_E	E	+	494321	501492	0.435	0.655	1.38	1.215	0.165	0.205	0.455	0.605	Fun
OB52	scaffold_0_E	E	+	497398	498967	2.09	3.545	0.835	0.44	5.33	3.47	0.565	2.99	Fun	FBgn0038595	CG7142
OB53	scaffold_0_E	E	+	501898	505174	13.945	13.695	19.33	19.67	19.165	13.745	20.59	4.525	Fun	FBgn0038593	Vps39
OB54	scaffold_0_E	E	-	505202	508830	0.075	0.04	1.255	1.23	0.055	0.16	0.045	0	Fun	FBgn0038592	CG18599
OB55	scaffold_0_E	E	-	517464	521108	3.745	3.465	7.99	8.87	9.14	4.835	78.26	2.74	Fun	FBgn0266195	Tgs1
OB56	scaffold_0_E	E	+	521135	526721	4.49	5.2	10.61	11.865	5.64	6.9	33.21	15.685	Fun	FBgn0038590	CG12320
OB57	scaffold_0_E	E	-	524998	525412	0	0	0	0.225	16.61	14.415	0.265	6.595	Fun	FBgn0038589	CG18598
OB58	scaffold_0_E	E	-	526188	533215	133.985	126.345	314.785	327.19	192.425	162.69	314.67	100.895	Fun	FBgn0020238	14-3-3epsilon
OB59	scaffold_0_E	E	+	535516	538230	1.96	2.125	6.615	6.84	4.455	4.9	38.465	4.22	Fun	FBgn0038588	CG7156
OB60	scaffold_0_E	E	-	537819	541568	1.375	1.21	8.245	7.23	3.305	2.225	0.015	0.025	Fun	FBgn0011701	repo
OB61	scaffold_0_E	E	-	547709	549777	490.34	461.28	255.73	209.025	1748.39	998.015	171.79	12.815	Fun	FBgn0262559	Mdh2
OB62	scaffold_0_E	E	-	549862	551090	4.565	4.16	13.58	11.065	11.19	8.845	22.3	1.72	Fun	FBgn0026056	Rlip
OB63	scaffold_0_E	E	+	552517	553752	23.415	19.77	40.635	46.055	16.59	22.885	105.86	25.515	Fun	FBgn0038586	CG7168
OB64	scaffold_0_E	E	-	553636	555078	18.845	17.92	20.18	24.285	34.28	13.99	66.34	7.815	Fun	FBgn0038585	Non3
OB65	scaffold_0_E	E	+	556184	558577	4.215	4.42	7	8.55	14.33	11.405	18.115	4.425	Fun	FBgn0038584	mTerf5
OB66	scaffold_0_E	E	-	558505	559856	5.435	5.57	10.255	11.175	6.04	4.31	7.285	1.58	Fun	FBgn0038861	Trm7-34
OB67	scaffold_0_E	E	+	559793	563923	4.805	4.49	7.97	8.95	15.205	18.68	16.88	9.42	Fun	FBgn0038862	Usp8
OB68	scaffold_0_E	E	-	563859	569629	1.025	0.9	3.645	3.745	2.77	2.95	9.02	1.025	Dis	FBgn0285892	tea
OB69	scaffold_0_E	E	+	569699	570593	246.875	282.245	434.795	444.14	239.495	149.065	1191.91	259.315	Fun	FBgn0037899	RpL24-like
OB70	scaffold_0_E	E	-	570184	571324	6.07	5.985	7.435	9.58	8.995	5.82	19.18	5.795	Fun	FBgn0037898	Dtd
OB71	scaffold_0_E	E	+	571411	573582	0.145	0.26	0.08	0.035	10.59	6.445	0	0.085	Fun	FBgn0037896	ninaG
OB72	scaffold_0_E	E	+	573723	576830	1.145	0.965	0.145	0.085	11.965	7.77	0.015	0.015	Fun	FBgn0037895	CG6723
OB73	scaffold_0_E	E	-	576784	580346	11.56	12.81	10.41	13.59	15.33	13.66	57.87	5.64	Fun	FBgn0037894	Ranbp9
OB74	scaffold_0_E	E	+	580244	582769	5.995	4.865	7.74	10.35	7.83	12.22	50.985	9.055	Fun	FBgn0011774	Irbp
OB75	scaffold_0_E	E	+	583274	584416	51.65	53.74	92.8	102.1	68.26	124.21	220.82	194.005	Fun	FBgn0264694	mgr
OB76	scaffold_0_E	E	-	584926	585818	28.805	30.455	34.24	39.23	87.67	56.315	54.41	15.15	Fun	FBgn0037892	mRpL40
OB77	scaffold_0_E	E	-	586122	657442	9.21	8.035	187.985	161.83	10.505	7.425	0.02	0.35	Dis	FBgn0004595	pros
OB78	scaffold_0_E	E	+	638368	644158	1.21	1.055	6.86	7.53	0.475	30.28	0.12	82.455	Fun	FBgn0026064	KP78a
OB79	scaffold_0_E	E	+	689066	748089	0.01	0.02	0.015	0.01	0	0	0	0.005	Sil
OB80	scaffold_0_E	E	+	748291	757767	69.615	58.835	38.19	34.705	0.025	3.97	0	7	Fun
OB81	scaffold_0_E	E	-	758228	761191	134.165	113.585	70.335	66.025	320.735	273.755	46.175	137.145	Dis	FBgn0037891	CG5214
OB82	scaffold_0_E	E	+	761581	763093	69.625	47.335	24.48	32.46	158.14	100.22	174.315	95.015	Fun	FBgn0033519	CG11825
OB83	scaffold_0_E	E	-	763147	765047	0.175	0.19	3.525	3.165	2.365	2.575	0.555	2.43	Fun	FBgn0051388	CG31388
OB84	scaffold_0_E	E	+	766757	768286	3.59	4.535	11.945	14.705	5.925	5.205	19.66	3.555	Fun	FBgn0038551	Odj
OB85	scaffold_0_E	E	-	768183	770327	1.73	1.635	4.77	4.995	3.8	4.23	40.65	3.79	Fun	FBgn0038548	CG17806
OB86	scaffold_0_E	E	+	769901	772325	1.185	1.265	5.535	6.475	3.03	29.04	40.045	276.535	Dis	FBgn0038548	CG17806
OB87	scaffold_0_E	E	-	771628	778111	11.335	10.965	23.895	26.335	15.16	34.185	43.455	21.1	Fun	FBgn0039302	Nup358
OB88	scaffold_0_E	E	+	783627	784885	1729.08	1908.82	2411.2	2435.12	1160.35	557.675	3935.95	704.365	Fun	FBgn0039300	RpS27
OB89	scaffold_0_E	E	+	786369	788273	1.97	1.98	5.545	6.99	3.98	3.505	120.91	3.67	Dis	FBgn0000158	bam
OB90	scaffold_0_E	E	-	788049	794183	38.875	32.905	29.845	30.8	12.68	5.3	2.905	0.345	Fun	FBgn0039297	CG11852
OB91	scaffold_0_E	E	-	789892	791185	0	0	0	3.035	45.09	25.015	3.365	1.14	Fun	FBgn0039298	to
OB92	scaffold_0_E	E	+	796144	807783	1.125	1.385	3.81	3.72	1.875	23.75	9.525	42.86	Fun	FBgn0039294	Cad96Cb
OB93	scaffold_0_E	E	-	807334	810096	8.01	8.015	17.16	16.84	5.385	3.235	14.13	1.5	Fun	FBgn0039293	Alg9
[truncated: 16,050 more rows]

## Sheet: d. D. albomicans
Table S6d. Chromosomal location, gene expression level, and functionality of genes in Drosophila albomicans
[truncated: 18,524 more rows]

[truncated: 5 more sheets: e. D. nasuta, f. D. kohkoa, g. D. americana, h. D. texana, i. D. novamexicana]
