# Supplementary material for: Shared evolutionary trajectories of three independent neo-sex chromosomes in Drosophila
Source: HighWire-hosted journal article supplement (doi:10.1101/gr.275503.121), 2021-10-21
Supplement: SupplementalTableS7.xlsx [file SupplementalTableS7.xlsx]

## Sheet: a. D. miranda
Table S7a. Chromosomal location, expression level, and functionality of transcripts in Drosophila miranda
Gene	Transcript	Scaffold	Chromosome	Strand	Start	End	LF_FPKM1	LM_FPKM	PF_FPKM	PM_FPKM	WF_FPKM	WM_FPKM	O_FPKM	Te_FPKM	Functionality2	Best homolog in Dmel3	Common gene name4
MI1	MI1-RA	chr2	chr2	+	46	5663	0.03	0	0	0.13	0.06	0.06	0	0.195	NA
MI2	MI2-RA	chr2	chr2	-	1118	1757	0	0.09	0	0.39	0.085	0.7	0.1	0.975	Dis
MI3	MI3-RA	chr2	chr2	-	1854	2928	0.745	0.435	0.895	1.025	0.725	1.685	2.04	3.685	Dis
MI4	MI4-RA	chr2	chr2	-	9487	10762	0	0	0.035	0.095	0	0.035	0	0.125	NA
MI5	MI5-RA	chr2	chr2	+	21286	27666	0	0	0	0	0.01	0	0	0	Sil
MI6	MI6-RA	chr2	chr2	+	28056	34453	0	0	0	0.005	0	0	0.01	0	Sil
MI7	MI7-RA	chr2	chr2	-	35181	48819	0	0.015	0.065	0.14	0.295	0.015	1.24	0.105	Fun
MI8	MI8-RA	chr2	chr2	+	37094	54051	0.025	0	1.075	0.47	0.015	0.02	0	0.035	Dis
MI8	MI8-RB	chr2	chr2	+	37094	54051	0.025	0	1.075	0.47	0.015	0.02	0	0.035	Dis
MI9	MI9-RA	chr2	chr2	-	57638	62035	0	0	0	0	0	0	0.015	0	Sil
MI10	MI10-RA	chr2	chr2	+	64616	67473	0	0	0.01	0.03	0.255	0	0.095	0	Sil
MI11	MI11-RA	chr2	chr2	+	68276	82780	0.01	0	0.015	0.005	0.02	0	0.02	0	Sil
MI12	MI12-RA	chr2	chr2	-	83413	89785	0	0	0	0	0	0	0	0	Sil
MI13	MI13-RA	chr2	chr2	-	96511	104827	1.03	0.625	59.79	14.25	0.995	1.51	0.12	3.265	Fun	FBgn0039704	neo
MI14	MI14-RA	chr2	chr2	+	106385	107932	0.08	0.03	0.175	0.05	3.59	4.87	0.06	1.055	Fun	FBgn0039703	CG7829
MI14	MI14-RB	chr2	chr2	+	106391	107932	0.08	0.03	0.175	0.05	3.59	4.87	0.06	1.055	Fun	FBgn0039703	CG7829
MI15	MI15-RA	chr2	chr2	-	107883	130086	548.8	751.09	211.035	178.84	766.64	553.655	148.92	138.055	Fun	FBgn0039747	AdoR
MI15	MI15-RB	chr2	chr2	-	107883	130427	548.8	751.09	211.035	178.84	766.64	553.655	148.92	138.055	Fun	FBgn0039747	AdoR
MI15	MI15-RC	chr2	chr2	-	114897	130433	548.8	751.09	211.035	178.84	766.64	553.655	148.92	138.055	Fun	FBgn0039747	AdoR
MI15	MI15-RD	chr2	chr2	-	114898	119279	548.8	751.09	211.035	178.84	766.64	553.655	148.92	138.055	Fun	FBgn0039747	AdoR
MI15	MI15-RE	chr2	chr2	-	114904	116489	548.8	751.09	211.035	178.84	766.64	553.655	148.92	138.055	Fun	FBgn0039747	AdoR
MI16	MI16-RA	chr2	chr2	+	133180	135097	0.605	1.65	1.51	0.985	1.665	1.025	0.08	0.02	Fun	FBgn0039748	CG15529
MI17	MI17-RA	chr2	chr2	-	133931	140841	0.15	0.16	5.36	2.995	0.125	0.07	0.02	0.08	Fun	FBgn0039749	CG11498
MI18	MI18-RA	chr2	chr2	+	143276	147730	0	0	0	0	0	0	0	0	Sil
MI19	MI19-RA	chr2	chr2	-	147766	153864	3.09	3.71	23.675	17.78	6.245	5.87	0.01	0.04	Fun	FBgn0051028	CG31028
MI20	MI20-RA	chr2	chr2	-	154129	157298	2917.6	4790.07	113.425	13.78	3938.26	3126.32	61.405	5.46	Fun	FBgn0002773	Mlc2
MI20	MI20-RB	chr2	chr2	-	154135	157244	2917.6	4790.07	113.425	13.78	3938.26	3126.32	61.405	5.46	Fun	FBgn0002773	Mlc2
MI21	MI21-RA	chr2	chr2	+	155353	157178	0.315	1.005	0.77	0.04	0.73	0.33	0	0	Fun
MI22	MI22-RA	chr2	chr2	-	158153	160822	6.37	6.33	8.41	7.49	12.93	10.715	28.13	9.26	Fun	FBgn0039751	CG1983
MI22	MI22-RB	chr2	chr2	-	158455	160822	6.37	6.33	8.41	7.49	12.93	10.715	28.13	9.26	Fun	FBgn0039751	CG1983
MI23	MI23-RA	chr2	chr2	+	159136	162595	1.11	1.115	5.37	10.865	3.735	4.945	10.04	4.185	Fun	FBgn0025808	Rad17
MI24	MI24-RA	chr2	chr2	+	162947	165398	0	0.015	0	17.02	0	126.125	0	226.16	Fun	FBgn0039752	CG15530
MI25	MI25-RA	chr2	chr2	+	165809	166704	21.425	19.42	42.87	46.605	27.625	30.87	64.41	40.405	Fun	FBgn0260860	Bet5
MI25	MI25-RB	chr2	chr2	+	165809	166704	21.425	19.42	42.87	46.605	27.625	30.87	64.41	40.405	Fun	FBgn0260860	Bet5
MI26	MI26-RA	chr2	chr2	-	169870	173007	3.15	3.03	3.695	74.025	14.395	18.71	15.29	1.5	Fun	FBgn0039754	CG9747
MI26	MI26-RB	chr2	chr2	-	169870	175385	3.15	3.03	3.695	74.025	14.395	18.71	15.29	1.5	Fun	FBgn0039754	CG9747
MI27	MI27-RA	chr2	chr2	-	178741	180330	17.04	20.395	43.715	42.535	81.735	58.76	0.14	1.91	Fun	FBgn0039755	CG15531
MI28	MI28-RA	chr2	chr2	-	180443	185943	28.845	32.63	11.755	9.84	69.855	37.85	28.67	7.905	Fun	FBgn0039756	CG9743
MI28	MI28-RB	chr2	chr2	-	180443	185943	28.845	32.63	11.755	9.84	69.855	37.85	28.67	7.905	Fun	FBgn0039756	CG9743
MI29	MI29-RA	chr2	chr2	-	189717	193301	2174.13	2146.09	2633.35	2197.09	1848.07	591.65	1083.2	208.865	Fun	FBgn0039757	RpS7
MI29	MI29-RB	chr2	chr2	-	189717	193301	2174.13	2146.09	2633.35	2197.09	1848.07	591.65	1083.2	208.865	Fun	FBgn0039757	RpS7
MI29	MI29-RC	chr2	chr2	-	189806	191862	2174.13	2146.09	2633.35	2197.09	1848.07	591.65	1083.2	208.865	Fun	FBgn0039757	RpS7
MI30	MI30-RA	chr2	chr2	+	193167	194802	0	0.525	12.125	3.945	0.48	0.975	0.205	1.45	Fun	FBgn0000279	CecC
MI30	MI30-RB	chr2	chr2	+	194370	194802	0	0.525	12.125	3.945	0.48	0.975	0.205	1.45	Fun	FBgn0000279	CecC
MI31	MI31-RA	chr2	chr2	+	198545	198982	2.26	1.935	27.915	9.365	7.06	0.84	0	0.395	Fun	FBgn0000279	CecC
MI31	MI31-RB	chr2	chr2	+	198548	202356	2.26	1.935	27.915	9.365	7.06	0.84	0	0.395	Fun	FBgn0000279	CecC
MI31	MI31-RC	chr2	chr2	+	201910	202356	2.26	1.935	27.915	9.365	7.06	0.84	0	0.395	Fun	FBgn0000279	CecC
MI32	MI32-RA	chr2	chr2	-	222596	225340	0	0	1.025	0.105	0	0.09	0	0.085	Fun
MI33	MI33-RA	chr2	chr2	-	228118	230853	1.7	1.16	0.745	1.88	8.87	1.885	0.2	0.705	Fun	FBgn0039759	CG9733
MI34	MI34-RA	chr2	chr2	+	234009	235939	0	0	0.02	1.665	0	19.015	0	3.265	Fun
MI35	MI35-RA	chr2	chr2	+	236394	237781	820.735	783.05	0.39	0.92	0.135	1.14	0	0.845	Fun	FBgn0039760	CG9682
MI36	MI36-RA	chr2	chr2	+	237969	239097	2025.21	1237.74	0.195	0.485	119.8	18.54	0	0	Fun	FBgn0039761	CG18404
MI36	MI36-RB	chr2	chr2	+	238039	239097	2025.21	1237.74	0.195	0.485	119.8	18.54	0	0	Fun	FBgn0039761	CG18404
MI36	MI36-RC	chr2	chr2	+	238039	239097	2025.21	1237.74	0.195	0.485	119.8	18.54	0	0	Fun	FBgn0039761	CG18404
MI37	MI37-RA	chr2	chr2	+	262437	354883	3.745	4.26	54.13	37.665	4.695	2.635	9.945	1.65	Fun	FBgn0010113	hdc
MI37	MI37-RB	chr2	chr2	+	262444	354891	3.745	4.26	54.13	37.665	4.695	2.635	9.945	1.65	Fun	FBgn0010113	hdc
MI37	MI37-RC	chr2	chr2	+	262444	355084	3.745	4.26	54.13	37.665	4.695	2.635	9.945	1.65	Fun	FBgn0010113	hdc
MI38	MI38-RA	chr2	chr2	-	263290	264808	0.71	1.865	0.08	0.21	0.05	0.125	0.03	0.145	Dis
MI39	MI39-RA	chr2	chr2	-	270481	333650	0	0	0	0	0	0.005	0	0	Sil
MI40	MI40-RA	chr2	chr2	-	359765	362211	624.875	488.63	481.88	417.465	688.31	343.655	178.875	146.665	Fun	FBgn0015222	Fer1HCH
MI40	MI40-RB	chr2	chr2	-	359765	362586	624.875	488.63	481.88	417.465	688.31	343.655	178.875	146.665	Fun	FBgn0015222	Fer1HCH
MI40	MI40-RC	chr2	chr2	-	359765	363402	624.875	488.63	481.88	417.465	688.31	343.655	178.875	146.665	Fun	FBgn0015222	Fer1HCH
MI40	MI40-RD	chr2	chr2	-	359769	362586	624.875	488.63	481.88	417.465	688.31	343.655	178.875	146.665	Fun	FBgn0015222	Fer1HCH
MI41	MI41-RA	chr2	chr2	+	362247	364777	954.81	811.115	574.155	575.605	874.78	464.165	167.865	147.51	Fun	FBgn0015221	Fer2LCH
MI41	MI41-RB	chr2	chr2	+	363000	364754	954.81	811.115	574.155	575.605	874.78	464.165	167.865	147.51	Fun	FBgn0015221	Fer2LCH
MI42	MI42-RA	chr2	chr2	+	372348	374703	0	0	0	0	4.355	0.23	6.285	0.02	Fun
MI43	MI43-RA	chr2	chr2	-	385408	388619	4.86	4.945	7.95	6.875	24.04	6.69	27.115	6.485	Fun	FBgn0039764	CG15535
MI43	MI43-RB	chr2	chr2	-	385956	388530	4.86	4.945	7.95	6.875	24.04	6.69	27.115	6.485	Fun	FBgn0039764	CG15535
MI43	MI43-RC	chr2	chr2	-	385956	388619	4.86	4.945	7.95	6.875	24.04	6.69	27.115	6.485	Fun	FBgn0039764	CG15535
MI44	MI44-RA	chr2	chr2	+	388729	389481	26.225	24.775	46.015	59.645	68.735	45.835	203.6	85.425	Fun	FBgn0039765	mRpS18C
MI44	MI44-RB	chr2	chr2	+	388784	389490	26.225	24.775	46.015	59.645	68.735	45.835	203.6	85.425	Fun	FBgn0039765	mRpS18C
MI45	MI45-RA	chr2	chr2	-	389290	391124	11.37	9.755	27.7	27.6	22.92	13.085	25.725	8.48	Fun	FBgn0039766	CG15536
MI46	MI46-RA	chr2	chr2	-	391352	394016	8.15	9.26	20.34	32.175	13.655	20.16	29.275	13.99	Fun	FBgn0039767	CG2218
MI46	MI46-RB	chr2	chr2	-	391424	394221	8.15	9.26	20.34	32.175	13.655	20.16	29.275	13.99	Fun	FBgn0039767	CG2218
MI47	MI47-RA	chr2	chr2	+	395634	398477	20.415	25.975	0.34	0.225	3.665	1.16	0.105	0.135	Fun	FBgn0039768	CG15533
MI48	MI48-RA	chr2	chr2	+	399004	401392	44.94	54.91	0	0	15.175	4.665	0.045	0.055	Fun	FBgn0039769	CG15534
MI49	MI49-RA	chr2	chr2	-	401501	409819	0.41	0.525	1.145	1.03	1.275	1.205	0	0	Fun	FBgn0039770	CG15537
MI50	MI50-RA	chr2	chr2	-	410230	411319	0	0	0	0	0.085	0	0	0	Sil	FBgn0039771	Osi23
MI51	MI51-RA	chr2	chr2	-	411844	419708	27.44	40.68	7.38	4.375	49.52	22.105	16.97	3.525	Fun	FBgn0028646	aralar1
MI51	MI51-RB	chr2	chr2	-	411844	419708	27.44	40.68	7.38	4.375	49.52	22.105	16.97	3.525	Fun	FBgn0028646	aralar1
MI51	MI51-RC	chr2	chr2	-	411844	419784	27.44	40.68	7.38	4.375	49.52	22.105	16.97	3.525	Fun	FBgn0028646	aralar1
MI52	MI52-RA	chr2	chr2	-	421615	424275	7.745	9.095	14.495	18.61	12.81	8.6	21.31	4.625	Fun	FBgn0039773	CG2224
MI53	MI53-RA	chr2	chr2	+	425068	430791	10.085	17.78	17.28	20.405	7.995	3.135	0.52	0.41	Fun	FBgn0039774	CDase
MI53	MI53-RB	chr2	chr2	+	425622	430982	10.085	17.78	17.28	20.405	7.995	3.135	0.52	0.41	Fun	FBgn0039774	CDase
MI54	MI54-RA	chr2	chr2	+	431682	447320	17.895	21.44	26.53	34.45	27.925	19.89	13.94	6.395	Fun	FBgn0039776	PH4alphaEFB
MI55	MI55-RA	chr2	chr2	-	447910	454094	7.165	5.725	0.17	2.815	0.935	0.41	0	0	Fun	FBgn0026190	PH4alphaMP
MI56	MI56-RA	chr2	chr2	+	448143	450139	28.68	38.26	0.05	0.185	0.475	0.09	0.52	0.055	Fun	FBgn0039779	PH4alphaSG2
MI56	MI56-RB	chr2	chr2	+	448143	450140	28.68	38.26	0.05	0.185	0.475	0.09	0.52	0.055	Fun	FBgn0039779	PH4alphaSG2
MI57	MI57-RA	chr2	chr2	-	454236	457505	0.52	0.885	0.16	2.745	0.195	0.9	0	1.415	Fun	FBgn0039780	PH4alphaNE1
MI58	MI58-RA	chr2	chr2	-	458630	463551	12.86	21.67	0.07	2.955	1.965	7.15	0.01	8.02	Fun	FBgn0051014	PH4alphaSG1
MI58	MI58-RB	chr2	chr2	-	458821	463551	12.86	21.67	0.07	2.955	1.965	7.15	0.01	8.02	Fun	FBgn0051014	PH4alphaSG1
MI58	MI58-RC	chr2	chr2	-	461412	463352	12.86	21.67	0.07	2.955	1.965	7.15	0.01	8.02	Fun	FBgn0051014	PH4alphaSG1
MI59	MI59-RA	chr2	chr2	+	463607	473480	0.71	0.66	0	0.16	0.395	86.235	0.055	2.07	Fun	FBgn0039782	CG15539
MI59	MI59-RB	chr2	chr2	+	463607	473480	0.71	0.66	0	0.16	0.395	86.235	0.055	2.07	Fun	FBgn0039782	CG15539
MI59	MI59-RC	chr2	chr2	+	463607	473480	0.71	0.66	0	0.16	0.395	86.235	0.055	2.07	Fun	FBgn0039782	CG15539
MI59	MI59-RD	chr2	chr2	+	463607	473480	0.71	0.66	0	0.16	0.395	86.235	0.055	2.07	Fun	FBgn0039782	CG15539
MI59	MI59-RE	chr2	chr2	+	463607	473480	0.71	0.66	0	0.16	0.395	86.235	0.055	2.07	Fun	FBgn0039782	CG15539
MI59	MI59-RF	chr2	chr2	+	463607	473480	0.71	0.66	0	0.16	0.395	86.235	0.055	2.07	Fun	FBgn0039782	CG15539
MI59	MI59-RG	chr2	chr2	+	463607	473480	0.71	0.66	0	0.16	0.395	86.235	0.055	2.07	Fun	FBgn0039782	CG15539
MI59	MI59-RH	chr2	chr2	+	463607	473480	0.71	0.66	0	0.16	0.395	86.235	0.055	2.07	Fun	FBgn0039782	CG15539
MI59	MI59-RI	chr2	chr2	+	463607	474737	0.71	0.66	0	0.16	0.395	86.235	0.055	2.07	Fun	FBgn0039782	CG15539
MI59	MI59-RJ	chr2	chr2	+	466007	468691	0.71	0.66	0	0.16	0.395	86.235	0.055	2.07	Fun	FBgn0039782	CG15539
MI59	MI59-RK	chr2	chr2	+	466007	474737	0.71	0.66	0	0.16	0.395	86.235	0.055	2.07	Fun	FBgn0039782	CG15539
MI59	MI59-RL	chr2	chr2	+	466007	474737	0.71	0.66	0	0.16	0.395	86.235	0.055	2.07	Fun	FBgn0039782	CG15539
MI59	MI59-RM	chr2	chr2	+	466007	476521	0.71	0.66	0	0.16	0.395	86.235	0.055	2.07	Fun	FBgn0039782	CG15539
MI59	MI59-RN	chr2	chr2	+	466007	476521	0.71	0.66	0	0.16	0.395	86.235	0.055	2.07	Fun	FBgn0039782	CG15539
MI59	MI59-RO	chr2	chr2	+	466007	476521	0.71	0.66	0	0.16	0.395	86.235	0.055	2.07	Fun	FBgn0039782	CG15539
MI59	MI59-RP	chr2	chr2	+	466007	476521	0.71	0.66	0	0.16	0.395	86.235	0.055	2.07	Fun	FBgn0039782	CG15539
MI60	MI60-RA	chr2	chr2	+	468767	469188	0.085	0.345	0	0.06	0.03	29.24	0	0.675	NA	FBgn0051524	CG31524
MI60	MI60-RB	chr2	chr2	+	468767	478667	0.085	0.345	0	0.06	0.03	29.24	0	0.675	NA	FBgn0051524	CG31524
MI60	MI60-RC	chr2	chr2	+	469266	478667	0.085	0.345	0	0.06	0.03	29.24	0	0.675	NA	FBgn0051524	CG31524
MI60	MI60-RD	chr2	chr2	+	469266	478667	0.085	0.345	0	0.06	0.03	29.24	0	0.675	NA	FBgn0051524	CG31524
MI60	MI60-RE	chr2	chr2	+	469266	478667	0.085	0.345	0	0.06	0.03	29.24	0	0.675	NA	FBgn0051524	CG31524
MI59	MI59-RQ	chr2	chr2	+	471432	473480	0.71	0.66	0	0.16	0.395	86.235	0.055	2.07	Fun	FBgn0039782	CG15539
MI60	MI60-RF	chr2	chr2	+	476597	478667	0.085	0.345	0	0.06	0.03	29.24	0	0.675	NA	FBgn0051524	CG31524
MI61	MI61-RA	chr2	chr2	+	479320	481884	0.05	0.04	1.06	0.035	0	0.525	0.025	0.02	Fun	FBgn0039784	CG9698
MI62	MI62-RA	chr2	chr2	-	481984	492229	15.835	17.065	54.185	33.935	23.475	19.975	2.225	2.76	Fun	FBgn0027654	jdp
MI63	MI63-RA	chr2	chr2	-	495878	496691	0	0	3.215	1.665	0	0	0	0	Fun
MI64	MI64-RA	chr2	chr2	+	499167	549749	30.485	43.93	242.43	342.715	77.845	72.995	9.505	10.75	Fun	FBgn0082582	tmod
MI64	MI64-RB	chr2	chr2	+	499167	549749	30.485	43.93	242.43	342.715	77.845	72.995	9.505	10.75	Fun	FBgn0082582	tmod
MI64	MI64-RC	chr2	chr2	+	499167	549749	30.485	43.93	242.43	342.715	77.845	72.995	9.505	10.75	Fun	FBgn0082582	tmod
MI64	MI64-RD	chr2	chr2	+	499228	549744	30.485	43.93	242.43	342.715	77.845	72.995	9.505	10.75	Fun	FBgn0082582	tmod
MI64	MI64-RE	chr2	chr2	+	499385	549755	30.485	43.93	242.43	342.715	77.845	72.995	9.505	10.75	Fun	FBgn0082582	tmod
MI64	MI64-RF	chr2	chr2	+	499613	501386	30.485	43.93	242.43	342.715	77.845	72.995	9.505	10.75	Fun	FBgn0082582	tmod
MI64	MI64-RG	chr2	chr2	+	499613	549744	30.485	43.93	242.43	342.715	77.845	72.995	9.505	10.75	Fun	FBgn0082582	tmod
MI64	MI64-RH	chr2	chr2	+	505957	549749	30.485	43.93	242.43	342.715	77.845	72.995	9.505	10.75	Fun	FBgn0082582	tmod
MI64	MI64-RI	chr2	chr2	+	513266	549732	30.485	43.93	242.43	342.715	77.845	72.995	9.505	10.75	Fun	FBgn0082582	tmod
MI64	MI64-RJ	chr2	chr2	+	513364	549755	30.485	43.93	242.43	342.715	77.845	72.995	9.505	10.75	Fun	FBgn0082582	tmod
MI64	MI64-RK	chr2	chr2	+	513439	549744	30.485	43.93	242.43	342.715	77.845	72.995	9.505	10.75	Fun	FBgn0082582	tmod
MI65	MI65-RA	chr2	chr2	-	521970	527208	0.355	0.27	6.08	3.6	1.575	1.27	0	0	Fun
MI64	MI64-RL	chr2	chr2	+	531357	549749	30.485	43.93	242.43	342.715	77.845	72.995	9.505	10.75	Fun	FBgn0082582	tmod
MI64	MI64-RM	chr2	chr2	+	531551	549755	30.485	43.93	242.43	342.715	77.845	72.995	9.505	10.75	Fun	FBgn0082582	tmod
MI64	MI64-RN	chr2	chr2	+	531585	549749	30.485	43.93	242.43	342.715	77.845	72.995	9.505	10.75	Fun	FBgn0082582	tmod
MI64	MI64-RO	chr2	chr2	+	531642	549744	30.485	43.93	242.43	342.715	77.845	72.995	9.505	10.75	Fun	FBgn0082582	tmod
MI66	MI66-RA	chr2	chr2	-	543425	549635	0	0	3.935	1.6	0	0.08	0	0	Dis
MI67	MI67-RA	chr2	chr2	+	550330	553303	11.64	15.16	1.96	11.885	2.775	1.685	0	0.205	Fun	FBgn0039787	CG9702
MI68	MI68-RA	chr2	chr2	-	557698	578693	5.105	5.775	16.92	26.93	14.785	19.775	5.975	8.97	Fun	FBgn0051038	CG31038
MI68	MI68-RB	chr2	chr2	-	558316	567616	5.105	5.775	16.92	26.93	14.785	19.775	5.975	8.97	Fun	FBgn0051038	CG31038
MI68	MI68-RC	chr2	chr2	-	558316	569249	5.105	5.775	16.92	26.93	14.785	19.775	5.975	8.97	Fun	FBgn0051038	CG31038
MI68	MI68-RD	chr2	chr2	-	558335	578446	5.105	5.775	16.92	26.93	14.785	19.775	5.975	8.97	Fun	FBgn0051038	CG31038
MI68	MI68-RE	chr2	chr2	-	558335	578446	5.105	5.775	16.92	26.93	14.785	19.775	5.975	8.97	Fun	FBgn0051038	CG31038
MI68	MI68-RF	chr2	chr2	-	558443	578200	5.105	5.775	16.92	26.93	14.785	19.775	5.975	8.97	Fun	FBgn0051038	CG31038
MI69	MI69-RA	chr2	chr2	-	579339	585583	8.07	10.78	6.74	31.615	20.495	56.56	20.315	52.31	Fun	FBgn0083969	CG34133
MI70	MI70-RA	chr2	chr2	+	584730	589499	40.515	25.53	47.49	79.215	49.12	151.75	96.305	314.18	Fun	FBgn0039714	Zip99C
MI70	MI70-RB	chr2	chr2	+	584793	589492	40.515	25.53	47.49	79.215	49.12	151.75	96.305	314.18	Fun	FBgn0039714	Zip99C
MI70	MI70-RC	chr2	chr2	+	586455	589492	40.515	25.53	47.49	79.215	49.12	151.75	96.305	314.18	Fun	FBgn0039714	Zip99C
MI70	MI70-RD	chr2	chr2	+	587592	589444	40.515	25.53	47.49	79.215	49.12	151.75	96.305	314.18	Fun	FBgn0039714	Zip99C
MI71	MI71-RA	chr2	chr2	-	589431	591115	2909.33	2861.05	4677.44	3863.05	2445.39	699.08	3931.13	439.02	Fun	FBgn0039713	RpS8
MI71	MI71-RB	chr2	chr2	-	589431	591236	2909.33	2861.05	4677.44	3863.05	2445.39	699.08	3931.13	439.02	Fun	FBgn0039713	RpS8
MI71	MI71-RC	chr2	chr2	-	589467	592083	2909.33	2861.05	4677.44	3863.05	2445.39	699.08	3931.13	439.02	Fun	FBgn0039713	RpS8
MI72	MI72-RA	chr2	chr2	+	591898	596338	4.675	5.24	13.395	23.165	31.595	17.08	124.115	16.12	Fun	FBgn0039712	CG15514
MI72	MI72-RB	chr2	chr2	+	591898	596338	4.675	5.24	13.395	23.165	31.595	17.08	124.115	16.12	Fun	FBgn0039712	CG15514
MI72	MI72-RC	chr2	chr2	+	591898	596338	4.675	5.24	13.395	23.165	31.595	17.08	124.115	16.12	Fun	FBgn0039712	CG15514
MI72	MI72-RD	chr2	chr2	+	591898	598896	4.675	5.24	13.395	23.165	31.595	17.08	124.115	16.12	Fun	FBgn0039712	CG15514
MI72	MI72-RE	chr2	chr2	+	591898	598896	4.675	5.24	13.395	23.165	31.595	17.08	124.115	16.12	Fun	FBgn0039712	CG15514
MI72	MI72-RF	chr2	chr2	+	591916	595675	4.675	5.24	13.395	23.165	31.595	17.08	124.115	16.12	Fun	FBgn0039712	CG15514
MI72	MI72-RG	chr2	chr2	+	591928	596311	4.675	5.24	13.395	23.165	31.595	17.08	124.115	16.12	Fun	FBgn0039712	CG15514
MI72	MI72-RH	chr2	chr2	+	591928	598896	4.675	5.24	13.395	23.165	31.595	17.08	124.115	16.12	Fun	FBgn0039712	CG15514
MI72	MI72-RI	chr2	chr2	+	591928	598896	4.675	5.24	13.395	23.165	31.595	17.08	124.115	16.12	Fun	FBgn0039712	CG15514
MI72	MI72-RJ	chr2	chr2	+	594569	596338	4.675	5.24	13.395	23.165	31.595	17.08	124.115	16.12	Fun	FBgn0039712	CG15514
MI72	MI72-RK	chr2	chr2	+	594569	598896	4.675	5.24	13.395	23.165	31.595	17.08	124.115	16.12	Fun	FBgn0039712	CG15514
MI72	MI72-RL	chr2	chr2	+	597139	598896	4.675	5.24	13.395	23.165	31.595	17.08	124.115	16.12	Fun	FBgn0039712	CG15514
MI73	MI73-RA	chr2	chr2	+	599732	601665	0.265	1.57	0.57	9.605	12.675	5.55	45.105	4.69	Fun	FBgn0033921	tej
MI74	MI74-RA	chr2	chr2	+	601860	606104	7.85	7.115	12.61	24.05	17.515	14.62	37.44	10.545	Fun	FBgn0039710	dgt1
MI75	MI75-RA	chr2	chr2	-	605629	619018	2.62	3.17	13.19	6.885	12.585	2.47	8.155	0.135	Fun	FBgn0039709	Cad99C
MI75	MI75-RB	chr2	chr2	-	605635	619018	2.62	3.17	13.19	6.885	12.585	2.47	8.155	0.135	Fun	FBgn0039709	Cad99C
MI75	MI75-RC	chr2	chr2	-	605698	619012	2.62	3.17	13.19	6.885	12.585	2.47	8.155	0.135	Fun	FBgn0039709	Cad99C
MI76	MI76-RA	chr2	chr2	-	624635	649941	18.695	19.825	25.065	31.665	30.03	19.645	22.8	18.23	Fun	FBgn0266411	sima
MI76	MI76-RB	chr2	chr2	-	624635	691174	18.695	19.825	25.065	31.665	30.03	19.645	22.8	18.23	Fun	FBgn0266411	sima
MI76	MI76-RC	chr2	chr2	-	624651	690944	18.695	19.825	25.065	31.665	30.03	19.645	22.8	18.23	Fun	FBgn0266411	sima
MI76	MI76-RD	chr2	chr2	-	633272	684302	18.695	19.825	25.065	31.665	30.03	19.645	22.8	18.23	Fun	FBgn0266411	sima
MI77	MI77-RA	chr2	chr2	+	689069	692419	2.795	3.4	6.53	16.945	12.165	6.175	85.385	10.595	Fun	FBgn0003479	spn-A
MI77	MI77-RB	chr2	chr2	+	690874	692906	2.795	3.4	6.53	16.945	12.165	6.175	85.385	10.595	Fun	FBgn0003479	spn-A
MI78	MI78-RA	chr2	chr2	-	692646	694907	11.645	12.89	43.74	62.175	32.06	47.365	48.395	51.575	Fun	FBgn0039743	Jasper
MI79	MI79-RA	chr2	chr2	+	696296	699504	18.405	13.57	0.295	1.305	6.99	8.1	1.235	1.675	Fun	FBgn0039742	CG15528
MI80	MI80-RA	chr2	chr2	-	698230	701249	2.56	3.185	2.725	4.975	14.8	11.61	19.86	13.535	Fun	FBgn0039741	CG7943
MI81	MI81-RA	chr2	chr2	+	701304	702419	1913.77	1847.48	3306.45	2533.26	1665.68	556.135	1125.38	268.435	Dis	FBgn0002626	RpL32
MI81	MI81-RB	chr2	chr2	+	701304	702419	1913.77	1847.48	3306.45	2533.26	1665.68	556.135	1125.38	268.435	Dis	FBgn0002626	RpL32
MI82	MI82-RA	chr2	chr2	-	701502	703851	9.045	8.645	22.785	29.175	14.355	9.09	36.725	6.975	Fun	FBgn0003512	Sry-delta
MI83	MI83-RA	chr2	chr2	-	709424	713350	1.435	1.375	8.625	8.125	4.275	4.83	6.34	3.32	Fun	FBgn0003511	Sry-beta
MI83	MI83-RB	chr2	chr2	-	709424	714879	1.435	1.375	8.625	8.125	4.275	4.83	6.34	3.32	Fun	FBgn0003511	Sry-beta
MI83	MI83-RC	chr2	chr2	-	709426	714879	1.435	1.375	8.625	8.125	4.275	4.83	6.34	3.32	Fun	FBgn0003511	Sry-beta
MI84	MI84-RA	chr2	chr2	+	711302	716924	26.645	32.97	42.245	58.88	55.165	201.895	82.67	1810.38	Fun	FBgn0039740	ZIPIC
MI84	MI84-RB	chr2	chr2	+	713433	714894	26.645	32.97	42.245	58.88	55.165	201.895	82.67	1810.38	Fun	FBgn0039740	ZIPIC
MI84	MI84-RC	chr2	chr2	+	713470	714853	26.645	32.97	42.245	58.88	55.165	201.895	82.67	1810.38	Fun	FBgn0039740	ZIPIC
MI83	MI83-RD	chr2	chr2	-	713637	714125	1.435	1.375	8.625	8.125	4.275	4.83	6.34	3.32	Fun	FBgn0003511	Sry-beta
MI84	MI84-RD	chr2	chr2	+	713764	717161	26.645	32.97	42.245	58.88	55.165	201.895	82.67	1810.38	Fun	FBgn0039740	ZIPIC
MI85	MI85-RA	chr2	chr2	-	716847	731056	2.54	2.69	11.19	10.72	9.68	6.19	16.475	3.39	Fun	FBgn0026597	Axn
MI85	MI85-RB	chr2	chr2	-	716847	731056	2.54	2.69	11.19	10.72	9.68	6.19	16.475	3.39	Fun	FBgn0026597	Axn
MI85	MI85-RC	chr2	chr2	-	716849	730781	2.54	2.69	11.19	10.72	9.68	6.19	16.475	3.39	Fun	FBgn0026597	Axn
MI86	MI86-RA	chr2	chr2	+	731280	738596	2.47	2.705	9.745	12.385	16.97	20.815	11.835	9.74	Fun	FBgn0039738	Mgat2
MI86	MI86-RB	chr2	chr2	+	731280	738596	2.47	2.705	9.745	12.385	16.97	20.815	11.835	9.74	Fun	FBgn0039738	Mgat2
MI86	MI86-RC	chr2	chr2	+	731354	738275	2.47	2.705	9.745	12.385	16.97	20.815	11.835	9.74	Fun	FBgn0039738	Mgat2
MI87	MI87-RA	chr2	chr2	-	737652	740990	1.095	1.17	3.01	6.085	2.325	3.955	11.3	4.1	Fun	FBgn0003545	sub
MI88	MI88-RA	chr2	chr2	+	740117	745081	180.185	221.96	87.46	83.27	285.085	216.66	78.525	188.145	Fun	FBgn0039737	CG7920
MI89	MI89-RA	chr2	chr2	-	745035	750063	230.25	212.17	614.325	519.51	527.21	79.865	415.75	67.79	Fun	FBgn0016685	Nlp
MI90	MI90-RA	chr2	chr2	+	751109	752134	87.325	91.08	198.915	175.68	409.465	75.23	6410.56	486.93	Fun	FBgn0039735	Nph
MI91	MI91-RA	chr2	chr2	-	752156	758005	3.385	3.555	11.995	21.68	7.1	63.03	18.425	71.545	Fun	FBgn0039734	Tace
MI91	MI91-RB	chr2	chr2	-	752157	757970	3.385	3.555	11.995	21.68	7.1	63.03	18.425	71.545	Fun	FBgn0039734	Tace
MI92	MI92-RA	chr2	chr2	+	755540	758975	5.025	4.38	12.215	11.11	10.65	5.705	20.82	4.78	Fun	FBgn0039732	CG15525
MI93	MI93-RA	chr2	chr2	-	758465	760455	2.05	2.755	7.985	44.295	4.39	37.91	19.535	35.72	Fun	FBgn0039731	Sas-6
MI94	MI94-RA	chr2	chr2	+	760494	762291	13.77	12.67	34.915	27.845	23.1	12.75	38.23	5.555	Fun	FBgn0000032	Acph-1
MI94	MI94-RB	chr2	chr2	+	760514	764576	13.77	12.67	34.915	27.845	23.1	12.75	38.23	5.555	Fun	FBgn0000032	Acph-1
MI95	MI95-RA	chr2	chr2	-	764588	771772	5.29	5.145	21.13	13.945	2.26	1.325	0.015	0.03	Fun	FBgn0039728	CG7896
MI96	MI96-RA	chr2	chr2	+	783230	799313	0.71	0.505	5.01	4.23	1	1.6	0.15	0.65	Fun	FBgn0004622	TkR99D
MI96	MI96-RB	chr2	chr2	+	794525	799310	0.71	0.505	5.01	4.23	1	1.6	0.15	0.65	Fun	FBgn0004622	TkR99D
MI97	MI97-RA	chr2	chr2	-	801181	813637	2.555	3.07	3.21	14.7	4.97	52.755	4.23	49.285	Fun	FBgn0039727	Vps13B
MI97	MI97-RB	chr2	chr2	-	801243	813637	2.555	3.07	3.21	14.7	4.97	52.755	4.23	49.285	Fun	FBgn0039727	Vps13B
MI97	MI97-RC	chr2	chr2	-	801243	813637	2.555	3.07	3.21	14.7	4.97	52.755	4.23	49.285	Fun	FBgn0039727	Vps13B
MI98	MI98-RA	chr2	chr2	+	813392	816920	15.48	13.615	18.5	19.05	19.81	13.85	23.12	8.495	Fun	FBgn0039726	eIF2Balpha
MI98	MI98-RB	chr2	chr2	+	813392	816921	15.48	13.615	18.5	19.05	19.81	13.85	23.12	8.495	Fun	FBgn0039726	eIF2Balpha
MI98	MI98-RC	chr2	chr2	+	813407	815425	15.48	13.615	18.5	19.05	19.81	13.85	23.12	8.495	Fun	FBgn0039726	eIF2Balpha
MI98	MI98-RD	chr2	chr2	+	813407	815425	15.48	13.615	18.5	19.05	19.81	13.85	23.12	8.495	Fun	FBgn0039726	eIF2Balpha
MI99	MI99-RA	chr2	chr2	-	814822	818096	5.32	4.82	11.76	17.795	11.195	23.835	9.89	26.265	Fun	FBgn0260760	CG42558
MI99	MI99-RB	chr2	chr2	-	814822	818096	5.32	4.82	11.76	17.795	11.195	23.835	9.89	26.265	Fun	FBgn0260760	CG42558
MI99	MI99-RC	chr2	chr2	-	814822	818096	5.32	4.82	11.76	17.795	11.195	23.835	9.89	26.265	Fun	FBgn0260760	CG42558
MI100	MI100-RA	chr2	chr2	+	817952	818867	18.75	20.82	31.34	39.88	21.14	49.48	5.25	89.77	Fun	FBgn0085312	CG34283
MI101	MI101-RA	chr2	chr2	-	818493	827810	1.16	1.39	4.315	5.915	2.66	2.95	1.64	2.37	Fun	FBgn0000119	arr
MI101	MI101-RB	chr2	chr2	-	818921	827810	1.16	1.39	4.315	5.915	2.66	2.95	1.64	2.37	Fun	FBgn0000119	arr
MI102	MI102-RA	chr2	chr2	+	828839	836168	29.445	32.65	5.08	11.09	6.86	15.345	6.32	12.54	Fun	FBgn0051040	Cog7
MI103	MI103-RA	chr2	chr2	-	833138	834903	0.215	0.07	11.11	5.045	1.435	1.3	0	0.025	Fun	FBgn0039723	CG15522
MI104	MI104-RA	chr2	chr2	+	837016	841651	25949.9	29003.9	4.56	1.255	1234.39	372.955	0	0.13	Fun	FBgn0003356	Jon99Cii
MI104	MI104-RB	chr2	chr2	+	837016	841651	25949.9	29003.9	4.56	1.255	1234.39	372.955	0	0.13	Fun	FBgn0003356	Jon99Cii
MI104	MI104-RC	chr2	chr2	+	837016	845086	25949.9	29003.9	4.56	1.255	1234.39	372.955	0	0.13	Fun	FBgn0003356	Jon99Cii
MI104	MI104-RD	chr2	chr2	+	837016	845086	25949.9	29003.9	4.56	1.255	1234.39	372.955	0	0.13	Fun	FBgn0003356	Jon99Cii
MI104	MI104-RE	chr2	chr2	+	837016	845086	25949.9	29003.9	4.56	1.255	1234.39	372.955	0	0.13	Fun	FBgn0003356	Jon99Cii
MI104	MI104-RF	chr2	chr2	+	837016	845086	25949.9	29003.9	4.56	1.255	1234.39	372.955	0	0.13	Fun	FBgn0003356	Jon99Cii
MI104	MI104-RG	chr2	chr2	+	837016	845086	25949.9	29003.9	4.56	1.255	1234.39	372.955	0	0.13	Fun	FBgn0003356	Jon99Cii
MI104	MI104-RH	chr2	chr2	+	837016	845093	25949.9	29003.9	4.56	1.255	1234.39	372.955	0	0.13	Fun	FBgn0003356	Jon99Cii
MI104	MI104-RI	chr2	chr2	+	837016	845093	25949.9	29003.9	4.56	1.255	1234.39	372.955	0	0.13	Fun	FBgn0003356	Jon99Cii
MI104	MI104-RJ	chr2	chr2	+	837061	845093	25949.9	29003.9	4.56	1.255	1234.39	372.955	0	0.13	Fun	FBgn0003356	Jon99Cii
MI104	MI104-RK	chr2	chr2	+	837061	845093	25949.9	29003.9	4.56	1.255	1234.39	372.955	0	0.13	Fun	FBgn0003356	Jon99Cii
MI104	MI104-RL	chr2	chr2	+	837061	845093	25949.9	29003.9	4.56	1.255	1234.39	372.955	0	0.13	Fun	FBgn0003356	Jon99Cii
MI104	MI104-RM	chr2	chr2	+	837068	845093	25949.9	29003.9	4.56	1.255	1234.39	372.955	0	0.13	Fun	FBgn0003356	Jon99Cii
MI104	MI104-RN	chr2	chr2	+	837095	845086	25949.9	29003.9	4.56	1.255	1234.39	372.955	0	0.13	Fun	FBgn0003356	Jon99Cii
MI104	MI104-RO	chr2	chr2	+	840565	847477	25949.9	29003.9	4.56	1.255	1234.39	372.955	0	0.13	Fun	FBgn0003356	Jon99Cii
MI105	MI105-RA	chr2	chr2	+	850329	855495	0	0.03	0.02	0.025	35.075	26.03	0	0.03	Fun	FBgn0003861	trp
MI106	MI106-RA	chr2	chr2	+	855758	857192	1.505	2.5	9.73	5.225	3.66	4.64	0	0.065	Fun	FBgn0039722	Capa
MI107	MI107-RA	chr2	chr2	-	857200	861896	0.075	0.05	0.55	0.46	0.66	1.165	0.015	0.535	Fun	FBgn0051036	CG31036
MI108	MI108-RA	chr2	chr2	-	863028	863918	183.725	331.345	9.515	1	65.545	25.07	0	0	Fun	FBgn0039719	CG15515
MI109	MI109-RA	chr2	chr2	-	866697	869566	6.08	4.45	1.38	1.115	6.925	4.085	0.535	0.155	Fun	FBgn0039789	CG9717
MI110	MI110-RA	chr2	chr2	-	874432	883213	40.165	35.77	50.41	42.895	56.34	23.3	94.77	8.49	Fun	FBgn0039790	CG2246
MI110	MI110-RB	chr2	chr2	-	874443	882425	40.165	35.77	50.41	42.895	56.34	23.3	94.77	8.49	Fun	FBgn0039790	CG2246
MI111	MI111-RA	chr2	chr2	+	883242	887520	0.195	0.17	1.425	2.73	3.62	72	5.215	4.345	Fun	FBgn0051021	CG31021
MI111	MI111-RB	chr2	chr2	+	883252	887179	0.195	0.17	1.425	2.73	3.62	72	5.215	4.345	Fun	FBgn0051021	CG31021
MI111	MI111-RC	chr2	chr2	+	883278	887183	0.195	0.17	1.425	2.73	3.62	72	5.215	4.345	Fun	FBgn0051021	CG31021
MI111	MI111-RD	chr2	chr2	+	885303	887183	0.195	0.17	1.425	2.73	3.62	72	5.215	4.345	Fun	FBgn0051021	CG31021
MI112	MI112-RA	chr2	chr2	+	887758	890396	0	0	0.02	19.975	0.015	65.01	0.255	64.145	Fun	FBgn0051017	PH4alphaNE3
MI112	MI112-RB	chr2	chr2	+	887758	890396	0	0	0.02	19.975	0.015	65.01	0.255	64.145	Fun	FBgn0051017	PH4alphaNE3
MI112	MI112-RC	chr2	chr2	+	887758	890396	0	0	0.02	19.975	0.015	65.01	0.255	64.145	Fun	FBgn0051017	PH4alphaNE3
MI113	MI113-RA	chr2	chr2	-	890629	892848	0	0	0	7.07	0	20.91	0.03	20.605	Dis	FBgn0051016	CG31016
MI113	MI113-RB	chr2	chr2	-	890629	894927	0	0	0	7.07	0	20.91	0.03	20.605	Dis	FBgn0051016	CG31016
MI113	MI113-RC	chr2	chr2	-	890629	896326	0	0	0	7.07	0	20.91	0.03	20.605	Dis	FBgn0051016	CG31016
MI113	MI113-RD	chr2	chr2	-	894999	896326	0	0	0	7.07	0	20.91	0.03	20.605	Dis	FBgn0051016	CG31016
MI114	MI114-RA	chr2	chr2	+	896776	898714	0	0	0	0.02	0	6.125	0	0.245	NA	FBgn0051016	CG31016
MI115	MI115-RA	chr2	chr2	-	908032	909508	0	0.235	0	23.595	0	46.48	0	80.235	Fun	FBgn0031021	ND-18
MI116	MI116-RA	chr2	chr2	+	909181	910075	0	0.05	0	2.255	0	0.79	0	1.43	Fun	FBgn0030082	HP1b
MI117	MI117-RA	chr2	chr2	-	910447	911449	0	0.435	0	31.015	0	21.415	0	24.55	Fun	FBgn0051013	CG31013
MI117	MI117-RB	chr2	chr2	-	910447	959757	0	0.435	0	31.015	0	21.415	0	24.55	Fun	FBgn0051013	CG31013
MI118	MI118-RA	chr2	chr2	+	911341	913461	0	0	0	0.63	0	2.215	0	2.38	Fun	FBgn0051013	CG31013
MI118	MI118-RB	chr2	chr2	+	911390	912242	0	0	0	0.63	0	2.215	0	2.38	Fun	FBgn0051013	CG31013
MI119	MI119-RA	chr2	chr2	-	928512	931935	0	0.6	0	63.875	0	107.24	0	164.85	Fun
MI119	MI119-RB	chr2	chr2	-	928516	931935	0	0.6	0	63.875	0	107.24	0	164.85	Fun
MI120	MI120-RA	chr2	chr2	+	934518	937025	0.01	0	0	6.52	0	35.19	0.015	54.45	Fun	FBgn0051017	PH4alphaNE3
MI120	MI120-RB	chr2	chr2	+	934518	944325	0.01	0	0	6.52	0	35.19	0.015	54.45	Fun	FBgn0051017	PH4alphaNE3
MI120	MI120-RC	chr2	chr2	+	934518	944325	0.01	0	0	6.52	0	35.19	0.015	54.45	Fun	FBgn0051017	PH4alphaNE3
MI121	MI121-RA	chr2	chr2	-	938709	939991	0	0	0	0	0	4.245	0.04	0.235	NA	FBgn0051016	CG31016
MI117	MI117-RC	chr2	chr2	-	957542	959922	0	0.435	0	31.015	0	21.415	0	24.55	Fun	FBgn0051013	CG31013
MI117	MI117-RD	chr2	chr2	-	957542	959922	0	0.435	0	31.015	0	21.415	0	24.55	Fun	FBgn0051013	CG31013
MI122	MI122-RA	chr2	chr2	+	959141	959695	0	0	0	2.16	0	2.55	0	3.67	Dis
MI123	MI123-RA	chr2	chr2	-	961364	963558	25.61	27.275	0.045	0.125	0.39	0.96	19.47	0.63	Dis	FBgn0051015	PH4alphaPV
MI124	MI124-RA	chr2	chr2	+	963864	964852	0.075	0.09	0	6.58	0	27.12	0	43.33	Fun	FBgn0085462	CG34433
MI125	MI125-RA	chr2	chr2	+	1002009	1004278	0.6	0.46	345.85	21.495	53.6	23.24	0	0.845	Fun	FBgn0039795	Spn100A
MI126	MI126-RA	chr2	chr2	-	1005550	1008921	0.015	0.03	0	24.87	0.175	126.13	0.43	210.06	Fun	FBgn0000274	Pka-C2
MI126	MI126-RB	chr2	chr2	-	1005550	1008934	0.015	0.03	0	24.87	0.175	126.13	0.43	210.06	Fun	FBgn0000274	Pka-C2
MI126	MI126-RC	chr2	chr2	-	1005924	1008934	0.015	0.03	0	24.87	0.175	126.13	0.43	210.06	Fun	FBgn0000274	Pka-C2
MI126	MI126-RD	chr2	chr2	-	1005924	1008934	0.015	0.03	0	24.87	0.175	126.13	0.43	210.06	Fun	FBgn0000274	Pka-C2
MI127	MI127-RA	chr2	chr2	-	1017011	1018749	0.03	0.28	0.07	16.21	0.95	109.785	1.65	217.025	Fun	FBgn0051010	CG31010
MI127	MI127-RB	chr2	chr2	-	1017017	1018720	0.03	0.28	0.07	16.21	0.95	109.785	1.65	217.025	Fun	FBgn0051010	CG31010
MI128	MI128-RA	chr2	chr2	+	1026292	1028218	0	0	0	0.62	0	1.935	0	2.155	Dis
MI129	MI129-RA	chr2	chr2	+	1040573	1042409	0	0.305	0.02	36.905	0	81.65	0	144.495	Fun	FBgn0039797	eIF4H2
MI130	MI130-RA	chr2	chr2	+	1057849	1059127	0	0.06	0	25.53	0	47.045	0	146.005	Fun	FBgn0039799	CG15543
MI131	MI131-RA	chr2	chr2	-	1060124	1060691	931.4	934.475	1406.08	1081.43	737.485	463.1	5.84	37.495	Fun	FBgn0039800	Npc2g
MI132	MI132-RA	chr2	chr2	+	1086680	1114598	1.41	1.405	11.13	9.615	6.125	2.745	7.695	1.055	Fun	FBgn0004606	zfh1
MI132	MI132-RB	chr2	chr2	+	1107916	1114616	1.41	1.405	11.13	9.615	6.125	2.745	7.695	1.055	Fun	FBgn0004606	zfh1
MI132	MI132-RC	chr2	chr2	+	1108645	1114595	1.41	1.405	11.13	9.615	6.125	2.745	7.695	1.055	Fun	FBgn0004606	zfh1
MI133	MI133-RA	chr2	chr2	-	1115559	1135780	4.115	4.84	17.465	13.49	13.47	7.68	15.78	2.37	Fun	FBgn0011739	wts
MI133	MI133-RB	chr2	chr2	-	1115561	1135773	4.115	4.84	17.465	13.49	13.47	7.68	15.78	2.37	Fun	FBgn0011739	wts
MI134	MI134-RA	chr2	chr2	-	1136496	1165368	0.015	0.815	0.105	11.72	0.06	10.76	0.015	9.265	Fun	FBgn0037082	CG5664
MI134	MI134-RB	chr2	chr2	-	1136496	1165368	0.015	0.815	0.105	11.72	0.06	10.76	0.015	9.265	Fun	FBgn0037082	CG5664
MI135	MI135-RA	chr2	chr2	+	1139059	1140018	70.775	81.16	106.945	140.375	108.705	108.875	119.205	116.81	Fun	FBgn0039802	dj-1beta
MI136	MI136-RA	chr2	chr2	+	1140395	1166061	11.04	10	20.905	40.505	15.185	23.28	16.47	29.1	Fun	FBgn0027598	cindr
MI136	MI136-RB	chr2	chr2	+	1157454	1166057	11.04	10	20.905	40.505	15.185	23.28	16.47	29.1	Fun	FBgn0027598	cindr
MI137	MI137-RA	chr2	chr2	+	1166738	1182032	0.545	0.855	14.145	23.175	0.705	0.62	0	0.2	Fun	FBgn0039804	CG15544
MI137	MI137-RB	chr2	chr2	+	1166738	1182055	0.545	0.855	14.145	23.175	0.705	0.62	0	0.2	Fun	FBgn0039804	CG15544
MI137	MI137-RC	chr2	chr2	+	1166738	1182055	0.545	0.855	14.145	23.175	0.705	0.62	0	0.2	Fun	FBgn0039804	CG15544
MI138	MI138-RA	chr2	chr2	+	1182476	1195668	0.2	0.205	0.285	0.57	0.02	0.01	0	0.015	Sil	FBgn0003720	tll
MI139	MI139-RA	chr2	chr2	+	1209818	1211445	9.165	12.39	29.315	442.095	82.045	59.965	0	0	Fun	FBgn0039805	Cpr100A
MI140	MI140-RA	chr2	chr2	-	1209911	1211243	0	0	0.29	1.505	0.13	0.035	0	0	Fun
MI141	MI141-RA	chr2	chr2	+	1213570	1218516	0.815	1.65	3.88	16.25	6.26	19.37	17.735	17.91	Fun	FBgn0052438	SMC5
MI142	MI142-RA	chr2	chr2	-	1218499	1219220	0.19	0.13	5.115	1.18	0.12	0.29	0	0	Dis	FBgn0039806	CG15545
MI143	MI143-RA	chr2	chr2	-	1221614	1223405	12.45	11.765	2.145	5.135	13.545	11.195	0	0.665	Fun	FBgn0039807	CG15546
MI144	MI144-RA	chr2	chr2	-	1223828	1228840	0.625	0.43	8.165	5.595	2.63	2.32	0.01	0.29	Fun	FBgn0039808	CG12071
MI144	MI144-RB	chr2	chr2	-	1224058	1228714	0.625	0.43	8.165	5.595	2.63	2.32	0.01	0.29	Fun	FBgn0039808	CG12071
MI145	MI145-RA	chr2	chr2	-	1229961	1231694	0.615	0.51	0.885	25.61	0.56	45.125	0.56	47	Fun	FBgn0039809	CG15547
MI146	MI146-RA	chr2	chr2	-	1231852	1238187	349.23	329.175	208.64	252.3	173.455	205.055	65.455	147.01	Fun	FBgn0000416	Sap-r
MI147	MI147-RA	chr2	chr2	+	1242553	1249123	3.35	6.675	0.23	0.07	0.29	1.065	0.055	0.02	Fun	FBgn0015032	Cyp4c3
MI148	MI148-RA	chr2	chr2	+	1263370	1283431	3.75	3.455	3.08	2.17	4	1.855	0	0.21	Fun	FBgn0020912	Ptx1
MI149	MI149-RA	chr2	chr2	-	1288761	1290162	2.065	1.135	0.175	38.13	0.13	121.205	0	714.83	Fun	FBgn0039810	CG15549
MI150	MI150-RA	chr2	chr2	-	1300588	1301423	0	0	0	34.235	0	74.655	0	280.41	Fun	FBgn0261806	CG42752
MI150	MI150-RB	chr2	chr2	-	1300588	1301423	0	0	0	34.235	0	74.655	0	280.41	Fun	FBgn0261806	CG42752
MI151	MI151-RA	chr2	chr2	+	1313259	1317052	0	0.03	0	18.88	0	96.875	0	137.945	Dis	FBgn0039812	CG15548
MI151	MI151-RB	chr2	chr2	+	1313259	1317052	0	0.03	0	18.88	0	96.875	0	137.945	Dis	FBgn0039812	CG15548
MI152	MI152-RA	chr2	chr2	-	1318026	1319365	0	0	0	5.43	0	4.2	0	2.47	Fun	FBgn0062411	Ctr1C
MI153	MI153-RA	chr2	chr2	-	1323608	1376999	1.085	1.12	1.45	1.03	1.66	1.645	0.03	0.1	Fun	FBgn0004573	5-HT7
MI154	MI154-RA	chr2	chr2	-	1346982	1348090	0	0	0	1.29	0	2.635	0	3.985	Fun
MI155	MI155-RA	chr2	chr2	-	1349275	1350178	0.045	0.195	0	38.05	0	161.37	0.12	491.075	Dis	FBgn0051007	CG31007
MI156	MI156-RA	chr2	chr2	+	1354301	1356062	0	0	0	3.29	0	23.55	0	36.655	Fun	FBgn0051897	CG31897
MI157	MI157-RA	chr2	chr2	+	1392215	1406777	0.01	0	0	0.04	0	0.1	0	1.105	Fun	FBgn0053773	CG33773
MI158	MI158-RA	chr2	chr2	+	1409202	1417669	3.79	6.715	0.92	3.925	7.365	34.365	0.015	58.085	Fun	FBgn0010015	CanA1
MI159	MI159-RA	chr2	chr2	+	1418783	1422566	64.03	94.12	0.555	4.59	105.765	122.38	22.635	13.545	Fun	FBgn0016123	Alp4
MI160	MI160-RA	chr2	chr2	-	1422454	1423760	75.365	100.955	60.775	115.835	147.83	108.465	151.155	54.875	Fun	FBgn0010808	Chchd3
MI160	MI160-RB	chr2	chr2	-	1422478	1423760	75.365	100.955	60.775	115.835	147.83	108.465	151.155	54.875	Fun	FBgn0010808	Chchd3
MI161	MI161-RA	chr2	chr2	-	1424936	1433404	13.315	13.27	35.625	29.88	39.19	15.53	55.71	5.84	Fun	FBgn0002413	dco
MI161	MI161-RB	chr2	chr2	-	1424936	1433404	13.315	13.27	35.625	29.88	39.19	15.53	55.71	5.84	Fun	FBgn0002413	dco
MI161	MI161-RC	chr2	chr2	-	1425060	1430594	13.315	13.27	35.625	29.88	39.19	15.53	55.71	5.84	Fun	FBgn0002413	dco
MI161	MI161-RD	chr2	chr2	-	1425062	1433434	13.315	13.27	35.625	29.88	39.19	15.53	55.71	5.84	Fun	FBgn0002413	dco
MI161	MI161-RE	chr2	chr2	-	1425062	1433434	13.315	13.27	35.625	29.88	39.19	15.53	55.71	5.84	Fun	FBgn0002413	dco
MI162	MI162-RA	chr2	chr2	+	1437949	1439495	0.13	0.055	0.115	0.12	0.05	0.08	0	0.19	Sil	FBgn0024288	Sox100B
MI163	MI163-RA	chr2	chr2	-	1446674	1447568	0	0	0	0	0	0.07	0	0.085	Sil	FBgn0053920	CG33920
MI164	MI164-RA	chr2	chr2	-	1450073	1451535	0	0.025	0	3.135	0	4.18	0	7.775	Fun
MI165	MI165-RA	chr2	chr2	+	1450798	1452329	0.705	0.335	1.31	0.83	0.415	0.655	0	2.6	Dis	FBgn0024288	Sox100B
MI166	MI166-RA	chr2	chr2	-	1454881	1456533	0	0	0.21	0.05	0.075	2490.89	0.155	49.685	Fun	FBgn0033115	Spn42De
MI166	MI166-RB	chr2	chr2	-	1454881	1456533	0	0	0.21	0.05	0.075	2490.89	0.155	49.685	Fun	FBgn0033115	Spn42De
MI166	MI166-RC	chr2	chr2	-	1454881	1460955	0	0	0.21	0.05	0.075	2490.89	0.155	49.685	Fun	FBgn0033115	Spn42De
MI167	MI167-RA	chr2	chr2	+	1455212	1458642	0	0	0	0	0	6.03	0	0.055	Fun
MI167	MI167-RB	chr2	chr2	+	1455212	1458642	0	0	0	0	0	6.03	0	0.055	Fun
MI168	MI168-RA	chr2	chr2	-	1456757	1458292	0	0	0.06	0.08	0.025	231.7	0	2.515	Dis	FBgn0033115	Spn42De
MI168	MI168-RB	chr2	chr2	-	1456757	1458292	0	0	0.06	0.08	0.025	231.7	0	2.515	Dis	FBgn0033115	Spn42De
MI166	MI166-RD	chr2	chr2	-	1458684	1460955	0	0	0.21	0.05	0.075	2490.89	0.155	49.685	Fun	FBgn0033115	Spn42De
MI169	MI169-RA	chr2	chr2	-	1464971	1470602	0.255	0.4	6.075	3.16	1.585	1.38	0	0	Fun	FBgn0039816	CG11317
MI170	MI170-RA	chr2	chr2	-	1472356	1474748	0.075	0.02	0.02	0.055	0.485	0.385	0	0.065	Sil	FBgn0039817	CG15553
MI171	MI171-RA	chr2	chr2	+	1489638	1492429	8.685	4.835	1.85	0.93	3.315	0.89	4.12	0	Dis	FBgn0039818	CG11318
MI172	MI172-RA	chr2	chr2	+	1499835	1501122	0.03	0.33	0.07	0.46	0.03	3.325	0	7.48	Fun	FBgn0039820	CG15554
MI173	MI173-RA	chr2	chr2	-	1501558	1504364	0.5	0.43	13.895	5.485	2.35	1.595	0.12	0.045	Fun	FBgn0039821	CG15556
MI174	MI174-RA	chr2	chr2	+	1508226	1553142	0.105	0.16	0.98	0.55	1.705	1.86	0.01	0.255	Fun	FBgn0013973	Gycbeta100B
MI175	MI175-RA	chr2	chr2	-	1531908	1543574	0.705	0.915	2.875	10.875	4.8	13.405	0.2	17.815	Dis	FBgn0086704	stops
MI175	MI175-RB	chr2	chr2	-	1532150	1547173	0.705	0.915	2.875	10.875	4.8	13.405	0.2	17.815	Dis	FBgn0086704	stops
MI176	MI176-RA	chr2	chr2	-	1554377	1572599	31.23	29.275	9.96	5.24	23.535	8.5	0.42	0.025	Fun	FBgn0051004	mesh
MI177	MI177-RA	chr2	chr2	+	1573895	1581106	8.565	9.21	4.6	2.11	7.12	2.615	1.275	0.095	Fun	FBgn0039827	CG1544
MI178	MI178-RA	chr2	chr2	-	1581551	1587616	1.915	1.775	10.36	16.685	32.86	28.04	16.545	8.42	Fun	FBgn0267435	chp
MI178	MI178-RB	chr2	chr2	-	1581551	1587621	1.915	1.775	10.36	16.685	32.86	28.04	16.545	8.42	Fun	FBgn0267435	chp
MI178	MI178-RC	chr2	chr2	-	1581551	1590538	1.915	1.775	10.36	16.685	32.86	28.04	16.545	8.42	Fun	FBgn0267435	chp
MI178	MI178-RD	chr2	chr2	-	1588047	1590538	1.915	1.775	10.36	16.685	32.86	28.04	16.545	8.42	Fun	FBgn0267435	chp
MI179	MI179-RA	chr2	chr2	+	1590448	1591722	16.8	21.095	28.705	47.01	78.335	18.455	71.615	16.17	Fun	FBgn0039828	CG1542
MI180	MI180-RA	chr2	chr2	-	1591599	1592867	4.975	5.995	14.32	13.835	26.665	4.405	35.58	2.5	Fun	FBgn0039829	CG15561
MI181	MI181-RA	chr2	chr2	-	1593388	1598104	651.495	912.58	504.28	334.69	3361.05	2470.48	617.825	69.715	Fun	FBgn0039830	ATPsynC
MI181	MI181-RB	chr2	chr2	-	1593388	1598104	651.495	912.58	504.28	334.69	3361.05	2470.48	617.825	69.715	Fun	FBgn0039830	ATPsynC
MI181	MI181-RC	chr2	chr2	-	1593388	1598104	651.495	912.58	504.28	334.69	3361.05	2470.48	617.825	69.715	Fun	FBgn0039830	ATPsynC
MI181	MI181-RD	chr2	chr2	-	1593389	1597551	651.495	912.58	504.28	334.69	3361.05	2470.48	617.825	69.715	Fun	FBgn0039830	ATPsynC
MI181	MI181-RE	chr2	chr2	-	1593389	1597551	651.495	912.58	504.28	334.69	3361.05	2470.48	617.825	69.715	Fun	FBgn0039830	ATPsynC
MI182	MI182-RA	chr2	chr2	+	1593438	1596403	0.195	0.335	3.41	0.765	0.79	1.09	0.81	0.13	Fun
MI183	MI183-RA	chr2	chr2	+	1596970	1608204	18.325	14	25.06	20.93	29.705	11.955	46.155	8.9	Fun	FBgn0039831	CG12054
MI183	MI183-RB	chr2	chr2	+	1597526	1608195	18.325	14	25.06	20.93	29.705	11.955	46.155	8.9	Fun	FBgn0039831	CG12054
MI183	MI183-RC	chr2	chr2	+	1597526	1608202	18.325	14	25.06	20.93	29.705	11.955	46.155	8.9	Fun	FBgn0039831	CG12054
MI183	MI183-RD	chr2	chr2	+	1597526	1608204	18.325	14	25.06	20.93	29.705	11.955	46.155	8.9	Fun	FBgn0039831	CG12054
MI183	MI183-RE	chr2	chr2	+	1597695	1608853	18.325	14	25.06	20.93	29.705	11.955	46.155	8.9	Fun	FBgn0039831	CG12054
MI183	MI183-RF	chr2	chr2	+	1597736	1608204	18.325	14	25.06	20.93	29.705	11.955	46.155	8.9	Fun	FBgn0039831	CG12054
MI184	MI184-RA	chr2	chr2	-	1609162	1613210	4.11	4.045	12.42	20.11	8.57	13.265	11.865	10.98	Fun	FBgn0285911	Vps16A
MI184	MI184-RB	chr2	chr2	-	1609166	1613292	4.11	4.045	12.42	20.11	8.57	13.265	11.865	10.98	Fun	FBgn0285911	Vps16A
MI185	MI185-RA	chr2	chr2	+	1613140	1615362	21.43	21.095	25.265	32.19	29.795	21.565	35.05	10.775	Fun	FBgn0010803	TrpRS
MI185	MI185-RB	chr2	chr2	+	1613177	1615390	21.43	21.095	25.265	32.19	29.795	21.565	35.05	10.775	Fun	FBgn0010803	TrpRS
MI186	MI186-RA	chr2	chr2	+	1616067	1618014	9.505	8.965	0.335	1.75	0.325	1.595	0.025	3.59	Fun	FBgn0037672	sage
MI187	MI187-RA	chr2	chr2	-	1617904	1619703	309.305	287.385	99.73	125.535	226.445	150.24	152.9	76.44	Fun	FBgn0037671	ATP6AP2
MI188	MI188-RA	chr2	chr2	-	1619751	1621814	10.53	8.47	24.1	19.205	19.18	6.61	66.255	5.225	Fun	FBgn0037670	Ibf1
MI189	MI189-RA	chr2	chr2	+	1620871	1622812	8.395	6.995	32.64	35.31	12.415	50.495	65.665	229.635	Dis	FBgn0037668	CG16736
MI190	MI190-RA	chr2	chr2	-	1622277	1634817	2.685	3.03	12.93	14.58	11.48	11.365	29.25	15.3	Fun	FBgn0037667	CG16734
MI190	MI190-RB	chr2	chr2	-	1622277	1635574	2.685	3.03	12.93	14.58	11.48	11.365	29.25	15.3	Fun	FBgn0037667	CG16734
MI190	MI190-RC	chr2	chr2	-	1622303	1627986	2.685	3.03	12.93	14.58	11.48	11.365	29.25	15.3	Fun	FBgn0037667	CG16734
MI190	MI190-RD	chr2	chr2	-	1622303	1641972	2.685	3.03	12.93	14.58	11.48	11.365	29.25	15.3	Fun	FBgn0037667	CG16734
MI190	MI190-RE	chr2	chr2	-	1622362	1635580	2.685	3.03	12.93	14.58	11.48	11.365	29.25	15.3	Fun	FBgn0037667	CG16734
MI190	MI190-RF	chr2	chr2	-	1623949	1638789	2.685	3.03	12.93	14.58	11.48	11.365	29.25	15.3	Fun	FBgn0037667	CG16734
MI191	MI191-RA	chr2	chr2	+	1624591	1626497	7.09	7.97	28.78	60.14	31.25	28.185	402.04	72.185	Fun	FBgn0016034	mael
MI191	MI191-RB	chr2	chr2	+	1624591	1629869	7.09	7.97	28.78	60.14	31.25	28.185	402.04	72.185	Fun	FBgn0016034	mael
MI191	MI191-RC	chr2	chr2	+	1624591	1633240	7.09	7.97	28.78	60.14	31.25	28.185	402.04	72.185	Fun	FBgn0016034	mael
MI191	MI191-RD	chr2	chr2	+	1624591	1643746	7.09	7.97	28.78	60.14	31.25	28.185	402.04	72.185	Fun	FBgn0016034	mael
MI191	MI191-RE	chr2	chr2	+	1624591	1643746	7.09	7.97	28.78	60.14	31.25	28.185	402.04	72.185	Fun	FBgn0016034	mael
MI191	MI191-RF	chr2	chr2	+	1624597	1633236	7.09	7.97	28.78	60.14	31.25	28.185	402.04	72.185	Fun	FBgn0016034	mael
MI191	MI191-RG	chr2	chr2	+	1624597	1633242	7.09	7.97	28.78	60.14	31.25	28.185	402.04	72.185	Fun	FBgn0016034	mael
MI191	MI191-RH	chr2	chr2	+	1624597	1643746	7.09	7.97	28.78	60.14	31.25	28.185	402.04	72.185	Fun	FBgn0016034	mael
MI191	MI191-RI	chr2	chr2	+	1624615	1643749	7.09	7.97	28.78	60.14	31.25	28.185	402.04	72.185	Fun	FBgn0016034	mael
MI190	MI190-RG	chr2	chr2	-	1626366	1634817	2.685	3.03	12.93	14.58	11.48	11.365	29.25	15.3	Fun	FBgn0037667	CG16734
MI191	MI191-RJ	chr2	chr2	+	1634887	1643749	7.09	7.97	28.78	60.14	31.25	28.185	402.04	72.185	Fun	FBgn0016034	mael
MI191	MI191-RK	chr2	chr2	+	1635748	1643746	7.09	7.97	28.78	60.14	31.25	28.185	402.04	72.185	Fun	FBgn0016034	mael
MI191	MI191-RL	chr2	chr2	+	1635809	1643749	7.09	7.97	28.78	60.14	31.25	28.185	402.04	72.185	Fun	FBgn0016034	mael
MI191	MI191-RM	chr2	chr2	+	1636233	1643746	7.09	7.97	28.78	60.14	31.25	28.185	402.04	72.185	Fun	FBgn0016034	mael
MI191	MI191-RN	chr2	chr2	+	1636233	1643746	7.09	7.97	28.78	60.14	31.25	28.185	402.04	72.185	Fun	FBgn0016034	mael
MI190	MI190-RH	chr2	chr2	-	1637843	1638954	2.685	3.03	12.93	14.58	11.48	11.365	29.25	15.3	Fun	FBgn0037667	CG16734
MI190	MI190-RI	chr2	chr2	-	1637845	1638789	2.685	3.03	12.93	14.58	11.48	11.365	29.25	15.3	Fun	FBgn0037667	CG16734
MI191	MI191-RO	chr2	chr2	+	1639483	1643748	7.09	7.97	28.78	60.14	31.25	28.185	402.04	72.185	Fun	FBgn0016034	mael
MI191	MI191-RP	chr2	chr2	+	1639806	1643748	7.09	7.97	28.78	60.14	31.25	28.185	402.04	72.185	Fun	FBgn0016034	mael
MI191	MI191-RQ	chr2	chr2	+	1641952	1643749	7.09	7.97	28.78	60.14	31.25	28.185	402.04	72.185	Fun	FBgn0016034	mael
MI192	MI192-RA	chr2	chr2	-	1645120	1648762	3.985	2.835	13.69	9.175	7.76	7.09	19.575	8.06	Fun	FBgn0037664	CG8420
MI192	MI192-RB	chr2	chr2	-	1645120	1649808	3.985	2.835	13.69	9.175	7.76	7.09	19.575	8.06	Fun	FBgn0037664	CG8420
MI193	MI193-RA	chr2	chr2	+	1649859	1654893	4.58	4.855	6.19	11.455	5.95	7.645	4.075	4.62	Fun	FBgn0260935	Vps15
MI194	MI194-RA	chr2	chr2	+	1655476	1661920	18.13	9.43	45.68	68.205	16.925	19.93	71.055	11.635	Fun	FBgn0015625	CycB3
MI195	MI195-RA	chr2	chr2	-	1657759	1660689	51.695	26.55	37.17	23.955	9.52	4.53	0.08	0.07	Fun	FBgn0013949	Elal
MI196	MI196-RA	chr2	chr2	-	1661306	1663142	10.52	6.3	4.035	2.05	3.475	1.765	0.025	0.065	Fun	FBgn0039238	CG7016
MI197	MI197-RA	chr2	chr2	+	1663670	1664212	0	0.59	60.38	120.045	0	0.085	0	0	Fun	FBgn0039237	CG13640
MI198	MI198-RA	chr2	chr2	+	1665869	1666311	0.635	0.28	24.515	32.745	3.945	0	1.09	0.295	Dis	FBgn0265266	CG13639
MI199	MI199-RA	chr2	chr2	+	1667532	1672049	0.07	0.09	0.33	3.01	3.43	18.04	5.13	29.055	Fun	FBgn0051119	HDAC11
MI199	MI199-RB	chr2	chr2	+	1668928	1672049	0.07	0.09	0.33	3.01	3.43	18.04	5.13	29.055	Fun	FBgn0051119	HDAC11
MI200	MI200-RA	chr2	chr2	-	1671582	1676241	9.68	9.845	29.045	31.295	21.97	16.21	40.54	13.045	Fun	FBgn0039234	Nct
MI201	MI201-RA	chr2	chr2	-	1676493	1680941	9.185	6.69	7.035	6.415	29.02	18.995	32.125	3.915	Fun	FBgn0067783	DPCoAC
MI201	MI201-RB	chr2	chr2	-	1676493	1680942	9.185	6.69	7.035	6.415	29.02	18.995	32.125	3.915	Fun	FBgn0067783	DPCoAC
MI202	MI202-RA	chr2	chr2	-	1681354	1685385	0.305	1.24	0.82	38.565	7.095	50.135	12.48	46.165	Fun	FBgn0036892	Lon
MI203	MI203-RA	chr2	chr2	+	1685015	1687205	4.415	3.935	13.545	17.355	6.3	6.725	25.425	6.535	Fun	FBgn0043457	CG5180
MI204	MI204-RA	chr2	chr2	-	1687024	1687665	9.105	10.25	14.57	30.625	26.78	56.91	49.98	103.27	Fun	FBgn0040575	CG15922
MI205	MI205-RA	chr2	chr2	+	1687734	1700211	35.81	31.245	62.27	73.4	79.275	63.955	147.395	65.96	Fun	FBgn0038803	CG5191
MI205	MI205-RB	chr2	chr2	+	1687734	1704774	35.81	31.245	62.27	73.4	79.275	63.955	147.395	65.96	Fun	FBgn0038803	CG5191
MI206	MI206-RA	chr2	chr2	-	1687961	1690324	8.12	9.3	2.735	10.245	2.945	4.525	3.42	5.825	Fun	FBgn0038804	CG10877
MI205	MI205-RC	chr2	chr2	+	1687971	1700207	35.81	31.245	62.27	73.4	79.275	63.955	147.395	65.96	Fun	FBgn0038803	CG5191
MI205	MI205-RD	chr2	chr2	+	1701606	1704774	35.81	31.245	62.27	73.4	79.275	63.955	147.395	65.96	Fun	FBgn0038803	CG5191
MI205	MI205-RE	chr2	chr2	+	1701655	1708396	35.81	31.245	62.27	73.4	79.275	63.955	147.395	65.96	Fun	FBgn0038803	CG5191
MI207	MI207-RA	chr2	chr2	-	1702343	1703774	12.815	13.385	21.755	35.575	34.13	22.86	46.205	11.125	Fun	FBgn0038805	TFAM
MI208	MI208-RA	chr2	chr2	-	1704774	1706713	53.34	52.545	102.455	121.2	120.115	92.72	164.695	94.59	Fun	FBgn0023212	EloB
MI205	MI205-RF	chr2	chr2	+	1707014	1708391	35.81	31.245	62.27	73.4	79.275	63.955	147.395	65.96	Fun	FBgn0038803	CG5191
MI205	MI205-RG	chr2	chr2	+	1707327	1708348	35.81	31.245	62.27	73.4	79.275	63.955	147.395	65.96	Fun	FBgn0038803	CG5191
MI209	MI209-RA	chr2	chr2	-	1708222	1709397	2.58	2.16	5.63	7.775	9.085	4.665	22.145	5.77	Fun	FBgn0054008	CG34008
MI210	MI210-RA	chr2	chr2	-	1709810	1713357	20.795	17.165	28.225	35.72	40.03	28.94	68.09	21.555	Fun	FBgn0038809	CG16953
MI210	MI210-RB	chr2	chr2	-	1709810	1713357	20.795	17.165	28.225	35.72	40.03	28.94	68.09	21.555	Fun	FBgn0038809	CG16953
MI211	MI211-RA	chr2	chr2	-	1713431	1715497	38.3	32.43	116.125	112.445	46	28.24	54.715	19.65	Fun	FBgn0014029	44441
MI212	MI212-RA	chr2	chr2	+	1715615	1718045	23.16	24.25	31.75	51.495	35.06	22.125	47.015	14.995	Fun	FBgn0038810	Srp72
MI213	MI213-RA	chr2	chr2	-	1717970	1720194	4.76	5.75	6.035	18.785	22.565	9.23	55.19	9.31	Fun	FBgn0038811	Pus1
MI213	MI213-RB	chr2	chr2	-	1717970	1720207	4.76	5.75	6.035	18.785	22.565	9.23	55.19	9.31	Fun	FBgn0038811	Pus1
MI213	MI213-RC	chr2	chr2	-	1717974	1720071	4.76	5.75	6.035	18.785	22.565	9.23	55.19	9.31	Fun	FBgn0038811	Pus1
MI213	MI213-RD	chr2	chr2	-	1717984	1719777	4.76	5.75	6.035	18.785	22.565	9.23	55.19	9.31	Fun	FBgn0038811	Pus1
MI214	MI214-RA	chr2	chr2	+	1719877	1741189	2.5	3.46	13.135	13.64	8.68	4.935	15.1	2.905	Fun	FBgn0023097	bon
MI214	MI214-RB	chr2	chr2	+	1719877	1741530	2.5	3.46	13.135	13.64	8.68	4.935	15.1	2.905	Fun	FBgn0023097	bon
MI214	MI214-RC	chr2	chr2	+	1719882	1741184	2.5	3.46	13.135	13.64	8.68	4.935	15.1	2.905	Fun	FBgn0023097	bon
MI214	MI214-RD	chr2	chr2	+	1719886	1741184	2.5	3.46	13.135	13.64	8.68	4.935	15.1	2.905	Fun	FBgn0023097	bon
MI215	MI215-RA	chr2	chr2	-	1744814	1747057	0	0.09	0.24	0.44	0.18	12.9	0.045	0.845	Dis	FBgn0038069	CG11608
MI216	MI216-RA	chr2	chr2	-	1747129	1751746	22.075	18.74	39.34	54.085	35.74	44.7	44.095	62.48	Fun	FBgn0260444	Not10
MI217	MI217-RA	chr2	chr2	+	1753162	1757108	179.61	197.05	48.765	68.48	224.8	153.855	88.885	77.255	Fun	FBgn0005671	Vha55
MI217	MI217-RB	chr2	chr2	+	1753162	1757128	179.61	197.05	48.765	68.48	224.8	153.855	88.885	77.255	Fun	FBgn0005671	Vha55
MI218	MI218-RA	chr2	chr2	+	1785424	1830914	2.975	4.025	0.82	0.915	4.73	6.145	2.05	3.22	Dis	FBgn0038063	Octbeta2R
MI218	MI218-RB	chr2	chr2	+	1823317	1830914	2.975	4.025	0.82	0.915	4.73	6.145	2.05	3.22	Dis	FBgn0038063	Octbeta2R
MI219	MI219-RA	chr2	chr2	-	1852239	1854807	5.545	7.3	1.12	1.365	3.465	3.925	0	0.045	Fun	FBgn0028374	Hug
MI220	MI220-RA	chr2	chr2	+	1868425	1871169	1.94	3.72	2.895	1.175	7.43	5.05	0.175	0.46	Fun	FBgn0038674	CG14285
MI221	MI221-RA	chr2	chr2	-	1871102	1873792	10.93	13.01	15.545	27.345	28.15	15.465	54.345	16.84	Fun	FBgn0260779	GatA
MI222	MI222-RA	chr2	chr2	+	1872263	1872966	136.18	161.835	98.03	110.44	409.865	294.43	166.545	44.72	Fun	FBgn0027785	NP15.6
MI223	MI223-RA	chr2	chr2	+	1873799	1875197	19.245	19.08	19.78	28.555	42.675	21.39	68.905	15.08	Fun	FBgn0015781	P5cr
MI224	MI224-RA	chr2	chr2	-	1874893	1877045	2.495	2.875	6.075	15.135	3.855	10	6.64	10.415	Fun	FBgn0027784	Prp18
MI224	MI224-RB	chr2	chr2	-	1875105	1877344	2.495	2.875	6.075	15.135	3.855	10	6.64	10.415	Fun	FBgn0027784	Prp18
MI224	MI224-RC	chr2	chr2	-	1875105	1877344	2.495	2.875	6.075	15.135	3.855	10	6.64	10.415	Fun	FBgn0027784	Prp18
MI225	MI225-RA	chr2	chr2	+	1876326	1879589	2.315	2.165	3.72	7.65	5.21	4.79	14.2	3.465	Fun	FBgn0027518	Wdr24
MI226	MI226-RA	chr2	chr2	-	1879248	1881403	42.28	41.735	19.365	30.135	40.84	19.095	27.695	3.985	Fun	FBgn0039690	Gnpnat
MI226	MI226-RB	chr2	chr2	-	1879248	1881409	42.28	41.735	19.365	30.135	40.84	19.095	27.695	3.985	Fun	FBgn0039690	Gnpnat
MI226	MI226-RC	chr2	chr2	-	1879248	1881432	42.28	41.735	19.365	30.135	40.84	19.095	27.695	3.985	Fun	FBgn0039690	Gnpnat
MI227	MI227-RA	chr2	chr2	-	1881485	1882614	22.095	22.65	13.345	26.46	38.95	29.82	26.94	7.175	Fun	FBgn0039689	CIA30
MI228	MI228-RA	chr2	chr2	+	1882631	1884369	14.47	13.055	8.265	20.13	27.955	28.13	44.575	25.795	Fun	FBgn0027583	CG7601
MI229	MI229-RA	chr2	chr2	-	1883929	1896329	6.93	6.125	14.935	27.01	9.87	62.83	49.745	278.43	Fun	FBgn0039688	Kul
MI229	MI229-RB	chr2	chr2	-	1883979	1893991	6.93	6.125	14.935	27.01	9.87	62.83	49.745	278.43	Fun	FBgn0039688	Kul
MI230	MI230-RA	chr2	chr2	+	1885159	1897210	5.28	4.3	11.5	11.39	9.38	8.69	297.785	17.755	Fun	FBgn0039687	Naa40
MI230	MI230-RB	chr2	chr2	+	1885159	1897232	5.28	4.3	11.5	11.39	9.38	8.69	297.785	17.755	Fun	FBgn0039687	Naa40
MI229	MI229-RC	chr2	chr2	-	1894330	1896327	6.93	6.125	14.935	27.01	9.87	62.83	49.745	278.43	Fun	FBgn0039688	Kul
MI231	MI231-RA	chr2	chr2	-	1897141	1898103	124.68	77.915	141.92	104.015	30.535	28.135	17.545	18.855	Fun	FBgn0024841	Pcd
MI231	MI231-RB	chr2	chr2	-	1897141	1898103	124.68	77.915	141.92	104.015	30.535	28.135	17.545	18.855	Fun	FBgn0024841	Pcd
MI231	MI231-RC	chr2	chr2	-	1897141	1898660	124.68	77.915	141.92	104.015	30.535	28.135	17.545	18.855	Fun	FBgn0024841	Pcd
MI231	MI231-RD	chr2	chr2	-	1897143	1898094	124.68	77.915	141.92	104.015	30.535	28.135	17.545	18.855	Fun	FBgn0024841	Pcd
MI232	MI232-RA	chr2	chr2	-	1898836	1902098	0.25	0.2	0.875	1.605	2.235	2.09	0.025	0	Fun	FBgn0039686	CG15506
MI233	MI233-RA	chr2	chr2	-	1902756	1903701	0.09	0	0	0.23	0.045	0	0.08	0	Sil-Dis	FBgn0000119	arr
MI234	MI234-RA	chr2	chr2	+	1904130	1904794	17382.8	30024.5	17368	16564.2	325.7	810.215	0.28	7.08	Fun	FBgn0039685	Obp99b
MI235	MI235-RA	chr2	chr2	-	1904142	1904740	0.695	2.56	81.13	26.265	0.235	0.165	0	0.2	Dis
MI236	MI236-RA	chr2	chr2	-	1923461	1924120	0.73	0.96	1.83	1.245	0	0	0	0	Dis	FBgn0039683	dmrt99B
MI237	MI237-RA	chr2	chr2	+	1934147	1934834	4275.05	2353.14	6913.61	3770.85	1548.58	1211.12	18.185	266.105	Fun	FBgn0039682	Obp99c
MI238	MI238-RA	chr2	chr2	-	1934189	1938165	0.825	0.915	6.59	3.33	4.11	4.575	0	0.025	Fun	FBgn0013972	Gycalpha99B
MI239	MI239-RA	chr2	chr2	+	1938467	1940903	2.145	3	5.2	4.37	5.2	2.585	1.295	0.57	Fun	FBgn0039681	CG7582
MI240	MI240-RA	chr2	chr2	+	1941257	1945417	5.445	5.8	17.63	19.705	8.635	4.935	21.73	4.425	Fun	FBgn0025457	Bub3
MI241	MI241-RA	chr2	chr2	-	1944379	1945065	121.035	326.47	409.435	503.74	0.41	248.76	0.325	780.19	Fun	FBgn0039678	Obp99a
MI242	MI242-RA	chr2	chr2	-	1945558	1946599	0.09	0.105	0.425	1.835	0	2.6	0.07	6.045	Fun	FBgn0039677	ppk30
MI243	MI243-RA	chr2	chr2	+	1947564	1949573	0	0	0.145	0.035	0	0	0	0.05	Sil	FBgn0039676	ppk20
MI244	MI244-RA	chr2	chr2	-	1949702	1953423	0.01	0	0.315	0.12	0.03	0	0.045	0	Sil	FBgn0039675	ppk21
MI245	MI245-RA	chr2	chr2	+	1953554	1955565	0.02	0.025	0	0.175	0.04	0.155	0.025	0.17	Sil	FBgn0039676	ppk20
MI246	MI246-RA	chr2	chr2	-	1955688	1962113	0.025	0	0.2	0.275	0.01	0.33	0.025	0.53	Sil	FBgn0039675	ppk21
MI247	MI247-RA	chr2	chr2	+	1962458	1988301	0.115	0.14	0.465	1.55	0.37	3.265	0	2.665	Fun	FBgn0266137	Dop1R2
MI248	MI248-RA	chr2	chr2	-	1976838	1980680	0	0.01	0.01	1.04	0.01	3.525	0	5.06	Fun
MI249	MI249-RA	chr2	chr2	-	1998380	2000594	42.91	55.845	41.07	32.63	71.255	55.895	29.84	36.55	Fun	FBgn0039674	CG1907
MI250	MI250-RA	chr2	chr2	-	2018463	2028109	19.43	23.035	45.315	46.6	42.14	32.68	61.06	21.665	Fun	FBgn0086361	alph
MI250	MI250-RB	chr2	chr2	-	2018463	2028159	19.43	23.035	45.315	46.6	42.14	32.68	61.06	21.665	Fun	FBgn0086361	alph
MI250	MI250-RC	chr2	chr2	-	2020405	2028159	19.43	23.035	45.315	46.6	42.14	32.68	61.06	21.665	Fun	FBgn0086361	alph
MI251	MI251-RA	chr2	chr2	+	2027684	2030377	4.41	4.74	13.22	29.195	4.98	17.6	8.405	22.22	Fun	FBgn0027784	Prp18
MI252	MI252-RA	chr2	chr2	-	2030073	2031341	2.725	5.045	19.06	12.105	4.415	4.235	0	2.065	Fun	FBgn0015781	P5cr
MI253	MI253-RA	chr2	chr2	-	2031916	2034486	1.605	2.04	1.815	3.54	3.67	3.135	1.72	2.505	Dis	FBgn0000119	arr
MI253	MI253-RB	chr2	chr2	-	2031933	2034486	1.605	2.04	1.815	3.54	3.67	3.135	1.72	2.505	Dis	FBgn0000119	arr
MI254	MI254-RA	chr2	chr2	+	2034750	2035582	18.455	37.56	0	0.115	0	0.825	0	1.04	Fun	FBgn0051041	CG31041
MI255	MI255-RA	chr2	chr2	+	2035924	2036728	575.565	396.79	0.065	0.06	0	0	0	0	Fun	FBgn0039671	CG11470
MI256	MI256-RA	chr2	chr2	+	2037664	2038495	428.815	267.8	0.06	0.16	0	0	0	0	Fun	FBgn0039670	CG7567
MI256	MI256-RB	chr2	chr2	+	2037664	2038568	428.815	267.8	0.06	0.16	0	0	0	0	Fun	FBgn0039670	CG7567
MI257	MI257-RA	chr2	chr2	-	2061870	2071863	4.765	5.31	22.895	15.425	4.31	2.045	0	0.055	Fun	FBgn0000492	Dr
MI258	MI258-RA	chr2	chr2	-	2113436	2114484	0.075	1.595	0.225	79.405	0.075	59.84	0	133.44	Fun	FBgn0039669	ND-20L
MI259	MI259-RA	chr2	chr2	+	2124152	2132567	11.145	10.85	16.63	44	18.555	90.905	35.54	82.61	Fun	FBgn0039668	Trc8
MI259	MI259-RB	chr2	chr2	+	2124152	2132576	11.145	10.85	16.63	44	18.555	90.905	35.54	82.61	Fun	FBgn0039668	Trc8
MI259	MI259-RC	chr2	chr2	+	2126244	2132576	11.145	10.85	16.63	44	18.555	90.905	35.54	82.61	Fun	FBgn0039668	Trc8
MI259	MI259-RD	chr2	chr2	+	2127967	2132576	11.145	10.85	16.63	44	18.555	90.905	35.54	82.61	Fun	FBgn0039668	Trc8
MI260	MI260-RA	chr2	chr2	-	2132195	2135079	6.91	10.41	1.86	1.39	24.89	23.145	0.9	2.965	Fun	FBgn0039667	FipoQ
MI260	MI260-RB	chr2	chr2	-	2132461	2137259	6.91	10.41	1.86	1.39	24.89	23.145	0.9	2.965	Fun	FBgn0039667	FipoQ
MI261	MI261-RA	chr2	chr2	+	2137420	2139108	12.855	10.78	60.875	59.255	11.34	17.565	18.285	18.855	Fun	FBgn0039665	CG2310
MI261	MI261-RB	chr2	chr2	+	2137420	2139774	12.855	10.78	60.875	59.255	11.34	17.565	18.285	18.855	Fun	FBgn0039665	CG2310
MI261	MI261-RC	chr2	chr2	+	2137420	2139774	12.855	10.78	60.875	59.255	11.34	17.565	18.285	18.855	Fun	FBgn0039665	CG2310
MI261	MI261-RD	chr2	chr2	+	2137486	2139727	12.855	10.78	60.875	59.255	11.34	17.565	18.285	18.855	Fun	FBgn0039665	CG2310
MI261	MI261-RE	chr2	chr2	+	2137486	2139774	12.855	10.78	60.875	59.255	11.34	17.565	18.285	18.855	Fun	FBgn0039665	CG2310
MI261	MI261-RF	chr2	chr2	+	2137494	2139108	12.855	10.78	60.875	59.255	11.34	17.565	18.285	18.855	Fun	FBgn0039665	CG2310
MI262	MI262-RA	chr2	chr2	+	2139872	2140575	95.585	100.745	127.54	125.325	93.93	204.085	190.675	271.985	Fun	FBgn0040623	Spase12
MI263	MI263-RA	chr2	chr2	-	2139943	2141545	5.96	5.9	8.91	11.63	9.24	6.38	21.505	3.87	Fun	FBgn0039664	CG2006
MI263	MI263-RB	chr2	chr2	-	2140128	2141493	5.96	5.9	8.91	11.63	9.24	6.38	21.505	3.87	Fun	FBgn0039664	CG2006
MI264	MI264-RA	chr2	chr2	+	2141596	2144016	0.55	0.75	1.985	2.835	2.145	1.195	5.42	1.15	Fun	FBgn0039663	CG2321
MI265	MI265-RA	chr2	chr2	-	2143744	2152324	2.945	3.465	17.695	33.44	11.06	31.685	11.37	27.155	Dis	FBgn0004369	Ptp99A
MI265	MI265-RB	chr2	chr2	-	2143744	2176859	2.945	3.465	17.695	33.44	11.06	31.685	11.37	27.155	Dis	FBgn0004369	Ptp99A
MI265	MI265-RC	chr2	chr2	-	2143745	2152345	2.945	3.465	17.695	33.44	11.06	31.685	11.37	27.155	Dis	FBgn0004369	Ptp99A
MI265	MI265-RD	chr2	chr2	-	2143745	2176869	2.945	3.465	17.695	33.44	11.06	31.685	11.37	27.155	Dis	FBgn0004369	Ptp99A
MI265	MI265-RE	chr2	chr2	-	2143752	2257150	2.945	3.465	17.695	33.44	11.06	31.685	11.37	27.155	Dis	FBgn0004369	Ptp99A
MI265	MI265-RF	chr2	chr2	-	2154662	2257152	2.945	3.465	17.695	33.44	11.06	31.685	11.37	27.155	Dis	FBgn0004369	Ptp99A
MI266	MI266-RA	chr2	chr2	+	2254155	2255557	0	0	0	0.75	0	2.595	0	3.61	Fun
MI267	MI267-RA	chr2	chr2	+	2286849	2288148	0	0	0.03	0.055	0	11.11	0	167.605	Fun
MI268	MI268-RA	chr2	chr2	-	2296359	2304893	0	0	0	0.42	0.8	0.405	0.875	0.97	Fun
MI269	MI269-RA	chr2	chr2	+	2327554	2329337	0	0.025	0.025	0.045	0	0.075	0	0.13	Sil	FBgn0038733	CG11407
MI270	MI270-RA	chr2	chr2	+	2329401	2335062	24.915	31.16	104.955	121.055	66.68	115.56	52.295	68.04	Fun	FBgn0015622	Cnx99A
MI270	MI270-RB	chr2	chr2	+	2329519	2335062	24.915	31.16	104.955	121.055	66.68	115.56	52.295	68.04	Fun	FBgn0015622	Cnx99A
MI270	MI270-RC	chr2	chr2	+	2330918	2335062	24.915	31.16	104.955	121.055	66.68	115.56	52.295	68.04	Fun	FBgn0015622	Cnx99A
MI271	MI271-RA	chr2	chr2	-	2384088	2406193	0	0	0.025	0	0	0	0	0	Sil
MI272	MI272-RA	chr2	chr2	+	2407538	2411656	6.945	6.21	90.625	33.55	9.035	0.095	54.53	0.09	Fun	FBgn0003525	stg
MI273	MI273-RA	chr2	chr2	-	2412116	2413113	0	0.09	0.225	0.075	0.115	0.045	0	0	Sil
MI274	MI274-RA	chr2	chr2	+	2414243	2420319	21.25	18.82	176.89	111.57	25.86	55.44	4.585	29.96	Fun	FBgn0263236	SP1029
MI275	MI275-RA	chr2	chr2	+	2420496	2425735	0	0	0.045	0.02	0	9.29	0	2.41	Dis	FBgn0051445	CG31445
MI275	MI275-RB	chr2	chr2	+	2420496	2425735	0	0	0.045	0.02	0	9.29	0	2.41	Dis	FBgn0051445	CG31445
MI276	MI276-RA	chr2	chr2	-	2423878	2430802	4.715	4.53	8	15.32	10.29	36.365	24.05	33.1	Fun	FBgn0028476	Usp1
MI276	MI276-RB	chr2	chr2	-	2423915	2430826	4.715	4.53	8	15.32	10.29	36.365	24.05	33.1	Fun	FBgn0028476	Usp1
MI276	MI276-RC	chr2	chr2	-	2423915	2430846	4.715	4.53	8	15.32	10.29	36.365	24.05	33.1	Fun	FBgn0028476	Usp1
MI276	MI276-RD	chr2	chr2	-	2423927	2429818	4.715	4.53	8	15.32	10.29	36.365	24.05	33.1	Fun	FBgn0028476	Usp1
MI276	MI276-RE	chr2	chr2	-	2423931	2430809	4.715	4.53	8	15.32	10.29	36.365	24.05	33.1	Fun	FBgn0028476	Usp1
MI276	MI276-RF	chr2	chr2	-	2423931	2430846	4.715	4.53	8	15.32	10.29	36.365	24.05	33.1	Fun	FBgn0028476	Usp1
MI276	MI276-RG	chr2	chr2	-	2423937	2429625	4.715	4.53	8	15.32	10.29	36.365	24.05	33.1	Fun	FBgn0028476	Usp1
MI276	MI276-RH	chr2	chr2	-	2423940	2429820	4.715	4.53	8	15.32	10.29	36.365	24.05	33.1	Fun	FBgn0028476	Usp1
MI277	MI277-RA	chr2	chr2	+	2430621	2433419	795.72	814.185	908.32	802.09	714.98	231.625	429.675	108.99	Fun	FBgn0029176	eEF1gamma
MI277	MI277-RB	chr2	chr2	+	2430704	2433418	795.72	814.185	908.32	802.09	714.98	231.625	429.675	108.99	Fun	FBgn0029176	eEF1gamma
MI278	MI278-RA	chr2	chr2	-	2433417	2434750	85.655	107.07	72.53	65.735	182.545	90.22	374.29	44.185	Fun	FBgn0062442	Cisd2
MI279	MI279-RA	chr2	chr2	+	2434251	2437662	3.35	3.86	11.635	28.075	7.225	14.97	13.87	10.595	Fun	FBgn0039654	Brd8
MI279	MI279-RB	chr2	chr2	+	2434372	2437663	3.35	3.86	11.635	28.075	7.225	14.97	13.87	10.595	Fun	FBgn0039654	Brd8
MI280	MI280-RA	chr2	chr2	+	2455220	2456603	0	4.29	0.36	41.14	0.025	12.665	0.07	18.175	Dis	FBgn0039651	Cyt-c1L
MI281	MI281-RA	chr2	chr2	+	2457093	2458347	7.945	7.16	8.49	12.21	10.355	7.245	8.95	3.475	Fun	FBgn0039650	Mesh1
MI281	MI281-RB	chr2	chr2	+	2457261	2458380	7.945	7.16	8.49	12.21	10.355	7.245	8.95	3.475	Fun	FBgn0039650	Mesh1
MI282	MI282-RA	chr2	chr2	-	2458324	2460007	26.18	18.515	181.19	128.57	73.15	22.06	61.63	3.86	Fun	FBgn0014427	CG11899
MI283	MI283-RA	chr2	chr2	+	2465163	2487164	0.385	0.555	7.375	4.47	8.045	8.115	0.03	0.045	Fun	FBgn0039647	jus
MI283	MI283-RB	chr2	chr2	+	2465163	2487164	0.385	0.555	7.375	4.47	8.045	8.115	0.03	0.045	Fun	FBgn0039647	jus
MI283	MI283-RC	chr2	chr2	+	2465349	2487162	0.385	0.555	7.375	4.47	8.045	8.115	0.03	0.045	Fun	FBgn0039647	jus
MI283	MI283-RD	chr2	chr2	+	2465351	2487164	0.385	0.555	7.375	4.47	8.045	8.115	0.03	0.045	Fun	FBgn0039647	jus
MI284	MI284-RA	chr2	chr2	-	2486489	2491971	2.725	2.51	0.01	0.01	2.845	0.67	0	0	Fun	FBgn0039645	CG11898
MI285	MI285-RA	chr2	chr2	-	2492526	2503688	1.835	1.555	3.485	3.665	45.84	2.67	61.705	0.455	Fun	FBgn0039644	rdog
MI285	MI285-RB	chr2	chr2	-	2492526	2508171	1.835	1.555	3.485	3.665	45.84	2.67	61.705	0.455	Fun	FBgn0039644	rdog
MI285	MI285-RC	chr2	chr2	-	2492526	2508171	1.835	1.555	3.485	3.665	45.84	2.67	61.705	0.455	Fun	FBgn0039644	rdog
MI286	MI286-RA	chr2	chr2	-	2509259	2513923	0.125	0.175	1.665	0.97	2.065	1.74	0.05	0.035	Fun
MI287	MI287-RA	chr2	chr2	+	2547004	2557402	31.555	34.775	35.075	64.54	56.195	107.855	35.32	74.565	Fun	FBgn0039213	atl
MI288	MI288-RA	chr2	chr2	-	2549033	2554265	3.86	3.92	9.835	10.335	4.005	2.655	1.77	2.41	Fun	FBgn0046685	Wsck
MI287	MI287-RB	chr2	chr2	+	2550042	2557400	31.555	34.775	35.075	64.54	56.195	107.855	35.32	74.565	Fun	FBgn0039213	atl
MI287	MI287-RC	chr2	chr2	+	2553340	2557402	31.555	34.775	35.075	64.54	56.195	107.855	35.32	74.565	Fun	FBgn0039213	atl
MI287	MI287-RD	chr2	chr2	+	2553340	2557472	31.555	34.775	35.075	64.54	56.195	107.855	35.32	74.565	Fun	FBgn0039213	atl
MI287	MI287-RE	chr2	chr2	+	2553561	2557400	31.555	34.775	35.075	64.54	56.195	107.855	35.32	74.565	Fun	FBgn0039213	atl
MI289	MI289-RA	chr2	chr2	-	2557370	2573882	2.055	2.73	7.235	19.935	5.25	24.36	6.23	146.3	Fun	FBgn0039214	puf
MI289	MI289-RB	chr2	chr2	-	2557539	2573991	2.055	2.73	7.235	19.935	5.25	24.36	6.23	146.3	Fun	FBgn0039214	puf
MI289	MI289-RC	chr2	chr2	-	2558211	2573882	2.055	2.73	7.235	19.935	5.25	24.36	6.23	146.3	Fun	FBgn0039214	puf
MI289	MI289-RD	chr2	chr2	-	2558211	2573882	2.055	2.73	7.235	19.935	5.25	24.36	6.23	146.3	Fun	FBgn0039214	puf
MI289	MI289-RE	chr2	chr2	-	2558449	2573920	2.055	2.73	7.235	19.935	5.25	24.36	6.23	146.3	Fun	FBgn0039214	puf
MI289	MI289-RF	chr2	chr2	-	2558449	2575406	2.055	2.73	7.235	19.935	5.25	24.36	6.23	146.3	Fun	FBgn0039214	puf
MI289	MI289-RG	chr2	chr2	-	2558460	2573655	2.055	2.73	7.235	19.935	5.25	24.36	6.23	146.3	Fun	FBgn0039214	puf
MI289	MI289-RH	chr2	chr2	-	2558460	2573967	2.055	2.73	7.235	19.935	5.25	24.36	6.23	146.3	Fun	FBgn0039214	puf
MI290	MI290-RA	chr2	chr2	+	2573690	2577808	21.855	24.51	44.58	54.155	19.835	18.36	12.83	8.02	Fun	FBgn0000139	ash2
MI290	MI290-RB	chr2	chr2	+	2573838	2577802	21.855	24.51	44.58	54.155	19.835	18.36	12.83	8.02	Fun	FBgn0000139	ash2
MI290	MI290-RC	chr2	chr2	+	2573838	2577802	21.855	24.51	44.58	54.155	19.835	18.36	12.83	8.02	Fun	FBgn0000139	ash2
MI290	MI290-RD	chr2	chr2	+	2575989	2577808	21.855	24.51	44.58	54.155	19.835	18.36	12.83	8.02	Fun	FBgn0000139	ash2
MI291	MI291-RA	chr2	chr2	-	2576724	2580205	0.79	1.63	5.135	8.345	0.41	4.17	0.275	4.11	Fun	FBgn0051125	CG31125
MI292	MI292-RA	chr2	chr2	+	2580139	2585253	5.035	5.02	8.955	15.585	13.355	14.275	16.345	12.775	Dis	FBgn0039215	CG6695
MI292	MI292-RB	chr2	chr2	+	2580139	2585255	5.035	5.02	8.955	15.585	13.355	14.275	16.345	12.775	Dis	FBgn0039215	CG6695
MI292	MI292-RC	chr2	chr2	+	2580292	2584514	5.035	5.02	8.955	15.585	13.355	14.275	16.345	12.775	Dis	FBgn0039215	CG6695
MI293	MI293-RA	chr2	chr2	-	2585179	2586831	15.74	16.64	15.965	76.005	16.815	80.225	9.26	88.645	Fun	FBgn0020018	Ppox
MI294	MI294-RA	chr2	chr2	+	2591039	2640516	3.77	3.225	1.185	0.315	11.475	9.195	0.165	0.515	Fun	FBgn0003429	slo
MI294	MI294-RB	chr2	chr2	+	2595041	2640365	3.77	3.225	1.185	0.315	11.475	9.195	0.165	0.515	Fun	FBgn0003429	slo
MI294	MI294-RC	chr2	chr2	+	2595041	2640365	3.77	3.225	1.185	0.315	11.475	9.195	0.165	0.515	Fun	FBgn0003429	slo
MI294	MI294-RD	chr2	chr2	+	2595045	2640516	3.77	3.225	1.185	0.315	11.475	9.195	0.165	0.515	Fun	FBgn0003429	slo
MI294	MI294-RE	chr2	chr2	+	2595046	2636661	3.77	3.225	1.185	0.315	11.475	9.195	0.165	0.515	Fun	FBgn0003429	slo
MI295	MI295-RA	chr2	chr2	-	2597170	2597926	0.12	0.115	6.03	14.9	0.08	8.02	0.33	12.29	Fun	FBgn0039505	CG5934
MI296	MI296-RA	chr2	chr2	+	2641373	2646135	0.19	0.07	3.01	0.63	0.025	0.015	0	0	Fun	FBgn0039217	CG13627
MI297	MI297-RA	chr2	chr2	+	2646574	2647052	49.26	48.61	147.765	125.88	116.425	99.255	199.185	259.41	Fun	FBgn0039218	Rpb10
MI298	MI298-RA	chr2	chr2	-	2646741	2648454	15.65	19.14	33.48	80.385	32.715	121.775	28.235	174.08	Fun	FBgn0039219	CG13630
MI298	MI298-RB	chr2	chr2	-	2646983	2648454	15.65	19.14	33.48	80.385	32.715	121.775	28.235	174.08	Fun	FBgn0039219	CG13630
MI299	MI299-RA	chr2	chr2	+	2649778	2677673	10.025	8.415	13.975	8.655	8.85	4.5	0.91	1.5	Fun	FBgn0004885	tok
MI299	MI299-RB	chr2	chr2	+	2649778	2682482	10.025	8.415	13.975	8.655	8.85	4.5	0.91	1.5	Fun	FBgn0004885	tok
MI299	MI299-RC	chr2	chr2	+	2649788	2677671	10.025	8.415	13.975	8.655	8.85	4.5	0.91	1.5	Fun	FBgn0004885	tok
MI300	MI300-RA	chr2	chr2	+	2682996	2689895	1.85	2.255	8.835	24.17	11.33	9.7	27.585	5.765	Fun	FBgn0000140	asp
MI301	MI301-RA	chr2	chr2	-	2689586	2694851	6.95	6.035	2.865	4.045	5.63	8.395	0.05	8.1	Fun	FBgn0015591	AstA
MI301	MI301-RB	chr2	chr2	-	2689792	2694849	6.95	6.035	2.865	4.045	5.63	8.395	0.05	8.1	Fun	FBgn0015591	AstA
MI302	MI302-RA	chr2	chr2	+	2699786	2701774	15.65	16.14	5.365	10.48	42.63	39.575	13.795	2.69	Fun	FBgn0040600	CG13631
MI303	MI303-RA	chr2	chr2	-	2716490	2719446	6.675	7.9	10.485	15.26	18.48	12.56	16.72	6.795	Fun	FBgn0039223	CG5805
MI303	MI303-RB	chr2	chr2	-	2716490	2719446	6.675	7.9	10.485	15.26	18.48	12.56	16.72	6.795	Fun	FBgn0039223	CG5805
MI303	MI303-RC	chr2	chr2	-	2716492	2719446	6.675	7.9	10.485	15.26	18.48	12.56	16.72	6.795	Fun	FBgn0039223	CG5805
MI303	MI303-RD	chr2	chr2	-	2716505	2719439	6.675	7.9	10.485	15.26	18.48	12.56	16.72	6.795	Fun	FBgn0039223	CG5805
MI304	MI304-RA	chr2	chr2	-	2720986	2722926	0	0	0.74	0.3	0.04	0.065	0	0	Sil	FBgn0039224	CG13634
MI305	MI305-RA	chr2	chr2	-	2730271	2747632	6.82	8.9	12.83	25.78	13.035	27.605	36.04	30.21	Fun	FBgn0039227	polybromo
MI305	MI305-RB	chr2	chr2	-	2730271	2747632	6.82	8.9	12.83	25.78	13.035	27.605	36.04	30.21	Fun	FBgn0039227	polybromo
MI305	MI305-RC	chr2	chr2	-	2730271	2747687	6.82	8.9	12.83	25.78	13.035	27.605	36.04	30.21	Fun	FBgn0039227	polybromo
MI305	MI305-RD	chr2	chr2	-	2731575	2738422	6.82	8.9	12.83	25.78	13.035	27.605	36.04	30.21	Fun	FBgn0039227	polybromo
MI305	MI305-RE	chr2	chr2	-	2739026	2747687	6.82	8.9	12.83	25.78	13.035	27.605	36.04	30.21	Fun	FBgn0039227	polybromo
MI306	MI306-RA	chr2	chr2	+	2741083	2742170	0.4	0.315	1.195	72.24	0	58.5	0.355	54.375	Fun	FBgn0039228	CG6980
MI307	MI307-RA	chr2	chr2	+	2748272	2750076	2.585	2.755	2.365	10.545	12.61	35.845	21.81	153.365	Fun	FBgn0083986	CG34150
MI308	MI308-RA	chr2	chr2	-	2749185	2751282	6.795	7.87	18.96	32.19	17.785	9.71	32.4	7.595	Fun	FBgn0027617	CG5808
MI309	MI309-RA	chr2	chr2	+	2751874	2757082	9.415	10.78	30.715	40.325	25.46	22.885	22.525	9.095	Fun	FBgn0039229	Saf-B
MI310	MI310-RA	chr2	chr2	-	2760674	2764093	11.16	7.665	24.705	23.135	12.03	8.085	11.195	3.27	Fun	FBgn0051357	Kaz
MI310	MI310-RB	chr2	chr2	-	2760680	2764093	11.16	7.665	24.705	23.135	12.03	8.085	11.195	3.27	Fun	FBgn0051357	Kaz
MI311	MI311-RA	chr2	chr2	-	2764516	2766680	36.51	42.465	16.315	15.395	8.765	2.555	0.02	0.095	Fun	FBgn0039611	Nepl18
MI312	MI312-RA	chr2	chr2	-	2767061	2769403	1.575	3.44	0.545	0.87	0.12	0.27	0.02	0.39	Fun	FBgn0039609	Nepl17
MI313	MI313-RA	chr2	chr2	+	2770411	2773034	658.215	672.655	979.855	894.89	596.965	202.57	494.04	63.775	Fun	FBgn0002622	RpS3
MI314	MI314-RA	chr2	chr2	-	2770476	2771710	0.04	0	10.83	2.08	0.295	0.095	0.505	0.155	Fun
MI315	MI315-RA	chr2	chr2	-	2773418	2775756	24.7	14.535	2.56	1.02	16.795	2.52	14.65	0.09	Dis	FBgn0039073	CG4408
MI315	MI315-RB	chr2	chr2	-	2773418	2775787	24.7	14.535	2.56	1.02	16.795	2.52	14.65	0.09	Dis	FBgn0039073	CG4408
MI315	MI315-RC	chr2	chr2	-	2773419	2775787	24.7	14.535	2.56	1.02	16.795	2.52	14.65	0.09	Dis	FBgn0039073	CG4408
MI316	MI316-RA	chr2	chr2	-	2776452	2778202	0	0.015	0.025	12.04	0	34.175	0	54.925	Dis	FBgn0261998	CG42816
MI316	MI316-RB	chr2	chr2	-	2776452	2783619	0	0.015	0.025	12.04	0	34.175	0	54.925	Dis	FBgn0261998	CG42816
MI316	MI316-RC	chr2	chr2	-	2776452	2783619	0	0.015	0.025	12.04	0	34.175	0	54.925	Dis	FBgn0261998	CG42816
MI316	MI316-RD	chr2	chr2	-	2776452	2783619	0	0.015	0.025	12.04	0	34.175	0	54.925	Dis	FBgn0261998	CG42816
MI317	MI317-RA	chr2	chr2	+	2794219	2795334	0	0	0	0.04	0	2.82	0	18.735	Fun	FBgn0262009	CG42827
MI318	MI318-RA	chr2	chr2	+	2797719	2798384	0	0	0	0	0	14.63	0	388.125	Dis	FBgn0262009	CG42827
MI319	MI319-RA	chr2	chr2	+	2799305	2799940	0	0	0	0	0	21.63	0	277.17	Fun	FBgn0262009	CG42827
MI320	MI320-RA	chr2	chr2	+	2801075	2811370	0	0.015	0.05	8.01	0	14.69	0	80.515	Dis	FBgn0261998	CG42816
MI320	MI320-RB	chr2	chr2	+	2801204	2809475	0	0.015	0.05	8.01	0	14.69	0	80.515	Dis	FBgn0261998	CG42816
MI320	MI320-RC	chr2	chr2	+	2809655	2811370	0	0.015	0.05	8.01	0	14.69	0	80.515	Dis	FBgn0261998	CG42816
MI321	MI321-RA	chr2	chr2	+	2812135	2812558	0	0	0	0	0	34.28	0	433.7	Fun	FBgn0262009	CG42827
MI322	MI322-RA	chr2	chr2	+	2813051	2813576	0	0	0.135	0	0	5.255	0	125.505	Fun	FBgn0262009	CG42827
MI323	MI323-RA	chr2	chr2	+	2815396	2815832	0	0	0	0	0	17.115	0	268.68	Fun	FBgn0262009	CG42827
MI324	MI324-RA	chr2	chr2	+	2816120	2817255	0	0	0	0	0	23.945	0	3.355	Fun	FBgn0262010	CG42828
MI325	MI325-RA	chr2	chr2	-	2819141	2828803	0.575	0.535	10.675	5.26	1.095	1.09	0.2	0.68	Fun	FBgn0039075	CG4393
MI326	MI326-RA	chr2	chr2	-	2831044	2831678	0	0	0	0.065	0	4.915	0	0.6	Dis
MI327	MI327-RA	chr2	chr2	-	2832017	2838149	0	0	0	0	0	0.04	0	0.145	Sil	FBgn0051515	CG31515
MI328	MI328-RA	chr2	chr2	+	2845846	2846893	0	0	0.195	0.08	0	146.99	0	336.775	Fun	FBgn0051296	CG31296
MI329	MI329-RA	chr2	chr2	-	2852417	2860149	0.395	0.28	0.35	0.58	0.485	0.59	0	0.435	Sil	FBgn0039078	CG4374
MI330	MI330-RA	chr2	chr2	+	2898670	2922574	0	0	0	0	0	0	0	0.01	Sil
MI331	MI331-RA	chr2	chr2	-	2924992	2926571	0	0	0	0	0	14.79	0	0.565	Dis	FBgn0051265	CG31265
MI331	MI331-RB	chr2	chr2	-	2924992	2926571	0	0	0	0	0	14.79	0	0.565	Dis	FBgn0051265	CG31265
MI332	MI332-RA	chr2	chr2	+	2929380	2937702	0	0	0	0	0	0	0	0	Sil	FBgn0039080	Ir94h
MI333	MI333-RA	chr2	chr2	+	2938180	2943277	0	0	0	0.01	0	0	0	0	Sil
MI334	MI334-RA	chr2	chr2	-	2957233	2958131	0	0	0	7.37	0	17.98	0	31.355	Fun	FBgn0085318	CG34289
MI335	MI335-RA	chr2	chr2	-	2966368	2971168	15.86	26.23	3.025	14.27	17.03	59.475	0	64.755	Fun	FBgn0039081	Irk2
MI335	MI335-RB	chr2	chr2	-	2966370	2973510	15.86	26.23	3.025	14.27	17.03	59.475	0	64.755	Fun	FBgn0039081	Irk2
MI335	MI335-RC	chr2	chr2	-	2966379	2971371	15.86	26.23	3.025	14.27	17.03	59.475	0	64.755	Fun	FBgn0039081	Irk2
MI336	MI336-RA	chr2	chr2	-	2974155	2983561	0.195	0.355	0.3	1.05	5.17	3.575	0.43	0.165	Fun	FBgn0039084	CG10175
MI336	MI336-RB	chr2	chr2	-	2974155	2983561	0.195	0.355	0.3	1.05	5.17	3.575	0.43	0.165	Fun	FBgn0039084	CG10175
MI337	MI337-RA	chr2	chr2	-	2986075	2987788	2.2	2.46	0	0.145	1.15	1.02	0	0	Fun	FBgn0039087	Ugt303B2
MI338	MI338-RA	chr2	chr2	-	3006286	3008491	0	0.145	0	17.015	0	124.26	0	230.02	Dis
MI339	MI339-RA	chr2	chr2	+	3016762	3029781	0.175	0.16	4.3	2.005	1.005	1.055	0	0.015	Fun	FBgn0039089	beat-IV
MI340	MI340-RA	chr2	chr2	-	3038805	3044046	14.295	2.66	0.015	0.015	15.235	9.82	0.05	0.145	Fun	FBgn0039092	CG16723
MI340	MI340-RB	chr2	chr2	-	3040417	3044050	14.295	2.66	0.015	0.015	15.235	9.82	0.05	0.145	Fun	FBgn0039092	CG16723
MI340	MI340-RC	chr2	chr2	-	3040421	3047552	14.295	2.66	0.015	0.015	15.235	9.82	0.05	0.145	Fun	FBgn0039092	CG16723
MI340	MI340-RD	chr2	chr2	-	3044699	3047552	14.295	2.66	0.015	0.015	15.235	9.82	0.05	0.145	Fun	FBgn0039092	CG16723
MI341	MI341-RA	chr2	chr2	-	3048514	3049362	0	0	0.06	0	7.565	5.28	0.065	0	Fun
MI342	MI342-RA	chr2	chr2	-	3052630	3055675	2.98	4.26	1.36	1.84	14.02	4.615	4.75	0.24	Fun	FBgn0039094	CG10184
MI343	MI343-RA	chr2	chr2	-	3055909	3130531	8.06	5.715	7.07	4.825	33.705	33.795	8.625	1.06	Dis	FBgn0051145	CG31145
MI343	MI343-RB	chr2	chr2	-	3055909	3130531	8.06	5.715	7.07	4.825	33.705	33.795	8.625	1.06	Dis	FBgn0051145	CG31145
MI343	MI343-RC	chr2	chr2	-	3055912	3130134	8.06	5.715	7.07	4.825	33.705	33.795	8.625	1.06	Dis	FBgn0051145	CG31145
MI344	MI344-RA	chr2	chr2	+	3102865	3109323	1.075	1.595	0	24.03	0.305	30.12	0.2	27.35	Dis	FBgn0000405	CycB
MI344	MI344-RB	chr2	chr2	+	3102865	3109323	1.075	1.595	0	24.03	0.305	30.12	0.2	27.35	Dis	FBgn0000405	CycB
MI344	MI344-RC	chr2	chr2	+	3102869	3109872	1.075	1.595	0	24.03	0.305	30.12	0.2	27.35	Dis	FBgn0000405	CycB
MI345	MI345-RA	chr2	chr2	-	3137395	3138889	0	0	0.09	0.08	0.08	0	0	0.52	Sil	FBgn0035012	CG13590
MI346	MI346-RA	chr2	chr2	+	3139554	3140517	2.885	5.365	8.4	2.985	8.6	2.835	27.58	5.155	Fun	FBgn0039098	GILT3
MI347	MI347-RA	chr2	chr2	+	3141189	3142342	9.845	5.89	21.545	40.23	2.845	126.93	1.255	383.215	Fun	FBgn0039099	GILT2
MI348	MI348-RA	chr2	chr2	+	3142697	3144947	74.355	77.23	88.19	100.7	152.31	41.105	99.85	14.07	Fun	FBgn0040227	eIF3d1
MI349	MI349-RA	chr2	chr2	-	3143792	3144069	0	0	3.295	0	0	0	0	0.5	Fun
MI350	MI350-RA	chr2	chr2	+	3145018	3148634	82.43	42.835	229.035	160.76	59.325	13.675	0.29	4.145	Fun	FBgn0039102	SPE
MI350	MI350-RB	chr2	chr2	+	3146662	3148634	82.43	42.835	229.035	160.76	59.325	13.675	0.29	4.145	Fun	FBgn0039102	SPE
MI351	MI351-RA	chr2	chr2	-	3148098	3157928	2.54	3.77	8.15	50.68	60.625	99.815	78.975	78.84	Fun	FBgn0027512	CG10254
MI352	MI352-RA	chr2	chr2	-	3167037	3168173	0	1.545	0.05	214.365	0	835.01	0	2147.01	Fun	FBgn0039104	CG10252
MI353	MI353-RA	chr2	chr2	+	3167386	3169266	0	0.065	0	24.505	0	24.325	0	27.425	Fun	FBgn0029094	asf1
MI354	MI354-RA	chr2	chr2	+	3172567	3175527	41.36	60.515	0	1.03	24.265	8.595	0.035	3.155	Fun	FBgn0051148	Gba1a
MI355	MI355-RA	chr2	chr2	-	3172892	3175463	0.03	0.075	0.16	4.155	0.755	16.165	0.745	121.02	Fun
MI356	MI356-RA	chr2	chr2	+	3175778	3181439	46.41	38.935	1.91	3.695	28.07	19.125	3.99	3.85	Fun	FBgn0051414	Gba1b
MI356	MI356-RB	chr2	chr2	+	3175847	3182875	46.41	38.935	1.91	3.695	28.07	19.125	3.99	3.85	Fun	FBgn0051414	Gba1b
MI356	MI356-RC	chr2	chr2	+	3181610	3182876	46.41	38.935	1.91	3.695	28.07	19.125	3.99	3.85	Fun	FBgn0051414	Gba1b
MI357	MI357-RA	chr2	chr2	-	3182769	3188824	0.695	0.865	0.525	0.57	1.54	2.18	0	0.655	Fun	FBgn0002922	nau
MI358	MI358-RA	chr2	chr2	+	3191355	3192528	0	0	0	0.07	0	0	0	0.05	Sil
MI359	MI359-RA	chr2	chr2	+	3194621	3203441	33.885	30.93	39.46	66.755	43.545	221.78	18.255	619.35	Fun	FBgn0039109	CG10365
MI359	MI359-RB	chr2	chr2	+	3194653	3203441	33.885	30.93	39.46	66.755	43.545	221.78	18.255	619.35	Fun	FBgn0039109	CG10365
MI360	MI360-RA	chr2	chr2	-	3200694	3202204	0.905	1.525	3.85	2.655	0.54	0.49	28.39	0.715	Dis
MI361	MI361-RA	chr2	chr2	-	3203319	3204918	100.31	84.46	94.975	152.13	71.775	82.32	180.425	75.52	Fun	FBgn0028691	Rpn9
MI362	MI362-RA	chr2	chr2	+	3205029	3206430	8.43	7.945	19.855	36.27	10.75	26.215	29.25	42.68	Fun	FBgn0027526	Ublcp1
MI363	MI363-RA	chr2	chr2	-	3206320	3211366	0.19	0.53	0.06	1.975	8.085	6.75	0.32	2.35	Fun	FBgn0039048	CG17111
MI364	MI364-RA	chr2	chr2	-	3216197	3256201	1.42	1.575	25.85	14.625	15.835	13.465	0.02	0.01	Fun	FBgn0039054	Cow
MI364	MI364-RB	chr2	chr2	-	3216197	3256201	1.42	1.575	25.85	14.625	15.835	13.465	0.02	0.01	Fun	FBgn0039054	Cow
MI365	MI365-RA	chr2	chr2	+	3238551	3240719	83.725	99.93	42.095	19.295	106.325	63.625	21.04	3.35	Fun	FBgn0039049	CG6726
MI365	MI365-RB	chr2	chr2	+	3238551	3240723	83.725	99.93	42.095	19.295	106.325	63.625	21.04	3.35	Fun	FBgn0039049	CG6726
MI366	MI366-RA	chr2	chr2	+	3240897	3244169	97.63	79.04	3.19	1.675	34.96	21.545	1.77	0.365	Fun	FBgn0039049	CG6726
MI366	MI366-RB	chr2	chr2	+	3242668	3244169	97.63	79.04	3.19	1.675	34.96	21.545	1.77	0.365	Fun	FBgn0039049	CG6726
MI367	MI367-RA	chr2	chr2	-	3257618	3262379	2.25	2.59	16.53	19.705	16.26	10.62	19.035	5.825	Fun	FBgn0039055	Rassf
MI368	MI368-RA	chr2	chr2	+	3262624	3268255	4.775	5.295	8.88	11.1	13.43	5.16	28.125	2.88	Fun	FBgn0039056	CenB1A
MI368	MI368-RB	chr2	chr2	+	3262624	3268255	4.775	5.295	8.88	11.1	13.43	5.16	28.125	2.88	Fun	FBgn0039056	CenB1A
MI369	MI369-RA	chr2	chr2	-	3267762	3270753	1.3	1.85	4.7	20.52	3.24	14.73	12.395	10.095	Fun	FBgn0051365	CG31365
MI370	MI370-RA	chr2	chr2	-	3270869	3272549	1.08	2.135	8.48	20.61	2.93	12.045	28.625	14.53	Fun	FBgn0051457	CG31457
MI371	MI371-RA	chr2	chr2	+	3272310	3276376	73.495	79.42	80.765	126.54	56.74	77.875	57.85	45.44	Fun	FBgn0028692	Rpn2
MI371	MI371-RB	chr2	chr2	+	3272310	3276376	73.495	79.42	80.765	126.54	56.74	77.875	57.85	45.44	Fun	FBgn0028692	Rpn2
MI371	MI371-RC	chr2	chr2	+	3272310	3276376	73.495	79.42	80.765	126.54	56.74	77.875	57.85	45.44	Fun	FBgn0028692	Rpn2
MI371	MI371-RD	chr2	chr2	+	3272310	3276376	73.495	79.42	80.765	126.54	56.74	77.875	57.85	45.44	Fun	FBgn0028692	Rpn2
MI371	MI371-RE	chr2	chr2	+	3272794	3276376	73.495	79.42	80.765	126.54	56.74	77.875	57.85	45.44	Fun	FBgn0028692	Rpn2
MI372	MI372-RA	chr2	chr2	-	3275420	3276302	0.28	0.3	2.38	2.02	0.74	1.47	0.435	0.055	Fun
MI373	MI373-RA	chr2	chr2	+	3277489	3281575	13.86	10.59	21.83	17.31	5.505	4.115	0	1.07	Fun	FBgn0037697	GstZ2
MI373	MI373-RB	chr2	chr2	+	3278932	3281575	13.86	10.59	21.83	17.31	5.505	4.115	0	1.07	Fun	FBgn0037697	GstZ2
MI374	MI374-RA	chr2	chr2	+	3281635	3282931	7.8	5.045	13.415	6.005	16.94	5.045	5.525	0.575	Fun	FBgn0037696	GstZ1
MI375	MI375-RA	chr2	chr2	-	3282931	3305523	18.16	22.795	16.745	13.475	48.755	44.55	4.79	13.11	Fun	FBgn0261552	ps
MI375	MI375-RB	chr2	chr2	-	3282931	3305523	18.16	22.795	16.745	13.475	48.755	44.55	4.79	13.11	Fun	FBgn0261552	ps
MI375	MI375-RC	chr2	chr2	-	3282931	3305523	18.16	22.795	16.745	13.475	48.755	44.55	4.79	13.11	Fun	FBgn0261552	ps
MI375	MI375-RD	chr2	chr2	-	3282931	3305523	18.16	22.795	16.745	13.475	48.755	44.55	4.79	13.11	Fun	FBgn0261552	ps
MI375	MI375-RE	chr2	chr2	-	3282931	3305523	18.16	22.795	16.745	13.475	48.755	44.55	4.79	13.11	Fun	FBgn0261552	ps
MI375	MI375-RF	chr2	chr2	-	3282931	3313165	18.16	22.795	16.745	13.475	48.755	44.55	4.79	13.11	Fun	FBgn0261552	ps
MI375	MI375-RG	chr2	chr2	-	3282931	3324902	18.16	22.795	16.745	13.475	48.755	44.55	4.79	13.11	Fun	FBgn0261552	ps
MI375	MI375-RH	chr2	chr2	-	3282931	3324902	18.16	22.795	16.745	13.475	48.755	44.55	4.79	13.11	Fun	FBgn0261552	ps
MI375	MI375-RI	chr2	chr2	-	3282931	3324902	18.16	22.795	16.745	13.475	48.755	44.55	4.79	13.11	Fun	FBgn0261552	ps
MI375	MI375-RJ	chr2	chr2	-	3282931	3324902	18.16	22.795	16.745	13.475	48.755	44.55	4.79	13.11	Fun	FBgn0261552	ps
MI375	MI375-RK	chr2	chr2	-	3282931	3324902	18.16	22.795	16.745	13.475	48.755	44.55	4.79	13.11	Fun	FBgn0261552	ps
MI375	MI375-RL	chr2	chr2	-	3282931	3324902	18.16	22.795	16.745	13.475	48.755	44.55	4.79	13.11	Fun	FBgn0261552	ps
MI375	MI375-RM	chr2	chr2	-	3282936	3324857	18.16	22.795	16.745	13.475	48.755	44.55	4.79	13.11	Fun	FBgn0261552	ps
MI375	MI375-RN	chr2	chr2	-	3282936	3324857	18.16	22.795	16.745	13.475	48.755	44.55	4.79	13.11	Fun	FBgn0261552	ps
MI375	MI375-RO	chr2	chr2	-	3282936	3324857	18.16	22.795	16.745	13.475	48.755	44.55	4.79	13.11	Fun	FBgn0261552	ps
MI375	MI375-RP	chr2	chr2	-	3282936	3324857	18.16	22.795	16.745	13.475	48.755	44.55	4.79	13.11	Fun	FBgn0261552	ps
MI375	MI375-RQ	chr2	chr2	-	3285707	3305043	18.16	22.795	16.745	13.475	48.755	44.55	4.79	13.11	Fun	FBgn0261552	ps
MI375	MI375-RR	chr2	chr2	-	3285707	3312501	18.16	22.795	16.745	13.475	48.755	44.55	4.79	13.11	Fun	FBgn0261552	ps
MI375	MI375-RS	chr2	chr2	-	3285707	3312501	18.16	22.795	16.745	13.475	48.755	44.55	4.79	13.11	Fun	FBgn0261552	ps
MI375	MI375-RT	chr2	chr2	-	3285707	3312501	18.16	22.795	16.745	13.475	48.755	44.55	4.79	13.11	Fun	FBgn0261552	ps
MI375	MI375-RU	chr2	chr2	-	3285707	3324846	18.16	22.795	16.745	13.475	48.755	44.55	4.79	13.11	Fun	FBgn0261552	ps
MI375	MI375-RV	chr2	chr2	-	3285707	3324846	18.16	22.795	16.745	13.475	48.755	44.55	4.79	13.11	Fun	FBgn0261552	ps
MI375	MI375-RW	chr2	chr2	-	3285707	3324890	18.16	22.795	16.745	13.475	48.755	44.55	4.79	13.11	Fun	FBgn0261552	ps
MI375	MI375-RX	chr2	chr2	-	3285707	3324890	18.16	22.795	16.745	13.475	48.755	44.55	4.79	13.11	Fun	FBgn0261552	ps
MI375	MI375-RY	chr2	chr2	-	3285708	3324848	18.16	22.795	16.745	13.475	48.755	44.55	4.79	13.11	Fun	FBgn0261552	ps
MI376	MI376-RA	chr2	chr2	-	3325437	3329595	8.12	9.26	25.655	54.97	9.59	67.245	15.16	53.445	Fun	FBgn0011740	alpha-Man-IIa
MI376	MI376-RB	chr2	chr2	-	3325437	3334935	8.12	9.26	25.655	54.97	9.59	67.245	15.16	53.445	Fun	FBgn0011740	alpha-Man-IIa
MI376	MI376-RC	chr2	chr2	-	3325439	3334935	8.12	9.26	25.655	54.97	9.59	67.245	15.16	53.445	Fun	FBgn0011740	alpha-Man-IIa
MI376	MI376-RD	chr2	chr2	-	3325439	3334935	8.12	9.26	25.655	54.97	9.59	67.245	15.16	53.445	Fun	FBgn0011740	alpha-Man-IIa
MI376	MI376-RE	chr2	chr2	-	3325439	3334935	8.12	9.26	25.655	54.97	9.59	67.245	15.16	53.445	Fun	FBgn0011740	alpha-Man-IIa
MI376	MI376-RF	chr2	chr2	-	3325441	3334935	8.12	9.26	25.655	54.97	9.59	67.245	15.16	53.445	Fun	FBgn0011740	alpha-Man-IIa
MI377	MI377-RA	chr2	chr2	+	3329663	3339116	0.935	1.945	16.015	315.58	3.65	1106.94	1.975	1072.9	Fun	FBgn0003889	betaTub85D
MI377	MI377-RB	chr2	chr2	+	3329663	3339116	0.935	1.945	16.015	315.58	3.65	1106.94	1.975	1072.9	Fun	FBgn0003889	betaTub85D
MI377	MI377-RC	chr2	chr2	+	3329663	3339121	0.935	1.945	16.015	315.58	3.65	1106.94	1.975	1072.9	Fun	FBgn0003889	betaTub85D
MI377	MI377-RD	chr2	chr2	+	3329663	3339121	0.935	1.945	16.015	315.58	3.65	1106.94	1.975	1072.9	Fun	FBgn0003889	betaTub85D
MI377	MI377-RE	chr2	chr2	+	3329666	3339121	0.935	1.945	16.015	315.58	3.65	1106.94	1.975	1072.9	Fun	FBgn0003889	betaTub85D
MI377	MI377-RF	chr2	chr2	+	3331678	3339116	0.935	1.945	16.015	315.58	3.65	1106.94	1.975	1072.9	Fun	FBgn0003889	betaTub85D
MI377	MI377-RG	chr2	chr2	+	3331678	3339116	0.935	1.945	16.015	315.58	3.65	1106.94	1.975	1072.9	Fun	FBgn0003889	betaTub85D
MI377	MI377-RH	chr2	chr2	+	3331678	3339116	0.935	1.945	16.015	315.58	3.65	1106.94	1.975	1072.9	Fun	FBgn0003889	betaTub85D
MI377	MI377-RI	chr2	chr2	+	3331678	3339121	0.935	1.945	16.015	315.58	3.65	1106.94	1.975	1072.9	Fun	FBgn0003889	betaTub85D
MI377	MI377-RJ	chr2	chr2	+	3331678	3339121	0.935	1.945	16.015	315.58	3.65	1106.94	1.975	1072.9	Fun	FBgn0003889	betaTub85D
MI377	MI377-RK	chr2	chr2	+	3331678	3339121	0.935	1.945	16.015	315.58	3.65	1106.94	1.975	1072.9	Fun	FBgn0003889	betaTub85D
MI377	MI377-RL	chr2	chr2	+	3331678	3339121	0.935	1.945	16.015	315.58	3.65	1106.94	1.975	1072.9	Fun	FBgn0003889	betaTub85D
MI377	MI377-RM	chr2	chr2	+	3331678	3339121	0.935	1.945	16.015	315.58	3.65	1106.94	1.975	1072.9	Fun	FBgn0003889	betaTub85D
MI377	MI377-RN	chr2	chr2	+	3331678	3339121	0.935	1.945	16.015	315.58	3.65	1106.94	1.975	1072.9	Fun	FBgn0003889	betaTub85D
MI377	MI377-RO	chr2	chr2	+	3331678	3339121	0.935	1.945	16.015	315.58	3.65	1106.94	1.975	1072.9	Fun	FBgn0003889	betaTub85D
MI377	MI377-RP	chr2	chr2	+	3331678	3339121	0.935	1.945	16.015	315.58	3.65	1106.94	1.975	1072.9	Fun	FBgn0003889	betaTub85D
MI377	MI377-RQ	chr2	chr2	+	3331678	3339121	0.935	1.945	16.015	315.58	3.65	1106.94	1.975	1072.9	Fun	FBgn0003889	betaTub85D
MI377	MI377-RR	chr2	chr2	+	3331678	3339121	0.935	1.945	16.015	315.58	3.65	1106.94	1.975	1072.9	Fun	FBgn0003889	betaTub85D
MI377	MI377-RS	chr2	chr2	+	3331678	3339121	0.935	1.945	16.015	315.58	3.65	1106.94	1.975	1072.9	Fun	FBgn0003889	betaTub85D
MI377	MI377-RT	chr2	chr2	+	3331678	3339121	0.935	1.945	16.015	315.58	3.65	1106.94	1.975	1072.9	Fun	FBgn0003889	betaTub85D
MI377	MI377-RU	chr2	chr2	+	3331678	3339121	0.935	1.945	16.015	315.58	3.65	1106.94	1.975	1072.9	Fun	FBgn0003889	betaTub85D
MI377	MI377-RV	chr2	chr2	+	3331678	3339121	0.935	1.945	16.015	315.58	3.65	1106.94	1.975	1072.9	Fun	FBgn0003889	betaTub85D
MI377	MI377-RW	chr2	chr2	+	3331678	3339614	0.935	1.945	16.015	315.58	3.65	1106.94	1.975	1072.9	Fun	FBgn0003889	betaTub85D
MI376	MI376-RG	chr2	chr2	-	3331890	3334934	8.12	9.26	25.655	54.97	9.59	67.245	15.16	53.445	Fun	FBgn0011740	alpha-Man-IIa
MI378	MI378-RA	chr2	chr2	-	3339410	3342363	5.97	7.24	14.695	24.3	12.545	17.265	17.12	10.945	Fun	FBgn0037689	CG8135
MI379	MI379-RA	chr2	chr2	+	3342713	3344274	6.87	7.26	11.67	28.3	7.945	85.1	13.095	121.385	Fun	FBgn0037688	CG9356
MI380	MI380-RA	chr2	chr2	-	3344204	3345278	22.475	21.77	20.19	23.985	43.58	26.555	21.17	16.985	Fun	FBgn0037687	CG8132
MI380	MI380-RB	chr2	chr2	-	3344204	3345378	22.475	21.77	20.19	23.985	43.58	26.555	21.17	16.985	Fun	FBgn0037687	CG8132
MI381	MI381-RA	chr2	chr2	+	3345497	3347128	1773.56	1682.87	2080.76	1651.65	1127.3	333.385	684.97	115.715	Fun	FBgn0037686	RpL34b
MI381	MI381-RB	chr2	chr2	+	3345707	3346577	1773.56	1682.87	2080.76	1651.65	1127.3	333.385	684.97	115.715	Fun	FBgn0037686	RpL34b
MI382	MI382-RA	chr2	chr2	-	3345911	3352323	0.025	0.025	0.265	0.76	1.12	2.295	1.275	3.165	Fun	FBgn0037685	Or85f
MI383	MI383-RA	chr2	chr2	+	3351493	3352290	0	0.055	0	8.725	0	54.565	0	209.665	Fun	FBgn0033168	CG11145
MI384	MI384-RA	chr2	chr2	+	3352700	3382620	5.6	6.25	11.565	9.2	7.89	6.24	1.15	0.98	Fun	FBgn0000723	FER
MI384	MI384-RB	chr2	chr2	+	3352700	3382623	5.6	6.25	11.565	9.2	7.89	6.24	1.15	0.98	Fun	FBgn0000723	FER
MI385	MI385-RA	chr2	chr2	-	3382424	3385208	66.165	84.275	1.455	0.755	32.87	33.545	0.205	1.68	Fun	FBgn0037684	Srr
MI385	MI385-RB	chr2	chr2	-	3382424	3385208	66.165	84.275	1.455	0.755	32.87	33.545	0.205	1.68	Fun	FBgn0037684	Srr
MI386	MI386-RA	chr2	chr2	-	3385609	3387209	62.525	73.975	192.255	188.89	117.77	191.93	107.215	159.395	Fun	FBgn0037683	CG18473
MI386	MI386-RB	chr2	chr2	-	3385609	3405681	62.525	73.975	192.255	188.89	117.77	191.93	107.215	159.395	Fun	FBgn0037683	CG18473
MI386	MI386-RC	chr2	chr2	-	3388994	3408909	62.525	73.975	192.255	188.89	117.77	191.93	107.215	159.395	Fun	FBgn0037683	CG18473
MI386	MI386-RD	chr2	chr2	-	3388998	3396639	62.525	73.975	192.255	188.89	117.77	191.93	107.215	159.395	Fun	FBgn0037683	CG18473
MI386	MI386-RE	chr2	chr2	-	3388998	3396641	62.525	73.975	192.255	188.89	117.77	191.93	107.215	159.395	Fun	FBgn0037683	CG18473
MI387	MI387-RA	chr2	chr2	-	3411933	3415022	8.38	8.635	53.67	38.29	15.65	10.43	35.835	11.87	Fun	FBgn0037680	pasi2
MI387	MI387-RB	chr2	chr2	-	3411933	3415022	8.38	8.635	53.67	38.29	15.65	10.43	35.835	11.87	Fun	FBgn0037680	pasi2
MI387	MI387-RC	chr2	chr2	-	3412920	3415022	8.38	8.635	53.67	38.29	15.65	10.43	35.835	11.87	Fun	FBgn0037680	pasi2
MI388	MI388-RA	chr2	chr2	-	3416621	3418197	12.825	14.53	20.1	32.6	81.13	23.575	177.775	23.22	Fun	FBgn0038989	CG6937
MI389	MI389-RA	chr2	chr2	+	3418590	3420505	3.605	2.385	8.11	5.515	5.16	2.865	3.625	3.265	Fun	FBgn0053107	CG33107
MI390	MI390-RA	chr2	chr2	+	3420711	3422157	11.265	12.3	21.55	31.02	105.45	13.8	207.1	14.125	Fun	FBgn0024558	Dph5
MI391	MI391-RA	chr2	chr2	-	3422125	3440006	6.77	8.27	11.685	20.25	16.99	44.945	17.39	26.315	Fun	FBgn0053110	CG33110
MI391	MI391-RB	chr2	chr2	-	3424758	3440006	6.77	8.27	11.685	20.25	16.99	44.945	17.39	26.315	Fun	FBgn0053110	CG33110
MI392	MI392-RA	chr2	chr2	+	3442617	3446402	1.82	3.795	0.15	0.04	0.225	1.24	2.96	0.05	Fun	FBgn0038986	sit
MI393	MI393-RA	chr2	chr2	-	3448865	3452495	7.49	8.185	2.365	33.46	15.4	74.38	7.94	21.17	Fun	FBgn0260942	bond
MI393	MI393-RB	chr2	chr2	-	3448865	3454818	7.49	8.185	2.365	33.46	15.4	74.38	7.94	21.17	Fun	FBgn0260942	bond
MI394	MI394-RA	chr2	chr2	+	3457022	3461441	41.34	39.57	65.925	76.94	102.78	122.445	89.875	149.56	Fun	FBgn0038984	AdipoR
MI394	MI394-RB	chr2	chr2	+	3457022	3461441	41.34	39.57	65.925	76.94	102.78	122.445	89.875	149.56	Fun	FBgn0038984	AdipoR
MI394	MI394-RC	chr2	chr2	+	3457117	3461423	41.34	39.57	65.925	76.94	102.78	122.445	89.875	149.56	Fun	FBgn0038984	AdipoR
MI394	MI394-RD	chr2	chr2	+	3457117	3461441	41.34	39.57	65.925	76.94	102.78	122.445	89.875	149.56	Fun	FBgn0038984	AdipoR
MI394	MI394-RE	chr2	chr2	+	3457145	3461414	41.34	39.57	65.925	76.94	102.78	122.445	89.875	149.56	Fun	FBgn0038984	AdipoR
MI395	MI395-RA	chr2	chr2	+	3470010	3472824	0.825	1.95	1.875	17.825	40.705	7.58	4.055	0.685	Fun	FBgn0038983	CG5326
MI395	MI395-RB	chr2	chr2	+	3470010	3472824	0.825	1.95	1.875	17.825	40.705	7.58	4.055	0.685	Fun	FBgn0038983	CG5326
MI395	MI395-RC	chr2	chr2	+	3470526	3472811	0.825	1.95	1.875	17.825	40.705	7.58	4.055	0.685	Fun	FBgn0038983	CG5326
MI396	MI396-RA	chr2	chr2	+	3472970	3474398	11.19	9.08	16.37	7.79	33.845	18.07	0.205	4.4	Fun	FBgn0053099	CG33099
MI397	MI397-RA	chr2	chr2	+	3476748	3484334	16.93	17.235	28.9	33.045	23.26	13.84	5.59	4.59	Fun	FBgn0038981	CG5346
MI398	MI398-RA	chr2	chr2	-	3494472	3508939	0.07	0.085	0.17	0	1.755	0.385	0	0	Dis	FBgn0038980	Octbeta1R
MI399	MI399-RA	chr2	chr2	-	3514192	3515011	0	0.955	0.14	2.73	41.16	2.625	169.49	6.885	Dis	FBgn0036799	CG13380
MI400	MI400-RA	chr2	chr2	+	3515828	3523641	10.685	9.89	8.82	15.05	11.255	27.955	9.455	28.17	Fun	FBgn0024273	WASp
MI400	MI400-RB	chr2	chr2	+	3515829	3523639	10.685	9.89	8.82	15.05	11.255	27.955	9.455	28.17	Fun	FBgn0024273	WASp
MI400	MI400-RC	chr2	chr2	+	3516478	3523641	10.685	9.89	8.82	15.05	11.255	27.955	9.455	28.17	Fun	FBgn0024273	WASp
MI400	MI400-RD	chr2	chr2	+	3518881	3523639	10.685	9.89	8.82	15.05	11.255	27.955	9.455	28.17	Fun	FBgn0024273	WASp
MI401	MI401-RA	chr2	chr2	-	3524675	3530081	1.59	1.92	5.07	8.065	3.685	3.425	9.125	1.555	Dis	FBgn0039602	CG1647
MI402	MI402-RA	chr2	chr2	+	3529871	3532404	5.215	8.295	13.915	48.425	8.62	17.77	19.685	15.035	Fun	FBgn0039601	CG1523
MI403	MI403-RA	chr2	chr2	-	3532275	3538106	11.59	14.555	48.62	57.68	25.72	22.685	29.15	14.225	Fun	FBgn0039600	CG1646
MI403	MI403-RB	chr2	chr2	-	3532291	3538106	11.59	14.555	48.62	57.68	25.72	22.685	29.15	14.225	Fun	FBgn0039600	CG1646
MI403	MI403-RC	chr2	chr2	-	3532291	3538106	11.59	14.555	48.62	57.68	25.72	22.685	29.15	14.225	Fun	FBgn0039600	CG1646
MI403	MI403-RD	chr2	chr2	-	3532291	3538106	11.59	14.555	48.62	57.68	25.72	22.685	29.15	14.225	Fun	FBgn0039600	CG1646
MI404	MI404-RA	chr2	chr2	+	3539619	3543134	4.105	4.925	9.49	25.235	7.325	10.085	21.965	6.01	Fun	FBgn0005642	wdn
MI405	MI405-RA	chr2	chr2	-	3556515	3558466	0.02	0	0	0.035	0	16.19	0	0.455	Fun	FBgn0039599	intr
MI406	MI406-RA	chr2	chr2	+	3577686	3580879	0	0	0	0.02	0.01	124.685	0.015	2.825	Dis	FBgn0039598	aqrs
MI407	MI407-RA	chr2	chr2	-	3582756	3583311	0	0	0	0	0	6.785	0	0	Dis
MI408	MI408-RA	chr2	chr2	+	3585428	3587783	0.405	0.525	0	0.02	0.265	14.42	0	0.31	Dis	FBgn0039596	CG10000
MI409	MI409-RA	chr2	chr2	+	3592510	3601001	1.535	1.205	0.55	0.485	2.12	1.09	0.1	0.08	Fun	FBgn0039595	AstA-R2
MI410	MI410-RA	chr2	chr2	-	3603675	3644903	2.13	2.5	5.725	4.885	4.325	7.015	3.395	6.22	Fun	FBgn0027655	htt
MI410	MI410-RB	chr2	chr2	-	3603678	3626589	2.13	2.5	5.725	4.885	4.325	7.015	3.395	6.22	Fun	FBgn0027655	htt
MI411	MI411-RA	chr2	chr2	-	3645378	3660154	3.165	3.68	8.965	14.065	24.46	17.5	5.475	1.5	Fun	FBgn0039594	snu
MI411	MI411-RB	chr2	chr2	-	3645378	3668113	3.165	3.68	8.965	14.065	24.46	17.5	5.475	1.5	Fun	FBgn0039594	snu
MI411	MI411-RC	chr2	chr2	-	3645421	3659930	3.165	3.68	8.965	14.065	24.46	17.5	5.475	1.5	Fun	FBgn0039594	snu
MI411	MI411-RD	chr2	chr2	-	3645426	3668113	3.165	3.68	8.965	14.065	24.46	17.5	5.475	1.5	Fun	FBgn0039594	snu
MI412	MI412-RA	chr2	chr2	-	3670927	3671812	0	0	0	0	0.05	0.165	0	0	Sil	FBgn0261289	CheB98a
MI413	MI413-RA	chr2	chr2	+	3674157	3676249	0.035	1.245	0.1	18.465	0.015	19.8	0	31.82	Dis	FBgn0011569	can
MI413	MI413-RB	chr2	chr2	+	3674157	3676249	0.035	1.245	0.1	18.465	0.015	19.8	0	31.82	Dis	FBgn0011569	can
MI414	MI414-RA	chr2	chr2	+	3696112	3696572	0	0	0	7.53	0	27.74	0	54.995	Fun
MI415	MI415-RA	chr2	chr2	+	3703654	3704922	0	0	0.665	1.045	0	0	0	0	Fun	FBgn0039592	CG14062
MI416	MI416-RA	chr2	chr2	+	3707575	3710645	3.985	0.865	8.165	6.745	6.53	6.06	0	0.555	Fun	FBgn0039592	CG14062
MI416	MI416-RB	chr2	chr2	+	3707920	3710636	3.985	0.865	8.165	6.745	6.53	6.06	0	0.555	Fun	FBgn0039592	CG14062
MI416	MI416-RC	chr2	chr2	+	3709089	3710645	3.985	0.865	8.165	6.745	6.53	6.06	0	0.555	Fun	FBgn0039592	CG14062
MI417	MI417-RA	chr2	chr2	+	3720575	3757059	1.195	1.635	7.12	7.12	4.365	4.025	2.185	1.615	Dis	FBgn0039590	CG10011
MI417	MI417-RB	chr2	chr2	+	3720575	3757059	1.195	1.635	7.12	7.12	4.365	4.025	2.185	1.615	Dis	FBgn0039590	CG10011
MI418	MI418-RA	chr2	chr2	-	3755567	3764547	56.575	58.655	158.46	121.87	125.255	50.92	143.995	21.47	Fun	FBgn0039589	CG9986
MI418	MI418-RB	chr2	chr2	-	3760073	3764582	56.575	58.655	158.46	121.87	125.255	50.92	143.995	21.47	Fun	FBgn0039589	CG9986
MI418	MI418-RC	chr2	chr2	-	3760073	3764582	56.575	58.655	158.46	121.87	125.255	50.92	143.995	21.47	Fun	FBgn0039589	CG9986
MI419	MI419-RA	chr2	chr2	-	3764727	3766173	0	0	0	3.01	0.025	22.22	0.04	348.35	Fun	FBgn0038978	tHMG1
MI420	MI420-RA	chr2	chr2	-	3766281	3770789	0.455	0.525	0.02	1.28	3.23	1.405	5.545	0.91	Fun	FBgn0013953	Esp
MI421	MI421-RA	chr2	chr2	+	3766466	3767926	0	0	0	3.52	0	20.965	0	121.645	Fun	FBgn0038978	tHMG1
MI422	MI422-RA	chr2	chr2	-	3777501	3781455	0.63	0.42	1.335	0.46	3.5	2.98	0	0.055	Fun	FBgn0039232	sosie
MI423	MI423-RA	chr2	chr2	-	3783583	3785966	0	0.03	0	23.785	0	51.595	0	73.6	Fun	FBgn0050384	CG30384
MI424	MI424-RA	chr2	chr2	-	3790205	3792510	40.44	42.45	55	71.165	31.365	38.11	35.755	32.325	Fun	FBgn0024509	Sec13
MI425	MI425-RA	chr2	chr2	-	3792957	3794211	3.265	3.54	15.24	14.49	6.8	4.12	70.365	11.575	Fun
MI425	MI425-RB	chr2	chr2	-	3792991	3794211	3.265	3.54	15.24	14.49	6.8	4.12	70.365	11.575	Fun
MI425	MI425-RC	chr2	chr2	-	3793010	3794220	3.265	3.54	15.24	14.49	6.8	4.12	70.365	11.575	Fun
MI426	MI426-RA	chr2	chr2	+	3794939	3795835	355.89	500.85	259.16	267.895	1535.61	1049.51	328.65	90.125	Fun	FBgn0016119	ATPsynCF6
MI426	MI426-RB	chr2	chr2	+	3794939	3795835	355.89	500.85	259.16	267.895	1535.61	1049.51	328.65	90.125	Fun	FBgn0016119	ATPsynCF6
MI426	MI426-RC	chr2	chr2	+	3794939	3795901	355.89	500.85	259.16	267.895	1535.61	1049.51	328.65	90.125	Fun	FBgn0016119	ATPsynCF6
MI427	MI427-RA	chr2	chr2	-	3794966	3803009	0.995	1.425	2.43	6.07	3.735	4.965	9.755	3.91	Fun	FBgn0264326	PolE1
MI428	MI428-RA	chr2	chr2	-	3824193	3834073	0.1	0.11	0.535	0.28	0.205	0.205	0	0.01	Sil	FBgn0002941	slou
MI429	MI429-RA	chr2	chr2	-	3836285	3837546	0	0	0	5.02	0	20.67	0	71.915	Fun	FBgn0030015	CG10761
MI430	MI430-RA	chr2	chr2	-	3856164	3856676	2435.84	1235.34	1.215	2.32	0	0	0	0	Fun	FBgn0040565	CG7606
MI431	MI431-RA	chr2	chr2	-	3857649	3858794	2154.19	1211.45	2.745	2.245	0	0.035	0	0	Dis	FBgn0038523	Sgs5bis
MI431	MI431-RB	chr2	chr2	-	3858063	3858782	2154.19	1211.45	2.745	2.245	0	0.035	0	0	Dis	FBgn0038523	Sgs5bis
MI431	MI431-RC	chr2	chr2	-	3858063	3858782	2154.19	1211.45	2.745	2.245	0	0.035	0	0	Dis	FBgn0038523	Sgs5bis
MI431	MI431-RD	chr2	chr2	-	3858063	3858794	2154.19	1211.45	2.745	2.245	0	0.035	0	0	Dis	FBgn0038523	Sgs5bis
MI432	MI432-RA	chr2	chr2	-	3875821	3879513	0.145	0.135	1.27	0.7	0.145	0.15	0	0	Fun	FBgn0264005	Hmx
MI433	MI433-RA	chr2	chr2	-	3879976	3890833	0.09	0.15	0.3	0.435	0.11	0.09	0	0	Sil	FBgn0264005	Hmx
MI434	MI434-RA	chr2	chr2	+	3895064	3900141	11.595	14.68	12.92	20.525	18.46	19.64	9.17	18.545	Fun	FBgn0038519	Prx3
MI435	MI435-RA	chr2	chr2	-	3900081	3904701	6.405	7.675	20.39	30.77	20.855	16.415	32.975	9.43	Fun	FBgn0025571	SF1
MI435	MI435-RB	chr2	chr2	-	3900081	3904701	6.405	7.675	20.39	30.77	20.855	16.415	32.975	9.43	Fun	FBgn0025571	SF1
MI436	MI436-RA	chr2	chr2	+	3904846	3908394	8.38	8.185	27.675	35.085	17.81	21.84	38.355	23.84	Fun	FBgn0040080	pins
MI436	MI436-RB	chr2	chr2	+	3904846	3908400	8.38	8.185	27.675	35.085	17.81	21.84	38.355	23.84	Fun	FBgn0040080	pins
MI437	MI437-RA	chr2	chr2	-	3908931	3920048	1.77	1.82	0.04	0.92	0.43	1.155	0.05	1.09	Fun	FBgn0039527	CG5639
MI438	MI438-RA	chr2	chr2	-	3922598	3931049	4.125	4.11	5.52	8.815	12.485	9.4	12.605	3.64	Fun	FBgn0039528	dsd
MI439	MI439-RA	chr2	chr2	+	3931096	3963743	0.185	0.13	2.335	2.075	1.765	3.335	0.7	2.165	Fun	FBgn0039530	Tusp
MI439	MI439-RB	chr2	chr2	+	3931096	3963897	0.185	0.13	2.335	2.075	1.765	3.335	0.7	2.165	Fun	FBgn0039530	Tusp
MI440	MI440-RA	chr2	chr2	-	3950023	3953413	15.8	20.7	12.56	11.395	44.575	49.185	73.955	16.83	Fun	FBgn0039529	CG5612
MI440	MI440-RB	chr2	chr2	-	3950026	3965009	15.8	20.7	12.56	11.395	44.575	49.185	73.955	16.83	Fun	FBgn0039529	CG5612
MI441	MI441-RA	chr2	chr2	+	3965461	3969221	5.135	5.465	19.74	29.095	12.195	65.145	35.935	113.1	Fun	FBgn0039532	Mtl
MI442	MI442-RA	chr2	chr2	-	3969519	3986234	2.2	2.995	19.425	12.105	20.725	17.36	0.175	1.935	Fun	FBgn0266579	tau
MI442	MI442-RB	chr2	chr2	-	3969519	3986234	2.2	2.995	19.425	12.105	20.725	17.36	0.175	1.935	Fun	FBgn0266579	tau
MI443	MI443-RA	chr2	chr2	-	3986853	3989917	3398.48	5320.88	89.865	6.845	5659.89	4374.3	129.045	22.505	Fun	FBgn0002772	Mlc1
MI443	MI443-RB	chr2	chr2	-	3987202	3989917	3398.48	5320.88	89.865	6.845	5659.89	4374.3	129.045	22.505	Fun	FBgn0002772	Mlc1
MI443	MI443-RC	chr2	chr2	-	3987237	3989917	3398.48	5320.88	89.865	6.845	5659.89	4374.3	129.045	22.505	Fun	FBgn0002772	Mlc1
MI444	MI444-RA	chr2	chr2	+	3991456	4006708	0.6	0.42	0.475	0.55	4.95	2.58	2.9	0.275	Fun	FBgn0039536	unc80
MI445	MI445-RA	chr2	chr2	-	4006549	4008335	6.98	8.395	28.54	38.17	14.195	12.89	27.905	8.32	Fun	FBgn0032321	YL-1
MI446	MI446-RA	chr2	chr2	+	4008204	4011339	79.41	77.205	73.715	51.6	54.925	21.54	50.965	9.17	Fun	FBgn0039537	CG5590
MI446	MI446-RB	chr2	chr2	+	4008204	4012993	79.41	77.205	73.715	51.6	54.925	21.54	50.965	9.17	Fun	FBgn0039537	CG5590
MI446	MI446-RC	chr2	chr2	+	4009484	4012964	79.41	77.205	73.715	51.6	54.925	21.54	50.965	9.17	Fun	FBgn0039537	CG5590
MI446	MI446-RD	chr2	chr2	+	4009514	4011334	79.41	77.205	73.715	51.6	54.925	21.54	50.965	9.17	Fun	FBgn0039537	CG5590
MI447	MI447-RA	chr2	chr2	-	4012854	4014488	6.025	7.765	23.73	37.38	12.77	16.895	32.165	10.32	Fun	FBgn0003330	Sce
MI448	MI448-RA	chr2	chr2	-	4019503	4022320	0	0.145	0.11	72.41	0	176.83	0.02	177.87	Fun	FBgn0051055	CG31055
MI448	MI448-RB	chr2	chr2	-	4019503	4022320	0	0.145	0.11	72.41	0	176.83	0.02	177.87	Fun	FBgn0051055	CG31055
MI448	MI448-RC	chr2	chr2	-	4019503	4022320	0	0.145	0.11	72.41	0	176.83	0.02	177.87	Fun	FBgn0051055	CG31055
MI448	MI448-RD	chr2	chr2	-	4019503	4022320	0	0.145	0.11	72.41	0	176.83	0.02	177.87	Fun	FBgn0051055	CG31055
MI448	MI448-RE	chr2	chr2	-	4019507	4021802	0	0.145	0.11	72.41	0	176.83	0.02	177.87	Fun	FBgn0051055	CG31055
MI449	MI449-RA	chr2	chr2	+	4019672	4026603	4.75	4.09	173.11	102.01	0.365	0.21	0.09	0.05	Fun	FBgn0046258	CG12880
MI450	MI450-RA	chr2	chr2	+	4029190	4032533	46.49	42.295	67.535	111.195	35.665	43.645	31.62	30.555	Fun	FBgn0086346	ALiX
MI450	MI450-RB	chr2	chr2	+	4029192	4032531	46.49	42.295	67.535	111.195	35.665	43.645	31.62	30.555	Fun	FBgn0086346	ALiX
MI451	MI451-RA	chr2	chr2	-	4031833	4034133	4.12	5.43	6.12	15.46	6.155	5.56	8.345	4.35	Fun	FBgn0263025	HSPBAP1
MI452	MI452-RA	chr2	chr2	+	4034011	4037495	6.585	6.695	14.115	17.605	13.555	11.18	15.11	8.095	Fun	FBgn0045862	btz
MI453	MI453-RA	chr2	chr2	-	4037020	4040992	23.055	18.495	10.285	11.03	5.815	7.175	23.74	8.19	Fun	FBgn0039543	CROT
MI453	MI453-RB	chr2	chr2	-	4037020	4041279	23.055	18.495	10.285	11.03	5.815	7.175	23.74	8.19	Fun	FBgn0039543	CROT
MI453	MI453-RC	chr2	chr2	-	4037020	4041279	23.055	18.495	10.285	11.03	5.815	7.175	23.74	8.19	Fun	FBgn0039543	CROT
MI454	MI454-RA	chr2	chr2	+	4040798	4044554	2.16	2.64	5.47	27.605	5.755	65.405	12.81	50.85	Fun	FBgn0039544	CG12877
MI454	MI454-RB	chr2	chr2	+	4040944	4044554	2.16	2.64	5.47	27.605	5.755	65.405	12.81	50.85	Fun	FBgn0039544	CG12877
MI455	MI455-RA	chr2	chr2	+	4054245	4055351	0.77	0.685	1.985	22.21	1.265	16.89	0.545	13.43	Fun	FBgn0004926	eIF2beta
MI456	MI456-RA	chr2	chr2	+	4065217	4078084	1.73	1.31	5.955	3.97	11.615	4.335	0.785	0.24	Fun	FBgn0005659	Ets98B
MI456	MI456-RB	chr2	chr2	+	4065223	4078079	1.73	1.31	5.955	3.97	11.615	4.335	0.785	0.24	Fun	FBgn0005659	Ets98B
MI456	MI456-RC	chr2	chr2	+	4073281	4078084	1.73	1.31	5.955	3.97	11.615	4.335	0.785	0.24	Fun	FBgn0005659	Ets98B
MI457	MI457-RA	chr2	chr2	-	4098776	4236965	0.18	0.155	5.595	2.97	1.805	1.72	0.11	0.1	Fun	FBgn0085382	CG34353
MI457	MI457-RB	chr2	chr2	-	4098800	4208861	0.18	0.155	5.595	2.97	1.805	1.72	0.11	0.1	Fun	FBgn0085382	CG34353
MI458	MI458-RA	chr2	chr2	+	4114247	4116059	0	0	0.025	13.285	0	72.555	0	149.69	Fun	FBgn0027498	CG2061
MI459	MI459-RA	chr2	chr2	-	4119076	4169018	0	0.02	0	0	0	0	0	0	Sil-Dis	FBgn0085382	CG34353
MI460	MI460-RA	chr2	chr2	+	4179119	4180553	0	0	0	0	0	0.065	0	0.04	Sil	FBgn0039551	Or98a
MI461	MI461-RA	chr2	chr2	-	4203199	4204078	0	0	0	1.51	0	9.395	0	74.63	Fun	FBgn0039552	CG12426
MI462	MI462-RA	chr2	chr2	+	4244472	4247196	0	1.825	0.765	349.02	0	643.055	0	1005.8	Fun	FBgn0267366	mil
MI462	MI462-RB	chr2	chr2	+	4244472	4247323	0	1.825	0.765	349.02	0	643.055	0	1005.8	Fun	FBgn0267366	mil
MI463	MI463-RA	chr2	chr2	-	4245057	4250595	3.87	4.605	9.565	11.185	6.03	4.035	12.105	2.665	Fun	FBgn0039554	CG5003
MI463	MI463-RB	chr2	chr2	-	4245701	4250595	3.87	4.605	9.565	11.185	6.03	4.035	12.105	2.665	Fun	FBgn0039554	CG5003
MI463	MI463-RC	chr2	chr2	-	4245768	4250595	3.87	4.605	9.565	11.185	6.03	4.035	12.105	2.665	Fun	FBgn0039554	CG5003
MI464	MI464-RA	chr2	chr2	+	4249438	4251739	7.68	7.44	10.15	10.48	16.65	8.14	13.17	4.965	Fun	FBgn0039555	mRpS22
MI465	MI465-RA	chr2	chr2	-	4251618	4252945	12.82	17.335	32.675	38.975	43.505	31.075	30.575	12.045	Fun	FBgn0053213	CG33213
MI466	MI466-RA	chr2	chr2	+	4253232	4255012	6.715	5.855	18.205	21.745	14.57	9.255	23.1	9.6	Fun	FBgn0001491	l(1)10Bb
MI467	MI467-RA	chr2	chr2	-	4254016	4257163	64.165	62.905	65.8	53.33	64.36	52.045	91.07	19.405	Fun	FBgn0019925	Surf4
MI468	MI468-RA	chr2	chr2	+	4256662	4259243	12.15	13.57	21.015	36.455	34.45	28.24	69.565	28.49	Dis	FBgn0031008	CG8010
MI468	MI468-RB	chr2	chr2	+	4256662	4259243	12.15	13.57	21.015	36.455	34.45	28.24	69.565	28.49	Dis	FBgn0031008	CG8010
MI468	MI468-RC	chr2	chr2	+	4256662	4259248	12.15	13.57	21.015	36.455	34.45	28.24	69.565	28.49	Dis	FBgn0031008	CG8010
MI468	MI468-RD	chr2	chr2	+	4256664	4259212	12.15	13.57	21.015	36.455	34.45	28.24	69.565	28.49	Dis	FBgn0031008	CG8010
MI468	MI468-RE	chr2	chr2	+	4256664	4259212	12.15	13.57	21.015	36.455	34.45	28.24	69.565	28.49	Dis	FBgn0031008	CG8010
MI469	MI469-RA	chr2	chr2	+	4259587	4261687	18.38	17.59	58.515	47.35	50.135	18.97	65.59	8.615	Fun	FBgn0051301	CG31301
MI469	MI469-RB	chr2	chr2	+	4259587	4261687	18.38	17.59	58.515	47.35	50.135	18.97	65.59	8.615	Fun	FBgn0051301	CG31301
MI469	MI469-RC	chr2	chr2	+	4259587	4261687	18.38	17.59	58.515	47.35	50.135	18.97	65.59	8.615	Fun	FBgn0051301	CG31301
MI470	MI470-RA	chr2	chr2	+	4261747	4264756	1.28	1.13	5.955	5.37	4.13	2.77	1.7	1.15	Fun	FBgn0261679	CG42726
MI471	MI471-RA	chr2	chr2	-	4263224	4264913	4.885	4.775	7.18	14.055	7.015	14.15	14.41	24.46	Fun	FBgn0266722	Trs33
MI472	MI472-RA	chr2	chr2	-	4267428	4271006	4.345	3.335	8.805	8.36	9.235	4.9	17.63	2.475	Fun	FBgn0038325	Atg4b
MI473	MI473-RA	chr2	chr2	+	4270135	4272967	17.71	21.26	10.325	10.065	34.515	14.855	24.075	3.29	Fun	FBgn0038326	CG5044
MI474	MI474-RA	chr2	chr2	-	4272703	4275396	4.645	4.55	8.22	11.165	12.39	9.93	25.125	6.97	Fun	FBgn0026634	Cog2
MI475	MI475-RA	chr2	chr2	+	4275399	4279588	16.87	17.035	41.305	55.14	27.395	44.24	46.245	59.56	Fun	FBgn0038327	Trax
MI475	MI475-RB	chr2	chr2	+	4275399	4279622	16.87	17.035	41.305	55.14	27.395	44.24	46.245	59.56	Fun	FBgn0038327	Trax
MI476	MI476-RA	chr2	chr2	-	4276471	4280767	5.905	6.4	14.835	49.31	11.49	44.275	41.98	51.555	Fun	FBgn0026737	CG6171
MI476	MI476-RB	chr2	chr2	-	4276471	4280767	5.905	6.4	14.835	49.31	11.49	44.275	41.98	51.555	Fun	FBgn0026737	CG6171
MI476	MI476-RC	chr2	chr2	-	4276471	4280775	5.905	6.4	14.835	49.31	11.49	44.275	41.98	51.555	Fun	FBgn0026737	CG6171
MI476	MI476-RD	chr2	chr2	-	4276471	4280775	5.905	6.4	14.835	49.31	11.49	44.275	41.98	51.555	Fun	FBgn0026737	CG6171
MI476	MI476-RE	chr2	chr2	-	4276479	4277685	5.905	6.4	14.835	49.31	11.49	44.275	41.98	51.555	Fun	FBgn0026737	CG6171
MI476	MI476-RF	chr2	chr2	-	4279544	4280767	5.905	6.4	14.835	49.31	11.49	44.275	41.98	51.555	Fun	FBgn0026737	CG6171
MI476	MI476-RG	chr2	chr2	-	4279544	4280767	5.905	6.4	14.835	49.31	11.49	44.275	41.98	51.555	Fun	FBgn0026737	CG6171
MI477	MI477-RA	chr2	chr2	+	4280834	4303258	18.735	16.765	32.845	38.46	11.86	10.345	12.075	8.32	Fun	FBgn0020278	loco
MI477	MI477-RB	chr2	chr2	+	4284909	4303258	18.735	16.765	32.845	38.46	11.86	10.345	12.075	8.32	Fun	FBgn0020278	loco
MI477	MI477-RC	chr2	chr2	+	4284909	4303325	18.735	16.765	32.845	38.46	11.86	10.345	12.075	8.32	Fun	FBgn0020278	loco
MI477	MI477-RD	chr2	chr2	+	4289056	4303258	18.735	16.765	32.845	38.46	11.86	10.345	12.075	8.32	Fun	FBgn0020278	loco
MI477	MI477-RE	chr2	chr2	+	4289145	4303242	18.735	16.765	32.845	38.46	11.86	10.345	12.075	8.32	Fun	FBgn0020278	loco
MI477	MI477-RF	chr2	chr2	+	4295904	4303258	18.735	16.765	32.845	38.46	11.86	10.345	12.075	8.32	Fun	FBgn0020278	loco
MI478	MI478-RA	chr2	chr2	+	4303478	4305999	0.015	0.065	0.115	0.22	0.145	109.215	0.14	81.115	Fun	FBgn0262009	CG42827
MI479	MI479-RA	chr2	chr2	+	4304188	4304637	0	0	0	0	0.085	0	0	0	Sil	FBgn0262009	CG42827
MI480	MI480-RA	chr2	chr2	+	4306122	4306596	0	0	0	0	0	36.25	0	15.77	Dis	FBgn0262009	CG42827
MI481	MI481-RA	chr2	chr2	-	4306595	4308098	9.165	12.745	17.275	33.55	33.94	19.59	31.395	9.755	Fun	FBgn0263863	mRpL45
MI482	MI482-RA	chr2	chr2	-	4308896	4313644	0.61	0.72	2.2	65.725	2.92	439.63	3.295	459.295	Fun	FBgn0267592	CCY
MI482	MI482-RB	chr2	chr2	-	4308896	4316786	0.61	0.72	2.2	65.725	2.92	439.63	3.295	459.295	Fun	FBgn0267592	CCY
MI482	MI482-RC	chr2	chr2	-	4311437	4316786	0.61	0.72	2.2	65.725	2.92	439.63	3.295	459.295	Fun	FBgn0267592	CCY
MI482	MI482-RD	chr2	chr2	-	4311465	4316786	0.61	0.72	2.2	65.725	2.92	439.63	3.295	459.295	Fun	FBgn0267592	CCY
MI483	MI483-RA	chr2	chr2	+	4312626	4312891	0	0	0	4.605	0	0.34	0	1.705	Dis
MI484	MI484-RA	chr2	chr2	+	4315208	4321721	1.21	1.195	4.215	4.795	4.61	2.005	11.625	1.845	Fun	FBgn0051156	CG31156
MI485	MI485-RA	chr2	chr2	-	4319302	4320568	0	0.2	0.035	57.815	0.03	112.98	0	167.435	Fun	FBgn0038993	CG13843
MI486	MI486-RA	chr2	chr2	-	4321087	4341526	3.54	4.14	20.165	19.395	18.795	12.92	21.585	5.245	Fun	FBgn0051158	Efa6
MI486	MI486-RB	chr2	chr2	-	4321174	4341513	3.54	4.14	20.165	19.395	18.795	12.92	21.585	5.245	Fun	FBgn0051158	Efa6
MI487	MI487-RA	chr2	chr2	+	4344107	4346589	3.15	3.47	5.805	12.76	10.46	9.475	21.205	8.4	Fun	FBgn0037679	Aduk
MI488	MI488-RA	chr2	chr2	+	4346748	4347737	71.565	51.33	0	0.09	8.405	3.265	0	0	Fun	FBgn0037678	CG16749
MI489	MI489-RA	chr2	chr2	+	4348650	4378091	0.255	0.36	2.985	1.37	4.165	3.885	0	0.03	Fun	FBgn0037676	CG8861
MI490	MI490-RA	chr2	chr2	-	4399396	4403930	0	0.01	0.025	0.01	0.08	0.115	0	0	Sil	FBgn0039833	CG15564
MI491	MI491-RA	chr2	chr2	-	4404812	4423678	3.05	3.935	3.375	3.64	15.07	7.99	9.845	0.9	Fun	FBgn0051005	qless
MI492	MI492-RA	chr2	chr2	+	4423713	4424813	6.72	10.72	18.875	25.81	26.485	12.29	44.59	12.54	Fun	FBgn0039835	mRpL32
MI493	MI493-RA	chr2	chr2	-	4424744	4426092	3.52	4.785	7.22	8.04	8.445	5.665	5.39	2.365	Fun	FBgn0039836	CG1750
MI494	MI494-RA	chr2	chr2	+	4426381	4428593	7.795	7.075	14.39	30.265	11.76	27.01	20.11	27.615	Fun	FBgn0086362	spn-F
MI495	MI495-RA	chr2	chr2	+	4429371	4431493	0	0	0.115	0.065	0.945	0.68	0.13	0	Sil	FBgn0039838	CAH6
MI496	MI496-RA	chr2	chr2	+	4433104	4434515	0	0	119.605	2.515	0.095	0.065	0	0	Fun	FBgn0040629	CAH5
MI497	MI497-RA	chr2	chr2	+	4436723	4440508	0	0	0	2.81	0	9.4	0	13.41	Fun	FBgn0039839	ppk24
MI498	MI498-RA	chr2	chr2	-	4442191	4448480	0.14	0	0.26	0	0.365	0.03	0.145	0	Fun
MI499	MI499-RA	chr2	chr2	-	4474831	4477533	4.135	4.735	0.105	0.335	2.57	2.545	0.025	0.17	Fun	FBgn0039840	pHCl-2
MI500	MI500-RA	chr2	chr2	+	4483823	4544059	0.675	0.85	8.615	4.88	3.61	1.595	3.54	0.585	Fun	FBgn0085376	CG34347
MI500	MI500-RB	chr2	chr2	+	4483827	4544003	0.675	0.85	8.615	4.88	3.61	1.595	3.54	0.585	Fun	FBgn0085376	CG34347
MI500	MI500-RC	chr2	chr2	+	4483827	4544003	0.675	0.85	8.615	4.88	3.61	1.595	3.54	0.585	Fun	FBgn0085376	CG34347
MI501	MI501-RA	chr2	chr2	+	4545294	4547658	0	1.33	0	33.375	0.015	101.235	0	178.91	Fun	FBgn0046332	gskt
MI502	MI502-RA	chr2	chr2	+	4556855	4566368	27.25	20.905	27.75	18.965	18.065	9.945	0.155	0.265	Fun	FBgn0039844	CG1607
MI502	MI502-RB	chr2	chr2	+	4558879	4566368	27.25	20.905	27.75	18.965	18.065	9.945	0.155	0.265	Fun	FBgn0039844	CG1607
MI503	MI503-RA	chr2	chr2	-	4566266	4568624	0.015	0.05	0	15.395	0.325	118.22	0.375	200.74	Fun	FBgn0051204	CG31204
MI503	MI503-RB	chr2	chr2	-	4566266	4568624	0.015	0.05	0	15.395	0.325	118.22	0.375	200.74	Fun	FBgn0051204	CG31204
MI504	MI504-RA	chr2	chr2	+	4568966	4575039	2.495	2.46	3.53	12.115	6	12.545	8.87	10.625	Fun	FBgn0019990	Gcn2
MI504	MI504-RB	chr2	chr2	+	4568987	4575025	2.495	2.46	3.53	12.115	6	12.545	8.87	10.625	Fun	FBgn0019990	Gcn2
MI505	MI505-RA	chr2	chr2	-	4574284	4577928	8.63	11.16	7.815	22	17.675	24.705	27.815	42.77	Fun	FBgn0039846	PNPase
MI505	MI505-RB	chr2	chr2	-	4574284	4578016	8.63	11.16	7.815	22	17.675	24.705	27.815	42.77	Fun	FBgn0039846	PNPase
MI505	MI505-RC	chr2	chr2	-	4574942	4577941	8.63	11.16	7.815	22	17.675	24.705	27.815	42.77	Fun	FBgn0039846	PNPase
MI506	MI506-RA	chr2	chr2	+	4578950	4653098	5.6	5.305	20.39	18.585	10.905	6.2	17.57	3.13	Fun	FBgn0261988	Gprk2
MI506	MI506-RB	chr2	chr2	+	4578978	4653036	5.6	5.305	20.39	18.585	10.905	6.2	17.57	3.13	Fun	FBgn0261988	Gprk2
MI507	MI507-RA	chr2	chr2	-	4653600	4654800	0.03	0.035	0.115	1.555	0.37	0.365	0.36	0.765	Fun	FBgn0039848	Loxl1
MI508	MI508-RA	chr2	chr2	-	4654911	4657698	21.24	17.73	6.27	7.72	31.65	16.19	24.305	7.14	Fun	FBgn0039849	CG11334
MI508	MI508-RB	chr2	chr2	-	4654912	4658084	21.24	17.73	6.27	7.72	31.65	16.19	24.305	7.14	Fun	FBgn0039849	CG11334
MI509	MI509-RA	chr2	chr2	+	4656607	4657988	0	0.03	0	0.405	0.06	1.61	0	2.45	Fun
MI510	MI510-RA	chr2	chr2	+	4659080	4660023	0	0	0	33.72	0	122.415	0	513.98	Fun	FBgn0039850	CG11333
MI511	MI511-RA	chr2	chr2	+	4677454	4678834	0	0.205	0	11.715	0	6.115	0	6.325	Fun	FBgn0034423	tbrd-2
MI511	MI511-RB	chr2	chr2	+	4677509	4678829	0	0.205	0	11.715	0	6.115	0	6.325	Fun	FBgn0034423	tbrd-2
MI512	MI512-RA	chr2	chr2	+	4705676	4715130	0.35	0.225	32.7	3.995	0.32	0.615	0.01	0.055	Fun	FBgn0039851	mey
MI513	MI513-RA	chr2	chr2	-	4719285	4738748	0	0	0	0	0	0.005	0	0.01	Sil
MI514	MI514-RA	chr2	chr2	-	4748202	4750528	0	0	0	0	0	0.03	0	0	Sil	FBgn0037836	CG14692
MI515	MI515-RA	chr2	chr2	+	4762572	4789868	0.035	0.02	15.305	3.6	0.015	0.08	0	0.065	Fun	FBgn0039852	nyo
MI515	MI515-RB	chr2	chr2	+	4762572	4789868	0.035	0.02	15.305	3.6	0.015	0.08	0	0.065	Fun	FBgn0039852	nyo
MI516	MI516-RA	chr2	chr2	+	4797084	4800295	15.72	13.57	75.15	55.565	29.255	20.47	92.725	9.235	Fun	FBgn0039465	Tsp97E
MI516	MI516-RB	chr2	chr2	+	4797084	4800295	15.72	13.57	75.15	55.565	29.255	20.47	92.725	9.235	Fun	FBgn0039465	Tsp97E
MI517	MI517-RA	chr2	chr2	-	4802908	4804179	0	0	0	10.56	0	15.365	0.035	41.215	Fun	FBgn0031443	Prosbeta4R2
MI518	MI518-RA	chr2	chr2	+	4804649	4813553	10.035	16.915	29.95	17.13	48.95	35.25	13.505	9.995	Fun	FBgn0039464	CG6330
MI518	MI518-RB	chr2	chr2	+	4809835	4813553	10.035	16.915	29.95	17.13	48.95	35.25	13.505	9.995	Fun	FBgn0039464	CG6330
MI519	MI519-RA	chr2	chr2	+	4813833	4815282	0	0.065	0	9.625	0	9.585	0	39.175	Fun
MI520	MI520-RA	chr2	chr2	+	4816020	4818274	0.575	0.71	2.665	6.895	1.77	16.47	5.74	31.53	Fun	FBgn0031489	CG17224
MI520	MI520-RB	chr2	chr2	+	4816020	4818467	0.575	0.71	2.665	6.895	1.77	16.47	5.74	31.53	Fun	FBgn0031489	CG17224
MI521	MI521-RA	chr2	chr2	-	4817995	4820741	0	0.23	0.015	32.16	0.015	29.21	0	26.265	Fun	FBgn0039463	Spag1
MI521	MI521-RB	chr2	chr2	-	4817995	4820741	0	0.23	0.015	32.16	0.015	29.21	0	26.265	Fun	FBgn0039463	Spag1
MI522	MI522-RA	chr2	chr2	-	4820952	4822724	2.395	2.96	9.755	21.47	7.43	13.425	23.585	10.11	Dis	FBgn0039462	CG14252
MI522	MI522-RB	chr2	chr2	-	4820986	4822646	2.395	2.96	9.755	21.47	7.43	13.425	23.585	10.11	Dis	FBgn0039462	CG14252
MI523	MI523-RA	chr2	chr2	-	4823387	4854486	10.415	10.39	4.53	3.98	24.18	12.39	17.97	1.165	Fun	FBgn0285963	CG46339
MI523	MI523-RB	chr2	chr2	-	4823387	4854499	10.415	10.39	4.53	3.98	24.18	12.39	17.97	1.165	Fun	FBgn0285963	CG46339
MI523	MI523-RC	chr2	chr2	-	4823387	4854499	10.415	10.39	4.53	3.98	24.18	12.39	17.97	1.165	Fun	FBgn0285963	CG46339
MI524	MI524-RA	chr2	chr2	+	4859871	4862036	3.975	4.42	11.1	9.86	15.615	3.315	25.635	1.725	Fun	FBgn0004510	Ets97D
MI525	MI525-RA	chr2	chr2	-	4861708	4901227	1.995	1.975	5.42	3.97	8.41	4.075	29.85	2.94	Fun	FBgn0004359	T48
MI526	MI526-RA	chr2	chr2	-	4904789	4909305	7.56	5.745	12	24.875	77.72	119.425	37.705	328.98	Fun	FBgn0039461	CG5500
MI526	MI526-RB	chr2	chr2	-	4904791	4909188	7.56	5.745	12	24.875	77.72	119.425	37.705	328.98	Fun	FBgn0039461	CG5500
MI526	MI526-RC	chr2	chr2	-	4904791	4909188	7.56	5.745	12	24.875	77.72	119.425	37.705	328.98	Fun	FBgn0039461	CG5500
MI527	MI527-RA	chr2	chr2	+	4909506	4913916	2.65	2.87	8.535	7.56	7.525	4.175	13.06	2.3	Fun	FBgn0004903	Rb97D
MI527	MI527-RB	chr2	chr2	+	4909506	4913916	2.65	2.87	8.535	7.56	7.525	4.175	13.06	2.3	Fun	FBgn0004903	Rb97D
MI527	MI527-RC	chr2	chr2	+	4909556	4913910	2.65	2.87	8.535	7.56	7.525	4.175	13.06	2.3	Fun	FBgn0004903	Rb97D
MI527	MI527-RD	chr2	chr2	+	4909556	4913910	2.65	2.87	8.535	7.56	7.525	4.175	13.06	2.3	Fun	FBgn0004903	Rb97D
MI527	MI527-RE	chr2	chr2	+	4909683	4913141	2.65	2.87	8.535	7.56	7.525	4.175	13.06	2.3	Fun	FBgn0004903	Rb97D
MI527	MI527-RF	chr2	chr2	+	4909695	4913879	2.65	2.87	8.535	7.56	7.525	4.175	13.06	2.3	Fun	FBgn0004903	Rb97D
MI528	MI528-RA	chr2	chr2	+	4914033	4916957	386.34	487.735	158	101.235	190.295	57.74	16.36	9.4	Fun	FBgn0026562	SPARC
MI528	MI528-RB	chr2	chr2	+	4914076	4916957	386.34	487.735	158	101.235	190.295	57.74	16.36	9.4	Fun	FBgn0026562	SPARC
MI529	MI529-RA	chr2	chr2	-	4916877	4918751	78.49	69.85	208.06	146.5	159.53	23.405	328.09	16.665	Fun	FBgn0001197	His2Av
MI530	MI530-RA	chr2	chr2	-	4919510	4923959	0.71	3.89	0.665	31.2	0.79	17.825	4.335	63.49	Fun	FBgn0024807	DIP1
MI530	MI530-RB	chr2	chr2	-	4919510	4924700	0.71	3.89	0.665	31.2	0.79	17.825	4.335	63.49	Fun	FBgn0024807	DIP1
MI530	MI530-RC	chr2	chr2	-	4919515	4924700	0.71	3.89	0.665	31.2	0.79	17.825	4.335	63.49	Fun	FBgn0024807	DIP1
MI531	MI531-RA	chr2	chr2	+	4920249	4927016	5.07	8.685	19.09	70.38	9.56	30.02	39.17	44.305	Fun	FBgn0027889	ball
MI531	MI531-RB	chr2	chr2	+	4920497	4927016	5.07	8.685	19.09	70.38	9.56	30.02	39.17	44.305	Fun	FBgn0027889	ball
MI531	MI531-RC	chr2	chr2	+	4920497	4927016	5.07	8.685	19.09	70.38	9.56	30.02	39.17	44.305	Fun	FBgn0027889	ball
MI531	MI531-RD	chr2	chr2	+	4920599	4927006	5.07	8.685	19.09	70.38	9.56	30.02	39.17	44.305	Fun	FBgn0027889	ball
MI531	MI531-RE	chr2	chr2	+	4920599	4927006	5.07	8.685	19.09	70.38	9.56	30.02	39.17	44.305	Fun	FBgn0027889	ball
MI531	MI531-RF	chr2	chr2	+	4920599	4927016	5.07	8.685	19.09	70.38	9.56	30.02	39.17	44.305	Fun	FBgn0027889	ball
MI531	MI531-RG	chr2	chr2	+	4920604	4927006	5.07	8.685	19.09	70.38	9.56	30.02	39.17	44.305	Fun	FBgn0027889	ball
MI532	MI532-RA	chr2	chr2	-	4926989	4928771	3.415	3.19	5.33	6.63	4.275	4.35	14.65	4.41	Fun	FBgn0039459	IntS12
MI533	MI533-RA	chr2	chr2	+	4928182	4950989	37.655	30.49	6.225	7.48	19.14	11.425	11.95	4.805	Fun	FBgn0051072	Lerp
MI533	MI533-RB	chr2	chr2	+	4928263	4950989	37.655	30.49	6.225	7.48	19.14	11.425	11.95	4.805	Fun	FBgn0051072	Lerp
MI534	MI534-RA	chr2	chr2	-	4932263	4933295	0	1.79	0	14	0	2.58	0	4.14	Fun
MI534	MI534-RB	chr2	chr2	-	4932263	4933615	0	1.79	0	14	0	2.58	0	4.14	Fun
MI535	MI535-RA	chr2	chr2	-	4951675	5001177	4.95	4.795	19.985	12.175	23.995	4.725	62.31	1.145	Fun	FBgn0262473	Tl
MI536	MI536-RA	chr2	chr2	-	5055960	5058431	0	1.915	0	45.95	0	35.97	0	40.845	Fun	FBgn0039710	dgt1
MI536	MI536-RB	chr2	chr2	-	5055960	5058431	0	1.915	0	45.95	0	35.97	0	40.845	Fun	FBgn0039710	dgt1
MI537	MI537-RA	chr2	chr2	-	5068230	5069263	11.295	6.17	0.215	0.11	0.685	0.19	0	0	Fun	FBgn0039454	CG14247
MI538	MI538-RA	chr2	chr2	+	5070626	5071392	211.485	110.555	0.07	0.13	0.185	0.06	0	0.16	Fun	FBgn0039453	CG6403
MI538	MI538-RB	chr2	chr2	+	5070648	5071392	211.485	110.555	0.07	0.13	0.185	0.06	0	0.16	Fun	FBgn0039453	CG6403
MI539	MI539-RA	chr2	chr2	-	5077055	5078058	0.65	0.39	3.1	0.855	19.67	26.015	0	0	Fun	FBgn0040608	CG14246
MI539	MI539-RB	chr2	chr2	-	5077548	5080074	0.65	0.39	3.1	0.855	19.67	26.015	0	0	Fun	FBgn0040608	CG14246
MI540	MI540-RA	chr2	chr2	-	5078209	5078689	257.21	414.05	10.445	5.565	91.23	285.345	0	4.74	Fun	FBgn0039452	CG14245
MI541	MI541-RA	chr2	chr2	-	5081221	5081844	0.085	0.095	2994.48	1937.11	0.29	1.88	0	2.665	Fun	FBgn0040607	CG14244
MI541	MI541-RB	chr2	chr2	-	5081221	5082277	0.085	0.095	2994.48	1937.11	0.29	1.88	0	2.665	Fun	FBgn0040607	CG14244
MI542	MI542-RA	chr2	chr2	+	5081228	5081770	0	0	6.605	1.33	0	0	0	0	Dis
MI543	MI543-RA	chr2	chr2	+	5086453	5093049	5.34	5.735	12.245	34.775	10.845	80.12	25.505	80.43	Dis	FBgn0266465	GckIII
MI544	MI544-RA	chr2	chr2	-	5091325	5166964	122.35	175.235	17.57	12.765	52.13	24.01	29.355	2.7	Fun
MI544	MI544-RB	chr2	chr2	-	5092476	5096448	122.35	175.235	17.57	12.765	52.13	24.01	29.355	2.7	Fun
MI545	MI545-RA	chr2	chr2	+	5098043	5156629	0.025	0.23	0.075	17.75	0.035	23.61	0.03	22.535	Fun	FBgn0086356	tum
MI544	MI544-RC	chr2	chr2	-	5109558	5128379	122.35	175.235	17.57	12.765	52.13	24.01	29.355	2.7	Fun
MI546	MI546-RA	chr2	chr2	+	5129792	5133946	3.41	23.02	0	0.2	0	0.22	0	1.34	Fun
MI547	MI547-RA	chr2	chr2	-	5135656	5163826	58.98	116.355	0.21	0.245	37.615	18.56	0	0.24	Fun	FBgn0038481	CG17475
MI547	MI547-RB	chr2	chr2	-	5135656	5178760	58.98	116.355	0.21	0.245	37.615	18.56	0	0.24	Fun	FBgn0038481	CG17475
MI544	MI544-RD	chr2	chr2	-	5137190	5149274	122.35	175.235	17.57	12.765	52.13	24.01	29.355	2.7	Fun
MI545	MI545-RB	chr2	chr2	+	5145127	5166425	0.025	0.23	0.075	17.75	0.035	23.61	0.03	22.535	Fun	FBgn0086356	tum
MI545	MI545-RC	chr2	chr2	+	5145276	5166425	0.025	0.23	0.075	17.75	0.035	23.61	0.03	22.535	Fun	FBgn0086356	tum
MI547	MI547-RC	chr2	chr2	-	5152374	5178760	58.98	116.355	0.21	0.245	37.615	18.56	0	0.24	Fun	FBgn0038481	CG17475
MI547	MI547-RD	chr2	chr2	-	5152657	5178760	58.98	116.355	0.21	0.245	37.615	18.56	0	0.24	Fun	FBgn0038481	CG17475
MI547	MI547-RE	chr2	chr2	-	5163081	5178756	58.98	116.355	0.21	0.245	37.615	18.56	0	0.24	Fun	FBgn0038481	CG17475
MI547	MI547-RF	chr2	chr2	-	5163081	5178760	58.98	116.355	0.21	0.245	37.615	18.56	0	0.24	Fun	FBgn0038481	CG17475
MI548	MI548-RA	chr2	chr2	+	5175971	5177845	44.54	45.725	0.065	0	12.655	5.155	0	0.145	Fun	FBgn0051265	CG31265
MI549	MI549-RA	chr2	chr2	-	5179544	5180552	22.81	8.32	0	0	11.915	3.35	0	0	Dis	FBgn0038482	CG4053
MI550	MI550-RA	chr2	chr2	+	5180977	5182087	71.74	88.92	0	0.15	47.355	14.86	0	0.305	Fun	FBgn0051266	CG31266
MI551	MI551-RA	chr2	chr2	+	5182197	5184497	44.04	77.12	0.095	0.14	20.4	10.86	0	0	Fun	FBgn0051267	CG31267
MI552	MI552-RA	chr2	chr2	+	5185149	5186569	166.955	162.965	0.06	0.025	14.6	5.125	0	0.16	Fun	FBgn0038484	CG5246
MI553	MI553-RA	chr2	chr2	+	5186845	5187836	4.235	5.69	3.075	7.23	0	0.85	0.05	0.505	Dis	FBgn0038485	CG5255
MI554	MI554-RA	chr2	chr2	+	5187935	5188939	0	0.04	0	0.035	0	29.665	0	1.09	Dis	FBgn0038485	CG5255
MI555	MI555-RA	chr2	chr2	-	5192814	5194070	0	0	0	16.035	0	18.42	0	33.11	Dis	FBgn0037788	CAH7
MI556	MI556-RA	chr2	chr2	-	5196574	5202988	34.93	22.78	208.975	98.645	44.745	37.565	3.215	4.325	Fun	FBgn0037788	CAH7
MI557	MI557-RA	chr2	chr2	+	5206597	5214581	12.2	13.83	36.96	53.675	37.485	37.545	47.99	22.39	Fun	FBgn0028734	Fmr1
MI557	MI557-RB	chr2	chr2	+	5206623	5214581	12.2	13.83	36.96	53.675	37.485	37.545	47.99	22.39	Fun	FBgn0028734	Fmr1
MI558	MI558-RA	chr2	chr2	-	5216014	5223235	0.035	0.06	0.17	0.09	2.185	1.71	0.39	0.03	Fun
MI559	MI559-RA	chr2	chr2	-	5226045	5234486	1.525	1.21	1.725	1.905	4.77	2.45	1.6	0.235	Dis
MI559	MI559-RB	chr2	chr2	-	5226146	5232901	1.525	1.21	1.725	1.905	4.77	2.45	1.6	0.235	Dis
MI559	MI559-RC	chr2	chr2	-	5226156	5234474	1.525	1.21	1.725	1.905	4.77	2.45	1.6	0.235	Dis
MI560	MI560-RA	chr2	chr2	-	5244534	5248903	0.01	0.05	0.155	0.145	0.05	0.01	0	0	Sil	FBgn0041105	nerfin-2
MI561	MI561-RA	chr2	chr2	-	5251000	5252133	0	0	0	0	0	0	0	0	Sil-Dis	FBgn0053783	CG33783
MI562	MI562-RA	chr2	chr2	-	5252654	5253613	0	0	0	0	0	0	0	0	Sil	FBgn0053784	CG33784
MI563	MI563-RA	chr2	chr2	-	5253881	5255163	0.035	0.07	0	0	0	0	0	0	Sil	FBgn0053784	CG33784
MI564	MI564-RA	chr2	chr2	-	5261384	5262262	93.56	71.17	0	0.165	0.875	0.135	0	0.28	Fun	FBgn0037783	Npc2c
MI565	MI565-RA	chr2	chr2	+	5267722	5268528	126.94	138.32	0	0.06	49.515	22.445	0	0	Fun	FBgn0037782	Npc2d
MI566	MI566-RA	chr2	chr2	-	5269948	5271654	7.275	4.3	0.08	1.775	32.235	15.285	0.045	5.075	Fun	FBgn0051410	Npc2e
MI567	MI567-RA	chr2	chr2	+	5270013	5274006	14.775	12.855	1.825	7.12	3.785	7.09	8.74	8.955	Fun	FBgn0037781	Fancl
MI568	MI568-RA	chr2	chr2	-	5273530	5276369	8.045	7.255	19.965	33.85	10.915	54.69	17.25	66.99	Fun	FBgn0037780	ohgt
MI568	MI568-RB	chr2	chr2	-	5273562	5276369	8.045	7.255	19.965	33.85	10.915	54.69	17.25	66.99	Fun	FBgn0037780	ohgt
MI569	MI569-RA	chr2	chr2	+	5276192	5277937	63.56	44.155	236.49	145.965	28.435	16.57	21.315	14.25	Fun	FBgn0037779	CG12811
MI570	MI570-RA	chr2	chr2	-	5277726	5279569	3.715	3.805	5.97	3.97	7.21	2.27	8.8	0.9	Fun	FBgn0037778	mtTFB2
MI571	MI571-RA	chr2	chr2	+	5279656	5280724	7.66	7.005	11.16	19.825	28.83	13.605	24.19	6.375	Fun	FBgn0037777	CG11722
MI571	MI571-RB	chr2	chr2	+	5279656	5280725	7.66	7.005	11.16	19.825	28.83	13.605	24.19	6.375	Fun	FBgn0037777	CG11722
MI572	MI572-RA	chr2	chr2	-	5280695	5282160	23.155	24.18	49.91	70.595	33.045	51.015	97.97	98.315	Fun	FBgn0027524	CG3909
MI573	MI573-RA	chr2	chr2	+	5284140	5337089	2.925	2.66	66.41	138.545	14.22	16.67	8.815	24.4	Dis	FBgn0053208	Mical
MI573	MI573-RB	chr2	chr2	+	5310348	5337089	2.925	2.66	66.41	138.545	14.22	16.67	8.815	24.4	Dis	FBgn0053208	Mical
MI573	MI573-RC	chr2	chr2	+	5311004	5328172	2.925	2.66	66.41	138.545	14.22	16.67	8.815	24.4	Dis	FBgn0053208	Mical
MI573	MI573-RD	chr2	chr2	+	5311004	5337088	2.925	2.66	66.41	138.545	14.22	16.67	8.815	24.4	Dis	FBgn0053208	Mical
MI573	MI573-RE	chr2	chr2	+	5311004	5337088	2.925	2.66	66.41	138.545	14.22	16.67	8.815	24.4	Dis	FBgn0053208	Mical
MI573	MI573-RF	chr2	chr2	+	5311004	5337088	2.925	2.66	66.41	138.545	14.22	16.67	8.815	24.4	Dis	FBgn0053208	Mical
MI573	MI573-RG	chr2	chr2	+	5311004	5337089	2.925	2.66	66.41	138.545	14.22	16.67	8.815	24.4	Dis	FBgn0053208	Mical
MI573	MI573-RH	chr2	chr2	+	5311004	5337089	2.925	2.66	66.41	138.545	14.22	16.67	8.815	24.4	Dis	FBgn0053208	Mical
MI573	MI573-RI	chr2	chr2	+	5311004	5337089	2.925	2.66	66.41	138.545	14.22	16.67	8.815	24.4	Dis	FBgn0053208	Mical
MI573	MI573-RJ	chr2	chr2	+	5313676	5337086	2.925	2.66	66.41	138.545	14.22	16.67	8.815	24.4	Dis	FBgn0053208	Mical
MI574	MI574-RA	chr2	chr2	+	5337728	5339482	1.99	1.94	10.55	7.08	7.655	3.755	41.55	2.35	Fun	FBgn0037773	CG5359
MI574	MI574-RB	chr2	chr2	+	5337872	5339482	1.99	1.94	10.55	7.08	7.655	3.755	41.55	2.35	Fun	FBgn0037773	CG5359
MI574	MI574-RC	chr2	chr2	+	5338038	5339479	1.99	1.94	10.55	7.08	7.655	3.755	41.55	2.35	Fun	FBgn0037773	CG5359
MI575	MI575-RA	chr2	chr2	+	5342354	5345440	0	0	0.025	0.04	0.02	0.045	0	0	Sil	FBgn0045473	Gr85a
MI576	MI576-RA	chr2	chr2	-	5353171	5417346	5.78	5.355	27.515	15.235	28.295	19.225	5.975	1.365	Fun	FBgn0267336	Glut4EF
MI576	MI576-RB	chr2	chr2	-	5353171	5417612	5.78	5.355	27.515	15.235	28.295	19.225	5.975	1.365	Fun	FBgn0267336	Glut4EF
MI576	MI576-RC	chr2	chr2	-	5353190	5473782	5.78	5.355	27.515	15.235	28.295	19.225	5.975	1.365	Fun	FBgn0267336	Glut4EF
MI577	MI577-RA	chr2	chr2	+	5358879	5362530	5.27	5.595	18.175	22.8	18.575	6.31	41.09	4.76	Fun	FBgn0037770	Art4
MI578	MI578-RA	chr2	chr2	-	5479535	5480506	0.22	0.19	0	1.17	0.305	1.65	0	3.8	Fun
MI579	MI579-RA	chr2	chr2	+	5483693	5499317	48.015	48.09	61.82	71.465	92.945	73.855	37.065	28.59	Fun	FBgn0022344	CG10340
MI580	MI580-RA	chr2	chr2	-	5485207	5487102	1.225	2.12	5.4	1.68	8.24	5.55	0	0.025	Fun	FBgn0038449	CG17562
MI581	MI581-RA	chr2	chr2	-	5487543	5491891	3.25	5.32	5.85	5.015	35.87	34.755	1.195	0.85	Fun	FBgn0038450	CG17560
MI582	MI582-RA	chr2	chr2	-	5491957	5494158	22.56	18.24	34.335	32.835	19.56	3.445	4.785	0.445	Fun	FBgn0038449	CG17562
MI579	MI579-RB	chr2	chr2	+	5497732	5501391	48.015	48.09	61.82	71.465	92.945	73.855	37.065	28.59	Fun	FBgn0022344	CG10340
MI579	MI579-RC	chr2	chr2	+	5498032	5501391	48.015	48.09	61.82	71.465	92.945	73.855	37.065	28.59	Fun	FBgn0022344	CG10340
MI583	MI583-RA	chr2	chr2	-	5501397	5502788	1.4	2.51	0.65	0.43	4.59	3.365	0.075	0	Fun	FBgn0027109	NPF
MI584	MI584-RA	chr2	chr2	+	5506976	5514183	1.48	1.28	0.045	0.515	15.98	11.06	0	0.235	Fun	FBgn0027562	CG10345
MI584	MI584-RB	chr2	chr2	+	5507005	5514183	1.48	1.28	0.045	0.515	15.98	11.06	0	0.235	Fun	FBgn0027562	CG10345
MI585	MI585-RA	chr2	chr2	-	5514188	5520451	0	0.01	0.04	0.02	0.04	0.075	0	0.025	Sil	FBgn0038447	CG14892
MI586	MI586-RA	chr2	chr2	+	5525850	5534891	23.965	25.205	5.72	1.62	93.46	68.005	0	0.305	Fun	FBgn0020907	Scp2
MI587	MI587-RA	chr2	chr2	+	5540407	5541402	4.825	4.675	4.405	3.775	8.57	3.935	32.675	3.68	Fun	FBgn0038446	CG14903
MI588	MI588-RA	chr2	chr2	-	5541020	5603003	1.915	1.885	22.145	19.22	3.245	7.93	0.37	7.27	Dis	FBgn0259244	CG42342
MI588	MI588-RB	chr2	chr2	-	5541020	5603003	1.915	1.885	22.145	19.22	3.245	7.93	0.37	7.27	Dis	FBgn0259244	CG42342
MI588	MI588-RC	chr2	chr2	-	5541020	5603003	1.915	1.885	22.145	19.22	3.245	7.93	0.37	7.27	Dis	FBgn0259244	CG42342
MI588	MI588-RD	chr2	chr2	-	5541020	5603003	1.915	1.885	22.145	19.22	3.245	7.93	0.37	7.27	Dis	FBgn0259244	CG42342
MI588	MI588-RE	chr2	chr2	-	5541020	5603003	1.915	1.885	22.145	19.22	3.245	7.93	0.37	7.27	Dis	FBgn0259244	CG42342
MI588	MI588-RF	chr2	chr2	-	5541044	5603012	1.915	1.885	22.145	19.22	3.245	7.93	0.37	7.27	Dis	FBgn0259244	CG42342
MI588	MI588-RG	chr2	chr2	-	5541044	5603012	1.915	1.885	22.145	19.22	3.245	7.93	0.37	7.27	Dis	FBgn0259244	CG42342
MI588	MI588-RH	chr2	chr2	-	5541044	5603012	1.915	1.885	22.145	19.22	3.245	7.93	0.37	7.27	Dis	FBgn0259244	CG42342
MI588	MI588-RI	chr2	chr2	-	5541044	5603012	1.915	1.885	22.145	19.22	3.245	7.93	0.37	7.27	Dis	FBgn0259244	CG42342
MI588	MI588-RJ	chr2	chr2	-	5543539	5561124	1.915	1.885	22.145	19.22	3.245	7.93	0.37	7.27	Dis	FBgn0259244	CG42342
MI589	MI589-RA	chr2	chr2	+	5605758	5606994	61.32	54.155	0.08	0.375	21.59	12.44	0	0.65	Fun	FBgn0028381	Decay
MI590	MI590-RA	chr2	chr2	-	5606966	5608697	0.04	0.065	0	0.385	0	1.45	0	5.56	Fun
MI591	MI591-RA	chr2	chr2	-	5621564	5622539	5.3	9.415	2.525	2.045	0.25	0.255	0.755	0.06	Fun	FBgn0042206	GstD10
MI592	MI592-RA	chr2	chr2	-	5623042	5624054	6.79	9.075	26.115	21.095	39.945	14.745	58.775	7.215	Fun	FBgn0038020	GstD9
MI593	MI593-RA	chr2	chr2	-	5624102	5626024	307.37	324.395	375.22	325.995	210.075	169.725	350.63	226.84	Fun	FBgn0001149	GstD1
MI594	MI594-RA	chr2	chr2	+	5624116	5624885	0	0.06	2.22	0.48	0.11	0.055	0	0	Dis
MI595	MI595-RA	chr2	chr2	+	5626578	5629278	37.665	35.51	36.645	27.345	25.61	35.35	4.33	97.015	Fun	FBgn0010038	GstD2
MI596	MI596-RA	chr2	chr2	+	5630343	5631103	2.655	1.575	5.59	4.03	0.11	0	0	0.13	Fun	FBgn0010040	GstD4
MI597	MI597-RA	chr2	chr2	+	5631983	5632763	102.28	57.145	26.62	25.11	5.18	2.07	0.225	0.225	Fun	FBgn0010040	GstD4
MI598	MI598-RA	chr2	chr2	+	5634315	5635086	9.225	9.815	0.615	0.595	4.27	2.025	11.34	0.075	Fun	FBgn0010044	GstD8
MI599	MI599-RA	chr2	chr2	-	5636110	5637545	0	0	0.105	0.275	0.05	0.25	0	0	Sil	FBgn0038028	CG10035
MI600	MI600-RA	chr2	chr2	-	5638517	5639194	0	0	0	2.065	0	2.555	0	4.145	Fun
MI601	MI601-RA	chr2	chr2	+	5641029	5642534	0.025	0.03	0.03	0	25.615	29.98	0	0	Fun	FBgn0053098	CG33098
MI602	MI602-RA	chr2	chr2	+	5643227	5658268	25.415	31.46	11.67	11.215	36.435	12.66	27.055	4.475	Fun	FBgn0038038	Sccpdh2
MI602	MI602-RB	chr2	chr2	+	5643227	5658268	25.415	31.46	11.67	11.215	36.435	12.66	27.055	4.475	Fun	FBgn0038038	Sccpdh2
MI602	MI602-RC	chr2	chr2	+	5643975	5658252	25.415	31.46	11.67	11.215	36.435	12.66	27.055	4.475	Fun	FBgn0038038	Sccpdh2
MI603	MI603-RA	chr2	chr2	-	5644033	5646355	1.765	2.115	0.83	1.295	26.965	116.82	0.025	5.25	Fun	FBgn0038032	CG10096
MI604	MI604-RA	chr2	chr2	-	5647236	5649322	0.04	0.105	0.02	0.075	42.155	35.185	0.025	0.75	Fun	FBgn0032055	Sgp
MI605	MI605-RA	chr2	chr2	-	5650112	5656169	285.02	211.2	56.09	14.615	87.955	44.165	10.37	6.975	Fun	FBgn0038037	Cyp9f2
MI605	MI605-RB	chr2	chr2	-	5650148	5652720	285.02	211.2	56.09	14.615	87.955	44.165	10.37	6.975	Fun	FBgn0038037	Cyp9f2
MI606	MI606-RA	chr2	chr2	+	5658364	5662015	15.305	13.185	31.12	69.345	14.99	149.905	24.38	253.455	Fun	FBgn0038039	CG5196
MI606	MI606-RB	chr2	chr2	+	5658364	5662642	15.305	13.185	31.12	69.345	14.99	149.905	24.38	253.455	Fun	FBgn0038039	CG5196
MI607	MI607-RA	chr2	chr2	-	5662444	5664213	122.085	100.14	103.255	92.345	56.61	29.865	28.625	10.375	Fun	FBgn0000455	Dip-C
MI608	MI608-RA	chr2	chr2	+	5663525	5672269	1.02	1.32	3.52	7.72	5.635	7.705	8.64	4.76	Fun	FBgn0082831	pps
MI609	MI609-RA	chr2	chr2	-	5671941	5673398	1.92	1.925	10.935	6.98	4.31	3.47	0.395	1.95	Dis	FBgn0038042	Scgbeta
MI610	MI610-RA	chr2	chr2	+	5673794	5674923	10.79	12.095	32.19	32.965	49.095	9.455	70.2	5.885	Fun	FBgn0038043	CG17202
MI611	MI611-RA	chr2	chr2	-	5674878	5677073	126.885	103.83	212.005	174.37	170.15	92.955	138.935	43.655	Fun	FBgn0004103	Pp1-87B
MI611	MI611-RB	chr2	chr2	-	5674878	5677073	126.885	103.83	212.005	174.37	170.15	92.955	138.935	43.655	Fun	FBgn0004103	Pp1-87B
MI611	MI611-RC	chr2	chr2	-	5674878	5677073	126.885	103.83	212.005	174.37	170.15	92.955	138.935	43.655	Fun	FBgn0004103	Pp1-87B
MI611	MI611-RD	chr2	chr2	-	5674878	5677073	126.885	103.83	212.005	174.37	170.15	92.955	138.935	43.655	Fun	FBgn0004103	Pp1-87B
MI611	MI611-RE	chr2	chr2	-	5674878	5677073	126.885	103.83	212.005	174.37	170.15	92.955	138.935	43.655	Fun	FBgn0004103	Pp1-87B
MI612	MI612-RA	chr2	chr2	+	5677060	5682547	27.675	23.64	36.51	47.24	27.495	40.245	70.96	75.1	Fun	FBgn0086134	Prosalpha2
MI613	MI613-RA	chr2	chr2	-	5679243	5681066	19.46	22.555	78.22	94.84	35.765	36.68	48.28	32.155	Fun	FBgn0038046	CG5641
MI614	MI614-RA	chr2	chr2	-	5682424	5683812	15.47	18.55	53.97	72.89	38.5	37.13	144.495	53.99	Fun	FBgn0029512	Aos1
MI615	MI615-RA	chr2	chr2	+	5683302	5688448	128.87	231.255	19.665	54.37	713.27	249.605	118.22	212.81	Fun	FBgn0043043	Desat2
MI615	MI615-RB	chr2	chr2	+	5683420	5685349	128.87	231.255	19.665	54.37	713.27	249.605	118.22	212.81	Fun	FBgn0043043	Desat2
MI615	MI615-RC	chr2	chr2	+	5683749	5688471	128.87	231.255	19.665	54.37	713.27	249.605	118.22	212.81	Fun	FBgn0043043	Desat2
MI615	MI615-RD	chr2	chr2	+	5683792	5688448	128.87	231.255	19.665	54.37	713.27	249.605	118.22	212.81	Fun	FBgn0043043	Desat2
MI615	MI615-RE	chr2	chr2	+	5686530	5688471	128.87	231.255	19.665	54.37	713.27	249.605	118.22	212.81	Fun	FBgn0043043	Desat2
MI616	MI616-RA	chr2	chr2	+	5690436	5692640	0.09	0.16	0	19.625	0.205	83.475	0	146.365	Dis	FBgn0035218	CG9173
MI617	MI617-RA	chr2	chr2	+	5692746	5699499	900.66	1019.24	70.46	63.49	674.745	243.295	237.585	32.505	Fun	FBgn0086687	Desat1
MI617	MI617-RB	chr2	chr2	+	5694308	5699486	900.66	1019.24	70.46	63.49	674.745	243.295	237.585	32.505	Fun	FBgn0086687	Desat1
MI617	MI617-RC	chr2	chr2	+	5694308	5699506	900.66	1019.24	70.46	63.49	674.745	243.295	237.585	32.505	Fun	FBgn0086687	Desat1
MI618	MI618-RA	chr2	chr2	+	5700484	5706100	11.705	6.015	33.81	27.755	21.915	16.43	32.07	10.33	Fun	FBgn0038053	CG18549
MI619	MI619-RA	chr2	chr2	-	5706009	5709571	5.52	16.635	10.98	352.3	11.8	381.4	48.74	544.225	Fun	FBgn0025637	SkpA
MI619	MI619-RB	chr2	chr2	-	5706093	5707240	5.52	16.635	10.98	352.3	11.8	381.4	48.74	544.225	Fun	FBgn0025637	SkpA
MI619	MI619-RC	chr2	chr2	-	5706093	5709571	5.52	16.635	10.98	352.3	11.8	381.4	48.74	544.225	Fun	FBgn0025637	SkpA
MI619	MI619-RD	chr2	chr2	-	5706093	5711644	5.52	16.635	10.98	352.3	11.8	381.4	48.74	544.225	Fun	FBgn0025637	SkpA
MI619	MI619-RE	chr2	chr2	-	5706093	5714367	5.52	16.635	10.98	352.3	11.8	381.4	48.74	544.225	Fun	FBgn0025637	SkpA
MI619	MI619-RF	chr2	chr2	-	5706093	5714367	5.52	16.635	10.98	352.3	11.8	381.4	48.74	544.225	Fun	FBgn0025637	SkpA
MI619	MI619-RG	chr2	chr2	-	5706093	5714767	5.52	16.635	10.98	352.3	11.8	381.4	48.74	544.225	Fun	FBgn0025637	SkpA
MI619	MI619-RH	chr2	chr2	-	5706093	5717433	5.52	16.635	10.98	352.3	11.8	381.4	48.74	544.225	Fun	FBgn0025637	SkpA
MI619	MI619-RI	chr2	chr2	-	5706093	5717433	5.52	16.635	10.98	352.3	11.8	381.4	48.74	544.225	Fun	FBgn0025637	SkpA
MI619	MI619-RJ	chr2	chr2	-	5706093	5717433	5.52	16.635	10.98	352.3	11.8	381.4	48.74	544.225	Fun	FBgn0025637	SkpA
MI619	MI619-RK	chr2	chr2	-	5706093	5720877	5.52	16.635	10.98	352.3	11.8	381.4	48.74	544.225	Fun	FBgn0025637	SkpA
MI619	MI619-RL	chr2	chr2	-	5706093	5723528	5.52	16.635	10.98	352.3	11.8	381.4	48.74	544.225	Fun	FBgn0025637	SkpA
MI619	MI619-RM	chr2	chr2	-	5706093	5723928	5.52	16.635	10.98	352.3	11.8	381.4	48.74	544.225	Fun	FBgn0025637	SkpA
MI619	MI619-RN	chr2	chr2	-	5706105	5711921	5.52	16.635	10.98	352.3	11.8	381.4	48.74	544.225	Fun	FBgn0025637	SkpA
MI619	MI619-RO	chr2	chr2	-	5706105	5714767	5.52	16.635	10.98	352.3	11.8	381.4	48.74	544.225	Fun	FBgn0025637	SkpA
MI619	MI619-RP	chr2	chr2	-	5706105	5714767	5.52	16.635	10.98	352.3	11.8	381.4	48.74	544.225	Fun	FBgn0025637	SkpA
MI619	MI619-RQ	chr2	chr2	-	5706105	5723928	5.52	16.635	10.98	352.3	11.8	381.4	48.74	544.225	Fun	FBgn0025637	SkpA
MI619	MI619-RR	chr2	chr2	-	5708350	5710431	5.52	16.635	10.98	352.3	11.8	381.4	48.74	544.225	Fun	FBgn0025637	SkpA
MI619	MI619-RS	chr2	chr2	-	5708350	5711644	5.52	16.635	10.98	352.3	11.8	381.4	48.74	544.225	Fun	FBgn0025637	SkpA
MI619	MI619-RT	chr2	chr2	-	5708350	5717433	5.52	16.635	10.98	352.3	11.8	381.4	48.74	544.225	Fun	FBgn0025637	SkpA
MI619	MI619-RU	chr2	chr2	-	5708350	5717433	5.52	16.635	10.98	352.3	11.8	381.4	48.74	544.225	Fun	FBgn0025637	SkpA
MI619	MI619-RV	chr2	chr2	-	5708350	5717482	5.52	16.635	10.98	352.3	11.8	381.4	48.74	544.225	Fun	FBgn0025637	SkpA
MI619	MI619-RW	chr2	chr2	-	5710562	5714367	5.52	16.635	10.98	352.3	11.8	381.4	48.74	544.225	Fun	FBgn0025637	SkpA
MI619	MI619-RX	chr2	chr2	-	5710664	5717482	5.52	16.635	10.98	352.3	11.8	381.4	48.74	544.225	Fun	FBgn0025637	SkpA
MI619	MI619-RY	chr2	chr2	-	5710664	5723528	5.52	16.635	10.98	352.3	11.8	381.4	48.74	544.225	Fun	FBgn0025637	SkpA
MI619	MI619-RZ	chr2	chr2	-	5710664	5723928	5.52	16.635	10.98	352.3	11.8	381.4	48.74	544.225	Fun	FBgn0025637	SkpA
MI620	MI620-RA	chr2	chr2	+	5711742	5719482	7.44	9.39	31.615	40.955	42.63	27.48	102.515	16.67	Fun	FBgn0038055	trus
MI620	MI620-RB	chr2	chr2	+	5711752	5716420	7.44	9.39	31.615	40.955	42.63	27.48	102.515	16.67	Fun	FBgn0038055	trus
MI619	MI619-RAA	chr2	chr2	-	5713157	5717482	5.52	16.635	10.98	352.3	11.8	381.4	48.74	544.225	Fun	FBgn0025637	SkpA
MI619	MI619-RAB	chr2	chr2	-	5713157	5723928	5.52	16.635	10.98	352.3	11.8	381.4	48.74	544.225	Fun	FBgn0025637	SkpA
MI619	MI619-RAC	chr2	chr2	-	5713337	5717433	5.52	16.635	10.98	352.3	11.8	381.4	48.74	544.225	Fun	FBgn0025637	SkpA
MI619	MI619-RAD	chr2	chr2	-	5713337	5720877	5.52	16.635	10.98	352.3	11.8	381.4	48.74	544.225	Fun	FBgn0025637	SkpA
MI619	MI619-RAE	chr2	chr2	-	5713337	5723528	5.52	16.635	10.98	352.3	11.8	381.4	48.74	544.225	Fun	FBgn0025637	SkpA
MI619	MI619-RAF	chr2	chr2	-	5713378	5723928	5.52	16.635	10.98	352.3	11.8	381.4	48.74	544.225	Fun	FBgn0025637	SkpA
MI620	MI620-RC	chr2	chr2	+	5714291	5725479	7.44	9.39	31.615	40.955	42.63	27.48	102.515	16.67	Fun	FBgn0038055	trus
MI620	MI620-RD	chr2	chr2	+	5714291	5725480	7.44	9.39	31.615	40.955	42.63	27.48	102.515	16.67	Fun	FBgn0038055	trus
MI620	MI620-RE	chr2	chr2	+	5714358	5719488	7.44	9.39	31.615	40.955	42.63	27.48	102.515	16.67	Fun	FBgn0038055	trus
MI620	MI620-RF	chr2	chr2	+	5714358	5722389	7.44	9.39	31.615	40.955	42.63	27.48	102.515	16.67	Fun	FBgn0038055	trus
MI620	MI620-RG	chr2	chr2	+	5714358	5722537	7.44	9.39	31.615	40.955	42.63	27.48	102.515	16.67	Fun	FBgn0038055	trus
MI620	MI620-RH	chr2	chr2	+	5714412	5719487	7.44	9.39	31.615	40.955	42.63	27.48	102.515	16.67	Fun	FBgn0038055	trus
MI620	MI620-RI	chr2	chr2	+	5717357	5724930	7.44	9.39	31.615	40.955	42.63	27.48	102.515	16.67	Fun	FBgn0038055	trus
MI620	MI620-RJ	chr2	chr2	+	5717357	5725480	7.44	9.39	31.615	40.955	42.63	27.48	102.515	16.67	Fun	FBgn0038055	trus
MI620	MI620-RK	chr2	chr2	+	5717478	5724928	7.44	9.39	31.615	40.955	42.63	27.48	102.515	16.67	Fun	FBgn0038055	trus
MI620	MI620-RL	chr2	chr2	+	5717483	5725475	7.44	9.39	31.615	40.955	42.63	27.48	102.515	16.67	Fun	FBgn0038055	trus
MI620	MI620-RM	chr2	chr2	+	5720401	5725475	7.44	9.39	31.615	40.955	42.63	27.48	102.515	16.67	Fun	FBgn0038055	trus
MI620	MI620-RN	chr2	chr2	+	5720401	5725481	7.44	9.39	31.615	40.955	42.63	27.48	102.515	16.67	Fun	FBgn0038055	trus
MI620	MI620-RO	chr2	chr2	+	5723556	5725481	7.44	9.39	31.615	40.955	42.63	27.48	102.515	16.67	Fun	FBgn0038055	trus
MI621	MI621-RA	chr2	chr2	-	5725504	5727534	16.225	12.41	19.69	20.325	37.7	12.2	63.425	7.92	Fun	FBgn0038056	CG5961
MI622	MI622-RA	chr2	chr2	+	5727300	5729643	8.345	8.865	15.36	12.335	27.34	7.75	26.88	3.075	Fun	FBgn0038057	CG12267
MI623	MI623-RA	chr2	chr2	-	5729344	5732300	3.555	3.11	8.02	8.18	5.745	5.37	11.06	3.315	Fun	FBgn0038058	CG5608
MI624	MI624-RA	chr2	chr2	-	5732794	5740306	34.215	32.99	18.045	528.76	4.275	2.475	26.05	6.06	Fun	FBgn0013279	Hsp70Bc
MI624	MI624-RB	chr2	chr2	-	5732815	5735446	34.215	32.99	18.045	528.76	4.275	2.475	26.05	6.06	Fun	FBgn0013279	Hsp70Bc
MI625	MI625-RA	chr2	chr2	+	5732891	5746915	38.62	43.87	27.345	700.205	2.565	2.385	17.555	6.055	Fun	FBgn0013279	Hsp70Bc
MI625	MI625-RB	chr2	chr2	+	5732891	5753691	38.62	43.87	27.345	700.205	2.565	2.385	17.555	6.055	Fun	FBgn0013279	Hsp70Bc
MI625	MI625-RC	chr2	chr2	+	5737701	5753623	38.62	43.87	27.345	700.205	2.565	2.385	17.555	6.055	Fun	FBgn0013279	Hsp70Bc
MI625	MI625-RD	chr2	chr2	+	5737701	5753691	38.62	43.87	27.345	700.205	2.565	2.385	17.555	6.055	Fun	FBgn0013279	Hsp70Bc
MI625	MI625-RE	chr2	chr2	+	5737751	5753691	38.62	43.87	27.345	700.205	2.565	2.385	17.555	6.055	Fun	FBgn0013279	Hsp70Bc
MI625	MI625-RF	chr2	chr2	+	5737751	5753691	38.62	43.87	27.345	700.205	2.565	2.385	17.555	6.055	Fun	FBgn0013279	Hsp70Bc
MI625	MI625-RG	chr2	chr2	+	5737751	5753691	38.62	43.87	27.345	700.205	2.565	2.385	17.555	6.055	Fun	FBgn0013279	Hsp70Bc
MI625	MI625-RH	chr2	chr2	+	5737751	5753691	38.62	43.87	27.345	700.205	2.565	2.385	17.555	6.055	Fun	FBgn0013279	Hsp70Bc
MI625	MI625-RI	chr2	chr2	+	5737765	5753691	38.62	43.87	27.345	700.205	2.565	2.385	17.555	6.055	Fun	FBgn0013279	Hsp70Bc
MI625	MI625-RJ	chr2	chr2	+	5744502	5753691	38.62	43.87	27.345	700.205	2.565	2.385	17.555	6.055	Fun	FBgn0013279	Hsp70Bc
MI626	MI626-RA	chr2	chr2	-	5744529	5757210	3.765	4.225	8.02	8.885	14.065	6.845	21.89	3.45	Dis	FBgn0278604	dmt
MI626	MI626-RB	chr2	chr2	-	5753439	5756992	3.765	4.225	8.02	8.885	14.065	6.845	21.89	3.45	Dis	FBgn0278604	dmt
MI627	MI627-RA	chr2	chr2	+	5757014	5761944	2.615	2.885	6.025	22.33	21.6	57.24	25.875	61.475	Fun	FBgn0037734	trbd
MI628	MI628-RA	chr2	chr2	+	5762995	5773175	21.53	25.18	20.635	23.59	32.63	56.795	5.24	51.745	Fun	FBgn0051352	Unc-115a
MI628	MI628-RB	chr2	chr2	+	5762995	5773176	21.53	25.18	20.635	23.59	32.63	56.795	5.24	51.745	Fun	FBgn0051352	Unc-115a
MI628	MI628-RC	chr2	chr2	+	5767961	5773176	21.53	25.18	20.635	23.59	32.63	56.795	5.24	51.745	Fun	FBgn0051352	Unc-115a
MI629	MI629-RA	chr2	chr2	-	5773075	5774393	3.62	2.965	11.155	13.67	11.67	8.97	23.54	8.65	Fun	FBgn0052939	CG32939
MI630	MI630-RA	chr2	chr2	+	5774419	5778210	4.23	4.79	19.52	19.355	6.575	5.1	10.245	2.815	Fun	FBgn0038870	Oga
MI631	MI631-RA	chr2	chr2	-	5777945	5779250	3.66	3.39	6.17	15.47	10.725	14.3	13.27	17.415	Fun	FBgn0038871	CG3337
MI632	MI632-RA	chr2	chr2	+	5779066	5785155	2.095	2.34	6.905	7.465	7.88	5.93	17.38	4.68	Fun	FBgn0038872	Nelf-A
MI633	MI633-RA	chr2	chr2	-	5785847	5794501	0.13	0.23	0.555	0.655	8.845	2.865	0	0.625	Fun	FBgn0000527	e
MI634	MI634-RA	chr2	chr2	+	5798435	5801296	9.355	4.15	0	0.045	14.805	8.765	0	0.165	Fun	FBgn0038873	CG5892
MI635	MI635-RA	chr2	chr2	+	5803090	5818065	1.8	2.55	0.485	0.52	0.35	0.305	0	0.085	Fun	FBgn0038874	ETHR
MI636	MI636-RA	chr2	chr2	-	5819730	5822909	101.94	79.325	118.94	106.295	121.415	111.78	248.11	153.565	Fun	FBgn0285937	Rab1
MI637	MI637-RA	chr2	chr2	-	5822993	5823924	29.085	24.71	63.45	54.005	47.275	33.25	864.77	293.155	Fun	FBgn0043012	AP-2sigma
MI638	MI638-RA	chr2	chr2	+	5823938	5825418	8.145	9.055	11.06	16.465	15.37	15.935	16.76	10.55	Fun	FBgn0038876	Idi
MI639	MI639-RA	chr2	chr2	-	5824929	5827449	32.91	28.44	32.29	25.49	72.725	47.05	78.535	19.945	Fun	FBgn0038877	CG3308
MI640	MI640-RA	chr2	chr2	-	5827652	5828773	12.645	13.24	18.43	14.795	30.555	8.54	55.005	4.185	Fun	FBgn0038878	CG3301
MI641	MI641-RA	chr2	chr2	-	5830796	5834544	0.095	0.1	0.06	0.14	0.31	0.285	0	0.03	Sil	FBgn0038880	SIFaR
MI642	MI642-RA	chr2	chr2	+	5837245	5837863	0	0	0	0.115	0.44	0.36	0	0.13	Sil	FBgn0038879	CG17298
MI643	MI643-RA	chr2	chr2	-	5839268	5856264	0	0.02	0	0.01	0.06	0.09	0	0.055	Sil	FBgn0038880	SIFaR
MI644	MI644-RA	chr2	chr2	-	5899736	5931454	3.45	3.045	22.48	14.315	7.18	6.855	2.055	3.18	Fun	FBgn0038881	CG16791
MI644	MI644-RB	chr2	chr2	-	5899736	5931477	3.45	3.045	22.48	14.315	7.18	6.855	2.055	3.18	Fun	FBgn0038881	CG16791
MI645	MI645-RA	chr2	chr2	-	5932562	5958965	26.54	24.795	109.845	118.29	69.265	44.9	159.19	33.31	Fun	FBgn0002781	mod(mdg4)
MI645	MI645-RB	chr2	chr2	-	5932562	5958965	26.54	24.795	109.845	118.29	69.265	44.9	159.19	33.31	Fun	FBgn0002781	mod(mdg4)
MI645	MI645-RC	chr2	chr2	-	5932562	5958965	26.54	24.795	109.845	118.29	69.265	44.9	159.19	33.31	Fun	FBgn0002781	mod(mdg4)
MI645	MI645-RD	chr2	chr2	-	5932604	5958954	26.54	24.795	109.845	118.29	69.265	44.9	159.19	33.31	Fun	FBgn0002781	mod(mdg4)
MI645	MI645-RE	chr2	chr2	-	5932604	5958954	26.54	24.795	109.845	118.29	69.265	44.9	159.19	33.31	Fun	FBgn0002781	mod(mdg4)
MI645	MI645-RF	chr2	chr2	-	5932604	5958954	26.54	24.795	109.845	118.29	69.265	44.9	159.19	33.31	Fun	FBgn0002781	mod(mdg4)
MI645	MI645-RG	chr2	chr2	-	5932604	5958963	26.54	24.795	109.845	118.29	69.265	44.9	159.19	33.31	Fun	FBgn0002781	mod(mdg4)
MI645	MI645-RH	chr2	chr2	-	5932604	5958965	26.54	24.795	109.845	118.29	69.265	44.9	159.19	33.31	Fun	FBgn0002781	mod(mdg4)
MI645	MI645-RI	chr2	chr2	-	5932718	5958960	26.54	24.795	109.845	118.29	69.265	44.9	159.19	33.31	Fun	FBgn0002781	mod(mdg4)
MI645	MI645-RJ	chr2	chr2	-	5932718	5958963	26.54	24.795	109.845	118.29	69.265	44.9	159.19	33.31	Fun	FBgn0002781	mod(mdg4)
MI645	MI645-RK	chr2	chr2	-	5932718	5958963	26.54	24.795	109.845	118.29	69.265	44.9	159.19	33.31	Fun	FBgn0002781	mod(mdg4)
MI645	MI645-RL	chr2	chr2	-	5932718	5958963	26.54	24.795	109.845	118.29	69.265	44.9	159.19	33.31	Fun	FBgn0002781	mod(mdg4)
MI645	MI645-RM	chr2	chr2	-	5932718	5958965	26.54	24.795	109.845	118.29	69.265	44.9	159.19	33.31	Fun	FBgn0002781	mod(mdg4)
MI645	MI645-RN	chr2	chr2	-	5933518	5958965	26.54	24.795	109.845	118.29	69.265	44.9	159.19	33.31	Fun	FBgn0002781	mod(mdg4)
MI645	MI645-RO	chr2	chr2	-	5933877	5958954	26.54	24.795	109.845	118.29	69.265	44.9	159.19	33.31	Fun	FBgn0002781	mod(mdg4)
MI645	MI645-RP	chr2	chr2	-	5938589	5958965	26.54	24.795	109.845	118.29	69.265	44.9	159.19	33.31	Fun	FBgn0002781	mod(mdg4)
MI645	MI645-RQ	chr2	chr2	-	5938603	5958965	26.54	24.795	109.845	118.29	69.265	44.9	159.19	33.31	Fun	FBgn0002781	mod(mdg4)
MI645	MI645-RR	chr2	chr2	-	5938973	5941173	26.54	24.795	109.845	118.29	69.265	44.9	159.19	33.31	Fun	FBgn0002781	mod(mdg4)
MI645	MI645-RS	chr2	chr2	-	5938973	5941173	26.54	24.795	109.845	118.29	69.265	44.9	159.19	33.31	Fun	FBgn0002781	mod(mdg4)
MI645	MI645-RT	chr2	chr2	-	5938973	5941173	26.54	24.795	109.845	118.29	69.265	44.9	159.19	33.31	Fun	FBgn0002781	mod(mdg4)
MI646	MI646-RA	chr2	chr2	+	5941849	5945298	9.235	7.44	37.38	26.395	22.72	15.425	43.025	5.505	Fun	FBgn0261837	pre-mod(mdg4)-T
MI646	MI646-RB	chr2	chr2	+	5942318	5944189	9.235	7.44	37.38	26.395	22.72	15.425	43.025	5.505	Fun	FBgn0261837	pre-mod(mdg4)-T
MI645	MI645-RU	chr2	chr2	-	5945040	5947978	26.54	24.795	109.845	118.29	69.265	44.9	159.19	33.31	Fun	FBgn0002781	mod(mdg4)
MI645	MI645-RV	chr2	chr2	-	5945040	5958954	26.54	24.795	109.845	118.29	69.265	44.9	159.19	33.31	Fun	FBgn0002781	mod(mdg4)
MI645	MI645-RW	chr2	chr2	-	5945067	5958965	26.54	24.795	109.845	118.29	69.265	44.9	159.19	33.31	Fun	FBgn0002781	mod(mdg4)
MI645	MI645-RX	chr2	chr2	-	5945779	5958965	26.54	24.795	109.845	118.29	69.265	44.9	159.19	33.31	Fun	FBgn0002781	mod(mdg4)
MI645	MI645-RY	chr2	chr2	-	5946652	5958965	26.54	24.795	109.845	118.29	69.265	44.9	159.19	33.31	Fun	FBgn0002781	mod(mdg4)
MI647	MI647-RA	chr2	chr2	+	5948093	5951634	1.355	1.195	7.355	5.06	3.37	2.5	7.83	3.425	Fun	FBgn0261844	pre-mod(mdg4)-V
MI645	MI645-RZ	chr2	chr2	-	5952044	5958965	26.54	24.795	109.845	118.29	69.265	44.9	159.19	33.31	Fun	FBgn0002781	mod(mdg4)
MI645	MI645-RAA	chr2	chr2	-	5952044	5958965	26.54	24.795	109.845	118.29	69.265	44.9	159.19	33.31	Fun	FBgn0002781	mod(mdg4)
MI645	MI645-RAB	chr2	chr2	-	5952047	5958960	26.54	24.795	109.845	118.29	69.265	44.9	159.19	33.31	Fun	FBgn0002781	mod(mdg4)
MI645	MI645-RAC	chr2	chr2	-	5952047	5958965	26.54	24.795	109.845	118.29	69.265	44.9	159.19	33.31	Fun	FBgn0002781	mod(mdg4)
MI645	MI645-RAD	chr2	chr2	-	5952047	5958965	26.54	24.795	109.845	118.29	69.265	44.9	159.19	33.31	Fun	FBgn0002781	mod(mdg4)
MI645	MI645-RAE	chr2	chr2	-	5952932	5958939	26.54	24.795	109.845	118.29	69.265	44.9	159.19	33.31	Fun	FBgn0002781	mod(mdg4)
MI645	MI645-RAF	chr2	chr2	-	5953919	5955251	26.54	24.795	109.845	118.29	69.265	44.9	159.19	33.31	Fun	FBgn0002781	mod(mdg4)
MI648	MI648-RA	chr2	chr2	+	5960220	5965631	0	0.02	0.11	0.16	0.015	0.035	0	0.045	Sil	FBgn0004110	tin
MI649	MI649-RA	chr2	chr2	+	5968570	5969477	0	0	0	0	0.13	0.76	0	0	Sil	FBgn0261292	CheB53a
MI650	MI650-RA	chr2	chr2	+	5973038	5973852	0.945	0.72	1.78	1.29	0.86	0.53	0	0	Dis	FBgn0004862	bap
MI651	MI651-RA	chr2	chr2	-	5984697	5986619	0	0	0	0	0	0.195	0	0.025	Sil	FBgn0261293	CheB53b
MI652	MI652-RA	chr2	chr2	+	5987092	5989094	3.4	2.325	0.025	0	0.79	0.045	0	0	Fun	FBgn0038076	Cyp313a4
MI653	MI653-RA	chr2	chr2	+	5989815	5992166	0.755	0.405	0	0	2.33	0.85	1.005	0.805	Fun	FBgn0038076	Cyp313a4
MI654	MI654-RA	chr2	chr2	+	5992573	5995448	6.07	6.25	20.935	25.765	18.325	17.46	27.105	10.715	Fun	FBgn0026207	mbo
MI655	MI655-RA	chr2	chr2	-	5995269	5996889	111.12	152.565	6.385	7.415	57.975	44.82	0.235	1.345	Fun	FBgn0038074	Gnmt
MI656	MI656-RA	chr2	chr2	-	5997235	6005319	0.03	0.01	0.505	0.135	0.015	0.025	0	0	Sil	FBgn0038073	CG14395
MI657	MI657-RA	chr2	chr2	-	6010499	6017230	2.91	4.04	0.12	0.095	11.27	9.33	0.5	3.65	Fun	FBgn0038072	CG6225
MI658	MI658-RA	chr2	chr2	-	6018819	6023961	7.99	6.26	66.395	45.395	1.385	1.005	0.265	0.97	Dis	FBgn0038071	Dtg
MI659	MI659-RA	chr2	chr2	+	6029705	6031153	0.145	0.335	0.54	1.465	0.605	0.405	0.28	0.955	Dis	FBgn0038070	CG6753
MI660	MI660-RA	chr2	chr2	-	6032838	6036295	0	0	0	0	0	134.89	0.04	5.13	Fun	FBgn0042207	CG18530
MI660	MI660-RB	chr2	chr2	-	6032838	6036295	0	0	0	0	0	134.89	0.04	5.13	Fun	FBgn0042207	CG18530
MI660	MI660-RC	chr2	chr2	-	6032838	6036295	0	0	0	0	0	134.89	0.04	5.13	Fun	FBgn0042207	CG18530
MI660	MI660-RD	chr2	chr2	-	6032838	6036295	0	0	0	0	0	134.89	0.04	5.13	Fun	FBgn0042207	CG18530
MI660	MI660-RE	chr2	chr2	-	6032838	6036295	0	0	0	0	0	134.89	0.04	5.13	Fun	FBgn0042207	CG18530
MI660	MI660-RF	chr2	chr2	-	6032838	6036295	0	0	0	0	0	134.89	0.04	5.13	Fun	FBgn0042207	CG18530
MI660	MI660-RG	chr2	chr2	-	6034867	6036295	0	0	0	0	0	134.89	0.04	5.13	Fun	FBgn0042207	CG18530
MI661	MI661-RA	chr2	chr2	+	6039034	6042552	0.935	0.62	14.515	9.01	3.385	2.9	10.66	1.22	Fun	FBgn0038815	CG5466
MI662	MI662-RA	chr2	chr2	+	6043119	6050184	2.055	2.39	10.18	11.155	7.315	7.22	21.015	4.53	Fun	FBgn0001169	H
MI662	MI662-RB	chr2	chr2	+	6043119	6050198	2.055	2.39	10.18	11.155	7.315	7.22	21.015	4.53	Fun	FBgn0001169	H
MI662	MI662-RC	chr2	chr2	+	6043139	6050198	2.055	2.39	10.18	11.155	7.315	7.22	21.015	4.53	Fun	FBgn0001169	H
MI662	MI662-RD	chr2	chr2	+	6043150	6050198	2.055	2.39	10.18	11.155	7.315	7.22	21.015	4.53	Fun	FBgn0001169	H
MI663	MI663-RA	chr2	chr2	-	6050059	6055135	4.71	5.43	11.48	17.21	21.25	7.85	23.125	3.055	Fun	FBgn0015279	Pi3K92E
MI663	MI663-RB	chr2	chr2	-	6050059	6055899	4.71	5.43	11.48	17.21	21.25	7.85	23.125	3.055	Fun	FBgn0015279	Pi3K92E
MI663	MI663-RC	chr2	chr2	-	6050059	6055914	4.71	5.43	11.48	17.21	21.25	7.85	23.125	3.055	Fun	FBgn0015279	Pi3K92E
MI663	MI663-RD	chr2	chr2	-	6050059	6055914	4.71	5.43	11.48	17.21	21.25	7.85	23.125	3.055	Fun	FBgn0015279	Pi3K92E
MI664	MI664-RA	chr2	chr2	+	6057782	6067431	2.095	2.06	7.67	6.64	3.78	2.41	1.915	0.805	Fun	FBgn0038816	Lrrk
MI664	MI664-RB	chr2	chr2	+	6057803	6066836	2.095	2.06	7.67	6.64	3.78	2.41	1.915	0.805	Fun	FBgn0038816	Lrrk
MI664	MI664-RC	chr2	chr2	+	6058136	6066836	2.095	2.06	7.67	6.64	3.78	2.41	1.915	0.805	Fun	FBgn0038816	Lrrk
MI664	MI664-RD	chr2	chr2	+	6058530	6066836	2.095	2.06	7.67	6.64	3.78	2.41	1.915	0.805	Fun	FBgn0038816	Lrrk
MI665	MI665-RA	chr2	chr2	-	6066838	6074340	0.995	1.615	0.37	0.335	1.045	0.815	0.265	0.47	Fun	FBgn0028422	GluRIID
MI666	MI666-RA	chr2	chr2	-	6074444	6081836	1.595	1.575	7.51	22.15	3.985	31.195	0.09	38.685	Fun	FBgn0038818	Nep4
MI666	MI666-RB	chr2	chr2	-	6074444	6081839	1.595	1.575	7.51	22.15	3.985	31.195	0.09	38.685	Fun	FBgn0038818	Nep4
MI667	MI667-RA	chr2	chr2	+	6091381	6094300	7.085	12.68	10.975	3.97	366.125	226.72	2.605	2.72	Fun	FBgn0038819	Cpr92F
MI668	MI668-RA	chr2	chr2	-	6098405	6099620	0	0	4.095	1.545	965.4	497.76	0	0	Fun	FBgn0038820	CG4000
MI669	MI669-RA	chr2	chr2	-	6110087	6111897	0.115	0.13	1.455	0.925	1.44	0.915	1.955	0.29	Dis	FBgn0024944	Oamb
MI670	MI670-RA	chr2	chr2	-	6112859	6114973	0.165	0.16	0.13	0.08	1.17	1.205	3.34	0.12	Fun	FBgn0024944	Oamb
MI671	MI671-RA	chr2	chr2	+	6155891	6156955	0	0	0.175	1.415	17.3	16.575	0	0	Fun	FBgn0051205	CG31205
MI672	MI672-RA	chr2	chr2	+	6157604	6161310	0.15	0.065	20.895	14.12	0.25	2.68	0.12	3.48	Fun	FBgn0033232	CG12159
MI672	MI672-RB	chr2	chr2	+	6157604	6161310	0.15	0.065	20.895	14.12	0.25	2.68	0.12	3.48	Fun	FBgn0033232	CG12159
MI672	MI672-RC	chr2	chr2	+	6157604	6161310	0.15	0.065	20.895	14.12	0.25	2.68	0.12	3.48	Fun	FBgn0033232	CG12159
MI672	MI672-RD	chr2	chr2	+	6157604	6161310	0.15	0.065	20.895	14.12	0.25	2.68	0.12	3.48	Fun	FBgn0033232	CG12159
MI672	MI672-RE	chr2	chr2	+	6157626	6161281	0.15	0.065	20.895	14.12	0.25	2.68	0.12	3.48	Fun	FBgn0033232	CG12159
MI673	MI673-RA	chr2	chr2	+	6163541	6163775	0	0	0	0	0	0	0	1.545	Dis	FBgn0028692	Rpn2
MI674	MI674-RA	chr2	chr2	-	6163640	6166197	0.35	0.375	1.44	3.05	6.205	2.75	10.2	2.485	NA
MI674	MI674-RB	chr2	chr2	-	6165393	6166195	0.35	0.375	1.44	3.05	6.205	2.75	10.2	2.485	NA
MI675	MI675-RA	chr2	chr2	-	6167307	6169685	0.425	0.27	0.59	1.095	2.295	1.61	2.385	0.96	Dis	FBgn0000119	arr
MI676	MI676-RA	chr2	chr2	+	6169690	6171606	8.09	7.425	32.475	35.22	20.24	7.05	65.265	5.99	Fun	FBgn0004107	Cdk2
MI676	MI676-RB	chr2	chr2	+	6169690	6171959	8.09	7.425	32.475	35.22	20.24	7.05	65.265	5.99	Fun	FBgn0004107	Cdk2
MI677	MI677-RA	chr2	chr2	-	6171489	6172829	3.295	3.56	0.065	0.06	0.175	0.22	0.045	0	Fun	FBgn0038821	CG17267
MI678	MI678-RA	chr2	chr2	+	6174448	6180430	0.3	0.11	0.665	0.49	3.98	2.64	2.46	0.42	Dis	FBgn0259222	CG42322
MI679	MI679-RA	chr2	chr2	-	6176633	6177647	0	0	3.32	2.955	56.045	44.2	1.205	0.24	Fun	FBgn0051199	CG31199
MI680	MI680-RA	chr2	chr2	-	6177864	6195098	5.65	5.495	25.15	17.475	13.135	8.335	11.7	3.58	Fun	FBgn0051195	CG31195
MI681	MI681-RA	chr2	chr2	+	6180506	6189022	0.35	0.31	1.8	1.15	3.925	3.675	0.66	0.155	Dis	FBgn0259222	CG42322
MI682	MI682-RA	chr2	chr2	+	6189110	6238643	38.12	45.615	330.99	282.22	61.695	607.6	10.045	600.585	Fun	FBgn0038826	Syp
MI683	MI683-RA	chr2	chr2	-	6202552	6205402	0.76	0.765	3.055	1.96	0.69	0.49	0	0	Fun	FBgn0046689	Takl1
MI682	MI682-RB	chr2	chr2	+	6211677	6235398	38.12	45.615	330.99	282.22	61.695	607.6	10.045	600.585	Fun	FBgn0038826	Syp
MI682	MI682-RC	chr2	chr2	+	6211677	6244442	38.12	45.615	330.99	282.22	61.695	607.6	10.045	600.585	Fun	FBgn0038826	Syp
MI682	MI682-RD	chr2	chr2	+	6211709	6244447	38.12	45.615	330.99	282.22	61.695	607.6	10.045	600.585	Fun	FBgn0038826	Syp
MI682	MI682-RE	chr2	chr2	+	6216382	6238643	38.12	45.615	330.99	282.22	61.695	607.6	10.045	600.585	Fun	FBgn0038826	Syp
MI682	MI682-RF	chr2	chr2	+	6216383	6244447	38.12	45.615	330.99	282.22	61.695	607.6	10.045	600.585	Fun	FBgn0038826	Syp
MI682	MI682-RG	chr2	chr2	+	6222279	6235387	38.12	45.615	330.99	282.22	61.695	607.6	10.045	600.585	Fun	FBgn0038826	Syp
MI682	MI682-RH	chr2	chr2	+	6222279	6238643	38.12	45.615	330.99	282.22	61.695	607.6	10.045	600.585	Fun	FBgn0038826	Syp
MI684	MI684-RA	chr2	chr2	-	6244503	6250061	1.24	1.225	3.13	6	3.28	3.63	6.185	2.755	Fun	FBgn0038827	Fancd2
MI685	MI685-RA	chr2	chr2	-	6250162	6252433	1.615	1.255	16.08	10.49	6.95	3.13	13.495	1.845	Fun	FBgn0038828	CG17270
MI686	MI686-RA	chr2	chr2	-	6252504	6255469	79.4	88.3	44.135	50.29	49.115	87.415	45.49	66.73	Fun	FBgn0038829	CG17271
MI686	MI686-RB	chr2	chr2	-	6252780	6255469	79.4	88.3	44.135	50.29	49.115	87.415	45.49	66.73	Fun	FBgn0038829	CG17271
MI686	MI686-RC	chr2	chr2	-	6252840	6255466	79.4	88.3	44.135	50.29	49.115	87.415	45.49	66.73	Fun	FBgn0038829	CG17271
MI686	MI686-RD	chr2	chr2	-	6252851	6255466	79.4	88.3	44.135	50.29	49.115	87.415	45.49	66.73	Fun	FBgn0038829	CG17271
MI686	MI686-RE	chr2	chr2	-	6252851	6255466	79.4	88.3	44.135	50.29	49.115	87.415	45.49	66.73	Fun	FBgn0038829	CG17271
MI686	MI686-RF	chr2	chr2	-	6252853	6255441	79.4	88.3	44.135	50.29	49.115	87.415	45.49	66.73	Fun	FBgn0038829	CG17271
MI686	MI686-RG	chr2	chr2	-	6252853	6255441	79.4	88.3	44.135	50.29	49.115	87.415	45.49	66.73	Fun	FBgn0038829	CG17271
MI687	MI687-RA	chr2	chr2	+	6256122	6263356	18.54	25.37	10.72	15.495	28.37	12.165	16.37	19.22	Fun	FBgn0039045	CG17119
MI687	MI687-RB	chr2	chr2	+	6259828	6263356	18.54	25.37	10.72	15.495	28.37	12.165	16.37	19.22	Fun	FBgn0039045	CG17119
MI688	MI688-RA	chr2	chr2	+	6264868	6274342	4.38	3.84	13.2	14.745	20.66	12.375	48.575	12.465	Fun	FBgn0039043	CG17121
MI688	MI688-RB	chr2	chr2	+	6264918	6268578	4.38	3.84	13.2	14.745	20.66	12.375	48.575	12.465	Fun	FBgn0039043	CG17121
MI689	MI689-RA	chr2	chr2	-	6273967	6275124	3.29	2.505	0.04	0	0.77	0.04	0	0	Fun	FBgn0039042	CG13837
MI690	MI690-RA	chr2	chr2	-	6276510	6277083	0	0	0	12.035	0	97.9	0.2	996.25	Fun	FBgn0039041	CG13838
MI691	MI691-RA	chr2	chr2	+	6283544	6285061	5.025	3.26	0.57	0.595	13.585	24.305	0.155	1.62	Fun	FBgn0039040	CG13833
MI692	MI692-RA	chr2	chr2	+	6292814	6297892	0.145	0.18	3.635	1.785	0.23	0.095	0.035	0.02	Fun	FBgn0039039	lmd
MI693	MI693-RA	chr2	chr2	-	6304544	6307008	0.94	0.56	0.07	0.22	1.55	2.075	0	2.21	Fun	FBgn0039038	CG6688
MI694	MI694-RA	chr2	chr2	+	6308855	6322390	0.92	0.715	1.785	0.955	4.57	0.9	3.78	0.74	Fun	FBgn0085404	CG34375
MI695	MI695-RA	chr2	chr2	+	6324799	6344242	4.645	4.845	1.44	1.69	7.565	2.525	1.115	0.88	Fun	FBgn0263390	Nha2
MI695	MI695-RB	chr2	chr2	+	6330864	6344242	4.645	4.845	1.44	1.69	7.565	2.525	1.115	0.88	Fun	FBgn0263390	Nha2
MI696	MI696-RA	chr2	chr2	-	6367942	6417508	0.415	0.48	10.05	5.53	1.81	2.08	0.06	0.365	Fun	FBgn0017590	klg
MI697	MI697-RA	chr2	chr2	-	6393678	6394797	16.215	19.19	37.2	38.965	25.61	17.495	0	0.69	Fun	FBgn0039030	CG6660
MI698	MI698-RA	chr2	chr2	+	6469391	6471492	0	0	0	7.805	0	19.64	0	27.97	Fun	FBgn0039029	CG4704
MI699	MI699-RA	chr2	chr2	-	6477646	6489793	0	0	0	0	0	0	0.015	0.015	Sil
MI700	MI700-RA	chr2	chr2	+	6491104	6495080	0.035	0.375	0.17	18.31	0.385	15.1	1	12.215	Fun	FBgn0036892	Lon
MI700	MI700-RB	chr2	chr2	+	6491104	6495080	0.035	0.375	0.17	18.31	0.385	15.1	1	12.215	Fun	FBgn0036892	Lon
MI700	MI700-RC	chr2	chr2	+	6491104	6495311	0.035	0.375	0.17	18.31	0.385	15.1	1	12.215	Fun	FBgn0036892	Lon
MI701	MI701-RA	chr2	chr2	+	6512824	6514269	0.025	0	0.06	0	0	0	0.035	0	Sil	FBgn0039028	CG13840
MI702	MI702-RA	chr2	chr2	-	6527680	6529506	0.105	0.265	4.365	3.78	0	0.095	0	0.025	Fun	FBgn0039027	CG7031
MI703	MI703-RA	chr2	chr2	+	6545398	6546259	0	0	0	3.77	0.055	65.48	0	203.83	Fun
MI704	MI704-RA	chr2	chr2	-	6547355	6560291	17.585	14.45	32.185	34.46	41.77	39.955	33.545	20.53	Fun	FBgn0039026	CG7029
MI704	MI704-RB	chr2	chr2	-	6547355	6589294	17.585	14.45	32.185	34.46	41.77	39.955	33.545	20.53	Fun	FBgn0039026	CG7029
MI704	MI704-RC	chr2	chr2	-	6547355	6592567	17.585	14.45	32.185	34.46	41.77	39.955	33.545	20.53	Fun	FBgn0039026	CG7029
MI704	MI704-RD	chr2	chr2	-	6547362	6560398	17.585	14.45	32.185	34.46	41.77	39.955	33.545	20.53	Fun	FBgn0039026	CG7029
MI704	MI704-RE	chr2	chr2	-	6547362	6560398	17.585	14.45	32.185	34.46	41.77	39.955	33.545	20.53	Fun	FBgn0039026	CG7029
MI704	MI704-RF	chr2	chr2	-	6547362	6592555	17.585	14.45	32.185	34.46	41.77	39.955	33.545	20.53	Fun	FBgn0039026	CG7029
MI704	MI704-RG	chr2	chr2	-	6547364	6560189	17.585	14.45	32.185	34.46	41.77	39.955	33.545	20.53	Fun	FBgn0039026	CG7029
MI704	MI704-RH	chr2	chr2	-	6566712	6592555	17.585	14.45	32.185	34.46	41.77	39.955	33.545	20.53	Fun	FBgn0039026	CG7029
MI704	MI704-RI	chr2	chr2	-	6566712	6592567	17.585	14.45	32.185	34.46	41.77	39.955	33.545	20.53	Fun	FBgn0039026	CG7029
MI704	MI704-RJ	chr2	chr2	-	6566715	6589358	17.585	14.45	32.185	34.46	41.77	39.955	33.545	20.53	Fun	FBgn0039026	CG7029
MI704	MI704-RK	chr2	chr2	-	6566736	6589294	17.585	14.45	32.185	34.46	41.77	39.955	33.545	20.53	Fun	FBgn0039026	CG7029
MI705	MI705-RA	chr2	chr2	+	6572998	6574712	0	0	0.05	0.02	9.97	6.565	0	0.03	Dis
MI706	MI706-RA	chr2	chr2	+	6574958	6576164	0.035	0	0.04	0.035	1.77	1.53	0	0	Fun	FBgn0040588	CG13841
MI707	MI707-RA	chr2	chr2	+	6576970	6582022	18.39	16.505	15.5	15.94	10.605	8.31	0.02	0.315	Fun	FBgn0039023	Nepl14
MI708	MI708-RA	chr2	chr2	+	6582688	6585686	7	7.875	5.16	5.795	4.795	4.055	0	1.145	Fun	FBgn0039022	Nepl13
MI709	MI709-RA	chr2	chr2	+	6592648	6596708	3.67	3.535	11.535	17.485	5.675	47.7	24.38	79.4	Fun	FBgn0086253	rumi
MI709	MI709-RB	chr2	chr2	+	6592648	6597053	3.67	3.535	11.535	17.485	5.675	47.7	24.38	79.4	Fun	FBgn0086253	rumi
MI710	MI710-RA	chr2	chr2	-	6592884	6594610	0	0.02	0.07	1.41	0	1.565	0	2.005	Fun
MI711	MI711-RA	chr2	chr2	-	6596504	6598585	15.24	15.49	44.76	40.255	18.765	10.63	21.215	5.225	Fun	FBgn0039019	HP1c
MI711	MI711-RB	chr2	chr2	-	6596558	6598585	15.24	15.49	44.76	40.255	18.765	10.63	21.215	5.225	Fun	FBgn0039019	HP1c
MI712	MI712-RA	chr2	chr2	+	6597457	6601762	1.015	1.98	4.715	10.03	7.135	7.76	21.835	7.125	Fun	FBgn0263143	vret
MI713	MI713-RA	chr2	chr2	-	6600862	6603373	1.835	2.075	7.085	14.09	6.955	4.765	14.025	4.42	Fun	FBgn0039017	CG6985
MI714	MI714-RA	chr2	chr2	+	6607934	6616897	4	4.15	10.57	9.605	7.145	3	8.355	1.45	Fun	FBgn0039016	Dcr-1
MI714	MI714-RB	chr2	chr2	+	6607934	6619150	4	4.15	10.57	9.605	7.145	3	8.355	1.45	Fun	FBgn0039016	Dcr-1
MI714	MI714-RC	chr2	chr2	+	6607986	6616872	4	4.15	10.57	9.605	7.145	3	8.355	1.45	Fun	FBgn0039016	Dcr-1
MI715	MI715-RA	chr2	chr2	-	6618660	6623580	10.16	11.025	26.235	20.08	24.135	19.195	20.275	6.42	Fun	FBgn0266409	CG45049
MI715	MI715-RB	chr2	chr2	-	6618700	6623580	10.16	11.025	26.235	20.08	24.135	19.195	20.275	6.42	Fun	FBgn0266409	CG45049
MI715	MI715-RC	chr2	chr2	-	6618700	6623580	10.16	11.025	26.235	20.08	24.135	19.195	20.275	6.42	Fun	FBgn0266409	CG45049
MI716	MI716-RA	chr2	chr2	+	6623893	6625471	2.54	3.41	9.595	22.12	4.87	10.07	16.615	11.77	Fun	FBgn0039013	CG4813
MI717	MI717-RA	chr2	chr2	+	6627423	6630834	16.115	17.685	10.08	15.355	18.595	10.74	34.64	10.195	Fun	FBgn0024958	Irp-1A
MI718	MI718-RA	chr2	chr2	-	6627530	6631216	0	0.01	0.035	1.425	0.01	3.915	0	5.78	Fun
MI718	MI718-RB	chr2	chr2	-	6627530	6631216	0	0.01	0.035	1.425	0.01	3.915	0	5.78	Fun
MI719	MI719-RA	chr2	chr2	+	6631645	6641976	4.235	4.95	9.775	10.02	9.99	7.61	10.065	3.11	Fun	FBgn0051151	wge
MI719	MI719-RB	chr2	chr2	+	6631645	6641976	4.235	4.95	9.775	10.02	9.99	7.61	10.065	3.11	Fun	FBgn0051151	wge
MI719	MI719-RC	chr2	chr2	+	6631652	6641976	4.235	4.95	9.775	10.02	9.99	7.61	10.065	3.11	Fun	FBgn0051151	wge
MI719	MI719-RD	chr2	chr2	+	6631652	6641976	4.235	4.95	9.775	10.02	9.99	7.61	10.065	3.11	Fun	FBgn0051151	wge
MI720	MI720-RA	chr2	chr2	-	6645293	6647623	12.26	17.7	33.795	5.975	20.475	16.69	1.51	0.415	Fun	FBgn0039008	CG6972
MI721	MI721-RA	chr2	chr2	+	6648062	6649147	0.245	0.265	2.485	0.665	0.54	0.78	0.075	0	Fun	FBgn0039007	CCAP
MI722	MI722-RA	chr2	chr2	-	6649861	6659416	5.15	7.26	3.85	6.95	6.655	5.515	4.02	2.51	Fun	FBgn0038344	obe
MI723	MI723-RA	chr2	chr2	+	6661270	6661971	0.485	1.05	11.7	4.895	4.895	4.67	0	0.095	Fun	FBgn0038343	Trissin
MI724	MI724-RA	chr2	chr2	-	6662015	6663571	3.105	2.535	0.085	0.145	8.765	9.705	0.03	0.03	Fun	FBgn0019940	Rh6
MI725	MI725-RA	chr2	chr2	-	6663685	6671534	0.2	0.455	2.225	15.7	0.595	5.685	0.535	24.46	Fun	FBgn0038342	B9d1
MI725	MI725-RB	chr2	chr2	-	6663833	6670735	0.2	0.455	2.225	15.7	0.595	5.685	0.535	24.46	Fun	FBgn0038342	B9d1
MI726	MI726-RA	chr2	chr2	+	6670767	6704923	0.96	1.06	2.49	1.745	11.48	5.01	5.34	0.225	Dis	FBgn0286071	AdamTS-A
MI726	MI726-RB	chr2	chr2	+	6684570	6704923	0.96	1.06	2.49	1.745	11.48	5.01	5.34	0.225	Dis	FBgn0286071	AdamTS-A
MI727	MI727-RA	chr2	chr2	-	6704921	6707099	0	0	57.19	2.075	3231.41	2112.53	0	0.03	Fun	FBgn0000047	Act88F
MI727	MI727-RB	chr2	chr2	-	6704963	6707101	0	0	57.19	2.075	3231.41	2112.53	0	0.03	Fun	FBgn0000047	Act88F
MI727	MI727-RC	chr2	chr2	-	6704963	6707101	0	0	57.19	2.075	3231.41	2112.53	0	0.03	Fun	FBgn0000047	Act88F
MI728	MI728-RA	chr2	chr2	-	6709273	6719463	0	0.425	0.01	95.075	0.02	269.005	0.015	269.64	Fun	FBgn0042177	Arts
MI728	MI728-RB	chr2	chr2	-	6709273	6719466	0	0.425	0.01	95.075	0.02	269.005	0.015	269.64	Fun	FBgn0042177	Arts
MI728	MI728-RC	chr2	chr2	-	6709273	6719466	0	0.425	0.01	95.075	0.02	269.005	0.015	269.64	Fun	FBgn0042177	Arts
MI728	MI728-RD	chr2	chr2	-	6709273	6726193	0	0.425	0.01	95.075	0.02	269.005	0.015	269.64	Fun	FBgn0042177	Arts
MI728	MI728-RE	chr2	chr2	-	6709273	6726193	0	0.425	0.01	95.075	0.02	269.005	0.015	269.64	Fun	FBgn0042177	Arts
MI728	MI728-RF	chr2	chr2	-	6709273	6726193	0	0.425	0.01	95.075	0.02	269.005	0.015	269.64	Fun	FBgn0042177	Arts
MI728	MI728-RG	chr2	chr2	-	6709273	6726193	0	0.425	0.01	95.075	0.02	269.005	0.015	269.64	Fun	FBgn0042177	Arts
MI728	MI728-RH	chr2	chr2	-	6709273	6726193	0	0.425	0.01	95.075	0.02	269.005	0.015	269.64	Fun	FBgn0042177	Arts
MI728	MI728-RI	chr2	chr2	-	6709273	6726193	0	0.425	0.01	95.075	0.02	269.005	0.015	269.64	Fun	FBgn0042177	Arts
MI728	MI728-RJ	chr2	chr2	-	6709274	6719466	0	0.425	0.01	95.075	0.02	269.005	0.015	269.64	Fun	FBgn0042177	Arts
MI728	MI728-RK	chr2	chr2	-	6709274	6726193	0	0.425	0.01	95.075	0.02	269.005	0.015	269.64	Fun	FBgn0042177	Arts
MI728	MI728-RL	chr2	chr2	-	6709274	6726193	0	0.425	0.01	95.075	0.02	269.005	0.015	269.64	Fun	FBgn0042177	Arts
MI729	MI729-RA	chr2	chr2	-	6713345	6714513	10.155	6.61	12.26	15.425	19.695	1.72	49.33	0.04	Fun	FBgn0037548	CG7900
MI729	MI729-RB	chr2	chr2	-	6713356	6737245	10.155	6.61	12.26	15.425	19.695	1.72	49.33	0.04	Fun	FBgn0037548	CG7900
MI729	MI729-RC	chr2	chr2	-	6713537	6737245	10.155	6.61	12.26	15.425	19.695	1.72	49.33	0.04	Fun	FBgn0037548	CG7900
MI729	MI729-RD	chr2	chr2	-	6713537	6737245	10.155	6.61	12.26	15.425	19.695	1.72	49.33	0.04	Fun	FBgn0037548	CG7900
MI728	MI728-RM	chr2	chr2	-	6715938	6726193	0	0.425	0.01	95.075	0.02	269.005	0.015	269.64	Fun	FBgn0042177	Arts
MI728	MI728-RN	chr2	chr2	-	6722622	6726193	0	0.425	0.01	95.075	0.02	269.005	0.015	269.64	Fun	FBgn0042177	Arts
MI729	MI729-RE	chr2	chr2	-	6734565	6737245	10.155	6.61	12.26	15.425	19.695	1.72	49.33	0.04	Fun	FBgn0037548	CG7900
MI730	MI730-RA	chr2	chr2	-	6739854	6742286	3.535	4.11	4.26	14.43	45.305	44.36	0.295	15.945	Fun	FBgn0037547	CG7910
MI731	MI731-RA	chr2	chr2	-	6742406	6747619	0.04	0.07	0.73	0.285	0.49	0.38	0.01	0.01	Sil	FBgn0037546	mAChR-B
MI732	MI732-RA	chr2	chr2	+	6760908	6762139	0	0	0	20.47	0	11.145	0	14.525	Fun	FBgn0034554	CAH14
MI733	MI733-RA	chr2	chr2	-	6786054	6786866	0.175	0.185	0.19	0.22	0	49.85	0	219.795	Fun
MI734	MI734-RA	chr2	chr2	-	6788832	6789996	0.125	0.045	0.245	0.47	0.04	81	0.115	2.735	Dis
MI734	MI734-RB	chr2	chr2	-	6788832	6789996	0.125	0.045	0.245	0.47	0.04	81	0.115	2.735	Dis
MI735	MI735-RA	chr2	chr2	-	6790003	6790777	48.405	20.205	48.4	31.395	4.92	4.9	0	1.025	Fun	FBgn0054034	CG34034
MI736	MI736-RA	chr2	chr2	+	6791713	6796712	4.485	3.92	4.215	3.975	7.235	2.21	0.12	0.365	Fun	FBgn0038897	CG5849
MI736	MI736-RB	chr2	chr2	+	6791728	6796252	4.485	3.92	4.215	3.975	7.235	2.21	0.12	0.365	Fun	FBgn0038897	CG5849
MI737	MI737-RA	chr2	chr2	+	6796910	6800102	165.655	318.385	0.09	0.06	63.38	21.245	0	0.075	Fun	FBgn0051343	CG31343
MI738	MI738-RA	chr2	chr2	+	6801653	6804895	79.7	135.515	0	0.115	96.075	19.505	0.015	0	Dis	FBgn0051233	CG31233
MI739	MI739-RA	chr2	chr2	+	6807562	6810919	55.51	60.705	0.125	0.385	155.345	30.485	0.04	0.13	Fun	FBgn0051198	CG31198
MI739	MI739-RB	chr2	chr2	+	6807564	6810913	55.51	60.705	0.125	0.385	155.345	30.485	0.04	0.13	Fun	FBgn0051198	CG31198
MI740	MI740-RA	chr2	chr2	+	6813408	6816627	4.21	4.19	0.21	0.48	13.21	3.985	1.265	0.065	Fun	FBgn0259237	CG42335
MI741	MI741-RA	chr2	chr2	+	6816810	6817625	0.065	0.07	3.02	2.755	0	0.455	0	0.865	Fun	FBgn0038901	Burs
MI742	MI742-RA	chr2	chr2	-	6817902	6823360	0.55	0.575	4.715	3.44	4.255	2.65	2.77	0.835	Fun	FBgn0027575	GABA-B-R2
MI742	MI742-RB	chr2	chr2	-	6817914	6822896	0.55	0.575	4.715	3.44	4.255	2.65	2.77	0.835	Fun	FBgn0027575	GABA-B-R2
MI742	MI742-RC	chr2	chr2	-	6817928	6825407	0.55	0.575	4.715	3.44	4.255	2.65	2.77	0.835	Fun	FBgn0027575	GABA-B-R2
MI743	MI743-RA	chr2	chr2	-	6826137	6827803	0	0.08	0.03	17.555	0	96.4	0	192.045	Fun	FBgn0034800	CG3788
MI744	MI744-RA	chr2	chr2	-	6828664	6833307	10.86	10.71	17.525	10.245	13.43	3.985	10.235	0.255	Fun	FBgn0003867	tsl
MI745	MI745-RA	chr2	chr2	-	6833733	6843778	4.07	4.725	46.925	25.56	21.13	17.705	16.56	4.29	Fun	FBgn0013759	CASK
MI745	MI745-RB	chr2	chr2	-	6833733	6863260	4.07	4.725	46.925	25.56	21.13	17.705	16.56	4.29	Fun	FBgn0013759	CASK
MI745	MI745-RC	chr2	chr2	-	6833733	6870860	4.07	4.725	46.925	25.56	21.13	17.705	16.56	4.29	Fun	FBgn0013759	CASK
MI745	MI745-RD	chr2	chr2	-	6833987	6859169	4.07	4.725	46.925	25.56	21.13	17.705	16.56	4.29	Fun	FBgn0013759	CASK
MI745	MI745-RE	chr2	chr2	-	6834545	6870866	4.07	4.725	46.925	25.56	21.13	17.705	16.56	4.29	Fun	FBgn0013759	CASK
MI745	MI745-RF	chr2	chr2	-	6834589	6870860	4.07	4.725	46.925	25.56	21.13	17.705	16.56	4.29	Fun	FBgn0013759	CASK
MI746	MI746-RA	chr2	chr2	+	6880488	6882512	0	0.02	1.05	0.945	0	0.04	0.025	0.04	Fun	FBgn0041229	Gr93a
MI747	MI747-RA	chr2	chr2	-	6889774	6896397	0	0	0.03	0.02	0.02	0.02	0.01	0.01	Sil	FBgn0045470	Gr93b
MI748	MI748-RA	chr2	chr2	-	6899299	6905139	8.6	7.145	109.56	60.89	27.685	15.2	44.155	7.055	Fun	FBgn0015229	glec
MI749	MI749-RA	chr2	chr2	+	6913811	6914891	14.29	13.66	28.27	64.525	19.525	40.38	31.315	53.63	Fun	FBgn0260940	lsn
MI750	MI750-RA	chr2	chr2	-	6914838	6925335	1.155	1.445	2.725	20.5	3.08	55.135	8.905	64.49	Fun	FBgn0038909	CG6569
MI750	MI750-RB	chr2	chr2	-	6914838	6925948	1.155	1.445	2.725	20.5	3.08	55.135	8.905	64.49	Fun	FBgn0038909	CG6569
MI750	MI750-RC	chr2	chr2	-	6914878	6917110	1.155	1.445	2.725	20.5	3.08	55.135	8.905	64.49	Fun	FBgn0038909	CG6569
MI751	MI751-RA	chr2	chr2	+	6916094	6917009	2.125	2.985	2.545	30.45	6.26	119.255	2.22	282.895	Fun	FBgn0051431	CG31431
MI751	MI751-RB	chr2	chr2	+	6916094	6922030	2.125	2.985	2.545	30.45	6.26	119.255	2.22	282.895	Fun	FBgn0051431	CG31431
MI751	MI751-RC	chr2	chr2	+	6917334	6923174	2.125	2.985	2.545	30.45	6.26	119.255	2.22	282.895	Fun	FBgn0051431	CG31431
MI751	MI751-RD	chr2	chr2	+	6918647	6923174	2.125	2.985	2.545	30.45	6.26	119.255	2.22	282.895	Fun	FBgn0051431	CG31431
MI752	MI752-RA	chr2	chr2	+	6923262	6928001	2.05	1.98	3.605	19.865	10.165	102.095	3.14	165.25	Dis	FBgn0053092	P5CDh2
MI752	MI752-RB	chr2	chr2	+	6923262	6928001	2.05	1.98	3.605	19.865	10.165	102.095	3.14	165.25	Dis	FBgn0053092	P5CDh2
MI753	MI753-RA	chr2	chr2	+	6928101	6931315	0	0.175	0	62.49	0	72.37	0	60.43	Fun	FBgn0051465	CG31465
MI754	MI754-RA	chr2	chr2	-	6931250	6931711	0	0	0.135	0.225	893.5	0.64	139.005	0.14	Dis	FBgn0038914	fit
MI755	MI755-RA	chr2	chr2	-	6931972	6935402	0.485	0.18	11.08	7.555	5.42	13.5	10.315	39.955	Fun	FBgn0038916	dnd
MI756	MI756-RA	chr2	chr2	+	6932313	6935982	1.055	1.005	4.815	4.25	3.24	2.085	5.565	2.11	Fun	FBgn0038917	CG6678
MI756	MI756-RB	chr2	chr2	+	6932481	6935967	1.055	1.005	4.815	4.25	3.24	2.085	5.565	2.11	Fun	FBgn0038917	CG6678
MI755	MI755-RB	chr2	chr2	-	6932871	6936214	0.485	0.18	11.08	7.555	5.42	13.5	10.315	39.955	Fun	FBgn0038916	dnd
MI757	MI757-RA	chr2	chr2	-	6936418	6937657	0	0.085	0.62	12.48	0	55.43	0	132.76	Fun	FBgn0051482	CG31482
MI758	MI758-RA	chr2	chr2	+	6962968	6965880	10.995	11.42	36.57	80.895	8.325	34.575	0	0.445	Fun	FBgn0038919	Qsox2
MI759	MI759-RA	chr2	chr2	-	6995761	6997908	0	0	1.21	0.275	0.065	0.02	0.115	0	Fun
MI760	MI760-RA	chr2	chr2	+	6999260	7065113	0.365	0.44	274.775	175.885	14.39	11.15	3.41	2.02	Fun	FBgn0264490	Eip93F
MI760	MI760-RB	chr2	chr2	+	6999260	7065134	0.365	0.44	274.775	175.885	14.39	11.15	3.41	2.02	Fun	FBgn0264490	Eip93F
MI760	MI760-RC	chr2	chr2	+	6999260	7073474	0.365	0.44	274.775	175.885	14.39	11.15	3.41	2.02	Fun	FBgn0264490	Eip93F
MI760	MI760-RD	chr2	chr2	+	6999260	7073474	0.365	0.44	274.775	175.885	14.39	11.15	3.41	2.02	Fun	FBgn0264490	Eip93F
MI760	MI760-RE	chr2	chr2	+	6999291	7072179	0.365	0.44	274.775	175.885	14.39	11.15	3.41	2.02	Fun	FBgn0264490	Eip93F
MI760	MI760-RF	chr2	chr2	+	7015119	7065134	0.365	0.44	274.775	175.885	14.39	11.15	3.41	2.02	Fun	FBgn0264490	Eip93F
MI760	MI760-RG	chr2	chr2	+	7021930	7065134	0.365	0.44	274.775	175.885	14.39	11.15	3.41	2.02	Fun	FBgn0264490	Eip93F
MI760	MI760-RH	chr2	chr2	+	7021930	7072249	0.365	0.44	274.775	175.885	14.39	11.15	3.41	2.02	Fun	FBgn0264490	Eip93F
MI760	MI760-RI	chr2	chr2	+	7021930	7073582	0.365	0.44	274.775	175.885	14.39	11.15	3.41	2.02	Fun	FBgn0264490	Eip93F
MI760	MI760-RJ	chr2	chr2	+	7025212	7073582	0.365	0.44	274.775	175.885	14.39	11.15	3.41	2.02	Fun	FBgn0264490	Eip93F
MI761	MI761-RA	chr2	chr2	-	7031620	7052101	0	0	3.695	0.705	0	0	0	0	Dis
MI762	MI762-RA	chr2	chr2	-	7045045	7045749	0	0	0	17.195	0	23.61	0	43.52	Fun	FBgn0015286	Rala
MI763	MI763-RA	chr2	chr2	+	7075679	7077188	0	0.27	0	65.205	0	292.25	0	465.325	Fun	FBgn0038921	Theg
MI764	MI764-RA	chr2	chr2	-	7077108	7084747	34.32	59.64	20.215	48.81	311.625	342.635	40.7	198.435	Dis	FBgn0019960	Mitofilin
MI764	MI764-RB	chr2	chr2	-	7078296	7080602	34.32	59.64	20.215	48.81	311.625	342.635	40.7	198.435	Dis	FBgn0019960	Mitofilin
MI765	MI765-RA	chr2	chr2	+	7084182	7085262	35.8	35.38	39.305	64.965	41.915	70.625	46.815	129.475	Fun	FBgn0038923	mRpL35
MI765	MI765-RB	chr2	chr2	+	7084182	7085262	35.8	35.38	39.305	64.965	41.915	70.625	46.815	129.475	Fun	FBgn0038923	mRpL35
MI766	MI766-RA	chr2	chr2	-	7085176	7086476	183.93	161.045	65.67	75.28	70.415	51.805	84.29	37.2	Fun	FBgn0038924	CG6028
MI767	MI767-RA	chr2	chr2	+	7087308	7091040	1.445	1.925	5.675	7.525	3.2	3.14	8.055	1.41	Fun	FBgn0039696	Rnb
MI768	MI768-RA	chr2	chr2	-	7090730	7098537	22.195	19.555	11.805	26.325	59.525	50.515	7.485	11.675	Dis	FBgn0001297	kay
MI768	MI768-RB	chr2	chr2	-	7090820	7105760	22.195	19.555	11.805	26.325	59.525	50.515	7.485	11.675	Dis	FBgn0001297	kay
MI768	MI768-RC	chr2	chr2	-	7090820	7117438	22.195	19.555	11.805	26.325	59.525	50.515	7.485	11.675	Dis	FBgn0001297	kay
MI768	MI768-RD	chr2	chr2	-	7090820	7126242	22.195	19.555	11.805	26.325	59.525	50.515	7.485	11.675	Dis	FBgn0001297	kay
MI769	MI769-RA	chr2	chr2	+	7108468	7109806	0	0.09	0	31.42	0	77.27	0.035	209.765	Fun	FBgn0039694	fig
MI770	MI770-RA	chr2	chr2	-	7134676	7140603	3.565	4.16	5.075	9.61	10.27	10.875	12.255	6.215	Fun	FBgn0260990	yata
MI771	MI771-RA	chr2	chr2	+	7140231	7141854	248.7	340.48	149.955	136.63	897.645	595.695	105.61	22.015	Fun	FBgn0020235	ATPsyngamma
MI771	MI771-RB	chr2	chr2	+	7140231	7141854	248.7	340.48	149.955	136.63	897.645	595.695	105.61	22.015	Fun	FBgn0020235	ATPsyngamma
MI771	MI771-RC	chr2	chr2	+	7140231	7141854	248.7	340.48	149.955	136.63	897.645	595.695	105.61	22.015	Fun	FBgn0020235	ATPsyngamma
MI772	MI772-RA	chr2	chr2	-	7141829	7144072	16.39	18.12	20.935	27.38	28.525	11.65	37.6	6.67	Fun	FBgn0039691	IntS11
MI773	MI773-RA	chr2	chr2	-	7144956	7147412	0	0.805	0.035	13.79	0.03	8.405	0.02	6.485	Dis	FBgn0261793	Trf2
MI774	MI774-RA	chr2	chr2	+	7147760	7148767	11.985	12.855	27.46	51.005	16.34	93.695	83.55	280.66	Fun	FBgn0038675	CG6013
MI775	MI775-RA	chr2	chr2	+	7158052	7161246	0.065	0.045	0.085	1.43	0	1.5	0	0.87	Fun	FBgn0038676	CG6026
MI776	MI776-RA	chr2	chr2	-	7162235	7217287	3.825	4.275	9.82	29	8.79	57.11	16.215	60.65	Fun	FBgn0004876	cdi
MI776	MI776-RB	chr2	chr2	-	7162235	7217299	3.825	4.275	9.82	29	8.79	57.11	16.215	60.65	Fun	FBgn0004876	cdi
MI776	MI776-RC	chr2	chr2	-	7162269	7217299	3.825	4.275	9.82	29	8.79	57.11	16.215	60.65	Fun	FBgn0004876	cdi
MI777	MI777-RA	chr2	chr2	-	7222634	7223301	22.725	27.15	26.18	29.435	64.56	20.695	241.93	32.565	Fun	FBgn0038678	mRpL55
MI778	MI778-RA	chr2	chr2	+	7223818	7224932	422.665	605.42	263.56	282	1687.36	1219.55	351.92	201.925	Fun	FBgn0016120	ATPsynD
MI778	MI778-RB	chr2	chr2	+	7223818	7224942	422.665	605.42	263.56	282	1687.36	1219.55	351.92	201.925	Fun	FBgn0016120	ATPsynD
MI779	MI779-RA	chr2	chr2	+	7231970	7266578	3.795	3.535	8.615	7.385	6.53	5.005	3.215	6.745	Fun	FBgn0038679	CG6040
MI779	MI779-RB	chr2	chr2	+	7232032	7266578	3.795	3.535	8.615	7.385	6.53	5.005	3.215	6.745	Fun	FBgn0038679	CG6040
MI780	MI780-RA	chr2	chr2	+	7267022	7270287	145.84	143.05	2.935	5.665	38.17	20.515	0.36	3.135	Fun	FBgn0038681	Cyp12a4
MI780	MI780-RB	chr2	chr2	+	7267567	7280647	145.84	143.05	2.935	5.665	38.17	20.515	0.36	3.135	Fun	FBgn0038681	Cyp12a4
MI780	MI780-RC	chr2	chr2	+	7267567	7284747	145.84	143.05	2.935	5.665	38.17	20.515	0.36	3.135	Fun	FBgn0038681	Cyp12a4
MI781	MI781-RA	chr2	chr2	-	7269664	7276802	0	0	0.07	0.18	0.06	0.2	0	0.07	Fun
MI780	MI780-RD	chr2	chr2	+	7270327	7278402	145.84	143.05	2.935	5.665	38.17	20.515	0.36	3.135	Fun	FBgn0038681	Cyp12a4
MI780	MI780-RE	chr2	chr2	+	7270327	7284747	145.84	143.05	2.935	5.665	38.17	20.515	0.36	3.135	Fun	FBgn0038681	Cyp12a4
MI780	MI780-RF	chr2	chr2	+	7270517	7284747	145.84	143.05	2.935	5.665	38.17	20.515	0.36	3.135	Fun	FBgn0038681	Cyp12a4
MI780	MI780-RG	chr2	chr2	+	7278764	7284747	145.84	143.05	2.935	5.665	38.17	20.515	0.36	3.135	Fun	FBgn0038681	Cyp12a4
MI780	MI780-RH	chr2	chr2	+	7278764	7284747	145.84	143.05	2.935	5.665	38.17	20.515	0.36	3.135	Fun	FBgn0038681	Cyp12a4
MI780	MI780-RI	chr2	chr2	+	7278764	7284747	145.84	143.05	2.935	5.665	38.17	20.515	0.36	3.135	Fun	FBgn0038681	Cyp12a4
MI780	MI780-RJ	chr2	chr2	+	7282219	7284747	145.84	143.05	2.935	5.665	38.17	20.515	0.36	3.135	Fun	FBgn0038681	Cyp12a4
MI782	MI782-RA	chr2	chr2	-	7284284	7292126	1.98	2.69	7.015	5.815	10.375	4.33	12.295	1.98	Fun	FBgn0261285	Ppcs
MI783	MI783-RA	chr2	chr2	-	7292353	7297419	17.625	15.825	23.585	25.535	36.44	19.28	6.85	2.47	Fun	FBgn0038682	CG5835
MI784	MI784-RA	chr2	chr2	-	7298211	7301234	8.695	11.935	9.395	38.505	31.43	100.07	59.33	109.61	Fun	FBgn0038683	CG11779
MI785	MI785-RA	chr2	chr2	+	7301294	7304101	0.015	0.075	0.015	1.085	9.095	1.365	131.575	2.31	Dis	FBgn0002962	nos
MI786	MI786-RA	chr2	chr2	-	7303751	7306124	9.43	11.22	13.47	22.19	28.575	11.325	74.64	15.85	Fun	FBgn0259704	Nsun5
MI786	MI786-RB	chr2	chr2	-	7304058	7306124	9.43	11.22	13.47	22.19	28.575	11.325	74.64	15.85	Fun	FBgn0259704	Nsun5
MI787	MI787-RA	chr2	chr2	-	7307946	7317481	6.415	9.07	3.085	1.65	5.935	4.24	0.355	0	Fun	FBgn0262717	Skeletor
MI788	MI788-RA	chr2	chr2	+	7320649	7323113	0.015	0.015	0	0	0	0	0	0	Sil
MI789	MI789-RA	chr2	chr2	+	7323695	7326643	100.89	83.935	59.125	42.2	83.375	41.83	27.505	2.105	Fun	FBgn0037819	CG14688
MI790	MI790-RA	chr2	chr2	+	7326968	7328934	9.31	8.005	20.56	33.27	14.215	74.625	0.845	181.025	Fun	FBgn0037818	CG6465
MI791	MI791-RA	chr2	chr2	+	7329002	7330859	4.805	3.35	2.98	4.63	9.255	6.87	0	0.485	Fun	FBgn0037818	CG6465
MI792	MI792-RA	chr2	chr2	+	7396246	7441222	7.55	8.49	90.29	49.52	8.145	5.425	0.15	0.555	Fun	FBgn0001235	hth
MI792	MI792-RB	chr2	chr2	+	7396246	7516482	7.55	8.49	90.29	49.52	8.145	5.425	0.15	0.555	Fun	FBgn0001235	hth
MI793	MI793-RA	chr2	chr2	-	7459638	7468833	0	0.015	0.02	0.13	0.38	0.06	0.36	0.06	Sil
MI794	MI794-RA	chr2	chr2	+	7587121	7621686	34.635	54.095	58.595	61.3	67.93	34.82	29.84	13.22	Fun	FBgn0024957	Irp-1B
MI794	MI794-RB	chr2	chr2	+	7587121	7621705	34.635	54.095	58.595	61.3	67.93	34.82	29.84	13.22	Fun	FBgn0024957	Irp-1B
MI794	MI794-RC	chr2	chr2	+	7587182	7616210	34.635	54.095	58.595	61.3	67.93	34.82	29.84	13.22	Fun	FBgn0024957	Irp-1B
MI795	MI795-RA	chr2	chr2	-	7587846	7589881	79.22	81.385	2.135	2.26	56.03	23.33	9.795	1.435	Fun	FBgn0037817	Cyp12e1
MI795	MI795-RB	chr2	chr2	-	7587846	7589893	79.22	81.385	2.135	2.26	56.03	23.33	9.795	1.435	Fun	FBgn0037817	Cyp12e1
MI796	MI796-RA	chr2	chr2	-	7616154	7617144	6.025	6.505	14.805	24.965	34.445	10.47	53.115	9.46	Fun	FBgn0037815	Rrp46
MI797	MI797-RA	chr2	chr2	-	7619664	7621865	0	0	0.15	0.065	9.015	0.185	37.06	0.155	Fun
MI798	MI798-RA	chr2	chr2	+	7623194	7631340	6.855	7.895	14.35	55.73	11.24	32.8	22.06	23.545	Fun	FBgn0037814	CG6325
MI798	MI798-RB	chr2	chr2	+	7623194	7631370	6.855	7.895	14.35	55.73	11.24	32.8	22.06	23.545	Fun	FBgn0037814	CG6325
MI798	MI798-RC	chr2	chr2	+	7623194	7631370	6.855	7.895	14.35	55.73	11.24	32.8	22.06	23.545	Fun	FBgn0037814	CG6325
MI798	MI798-RD	chr2	chr2	+	7623194	7631370	6.855	7.895	14.35	55.73	11.24	32.8	22.06	23.545	Fun	FBgn0037814	CG6325
MI798	MI798-RE	chr2	chr2	+	7623194	7631370	6.855	7.895	14.35	55.73	11.24	32.8	22.06	23.545	Fun	FBgn0037814	CG6325
MI798	MI798-RF	chr2	chr2	+	7623194	7631370	6.855	7.895	14.35	55.73	11.24	32.8	22.06	23.545	Fun	FBgn0037814	CG6325
MI798	MI798-RG	chr2	chr2	+	7623194	7631374	6.855	7.895	14.35	55.73	11.24	32.8	22.06	23.545	Fun	FBgn0037814	CG6325
MI798	MI798-RH	chr2	chr2	+	7623194	7631374	6.855	7.895	14.35	55.73	11.24	32.8	22.06	23.545	Fun	FBgn0037814	CG6325
MI798	MI798-RI	chr2	chr2	+	7623194	7631374	6.855	7.895	14.35	55.73	11.24	32.8	22.06	23.545	Fun	FBgn0037814	CG6325
MI798	MI798-RJ	chr2	chr2	+	7623248	7631370	6.855	7.895	14.35	55.73	11.24	32.8	22.06	23.545	Fun	FBgn0037814	CG6325
MI798	MI798-RK	chr2	chr2	+	7623248	7631370	6.855	7.895	14.35	55.73	11.24	32.8	22.06	23.545	Fun	FBgn0037814	CG6325
MI798	MI798-RL	chr2	chr2	+	7623248	7631370	6.855	7.895	14.35	55.73	11.24	32.8	22.06	23.545	Fun	FBgn0037814	CG6325
MI798	MI798-RM	chr2	chr2	+	7623248	7631370	6.855	7.895	14.35	55.73	11.24	32.8	22.06	23.545	Fun	FBgn0037814	CG6325
MI798	MI798-RN	chr2	chr2	+	7623248	7631370	6.855	7.895	14.35	55.73	11.24	32.8	22.06	23.545	Fun	FBgn0037814	CG6325
MI798	MI798-RO	chr2	chr2	+	7623248	7631370	6.855	7.895	14.35	55.73	11.24	32.8	22.06	23.545	Fun	FBgn0037814	CG6325
MI798	MI798-RP	chr2	chr2	+	7623248	7631370	6.855	7.895	14.35	55.73	11.24	32.8	22.06	23.545	Fun	FBgn0037814	CG6325
MI798	MI798-RQ	chr2	chr2	+	7627484	7631374	6.855	7.895	14.35	55.73	11.24	32.8	22.06	23.545	Fun	FBgn0037814	CG6325
MI799	MI799-RA	chr2	chr2	-	7633444	7635838	0	0	1.615	2.605	0.28	0.055	0	0.15	Fun	FBgn0045443	mthl11
MI799	MI799-RB	chr2	chr2	-	7633575	7635793	0	0	1.615	2.605	0.28	0.055	0	0.15	Fun	FBgn0045443	mthl11
MI800	MI800-RA	chr2	chr2	-	7635979	7647777	5.69	5.88	9.385	18.64	12.22	80.315	2.75	83.365	Fun	FBgn0259938	cwo
MI800	MI800-RB	chr2	chr2	-	7635979	7647777	5.69	5.88	9.385	18.64	12.22	80.315	2.75	83.365	Fun	FBgn0259938	cwo
MI800	MI800-RC	chr2	chr2	-	7635979	7654697	5.69	5.88	9.385	18.64	12.22	80.315	2.75	83.365	Fun	FBgn0259938	cwo
MI800	MI800-RD	chr2	chr2	-	7635980	7647775	5.69	5.88	9.385	18.64	12.22	80.315	2.75	83.365	Fun	FBgn0259938	cwo
MI800	MI800-RE	chr2	chr2	-	7635981	7654681	5.69	5.88	9.385	18.64	12.22	80.315	2.75	83.365	Fun	FBgn0259938	cwo
MI800	MI800-RF	chr2	chr2	-	7635991	7654681	5.69	5.88	9.385	18.64	12.22	80.315	2.75	83.365	Fun	FBgn0259938	cwo
MI801	MI801-RA	chr2	chr2	+	7655411	7707715	1.58	2.59	8.015	34.3	6.395	31.915	14.15	43.395	Fun	FBgn0020379	Rfx
MI801	MI801-RB	chr2	chr2	+	7655416	7663450	1.58	2.59	8.015	34.3	6.395	31.915	14.15	43.395	Fun	FBgn0020379	Rfx
MI801	MI801-RC	chr2	chr2	+	7655416	7698138	1.58	2.59	8.015	34.3	6.395	31.915	14.15	43.395	Fun	FBgn0020379	Rfx
MI801	MI801-RD	chr2	chr2	+	7655416	7708081	1.58	2.59	8.015	34.3	6.395	31.915	14.15	43.395	Fun	FBgn0020379	Rfx
MI801	MI801-RE	chr2	chr2	+	7655432	7663534	1.58	2.59	8.015	34.3	6.395	31.915	14.15	43.395	Fun	FBgn0020379	Rfx
MI801	MI801-RF	chr2	chr2	+	7655432	7707524	1.58	2.59	8.015	34.3	6.395	31.915	14.15	43.395	Fun	FBgn0020379	Rfx
MI801	MI801-RG	chr2	chr2	+	7670310	7687212	1.58	2.59	8.015	34.3	6.395	31.915	14.15	43.395	Fun	FBgn0020379	Rfx
MI802	MI802-RA	chr2	chr2	-	7672663	7677362	0	1.155	0	90.455	0	115.46	0	211.44	Fun
MI802	MI802-RB	chr2	chr2	-	7672663	7688414	0	1.155	0	90.455	0	115.46	0	211.44	Fun
MI801	MI801-RH	chr2	chr2	+	7673121	7708081	1.58	2.59	8.015	34.3	6.395	31.915	14.15	43.395	Fun	FBgn0020379	Rfx
MI801	MI801-RI	chr2	chr2	+	7673424	7707524	1.58	2.59	8.015	34.3	6.395	31.915	14.15	43.395	Fun	FBgn0020379	Rfx
MI801	MI801-RJ	chr2	chr2	+	7673966	7675455	1.58	2.59	8.015	34.3	6.395	31.915	14.15	43.395	Fun	FBgn0020379	Rfx
MI801	MI801-RK	chr2	chr2	+	7673966	7698136	1.58	2.59	8.015	34.3	6.395	31.915	14.15	43.395	Fun	FBgn0020379	Rfx
MI803	MI803-RA	chr2	chr2	-	7676786	7710195	0	3.595	0.04	231.99	0	339.58	0	840.91	Fun
MI803	MI803-RB	chr2	chr2	-	7683426	7700534	0	3.595	0.04	231.99	0	339.58	0	840.91	Fun
MI803	MI803-RC	chr2	chr2	-	7683758	7700534	0	3.595	0.04	231.99	0	339.58	0	840.91	Fun
MI803	MI803-RD	chr2	chr2	-	7696594	7700534	0	3.595	0.04	231.99	0	339.58	0	840.91	Fun
MI803	MI803-RE	chr2	chr2	-	7696594	7700534	0	3.595	0.04	231.99	0	339.58	0	840.91	Fun
MI803	MI803-RF	chr2	chr2	-	7696594	7710198	0	3.595	0.04	231.99	0	339.58	0	840.91	Fun
MI801	MI801-RL	chr2	chr2	+	7696925	7708081	1.58	2.59	8.015	34.3	6.395	31.915	14.15	43.395	Fun	FBgn0020379	Rfx
MI801	MI801-RM	chr2	chr2	+	7696972	7698136	1.58	2.59	8.015	34.3	6.395	31.915	14.15	43.395	Fun	FBgn0020379	Rfx
MI803	MI803-RG	chr2	chr2	-	7706266	7710198	0	3.595	0.04	231.99	0	339.58	0	840.91	Fun
MI804	MI804-RA	chr2	chr2	-	7710888	7723774	2.86	3.41	14.01	18.14	3.795	5.195	17.99	4.02	Fun	FBgn0015396	jumu
MI805	MI805-RA	chr2	chr2	-	7727449	7731107	0.025	1.095	0.425	13.08	2.4	12.99	3.115	16.27	Dis	FBgn0000246	c(3)G
MI805	MI805-RB	chr2	chr2	-	7727449	7731107	0.025	1.095	0.425	13.08	2.4	12.99	3.115	16.27	Dis	FBgn0000246	c(3)G
MI806	MI806-RA	chr2	chr2	-	7732800	7738259	3.915	6.035	13.3	39.675	42.82	29.755	57.425	21.31	Dis	FBgn0037810	sle
MI806	MI806-RB	chr2	chr2	-	7732800	7740481	3.915	6.035	13.3	39.675	42.82	29.755	57.425	21.31	Dis	FBgn0037810	sle
MI806	MI806-RC	chr2	chr2	-	7732800	7740688	3.915	6.035	13.3	39.675	42.82	29.755	57.425	21.31	Dis	FBgn0037810	sle
MI806	MI806-RD	chr2	chr2	-	7732803	7740481	3.915	6.035	13.3	39.675	42.82	29.755	57.425	21.31	Dis	FBgn0037810	sle
MI806	MI806-RE	chr2	chr2	-	7732803	7740688	3.915	6.035	13.3	39.675	42.82	29.755	57.425	21.31	Dis	FBgn0037810	sle
MI806	MI806-RF	chr2	chr2	-	7732808	7740688	3.915	6.035	13.3	39.675	42.82	29.755	57.425	21.31	Dis	FBgn0037810	sle
MI806	MI806-RG	chr2	chr2	-	7732808	7740688	3.915	6.035	13.3	39.675	42.82	29.755	57.425	21.31	Dis	FBgn0037810	sle
MI806	MI806-RH	chr2	chr2	-	7732808	7740688	3.915	6.035	13.3	39.675	42.82	29.755	57.425	21.31	Dis	FBgn0037810	sle
MI807	MI807-RA	chr2	chr2	+	7739757	7760250	4.325	5.64	8.215	27.15	9.64	27.395	7.065	16.165	Fun	FBgn0266717	Bruce
MI807	MI807-RB	chr2	chr2	+	7739757	7760250	4.325	5.64	8.215	27.15	9.64	27.395	7.065	16.165	Fun	FBgn0266717	Bruce
MI807	MI807-RC	chr2	chr2	+	7739757	7760250	4.325	5.64	8.215	27.15	9.64	27.395	7.065	16.165	Fun	FBgn0266717	Bruce
MI807	MI807-RD	chr2	chr2	+	7739757	7760250	4.325	5.64	8.215	27.15	9.64	27.395	7.065	16.165	Fun	FBgn0266717	Bruce
MI807	MI807-RE	chr2	chr2	+	7740204	7760264	4.325	5.64	8.215	27.15	9.64	27.395	7.065	16.165	Fun	FBgn0266717	Bruce
MI807	MI807-RF	chr2	chr2	+	7740204	7760264	4.325	5.64	8.215	27.15	9.64	27.395	7.065	16.165	Fun	FBgn0266717	Bruce
MI807	MI807-RG	chr2	chr2	+	7740204	7760264	4.325	5.64	8.215	27.15	9.64	27.395	7.065	16.165	Fun	FBgn0266717	Bruce
MI807	MI807-RH	chr2	chr2	+	7740204	7760264	4.325	5.64	8.215	27.15	9.64	27.395	7.065	16.165	Fun	FBgn0266717	Bruce
MI807	MI807-RI	chr2	chr2	+	7740319	7760260	4.325	5.64	8.215	27.15	9.64	27.395	7.065	16.165	Fun	FBgn0266717	Bruce
MI807	MI807-RJ	chr2	chr2	+	7740329	7760248	4.325	5.64	8.215	27.15	9.64	27.395	7.065	16.165	Fun	FBgn0266717	Bruce
MI808	MI808-RA	chr2	chr2	+	7761512	7765135	0.665	0.235	0.295	0.2	13.76	9.35	15.205	0.175	Fun	FBgn0037807	CG6293
MI809	MI809-RA	chr2	chr2	-	7764378	7819310	3.81	4.76	4.27	12.085	12.32	16.11	13.81	10.385	Fun	FBgn0262617	Nuak
MI809	MI809-RB	chr2	chr2	-	7764378	7819313	3.81	4.76	4.27	12.085	12.32	16.11	13.81	10.385	Fun	FBgn0262617	Nuak
MI809	MI809-RC	chr2	chr2	-	7764379	7819254	3.81	4.76	4.27	12.085	12.32	16.11	13.81	10.385	Fun	FBgn0262617	Nuak
MI809	MI809-RD	chr2	chr2	-	7764394	7819313	3.81	4.76	4.27	12.085	12.32	16.11	13.81	10.385	Fun	FBgn0262617	Nuak
MI809	MI809-RE	chr2	chr2	-	7770090	7819313	3.81	4.76	4.27	12.085	12.32	16.11	13.81	10.385	Fun	FBgn0262617	Nuak
MI810	MI810-RA	chr2	chr2	-	7819519	7821286	17.63	20.11	37.805	139.33	37.09	72.8	43.355	53.555	Fun	FBgn0040078	pont
MI811	MI811-RA	chr2	chr2	+	7828794	7831271	0	0.035	1.5	1.2	0	0.085	0	0.08	Fun
MI812	MI812-RA	chr2	chr2	-	7836595	7840158	46.31	33.085	72.72	112.16	22.275	17.16	0.015	7.92	Fun	FBgn0037801	CG3999
MI813	MI813-RA	chr2	chr2	-	7840274	7859635	0.035	0.075	0.455	8.155	2.55	14.825	0	5.665	Fun	FBgn0261928	CG42795
MI813	MI813-RB	chr2	chr2	-	7840296	7859635	0.035	0.075	0.455	8.155	2.55	14.825	0	5.665	Fun	FBgn0261928	CG42795
MI814	MI814-RA	chr2	chr2	-	7860851	7861609	0	0.41	1.565	43.635	0.315	175.835	0	279.655	Fun	FBgn0083943	CG34107
MI815	MI815-RA	chr2	chr2	+	7860965	7862659	0.045	0.22	8.36	5.45	2.39	3.155	0.145	2.235	Fun	FBgn0037798	CG12817
MI815	MI815-RB	chr2	chr2	+	7861427	7862652	0.045	0.22	8.36	5.45	2.39	3.155	0.145	2.235	Fun	FBgn0037798	CG12817
MI816	MI816-RA	chr2	chr2	-	7863974	7890537	0.515	0.65	3.48	1.665	5.67	5.805	0.21	1.33	Fun	FBgn0004575	Syn
MI817	MI817-RA	chr2	chr2	+	7873406	7883602	10.895	10.65	11.065	10.415	47.345	27.8	12.775	15.395	Fun	FBgn0025879	Timp
MI818	MI818-RA	chr2	chr2	+	7891262	7907884	9.075	9.8	23.325	17.82	21.375	15.69	0.82	0.665	Fun	FBgn0037796	CG12814
MI818	MI818-RB	chr2	chr2	+	7891284	7907881	9.075	9.8	23.325	17.82	21.375	15.69	0.82	0.665	Fun	FBgn0037796	CG12814
MI818	MI818-RC	chr2	chr2	+	7891284	7907882	9.075	9.8	23.325	17.82	21.375	15.69	0.82	0.665	Fun	FBgn0037796	CG12814
MI818	MI818-RD	chr2	chr2	+	7891286	7907884	9.075	9.8	23.325	17.82	21.375	15.69	0.82	0.665	Fun	FBgn0037796	CG12814
MI818	MI818-RE	chr2	chr2	+	7891286	7907884	9.075	9.8	23.325	17.82	21.375	15.69	0.82	0.665	Fun	FBgn0037796	CG12814
MI819	MI819-RA	chr2	chr2	+	7909444	7917279	6.81	8.42	9.67	8.025	23.635	6.57	16.075	1.58	Fun	FBgn0040238	Best1
MI819	MI819-RB	chr2	chr2	+	7909444	7917887	6.81	8.42	9.67	8.025	23.635	6.57	16.075	1.58	Fun	FBgn0040238	Best1
MI819	MI819-RC	chr2	chr2	+	7909448	7917887	6.81	8.42	9.67	8.025	23.635	6.57	16.075	1.58	Fun	FBgn0040238	Best1
MI819	MI819-RD	chr2	chr2	+	7909451	7917264	6.81	8.42	9.67	8.025	23.635	6.57	16.075	1.58	Fun	FBgn0040238	Best1
MI820	MI820-RA	chr2	chr2	-	7917863	7918523	0	0.29	0	40.735	0	41.33	0	308.335	Fun
MI821	MI821-RA	chr2	chr2	+	7923610	7925660	3.09	3.805	12.555	22.235	8.5	19.44	13.15	13.215	Fun	FBgn0037794	CG6254
MI822	MI822-RA	chr2	chr2	-	7925619	7940614	1.975	2.065	10.89	7.39	17.35	9.9	7.53	5.65	Fun	FBgn0086359	Invadolysin
MI823	MI823-RA	chr2	chr2	+	7931145	7931774	0	0.105	0	6.95	0	6.88	0	47.28	Fun
MI824	MI824-RA	chr2	chr2	+	7941331	7943662	0	0.125	0.065	18.435	0.405	70.98	0	95.23	Fun	FBgn0061197	salto
MI825	MI825-RA	chr2	chr2	-	7943652	7947137	3.55	4.25	8.125	16.1	7.03	9.16	17.85	12.105	Fun	FBgn0038491	CG5292
MI826	MI826-RA	chr2	chr2	+	7946478	7951454	1.14	1.51	2.315	26.35	3.98	116.35	11.375	140.88	Fun	FBgn0038488	m-cup
MI827	MI827-RA	chr2	chr2	-	7954817	7958248	24.47	21.525	86.915	107.16	5.045	5.465	0.155	5.475	Fun	FBgn0001321	knk
MI827	MI827-RB	chr2	chr2	-	7954845	7958324	24.47	21.525	86.915	107.16	5.045	5.465	0.155	5.475	Fun	FBgn0001321	knk
MI828	MI828-RA	chr2	chr2	-	7959031	7962585	7.95	9.775	25.565	25.595	30.495	12.445	39.755	5.495	Dis	FBgn0004889	tws
MI829	MI829-RA	chr2	chr2	-	7962642	7969246	9.05	14.66	13.84	31.055	39.475	20.65	69.6	10.765	Fun	FBgn0037792	TAF1B
MI829	MI829-RB	chr2	chr2	-	7962642	7969246	9.05	14.66	13.84	31.055	39.475	20.65	69.6	10.765	Fun	FBgn0037792	TAF1B
MI829	MI829-RC	chr2	chr2	-	7962642	7975600	9.05	14.66	13.84	31.055	39.475	20.65	69.6	10.765	Fun	FBgn0037792	TAF1B
MI829	MI829-RD	chr2	chr2	-	7962642	7978987	9.05	14.66	13.84	31.055	39.475	20.65	69.6	10.765	Fun	FBgn0037792	TAF1B
MI829	MI829-RE	chr2	chr2	-	7962643	7978936	9.05	14.66	13.84	31.055	39.475	20.65	69.6	10.765	Fun	FBgn0037792	TAF1B
MI830	MI830-RA	chr2	chr2	-	7979656	7984186	0.68	0.78	3.895	4.065	9.2	5.155	4.575	2.595	Dis	FBgn0035842	Setx
MI830	MI830-RB	chr2	chr2	-	7979656	7984186	0.68	0.78	3.895	4.065	9.2	5.155	4.575	2.595	Dis	FBgn0035842	Setx
MI831	MI831-RA	chr2	chr2	-	7985519	8016054	1.895	2.58	13.545	11.96	6.61	6.435	8.435	3.26	Fun	FBgn0262127	kibra
MI831	MI831-RB	chr2	chr2	-	7985521	7992632	1.895	2.58	13.545	11.96	6.61	6.435	8.435	3.26	Fun	FBgn0262127	kibra
MI832	MI832-RA	chr2	chr2	+	8020561	8021184	0	0.11	0	14.74	0	16.075	0	97.76	Fun
MI832	MI832-RB	chr2	chr2	+	8020561	8031316	0	0.11	0	14.74	0	16.075	0	97.76	Fun
MI832	MI832-RC	chr2	chr2	+	8020586	8021183	0	0.11	0	14.74	0	16.075	0	97.76	Fun
MI832	MI832-RD	chr2	chr2	+	8020586	8031316	0	0.11	0	14.74	0	16.075	0	97.76	Fun
MI832	MI832-RE	chr2	chr2	+	8020586	8031316	0	0.11	0	14.74	0	16.075	0	97.76	Fun
MI833	MI833-RA	chr2	chr2	-	8022222	8027239	2.675	3.165	4.125	8.665	28.95	19.62	32.1	16.385	Fun	FBgn0038256	CG7530
MI833	MI833-RB	chr2	chr2	-	8022222	8034478	2.675	3.165	4.125	8.665	28.95	19.62	32.1	16.385	Fun	FBgn0038256	CG7530
MI833	MI833-RC	chr2	chr2	-	8022222	8034478	2.675	3.165	4.125	8.665	28.95	19.62	32.1	16.385	Fun	FBgn0038256	CG7530
MI834	MI834-RA	chr2	chr2	-	8035421	8046343	126.825	119.885	269.565	211.37	223.985	233.22	266.345	231.31	Fun
MI834	MI834-RB	chr2	chr2	-	8035421	8046440	126.825	119.885	269.565	211.37	223.985	233.22	266.345	231.31	Fun
MI834	MI834-RC	chr2	chr2	-	8035465	8046402	126.825	119.885	269.565	211.37	223.985	233.22	266.345	231.31	Fun
MI834	MI834-RD	chr2	chr2	-	8035640	8046343	126.825	119.885	269.565	211.37	223.985	233.22	266.345	231.31	Fun
MI835	MI835-RA	chr2	chr2	+	8046017	8115664	6.285	6.4	20.24	18.125	12.07	8.61	14.49	4.755	Dis	FBgn0263929	jvl
MI835	MI835-RB	chr2	chr2	+	8046100	8115683	6.285	6.4	20.24	18.125	12.07	8.61	14.49	4.755	Dis	FBgn0263929	jvl
MI835	MI835-RC	chr2	chr2	+	8046142	8115673	6.285	6.4	20.24	18.125	12.07	8.61	14.49	4.755	Dis	FBgn0263929	jvl
MI836	MI836-RA	chr2	chr2	-	8053103	8054400	94.48	108.195	0.695	1.315	519.745	239.34	0.585	4.565	Fun	FBgn0038257	smp-30
MI836	MI836-RB	chr2	chr2	-	8053108	8054400	94.48	108.195	0.695	1.315	519.745	239.34	0.585	4.565	Fun	FBgn0038257	smp-30
MI835	MI835-RD	chr2	chr2	+	8057586	8115683	6.285	6.4	20.24	18.125	12.07	8.61	14.49	4.755	Dis	FBgn0263929	jvl
MI835	MI835-RE	chr2	chr2	+	8057586	8115683	6.285	6.4	20.24	18.125	12.07	8.61	14.49	4.755	Dis	FBgn0263929	jvl
MI835	MI835-RF	chr2	chr2	+	8057630	8076902	6.285	6.4	20.24	18.125	12.07	8.61	14.49	4.755	Dis	FBgn0263929	jvl
MI835	MI835-RG	chr2	chr2	+	8057630	8115656	6.285	6.4	20.24	18.125	12.07	8.61	14.49	4.755	Dis	FBgn0263929	jvl
MI837	MI837-RA	chr2	chr2	+	8089728	8091205	1.15	1.225	17.165	9.68	0.81	0.785	0.915	0.375	Fun
MI838	MI838-RA	chr2	chr2	+	8117568	8120267	1.07	0.755	1.37	0.27	1.68	1.63	0.015	1.325	Fun	FBgn0038260	CG14855
MI839	MI839-RA	chr2	chr2	+	8121477	8123751	0.625	0.595	2.205	0.465	1.63	0.6	0.195	2.63	Fun	FBgn0038261	CG14856
MI840	MI840-RA	chr2	chr2	-	8121833	8122517	0	0	0	0.265	0	1.82	0	2.8	Dis
MI839	MI839-RB	chr2	chr2	+	8122301	8123756	0.625	0.595	2.205	0.465	1.63	0.6	0.195	2.63	Fun	FBgn0038261	CG14856
MI841	MI841-RA	chr2	chr2	+	8124654	8128757	4.695	4.82	0.395	0.755	3.5	2.645	0.055	0.45	Fun	FBgn0038262	CG14857
MI842	MI842-RA	chr2	chr2	-	8130593	8135101	9.07	9.975	35.28	24.385	21.65	14.8	12.63	5.81	Dis	FBgn0266756	btsz
MI842	MI842-RB	chr2	chr2	-	8130593	8175646	9.07	9.975	35.28	24.385	21.65	14.8	12.63	5.81	Dis	FBgn0266756	btsz
MI842	MI842-RC	chr2	chr2	-	8130593	8175673	9.07	9.975	35.28	24.385	21.65	14.8	12.63	5.81	Dis	FBgn0266756	btsz
MI842	MI842-RD	chr2	chr2	-	8130593	8175686	9.07	9.975	35.28	24.385	21.65	14.8	12.63	5.81	Dis	FBgn0266756	btsz
MI842	MI842-RE	chr2	chr2	-	8130595	8175644	9.07	9.975	35.28	24.385	21.65	14.8	12.63	5.81	Dis	FBgn0266756	btsz
MI842	MI842-RF	chr2	chr2	-	8130595	8175644	9.07	9.975	35.28	24.385	21.65	14.8	12.63	5.81	Dis	FBgn0266756	btsz
MI842	MI842-RG	chr2	chr2	-	8130597	8175673	9.07	9.975	35.28	24.385	21.65	14.8	12.63	5.81	Dis	FBgn0266756	btsz
MI842	MI842-RH	chr2	chr2	-	8130602	8175686	9.07	9.975	35.28	24.385	21.65	14.8	12.63	5.81	Dis	FBgn0266756	btsz
MI843	MI843-RA	chr2	chr2	+	8209606	8212557	1.435	1.705	3.4	2.67	7.325	4.26	6.125	0.82	Fun	FBgn0038268	CG3631
MI844	MI844-RA	chr2	chr2	-	8212285	8215893	4.875	5.055	10.42	31.11	16.975	49.59	21.85	54.375	Fun	FBgn0038269	Rrp6
MI844	MI844-RB	chr2	chr2	-	8212285	8217237	4.875	5.055	10.42	31.11	16.975	49.59	21.85	54.375	Fun	FBgn0038269	Rrp6
MI845	MI845-RA	chr2	chr2	+	8215516	8218570	7.63	7.49	11.02	14.88	13.97	15.115	58.215	24.175	Fun	FBgn0067628	CG33331
MI845	MI845-RB	chr2	chr2	+	8215516	8218574	7.63	7.49	11.02	14.88	13.97	15.115	58.215	24.175	Fun	FBgn0067628	CG33331
MI845	MI845-RC	chr2	chr2	+	8215616	8218574	7.63	7.49	11.02	14.88	13.97	15.115	58.215	24.175	Fun	FBgn0067628	CG33331
MI845	MI845-RD	chr2	chr2	+	8215616	8218574	7.63	7.49	11.02	14.88	13.97	15.115	58.215	24.175	Fun	FBgn0067628	CG33331
MI845	MI845-RE	chr2	chr2	+	8215691	8217295	7.63	7.49	11.02	14.88	13.97	15.115	58.215	24.175	Fun	FBgn0067628	CG33331
MI845	MI845-RF	chr2	chr2	+	8215691	8218559	7.63	7.49	11.02	14.88	13.97	15.115	58.215	24.175	Fun	FBgn0067628	CG33331
MI846	MI846-RA	chr2	chr2	-	8218486	8219683	5.27	4.78	17.465	26.2	7.95	9.545	23.665	9.765	Fun	FBgn0004597	CycC
MI847	MI847-RA	chr2	chr2	+	8219500	8221876	136.53	206.475	67.925	133.7	662.725	553.54	91.865	115.48	Fun	FBgn0038271	UQCR-C1
MI848	MI848-RA	chr2	chr2	-	8221675	8223729	21.45	17.48	50.225	54.075	15.13	10.465	18.585	7.1	Fun	FBgn0038272	Dph2
MI849	MI849-RA	chr2	chr2	+	8224012	8229989	7.57	9.925	26.885	27.705	18.32	8.84	43.71	4.045	Fun	FBgn0004227	nonA
MI850	MI850-RA	chr2	chr2	-	8234835	8236888	0.015	0.075	3.28	1.91	0.015	0.035	0.02	0.33	Dis	FBgn0031373	CG15358
MI851	MI851-RA	chr2	chr2	-	8237208	8239007	0	0.02	0.09	0.02	0	0	0.225	0.03	Sil	FBgn0262366	CG43064
MI852	MI852-RA	chr2	chr2	+	8241937	8243317	70.67	61.79	112.585	128.335	55.965	78.94	76.445	52.23	Fun	FBgn0024432	Dlc90F
MI852	MI852-RB	chr2	chr2	+	8241942	8243317	70.67	61.79	112.585	128.335	55.965	78.94	76.445	52.23	Fun	FBgn0024432	Dlc90F
MI853	MI853-RA	chr2	chr2	-	8243195	8244694	8.105	9.705	13.36	29.345	24.1	25.54	60.995	54.86	Fun	FBgn0038601	CG18600
MI854	MI854-RA	chr2	chr2	-	8252649	8253205	0.95	3.09	0.755	0.235	213.91	120.18	3.195	5.205	Fun	FBgn0040582	BomBc3
MI854	MI854-RB	chr2	chr2	-	8252649	8253205	0.95	3.09	0.755	0.235	213.91	120.18	3.195	5.205	Fun	FBgn0040582	BomBc3
MI855	MI855-RA	chr2	chr2	+	8253971	8254951	17.715	17.065	22.115	20.295	116.61	68.735	0.685	3.025	Fun	FBgn0038930	BomT3
MI856	MI856-RA	chr2	chr2	-	8256719	8261147	0	0	0.505	0.14	0.305	0.325	0	0	Sil	FBgn0038929	CG13408
MI857	MI857-RA	chr2	chr2	+	8263488	8264355	7.085	7.335	12.095	16.325	25.015	14.795	281.17	48.055	Fun	FBgn0038234	mRpL11
MI858	MI858-RA	chr2	chr2	-	8264276	8265312	8.55	9.015	13.775	27.525	30.4	29.65	87.68	44.22	Fun	FBgn0038235	CG8461
MI859	MI859-RA	chr2	chr2	+	8269455	8278054	3.345	3.9	6.405	13.96	29.71	26.24	13.89	11.9	Fun	FBgn0039430	CG5455
MI859	MI859-RB	chr2	chr2	+	8269455	8278210	3.345	3.9	6.405	13.96	29.71	26.24	13.89	11.9	Fun	FBgn0039430	CG5455
MI859	MI859-RC	chr2	chr2	+	8269474	8278210	3.345	3.9	6.405	13.96	29.71	26.24	13.89	11.9	Fun	FBgn0039430	CG5455
MI859	MI859-RD	chr2	chr2	+	8272424	8278210	3.345	3.9	6.405	13.96	29.71	26.24	13.89	11.9	Fun	FBgn0039430	CG5455
MI859	MI859-RE	chr2	chr2	+	8272821	8278054	3.345	3.9	6.405	13.96	29.71	26.24	13.89	11.9	Fun	FBgn0039430	CG5455
MI859	MI859-RF	chr2	chr2	+	8273843	8278210	3.345	3.9	6.405	13.96	29.71	26.24	13.89	11.9	Fun	FBgn0039430	CG5455
MI860	MI860-RA	chr2	chr2	-	8278348	8343827	0.905	1.38	5.95	4.145	2.255	0.92	0.875	0.725	Fun	FBgn0039431	plum
MI861	MI861-RA	chr2	chr2	+	8293513	8294393	0	0	0	1.685	0	2.275	0	1.925	Fun
MI862	MI862-RA	chr2	chr2	-	8296720	8297388	0	0	0	0	0.07	15.135	0	0.385	Dis
MI863	MI863-RA	chr2	chr2	-	8344716	8349087	7.64	8.785	30.025	49.64	25.415	30.19	31.565	17.475	Fun	FBgn0039581	Moca-cyp
MI863	MI863-RB	chr2	chr2	-	8344717	8349446	7.64	8.785	30.025	49.64	25.415	30.19	31.565	17.475	Fun	FBgn0039581	Moca-cyp
MI864	MI864-RA	chr2	chr2	+	8348997	8352492	55.02	56.19	38.71	40.825	21.32	17.405	21.44	6.86	Fun	FBgn0039580	Gfat2
MI865	MI865-RA	chr2	chr2	+	8355252	8374792	9.635	9.95	21.67	30.775	53.48	22.275	40.235	3.37	Fun	FBgn0261618	larp
MI865	MI865-RB	chr2	chr2	+	8355337	8375177	9.635	9.95	21.67	30.775	53.48	22.275	40.235	3.37	Fun	FBgn0261618	larp
MI865	MI865-RC	chr2	chr2	+	8355615	8375087	9.635	9.95	21.67	30.775	53.48	22.275	40.235	3.37	Fun	FBgn0261618	larp
MI865	MI865-RD	chr2	chr2	+	8356439	8375177	9.635	9.95	21.67	30.775	53.48	22.275	40.235	3.37	Fun	FBgn0261618	larp
MI865	MI865-RE	chr2	chr2	+	8356439	8375177	9.635	9.95	21.67	30.775	53.48	22.275	40.235	3.37	Fun	FBgn0261618	larp
MI865	MI865-RF	chr2	chr2	+	8356538	8375027	9.635	9.95	21.67	30.775	53.48	22.275	40.235	3.37	Fun	FBgn0261618	larp
MI865	MI865-RG	chr2	chr2	+	8360081	8375027	9.635	9.95	21.67	30.775	53.48	22.275	40.235	3.37	Fun	FBgn0261618	larp
MI865	MI865-RH	chr2	chr2	+	8364632	8375027	9.635	9.95	21.67	30.775	53.48	22.275	40.235	3.37	Fun	FBgn0261618	larp
MI865	MI865-RI	chr2	chr2	+	8366125	8375177	9.635	9.95	21.67	30.775	53.48	22.275	40.235	3.37	Fun	FBgn0261618	larp
MI865	MI865-RJ	chr2	chr2	+	8366336	8375177	9.635	9.95	21.67	30.775	53.48	22.275	40.235	3.37	Fun	FBgn0261618	larp
MI866	MI866-RA	chr2	chr2	+	8391988	8392324	0	0.25	0	17.55	0	111.68	0	851.125	Dis
MI867	MI867-RA	chr2	chr2	+	8392703	8393638	0	0.615	0	82.125	0	250.34	0	492.57	Fun	FBgn0038925	Cchl
MI868	MI868-RA	chr2	chr2	+	8394407	8395487	0	0	0	36.285	0	128.23	0	510.36	Fun	FBgn0039577	CG12516
MI869	MI869-RA	chr2	chr2	-	8404036	8407918	0	0.96	0	184.645	0.01	632.03	0.05	970.125	Fun	FBgn0004171	Mst98Cb
MI869	MI869-RB	chr2	chr2	-	8404036	8407918	0	0.96	0	184.645	0.01	632.03	0.05	970.125	Fun	FBgn0004171	Mst98Cb
MI869	MI869-RC	chr2	chr2	-	8404036	8407930	0	0.96	0	184.645	0.01	632.03	0.05	970.125	Fun	FBgn0004171	Mst98Cb
MI869	MI869-RD	chr2	chr2	-	8404036	8407930	0	0.96	0	184.645	0.01	632.03	0.05	970.125	Fun	FBgn0004171	Mst98Cb
MI869	MI869-RE	chr2	chr2	-	8404036	8407930	0	0.96	0	184.645	0.01	632.03	0.05	970.125	Fun	FBgn0004171	Mst98Cb
MI869	MI869-RF	chr2	chr2	-	8404036	8407930	0	0.96	0	184.645	0.01	632.03	0.05	970.125	Fun	FBgn0004171	Mst98Cb
MI869	MI869-RG	chr2	chr2	-	8404036	8407930	0	0.96	0	184.645	0.01	632.03	0.05	970.125	Fun	FBgn0004171	Mst98Cb
MI870	MI870-RA	chr2	chr2	-	8451298	8544759	0.21	0.275	5.925	3.125	1.295	1.42	0	0.01	Fun	FBgn0085383	CG34354
MI870	MI870-RB	chr2	chr2	-	8452324	8544757	0.21	0.275	5.925	3.125	1.295	1.42	0	0.01	Fun	FBgn0085383	CG34354
MI871	MI871-RA	chr2	chr2	+	8559722	8589622	0	0	0	0	0	0	0	0	Sil
MI872	MI872-RA	chr2	chr2	-	8604033	8646310	0.505	0.745	23.78	11.015	2.61	2.855	0.005	0.1	Fun	FBgn0085391	trv
MI872	MI872-RB	chr2	chr2	-	8604050	8646248	0.505	0.745	23.78	11.015	2.61	2.855	0.005	0.1	Fun	FBgn0085391	trv
MI872	MI872-RC	chr2	chr2	-	8604055	8646310	0.505	0.745	23.78	11.015	2.61	2.855	0.005	0.1	Fun	FBgn0085391	trv
MI873	MI873-RA	chr2	chr2	+	8708667	8709694	0	0	0	0	0	277.65	0.1	4.895	Fun	FBgn0039568	CG4815
MI874	MI874-RA	chr2	chr2	+	8711775	8735107	46.585	48.4	50.735	31.67	65.165	41.995	6.815	6.66	Fun	FBgn0003890	betaTub97EF
MI875	MI875-RA	chr2	chr2	-	8736217	8740751	4.49	5.805	10.98	31.44	13.645	55.635	18.565	86.225	Fun	FBgn0039566	CG4849
MI876	MI876-RA	chr2	chr2	+	8740919	8742047	0.03	0	0.04	0.705	0	0.195	0	0.6	Sil	FBgn0051253	CG31253
MI877	MI877-RA	chr2	chr2	+	8742085	8744059	7.06	6.41	18.18	20.245	25.62	12.75	44.69	10.715	Fun	FBgn0259990	CG42487
MI877	MI877-RB	chr2	chr2	+	8742085	8744105	7.06	6.41	18.18	20.245	25.62	12.75	44.69	10.715	Fun	FBgn0259990	CG42487
MI878	MI878-RA	chr2	chr2	-	8744030	8746617	3.985	4.005	4.225	2.875	2.89	0.775	0	0.31	Fun	FBgn0039564	Nep7
MI879	MI879-RA	chr2	chr2	+	8746841	8750307	1.775	1.52	4.68	4.965	8.34	2.92	39.035	2.47	Dis	FBgn0039563	CG4951
MI879	MI879-RB	chr2	chr2	+	8746847	8749169	1.775	1.52	4.68	4.965	8.34	2.92	39.035	2.47	Dis	FBgn0039563	CG4951
MI880	MI880-RA	chr2	chr2	-	8749042	8752329	169.795	196.925	283.19	274.35	126.065	327.205	99.155	176.47	Fun	FBgn0039562	Gp93
MI881	MI881-RA	chr2	chr2	+	8757193	8763563	3.735	3.75	7.14	14.685	18.745	55.7	21.08	67.42	Fun	FBgn0039561	mfrn
MI882	MI882-RA	chr2	chr2	-	8763504	8767654	4.415	5.66	13.915	22.78	10.445	11.3	14.765	5.61	Fun	FBgn0039560	BOD1
MI882	MI882-RB	chr2	chr2	-	8763504	8767753	4.415	5.66	13.915	22.78	10.445	11.3	14.765	5.61	Fun	FBgn0039560	BOD1
MI882	MI882-RC	chr2	chr2	-	8763504	8767794	4.415	5.66	13.915	22.78	10.445	11.3	14.765	5.61	Fun	FBgn0039560	BOD1
MI883	MI883-RA	chr2	chr2	+	8768126	8773818	2.395	3.4	5.8	12.305	10.955	5.16	40.33	3.19	Fun	FBgn0039559	NSD
MI884	MI884-RA	chr2	chr2	-	8773359	8780190	15.26	21.235	20.445	71.74	40.94	64.74	48.08	46.07	Fun	FBgn0027579	mino
MI884	MI884-RB	chr2	chr2	-	8773397	8776745	15.26	21.235	20.445	71.74	40.94	64.74	48.08	46.07	Fun	FBgn0027579	mino
MI885	MI885-RA	chr2	chr2	+	8776663	8776912	0	0	0	0.385	0	0.91	1.87	0.695	Fun
MI886	MI886-RA	chr2	chr2	+	8777419	8778744	0.305	0.12	0.25	0.275	5.38	0.515	30.43	0.72	Fun	FBgn0051053	nenya
MI887	MI887-RA	chr2	chr2	-	8780461	8782478	1249.4	1306.78	1714.34	1437.94	1365.09	367.84	660.805	88.97	Fun	FBgn0003279	RpL4
MI888	MI888-RA	chr2	chr2	+	8782684	8783894	14.635	14.59	39.205	50.555	22.055	21.985	26.79	19.245	Fun	FBgn0039558	BCAS2
MI889	MI889-RA	chr2	chr2	-	8783658	8787424	3.8	3.31	15.83	13.1	8.685	12.305	8.11	8.615	Fun	FBgn0085433	CG34404
MI889	MI889-RB	chr2	chr2	-	8783781	8787397	3.8	3.31	15.83	13.1	8.685	12.305	8.11	8.615	Fun	FBgn0085433	CG34404
MI890	MI890-RA	chr2	chr2	-	8787605	8789301	2.24	2.085	6.445	18.805	4.235	17.655	5.225	18.745	Fun	FBgn0039860	CG1792
MI891	MI891-RA	chr2	chr2	+	8789191	8790337	3.955	5.215	10.63	11	7.72	4.53	12.325	2.845	Fun	FBgn0039859	CG11539
MI892	MI892-RA	chr2	chr2	-	8789914	8794362	4.32	4.295	21.34	27.14	8.84	18.655	15.15	14.095	Fun	FBgn0011655	Med
MI892	MI892-RB	chr2	chr2	-	8789916	8794322	4.32	4.295	21.34	27.14	8.84	18.655	15.15	14.095	Fun	FBgn0011655	Med
MI893	MI893-RA	chr2	chr2	+	8798320	8814161	163.76	177.925	335.55	274.795	171.85	87.795	147.675	34.41	Fun	FBgn0039858	CycG
MI893	MI893-RB	chr2	chr2	+	8798374	8814161	163.76	177.925	335.55	274.795	171.85	87.795	147.675	34.41	Fun	FBgn0039858	CycG
MI894	MI894-RA	chr2	chr2	-	8808741	8812850	0.065	0.08	3.91	2.1	0.1	1.71	0.105	1.69	Fun
MI894	MI894-RB	chr2	chr2	-	8808923	8809887	0.065	0.08	3.91	2.1	0.1	1.71	0.105	1.69	Fun
MI895	MI895-RA	chr2	chr2	+	8815070	8816709	1926.55	1942.01	2668.78	2440.81	1598.05	578.63	845.255	206.26	Fun	FBgn0039857	RpL6
MI895	MI895-RB	chr2	chr2	+	8815176	8816701	1926.55	1942.01	2668.78	2440.81	1598.05	578.63	845.255	206.26	Fun	FBgn0039857	RpL6
MI896	MI896-RA	chr2	chr2	-	8815559	8820702	3.3	3.655	4.995	13.645	11.64	12.745	4.745	6.355	Fun	FBgn0039854	CG1635
MI896	MI896-RB	chr2	chr2	-	8815559	8820702	3.3	3.655	4.995	13.645	11.64	12.745	4.745	6.355	Fun	FBgn0039854	CG1635
MI897	MI897-RA	chr2	chr2	+	8820471	8821814	0.03	0.3	0	24.165	0.03	46.945	0.035	89.045	Fun	FBgn0037912	sea
MI898	MI898-RA	chr2	chr2	-	8825944	8834478	1.77	2.36	4.99	20.04	1.79	10.885	7.71	8.855	Fun	FBgn0003268	rod
MI899	MI899-RA	chr2	chr2	+	8834569	8839811	2.465	2.99	7.255	12.995	6.675	4.28	25.3	2.925	Fun	FBgn0043900	pygo
MI899	MI899-RB	chr2	chr2	+	8834705	8839791	2.465	2.99	7.255	12.995	6.675	4.28	25.3	2.925	Fun	FBgn0043900	pygo
MI899	MI899-RC	chr2	chr2	+	8834719	8839817	2.465	2.99	7.255	12.995	6.675	4.28	25.3	2.925	Fun	FBgn0043900	pygo
MI900	MI900-RA	chr2	chr2	-	8840166	8843925	28.965	29.455	30.065	52.53	30.045	49.105	39.01	31.945	Fun	FBgn0028968	gammaCOP
MI900	MI900-RB	chr2	chr2	-	8840170	8845242	28.965	29.455	30.065	52.53	30.045	49.105	39.01	31.945	Fun	FBgn0028968	gammaCOP
MI901	MI901-RA	chr2	chr2	+	8846441	8857324	1.825	1.94	4.835	6.69	5.345	4.21	10.565	2.495	Fun	FBgn0039466	CG5521
MI902	MI902-RA	chr2	chr2	+	8860483	8866991	4.625	3.75	2.9	1.11	5.705	3.935	0.765	1.295	Fun	FBgn0039467	CG14253
MI902	MI902-RB	chr2	chr2	+	8860538	8865845	4.625	3.75	2.9	1.11	5.705	3.935	0.765	1.295	Fun	FBgn0039467	CG14253
MI903	MI903-RA	chr2	chr2	-	8865623	8868940	956.65	757.17	563.885	489.42	194.245	70.46	165.065	76.53	Fun	FBgn0051075	CG31075
MI903	MI903-RB	chr2	chr2	-	8865623	8868940	956.65	757.17	563.885	489.42	194.245	70.46	165.065	76.53	Fun	FBgn0051075	CG31075
MI904	MI904-RA	chr2	chr2	-	8869522	8870515	30.79	23.665	19.41	13.56	5.575	5.815	1.685	2.105	Fun	FBgn0051076	CG31076
MI905	MI905-RA	chr2	chr2	+	8875678	8877231	0.025	0	0	0	0.05	0	0	0	Sil-Dis	FBgn0039469	TwdlC
MI906	MI906-RA	chr2	chr2	+	8883594	8885222	0.05	0.05	0.025	0.025	28.965	19.275	0	0	Fun	FBgn0051077	CG31077
MI907	MI907-RA	chr2	chr2	-	8885680	8887967	439.865	303.73	1.95	0.29	173.34	94.555	0.04	0.15	Fun	FBgn0039470	CG6296
MI907	MI907-RB	chr2	chr2	-	8885680	8887967	439.865	303.73	1.95	0.29	173.34	94.555	0.04	0.15	Fun	FBgn0039470	CG6296
MI907	MI907-RC	chr2	chr2	-	8885680	8888008	439.865	303.73	1.95	0.29	173.34	94.555	0.04	0.15	Fun	FBgn0039470	CG6296
MI907	MI907-RD	chr2	chr2	-	8885680	8889581	439.865	303.73	1.95	0.29	173.34	94.555	0.04	0.15	Fun	FBgn0039470	CG6296
MI908	MI908-RA	chr2	chr2	+	8889880	8891146	0.03	0	0.33	1.895	0.03	2.095	0	1.915	Fun
MI909	MI909-RA	chr2	chr2	-	8889989	8891143	2122.73	1785.82	7.21	1.34	196.915	103.395	0.085	0.665	Fun	FBgn0039475	CG6277
MI909	MI909-RB	chr2	chr2	-	8889990	8897797	2122.73	1785.82	7.21	1.34	196.915	103.395	0.085	0.665	Fun	FBgn0039475	CG6277
MI909	MI909-RC	chr2	chr2	-	8891794	8893021	2122.73	1785.82	7.21	1.34	196.915	103.395	0.085	0.665	Fun	FBgn0039475	CG6277
MI909	MI909-RD	chr2	chr2	-	8896632	8900053	2122.73	1785.82	7.21	1.34	196.915	103.395	0.085	0.665	Fun	FBgn0039475	CG6277
MI909	MI909-RE	chr2	chr2	-	8898885	8903756	2122.73	1785.82	7.21	1.34	196.915	103.395	0.085	0.665	Fun	FBgn0039475	CG6277
MI909	MI909-RF	chr2	chr2	-	8902592	8907489	2122.73	1785.82	7.21	1.34	196.915	103.395	0.085	0.665	Fun	FBgn0039475	CG6277
MI909	MI909-RG	chr2	chr2	-	8902592	8907489	2122.73	1785.82	7.21	1.34	196.915	103.395	0.085	0.665	Fun	FBgn0039475	CG6277
MI909	MI909-RH	chr2	chr2	-	8902592	8907489	2122.73	1785.82	7.21	1.34	196.915	103.395	0.085	0.665	Fun	FBgn0039475	CG6277
MI909	MI909-RI	chr2	chr2	-	8902592	8907489	2122.73	1785.82	7.21	1.34	196.915	103.395	0.085	0.665	Fun	FBgn0039475	CG6277
MI909	MI909-RJ	chr2	chr2	-	8902592	8907489	2122.73	1785.82	7.21	1.34	196.915	103.395	0.085	0.665	Fun	FBgn0039475	CG6277
MI909	MI909-RK	chr2	chr2	-	8902592	8907489	2122.73	1785.82	7.21	1.34	196.915	103.395	0.085	0.665	Fun	FBgn0039475	CG6277
MI910	MI910-RA	chr2	chr2	+	8907868	8913700	0.065	0	0.27	0.24	1.24	1.27	0	0.07	Fun	FBgn0004842	RYa-R
MI911	MI911-RA	chr2	chr2	+	8930445	8932410	0.615	0.105	7.25	2.205	0.26	0.615	0	0.405	Fun	FBgn0029170	TwdlT
MI911	MI911-RB	chr2	chr2	+	8930445	8932410	0.615	0.105	7.25	2.205	0.26	0.615	0	0.405	Fun	FBgn0029170	TwdlT
MI912	MI912-RA	chr2	chr2	+	8939539	8940867	0.11	0.195	0.135	0.17	1.19	1.245	0.09	0.085	Fun	FBgn0004842	RYa-R
MI913	MI913-RA	chr2	chr2	+	8944692	8945659	0	0	0.05	23.495	0	193.75	0	526.77	Fun	FBgn0085321	CG34292
MI913	MI913-RB	chr2	chr2	+	8944692	8945659	0	0	0.05	23.495	0	193.75	0	526.77	Fun	FBgn0085321	CG34292
MI914	MI914-RA	chr2	chr2	-	8947451	8952546	3.615	4.45	4.155	8.4	16.71	4.455	26.355	1.11	Fun	FBgn0003495	spz
MI914	MI914-RB	chr2	chr2	-	8947451	8952548	3.615	4.45	4.155	8.4	16.71	4.455	26.355	1.11	Fun	FBgn0003495	spz
MI914	MI914-RC	chr2	chr2	-	8947451	8952548	3.615	4.45	4.155	8.4	16.71	4.455	26.355	1.11	Fun	FBgn0003495	spz
MI914	MI914-RD	chr2	chr2	-	8947451	8952548	3.615	4.45	4.155	8.4	16.71	4.455	26.355	1.11	Fun	FBgn0003495	spz
MI914	MI914-RE	chr2	chr2	-	8947451	8952548	3.615	4.45	4.155	8.4	16.71	4.455	26.355	1.11	Fun	FBgn0003495	spz
MI914	MI914-RF	chr2	chr2	-	8947454	8952524	3.615	4.45	4.155	8.4	16.71	4.455	26.355	1.11	Fun	FBgn0003495	spz
MI914	MI914-RG	chr2	chr2	-	8947454	8952548	3.615	4.45	4.155	8.4	16.71	4.455	26.355	1.11	Fun	FBgn0003495	spz
MI915	MI915-RA	chr2	chr2	+	8947868	8948359	0	0	0	31.705	0	181.475	0	1461.54	Dis	FBgn0264563	CG43935
MI916	MI916-RA	chr2	chr2	+	8958188	8965487	0.525	0.82	2.685	0.92	0.2	0.17	0.025	0	Fun	FBgn0039479	CG14257
MI917	MI917-RA	chr2	chr2	+	8963511	8964998	0	0	0.555	1.025	0.075	3.805	0.03	3.52	Fun	FBgn0039479	CG14257
MI918	MI918-RA	chr2	chr2	-	8966157	8969753	3.49	3	4.185	31.245	7.475	4.08	0.185	0.845	Fun	FBgn0039480	Cpr97Ea
MI919	MI919-RA	chr2	chr2	-	8972533	8974020	3.88	3.14	9.45	52.34	46.38	22.275	1.985	4.41	Fun	FBgn0039481	Cpr97Eb
MI920	MI920-RA	chr2	chr2	+	8975679	8976915	251.67	160.81	0.085	0	0.26	0.145	0	0.04	Fun	FBgn0039482	CG14258
MI921	MI921-RA	chr2	chr2	+	8977054	8978542	1.1	1.03	0	0	19.48	13.085	0	0.065	Fun	FBgn0039483	CG14259
MI922	MI922-RA	chr2	chr2	-	8978307	8983085	8.36	5.085	1.35	0.825	1.84	0.535	0.35	0.37	Fun	FBgn0243514	eater
MI922	MI922-RB	chr2	chr2	-	8978359	8983085	8.36	5.085	1.35	0.825	1.84	0.535	0.35	0.37	Fun	FBgn0243514	eater
MI922	MI922-RC	chr2	chr2	-	8978359	8983085	8.36	5.085	1.35	0.825	1.84	0.535	0.35	0.37	Fun	FBgn0243514	eater
MI923	MI923-RA	chr2	chr2	+	8984557	8986002	2.43	1.47	0.685	0.66	28.295	25.84	0.055	0.415	Fun	FBgn0039485	CG17189
MI924	MI924-RA	chr2	chr2	-	8985891	8990321	15.455	20.105	0.875	0.735	26.2	25.135	3.75	0.26	Fun	FBgn0039486	CAH9
MI925	MI925-RA	chr2	chr2	-	8991286	8996462	9.265	10.49	19.85	24.28	13.23	5.685	55.685	7.5	Fun	FBgn0039487	gb
MI926	MI926-RA	chr2	chr2	+	8996603	8998537	4.44	4.65	7.625	10.48	7.26	7.7	31.415	11.41	Fun	FBgn0039489	CG5880
MI927	MI927-RA	chr2	chr2	-	9001565	9004685	0	0.09	0.015	49.52	0.01	131.1	0	120.45	Fun	FBgn0039491	CG6059
MI927	MI927-RB	chr2	chr2	-	9001565	9004687	0	0.09	0.015	49.52	0.01	131.1	0	120.45	Fun	FBgn0039491	CG6059
MI927	MI927-RC	chr2	chr2	-	9001565	9004687	0	0.09	0.015	49.52	0.01	131.1	0	120.45	Fun	FBgn0039491	CG6059
MI928	MI928-RA	chr2	chr2	-	9005311	9030341	7.78	6.785	9.785	23.525	16.155	30.875	14.69	24.99	Fun	FBgn0039492	CG6051
MI928	MI928-RB	chr2	chr2	-	9005311	9030341	7.78	6.785	9.785	23.525	16.155	30.875	14.69	24.99	Fun	FBgn0039492	CG6051
MI928	MI928-RC	chr2	chr2	-	9005311	9030341	7.78	6.785	9.785	23.525	16.155	30.875	14.69	24.99	Fun	FBgn0039492	CG6051
MI928	MI928-RD	chr2	chr2	-	9005321	9030228	7.78	6.785	9.785	23.525	16.155	30.875	14.69	24.99	Fun	FBgn0039492	CG6051
MI928	MI928-RE	chr2	chr2	-	9005326	9030136	7.78	6.785	9.785	23.525	16.155	30.875	14.69	24.99	Fun	FBgn0039492	CG6051
MI928	MI928-RF	chr2	chr2	-	9005326	9030136	7.78	6.785	9.785	23.525	16.155	30.875	14.69	24.99	Fun	FBgn0039492	CG6051
MI928	MI928-RG	chr2	chr2	-	9005357	9030242	7.78	6.785	9.785	23.525	16.155	30.875	14.69	24.99	Fun	FBgn0039492	CG6051
MI928	MI928-RH	chr2	chr2	-	9006218	9030228	7.78	6.785	9.785	23.525	16.155	30.875	14.69	24.99	Fun	FBgn0039492	CG6051
MI928	MI928-RI	chr2	chr2	-	9006218	9030228	7.78	6.785	9.785	23.525	16.155	30.875	14.69	24.99	Fun	FBgn0039492	CG6051
MI929	MI929-RA	chr2	chr2	-	9030545	9031852	3.775	4.285	12.28	14.28	7.965	5.53	9.58	6.665	Fun	FBgn0035159	CG13896
MI930	MI930-RA	chr2	chr2	+	9032168	9038761	27.945	43.515	2.675	11.16	90.41	74.545	21.04	4.775	Fun	FBgn0029155	Men-b
MI930	MI930-RB	chr2	chr2	+	9032363	9038761	27.945	43.515	2.675	11.16	90.41	74.545	21.04	4.775	Fun	FBgn0029155	Men-b
MI930	MI930-RC	chr2	chr2	+	9032363	9038761	27.945	43.515	2.675	11.16	90.41	74.545	21.04	4.775	Fun	FBgn0029155	Men-b
MI931	MI931-RA	chr2	chr2	+	9039244	9041043	52.67	46.785	74.335	49.41	15.255	8.64	0.375	0.52	Fun	FBgn0039494	grass
MI931	MI931-RB	chr2	chr2	+	9039335	9041010	52.67	46.785	74.335	49.41	15.255	8.64	0.375	0.52	Fun	FBgn0039494	grass
MI932	MI932-RA	chr2	chr2	+	9042454	9044132	1.18	1.375	2.07	2.47	5.67	1.79	0.06	0.035	Fun	FBgn0039495	CG5909
MI933	MI933-RA	chr2	chr2	-	9046964	9047527	21.205	20.265	22.14	20.54	44.63	23.425	64.54	16.86	Fun	FBgn0085322	CG34293
MI934	MI934-RA	chr2	chr2	+	9047830	9049039	0.405	0.135	0.42	2.455	2.97	0.92	13.78	1.15	Fun	FBgn0003482	spn-D
MI935	MI935-RA	chr2	chr2	-	9053512	9074594	1.855	1.66	14.605	7.42	0.35	0.275	0	0.02	Fun	FBgn0004197	Ser
MI935	MI935-RB	chr2	chr2	-	9053512	9074594	1.855	1.66	14.605	7.42	0.35	0.275	0	0.02	Fun	FBgn0004197	Ser
MI936	MI936-RA	chr2	chr2	-	9112382	9114661	21.485	20.115	12.33	26.69	29.91	95.635	25.285	312.875	Fun	FBgn0261995	CG42813
MI936	MI936-RB	chr2	chr2	-	9112383	9114661	21.485	20.115	12.33	26.69	29.91	95.635	25.285	312.875	Fun	FBgn0261995	CG42813
MI937	MI937-RA	chr2	chr2	+	9114197	9117568	104.595	131.675	75.295	99.34	330.12	308.445	72.335	167.545	Fun	FBgn0039635	Pdhb
MI937	MI937-RB	chr2	chr2	+	9114199	9117544	104.595	131.675	75.295	99.34	330.12	308.445	72.335	167.545	Fun	FBgn0039635	Pdhb
MI937	MI937-RC	chr2	chr2	+	9114705	9116393	104.595	131.675	75.295	99.34	330.12	308.445	72.335	167.545	Fun	FBgn0039635	Pdhb
MI938	MI938-RA	chr2	chr2	+	9117718	9120234	8.32	8.2	17.39	20.47	14.49	19.875	36.535	23.12	Fun	FBgn0039636	Atg14
MI939	MI939-RA	chr2	chr2	-	9120024	9125161	1.78	2.015	5.605	10.805	7.205	4.94	17.755	3.505	Fun	FBgn0005596	yem
MI940	MI940-RA	chr2	chr2	+	9123467	9133308	10.84	9.43	32.375	45.1	16.08	10.81	20.12	12.72	Fun	FBgn0039637	Ctl2
MI941	MI941-RA	chr2	chr2	-	9127036	9131338	0.97	0.815	1.895	3.52	1.985	1.03	1.12	0.695	Dis
MI942	MI942-RA	chr2	chr2	-	9131675	9134730	1.505	2.52	6.63	34.26	4.525	31.185	25.525	56.825	Fun	FBgn0039638	dgt6
MI942	MI942-RB	chr2	chr2	-	9131675	9134730	1.505	2.52	6.63	34.26	4.525	31.185	25.525	56.825	Fun	FBgn0039638	dgt6
MI942	MI942-RC	chr2	chr2	-	9131675	9134882	1.505	2.52	6.63	34.26	4.525	31.185	25.525	56.825	Fun	FBgn0039638	dgt6
MI942	MI942-RD	chr2	chr2	-	9131675	9134905	1.505	2.52	6.63	34.26	4.525	31.185	25.525	56.825	Fun	FBgn0039638	dgt6
MI943	MI943-RA	chr2	chr2	+	9134957	9141962	24.26	26.295	30.08	33.865	32.615	28.69	25.765	11.885	Fun	FBgn0028671	Vha100-1
MI943	MI943-RB	chr2	chr2	+	9134957	9141962	24.26	26.295	30.08	33.865	32.615	28.69	25.765	11.885	Fun	FBgn0028671	Vha100-1
MI943	MI943-RC	chr2	chr2	+	9134995	9141960	24.26	26.295	30.08	33.865	32.615	28.69	25.765	11.885	Fun	FBgn0028671	Vha100-1
MI943	MI943-RD	chr2	chr2	+	9134995	9141960	24.26	26.295	30.08	33.865	32.615	28.69	25.765	11.885	Fun	FBgn0028671	Vha100-1
MI943	MI943-RE	chr2	chr2	+	9135011	9141960	24.26	26.295	30.08	33.865	32.615	28.69	25.765	11.885	Fun	FBgn0028671	Vha100-1
MI943	MI943-RF	chr2	chr2	+	9135259	9141960	24.26	26.295	30.08	33.865	32.615	28.69	25.765	11.885	Fun	FBgn0028671	Vha100-1
MI943	MI943-RG	chr2	chr2	+	9135259	9141960	24.26	26.295	30.08	33.865	32.615	28.69	25.765	11.885	Fun	FBgn0028671	Vha100-1
MI944	MI944-RA	chr2	chr2	-	9141751	9142784	3.295	2.735	9.17	6.24	7.97	4.195	36.425	4.5	Fun	FBgn0039639	Alg13
MI945	MI945-RA	chr2	chr2	+	9142691	9149881	3.23	2.415	1.93	3.3	45.87	2.085	110.375	0.49	Fun	FBgn0039640	superdeath
MI945	MI945-RB	chr2	chr2	+	9142691	9149992	3.23	2.415	1.93	3.3	45.87	2.085	110.375	0.49	Fun	FBgn0039640	superdeath
MI946	MI946-RA	chr2	chr2	-	9149582	9151334	3.15	3.445	22.3	18.89	4.06	1.465	3.135	0.285	Fun	FBgn0039641	CG14511
MI947	MI947-RA	chr2	chr2	-	9151695	9153717	6.35	6.01	70.715	70.56	9.13	30.42	25.25	34.315	Fun	FBgn0039642	CG11882
MI947	MI947-RB	chr2	chr2	-	9151698	9152891	6.35	6.01	70.715	70.56	9.13	30.42	25.25	34.315	Fun	FBgn0039642	CG11882
MI948	MI948-RA	chr2	chr2	+	9153000	9154225	511.81	735.465	140.97	115.37	1036.11	716.94	69.635	18.85	Fun	FBgn0014869	Pglym78
MI949	MI949-RA	chr2	chr2	-	9154116	9157602	6.2	8.53	11.31	31.455	18.115	20.89	79.355	30.965	Fun	FBgn0041588	eIF2D
MI950	MI950-RA	chr2	chr2	-	9160595	9161524	0	0	0	13.09	0	79.19	0	494.98	Fun
MI951	MI951-RA	chr2	chr2	-	9162162	9177107	3.68	1.78	22.685	13.15	1.225	0.695	0.03	1.15	Fun	FBgn0004644	hh
MI952	MI952-RA	chr2	chr2	-	9186062	9194620	2.695	2.47	8.585	8.03	3.86	3.255	9.625	2.615	Fun	FBgn0004395	unk
MI952	MI952-RB	chr2	chr2	-	9186062	9194620	2.695	2.47	8.585	8.03	3.86	3.255	9.625	2.615	Fun	FBgn0004395	unk
MI952	MI952-RC	chr2	chr2	-	9186064	9194620	2.695	2.47	8.585	8.03	3.86	3.255	9.625	2.615	Fun	FBgn0004395	unk
MI953	MI953-RA	chr2	chr2	+	9195729	9199389	4.375	5.69	10.305	12.1	8.63	2.51	11.92	1.485	Fun	FBgn0039508	CG3368
MI954	MI954-RA	chr2	chr2	-	9199294	9200513	35.48	28.935	45.755	79.085	31.08	32.655	23.875	19	Fun	FBgn0039509	bigmax
MI955	MI955-RA	chr2	chr2	+	9200791	9203339	72.425	70.7	114.8	81.44	59.225	35.865	39.165	12.55	Fun	FBgn0015737	Hmu
MI956	MI956-RA	chr2	chr2	-	9203256	9204030	326.73	175.17	42.955	19.565	54.63	20.315	98.755	2.195	Fun	FBgn0040609	CG3348
MI956	MI956-RB	chr2	chr2	-	9203260	9203976	326.73	175.17	42.955	19.565	54.63	20.315	98.755	2.195	Fun	FBgn0040609	CG3348
MI957	MI957-RA	chr2	chr2	-	9233939	9255691	0	0.04	0.01	22.535	0	52.105	0	73.345	Fun	FBgn0267433	kl-5
MI957	MI957-RB	chr2	chr2	-	9233939	9255691	0	0.04	0.01	22.535	0	52.105	0	73.345	Fun	FBgn0267433	kl-5
MI958	MI958-RA	chr2	chr2	+	9260117	9289806	0.03	0.11	0.075	0.255	0.28	0.215	0.055	0.065	Sil	FBgn0260487	CG42534
MI959	MI959-RA	chr2	chr2	-	9293039	9357261	0.205	0.23	4.11	2.695	1.34	1.385	0.03	0.11	Fun	FBgn0016061	side
MI960	MI960-RA	chr2	chr2	+	9386207	9389218	0	0.02	0	27.46	0	36.37	0	36.78	Fun	FBgn0039010	CG4907
MI961	MI961-RA	chr2	chr2	+	9393983	9395738	0	0.02	0	7.56	0	4.875	0	3.995	Fun	FBgn0033963	CG12857
MI962	MI962-RA	chr2	chr2	+	9397287	9410581	0	0	0	0	0	0	0	0	Sil	FBgn0039520	Gr98a
MI963	MI963-RA	chr2	chr2	-	9421359	9423405	110.285	169.61	0.57	0.4	0.08	0.15	0	0.195	Fun
MI963	MI963-RB	chr2	chr2	-	9421915	9422427	110.285	169.61	0.57	0.4	0.08	0.15	0	0.195	Fun
MI963	MI963-RC	chr2	chr2	-	9421915	9423405	110.285	169.61	0.57	0.4	0.08	0.15	0	0.195	Fun
MI963	MI963-RD	chr2	chr2	-	9421917	9423404	110.285	169.61	0.57	0.4	0.08	0.15	0	0.195	Fun
MI964	MI964-RA	chr2	chr2	-	9436529	9437904	0	0	0.475	0.28	0	0.03	0	0	Sil	FBgn0039522	CG13972
MI965	MI965-RA	chr2	chr2	+	9442205	9445014	0.06	0.04	1.22	0.92	0.225	0.33	0	0.13	Dis	FBgn0039523	CG12885
MI966	MI966-RA	chr2	chr2	-	9454956	9466536	7.83	6.885	19.72	13.255	15.69	8.82	14.59	2.52	Fun	FBgn0004387	Klp98A
MI966	MI966-RB	chr2	chr2	-	9454963	9466530	7.83	6.885	19.72	13.255	15.69	8.82	14.59	2.52	Fun	FBgn0004387	Klp98A
MI967	MI967-RA	chr2	chr2	-	9468057	9469646	0.035	0.075	0.31	0.03	8.385	6.815	0.365	0	Fun	FBgn0039525	CG5646
MI968	MI968-RA	chr2	chr2	-	9470176	9497277	43.11	36.805	82.64	52.945	45.445	27.045	26.445	7.545	Fun	FBgn0027492	wdb
MI968	MI968-RB	chr2	chr2	-	9470176	9497277	43.11	36.805	82.64	52.945	45.445	27.045	26.445	7.545	Fun	FBgn0027492	wdb
MI968	MI968-RC	chr2	chr2	-	9470176	9497277	43.11	36.805	82.64	52.945	45.445	27.045	26.445	7.545	Fun	FBgn0027492	wdb
MI969	MI969-RA	chr2	chr2	+	9492590	9496157	6.13	7.085	8.715	19.675	21.025	13.295	20.235	8.505	Fun	FBgn0010926	l(3)07882
MI969	MI969-RB	chr2	chr2	+	9492590	9496168	6.13	7.085	8.715	19.675	21.025	13.295	20.235	8.505	Fun	FBgn0010926	l(3)07882
MI968	MI968-RD	chr2	chr2	-	9495883	9497277	43.11	36.805	82.64	52.945	45.445	27.045	26.445	7.545	Fun	FBgn0027492	wdb
MI970	MI970-RA	chr2	chr2	+	9498096	9498975	4.64	4.83	17.345	26.765	24.48	12.76	309.625	44.52	Fun	FBgn0035955	CG5194
MI971	MI971-RA	chr2	chr2	+	9500117	9502309	6.11	6.9	15.76	51.225	18.68	76.365	29.04	114.22	Fun	FBgn0038515	CG5823
MI971	MI971-RB	chr2	chr2	+	9500238	9502309	6.11	6.9	15.76	51.225	18.68	76.365	29.04	114.22	Fun	FBgn0038515	CG5823
MI971	MI971-RC	chr2	chr2	+	9500238	9502309	6.11	6.9	15.76	51.225	18.68	76.365	29.04	114.22	Fun	FBgn0038515	CG5823
MI972	MI972-RA	chr2	chr2	-	9508720	9510679	0	0.02	0.02	9.085	0	30.535	0.02	48.18	Fun
MI973	MI973-RA	chr2	chr2	+	9511828	9512255	0	0	0	1.475	0	2.765	0	10.905	Fun
MI974	MI974-RA	chr2	chr2	+	9528367	9549611	0.09	0.095	2.465	1.81	0.555	0.645	0.025	0.1	Dis	FBgn0261046	Dscam3
MI975	MI975-RA	chr2	chr2	+	9564689	9565159	0	0	0	8.29	0	43.4	0	111.785	Fun	FBgn0038512	CG14330
MI976	MI976-RA	chr2	chr2	+	9572917	9573438	0	0	0	0.22	0	0.45	0.115	0.45	Sil-Dis
MI977	MI977-RA	chr2	chr2	+	9576736	9579560	0	0	0	0.575	0	4.14	0	2.115	Dis
MI978	MI978-RA	chr2	chr2	+	9586622	9588871	0.89	1.505	4.2	2.505	0.28	0.245	0	0	Fun	FBgn0000564	Eh
MI979	MI979-RA	chr2	chr2	-	9589400	9611851	0.55	0.525	2.16	2.355	1.66	0.8	0.095	0.13	Fun	FBgn0038511	cysu
MI980	MI980-RA	chr2	chr2	+	9601309	9601716	0	0	68.14	189.01	0	0	0	0.46	Fun	FBgn0264899	CG44090
MI981	MI981-RA	chr2	chr2	+	9602880	9603552	3.68	0.69	6.73	29.035	0	1.1	0	1.14	Fun	FBgn0264899	CG44090
MI982	MI982-RA	chr2	chr2	-	9615772	9616374	61.515	3.7	0.175	0.08	0	0.075	0	0.2	Fun
MI983	MI983-RA	chr2	chr2	+	9617427	9618074	33.595	1.665	0	0.135	0	0	0	0	Fun
MI984	MI984-RA	chr2	chr2	+	9618748	9621423	0	0.185	0	14.035	0	10.37	0	10.06	Fun	FBgn0052246	CG32246
MI985	MI985-RA	chr2	chr2	-	9620959	9621835	190.53	63.385	0	0.35	0	0	0.12	0	Fun	FBgn0038508	CG5866
MI986	MI986-RA	chr2	chr2	-	9622172	9623106	0.77	1.05	0	0	2.025	2.29	36.655	0.19	Fun	FBgn0038631	CG7695
MI987	MI987-RA	chr2	chr2	-	9623608	9624291	1.2	1.875	0.38	0.245	0	0	7.925	0	Fun	FBgn0262004	CG42822
[truncated: 42,712 more rows]

## Sheet: b. D. pseudoobscura
Table S7b. Chromosomal location, expression level, and functionality of transcripts in Drosophila pseudoobscura
Gene	Transcript	Scaffold	Chromosome	Strand	Start	End	LF_FPKM1	LM_FPKM	PF_FPKM	PM_FPKM	WF_FPKM	WM_FPKM	O_FPKM	Te_FPKM	Functionality2	Best homolog in Dmel3	Common gene name4
PS1	PS1-RA	2	2	-	1175	7209	0.075	0.49	0.075	0.885	6.93	3.01	15.22	10.29	Fun	FBgn0038803	CG5191
PS2	PS2-RA	2	2	+	4538	6578	21.825	17.41	5.72	7.38	2.89	6.29	1.1	7.85	Fun	FBgn0038804	CG10877
PS3	PS3-RA	2	2	+	7100	9124	5.745	10.255	8.065	21.475	28.805	34.775	38.055	101.005	Fun	FBgn0040575	CG15922
PS4	PS4-RA	2	2	-	7587	9407	4.86	8.525	13.5	13.74	35.185	7.6	74.735	13.75	Fun	FBgn0043457	CG5180
PS4	PS4-RB	2	2	-	7604	9287	4.86	8.525	13.5	13.74	35.185	7.6	74.735	13.75	Fun	FBgn0043457	CG5180
PS5	PS5-RA	2	2	+	9496	13462	1.02	9.335	2.515	49.43	11.8	71.525	14.095	76.64	Fun	FBgn0036892	Lon
PS6	PS6-RA	2	2	+	13600	18387	5.35	7.015	6.36	6.01	21.5	15.115	39.01	5.41	Fun	FBgn0067783	DPCoAC
PS7	PS7-RA	2	2	+	18639	19429	23.835	32.62	30.98	38.64	116.91	22.2	227.415	32.375	Fun	FBgn0039233	CG7006
PS8	PS8-RA	2	2	+	19492	23396	5.78	9.33	21.24	19.805	15.75	10.83	19.155	7.235	Dis	FBgn0039234	Nct
PS9	PS9-RA	2	2	-	22354	24608	1.495	1.85	2.285	4.1	4.47	16.39	4.665	28.975	Fun	FBgn0051119	HDAC11
PS9	PS9-RB	2	2	-	22354	25930	1.495	1.85	2.285	4.1	4.47	16.39	4.665	28.975	Fun	FBgn0051119	HDAC11
PS9	PS9-RC	2	2	-	22378	25930	1.495	1.85	2.285	4.1	4.47	16.39	4.665	28.975	Fun	FBgn0051119	HDAC11
PS10	PS10-RA	2	2	-	28407	29330	0	20.19	13.42	13.27	0.775	2.045	0	0	Fun	FBgn0265266	CG13639
PS11	PS11-RA	2	2	-	30632	31179	0.36	1.15	79.215	100.205	0.095	0	0	0	Fun	FBgn0039237	CG13640
PS12	PS12-RA	2	2	+	31714	33649	11.34	25.06	5.94	4.025	2.345	3.455	0.02	0.08	Fun
PS13	PS13-RA	2	2	-	33117	34112	111.675	124.61	173.475	153.22	9.365	6.165	0.175	0.925	Fun
PS14	PS14-RA	2	2	+	34233	35470	232.95	218.69	75	64.46	14.13	8.89	0.185	0.95	Fun	FBgn0013949	Elal
PS15	PS15-RA	2	2	-	36135	39450	4.545	8.85	9.075	25.13	81.925	20.085	122.39	17.75	Fun	FBgn0015625	CycB3
PS16	PS16-RA	2	2	-	40023	45105	4.525	6.615	5.64	9.405	6.485	25.53	6.425	29.39	Fun	FBgn0260935	Vps15
PS17	PS17-RA	2	2	+	45154	49827	1.97	4.435	21.54	15.09	11.295	21.285	13.805	32.99	Fun	FBgn0037664	CG8420
PS17	PS17-RB	2	2	+	45154	49827	1.97	4.435	21.54	15.09	11.295	21.285	13.805	32.99	Fun	FBgn0037664	CG8420
PS17	PS17-RC	2	2	+	45154	49828	1.97	4.435	21.54	15.09	11.295	21.285	13.805	32.99	Fun	FBgn0037664	CG8420
PS17	PS17-RD	2	2	+	45154	49828	1.97	4.435	21.54	15.09	11.295	21.285	13.805	32.99	Fun	FBgn0037664	CG8420
PS17	PS17-RE	2	2	+	45567	49883	1.97	4.435	21.54	15.09	11.295	21.285	13.805	32.99	Fun	FBgn0037664	CG8420
PS18	PS18-RA	2	2	+	50079	54201	0	0.085	17.445	10.35	0.18	0.685	0.035	0.08	Fun	FBgn0037665	St2
PS19	PS19-RA	2	2	-	51119	56017	10.375	17.75	26.655	38.98	93.41	56.235	184.27	172.75	Fun	FBgn0016034	mael
PS19	PS19-RB	2	2	-	51156	55993	10.375	17.75	26.655	38.98	93.41	56.235	184.27	172.75	Fun	FBgn0016034	mael
PS20	PS20-RA	2	2	+	51730	53579	2.69	4.915	7.225	10.065	17.195	5.24	9.39	5.995	Fun	FBgn0037667	CG16734
PS20	PS20-RB	2	2	+	51730	58343	2.69	4.915	7.225	10.065	17.195	5.24	9.39	5.995	Fun	FBgn0037667	CG16734
PS20	PS20-RC	2	2	+	51730	58343	2.69	4.915	7.225	10.065	17.195	5.24	9.39	5.995	Fun	FBgn0037667	CG16734
PS19	PS19-RC	2	2	-	51887	53839	10.375	17.75	26.655	38.98	93.41	56.235	184.27	172.75	Fun	FBgn0016034	mael
PS19	PS19-RD	2	2	-	51887	58405	10.375	17.75	26.655	38.98	93.41	56.235	184.27	172.75	Fun	FBgn0016034	mael
PS19	PS19-RE	2	2	-	51887	61510	10.375	17.75	26.655	38.98	93.41	56.235	184.27	172.75	Fun	FBgn0016034	mael
PS20	PS20-RD	2	2	+	55532	58343	2.69	4.915	7.225	10.065	17.195	5.24	9.39	5.995	Fun	FBgn0037667	CG16734
PS19	PS19-RF	2	2	-	56466	61510	10.375	17.75	26.655	38.98	93.41	56.235	184.27	172.75	Fun	FBgn0016034	mael
PS19	PS19-RG	2	2	-	59307	61510	10.375	17.75	26.655	38.98	93.41	56.235	184.27	172.75	Fun	FBgn0016034	mael
PS21	PS21-RA	2	2	+	61243	62379	23.2	29.42	44.63	40.13	82.26	17.26	91.38	10.79	Fun	FBgn0037670	Ibf1
PS22	PS22-RA	2	2	+	62412	64253	191.605	201.555	64.96	79.4	187.945	128.015	169.96	58.595	Fun	FBgn0037671	ATP6AP2
PS23	PS23-RA	2	2	-	64089	66053	8.165	12.585	0.245	0.57	0.145	3.385	0.04	5.5	Fun	FBgn0037672	sage
PS24	PS24-RA	2	2	-	66765	68831	28.01	38.065	24.1	26.4	56.37	19.935	52.67	10.85	Fun	FBgn0010803	TrpRS
PS24	PS24-RB	2	2	-	66783	68831	28.01	38.065	24.1	26.4	56.37	19.935	52.67	10.85	Fun	FBgn0010803	TrpRS
PS25	PS25-RA	2	2	+	68838	72967	6.035	8.42	12.36	14.415	18.215	11.195	18.615	9.33	Fun	FBgn0285911	Vps16A
PS26	PS26-RA	2	2	-	73889	84671	14.9	20.34	33.55	30.885	43.63	13.455	47.28	7.895	Dis	FBgn0039831	CG12054
PS26	PS26-RB	2	2	-	73899	84578	14.9	20.34	33.55	30.885	43.63	13.455	47.28	7.895	Dis	FBgn0039831	CG12054
PS27	PS27-RA	2	2	+	84204	88745	999.475	852.34	648.57	541.69	1484.46	2623.45	925.195	77.87	Fun	FBgn0039830	ATPsynC
PS27	PS27-RB	2	2	+	84204	88745	999.475	852.34	648.57	541.69	1484.46	2623.45	925.195	77.87	Fun	FBgn0039830	ATPsynC
PS27	PS27-RC	2	2	+	84599	88744	999.475	852.34	648.57	541.69	1484.46	2623.45	925.195	77.87	Fun	FBgn0039830	ATPsynC
PS27	PS27-RD	2	2	+	84599	88744	999.475	852.34	648.57	541.69	1484.46	2623.45	925.195	77.87	Fun	FBgn0039830	ATPsynC
PS27	PS27-RE	2	2	+	84618	88741	999.475	852.34	648.57	541.69	1484.46	2623.45	925.195	77.87	Fun	FBgn0039830	ATPsynC
PS28	PS28-RA	2	2	+	89383	90536	5.585	7.205	9.295	11.195	55.94	6.135	41.035	2.48	Fun	FBgn0039829	CG15561
PS29	PS29-RA	2	2	-	90419	91714	16.195	18.27	16.51	18.255	90.84	14.37	81.115	7.095	Fun	FBgn0039828	CG1542
PS30	PS30-RA	2	2	+	91766	94175	3.005	6.87	5.195	16.955	19.35	16.1	22.025	21.74	Fun	FBgn0061476	Zwilch
PS31	PS31-RA	2	2	+	94537	100608	0.19	0.275	4.81	5.01	17.055	47.24	0.13	0.125	Fun	FBgn0267435	chp
PS32	PS32-RA	2	2	-	101227	108338	4.03	3.04	7.295	4.765	1.06	1.475	0.565	0.255	Fun	FBgn0039827	CG1544
PS33	PS33-RA	2	2	+	109608	127781	26.04	22.005	5.275	3.15	6.045	6.07	0.255	0.22	Fun	FBgn0051004	mesh
PS34	PS34-RA	2	2	+	135025	150042	0.305	1.705	0.89	4.075	2.375	17.46	0.065	14.3	Dis	FBgn0086704	stops
PS34	PS34-RB	2	2	+	139172	150004	0.305	1.705	0.89	4.075	2.375	17.46	0.065	14.3	Dis	FBgn0086704	stops
PS34	PS34-RC	2	2	+	149105	150006	0.305	1.705	0.89	4.075	2.375	17.46	0.065	14.3	Dis	FBgn0086704	stops
PS35	PS35-RA	2	2	-	150694	179555	0.155	0.24	0.805	0.535	0.37	2.05	0	0.535	Fun	FBgn0013973	Gycbeta100B
PS36	PS36-RA	2	2	+	185734	188293	1.555	1.87	7.29	4.925	0.64	1.16	0.235	0.03	Fun	FBgn0039821	CG15556
PS37	PS37-RA	2	2	-	188719	190066	0.37	0.185	0.045	0.48	0.185	2.845	0.03	5.915	Fun	FBgn0039820	CG15554
PS38	PS38-RA	2	2	-	197282	200274	4.52	4.53	0.51	0.585	5.94	0.765	1.01	0	Dis	FBgn0039818	CG11318
PS39	PS39-RA	2	2	+	215141	217540	0.155	0.245	0.015	0	0.695	1.86	0	0.02	Fun	FBgn0039817	CG15553
PS40	PS40-RA	2	2	+	219283	224875	0.655	0.885	6.705	5.635	1.04	4.59	0	0	Fun	FBgn0039816	CG11317
PS41	PS41-RA	2	2	+	228176	231139	0.015	0.015	0.185	0.15	0	898.37	0	11.56	Fun	FBgn0033115	Spn42De
PS42	PS42-RA	2	2	-	231128	233128	0.025	0	0	0	0	6.36	0	0.17	Fun
PS43	PS43-RA	2	2	+	231523	233074	0	0	0.04	0	0	35.12	0	1.91	Fun	FBgn0033115	Spn42De
PS44	PS44-RA	2	2	+	233249	234943	0	0	0	0	0.025	318.445	0	5.875	Fun	FBgn0033115	Spn42De
PS45	PS45-RA	2	2	-	237450	241700	0.945	0.65	0.58	0.545	0.355	0.77	0.105	2.04	Fun	FBgn0024288	Sox100B
PS46	PS46-RA	2	2	+	242231	243012	0	0	0	0.155	0	0	0	0	Sil	FBgn0053920	CG33920
PS47	PS47-RA	2	2	-	255558	257187	0.365	0.88	6.185	8.535	0	0	0	0	NA	FBgn0001965	Sos
PS48	PS48-RA	2	2	+	259076	265563	26.715	37.505	68.715	65.155	147.935	33.785	148.075	19.91	Fun	FBgn0002413	dco
PS48	PS48-RB	2	2	+	259076	265568	26.715	37.505	68.715	65.155	147.935	33.785	148.075	19.91	Fun	FBgn0002413	dco
PS48	PS48-RC	2	2	+	259076	265568	26.715	37.505	68.715	65.155	147.935	33.785	148.075	19.91	Fun	FBgn0002413	dco
PS48	PS48-RD	2	2	+	259116	265565	26.715	37.505	68.715	65.155	147.935	33.785	148.075	19.91	Fun	FBgn0002413	dco
PS48	PS48-RE	2	2	+	259116	267460	26.715	37.505	68.715	65.155	147.935	33.785	148.075	19.91	Fun	FBgn0002413	dco
PS48	PS48-RF	2	2	+	259118	267448	26.715	37.505	68.715	65.155	147.935	33.785	148.075	19.91	Fun	FBgn0002413	dco
PS48	PS48-RG	2	2	+	261989	265568	26.715	37.505	68.715	65.155	147.935	33.785	148.075	19.91	Fun	FBgn0002413	dco
PS48	PS48-RH	2	2	+	262340	265563	26.715	37.505	68.715	65.155	147.935	33.785	148.075	19.91	Fun	FBgn0002413	dco
PS49	PS49-RA	2	2	+	269450	270655	68.34	57.255	40.085	37.52	100.27	87.95	190.2	38.285	Fun	FBgn0010808	Chchd3
PS49	PS49-RB	2	2	+	269450	270756	68.34	57.255	40.085	37.52	100.27	87.95	190.2	38.285	Fun	FBgn0010808	Chchd3
PS50	PS50-RA	2	2	-	270594	274407	13.245	19.255	0.405	0.375	38.63	67.43	25.47	6.46	Fun	FBgn0016123	Alp4
PS51	PS51-RA	2	2	-	275663	284184	9.865	11.58	1.215	2.92	4.225	48.43	0.03	72.195	Fun	FBgn0010015	CanA1
PS51	PS51-RB	2	2	-	275663	284602	9.865	11.58	1.215	2.92	4.225	48.43	0.03	72.195	Fun	FBgn0010015	CanA1
PS51	PS51-RC	2	2	-	275664	281544	9.865	11.58	1.215	2.92	4.225	48.43	0.03	72.195	Fun	FBgn0010015	CanA1
PS51	PS51-RD	2	2	-	275664	284602	9.865	11.58	1.215	2.92	4.225	48.43	0.03	72.195	Fun	FBgn0010015	CanA1
PS51	PS51-RE	2	2	-	275664	284602	9.865	11.58	1.215	2.92	4.225	48.43	0.03	72.195	Fun	FBgn0010015	CanA1
PS52	PS52-RA	2	2	-	312805	331590	0	0.025	0	0.01	0.01	0.03	0.005	0.15	Sil	FBgn0053920	CG33920
PS53	PS53-RA	2	2	-	337526	339034	0	0	0	0.235	0	2.87	0	3.475	Fun	FBgn0051897	CG31897
PS54	PS54-RA	2	2	+	343210	344104	0	3.13	0	21.41	0	140.015	0	509.875	Dis	FBgn0051007	CG31007
PS55	PS55-RA	2	2	+	345261	346462	0	0	0	0	0	0	0	0	Sil
PS56	PS56-RA	2	2	+	359662	368745	1.49	1.625	1.595	0.995	0.54	1.995	0	0.075	Fun	FBgn0004573	5-HT7
PS57	PS57-RA	2	2	+	373012	374459	0	0.68	0	6.765	0	4.45	0	4.725	Fun	FBgn0062411	Ctr1C
PS58	PS58-RA	2	2	-	375403	378367	0	1.465	0.03	6.595	0	68.41	0	103.96	Dis	FBgn0039812	CG15548
PS58	PS58-RB	2	2	-	375408	378367	0	1.465	0.03	6.595	0	68.41	0	103.96	Dis	FBgn0039812	CG15548
PS59	PS59-RA	2	2	+	390931	391735	0	3.455	0	24.5	0	48.435	0	283.13	Fun	FBgn0261806	CG42752
PS59	PS59-RB	2	2	+	390931	391735	0	3.455	0	24.5	0	48.435	0	283.13	Fun	FBgn0261806	CG42752
PS60	PS60-RA	2	2	+	402118	411151	1	3.55	0.78	5.95	0.01	29.66	0	201.39	Fun	FBgn0039810	CG15549
PS61	PS61-RA	2	2	-	408963	429084	2	1.88	1.08	1.105	0.89	2.23	0	0.165	Fun	FBgn0020912	Ptx1
PS62	PS62-RA	2	2	-	444883	451071	11.55	5.125	0.03	0.06	0	1.655	0	0.505	Fun	FBgn0015032	Cyp4c3
PS63	PS63-RA	2	2	+	456206	462550	286.68	319.575	175.71	167.14	155.755	178.92	80.52	177.96	Fun	FBgn0000416	Sap-r
PS63	PS63-RB	2	2	+	457042	462550	286.68	319.575	175.71	167.14	155.755	178.92	80.52	177.96	Fun	FBgn0000416	Sap-r
PS63	PS63-RC	2	2	+	457058	462550	286.68	319.575	175.71	167.14	155.755	178.92	80.52	177.96	Fun	FBgn0000416	Sap-r
PS64	PS64-RA	2	2	+	465508	470400	1.19	1.175	8.06	6.26	1.045	3.79	0.535	0.13	Fun	FBgn0039808	CG12071
PS64	PS64-RB	2	2	+	465621	470280	1.19	1.175	8.06	6.26	1.045	3.79	0.535	0.13	Fun	FBgn0039808	CG12071
PS65	PS65-RA	2	2	+	471029	476220	2.15	2.065	3.25	1.9	0.955	4.245	0.005	0.185	Fun	FBgn0039806	CG15545
PS66	PS66-RA	2	2	-	476228	480723	1.79	4.49	6.905	15.975	26.785	16.395	29.585	15.015	Fun	FBgn0052438	SMC5
PS67	PS67-RA	2	2	-	482974	484645	18.39	9.2	20.095	24.525	5.175	42.565	0	0.03	Fun	FBgn0039805	Cpr100A
PS68	PS68-RA	2	2	-	498884	512003	0.405	0.515	0.15	0.34	0.035	0.135	0	0.01	Sil	FBgn0003720	tll
PS69	PS69-RA	2	2	-	512723	527940	0.405	0.555	6.44	6.09	1.27	0.62	0.01	0.09	Fun	FBgn0039804	CG15544
PS69	PS69-RB	2	2	-	512728	527940	0.405	0.555	6.44	6.09	1.27	0.62	0.01	0.09	Fun	FBgn0039804	CG15544
PS70	PS70-RA	2	2	-	528672	554180	7.525	9.135	16.93	18.21	19.065	9.955	20.48	2.225	Fun	FBgn0027598	cindr
PS71	PS71-RA	2	2	-	554420	555683	50.375	73.895	55.245	83.955	75.225	72.78	106.49	81.79	Fun	FBgn0039802	dj-1beta
PS72	PS72-RA	2	2	+	555781	558114	0	0.185	0	1.355	0.05	2.97	0	4.555	Dis	FBgn0037082	CG5664
PS73	PS73-RA	2	2	+	559009	579387	5.385	6.475	20.04	15.78	19.235	7.885	16.22	1.655	Fun	FBgn0011739	wts
PS74	PS74-RA	2	2	-	580292	608436	3.04	6.845	27.045	21.46	10.755	3.93	8.785	1.725	Fun	FBgn0004606	zfh1
PS74	PS74-RB	2	2	-	580334	586918	3.04	6.845	27.045	21.46	10.755	3.93	8.785	1.725	Fun	FBgn0004606	zfh1
PS75	PS75-RA	2	2	+	610138	616989	0	0	0	0	0	0	0	0	Sil
PS76	PS76-RA	2	2	+	621161	621905	0	0	0	0.2	0	1.625	0	2.065	Dis
PS77	PS77-RA	2	2	+	634212	634822	812.9	727.505	591.255	571.235	159.555	424.19	5.705	89.885	Fun	FBgn0039800	Npc2g
PS78	PS78-RA	2	2	-	635759	636836	0	1.605	0	14.67	0	62.255	0	217.835	Fun	FBgn0039799	CG15543
PS79	PS79-RA	2	2	+	648810	649326	0	0	0	0.475	0	2.22	0	8.65	Dis
PS80	PS80-RA	2	2	-	652448	654240	0	3.83	0.055	22.19	0	95.03	0	187.13	Fun	FBgn0039797	eIF4H2
PS81	PS81-RA	2	2	+	675947	677657	0.045	1.585	0.025	10.055	0.885	77.39	0.445	131.86	Fun	FBgn0051010	CG31010
PS81	PS81-RB	2	2	+	675947	677657	0.045	1.585	0.025	10.055	0.885	77.39	0.445	131.86	Fun	FBgn0051010	CG31010
PS82	PS82-RA	2	2	+	685741	688755	0	2.04	0.01	11.265	0.18	92.21	0.08	158.275	Fun	FBgn0039796	CG12069
PS82	PS82-RB	2	2	+	685741	688755	0	2.04	0.01	11.265	0.18	92.21	0.08	158.275	Fun	FBgn0039796	CG12069
PS82	PS82-RC	2	2	+	685741	688755	0	2.04	0.01	11.265	0.18	92.21	0.08	158.275	Fun	FBgn0039796	CG12069
PS82	PS82-RD	2	2	+	685741	688755	0	2.04	0.01	11.265	0.18	92.21	0.08	158.275	Fun	FBgn0039796	CG12069
PS83	PS83-RA	2	2	-	690409	693108	0.22	9.18	788.56	446.105	11.67	42.135	0.045	42.545	Fun	FBgn0039795	Spn100A
PS84	PS84-RA	2	2	+	690429	692536	0	0.055	3.925	1.97	0.095	0.155	0	0.04	Fun
PS85	PS85-RA	2	2	+	717995	719205	0	0.04	0	0.52	0	2.015	0	5.67	Fun
PS86	PS86-RA	2	2	-	729962	730844	0	1.215	0	6.76	0.05	21.45	0	54.9	Dis	FBgn0085462	CG34433
PS87	PS87-RA	2	2	+	731156	733311	13.655	7.495	0.045	8.02	40.855	9.46	0.75	12.52	Fun	FBgn0051013	CG31013
PS87	PS87-RB	2	2	+	731156	733411	13.655	7.495	0.045	8.02	40.855	9.46	0.75	12.52	Fun	FBgn0051013	CG31013
PS87	PS87-RC	2	2	+	731156	736058	13.655	7.495	0.045	8.02	40.855	9.46	0.75	12.52	Fun	FBgn0051013	CG31013
PS87	PS87-RD	2	2	+	733695	736058	13.655	7.495	0.045	8.02	40.855	9.46	0.75	12.52	Fun	FBgn0051013	CG31013
PS88	PS88-RA	2	2	-	750360	759080	0	0.94	0	8.52	0.095	55.955	0.13	113.28	Fun	FBgn0051017	PH4alphaNE3
PS88	PS88-RB	2	2	-	750360	759080	0	0.94	0	8.52	0.095	55.955	0.13	113.28	Fun	FBgn0051017	PH4alphaNE3
PS88	PS88-RC	2	2	-	750360	759080	0	0.94	0	8.52	0.095	55.955	0.13	113.28	Fun	FBgn0051017	PH4alphaNE3
PS88	PS88-RD	2	2	-	750360	759080	0	0.94	0	8.52	0.095	55.955	0.13	113.28	Fun	FBgn0051017	PH4alphaNE3
PS89	PS89-RA	2	2	+	753716	757118	0	0	0	0.1	0.135	2.97	0.02	3.915	Fun	FBgn0051016	CG31016
PS88	PS88-RE	2	2	-	756846	759080	0	0.94	0	8.52	0.095	55.955	0.13	113.28	Fun	FBgn0051017	PH4alphaNE3
PS90	PS90-RA	2	2	+	761520	765083	0	3.255	0	16.96	0.085	112.33	0	169.945	Fun
PS90	PS90-RB	2	2	+	761520	765114	0	3.255	0	16.96	0.085	112.33	0	169.945	Fun
PS91	PS91-RA	2	2	-	780536	782259	0	1.925	0	10.56	0	13.695	0.055	29.885	Fun	FBgn0051013	CG31013
PS91	PS91-RB	2	2	-	780536	782259	0	1.925	0	10.56	0	13.695	0.055	29.885	Fun	FBgn0051013	CG31013
PS92	PS92-RA	2	2	+	782920	783943	0	4.93	0	21.51	0.1	76.875	0.055	147.8	Fun	FBgn0031021	ND-18
PS93	PS93-RA	2	2	-	793611	795647	0	0	0	0	0	21.695	0	0.605	Fun	FBgn0051016	CG31016
PS94	PS94-RA	2	2	+	795777	799005	0	0.31	0.02	2.705	0	12.235	0.03	23.555	Fun	FBgn0051017	PH4alphaNE3
PS94	PS94-RB	2	2	+	795777	800065	0	0.31	0.02	2.705	0	12.235	0.03	23.555	Fun	FBgn0051017	PH4alphaNE3
PS94	PS94-RC	2	2	+	795777	800981	0	0.31	0.02	2.705	0	12.235	0.03	23.555	Fun	FBgn0051017	PH4alphaNE3
PS95	PS95-RA	2	2	-	801239	804026	0	1.145	0	9.77	0.015	32.465	0.02	19.975	Fun	FBgn0051017	PH4alphaNE3
PS95	PS95-RB	2	2	-	801390	804026	0	1.145	0	9.77	0.015	32.465	0.02	19.975	Fun	FBgn0051017	PH4alphaNE3
PS96	PS96-RA	2	2	-	808401	812599	0.215	0.36	0.115	0.38	0.42	71.455	0.165	3.945	Fun	FBgn0051021	CG31021
PS97	PS97-RA	2	2	+	812350	821187	45.9	55.415	60.1	56.705	118.765	31.855	162.135	11.585	Fun	FBgn0039790	CG2246
PS97	PS97-RB	2	2	+	812350	821187	45.9	55.415	60.1	56.705	118.765	31.855	162.135	11.585	Fun	FBgn0039790	CG2246
PS97	PS97-RC	2	2	+	812445	821187	45.9	55.415	60.1	56.705	118.765	31.855	162.135	11.585	Fun	FBgn0039790	CG2246
PS97	PS97-RD	2	2	+	812450	821187	45.9	55.415	60.1	56.705	118.765	31.855	162.135	11.585	Fun	FBgn0039790	CG2246
PS97	PS97-RE	2	2	+	812897	821187	45.9	55.415	60.1	56.705	118.765	31.855	162.135	11.585	Fun	FBgn0039790	CG2246
PS98	PS98-RA	2	2	+	825946	828897	5.145	4.605	1.7	0.865	4.705	7.905	0.24	0.175	Fun	FBgn0039789	CG9717
PS99	PS99-RA	2	2	+	831206	832036	326.38	125	2.265	1.295	15.765	52.965	0	0.365	Fun	FBgn0039719	CG15515
PS100	PS100-RA	2	2	+	833201	837890	0.055	0.065	0.835	0.6	0.165	1.52	0	1.145	Fun	FBgn0051036	CG31036
PS101	PS101-RA	2	2	-	837897	839326	2.065	3.79	8.225	3.9	1.635	10.83	0	0.06	Fun	FBgn0039722	Capa
PS102	PS102-RA	2	2	-	839584	844823	0.01	0.02	0.005	0.025	16.54	54.13	0.05	0.17	Fun	FBgn0003861	trp
PS103	PS103-RA	2	2	+	845429	858336	0.14	0.56	18.19	14.75	1.46	2.905	0.485	0	Fun	FBgn0039723	CG15522
PS104	PS104-RA	2	2	-	847595	854345	10609.6	13005.6	2.585	2.36	1825.99	2166.28	0	0.365	Fun	FBgn0039777	Jon99Fii
PS104	PS104-RB	2	2	-	847595	854388	10609.6	13005.6	2.585	2.36	1825.99	2166.28	0	0.365	Fun	FBgn0039777	Jon99Fii
PS104	PS104-RC	2	2	-	847595	854388	10609.6	13005.6	2.585	2.36	1825.99	2166.28	0	0.365	Fun	FBgn0039777	Jon99Fii
PS104	PS104-RD	2	2	-	847595	854388	10609.6	13005.6	2.585	2.36	1825.99	2166.28	0	0.365	Fun	FBgn0039777	Jon99Fii
PS104	PS104-RE	2	2	-	847595	854388	10609.6	13005.6	2.585	2.36	1825.99	2166.28	0	0.365	Fun	FBgn0039777	Jon99Fii
PS104	PS104-RF	2	2	-	847595	854388	10609.6	13005.6	2.585	2.36	1825.99	2166.28	0	0.365	Fun	FBgn0039777	Jon99Fii
PS104	PS104-RG	2	2	-	847595	854388	10609.6	13005.6	2.585	2.36	1825.99	2166.28	0	0.365	Fun	FBgn0039777	Jon99Fii
PS104	PS104-RH	2	2	-	847595	854388	10609.6	13005.6	2.585	2.36	1825.99	2166.28	0	0.365	Fun	FBgn0039777	Jon99Fii
PS104	PS104-RI	2	2	-	847595	854388	10609.6	13005.6	2.585	2.36	1825.99	2166.28	0	0.365	Fun	FBgn0039777	Jon99Fii
PS104	PS104-RJ	2	2	-	847638	854366	10609.6	13005.6	2.585	2.36	1825.99	2166.28	0	0.365	Fun	FBgn0039777	Jon99Fii
PS104	PS104-RK	2	2	-	847641	854366	10609.6	13005.6	2.585	2.36	1825.99	2166.28	0	0.365	Fun	FBgn0039777	Jon99Fii
PS104	PS104-RL	2	2	-	847641	854388	10609.6	13005.6	2.585	2.36	1825.99	2166.28	0	0.365	Fun	FBgn0039777	Jon99Fii
PS104	PS104-RM	2	2	-	847656	851717	10609.6	13005.6	2.585	2.36	1825.99	2166.28	0	0.365	Fun	FBgn0039777	Jon99Fii
PS104	PS104-RN	2	2	-	847656	854388	10609.6	13005.6	2.585	2.36	1825.99	2166.28	0	0.365	Fun	FBgn0039777	Jon99Fii
PS104	PS104-RO	2	2	-	849912	854388	10609.6	13005.6	2.585	2.36	1825.99	2166.28	0	0.365	Fun	FBgn0039777	Jon99Fii
PS104	PS104-RP	2	2	-	849912	854388	10609.6	13005.6	2.585	2.36	1825.99	2166.28	0	0.365	Fun	FBgn0039777	Jon99Fii
PS105	PS105-RA	2	2	-	855068	856195	47.15	40.75	0.125	0.295	3.52	5.16	0	0.245	Fun	FBgn0003358	Jon99Ci
PS106	PS106-RA	2	2	-	858085	862582	5.545	6.925	8.3	9.565	8.15	10.47	9.67	6.96	Fun	FBgn0051040	Cog7
PS107	PS107-RA	2	2	+	871645	872976	8.55	19.63	34.21	59.22	33.72	58.385	31.815	88.86	Fun	FBgn0260760	CG42558
PS108	PS108-RA	2	2	-	872898	874795	11.615	15.59	12.83	16.82	23.725	14.345	17.59	14.305	Fun	FBgn0039726	eIF2Balpha
PS109	PS109-RA	2	2	+	874765	887227	4.15	5.65	3.02	4.2	3.945	31.56	4.015	34.2	Fun	FBgn0039727	Vps13B
PS109	PS109-RB	2	2	+	874765	887227	4.15	5.65	3.02	4.2	3.945	31.56	4.015	34.2	Fun	FBgn0039727	Vps13B
PS109	PS109-RC	2	2	+	874765	887227	4.15	5.65	3.02	4.2	3.945	31.56	4.015	34.2	Fun	FBgn0039727	Vps13B
PS109	PS109-RD	2	2	+	874765	887239	4.15	5.65	3.02	4.2	3.945	31.56	4.015	34.2	Fun	FBgn0039727	Vps13B
PS110	PS110-RA	2	2	-	889113	905242	0.55	1.25	5.115	4.05	0.48	1.88	0.035	0.21	Fun	FBgn0004622	TkR99D
PS111	PS111-RA	2	2	+	916661	923834	5.87	5.525	25.415	15.5	0.23	0.795	0.005	0.03	Fun	FBgn0039728	CG7896
PS112	PS112-RA	2	2	-	923834	926064	18.86	27.55	39.485	38.69	61.97	13.33	50.86	12.345	Fun	FBgn0000032	Acph-1
PS112	PS112-RB	2	2	-	923834	927947	18.86	27.55	39.485	38.69	61.97	13.33	50.86	12.345	Fun	FBgn0000032	Acph-1
PS113	PS113-RA	2	2	+	927955	930176	2.685	6.76	4.63	32.775	19.4	28.945	24.25	32.535	Fun	FBgn0039731	Sas-6
PS114	PS114-RA	2	2	-	929576	932537	8.665	9.495	12.885	11.885	39.535	11.345	35.14	8.9	Fun	FBgn0039732	CG15525
PS115	PS115-RA	2	2	+	930414	936305	4.1	5.7	11.55	15.96	13.585	61.25	15.205	82.975	Fun	FBgn0039734	Tace
PS115	PS115-RB	2	2	+	930455	936299	4.1	5.7	11.55	15.96	13.585	61.25	15.205	82.975	Fun	FBgn0039734	Tace
PS116	PS116-RA	2	2	-	936198	938145	43.165	53.82	64.745	67.675	288.905	55.455	393.995	113.62	Fun	FBgn0039735	Nph
PS117	PS117-RA	2	2	+	936359	937265	0.985	0.77	2.385	2.67	0.075	0	0.395	1.51	Dis
PS118	PS118-RA	2	2	+	937699	942696	284.255	440.715	668.125	686.65	686.775	71.38	411.615	34.975	Fun	FBgn0016685	Nlp
PS119	PS119-RA	2	2	-	938525	939769	1.875	0.88	0.385	0.2	1.74	3.31	0.095	0.37	Dis	FBgn0039736	CG7912
PS120	PS120-RA	2	2	-	942651	946700	273.245	193.815	151.385	131.45	232.065	286.625	242.17	302.57	Fun	FBgn0039737	CG7920
PS120	PS120-RB	2	2	-	942651	946700	273.245	193.815	151.385	131.45	232.065	286.625	242.17	302.57	Fun	FBgn0039737	CG7920
PS121	PS121-RA	2	2	-	946900	954080	3.09	5.22	8.575	15.5	11.19	20.505	7.89	12.575	Fun	FBgn0039738	Mgat2
PS121	PS121-RB	2	2	-	946900	954138	3.09	5.22	8.575	15.5	11.19	20.505	7.89	12.575	Fun	FBgn0039738	Mgat2
PS121	PS121-RC	2	2	-	946900	954384	3.09	5.22	8.575	15.5	11.19	20.505	7.89	12.575	Fun	FBgn0039738	Mgat2
PS121	PS121-RD	2	2	-	947173	954025	3.09	5.22	8.575	15.5	11.19	20.505	7.89	12.575	Fun	FBgn0039738	Mgat2
PS122	PS122-RA	2	2	+	953993	969815	2.93	4.815	13.205	12.865	18.2	11.265	18.05	9.715	Fun	FBgn0026597	Axn
PS122	PS122-RB	2	2	+	953993	969815	2.93	4.815	13.205	12.865	18.2	11.265	18.05	9.715	Fun	FBgn0026597	Axn
PS122	PS122-RC	2	2	+	954106	969811	2.93	4.815	13.205	12.865	18.2	11.265	18.05	9.715	Fun	FBgn0026597	Axn
PS122	PS122-RD	2	2	+	954624	969812	2.93	4.815	13.205	12.865	18.2	11.265	18.05	9.715	Fun	FBgn0026597	Axn
PS123	PS123-RA	2	2	-	969602	977656	12.21	18.5	22.92	38.52	38.54	116.94	40.205	397.155	Fun	FBgn0039740	ZIPIC
PS123	PS123-RB	2	2	-	969743	975575	12.21	18.5	22.92	38.52	38.54	116.94	40.205	397.155	Fun	FBgn0039740	ZIPIC
PS124	PS124-RA	2	2	+	972647	977195	2.125	3.2	9.165	9.75	4.915	5.59	5.715	6.015	Fun	FBgn0003511	Sry-beta
PS124	PS124-RB	2	2	+	973350	976977	2.125	3.2	9.165	9.75	4.915	5.59	5.715	6.015	Fun	FBgn0003511	Sry-beta
PS125	PS125-RA	2	2	+	977390	979468	7.595	10.485	19.415	19.83	23.8	8.095	33.105	4.585	Fun	FBgn0003512	Sry-delta
PS125	PS125-RB	2	2	+	977390	979475	7.595	10.485	19.415	19.83	23.8	8.095	33.105	4.585	Fun	FBgn0003512	Sry-delta
PS126	PS126-RA	2	2	-	978757	979937	1825.05	2259.97	2402.06	2369.51	1832.02	517.5	1896.56	280.68	Dis	FBgn0002626	RpL32
PS126	PS126-RB	2	2	-	978757	979939	1825.05	2259.97	2402.06	2369.51	1832.02	517.5	1896.56	280.68	Dis	FBgn0002626	RpL32
PS126	PS126-RC	2	2	-	978801	979905	1825.05	2259.97	2402.06	2369.51	1832.02	517.5	1896.56	280.68	Dis	FBgn0002626	RpL32
PS127	PS127-RA	2	2	+	979979	983056	3.02	3.285	3.76	5.48	16.42	11.385	14.165	18.98	Fun	FBgn0039741	CG7943
PS128	PS128-RA	2	2	-	981742	984960	11.83	21.39	0.235	0.47	5.165	28.07	0.545	1.3	Fun	FBgn0039742	CG15528
PS129	PS129-RA	2	2	+	986389	988602	14.52	27.43	45.52	59.855	63.945	47.715	60.71	52.58	Fun	FBgn0039743	Jasper
PS130	PS130-RA	2	2	-	988313	992211	2.995	5.18	4.425	6.57	24.81	5.485	77.01	12.675	Fun	FBgn0003479	spn-A
PS130	PS130-RB	2	2	-	988513	992267	2.995	5.18	4.425	6.57	24.81	5.485	77.01	12.675	Fun	FBgn0003479	spn-A
PS131	PS131-RA	2	2	+	990328	992289	10.72	14.31	16.88	28.53	55.535	37.115	54.375	80.965	Fun	FBgn0260468	CG7950
PS131	PS131-RB	2	2	+	990328	992289	10.72	14.31	16.88	28.53	55.535	37.115	54.375	80.965	Fun	FBgn0260468	CG7950
PS132	PS132-RA	2	2	+	992407	1058486	13.135	13.67	28.515	29.59	25.36	15.91	18.175	17.31	Fun	FBgn0266411	sima
PS133	PS133-RA	2	2	-	1005913	1006969	0	0	0	0.165	0	1.91	0	2.74	Dis
PS132	PS132-RB	2	2	+	1031468	1058486	13.135	13.67	28.515	29.59	25.36	15.91	18.175	17.31	Fun	FBgn0266411	sima
PS132	PS132-RC	2	2	+	1031776	1057832	13.135	13.67	28.515	29.59	25.36	15.91	18.175	17.31	Fun	FBgn0266411	sima
PS132	PS132-RD	2	2	+	1053043	1058486	13.135	13.67	28.515	29.59	25.36	15.91	18.175	17.31	Fun	FBgn0266411	sima
PS134	PS134-RA	2	2	+	1063176	1076703	3.105	2.39	14.27	9.775	11.305	2.035	3.535	0.165	Fun	FBgn0039709	Cad99C
PS134	PS134-RB	2	2	+	1063176	1076763	3.105	2.39	14.27	9.775	11.305	2.035	3.535	0.165	Fun	FBgn0039709	Cad99C
PS135	PS135-RA	2	2	-	1075915	1076245	0	0.54	4.76	3.315	0	0	0	0.585	Dis
PS136	PS136-RA	2	2	-	1076341	1079160	10.3	16.55	17.855	19.55	49.71	13.075	62.325	8.725	Fun	FBgn0039710	dgt1
PS137	PS137-RA	2	2	-	1079445	1081396	0.205	0.915	0.165	1.72	24.245	1.975	24.735	1.515	Fun	FBgn0033921	tej
PS138	PS138-RA	2	2	-	1082244	1084459	3.145	5.51	8.095	9.93	21.66	10.42	26.525	10.14	Fun	FBgn0039712	CG15514
PS138	PS138-RB	2	2	-	1082244	1084459	3.145	5.51	8.095	9.93	21.66	10.42	26.525	10.14	Fun	FBgn0039712	CG15514
PS138	PS138-RC	2	2	-	1082298	1084112	3.145	5.51	8.095	9.93	21.66	10.42	26.525	10.14	Fun	FBgn0039712	CG15514
PS138	PS138-RD	2	2	-	1082298	1084112	3.145	5.51	8.095	9.93	21.66	10.42	26.525	10.14	Fun	FBgn0039712	CG15514
PS139	PS139-RA	2	2	+	1083948	1086589	3491.92	4114.19	3751.38	3442.79	3371.11	866.6	8449.35	980.115	Fun	FBgn0039713	RpS8
PS139	PS139-RB	2	2	+	1084867	1086589	3491.92	4114.19	3751.38	3442.79	3371.11	866.6	8449.35	980.115	Fun	FBgn0039713	RpS8
PS139	PS139-RC	2	2	+	1084898	1086587	3491.92	4114.19	3751.38	3442.79	3371.11	866.6	8449.35	980.115	Fun	FBgn0039713	RpS8
PS140	PS140-RA	2	2	-	1084930	1086460	2.765	2.64	6.235	4.94	0.6	0.06	0.42	0.27	Dis
PS141	PS141-RA	2	2	-	1086527	1091248	28.945	44.555	25.11	44.36	74.62	120.385	119.42	291.65	Fun	FBgn0039714	Zip99C
PS141	PS141-RB	2	2	-	1086532	1089931	28.945	44.555	25.11	44.36	74.62	120.385	119.42	291.65	Fun	FBgn0039714	Zip99C
PS142	PS142-RA	2	2	+	1090796	1096854	6.27	10.935	8.895	28.69	26.39	47.995	29.73	61.31	Fun	FBgn0083969	CG34133
PS142	PS142-RB	2	2	+	1090796	1096855	6.27	10.935	8.895	28.69	26.39	47.995	29.73	61.31	Fun	FBgn0083969	CG34133
PS142	PS142-RC	2	2	+	1091723	1096847	6.27	10.935	8.895	28.69	26.39	47.995	29.73	61.31	Fun	FBgn0083969	CG34133
PS142	PS142-RD	2	2	+	1091809	1096855	6.27	10.935	8.895	28.69	26.39	47.995	29.73	61.31	Fun	FBgn0083969	CG34133
PS143	PS143-RA	2	2	+	1097968	1117899	13.665	15.705	23.42	22.995	12.415	34.995	6.285	11.645	Fun	FBgn0051038	CG31038
PS143	PS143-RB	2	2	+	1097968	1117899	13.665	15.705	23.42	22.995	12.415	34.995	6.285	11.645	Fun	FBgn0051038	CG31038
PS143	PS143-RC	2	2	+	1098004	1117893	13.665	15.705	23.42	22.995	12.415	34.995	6.285	11.645	Fun	FBgn0051038	CG31038
PS143	PS143-RD	2	2	+	1098007	1117893	13.665	15.705	23.42	22.995	12.415	34.995	6.285	11.645	Fun	FBgn0051038	CG31038
PS143	PS143-RE	2	2	+	1106856	1117899	13.665	15.705	23.42	22.995	12.415	34.995	6.285	11.645	Fun	FBgn0051038	CG31038
PS143	PS143-RF	2	2	+	1106874	1117892	13.665	15.705	23.42	22.995	12.415	34.995	6.285	11.645	Fun	FBgn0051038	CG31038
PS143	PS143-RG	2	2	+	1106874	1117892	13.665	15.705	23.42	22.995	12.415	34.995	6.285	11.645	Fun	FBgn0051038	CG31038
PS143	PS143-RH	2	2	+	1106874	1117893	13.665	15.705	23.42	22.995	12.415	34.995	6.285	11.645	Fun	FBgn0051038	CG31038
PS144	PS144-RA	2	2	-	1123090	1125647	26.885	19.22	1.845	1.18	2.13	2.56	0.06	0.035	Fun	FBgn0039787	CG9702
PS145	PS145-RA	2	2	-	1126570	1144824	48.945	67.47	265.96	314.905	39.24	105.355	13.67	13.175	Fun	FBgn0082582	tmod
PS145	PS145-RB	2	2	-	1126570	1144824	48.945	67.47	265.96	314.905	39.24	105.355	13.67	13.175	Fun	FBgn0082582	tmod
PS145	PS145-RC	2	2	-	1126570	1162702	48.945	67.47	265.96	314.905	39.24	105.355	13.67	13.175	Fun	FBgn0082582	tmod
PS145	PS145-RD	2	2	-	1126570	1170117	48.945	67.47	265.96	314.905	39.24	105.355	13.67	13.175	Fun	FBgn0082582	tmod
PS145	PS145-RE	2	2	-	1126570	1176842	48.945	67.47	265.96	314.905	39.24	105.355	13.67	13.175	Fun	FBgn0082582	tmod
PS145	PS145-RF	2	2	-	1126578	1176442	48.945	67.47	265.96	314.905	39.24	105.355	13.67	13.175	Fun	FBgn0082582	tmod
PS145	PS145-RG	2	2	-	1126587	1144712	48.945	67.47	265.96	314.905	39.24	105.355	13.67	13.175	Fun	FBgn0082582	tmod
PS145	PS145-RH	2	2	-	1126587	1177138	48.945	67.47	265.96	314.905	39.24	105.355	13.67	13.175	Fun	FBgn0082582	tmod
PS145	PS145-RI	2	2	-	1126587	1177138	48.945	67.47	265.96	314.905	39.24	105.355	13.67	13.175	Fun	FBgn0082582	tmod
PS146	PS146-RA	2	2	+	1126726	1133157	0.33	0.405	4.11	3.685	0.115	0.23	0.015	0.015	Fun
PS147	PS147-RA	2	2	+	1148559	1154007	0.39	0.65	6.4	5.235	0.615	2.76	0	0.03	Fun
PS148	PS148-RA	2	2	+	1168428	1169664	0	0.56	0.165	1.6	0	3.575	0	4.375	Fun
PS145	PS145-RJ	2	2	-	1171815	1176442	48.945	67.47	265.96	314.905	39.24	105.355	13.67	13.175	Fun	FBgn0082582	tmod
PS149	PS149-RA	2	2	+	1177111	1178730	0	0.35	12.41	13.155	0.185	0.44	0	0.105	Dis
PS150	PS150-RA	2	2	+	1179354	1180132	0	0	7.61	6.44	0	0	0	0	Fun
PS151	PS151-RA	2	2	+	1181815	1192202	10.985	10.905	37.56	38.315	11.25	36.645	4.025	5.12	Fun	FBgn0027654	jdp
PS151	PS151-RB	2	2	+	1181851	1192007	10.985	10.905	37.56	38.315	11.25	36.645	4.025	5.12	Fun	FBgn0027654	jdp
PS152	PS152-RA	2	2	-	1192135	1194518	0.105	0.025	1.35	0.525	0	6.425	0	0.29	Fun	FBgn0039784	CG9698
PS153	PS153-RA	2	2	-	1194627	1197153	0.05	0.06	0	0	0	18.04	0	0.55	Fun	FBgn0039783	PH4alphaNE2
PS154	PS154-RA	2	2	-	1197263	1202276	0.17	0.22	0	0	0	24.7	0	0.685	Fun	FBgn0039783	PH4alphaNE2
PS155	PS155-RA	2	2	+	1202600	1204587	30.305	24.165	0.125	0	0.045	1.945	0.02	0.095	Dis	FBgn0051014	PH4alphaSG1
PS156	PS156-RA	2	2	+	1204621	1207509	0.24	0.635	0.225	3.555	0	9.725	0	20.09	Fun	FBgn0051371	CG31371
PS157	PS157-RA	2	2	+	1212296	1217860	8.16	6.695	0.765	0.5	0.145	0.38	0	0	Fun	FBgn0026190	PH4alphaMP
PS158	PS158-RA	2	2	-	1215794	1217817	47.09	33.74	0.015	0	0.155	0	0	0.045	Fun	FBgn0039779	PH4alphaSG2
PS159	PS159-RA	2	2	-	1218645	1234412	17.115	12.055	18.47	17.95	46.215	48.485	9.92	5.27	Fun	FBgn0039776	PH4alphaEFB
PS160	PS160-RA	2	2	-	1235654	1240288	7.465	6.085	11.325	9.37	4.4	4.125	0.445	2.01	Fun	FBgn0039774	CDase
PS160	PS160-RB	2	2	-	1235710	1238735	7.465	6.085	11.325	9.37	4.4	4.125	0.445	2.01	Fun	FBgn0039774	CDase
PS160	PS160-RC	2	2	-	1235710	1240288	7.465	6.085	11.325	9.37	4.4	4.125	0.445	2.01	Fun	FBgn0039774	CDase
PS160	PS160-RD	2	2	-	1235710	1240288	7.465	6.085	11.325	9.37	4.4	4.125	0.445	2.01	Fun	FBgn0039774	CDase
PS160	PS160-RE	2	2	-	1235710	1240870	7.465	6.085	11.325	9.37	4.4	4.125	0.445	2.01	Fun	FBgn0039774	CDase
PS161	PS161-RA	2	2	+	1241665	1244156	8.685	13.57	12.64	15.62	30.205	11.25	31.71	4.79	Fun	FBgn0039773	CG2224
PS162	PS162-RA	2	2	+	1244771	1254006	32.025	24.465	8.455	8.03	47.79	18.64	59.805	3.36	Fun	FBgn0028646	aralar1
PS162	PS162-RB	2	2	+	1245991	1254032	32.025	24.465	8.455	8.03	47.79	18.64	59.805	3.36	Fun	FBgn0028646	aralar1
PS162	PS162-RC	2	2	+	1245991	1254032	32.025	24.465	8.455	8.03	47.79	18.64	59.805	3.36	Fun	FBgn0028646	aralar1
PS162	PS162-RD	2	2	+	1246259	1254005	32.025	24.465	8.455	8.03	47.79	18.64	59.805	3.36	Fun	FBgn0028646	aralar1
PS163	PS163-RA	2	2	+	1254549	1255638	0	0	0	0	0	0	0.04	0	Sil	FBgn0039771	Osi23
PS164	PS164-RA	2	2	+	1256061	1264437	0.87	0.6	1.77	1.565	0.615	1.895	0	0	Fun	FBgn0039770	CG15537
PS165	PS165-RA	2	2	-	1264503	1266841	23.465	11.74	0	0.025	1.8	1.71	0.075	0.06	Fun	FBgn0039769	CG15534
PS166	PS166-RA	2	2	-	1267370	1270352	19.225	11.045	0.24	0.35	1.365	3.045	0.465	1.82	Fun	FBgn0039768	CG15533
PS167	PS167-RA	2	2	+	1271849	1274390	10.325	16.71	18.71	22.925	40.775	14.3	59.38	10.1	Fun	FBgn0039767	CG2218
PS168	PS168-RA	2	2	+	1274747	1276379	1.335	2.07	2.355	4.575	21.76	4.37	29.935	3.625	Fun	FBgn0039766	CG15536
PS169	PS169-RA	2	2	-	1276308	1276998	48.095	53.725	59.4	72.2	104.475	61.22	96.425	48.35	Fun	FBgn0039765	mRpS18C
PS170	PS170-RA	2	2	+	1277263	1279910	5.565	6.305	8.99	7.375	21.685	5.6	15.005	1.95	Fun	FBgn0039764	CG15535
PS170	PS170-RB	2	2	+	1277263	1279910	5.565	6.305	8.99	7.375	21.685	5.6	15.005	1.95	Fun	FBgn0039764	CG15535
PS171	PS171-RA	2	2	-	1300547	1302316	464.765	491.195	471.295	440.525	498.33	436.88	175.595	158.445	Fun	FBgn0015221	Fer2LCH
PS172	PS172-RA	2	2	+	1301353	1305552	231.05	243.19	269.705	260.855	254.12	259.68	143.725	121.85	Fun	FBgn0015222	Fer1HCH
PS172	PS172-RB	2	2	+	1301456	1305549	231.05	243.19	269.705	260.855	254.12	259.68	143.725	121.85	Fun	FBgn0015222	Fer1HCH
PS172	PS172-RC	2	2	+	1301456	1305549	231.05	243.19	269.705	260.855	254.12	259.68	143.725	121.85	Fun	FBgn0015222	Fer1HCH
PS172	PS172-RD	2	2	+	1301456	1305552	231.05	243.19	269.705	260.855	254.12	259.68	143.725	121.85	Fun	FBgn0015222	Fer1HCH
PS172	PS172-RE	2	2	+	1301456	1305552	231.05	243.19	269.705	260.855	254.12	259.68	143.725	121.85	Fun	FBgn0015222	Fer1HCH
PS172	PS172-RF	2	2	+	1302837	1305552	231.05	243.19	269.705	260.855	254.12	259.68	143.725	121.85	Fun	FBgn0015222	Fer1HCH
PS173	PS173-RA	2	2	-	1307476	1309144	0.03	0.09	0	0.43	0	1.36	0	2.985	Fun
PS174	PS174-RA	2	2	-	1321203	1406371	5.415	6.445	37.77	39.005	30.405	2.1	43.5	1.105	Fun	FBgn0010113	hdc
PS175	PS175-RA	2	2	+	1429560	1440089	0.43	1.27	1.005	0.95	2.285	2.105	0.635	1.195	Fun	FBgn0039759	CG9733
PS176	PS176-RA	2	2	-	1429927	1430983	931.23	1033.84	0.095	0.21	145.46	81.605	0	0	Fun	FBgn0039761	CG18404
PS176	PS176-RB	2	2	-	1429935	1430980	931.23	1033.84	0.095	0.21	145.46	81.605	0	0	Fun	FBgn0039761	CG18404
PS177	PS177-RA	2	2	+	1430033	1431045	3.07	4.25	0	0	0	0	0	0	Dis
PS178	PS178-RA	2	2	-	1431190	1432616	344.305	346.47	0.085	0.115	0.39	0.32	0	0	Fun	FBgn0039760	CG9682
PS179	PS179-RA	2	2	+	1431696	1432541	1.77	0.98	0	0	0	0	0	0	Dis
PS180	PS180-RA	2	2	-	1434013	1434486	0	0	0	0.275	0	145.78	0	3.89	Dis
PS175	PS175-RB	2	2	+	1439121	1440101	0.43	1.27	1.005	0.95	2.285	2.105	0.635	1.195	Fun	FBgn0039759	CG9733
PS181	PS181-RA	2	2	+	1440523	1442879	0.775	0.295	0.34	0.74	2.085	1.65	2.315	4.315	Fun	FBgn0039758	CG9737
PS182	PS182-RA	2	2	-	1451225	1452516	0	0.04	0	0.33	0	2.86	0	4.555	Fun
PS183	PS183-RA	2	2	-	1465854	1466304	0.435	4.735	105.92	181.305	0.925	1.33	0	2.98	Fun	FBgn0000279	CecC
PS183	PS183-RB	2	2	-	1465854	1469620	0.435	4.735	105.92	181.305	0.925	1.33	0	2.98	Fun	FBgn0000279	CecC
PS183	PS183-RC	2	2	-	1465854	1471194	0.435	4.735	105.92	181.305	0.925	1.33	0	2.98	Fun	FBgn0000279	CecC
PS183	PS183-RD	2	2	-	1469258	1469620	0.435	4.735	105.92	181.305	0.925	1.33	0	2.98	Fun	FBgn0000279	CecC
PS183	PS183-RE	2	2	-	1469258	1471194	0.435	4.735	105.92	181.305	0.925	1.33	0	2.98	Fun	FBgn0000279	CecC
PS184	PS184-RA	2	2	+	1471150	1477287	2203.25	2762.64	2863.76	2681.36	2261.97	575.6	2440.66	232.385	Fun	FBgn0039757	RpS7
PS185	PS185-RA	2	2	-	1471861	1472495	0	0	0.2	0.825	0.085	40.3	0	0.895	Fun	FBgn0000279	CecC
PS185	PS185-RB	2	2	-	1471861	1472495	0	0	0.2	0.825	0.085	40.3	0	0.895	Fun	FBgn0000279	CecC
PS186	PS186-RA	2	2	-	1472936	1474567	0.28	0.99	2.585	3.645	1.59	5.42	0.845	12.89	Fun	FBgn0000279	CecC
PS186	PS186-RB	2	2	-	1472941	1474062	0.28	0.99	2.585	3.645	1.59	5.42	0.845	12.89	Fun	FBgn0000279	CecC
PS184	PS184-RB	2	2	+	1474883	1477404	2203.25	2762.64	2863.76	2681.36	2261.97	575.6	2440.66	232.385	Fun	FBgn0039757	RpS7
PS184	PS184-RC	2	2	+	1474982	1477404	2203.25	2762.64	2863.76	2681.36	2261.97	575.6	2440.66	232.385	Fun	FBgn0039757	RpS7
PS184	PS184-RD	2	2	+	1475113	1477287	2203.25	2762.64	2863.76	2681.36	2261.97	575.6	2440.66	232.385	Fun	FBgn0039757	RpS7
PS184	PS184-RE	2	2	+	1475117	1477286	2203.25	2762.64	2863.76	2681.36	2261.97	575.6	2440.66	232.385	Fun	FBgn0039757	RpS7
PS187	PS187-RA	2	2	+	1481114	1486528	23.375	18.04	8.885	4.505	59.985	34	37.75	13.89	Fun	FBgn0039756	CG9743
PS187	PS187-RB	2	2	+	1481114	1486528	23.375	18.04	8.885	4.505	59.985	34	37.75	13.89	Fun	FBgn0039756	CG9743
PS188	PS188-RA	2	2	+	1486665	1488242	26.955	39.36	22.96	19.33	51.175	67.225	0.475	1.1	Fun	FBgn0039755	CG15531
PS189	PS189-RA	2	2	+	1491649	1497163	4.67	3.83	3.015	3.335	54.365	23.3	2.175	2.82	Fun	FBgn0039754	CG9747
PS190	PS190-RA	2	2	-	1500339	1501212	17.435	28.76	45.255	42.385	63.48	25.18	207.46	47.18	Fun	FBgn0260860	Bet5
PS190	PS190-RB	2	2	-	1500339	1501212	17.435	28.76	45.255	42.385	63.48	25.18	207.46	47.18	Fun	FBgn0260860	Bet5
PS190	PS190-RC	2	2	-	1500339	1501212	17.435	28.76	45.255	42.385	63.48	25.18	207.46	47.18	Fun	FBgn0260860	Bet5
PS191	PS191-RA	2	2	-	1501680	1504193	0	1.275	0	8.79	0.03	106.405	0.02	202.635	Dis	FBgn0039752	CG15530
PS191	PS191-RB	2	2	-	1501680	1504193	0	1.275	0	8.79	0.03	106.405	0.02	202.635	Dis	FBgn0039752	CG15530
PS192	PS192-RA	2	2	-	1504535	1507910	1.615	2.64	4.25	11.37	12.845	9.94	15.6	11.11	Fun	FBgn0025808	Rad17
PS193	PS193-RA	2	2	+	1506345	1508597	6.835	7.79	10.05	9.67	10.765	12.92	20.725	16.39	Fun	FBgn0039751	CG1983
PS193	PS193-RB	2	2	+	1506399	1508879	6.835	7.79	10.05	9.67	10.765	12.92	20.725	16.39	Fun	FBgn0039751	CG1983
PS193	PS193-RC	2	2	+	1506399	1508879	6.835	7.79	10.05	9.67	10.765	12.92	20.725	16.39	Fun	FBgn0039751	CG1983
PS193	PS193-RD	2	2	+	1506399	1508879	6.835	7.79	10.05	9.67	10.765	12.92	20.725	16.39	Fun	FBgn0039751	CG1983
PS193	PS193-RE	2	2	+	1506399	1508921	6.835	7.79	10.05	9.67	10.765	12.92	20.725	16.39	Fun	FBgn0039751	CG1983
PS194	PS194-RA	2	2	+	1509906	1513087	5912.88	4016.96	466.155	211.865	1082.5	4741.1	23.495	4.715	Fun	FBgn0002773	Mlc2
PS194	PS194-RB	2	2	+	1509957	1513085	5912.88	4016.96	466.155	211.865	1082.5	4741.1	23.495	4.715	Fun	FBgn0002773	Mlc2
PS195	PS195-RA	2	2	-	1510003	1512586	10.815	10.625	2.56	1.125	0.265	1.06	0	0	Fun
PS196	PS196-RA	2	2	+	1513360	1519741	4.8	5.89	23.685	20.905	1.875	7.775	0.005	0.07	Fun	FBgn0051028	CG31028
PS197	PS197-RA	2	2	+	1523274	1530088	0.255	0.435	6.715	5.795	0.2	0.235	0.06	0.095	Fun	FBgn0039749	CG11498
PS198	PS198-RA	2	2	-	1529665	1530870	0.6	0.33	3.14	2.315	0.83	2.695	0	0.08	Fun	FBgn0039748	CG15529
PS199	PS199-RA	2	2	+	1533330	1548845	795.21	743.125	160.37	186.52	316.855	769.58	238.605	623.39	Fun	FBgn0051025	Ppi1
PS199	PS199-RB	2	2	+	1542995	1548845	795.21	743.125	160.37	186.52	316.855	769.58	238.605	623.39	Fun	FBgn0051025	Ppi1
PS199	PS199-RC	2	2	+	1542995	1548853	795.21	743.125	160.37	186.52	316.855	769.58	238.605	623.39	Fun	FBgn0051025	Ppi1
PS199	PS199-RD	2	2	+	1544777	1548782	795.21	743.125	160.37	186.52	316.855	769.58	238.605	623.39	Fun	FBgn0051025	Ppi1
PS199	PS199-RE	2	2	+	1544777	1548782	795.21	743.125	160.37	186.52	316.855	769.58	238.605	623.39	Fun	FBgn0051025	Ppi1
PS199	PS199-RF	2	2	+	1544777	1555787	795.21	743.125	160.37	186.52	316.855	769.58	238.605	623.39	Fun	FBgn0051025	Ppi1
PS199	PS199-RG	2	2	+	1547394	1548782	795.21	743.125	160.37	186.52	316.855	769.58	238.605	623.39	Fun	FBgn0051025	Ppi1
PS199	PS199-RH	2	2	+	1549018	1555787	795.21	743.125	160.37	186.52	316.855	769.58	238.605	623.39	Fun	FBgn0051025	Ppi1
PS199	PS199-RI	2	2	+	1549018	1555787	795.21	743.125	160.37	186.52	316.855	769.58	238.605	623.39	Fun	FBgn0051025	Ppi1
PS199	PS199-RJ	2	2	+	1552326	1555787	795.21	743.125	160.37	186.52	316.855	769.58	238.605	623.39	Fun	FBgn0051025	Ppi1
PS200	PS200-RA	2	2	-	1555577	1557268	0	0	0.02	0.065	4.065	10.235	0	1.395	Fun	FBgn0039703	CG7829
PS201	PS201-RA	2	2	+	1560235	1561366	0.155	1.88	0.9	15.485	0.08	38.435	0	38.95	NA	FBgn0261998	CG42816
PS201	PS201-RB	2	2	+	1560238	1561359	0.155	1.88	0.9	15.485	0.08	38.435	0	38.95	NA	FBgn0261998	CG42816
PS202	PS202-RA	2	2	+	1561967	1564245	33.065	23.935	10.815	8.345	24.66	3.025	31.585	0.24	Dis	FBgn0039073	CG4408
PS202	PS202-RB	2	2	+	1561969	1564234	33.065	23.935	10.815	8.345	24.66	3.025	31.585	0.24	Dis	FBgn0039073	CG4408
PS202	PS202-RC	2	2	+	1561969	1564234	33.065	23.935	10.815	8.345	24.66	3.025	31.585	0.24	Dis	FBgn0039073	CG4408
PS203	PS203-RA	2	2	-	1565873	1567355	1490.88	1782.54	1801.93	1750.26	1588.73	439.42	1889.68	169.95	Fun	FBgn0002622	RpS3
PS204	PS204-RA	2	2	+	1566002	1567265	3.63	3.945	8.85	6.98	0.43	0.19	0.47	0.38	Fun
PS205	PS205-RA	2	2	+	1568528	1570660	1.48	1.18	0.04	0.54	0.055	1.19	0	1.6	Fun	FBgn0039609	Nepl17
PS206	PS206-RA	2	2	+	1571130	1573238	21.975	14.87	10.355	7.215	1.64	1.125	0.08	0.795	Dis	FBgn0039611	Nepl18
PS207	PS207-RA	2	2	+	1573674	1577081	9.31	12.195	20.285	19.49	13.945	9.185	15.99	2.915	Fun	FBgn0051357	Kaz
PS208	PS208-RA	2	2	-	1580606	1585966	8.585	12.57	20.905	25.115	30.625	22.6	27.16	10.455	Fun	FBgn0039229	Saf-B
PS208	PS208-RB	2	2	-	1580699	1585966	8.585	12.57	20.905	25.115	30.625	22.6	27.16	10.455	Fun	FBgn0039229	Saf-B
PS209	PS209-RA	2	2	+	1586330	1588567	8.125	9.535	15.755	15.95	45.92	8.9	66.145	9.565	Fun	FBgn0027617	CG5808
PS210	PS210-RA	2	2	-	1588523	1590302	2.925	4.245	2.585	6.265	10.4	31.355	22.775	189.56	Fun	FBgn0083986	CG34150
PS211	PS211-RA	2	2	+	1589488	1598591	5.485	5.835	9.315	8.635	22.82	7.035	23.9	5.81	Fun	FBgn0027539	lili
PS212	PS212-RA	2	2	-	1595659	1596711	0.11	11.42	2.1	46.245	0.05	86.475	0.05	104.47	Fun	FBgn0039228	CG6980
PS213	PS213-RA	2	2	+	1599335	1605060	5.055	6.03	8.265	9.03	15.59	4.41	26.215	2.675	Fun	FBgn0039227	polybromo
PS214	PS214-RA	2	2	+	1605541	1607308	52.185	36.04	0.47	0.495	9.455	19.505	6.5	2.695	Fun	FBgn0039226	Ude
PS215	PS215-RA	2	2	-	1607364	1613513	0.025	0.045	0.015	0	0	0.14	0	0.055	Sil	FBgn0039225	Ets96B
PS216	PS216-RA	2	2	+	1614274	1616734	0	0.035	0.555	0.705	0	0.095	0	0	Sil	FBgn0039224	CG13634
PS217	PS217-RA	2	2	+	1618511	1621384	6.215	6.995	18.52	18.835	21.2	12.665	22.2	5.46	Fun	FBgn0039223	CG5805
PS217	PS217-RB	2	2	+	1618514	1621384	6.215	6.995	18.52	18.835	21.2	12.665	22.2	5.46	Fun	FBgn0039223	CG5805
PS218	PS218-RA	2	2	-	1636089	1638246	16.21	18.585	6.28	6.935	35.015	55.175	17.06	2.98	Fun	FBgn0040600	CG13631
PS219	PS219-RA	2	2	+	1643151	1648204	6.125	7.19	2.375	2.97	3.205	13.545	0	0.28	Fun	FBgn0015591	AstA
PS219	PS219-RB	2	2	+	1643151	1648209	6.125	7.19	2.375	2.97	3.205	13.545	0	0.28	Fun	FBgn0015591	AstA
PS220	PS220-RA	2	2	-	1647960	1655076	2.22	4.775	2.35	9.33	32.035	7.03	34.15	5.54	Fun	FBgn0000140	asp
PS221	PS221-RA	2	2	-	1655501	1656526	1.23	3.345	0.325	1.035	0.28	2.785	0	2.11	Dis	FBgn0003719	tld
PS222	PS222-RA	2	2	-	1660256	1688433	9.245	12.89	19.59	14.155	3.875	3.885	0.3	0.915	Fun	FBgn0004885	tok
PS222	PS222-RB	2	2	-	1660265	1688435	9.245	12.89	19.59	14.155	3.875	3.885	0.3	0.915	Fun	FBgn0004885	tok
PS223	PS223-RA	2	2	+	1689339	1690839	29.085	41.47	49.405	66.845	42.985	84.025	32.52	124.565	Fun	FBgn0039219	CG13630
PS224	PS224-RA	2	2	-	1690763	1691263	52.26	76.7	113.11	117.08	136.565	78.505	136.23	121.33	Fun	FBgn0039218	Rpb10
PS225	PS225-RA	2	2	-	1691668	1696358	0.035	0.55	3.67	1.48	0.03	0.125	0	0.015	Fun	FBgn0039217	CG13627
PS226	PS226-RA	2	2	-	1697265	1728060	2.71	3.75	3.31	1.11	5.46	19.86	0.15	0.575	Fun	FBgn0003429	slo
PS226	PS226-RB	2	2	-	1697265	1742594	2.71	3.75	3.31	1.11	5.46	19.86	0.15	0.575	Fun	FBgn0003429	slo
PS226	PS226-RC	2	2	-	1697318	1710147	2.71	3.75	3.31	1.11	5.46	19.86	0.15	0.575	Fun	FBgn0003429	slo
PS226	PS226-RD	2	2	-	1697318	1742585	2.71	3.75	3.31	1.11	5.46	19.86	0.15	0.575	Fun	FBgn0003429	slo
PS226	PS226-RE	2	2	-	1700734	1728060	2.71	3.75	3.31	1.11	5.46	19.86	0.15	0.575	Fun	FBgn0003429	slo
PS226	PS226-RF	2	2	-	1700985	1744615	2.71	3.75	3.31	1.11	5.46	19.86	0.15	0.575	Fun	FBgn0003429	slo
PS227	PS227-RA	2	2	+	1750606	1752656	11.725	17.285	10.04	28.925	28.445	49.36	22.45	64.31	Fun	FBgn0020018	Ppox
PS228	PS228-RA	2	2	-	1752164	1757180	4.535	6.14	6.7	8.95	21.91	14.865	22.61	15.21	Fun	FBgn0039215	CG6695
PS228	PS228-RB	2	2	-	1752229	1757186	4.535	6.14	6.7	8.95	21.91	14.865	22.61	15.21	Fun	FBgn0039215	CG6695
PS228	PS228-RC	2	2	-	1752975	1757186	4.535	6.14	6.7	8.95	21.91	14.865	22.61	15.21	Fun	FBgn0039215	CG6695
PS229	PS229-RA	2	2	+	1757584	1760410	0.56	1.24	2.565	2.41	0.275	2.905	0.14	6.08	Fun	FBgn0051125	CG31125
PS230	PS230-RA	2	2	-	1759672	1762960	16.825	20.49	27.455	28.555	16.22	15.15	12.56	7.165	Fun	FBgn0000139	ash2
PS230	PS230-RB	2	2	-	1759672	1763205	16.825	20.49	27.455	28.555	16.22	15.15	12.56	7.165	Fun	FBgn0000139	ash2
PS231	PS231-RA	2	2	+	1763540	1779777	2.125	4.135	6.535	11.105	7.965	24.77	7.935	55.54	Fun	FBgn0039214	puf
PS231	PS231-RB	2	2	+	1763709	1778882	2.125	4.135	6.535	11.105	7.965	24.77	7.935	55.54	Fun	FBgn0039214	puf
PS231	PS231-RC	2	2	+	1763709	1780624	2.125	4.135	6.535	11.105	7.965	24.77	7.935	55.54	Fun	FBgn0039214	puf
PS231	PS231-RD	2	2	+	1765306	1779788	2.125	4.135	6.535	11.105	7.965	24.77	7.935	55.54	Fun	FBgn0039214	puf
PS232	PS232-RA	2	2	-	1779888	1789566	39.06	43.52	40.625	49.865	62.83	101.255	48.155	73.805	Fun	FBgn0039213	atl
PS232	PS232-RB	2	2	-	1779922	1783812	39.06	43.52	40.625	49.865	62.83	101.255	48.155	73.805	Fun	FBgn0039213	atl
PS232	PS232-RC	2	2	-	1779922	1787234	39.06	43.52	40.625	49.865	62.83	101.255	48.155	73.805	Fun	FBgn0039213	atl
PS233	PS233-RA	2	2	+	1783545	1788227	5.585	7.23	8.385	7.885	2.085	3.6	1.26	4.535	Fun	FBgn0046685	Wsck
PS234	PS234-RA	2	2	-	1789638	1792449	0.05	0.08	0.195	0.225	0.86	1.05	0.37	0.285	Fun	FBgn0043791	phu
PS235	PS235-RA	2	2	+	1815930	1824474	0.315	0.165	0.7	0.39	0.64	2.995	0	0.025	Dis	FBgn0037698	CG16779
PS235	PS235-RB	2	2	+	1815930	1824474	0.315	0.165	0.7	0.39	0.64	2.995	0	0.025	Dis	FBgn0037698	CG16779
PS236	PS236-RA	2	2	+	1824950	1827870	0.23	0.265	3.4	4.125	0.3	0.775	0	0.06	Fun
PS237	PS237-RA	2	2	+	1829129	1835665	2.53	2.975	3.87	3.56	99.79	4.135	70.105	1.125	Fun	FBgn0039644	rdog
PS238	PS238-RA	2	2	-	1841055	1862980	1.165	1.695	15.2	16.925	4.565	22.765	0.12	0.085	Fun	FBgn0039647	jus
PS238	PS238-RB	2	2	-	1841055	1862980	1.165	1.695	15.2	16.925	4.565	22.765	0.12	0.085	Fun	FBgn0039647	jus
PS238	PS238-RC	2	2	-	1841055	1862980	1.165	1.695	15.2	16.925	4.565	22.765	0.12	0.085	Fun	FBgn0039647	jus
PS239	PS239-RA	2	2	-	1867612	1870975	1.765	1.66	1.795	1.6	2.615	1.79	1.08	0.835	Fun	FBgn0039650	Mesh1
PS240	PS240-RA	2	2	+	1868076	1870087	35.375	93.165	134.96	103.67	143.385	22.215	105.05	8.88	Fun	FBgn0014427	CG11899
PS240	PS240-RB	2	2	+	1868449	1870087	35.375	93.165	134.96	103.67	143.385	22.215	105.05	8.88	Fun	FBgn0014427	CG11899
PS241	PS241-RA	2	2	-	1871491	1872829	0.115	10.755	0.485	24.295	0.655	19.4	0.435	23.56	Dis	FBgn0039651	Cyt-c1L
PS242	PS242-RA	2	2	-	1873845	1874798	0	0.135	1.695	2.675	0.045	0.385	0.05	0.055	Fun
PS243	PS243-RA	2	2	-	1890759	1894039	3.445	6.67	9.805	11.805	21.59	5.22	22.225	4.2	Fun	FBgn0039654	Brd8
PS244	PS244-RA	2	2	+	1893583	1894981	106.555	103.195	78.395	70.68	135.215	92.295	249.195	15.035	Fun	FBgn0062442	Cisd2
PS245	PS245-RA	2	2	-	1894982	1896953	1431.59	1586.44	1257.14	1157.81	1320.95	256.83	1182.87	87.875	Fun	FBgn0029176	eEF1gamma
PS246	PS246-RA	2	2	+	1895128	1896630	2.04	3.32	3.285	4.995	0.39	0.1	0.365	0.07	Fun
PS247	PS247-RA	2	2	+	1897538	1904525	3.92	6.075	10.485	15.235	23.025	52.88	33.61	74.955	Fun	FBgn0028476	Usp1
PS247	PS247-RB	2	2	+	1897563	1904520	3.92	6.075	10.485	15.235	23.025	52.88	33.61	74.955	Fun	FBgn0028476	Usp1
PS247	PS247-RC	2	2	+	1897563	1904525	3.92	6.075	10.485	15.235	23.025	52.88	33.61	74.955	Fun	FBgn0028476	Usp1
PS247	PS247-RD	2	2	+	1898735	1904525	3.92	6.075	10.485	15.235	23.025	52.88	33.61	74.955	Fun	FBgn0028476	Usp1
PS248	PS248-RA	2	2	-	1903240	1907943	0.01	0	0.01	0.04	0	7.635	0	4.06	Fun	FBgn0051445	CG31445
PS248	PS248-RB	2	2	-	1903240	1907943	0.01	0	0.01	0.04	0	7.635	0	4.06	Fun	FBgn0051445	CG31445
PS249	PS249-RA	2	2	-	1908112	1914598	33.77	43.365	196.29	133.85	15.1	68.23	8.78	37.68	Fun	FBgn0263236	SP1029
PS250	PS250-RA	2	2	-	1917231	1921308	5.4	6.445	94.47	74.77	37.21	0.16	61.45	0.105	Fun	FBgn0003525	stg
PS251	PS251-RA	2	2	+	1922999	1944693	0	0	0.005	0	0	0	0	0	Sil
PS252	PS252-RA	2	2	-	1995392	2000080	47.69	73.03	163.32	172.525	93.75	115.605	65.085	82.515	Fun	FBgn0015622	Cnx99A
PS252	PS252-RB	2	2	-	1995392	2000877	47.69	73.03	163.32	172.525	93.75	115.605	65.085	82.515	Fun	FBgn0015622	Cnx99A
PS252	PS252-RC	2	2	-	1995392	2000915	47.69	73.03	163.32	172.525	93.75	115.605	65.085	82.515	Fun	FBgn0015622	Cnx99A
PS252	PS252-RD	2	2	-	1995432	2000080	47.69	73.03	163.32	172.525	93.75	115.605	65.085	82.515	Fun	FBgn0015622	Cnx99A
PS253	PS253-RA	2	2	-	2000970	2024868	0	0.01	0	0	0	0.02	0	0.075	Sil	FBgn0038733	CG11407
PS254	PS254-RA	2	2	-	2030675	2033035	0	0	0.095	0.245	0	28.54	0	82.88	Fun
PS255	PS255-RA	2	2	-	2033336	2033765	0	2.485	4.8	3.06	0	0	0	0.325	Fun	FBgn0085358	Diedel3
PS256	PS256-RA	2	2	+	2062007	2176196	3.655	6.255	28.145	36.08	9.92	27.68	6.83	28.54	Dis	FBgn0004369	Ptp99A
PS256	PS256-RB	2	2	+	2062180	2176196	3.655	6.255	28.145	36.08	9.92	27.68	6.83	28.54	Dis	FBgn0004369	Ptp99A
PS256	PS256-RC	2	2	+	2142295	2176184	3.655	6.255	28.145	36.08	9.92	27.68	6.83	28.54	Dis	FBgn0004369	Ptp99A
PS256	PS256-RD	2	2	+	2142364	2176239	3.655	6.255	28.145	36.08	9.92	27.68	6.83	28.54	Dis	FBgn0004369	Ptp99A
PS256	PS256-RE	2	2	+	2167605	2176239	3.655	6.255	28.145	36.08	9.92	27.68	6.83	28.54	Dis	FBgn0004369	Ptp99A
PS257	PS257-RA	2	2	-	2175962	2178335	0.685	0.81	2.085	1.73	4.885	1.375	6.255	0.675	Fun	FBgn0039663	CG2321
PS258	PS258-RA	2	2	+	2178412	2179523	8.06	8.02	7.27	7.155	19.915	6.985	29.125	3.63	Fun	FBgn0039664	CG2006
PS259	PS259-RA	2	2	-	2179393	2180080	103.92	121.45	138.26	149.725	165.905	175.705	254.395	171.045	Fun	FBgn0040623	Spase12
PS260	PS260-RA	2	2	-	2180990	2182637	11.985	15.475	46.41	41.39	19.415	7.645	21.115	5.76	Fun	FBgn0039665	CG2310
PS260	PS260-RB	2	2	-	2180990	2182803	11.985	15.475	46.41	41.39	19.415	7.645	21.115	5.76	Fun	FBgn0039665	CG2310
PS260	PS260-RC	2	2	-	2180990	2182803	11.985	15.475	46.41	41.39	19.415	7.645	21.115	5.76	Fun	FBgn0039665	CG2310
PS260	PS260-RD	2	2	-	2180990	2182803	11.985	15.475	46.41	41.39	19.415	7.645	21.115	5.76	Fun	FBgn0039665	CG2310
PS261	PS261-RA	2	2	+	2183337	2187666	15.145	12.52	1.88	1.605	15.76	45.16	0.145	0.605	Fun	FBgn0039667	FipoQ
PS261	PS261-RB	2	2	+	2183337	2187666	15.145	12.52	1.88	1.605	15.76	45.16	0.145	0.605	Fun	FBgn0039667	FipoQ
PS261	PS261-RC	2	2	+	2185038	2187908	15.145	12.52	1.88	1.605	15.76	45.16	0.145	0.605	Fun	FBgn0039667	FipoQ
PS262	PS262-RA	2	2	-	2187528	2192353	8.54	12.66	11.46	20.805	26.62	84.72	32.365	105.265	Fun	FBgn0039668	Trc8
PS262	PS262-RB	2	2	-	2187528	2194671	8.54	12.66	11.46	20.805	26.62	84.72	32.365	105.265	Fun	FBgn0039668	Trc8
PS262	PS262-RC	2	2	-	2187535	2196899	8.54	12.66	11.46	20.805	26.62	84.72	32.365	105.265	Fun	FBgn0039668	Trc8
PS263	PS263-RA	2	2	+	2206533	2207488	1.08	12.005	0.075	54.005	0.045	50.87	0.155	191.925	Fun	FBgn0039669	ND-20L
PS263	PS263-RB	2	2	+	2206533	2207491	1.08	12.005	0.075	54.005	0.045	50.87	0.155	191.925	Fun	FBgn0039669	ND-20L
PS264	PS264-RA	2	2	-	2227994	2240091	0	0.035	0.115	0.22	0.015	0	0.015	0	Sil
PS265	PS265-RA	2	2	+	2252246	2262141	5.46	8.025	29.365	31.2	1.15	3.05	0	0.08	Fun	FBgn0000492	Dr
PS266	PS266-RA	2	2	-	2274745	2276033	0	0.08	0	0.765	0	2.055	0	4.325	Fun
PS267	PS267-RA	2	2	-	2285529	2286326	69.015	111.32	0.095	0.205	0.065	0	0	0	Fun	FBgn0039670	CG7567
PS268	PS268-RA	2	2	-	2287367	2288193	98.085	144.575	0.145	0	0	0	0	0	Fun	FBgn0039671	CG11470
PS269	PS269-RA	2	2	-	2288508	2289369	226.655	219.965	0.905	0.295	0.17	1.145	0.13	1.695	Fun	FBgn0051041	CG31041
PS270	PS270-RA	2	2	+	2290363	2298385	37.485	44.73	74.33	77.225	106.415	43.91	94.86	24.605	Fun	FBgn0086361	alph
PS270	PS270-RB	2	2	+	2290363	2298396	37.485	44.73	74.33	77.225	106.415	43.91	94.86	24.605	Fun	FBgn0086361	alph
PS270	PS270-RC	2	2	+	2290363	2298396	37.485	44.73	74.33	77.225	106.415	43.91	94.86	24.605	Fun	FBgn0086361	alph
PS270	PS270-RD	2	2	+	2290616	2298396	37.485	44.73	74.33	77.225	106.415	43.91	94.86	24.605	Fun	FBgn0086361	alph
PS271	PS271-RA	2	2	+	2318127	2320310	40.16	33.395	25.36	30.725	43.47	55.28	38.515	54.32	Fun	FBgn0039674	CG1907
PS272	PS272-RA	2	2	-	2330441	2332788	0.375	0.385	1.25	1.48	0.335	1.605	0	0.225	Dis	FBgn0266137	Dop1R2
PS273	PS273-RA	2	2	+	2339618	2342016	0	0.145	0	0.75	0.015	3.235	0	8.4	Fun
PS274	PS274-RA	2	2	+	2353532	2362876	0.03	0.11	0.395	0.6	0.1	0.225	0.065	0.105	Sil	FBgn0039675	ppk21
PS275	PS275-RA	2	2	-	2362952	2365051	0.055	0.105	0.17	0.03	0.29	0.73	0.02	0.575	Sil	FBgn0039676	ppk20
PS276	PS276-RA	2	2	+	2365312	2367279	0.09	0.165	0.445	0.455	0.07	0.57	0.02	0.9	Sil	FBgn0039677	ppk30
PS277	PS277-RA	2	2	-	2367352	2371894	20.33	28.85	32.485	42.43	55.805	17.205	86.26	17.1	Fun	FBgn0025457	Bub3
PS278	PS278-RA	2	2	+	2367778	2368467	197.12	182.76	146.29	175.05	0.175	223.685	0.085	560.125	Fun	FBgn0039678	Obp99a
PS277	PS277-RB	2	2	-	2369980	2371580	20.33	28.85	32.485	42.43	55.805	17.205	86.26	17.1	Fun	FBgn0025457	Bub3
PS279	PS279-RA	2	2	-	2372452	2374424	3.425	5.115	5.485	5.425	2.87	8.66	0.58	2.57	Fun	FBgn0039681	CG7582
PS280	PS280-RA	2	2	+	2374951	2378746	1.785	2.115	3.595	3.26	2.205	9.765	0.03	0	Fun	FBgn0013972	Gycalpha99B
PS281	PS281-RA	2	2	-	2378251	2379300	1151.68	1027.02	817.175	594.51	117.23	186.215	1.915	53.615	Fun	FBgn0039682	Obp99c
PS282	PS282-RA	2	2	+	2385012	2390147	0.78	1.06	0.51	0.37	0.02	0.145	0	0	Fun	FBgn0039683	dmrt99B
PS283	PS283-RA	2	2	+	2408007	2408945	15.025	31.7	52.78	35.11	0.045	0.15	0	0.25	Fun	FBgn0039684	Obp99d
PS284	PS284-RA	2	2	-	2408450	2409075	13312.1	22898.3	13918.3	15017.1	3.545	59.875	0.165	5.455	Fun	FBgn0039685	Obp99b
PS285	PS285-RA	2	2	+	2412671	2415799	0.145	0.515	0.305	0.7	0.955	3.28	0	0.335	Fun	FBgn0039686	CG15506
PS286	PS286-RA	2	2	+	2415964	2417528	74.04	102.735	108.23	100.315	37.72	57.865	20.645	44.49	Fun	FBgn0024841	Pcd
PS286	PS286-RB	2	2	+	2415964	2417530	74.04	102.735	108.23	100.315	37.72	57.865	20.645	44.49	Fun	FBgn0024841	Pcd
PS286	PS286-RC	2	2	+	2416572	2417530	74.04	102.735	108.23	100.315	37.72	57.865	20.645	44.49	Fun	FBgn0024841	Pcd
PS286	PS286-RD	2	2	+	2416572	2417530	74.04	102.735	108.23	100.315	37.72	57.865	20.645	44.49	Fun	FBgn0024841	Pcd
PS287	PS287-RA	2	2	-	2416903	2418278	8.01	9.885	7.105	10.135	35.02	4.085	128.005	14.78	Fun	FBgn0039687	Naa40
PS288	PS288-RA	2	2	+	2418698	2421014	9.17	16.335	13.78	23.355	32.57	87.55	65.81	417.3	Fun	FBgn0039688	Kul
PS288	PS288-RB	2	2	+	2418968	2431445	9.17	16.335	13.78	23.355	32.57	87.55	65.81	417.3	Fun	FBgn0039688	Kul
PS289	PS289-RA	2	2	-	2419023	2419902	0.065	0.31	0.27	0.535	0	21.045	0	1.125	Dis	FBgn0037650	CG11977
PS290	PS290-RA	2	2	-	2430755	2432746	6.515	8.98	5.21	11.265	35.3	20.585	37.74	18.125	Fun	FBgn0027583	CG7601
PS291	PS291-RA	2	2	+	2432755	2436122	35.06	32.87	19.665	16.61	23.21	22.05	20.735	3.19	Fun	FBgn0039690	Gnpnat
PS291	PS291-RB	2	2	+	2433955	2436122	35.06	32.87	19.665	16.61	23.21	22.05	20.735	3.19	Fun	FBgn0039690	Gnpnat
PS292	PS292-RA	2	2	-	2435850	2439091	2.505	4.01	5.785	6.77	15.085	6.41	17.055	5.6	Fun	FBgn0027518	Wdr24
PS293	PS293-RA	2	2	+	2439086	2440655	7.805	10.965	13.375	14.705	19.68	5.61	19.405	4.035	Fun	FBgn0027784	Prp18
PS294	PS294-RA	2	2	-	2440191	2441568	19.28	23.66	25.305	33.895	44.875	26	86.13	59.34	Fun	FBgn0015781	P5cr
PS295	PS295-RA	2	2	+	2441579	2444526	8.315	10.63	12.52	13.97	26.24	11.45	61.765	13.81	Fun	FBgn0260779	GatA
PS296	PS296-RA	2	2	-	2442638	2443365	130.675	119.33	76.575	92.695	214.075	349.35	141.665	60.57	Fun	FBgn0027785	NP15.6
PS297	PS297-RA	2	2	-	2444508	2450664	2.385	1.535	4.79	3.225	0.5	2.18	0.175	0.725	Fun	FBgn0038674	CG14285
PS297	PS297-RB	2	2	-	2444542	2449764	2.385	1.535	4.79	3.225	0.5	2.18	0.175	0.725	Fun	FBgn0038674	CG14285
PS298	PS298-RA	2	2	+	2460850	2464857	7.085	8.685	1.425	2.885	2.74	9.14	0	2.07	Fun	FBgn0028374	Hug
PS299	PS299-RA	2	2	-	2487359	2493714	0.98	0.84	0.07	0.42	0.265	4.31	0.375	6.215	Fun	FBgn0038063	Octbeta2R
PS300	PS300-RA	2	2	-	2554279	2554843	0	0	0	0	0	3.055	0	0	Dis
PS301	PS301-RA	2	2	-	2559869	2563739	227.3	213.07	59.925	67.4	216.4	190.725	109.02	62.325	Fun	FBgn0005671	Vha55
PS301	PS301-RB	2	2	-	2559914	2563727	227.3	213.07	59.925	67.4	216.4	190.725	109.02	62.325	Fun	FBgn0005671	Vha55
PS301	PS301-RC	2	2	-	2559914	2563736	227.3	213.07	59.925	67.4	216.4	190.725	109.02	62.325	Fun	FBgn0005671	Vha55
PS302	PS302-RA	2	2	+	2564991	2567140	32.835	46.995	67.125	64.1	93.825	91.45	67.97	152.93	Fun	FBgn0038065	Snx3
PS303	PS303-RA	2	2	+	2567180	2569947	7.325	7.78	7.35	8.855	23.75	84.18	23.625	7.68	Fun	FBgn0260444	Not10
PS304	PS304-RA	2	2	-	2568631	2569604	0	0	0	0	0	2.01	0	0.53	Fun
PS303	PS303-RB	2	2	+	2569695	2571536	7.325	7.78	7.35	8.855	23.75	84.18	23.625	7.68	Fun	FBgn0260444	Not10
PS305	PS305-RA	2	2	+	2573488	2576405	0.05	0.1	1.3	1.325	0.07	2.47	0.07	0.195	Dis	FBgn0038814	CG15923
PS306	PS306-RA	2	2	-	2574627	2596853	4.645	6.915	21.335	20.105	20.895	7.5	21.795	9.24	Fun	FBgn0023097	bon
PS306	PS306-RB	2	2	-	2575364	2596845	4.645	6.915	21.335	20.105	20.895	7.5	21.795	9.24	Fun	FBgn0023097	bon
PS306	PS306-RC	2	2	-	2575364	2596853	4.645	6.915	21.335	20.105	20.895	7.5	21.795	9.24	Fun	FBgn0023097	bon
PS306	PS306-RD	2	2	-	2575405	2596853	4.645	6.915	21.335	20.105	20.895	7.5	21.795	9.24	Fun	FBgn0023097	bon
PS306	PS306-RE	2	2	-	2575406	2596845	4.645	6.915	21.335	20.105	20.895	7.5	21.795	9.24	Fun	FBgn0023097	bon
PS306	PS306-RF	2	2	-	2575422	2579921	4.645	6.915	21.335	20.105	20.895	7.5	21.795	9.24	Fun	FBgn0023097	bon
PS307	PS307-RA	2	2	+	2596443	2599132	4.435	6.69	4.45	8.09	22.335	8.08	27.86	7.675	Fun	FBgn0038811	Pus1
PS307	PS307-RB	2	2	+	2596443	2599198	4.435	6.69	4.45	8.09	22.335	8.08	27.86	7.675	Fun	FBgn0038811	Pus1
PS307	PS307-RC	2	2	+	2596586	2598730	4.435	6.69	4.45	8.09	22.335	8.08	27.86	7.675	Fun	FBgn0038811	Pus1
PS307	PS307-RD	2	2	+	2596586	2598730	4.435	6.69	4.45	8.09	22.335	8.08	27.86	7.675	Fun	FBgn0038811	Pus1
PS307	PS307-RE	2	2	+	2596656	2598742	4.435	6.69	4.45	8.09	22.335	8.08	27.86	7.675	Fun	FBgn0038811	Pus1
PS308	PS308-RA	2	2	-	2598667	2601025	31.37	37.385	30.965	37.63	57.055	27.57	62.29	24.77	Fun	FBgn0038810	Srp72
PS309	PS309-RA	2	2	+	2601219	2603262	30.715	54.055	77.495	76.4	78.11	28.6	80.925	18.245	Fun	FBgn0014029	44441
PS310	PS310-RA	2	2	+	2603340	2606892	18.65	25.275	29.085	28.975	84.92	27.78	95.805	20.675	Fun	FBgn0038809	CG16953
PS310	PS310-RB	2	2	+	2603341	2608555	18.65	25.275	29.085	28.975	84.92	27.78	95.805	20.675	Fun	FBgn0038809	CG16953
PS310	PS310-RC	2	2	+	2607582	2608369	18.65	25.275	29.085	28.975	84.92	27.78	95.805	20.675	Fun	FBgn0038809	CG16953
PS311	PS311-RA	2	2	-	2608303	2609340	42.365	62.82	78.2	100.72	102.355	71.315	66.505	68.85	Fun	FBgn0038808	Srp14
PS311	PS311-RB	2	2	-	2608303	2609340	42.365	62.82	78.2	100.72	102.355	71.315	66.505	68.85	Fun	FBgn0038808	Srp14
PS312	PS312-RA	2	2	-	2609864	2613088	3.365	4.555	5.06	6.62	14.17	3.855	26.705	4.765	Fun	FBgn0038806	CG5412
PS313	PS313-RA	2	2	+	2609960	2611888	54.81	76.505	117.955	132.34	159.505	70.355	142.68	53.845	Fun	FBgn0023212	EloB
PS314	PS314-RA	2	2	+	2612888	2614309	14.575	20.15	22.35	32.255	57.12	27.075	59.65	17.7	Dis	FBgn0038805	TFAM
PS314	PS314-RB	2	2	+	2612987	2614307	14.575	20.15	22.35	32.255	57.12	27.075	59.65	17.7	Dis	FBgn0038805	TFAM
PS314	PS314-RC	2	2	+	2612998	2614309	14.575	20.15	22.35	32.255	57.12	27.075	59.65	17.7	Dis	FBgn0038805	TFAM
PS315	PS315-RA	2	2	-	2616470	2619561	1.425	2.25	7.775	9.41	36.485	18.945	49.245	35.46	Fun	FBgn0038803	CG5191
PS316	PS316-RA	2	2	+	2649442	2652248	3.29	4.62	14.96	13.47	16.86	11.81	13.515	4.95	NA	FBgn0039234	Nct
PS317	PS317-RA	2	2	-	2650785	2652272	1.575	2.295	8.725	5.95	8.815	1.095	4.65	0.295	Dis	FBgn0051119	HDAC11
PS318	PS318-RA	2	2	-	2653747	2654311	0	0	0	0.15	0	119.265	0	342.065	Fun	FBgn0262010	CG42828
PS318	PS318-RB	2	2	-	2653747	2654311	0	0	0	0.15	0	119.265	0	342.065	Fun	FBgn0262010	CG42828
PS319	PS319-RA	2	2	-	2655001	2655722	0	0	0	0	0	120.95	0	1244.01	Fun	FBgn0262009	CG42827
PS320	PS320-RA	2	2	-	2656763	2657700	0	0	0	0	0.05	17.88	0.05	51.11	Fun	FBgn0262009	CG42827
PS321	PS321-RA	2	2	+	2667899	2675331	0	1.24	0.115	10.965	0	17.04	0	25.02	Fun	FBgn0261998	CG42816
PS321	PS321-RB	2	2	+	2667899	2675331	0	1.24	0.115	10.965	0	17.04	0	25.02	Fun	FBgn0261998	CG42816
PS321	PS321-RC	2	2	+	2667899	2675332	0	1.24	0.115	10.965	0	17.04	0	25.02	Fun	FBgn0261998	CG42816
PS322	PS322-RA	2	2	+	2675505	2676967	0	0	0.16	0.18	0	15.385	0	93.3	Fun	FBgn0262009	CG42827
PS323	PS323-RA	2	2	+	2678000	2678466	0	0	0	0	0	197.465	0	705.485	Fun	FBgn0262009	CG42827
PS324	PS324-RA	2	2	+	2678970	2679453	0	0	0	0	0	30.01	0	97.36	Dis	FBgn0262009	CG42827
PS325	PS325-RA	2	2	+	2682206	2682648	0	0	0	0.23	0	65.1	0	41.615	Fun	FBgn0039077	CG17380
PS326	PS326-RA	2	2	+	2682825	2683296	0	0	1.07	0	0	99.445	0	406.015	Fun	FBgn0262010	CG42828
PS327	PS327-RA	2	2	-	2684920	2694976	0.64	0.675	15.555	12.55	0.715	1.715	0.165	0.53	Fun	FBgn0039075	CG4393
PS328	PS328-RA	2	2	-	2698080	2706100	0	0	0	0	0	0.04	0	0.055	Sil	FBgn0051515	CG31515
PS329	PS329-RA	2	2	+	2711674	2712746	0	0.125	0.47	0.32	0.045	113.6	0	191.715	Fun	FBgn0051296	CG31296
PS330	PS330-RA	2	2	+	2712801	2717521	0	0	0.1	0.035	0	0.335	0	0.82	Sil	FBgn0259194	Ir94e
PS331	PS331-RA	2	2	-	2718213	2721881	0.27	1.73	1.945	1.09	0.08	0.725	0	0.535	Dis	FBgn0039078	CG4374
PS332	PS332-RA	2	2	-	2791493	2792450	0	0	0.065	0	0	59	0	1.66	Dis	FBgn0051265	CG31265
PS333	PS333-RA	2	2	+	2797066	2803194	0	0	0.015	0	0	0.03	0	0.025	Sil	FBgn0039080	Ir94h
PS334	PS334-RA	2	2	-	2822670	2823498	0	1.755	0	14.715	0	28.935	0	59.57	Fun	FBgn0085318	CG34289
PS335	PS335-RA	2	2	-	2831685	2835238	36.775	29.665	3.105	6.45	9.13	42.995	0.055	51.4	Fun	FBgn0039081	Irk2
PS335	PS335-RB	2	2	-	2831685	2836412	36.775	29.665	3.105	6.45	9.13	42.995	0.055	51.4	Fun	FBgn0039081	Irk2
PS335	PS335-RC	2	2	-	2831691	2838593	36.775	29.665	3.105	6.45	9.13	42.995	0.055	51.4	Fun	FBgn0039081	Irk2
PS335	PS335-RD	2	2	-	2831691	2838593	36.775	29.665	3.105	6.45	9.13	42.995	0.055	51.4	Fun	FBgn0039081	Irk2
PS336	PS336-RA	2	2	-	2839388	2844541	0.705	0.515	0.35	0.26	2.81	6.465	0.015	0.245	Fun	FBgn0039084	CG10175
PS336	PS336-RB	2	2	-	2839388	2848654	0.705	0.515	0.35	0.26	2.81	6.465	0.015	0.245	Fun	FBgn0039084	CG10175
PS336	PS336-RC	2	2	-	2839404	2846246	0.705	0.515	0.35	0.26	2.81	6.465	0.015	0.245	Fun	FBgn0039084	CG10175
PS337	PS337-RA	2	2	-	2851238	2852954	2.995	3.385	0.25	0.495	1.105	1.115	0	0	Fun	FBgn0039087	Ugt303B2
PS338	PS338-RA	2	2	-	2871412	2873627	0	2.215	0.015	11.785	0	106.86	0	147.085	Fun
PS339	PS339-RA	2	2	+	2881868	2894998	0.335	0.365	7.505	5.545	0.48	2.81	0	0.025	Fun	FBgn0039089	beat-IV
PS340	PS340-RA	2	2	-	2902474	2903681	1.135	1.59	0	0.19	1.745	2.505	0	0	Dis	FBgn0039092	CG16723
PS341	PS341-RA	2	2	-	2904708	2905044	1.935	0.535	0	0	0	0.415	0	0	Dis	FBgn0053337	CG33337
PS342	PS342-RA	2	2	-	2905593	2918184	15.85	13.855	0	0.055	15.355	20.61	0	0.11	Fun	FBgn0033792	CG13325
PS342	PS342-RB	2	2	-	2908336	2918182	15.85	13.855	0	0.055	15.355	20.61	0	0.11	Fun	FBgn0033792	CG13325
PS342	PS342-RC	2	2	-	2908590	2912933	15.85	13.855	0	0.055	15.355	20.61	0	0.11	Fun	FBgn0033792	CG13325
PS342	PS342-RD	2	2	-	2910120	2912983	15.85	13.855	0	0.055	15.355	20.61	0	0.11	Fun	FBgn0033792	CG13325
PS342	PS342-RE	2	2	-	2910120	2918182	15.85	13.855	0	0.055	15.355	20.61	0	0.11	Fun	FBgn0033792	CG13325
PS342	PS342-RF	2	2	-	2910120	2918182	15.85	13.855	0	0.055	15.355	20.61	0	0.11	Fun	FBgn0033792	CG13325
PS342	PS342-RG	2	2	-	2910120	2918184	15.85	13.855	0	0.055	15.355	20.61	0	0.11	Fun	FBgn0033792	CG13325
PS342	PS342-RH	2	2	-	2910121	2916261	15.85	13.855	0	0.055	15.355	20.61	0	0.11	Fun	FBgn0033792	CG13325
PS342	PS342-RI	2	2	-	2910121	2916951	15.85	13.855	0	0.055	15.355	20.61	0	0.11	Fun	FBgn0033792	CG13325
PS342	PS342-RJ	2	2	-	2910121	2918182	15.85	13.855	0	0.055	15.355	20.61	0	0.11	Fun	FBgn0033792	CG13325
PS343	PS343-RA	2	2	-	2922429	2925744	12.05	11.01	3.88	4.08	15.675	5.745	15.58	0.65	Fun	FBgn0039094	CG10184
PS344	PS344-RA	2	2	-	2925931	2997755	8.16	8.1	9.345	5.975	20.53	51.38	3.14	1.82	Dis	FBgn0051145	CG31145
PS344	PS344-RB	2	2	-	2925933	2997753	8.16	8.1	9.345	5.975	20.53	51.38	3.14	1.82	Dis	FBgn0051145	CG31145
PS344	PS344-RC	2	2	-	2925933	2997753	8.16	8.1	9.345	5.975	20.53	51.38	3.14	1.82	Dis	FBgn0051145	CG31145
PS344	PS344-RD	2	2	-	2925934	2997753	8.16	8.1	9.345	5.975	20.53	51.38	3.14	1.82	Dis	FBgn0051145	CG31145
PS345	PS345-RA	2	2	+	2973245	2974680	0	1.95	0	8.54	0	7.815	0	9.53	Dis	FBgn0000405	CycB
PS346	PS346-RA	2	2	-	3005534	3006397	0.075	0.07	0.145	0.34	0	0.07	0	0.27	Sil	FBgn0035012	CG13590
PS347	PS347-RA	2	2	+	3006899	3007880	11.255	8.02	11.65	12.06	40.3	10.595	38.175	16.36	Fun	FBgn0039098	GILT3
PS348	PS348-RA	2	2	+	3008093	3009918	12.745	26.08	22.95	27.28	3.59	94.81	1.59	442.115	Fun	FBgn0039099	GILT2
PS349	PS349-RA	2	2	+	3010104	3012362	67.915	81.53	77.965	78.42	180.39	41.62	144.41	16.55	Fun	FBgn0040227	eIF3d1
PS350	PS350-RA	2	2	+	3012428	3013784	0.04	0.075	0	0	0.095	7.77	0.03	12.82	Fun	FBgn0039102	SPE
PS351	PS351-RA	2	2	+	3013968	3015615	119.46	100.19	151.45	120.46	18.885	13.51	0.735	1.925	Fun	FBgn0039102	SPE
PS352	PS352-RA	2	2	-	3015517	3021393	4.735	12.49	10.99	58.385	161.505	191.185	121.335	207.075	Fun	FBgn0027512	CG10254
PS352	PS352-RB	2	2	-	3015517	3022482	4.735	12.49	10.99	58.385	161.505	191.185	121.335	207.075	Fun	FBgn0027512	CG10254
PS352	PS352-RC	2	2	-	3015518	3022227	4.735	12.49	10.99	58.385	161.505	191.185	121.335	207.075	Fun	FBgn0027512	CG10254
PS352	PS352-RD	2	2	-	3015518	3022482	4.735	12.49	10.99	58.385	161.505	191.185	121.335	207.075	Fun	FBgn0027512	CG10254
PS353	PS353-RA	2	2	-	3022628	3023727	0	35.17	0.04	161.685	0	964.315	0	2905.57	Fun	FBgn0039104	CG10252
PS354	PS354-RA	2	2	+	3023243	3024724	0	2.275	0.05	15.145	0.03	16.67	0	20.35	Fun	FBgn0029094	asf1
PS355	PS355-RA	2	2	-	3024330	3030629	0.27	1.105	0.34	3.64	1.755	24.67	0.72	101.42	Fun	FBgn0043005	prt
PS356	PS356-RA	2	2	+	3028089	3031043	42.415	21.245	0.135	0.92	1.25	5.445	0	5.425	Fun	FBgn0051148	Gba1a
PS357	PS357-RA	2	2	+	3031301	3038381	3.39	2.53	0.35	0.84	4.99	4.48	4.785	2.395	Fun	FBgn0039107	CG10300
PS358	PS358-RA	2	2	-	3038245	3044934	0.575	0.745	0.545	0.58	0.56	2.455	0.04	1.25	Fun	FBgn0002922	nau
PS359	PS359-RA	2	2	+	3050076	3058786	25.795	24.51	37.675	54.8	30.955	275.175	22.23	544.525	Fun	FBgn0039109	CG10365
PS359	PS359-RB	2	2	+	3050076	3058821	25.795	24.51	37.675	54.8	30.955	275.175	22.23	544.525	Fun	FBgn0039109	CG10365
PS359	PS359-RC	2	2	+	3055253	3058786	25.795	24.51	37.675	54.8	30.955	275.175	22.23	544.525	Fun	FBgn0039109	CG10365
PS360	PS360-RA	2	2	-	3058782	3060600	95.91	165.635	79.135	111.505	155.38	90.41	172.94	85.44	Fun	FBgn0028691	Rpn9
PS360	PS360-RB	2	2	-	3058785	3060326	95.91	165.635	79.135	111.505	155.38	90.41	172.94	85.44	Fun	FBgn0028691	Rpn9
PS361	PS361-RA	2	2	+	3060237	3061855	8.84	19.145	14.07	27.485	24.91	28.455	32.975	41.1	Fun	FBgn0027526	Ublcp1
PS362	PS362-RA	2	2	-	3061736	3066728	0.795	0.765	0.28	0.76	3.345	8.91	0.25	1.855	Fun	FBgn0039048	CG17111
PS363	PS363-RA	2	2	+	3067738	3069151	0	0	0	0	0	0	0	0	Sil-Dis	FBgn0052675	Tango5
PS364	PS364-RA	2	2	-	3071635	3111886	2.965	3.62	45.675	39.575	6.16	25.445	0	0.525	Fun	FBgn0039054	Cow
PS364	PS364-RB	2	2	-	3071635	3111886	2.965	3.62	45.675	39.575	6.16	25.445	0	0.525	Fun	FBgn0039054	Cow
PS364	PS364-RC	2	2	-	3071635	3111886	2.965	3.62	45.675	39.575	6.16	25.445	0	0.525	Fun	FBgn0039054	Cow
PS365	PS365-RA	2	2	+	3094381	3096176	62.315	36.15	25.255	18.81	47.165	46.67	25.185	3.595	Fun	FBgn0039049	CG6726
PS365	PS365-RB	2	2	+	3094381	3096182	62.315	36.15	25.255	18.81	47.165	46.67	25.185	3.595	Fun	FBgn0039049	CG6726
PS366	PS366-RA	2	2	+	3096356	3099646	10.915	7.05	1.125	0.655	7.605	7.715	5.395	0.095	Fun	FBgn0039049	CG6726
PS367	PS367-RA	2	2	-	3113046	3117308	4.02	6.95	22.08	21.02	28.21	9.275	28.44	4.66	Fun	FBgn0039055	Rassf
PS368	PS368-RA	2	2	+	3117984	3123690	5.04	5.855	10.575	9.485	32.58	6.69	34.33	3.15	Fun	FBgn0039056	CenB1A
PS368	PS368-RB	2	2	+	3118099	3123660	5.04	5.855	10.575	9.485	32.58	6.69	34.33	3.15	Fun	FBgn0039056	CenB1A
PS369	PS369-RA	2	2	-	3123218	3127727	1.815	4.44	5.88	14.915	17.13	19	28.885	26.575	Fun	FBgn0051365	CG31365
PS369	PS369-RB	2	2	-	3123287	3127727	1.815	4.44	5.88	14.915	17.13	19	28.885	26.575	Fun	FBgn0051365	CG31365
PS370	PS370-RA	2	2	+	3127597	3131512	91.84	132.575	66.43	77.285	101.83	56.015	85.375	33.91	Fun	FBgn0028692	Rpn2
PS370	PS370-RB	2	2	+	3127850	3131481	91.84	132.575	66.43	77.285	101.83	56.015	85.375	33.91	Fun	FBgn0028692	Rpn2
PS371	PS371-RA	2	2	-	3130597	3131447	2.51	2.985	4.53	5.82	2.425	1.49	1.05	0.405	Fun
PS372	PS372-RA	2	2	+	3132510	3136779	30.665	33.735	50.295	40.255	32.42	17.65	18.45	2.895	Fun	FBgn0037697	GstZ2
PS372	PS372-RB	2	2	+	3134034	3138059	30.665	33.735	50.295	40.255	32.42	17.65	18.45	2.895	Fun	FBgn0037697	GstZ2
PS372	PS372-RC	2	2	+	3136960	3138075	30.665	33.735	50.295	40.255	32.42	17.65	18.45	2.895	Fun	FBgn0037697	GstZ2
PS373	PS373-RA	2	2	-	3138069	3167625	32.875	26.74	31.66	37.16	19.095	71.175	1.795	15.48	Fun	FBgn0261552	ps
PS373	PS373-RB	2	2	-	3138069	3178415	32.875	26.74	31.66	37.16	19.095	71.175	1.795	15.48	Fun	FBgn0261552	ps
PS373	PS373-RC	2	2	-	3138069	3178415	32.875	26.74	31.66	37.16	19.095	71.175	1.795	15.48	Fun	FBgn0261552	ps
PS373	PS373-RD	2	2	-	3138069	3180032	32.875	26.74	31.66	37.16	19.095	71.175	1.795	15.48	Fun	FBgn0261552	ps
PS373	PS373-RE	2	2	-	3138069	3180045	32.875	26.74	31.66	37.16	19.095	71.175	1.795	15.48	Fun	FBgn0261552	ps
PS373	PS373-RF	2	2	-	3138076	3166833	32.875	26.74	31.66	37.16	19.095	71.175	1.795	15.48	Fun	FBgn0261552	ps
PS373	PS373-RG	2	2	-	3138076	3168662	32.875	26.74	31.66	37.16	19.095	71.175	1.795	15.48	Fun	FBgn0261552	ps
PS373	PS373-RH	2	2	-	3138076	3168662	32.875	26.74	31.66	37.16	19.095	71.175	1.795	15.48	Fun	FBgn0261552	ps
PS373	PS373-RI	2	2	-	3138076	3168662	32.875	26.74	31.66	37.16	19.095	71.175	1.795	15.48	Fun	FBgn0261552	ps
PS373	PS373-RJ	2	2	-	3138076	3173711	32.875	26.74	31.66	37.16	19.095	71.175	1.795	15.48	Fun	FBgn0261552	ps
PS373	PS373-RK	2	2	-	3138076	3180071	32.875	26.74	31.66	37.16	19.095	71.175	1.795	15.48	Fun	FBgn0261552	ps
PS373	PS373-RL	2	2	-	3138076	3180071	32.875	26.74	31.66	37.16	19.095	71.175	1.795	15.48	Fun	FBgn0261552	ps
PS373	PS373-RM	2	2	-	3138076	3180071	32.875	26.74	31.66	37.16	19.095	71.175	1.795	15.48	Fun	FBgn0261552	ps
PS373	PS373-RN	2	2	-	3138076	3180071	32.875	26.74	31.66	37.16	19.095	71.175	1.795	15.48	Fun	FBgn0261552	ps
PS373	PS373-RO	2	2	-	3138076	3180071	32.875	26.74	31.66	37.16	19.095	71.175	1.795	15.48	Fun	FBgn0261552	ps
PS373	PS373-RP	2	2	-	3138076	3180071	32.875	26.74	31.66	37.16	19.095	71.175	1.795	15.48	Fun	FBgn0261552	ps
PS373	PS373-RQ	2	2	-	3138099	3158818	32.875	26.74	31.66	37.16	19.095	71.175	1.795	15.48	Fun	FBgn0261552	ps
PS373	PS373-RR	2	2	-	3138099	3180045	32.875	26.74	31.66	37.16	19.095	71.175	1.795	15.48	Fun	FBgn0261552	ps
PS373	PS373-RS	2	2	-	3138099	3180045	32.875	26.74	31.66	37.16	19.095	71.175	1.795	15.48	Fun	FBgn0261552	ps
PS373	PS373-RT	2	2	-	3138116	3161231	32.875	26.74	31.66	37.16	19.095	71.175	1.795	15.48	Fun	FBgn0261552	ps
PS373	PS373-RU	2	2	-	3138116	3180032	32.875	26.74	31.66	37.16	19.095	71.175	1.795	15.48	Fun	FBgn0261552	ps
PS373	PS373-RV	2	2	-	3138116	3180032	32.875	26.74	31.66	37.16	19.095	71.175	1.795	15.48	Fun	FBgn0261552	ps
PS373	PS373-RW	2	2	-	3139413	3158676	32.875	26.74	31.66	37.16	19.095	71.175	1.795	15.48	Fun	FBgn0261552	ps
PS373	PS373-RX	2	2	-	3139413	3167678	32.875	26.74	31.66	37.16	19.095	71.175	1.795	15.48	Fun	FBgn0261552	ps
PS373	PS373-RY	2	2	-	3139413	3167741	32.875	26.74	31.66	37.16	19.095	71.175	1.795	15.48	Fun	FBgn0261552	ps
PS373	PS373-RZ	2	2	-	3139413	3167741	32.875	26.74	31.66	37.16	19.095	71.175	1.795	15.48	Fun	FBgn0261552	ps
PS373	PS373-RAA	2	2	-	3139413	3180040	32.875	26.74	31.66	37.16	19.095	71.175	1.795	15.48	Fun	FBgn0261552	ps
PS373	PS373-RAB	2	2	-	3140876	3158818	32.875	26.74	31.66	37.16	19.095	71.175	1.795	15.48	Fun	FBgn0261552	ps
PS373	PS373-RAC	2	2	-	3140876	3167678	32.875	26.74	31.66	37.16	19.095	71.175	1.795	15.48	Fun	FBgn0261552	ps
PS373	PS373-RAD	2	2	-	3140876	3180040	32.875	26.74	31.66	37.16	19.095	71.175	1.795	15.48	Fun	FBgn0261552	ps
PS374	PS374-RA	2	2	-	3180634	3184798	10.89	18.145	27.7	51.285	15.295	55.825	23.935	65.775	Fun	FBgn0011740	alpha-Man-IIa
PS375	PS375-RA	2	2	+	3184576	3189140	0.4	2.935	3.625	37.2	0.515	714.205	0.035	510.365	Fun	FBgn0003889	betaTub85D
PS375	PS375-RB	2	2	+	3186849	3188958	0.4	2.935	3.625	37.2	0.515	714.205	0.035	510.365	Fun	FBgn0003889	betaTub85D
PS376	PS376-RA	2	2	-	3189261	3192609	7.145	8.93	17.2	15.87	20.375	10.555	18.825	7.925	Fun	FBgn0037689	CG8135
PS377	PS377-RA	2	2	+	3192519	3195013	4.35	7.6	7.52	13.475	14.19	47.225	21.335	71.635	Fun	FBgn0037688	CG9356
PS377	PS377-RB	2	2	+	3192618	3195013	4.35	7.6	7.52	13.475	14.19	47.225	21.335	71.635	Fun	FBgn0037688	CG9356
PS378	PS378-RA	2	2	-	3194034	3195018	27.605	22.74	15.855	13.27	40.315	22.905	26.77	3.25	Fun	FBgn0037687	CG8132
PS379	PS379-RA	2	2	+	3195509	3196422	956.065	1125.87	847.935	816.02	1211.37	247.595	1085.61	98.65	Fun	FBgn0037686	RpL34b
PS380	PS380-RA	2	2	+	3196478	3197714	14.165	13.495	10.15	12.79	48.285	77.86	43.255	34.115	Fun	FBgn0083953	CG34117
PS380	PS380-RB	2	2	+	3196478	3197714	14.165	13.495	10.15	12.79	48.285	77.86	43.255	34.115	Fun	FBgn0083953	CG34117
PS381	PS381-RA	2	2	+	3201284	3202116	0	1.99	0.03	14.425	0.07	73.765	0.075	268.33	Fun	FBgn0033168	CG11145
PS381	PS381-RB	2	2	+	3201284	3202616	0	1.99	0.03	14.425	0.07	73.765	0.075	268.33	Fun	FBgn0033168	CG11145
PS382	PS382-RA	2	2	+	3202659	3232511	11.635	15.955	23.015	21.655	6.635	16.825	0.4	2.04	Fun	FBgn0000723	FER
PS382	PS382-RB	2	2	+	3202659	3232582	11.635	15.955	23.015	21.655	6.635	16.825	0.4	2.04	Fun	FBgn0000723	FER
PS382	PS382-RC	2	2	+	3202659	3232582	11.635	15.955	23.015	21.655	6.635	16.825	0.4	2.04	Fun	FBgn0000723	FER
PS382	PS382-RD	2	2	+	3229602	3232502	11.635	15.955	23.015	21.655	6.635	16.825	0.4	2.04	Fun	FBgn0000723	FER
PS383	PS383-RA	2	2	-	3232333	3234842	45.49	27.02	2.66	1.66	11.55	34.69	0.12	4.975	Fun	FBgn0037684	Srr
PS384	PS384-RA	2	2	-	3235360	3258922	53.44	145.8	224.345	240.39	114.775	195.77	84.51	188.8	Fun	FBgn0263750	CG43675
PS384	PS384-RB	2	2	-	3237379	3245118	53.44	145.8	224.345	240.39	114.775	195.77	84.51	188.8	Fun	FBgn0263750	CG43675
PS384	PS384-RC	2	2	-	3237379	3245118	53.44	145.8	224.345	240.39	114.775	195.77	84.51	188.8	Fun	FBgn0263750	CG43675
PS384	PS384-RD	2	2	-	3237379	3246252	53.44	145.8	224.345	240.39	114.775	195.77	84.51	188.8	Fun	FBgn0263750	CG43675
PS384	PS384-RE	2	2	-	3238752	3246188	53.44	145.8	224.345	240.39	114.775	195.77	84.51	188.8	Fun	FBgn0263750	CG43675
PS385	PS385-RA	2	2	-	3262903	3265177	9.615	17.655	61.565	58.28	28.34	13.335	24.2	9.36	Fun	FBgn0037680	pasi2
PS385	PS385-RB	2	2	-	3262905	3264988	9.615	17.655	61.565	58.28	28.34	13.335	24.2	9.36	Fun	FBgn0037680	pasi2
PS386	PS386-RA	2	2	-	3266621	3268313	11.745	13.995	14.25	18.185	197.32	13.545	228.33	10.12	Fun	FBgn0038989	CG6937
PS387	PS387-RA	2	2	+	3268396	3270385	4.005	5.655	12.88	16.535	13.715	3.225	25.395	4.89	Fun	FBgn0053107	CG33107
PS388	PS388-RA	2	2	+	3270425	3271872	15.785	20.13	25.165	28.71	204.23	9.41	237.685	5.125	Fun	FBgn0024558	Dph5
PS389	PS389-RA	2	2	-	3271853	3273574	14.94	21.69	28.885	35.97	48.565	44.285	94.575	99.355	Fun	FBgn0028837	CSN6
PS390	PS390-RA	2	2	-	3274223	3289421	0.71	0.535	0.055	0.065	1.79	10.05	0.01	0.225	Fun	FBgn0053110	CG33110
PS391	PS391-RA	2	2	+	3291969	3295980	5.505	3.63	0.9	1.44	7.95	1.735	0.43	0.26	Fun	FBgn0038986	sit
PS392	PS392-RA	2	2	-	3298234	3301599	11.945	13.07	1.785	22.7	22.905	53.195	2.39	23.235	Fun	FBgn0260942	bond
PS392	PS392-RB	2	2	-	3298234	3303969	11.945	13.07	1.785	22.7	22.905	53.195	2.39	23.235	Fun	FBgn0260942	bond
PS393	PS393-RA	2	2	+	3306490	3310848	34.995	42.05	78.01	96.07	92.985	129.68	84.805	202.465	Fun	FBgn0038984	AdipoR
PS394	PS394-RA	2	2	+	3319931	3322201	1.035	0.67	1.085	1.99	40.7	10.84	1.06	0.125	Fun	FBgn0038983	CG5326
PS395	PS395-RA	2	2	+	3322386	3323815	3.42	0.835	7.24	5.105	3.27	2.38	0	0.785	Fun	FBgn0053099	CG33099
PS396	PS396-RA	2	2	+	3324180	3331768	18.545	20.94	21.875	21.105	15.365	20.22	1.835	5.015	Fun	FBgn0038981	CG5346
PS397	PS397-RA	2	2	-	3361340	3362446	0.17	0.675	0.515	1.395	123.155	0.465	107.78	0.96	Fun	FBgn0036799	CG13380
PS398	PS398-RA	2	2	+	3362967	3370807	7.02	9.45	9.05	14	14.805	31.53	11.435	33.465	Fun	FBgn0024273	WASp
PS398	PS398-RB	2	2	+	3362977	3370805	7.02	9.45	9.05	14	14.805	31.53	11.435	33.465	Fun	FBgn0024273	WASp
PS398	PS398-RC	2	2	+	3362988	3370803	7.02	9.45	9.05	14	14.805	31.53	11.435	33.465	Fun	FBgn0024273	WASp
PS398	PS398-RD	2	2	+	3363650	3370804	7.02	9.45	9.05	14	14.805	31.53	11.435	33.465	Fun	FBgn0024273	WASp
PS398	PS398-RE	2	2	+	3366022	3370805	7.02	9.45	9.05	14	14.805	31.53	11.435	33.465	Fun	FBgn0024273	WASp
PS399	PS399-RA	2	2	-	3371924	3377435	1.57	2.7	4.57	5.915	10.58	3.66	13.855	2.75	Dis	FBgn0039602	CG1647
PS400	PS400-RA	2	2	+	3376969	3379497	4.935	10.42	13.97	29.775	11.535	19.055	24.095	22.71	Fun	FBgn0039601	CG1523
PS400	PS400-RB	2	2	+	3376969	3379497	4.935	10.42	13.97	29.775	11.535	19.055	24.095	22.71	Fun	FBgn0039601	CG1523
PS401	PS401-RA	2	2	-	3379394	3385226	19.85	30.4	70.04	72.44	39.935	25.97	37.925	16.225	Fun	FBgn0039600	CG1646
PS401	PS401-RB	2	2	-	3379582	3385265	19.85	30.4	70.04	72.44	39.935	25.97	37.925	16.225	Fun	FBgn0039600	CG1646
PS401	PS401-RC	2	2	-	3379587	3385265	19.85	30.4	70.04	72.44	39.935	25.97	37.925	16.225	Fun	FBgn0039600	CG1646
PS402	PS402-RA	2	2	+	3386754	3390148	4.45	5.71	8.105	11.755	20.575	7.54	30.46	4.835	Fun	FBgn0005642	wdn
PS403	PS403-RA	2	2	-	3390029	3390872	0	0	0.155	0	0.065	3.14	0	0.135	Fun	FBgn0261289	CheB98a
PS404	PS404-RA	2	2	-	3402551	3404522	0	0	0	0	0	23.635	0	0.68	Fun	FBgn0039599	intr
PS405	PS405-RA	2	2	+	3423660	3426878	0	0	0.01	0.015	0.01	104	0	3.54	Dis	FBgn0039598	aqrs
PS406	PS406-RA	2	2	+	3431178	3433796	0.35	0.12	0.015	0	0.075	8.325	0	0.54	Fun	FBgn0039596	CG10000
PS407	PS407-RA	2	2	+	3438548	3446972	1.61	1.675	0.035	0.055	0.645	2.09	0	0.25	Fun	FBgn0039595	AstA-R2
PS408	PS408-RA	2	2	-	3449745	3490799	2.41	2.975	5.315	4.825	3.715	4.345	4.445	2.515	Fun	FBgn0027655	htt
PS409	PS409-RA	2	2	-	3491342	3511755	2.86	3.045	4.355	5.42	16.815	21.58	0.505	2.31	Fun	FBgn0039594	snu
PS409	PS409-RB	2	2	-	3491342	3519633	2.86	3.045	4.355	5.42	16.815	21.58	0.505	2.31	Fun	FBgn0039594	snu
PS409	PS409-RC	2	2	-	3491343	3495277	2.86	3.045	4.355	5.42	16.815	21.58	0.505	2.31	Fun	FBgn0039594	snu
PS409	PS409-RD	2	2	-	3491347	3511755	2.86	3.045	4.355	5.42	16.815	21.58	0.505	2.31	Fun	FBgn0039594	snu
PS409	PS409-RE	2	2	-	3502558	3511755	2.86	3.045	4.355	5.42	16.815	21.58	0.505	2.31	Fun	FBgn0039594	snu
PS410	PS410-RA	2	2	-	3522528	3523321	0	0	0	0	0.145	2.195	0	0.3	Dis	FBgn0261292	CheB53a
PS411	PS411-RA	2	2	+	3525034	3527101	0	5.33	0	12.055	0	21.74	0	34.63	Dis	FBgn0011569	can
PS411	PS411-RB	2	2	+	3525034	3527101	0	5.33	0	12.055	0	21.74	0	34.63	Dis	FBgn0011569	can
PS412	PS412-RA	2	2	+	3546688	3547688	0	0.215	0.265	3.07	0	10.31	0	23.6	Fun
PS413	PS413-RA	2	2	+	3554451	3556081	0	0	0.02	0.115	0	0	0	0	Sil	FBgn0039592	CG14062
PS414	PS414-RA	2	2	+	3558431	3559871	0	0	0	0	0	0	0	0.03	Sil	FBgn0039592	CG14062
PS415	PS415-RA	2	2	+	3560036	3561667	1.245	2.12	55.165	48.085	0.495	2.935	0	0.485	Fun	FBgn0039592	CG14062
PS416	PS416-RA	2	2	-	3564656	3567564	1.095	2.845	0.02	0.085	0.095	0.25	0	0.015	Dis	FBgn0039591	CG9988
PS417	PS417-RA	2	2	+	3569847	3607673	1.43	4.815	8.49	7.4	4.91	5.51	3.705	2.46	Dis	FBgn0039590	CG10011
PS417	PS417-RB	2	2	+	3569847	3607673	1.43	4.815	8.49	7.4	4.91	5.51	3.705	2.46	Dis	FBgn0039590	CG10011
PS418	PS418-RA	2	2	-	3606239	3609579	2.62	4.08	3.445	5.585	16.97	4.345	12.985	3.745	Fun	FBgn0039589	CG9986
PS419	PS419-RA	2	2	-	3609959	3616769	43.54	60.07	172.35	137.15	168.795	41.27	131.9	16.95	Fun	FBgn0001215	Hrb98DE
PS419	PS419-RB	2	2	-	3609959	3616769	43.54	60.07	172.35	137.15	168.795	41.27	131.9	16.95	Fun	FBgn0001215	Hrb98DE
PS419	PS419-RC	2	2	-	3609959	3616796	43.54	60.07	172.35	137.15	168.795	41.27	131.9	16.95	Fun	FBgn0001215	Hrb98DE
PS420	PS420-RA	2	2	-	3618409	3619636	0	0.44	0	4.195	0	20.99	0	250.395	Fun	FBgn0038978	tHMG1
PS421	PS421-RA	2	2	+	3619908	3622540	0	0.43	0	2.96	0	12.095	0.015	92.94	Fun
PS421	PS421-RB	2	2	+	3619946	3622540	0	0.43	0	2.96	0	12.095	0.015	92.94	Fun
PS422	PS422-RA	2	2	-	3620367	3629827	1.365	1.915	0.08	0.885	17.46	3.205	5.005	2.02	Fun	FBgn0013953	Esp
PS423	PS423-RA	2	2	-	3630945	3634936	0.835	1.185	2.96	2.145	2.15	6.885	0	0.045	Fun	FBgn0039232	sosie
PS424	PS424-RA	2	2	-	3636954	3639510	0.02	1.665	0	13.325	0	34.78	0	72.64	Fun	FBgn0050384	CG30384
PS425	PS425-RA	2	2	-	3644497	3645884	86.57	107.555	90.835	95.545	100.105	57.765	102.23	36.325	Fun	FBgn0024509	Sec13
PS426	PS426-RA	2	2	-	3646355	3647439	6.13	9.775	13.82	21.09	12.01	26.81	14.8	39.22	Fun
PS427	PS427-RA	2	2	+	3647514	3648517	454.005	451.08	244.55	291.705	621.35	1203.18	213.27	103.79	Fun	FBgn0016119	ATPsynCF6
PS427	PS427-RB	2	2	+	3647626	3648517	454.005	451.08	244.55	291.705	621.35	1203.18	213.27	103.79	Fun	FBgn0016119	ATPsynCF6
PS428	PS428-RA	2	2	-	3648112	3658705	1.71	1.855	0.78	1.915	11.13	3.44	10.64	3.75	Fun	FBgn0264326	PolE1
PS429	PS429-RA	2	2	-	3676623	3677200	0.775	0.86	1.29	1.9	0	1.75	0	0.31	Dis	FBgn0002941	slou
PS430	PS430-RA	2	2	-	3688507	3689859	0.035	1.525	0	10.785	0	61.34	0	150.015	Fun	FBgn0030015	CG10761
PS431	PS431-RA	2	2	-	3708423	3708848	3440.47	9774.42	1.2	2.33	0	0	0	0	Fun	FBgn0040565	CG7606
PS432	PS432-RA	2	2	-	3710206	3710985	2631.19	5805.01	1.085	0.44	0	0.17	0	0.085	Fun	FBgn0038523	Sgs5bis
PS432	PS432-RB	2	2	-	3710206	3710985	2631.19	5805.01	1.085	0.44	0	0.17	0	0.085	Fun	FBgn0038523	Sgs5bis
PS433	PS433-RA	2	2	-	3727999	3729128	0.22	0.93	2.02	1.385	0.185	0.8	0	0	Dis	FBgn0264005	Hmx
PS434	PS434-RA	2	2	+	3750546	3752288	49.585	55.395	50.325	64.875	95.575	55.685	105.33	37.425	Fun	FBgn0038519	Prx3
PS435	PS435-RA	2	2	-	3752226	3757749	6.16	8.64	15.07	14.955	26.46	11.465	31.005	5.64	Fun	FBgn0025571	SF1
PS435	PS435-RB	2	2	-	3752229	3756865	6.16	8.64	15.07	14.955	26.46	11.465	31.005	5.64	Fun	FBgn0025571	SF1
PS436	PS436-RA	2	2	+	3757184	3760585	10.385	15.755	30.995	32.65	38.235	20.455	55.485	27.635	Fun	FBgn0040080	pins
PS437	PS437-RA	2	2	-	3761155	3772345	3.42	2.065	0.01	0.025	0.345	0.89	0.04	0.37	Fun	FBgn0039527	CG5639
PS438	PS438-RA	2	2	-	3774677	3783093	3.22	4.72	7.79	7.345	11.53	10.795	11.4	3.705	Fun	FBgn0039528	dsd
PS439	PS439-RA	2	2	+	3783655	3816879	0.25	0.535	2.335	2.22	2.035	3.895	0.875	2.11	Fun	FBgn0039530	Tusp
PS440	PS440-RA	2	2	-	3801853	3805236	16.035	11.99	9.97	5.36	28.28	47.63	13.795	3.965	Dis	FBgn0039529	CG5612
PS441	PS441-RA	2	2	-	3816299	3818110	5.575	5.62	5.125	7.735	13.13	7.115	30.4	9.075	Fun	FBgn0039531	CG5611
PS442	PS442-RA	2	2	+	3818489	3821706	9.48	17.61	33.955	44.95	31.955	93.6	62.78	171.835	Fun	FBgn0039532	Mtl
PS442	PS442-RB	2	2	+	3818495	3821631	9.48	17.61	33.955	44.95	31.955	93.6	62.78	171.835	Fun	FBgn0039532	Mtl
PS443	PS443-RA	2	2	-	3822397	3829460	6.92	5.255	30.81	23.85	7.185	29.475	0.14	2.525	Fun	FBgn0266579	tau
PS443	PS443-RB	2	2	-	3822397	3839304	6.92	5.255	30.81	23.85	7.185	29.475	0.14	2.525	Fun	FBgn0266579	tau
PS443	PS443-RC	2	2	-	3822508	3839301	6.92	5.255	30.81	23.85	7.185	29.475	0.14	2.525	Fun	FBgn0266579	tau
PS443	PS443-RD	2	2	-	3822508	3839303	6.92	5.255	30.81	23.85	7.185	29.475	0.14	2.525	Fun	FBgn0266579	tau
PS444	PS444-RA	2	2	-	3840298	3842998	6275.93	5031.23	354.145	166.5	1580.54	5614.46	46.545	26.21	Fun	FBgn0002772	Mlc1
PS444	PS444-RB	2	2	-	3840299	3843007	6275.93	5031.23	354.145	166.5	1580.54	5614.46	46.545	26.21	Fun	FBgn0002772	Mlc1
PS444	PS444-RC	2	2	-	3840299	3843007	6275.93	5031.23	354.145	166.5	1580.54	5614.46	46.545	26.21	Fun	FBgn0002772	Mlc1
PS445	PS445-RA	2	2	+	3840301	3842888	11.665	8.615	1.22	0.17	0.41	0.68	0	0.07	Fun
PS446	PS446-RA	2	2	-	3859581	3861107	9.39	14.525	20.545	25.36	44.625	16.23	39.935	10.135	Fun	FBgn0032321	YL-1
PS447	PS447-RA	2	2	+	3861844	3865204	41.075	40.6	52.73	44.625	41.92	9.905	40.745	5.57	Fun	FBgn0039537	CG5590
PS448	PS448-RA	2	2	-	3865034	3867088	9.13	14.6	20.055	26.765	32.535	16.3	34.02	10.425	Fun	FBgn0003330	Sce
PS449	PS449-RA	2	2	-	3871907	3874586	0.02	5.3	0.025	71.215	0	132.13	0	154.04	Fun	FBgn0051055	CG31055
PS450	PS450-RA	2	2	+	3872132	3879310	6.67	16.79	214.495	175.145	0.2	0.97	0.045	1.03	Fun	FBgn0046258	CG12880
PS450	PS450-RB	2	2	+	3872132	3879310	6.67	16.79	214.495	175.145	0.2	0.97	0.045	1.03	Fun	FBgn0046258	CG12880
PS450	PS450-RC	2	2	+	3878079	3879310	6.67	16.79	214.495	175.145	0.2	0.97	0.045	1.03	Fun	FBgn0046258	CG12880
PS451	PS451-RA	2	2	+	3882469	3885956	40.09	63.12	51.05	71.86	49.25	40.12	37.92	33.64	Fun	FBgn0086346	ALiX
PS452	PS452-RA	2	2	-	3885628	3887477	6.365	8.945	7.045	9.115	13.375	5.29	15.81	3.635	Fun	FBgn0263025	HSPBAP1
PS452	PS452-RB	2	2	-	3885628	3887477	6.365	8.945	7.045	9.115	13.375	5.29	15.81	3.635	Fun	FBgn0263025	HSPBAP1
PS453	PS453-RA	2	2	+	3887473	3890927	6.715	9.195	14.035	15.2	28.805	13.615	26.185	14.405	Fun	FBgn0045862	btz
PS454	PS454-RA	2	2	-	3890460	3894356	19.345	17.345	14.15	13.35	13.085	6.02	31.9	8.045	Fun	FBgn0039543	CROT
PS454	PS454-RB	2	2	-	3890460	3894375	19.345	17.345	14.15	13.35	13.085	6.02	31.9	8.045	Fun	FBgn0039543	CROT
PS454	PS454-RC	2	2	-	3890460	3894459	19.345	17.345	14.15	13.35	13.085	6.02	31.9	8.045	Fun	FBgn0039543	CROT
PS455	PS455-RA	2	2	+	3893228	3897952	2.5	5.17	5.31	20.23	15.41	52.205	21.01	58.475	Fun	FBgn0039544	CG12877
PS456	PS456-RA	2	2	+	3916991	3920059	2.055	2.2	6.425	5.78	2.93	6.215	0.345	1.085	Fun	FBgn0005659	Ets98B
PS456	PS456-RB	2	2	+	3916991	3929770	2.055	2.2	6.425	5.78	2.93	6.215	0.345	1.085	Fun	FBgn0005659	Ets98B
PS457	PS457-RA	2	2	-	3951127	4092306	0.265	0.435	6.62	5.4	0.52	2.69	0	0.035	Fun	FBgn0085382	CG34353
PS458	PS458-RA	2	2	+	3966986	3968785	0	3.38	0	29.375	0	105.48	0	300.695	Fun	FBgn0027498	CG2061
PS459	PS459-RA	2	2	-	3972206	4021975	0	0	0.11	0	0	0	0	0.06	Sil	FBgn0085382	CG34353
PS460	PS460-RA	2	2	+	4033156	4035653	0	0	0	0	0	0.035	0	0	Sil	FBgn0039551	Or98a
PS461	PS461-RA	2	2	-	4058274	4059215	0	0	0	1.14	0	8.11	0	24.02	Fun	FBgn0039552	CG12426
PS462	PS462-RA	2	2	+	4100228	4102055	0.05	70.525	0.065	809.36	0.045	1181.39	0.13	6358.97	Dis	FBgn0267366	mil
PS463	PS463-RA	2	2	-	4102342	4105501	10.44	14.52	16.925	15.56	20.54	7.365	27.545	5.025	Fun	FBgn0039554	CG5003
PS463	PS463-RB	2	2	-	4102508	4105501	10.44	14.52	16.925	15.56	20.54	7.365	27.545	5.025	Fun	FBgn0039554	CG5003
PS464	PS464-RA	2	2	+	4104747	4107104	5.775	7.69	8.92	9.275	21.445	9.325	16.885	13.905	Fun	FBgn0039555	mRpS22
PS464	PS464-RB	2	2	+	4104747	4107104	5.775	7.69	8.92	9.275	21.445	9.325	16.885	13.905	Fun	FBgn0039555	mRpS22
PS465	PS465-RA	2	2	-	4106968	4109058	3.725	5.95	13.63	13.605	16.825	7.125	21.845	7.77	Fun	FBgn0053213	CG33213
PS466	PS466-RA	2	2	+	4108324	4109660	7.43	12.605	16.725	18.83	40.735	14.28	36.12	12.86	Fun	FBgn0001491	l(1)10Bb
PS467	PS467-RA	2	2	-	4109099	4112196	84.185	95.545	87.785	86.32	113.48	64.26	121.775	22.75	Fun	FBgn0019925	Surf4
PS468	PS468-RA	2	2	+	4111732	4116666	19.095	29.785	55.015	55.135	74.62	34.285	109.965	18.77	Fun	FBgn0261679	CG42726
PS468	PS468-RB	2	2	+	4111732	4116666	19.095	29.785	55.015	55.135	74.62	34.285	109.965	18.77	Fun	FBgn0261679	CG42726
PS468	PS468-RC	2	2	+	4111732	4119145	19.095	29.785	55.015	55.135	74.62	34.285	109.965	18.77	Fun	FBgn0261679	CG42726
PS468	PS468-RD	2	2	+	4114654	4116666	19.095	29.785	55.015	55.135	74.62	34.285	109.965	18.77	Fun	FBgn0261679	CG42726
PS468	PS468-RE	2	2	+	4114654	4116666	19.095	29.785	55.015	55.135	74.62	34.285	109.965	18.77	Fun	FBgn0261679	CG42726
PS469	PS469-RA	2	2	-	4118199	4119918	4.02	8.125	6.565	15.12	11.77	18.225	13.335	29.775	Fun	FBgn0266722	Trs33
PS470	PS470-RA	2	2	+	4119719	4122857	1.005	1.48	6.385	6.33	7.005	4.255	15.115	7.08	Fun	FBgn0038324	CG5038
PS471	PS471-RA	2	2	-	4122392	4125826	4.085	6.765	11.01	10.89	31.475	6.41	26.35	4.455	Fun	FBgn0038325	Atg4b
PS471	PS471-RB	2	2	-	4122397	4125859	4.085	6.765	11.01	10.89	31.475	6.41	26.35	4.455	Fun	FBgn0038325	Atg4b
PS472	PS472-RA	2	2	+	4125713	4127960	15.125	14.23	11.98	11.97	35.42	15.08	24.86	6.275	Fun	FBgn0038326	CG5044
PS472	PS472-RB	2	2	+	4125713	4128019	15.125	14.23	11.98	11.97	35.42	15.08	24.86	6.275	Fun	FBgn0038326	CG5044
PS472	PS472-RC	2	2	+	4125714	4128019	15.125	14.23	11.98	11.97	35.42	15.08	24.86	6.275	Fun	FBgn0038326	CG5044
PS473	PS473-RA	2	2	-	4127807	4130530	6.92	7.915	8.555	12.905	25.36	14.23	28.865	11.525	Fun	FBgn0026634	Cog2
PS474	PS474-RA	2	2	+	4130402	4131551	15.36	24.81	33.45	44.8	53.455	34.605	64.6	56.955	Fun	FBgn0038327	Trax
PS475	PS475-RA	2	2	-	4131037	4132700	2.285	4.305	4.145	11.92	12.57	17.94	31.005	25.745	Fun	FBgn0026737	CG6171
PS475	PS475-RB	2	2	-	4131451	4132700	2.285	4.305	4.145	11.92	12.57	17.94	31.005	25.745	Fun	FBgn0026737	CG6171
PS476	PS476-RA	2	2	+	4133158	4155301	12.57	18.395	23.385	23.865	15.53	106.355	15.595	156.165	Fun	FBgn0020278	loco
PS476	PS476-RB	2	2	+	4136839	4155238	12.57	18.395	23.385	23.865	15.53	106.355	15.595	156.165	Fun	FBgn0020278	loco
PS476	PS476-RC	2	2	+	4137513	4155301	12.57	18.395	23.385	23.865	15.53	106.355	15.595	156.165	Fun	FBgn0020278	loco
PS476	PS476-RD	2	2	+	4141093	4155301	12.57	18.395	23.385	23.865	15.53	106.355	15.595	156.165	Fun	FBgn0020278	loco
PS476	PS476-RE	2	2	+	4147967	4155238	12.57	18.395	23.385	23.865	15.53	106.355	15.595	156.165	Fun	FBgn0020278	loco
PS476	PS476-RF	2	2	+	4147994	4157969	12.57	18.395	23.385	23.865	15.53	106.355	15.595	156.165	Fun	FBgn0020278	loco
PS477	PS477-RA	2	2	-	4156594	4159900	9.935	10.265	13.105	13.64	23.76	14.435	15.705	4.975	Fun	FBgn0263863	mRpL45
PS476	PS476-RG	2	2	+	4156771	4158597	12.57	18.395	23.385	23.865	15.53	106.355	15.595	156.165	Fun	FBgn0020278	loco
PS478	PS478-RA	2	2	-	4160641	4168469	0.6	5.195	1.7	48.35	5.42	412.155	6.575	390.34	Fun	FBgn0051161	CG31161
PS478	PS478-RB	2	2	-	4160645	4165357	0.6	5.195	1.7	48.35	5.42	412.155	6.575	390.34	Fun	FBgn0051161	CG31161
PS479	PS479-RA	2	2	+	4161525	4162620	0	0.09	0.03	2.715	0.035	3.405	0	7.675	Dis
PS478	PS478-RC	2	2	-	4163137	4168247	0.6	5.195	1.7	48.35	5.42	412.155	6.575	390.34	Fun	FBgn0051161	CG31161
PS480	PS480-RA	2	2	+	4168304	4173690	1.065	2.205	2.52	3.55	10.705	3.225	12.91	2.665	Fun	FBgn0051156	CG31156
PS481	PS481-RA	2	2	-	4171085	4172381	0	4.065	0.1	23.67	0.065	96.325	0	147.985	Fun	FBgn0038993	CG13843
PS482	PS482-RA	2	2	-	4172621	4179983	5.25	9.99	30.965	34.065	32.555	14.805	26.135	5.885	Fun	FBgn0051158	Efa6
PS482	PS482-RB	2	2	-	4172934	4193258	5.25	9.99	30.965	34.065	32.555	14.805	26.135	5.885	Fun	FBgn0051158	Efa6
PS482	PS482-RC	2	2	-	4172934	4193283	5.25	9.99	30.965	34.065	32.555	14.805	26.135	5.885	Fun	FBgn0051158	Efa6
PS483	PS483-RA	2	2	+	4195309	4197808	2.65	4.08	7.55	9.295	18.38	7.505	16.885	5.135	Fun	FBgn0037679	Aduk
PS483	PS483-RB	2	2	+	4195335	4197808	2.65	4.08	7.55	9.295	18.38	7.505	16.885	5.135	Fun	FBgn0037679	Aduk
PS484	PS484-RA	2	2	+	4197940	4199410	37.515	42.32	0.2	0.085	15.5	20.615	0.06	0.03	Fun	FBgn0037678	CG16749
PS485	PS485-RA	2	2	+	4199672	4228929	0.305	0.665	4.275	3.48	1.505	8.44	0	0.63	Fun	FBgn0037676	CG8861
PS485	PS485-RB	2	2	+	4201315	4228919	0.305	0.665	4.275	3.48	1.505	8.44	0	0.63	Fun	FBgn0037676	CG8861
PS486	PS486-RA	2	2	-	4248407	4252898	0	0	0	0	0.055	0.08	0.01	0	Sil	FBgn0039833	CG15564
PS487	PS487-RA	2	2	-	4253752	4272745	3.795	2.8	3.26	3.53	11.5	10.18	11.51	1.38	Fun	FBgn0051005	qless
PS488	PS488-RA	2	2	+	4273047	4273846	17.005	20.975	23.92	31.195	71.95	22.72	65.52	14.625	Fun	FBgn0039835	mRpL32
PS489	PS489-RA	2	2	-	4273641	4275116	3.66	4.51	5.12	5.275	6.545	4.615	2.375	1.355	Fun	FBgn0039836	CG1750
PS490	PS490-RA	2	2	+	4275474	4277629	6.595	11.78	14.82	36.16	21.735	37.55	32.575	56.315	Fun	FBgn0086362	spn-F
PS491	PS491-RA	2	2	+	4278409	4280960	0	0	0.645	0.225	0.105	0.235	0	0	Sil	FBgn0039838	CAH6
PS492	PS492-RA	2	2	+	4282096	4283522	0	0	151.135	93.465	0	0	0	0	Fun	FBgn0040629	CAH5
PS493	PS493-RA	2	2	-	4282364	4282716	0	0	4.595	2.425	0	0	0	0	Dis
PS494	PS494-RA	2	2	+	4284169	4302307	0	0	0	0	0	0.015	0	0	Sil	FBgn0039839	ppk24
PS495	PS495-RA	2	2	-	4323943	4326787	5.37	5.705	0.03	0	0.68	1.58	0.02	0.08	Fun	FBgn0039840	pHCl-2
PS495	PS495-RB	2	2	-	4324158	4326788	5.37	5.705	0.03	0	0.68	1.58	0.02	0.08	Fun	FBgn0039840	pHCl-2
PS496	PS496-RA	2	2	+	4333078	4393403	1.05	2.77	21.885	19.42	3.645	3.705	1.12	1.445	Fun	FBgn0085376	CG34347
PS496	PS496-RB	2	2	+	4333078	4393484	1.05	2.77	21.885	19.42	3.645	3.705	1.12	1.445	Fun	FBgn0085376	CG34347
PS496	PS496-RC	2	2	+	4333086	4393484	1.05	2.77	21.885	19.42	3.645	3.705	1.12	1.445	Fun	FBgn0085376	CG34347
PS496	PS496-RD	2	2	+	4333086	4393484	1.05	2.77	21.885	19.42	3.645	3.705	1.12	1.445	Fun	FBgn0085376	CG34347
PS496	PS496-RE	2	2	+	4387143	4393484	1.05	2.77	21.885	19.42	3.645	3.705	1.12	1.445	Fun	FBgn0085376	CG34347
PS497	PS497-RA	2	2	+	4394852	4396885	0	6.36	0.165	30.785	0.205	107.525	0.06	222.85	Fun	FBgn0046332	gskt
PS498	PS498-RA	2	2	-	4396796	4398160	0	0.075	0.055	0.47	0.09	2.435	0	5.81	Fun
PS499	PS499-RA	2	2	+	4406277	4416845	21.565	38.855	36.67	38.25	3.575	9.105	0.11	0.095	Fun	FBgn0039844	CG1607
PS499	PS499-RB	2	2	+	4408258	4416846	21.565	38.855	36.67	38.25	3.575	9.105	0.11	0.095	Fun	FBgn0039844	CG1607
PS500	PS500-RA	2	2	-	4416741	4418900	0	1.74	0.015	8.87	0.07	125.33	0.02	229.215	Fun	FBgn0051204	CG31204
PS500	PS500-RB	2	2	-	4416741	4418900	0	1.74	0.015	8.87	0.07	125.33	0.02	229.215	Fun	FBgn0051204	CG31204
PS501	PS501-RA	2	2	+	4419341	4425413	1.845	2.51	5.235	5.295	11.765	5.895	12.685	5.17	Fun	FBgn0019990	Gcn2
PS502	PS502-RA	2	2	-	4425246	4463330	10.315	11.445	5.175	10.92	22.26	54.735	34.965	130.57	Fun	FBgn0039846	PNPase
PS503	PS503-RA	2	2	+	4429411	4507147	6.605	10.3	26.26	24.02	17.635	7.785	16.835	2.14	Fun	FBgn0261988	Gprk2
PS504	PS504-RA	2	2	+	4454094	4464987	0.465	0.79	5.54	6.57	0.135	0.285	0.07	0.075	Fun
PS505	PS505-RA	2	2	-	4508976	4511512	16.535	11.03	4.22	3.94	30.325	15.75	29.66	3.495	Fun	FBgn0039849	CG11334
PS505	PS505-RB	2	2	-	4508976	4512387	16.535	11.03	4.22	3.94	30.325	15.75	29.66	3.495	Fun	FBgn0039849	CG11334
PS505	PS505-RC	2	2	-	4509037	4511468	16.535	11.03	4.22	3.94	30.325	15.75	29.66	3.495	Fun	FBgn0039849	CG11334
PS506	PS506-RA	2	2	+	4513166	4514106	0	3.775	0.135	28.58	0	134.44	0	398.19	Fun	FBgn0039850	CG11333
PS507	PS507-RA	2	2	+	4531540	4532833	0	3.16	0	18.96	0	13.93	0	17.34	Fun	FBgn0034423	tbrd-2
PS507	PS507-RB	2	2	+	4531540	4532833	0	3.16	0	18.96	0	13.93	0	17.34	Fun	FBgn0034423	tbrd-2
PS508	PS508-RA	2	2	-	4566045	4575387	0.63	3.42	108.765	59.73	0.03	0.36	0	0	Fun	FBgn0039851	mey
PS509	PS509-RA	2	2	+	4614569	4641893	0.06	0.37	46.78	23.67	0	0.02	0	0.03	Fun	FBgn0039852	nyo
PS510	PS510-RA	2	2	+	4649822	4653124	18.665	30	102.885	89.365	64.845	29.06	82.425	7.58	Fun	FBgn0039465	Tsp97E
PS510	PS510-RB	2	2	+	4649822	4653124	18.665	30	102.885	89.365	64.845	29.06	82.425	7.58	Fun	FBgn0039465	Tsp97E
PS511	PS511-RA	2	2	-	4654590	4656949	0	0.235	0.12	2.885	0	4.18	0	7.145	Fun	FBgn0031443	Prosbeta4R2
PS512	PS512-RA	2	2	+	4657402	4666370	22.475	17.9	18.81	16.985	27.96	50.82	1.12	8.635	Fun	FBgn0039464	CG6330
PS512	PS512-RB	2	2	+	4662836	4666370	22.475	17.9	18.81	16.985	27.96	50.82	1.12	8.635	Fun	FBgn0039464	CG6330
PS513	PS513-RA	2	2	+	4666779	4668105	0	2.87	0	27.535	0	20.27	0	80.07	Fun
PS514	PS514-RA	2	2	+	4668983	4671325	4.655	3.445	3.6	6.865	3.58	11.01	0.27	17.655	Fun	FBgn0031489	CG17224
PS514	PS514-RB	2	2	+	4668985	4671153	4.655	3.445	3.6	6.865	3.58	11.01	0.27	17.655	Fun	FBgn0031489	CG17224
PS515	PS515-RA	2	2	-	4670874	4675667	1.115	4.615	3.445	23.535	10.505	24.75	13.115	30.59	Fun	FBgn0039463	Spag1
PS515	PS515-RB	2	2	-	4670877	4675568	1.115	4.615	3.445	23.535	10.505	24.75	13.115	30.59	Fun	FBgn0039463	Spag1
PS516	PS516-RA	2	2	-	4676311	4707439	11.69	11.175	8.65	7.075	6.58	17.16	0.345	1.65	Fun	FBgn0285963	CG46339
PS516	PS516-RB	2	2	-	4676313	4707439	11.69	11.175	8.65	7.075	6.58	17.16	0.345	1.65	Fun	FBgn0285963	CG46339
PS516	PS516-RC	2	2	-	4676335	4707391	11.69	11.175	8.65	7.075	6.58	17.16	0.345	1.65	Fun	FBgn0285963	CG46339
PS517	PS517-RA	2	2	+	4713140	4715304	3.245	5.66	8.715	8.145	19.93	3.95	24.575	3.965	Fun	FBgn0004510	Ets97D
PS517	PS517-RB	2	2	+	4713142	4715269	3.245	5.66	8.715	8.145	19.93	3.95	24.575	3.965	Fun	FBgn0004510	Ets97D
PS518	PS518-RA	2	2	-	4714959	4755662	2.65	3.605	10.23	9.85	18.855	6.225	31.135	5.065	Fun	FBgn0004359	T48
PS519	PS519-RA	2	2	-	4759217	4763638	7.135	13.32	13.62	19.905	60.69	86.665	99.625	337.79	Fun	FBgn0039461	CG5500
PS520	PS520-RA	2	2	+	4764097	4768493	2.805	3.975	10.04	9.645	9.19	5.085	10.085	2.225	Fun	FBgn0004903	Rb97D
PS520	PS520-RB	2	2	+	4764138	4768479	2.805	3.975	10.04	9.645	9.19	5.085	10.085	2.225	Fun	FBgn0004903	Rb97D
PS520	PS520-RC	2	2	+	4764194	4768473	2.805	3.975	10.04	9.645	9.19	5.085	10.085	2.225	Fun	FBgn0004903	Rb97D
PS520	PS520-RD	2	2	+	4764194	4768493	2.805	3.975	10.04	9.645	9.19	5.085	10.085	2.225	Fun	FBgn0004903	Rb97D
PS520	PS520-RE	2	2	+	4764194	4768493	2.805	3.975	10.04	9.645	9.19	5.085	10.085	2.225	Fun	FBgn0004903	Rb97D
PS521	PS521-RA	2	2	+	4768581	4771484	407.14	353.24	128.175	95.28	67.37	36.05	5.345	2.65	Fun	FBgn0026562	SPARC
PS522	PS522-RA	2	2	-	4771513	4773266	105.67	143.335	195.01	210.92	368.305	57.555	371.49	34.465	Fun	FBgn0001197	His2Av
PS522	PS522-RB	2	2	-	4771517	4773204	105.67	143.335	195.01	210.92	368.305	57.555	371.49	34.465	Fun	FBgn0001197	His2Av
PS523	PS523-RA	2	2	-	4774052	4775301	0.43	7.68	0.585	11.195	0.425	15.51	0.425	32.7	Fun	FBgn0024807	DIP1
PS524	PS524-RA	2	2	+	4775225	4777453	7.215	12.925	13.895	30.605	44.415	16.28	68.715	14.5	Fun	FBgn0027889	ball
PS524	PS524-RB	2	2	+	4775225	4777453	7.215	12.925	13.895	30.605	44.415	16.28	68.715	14.5	Fun	FBgn0027889	ball
PS525	PS525-RA	2	2	-	4777216	4779431	3.29	3.925	4.245	4.105	9.42	2.88	22.08	3.025	Fun	FBgn0039459	IntS12
PS526	PS526-RA	2	2	+	4778595	4801615	20.075	19.685	5.895	7.99	16.595	14.645	12.76	10.02	Fun	FBgn0051072	Lerp
PS526	PS526-RB	2	2	+	4778698	4801616	20.075	19.685	5.895	7.99	16.595	14.645	12.76	10.02	Fun	FBgn0051072	Lerp
PS527	PS527-RA	2	2	-	4782729	4783647	0	5.235	0	9.235	0	11.905	0	27.695	Fun
PS526	PS526-RC	2	2	+	4796346	4801615	20.075	19.685	5.895	7.99	16.595	14.645	12.76	10.02	Fun	FBgn0051072	Lerp
PS528	PS528-RA	2	2	-	4802292	4850253	6.105	8.02	36.385	26.08	44.65	4.565	55.085	1.145	Fun	FBgn0262473	Tl
PS529	PS529-RA	2	2	-	4889146	4907748	0.065	3.55	0.145	13.03	0.035	14.64	0.04	19.515	Fun	FBgn0039710	dgt1
PS530	PS530-RA	2	2	-	4917661	4918785	9.185	16.385	0.365	0.245	0.11	0.04	0	0	Fun	FBgn0039454	CG14247
PS531	PS531-RA	2	2	+	4920178	4920842	148.9	87.045	0.185	0	0	0	0	0	Fun	FBgn0039453	CG6403
PS532	PS532-RA	2	2	-	4926974	4929518	0.125	0	0.76	1.21	5.62	39.915	0	0.105	Fun	FBgn0040608	CG14246
PS533	PS533-RA	2	2	-	4927641	4928118	134.36	72.035	20.96	12.07	5.325	29.29	0.4	0.55	Fun	FBgn0039452	CG14245
PS534	PS534-RA	2	2	-	4930673	4931539	0.07	0.085	50.7	93.665	0.66	5.25	0	0.73	Fun	FBgn0040607	CG14244
PS535	PS535-RA	2	2	+	4935370	4941901	6.715	10.6	13.805	22.74	28.955	25.21	32.81	24.875	Dis	FBgn0266465	GckIII
PS536	PS536-RA	2	2	-	4941219	4973555	130.26	173.175	21.23	14.835	39.155	34.375	22.285	5.79	Fun	FBgn0014141	cher
PS536	PS536-RB	2	2	-	4941221	4945170	130.26	173.175	21.23	14.835	39.155	34.375	22.285	5.79	Fun	FBgn0014141	cher
PS536	PS536-RC	2	2	-	4941221	4949089	130.26	173.175	21.23	14.835	39.155	34.375	22.285	5.79	Fun	FBgn0014141	cher
PS536	PS536-RD	2	2	-	4941221	4949387	130.26	173.175	21.23	14.835	39.155	34.375	22.285	5.79	Fun	FBgn0014141	cher
PS536	PS536-RE	2	2	-	4941221	4949387	130.26	173.175	21.23	14.835	39.155	34.375	22.285	5.79	Fun	FBgn0014141	cher
PS536	PS536-RF	2	2	-	4941221	4978011	130.26	173.175	21.23	14.835	39.155	34.375	22.285	5.79	Fun	FBgn0014141	cher
PS536	PS536-RG	2	2	-	4941233	4977926	130.26	173.175	21.23	14.835	39.155	34.375	22.285	5.79	Fun	FBgn0014141	cher
PS537	PS537-RA	2	2	-	4978285	4979294	21.405	14.19	0.845	0.94	1.16	0.505	0.225	0	Fun	FBgn0038479	CG17477
PS538	PS538-RA	2	2	+	4979394	4981281	40.4	30.945	0.015	0	4.175	1.935	0	0.025	Dis	FBgn0051265	CG31265
PS539	PS539-RA	2	2	-	4981231	4982211	134.545	88.735	0	0.08	32.875	20.42	0.04	0.09	Fun	FBgn0038481	CG17475
PS540	PS540-RA	2	2	-	4982902	4983947	13.36	8.95	0	0	5.84	1.31	0	0	Dis	FBgn0038482	CG4053
PS541	PS541-RA	2	2	+	4984371	4987878	90.755	59.075	0.11	0.03	12.975	6.04	0	0.045	Fun	FBgn0051266	CG31266
PS542	PS542-RA	2	2	+	4988518	4989669	112.495	80.875	0.025	0	8.195	3.9	0	0.075	Fun	FBgn0038484	CG5246
PS543	PS543-RA	2	2	+	4990189	4991221	2.51	4.145	0.2	0.39	0	0.61	0	0.72	Dis	FBgn0038485	CG5255
PS544	PS544-RA	2	2	+	4991244	4992275	0	0.05	0	0.15	0	40.4	0	1.2	Dis	FBgn0038485	CG5255
PS545	PS545-RA	2	2	-	4992293	4993564	0	0	0	0.11	0	0.14	0	0.075	Sil	FBgn0038487	TwdlW
PS546	PS546-RA	2	2	-	4996025	4997307	0	2.305	0	12.78	0	18.895	0	43.305	Dis	FBgn0037788	CAH7
PS547	PS547-RA	2	2	-	4999918	5006423	41.66	62.97	161.285	144.835	20.28	41.93	1.5	3.055	Fun	FBgn0037788	CAH7
PS548	PS548-RA	2	2	+	5009894	5017886	15.735	22.87	54.55	52.36	69.66	29.165	46.69	16.845	Fun	FBgn0028734	Fmr1
PS548	PS548-RB	2	2	+	5009894	5017905	15.735	22.87	54.55	52.36	69.66	29.165	46.69	16.845	Fun	FBgn0028734	Fmr1
PS549	PS549-RA	2	2	-	5029559	5037693	0.615	0.445	0.3	0.96	1.135	3.27	0.46	0.21	Fun
PS550	PS550-RA	2	2	-	5047614	5051630	0	0.035	0.15	0.135	0.03	0.145	0	0.015	Sil	FBgn0041105	nerfin-2
PS551	PS551-RA	2	2	-	5053937	5056770	0	0	0	0	0	0	0	0	Sil	FBgn0053784	CG33784
PS552	PS552-RA	2	2	-	5057422	5062460	0	0	0	0	0	0	0.025	0	Sil	FBgn0053630	CG33630
PS553	PS553-RA	2	2	-	5063155	5064006	5.33	4.525	0	0	0	0.065	0	0.15	Fun	FBgn0037783	Npc2c
PS554	PS554-RA	2	2	+	5069429	5070248	101.935	73.845	0	0	5.23	25.88	0	0	Fun	FBgn0037782	Npc2d
PS555	PS555-RA	2	2	-	5071641	5073345	17.33	22.855	0.155	2.375	10.16	8.835	0	8.195	Fun	FBgn0051410	Npc2e
PS556	PS556-RA	2	2	+	5071706	5075208	1.925	3.315	0.59	2.79	11.59	7.52	28.05	11.165	Fun	FBgn0037781	Fancl
PS557	PS557-RA	2	2	-	5074957	5077453	7.725	12.85	21.13	31.09	13.695	49.54	20.505	80.61	Fun	FBgn0037780	ohgt
PS558	PS558-RA	2	2	+	5077715	5079186	82.94	78.74	117.975	100.52	45.065	16.3	50.995	8.825	Fun	FBgn0037779	CG12811
PS559	PS559-RA	2	2	-	5079145	5080958	3.05	3.53	3.4	2.95	10.79	2.7	9.155	0.65	Fun	FBgn0037778	mtTFB2
PS560	PS560-RA	2	2	+	5080905	5081898	7.75	9.92	12.62	16.59	26.885	18.47	18.69	5.82	Fun	FBgn0037777	CG11722
PS561	PS561-RA	2	2	-	5081857	5083302	28.625	39.895	55.885	57.33	61.34	21.405	103.32	30.005	Fun	FBgn0027524	CG3909
PS562	PS562-RA	2	2	+	5085518	5136826	3.645	9.33	162.5	212.26	13.81	48.93	17.05	177.155	Fun	FBgn0053208	Mical
PS562	PS562-RB	2	2	+	5111229	5136828	3.645	9.33	162.5	212.26	13.81	48.93	17.05	177.155	Fun	FBgn0053208	Mical
PS562	PS562-RC	2	2	+	5111229	5136828	3.645	9.33	162.5	212.26	13.81	48.93	17.05	177.155	Fun	FBgn0053208	Mical
PS562	PS562-RD	2	2	+	5111229	5136829	3.645	9.33	162.5	212.26	13.81	48.93	17.05	177.155	Fun	FBgn0053208	Mical
PS562	PS562-RE	2	2	+	5115661	5119658	3.645	9.33	162.5	212.26	13.81	48.93	17.05	177.155	Fun	FBgn0053208	Mical
PS562	PS562-RF	2	2	+	5115661	5136826	3.645	9.33	162.5	212.26	13.81	48.93	17.05	177.155	Fun	FBgn0053208	Mical
PS562	PS562-RG	2	2	+	5115661	5136826	3.645	9.33	162.5	212.26	13.81	48.93	17.05	177.155	Fun	FBgn0053208	Mical
PS563	PS563-RA	2	2	-	5115858	5116245	0	0	1.02	4.565	0	0	0	0.205	Dis
PS562	PS562-RH	2	2	+	5133940	5136828	3.645	9.33	162.5	212.26	13.81	48.93	17.05	177.155	Fun	FBgn0053208	Mical
PS564	PS564-RA	2	2	+	5137763	5139241	1.65	3.15	7.22	6.525	30.42	4.24	63.3	3.305	Fun	FBgn0037773	CG5359
PS564	PS564-RB	2	2	+	5137763	5139241	1.65	3.15	7.22	6.525	30.42	4.24	63.3	3.305	Fun	FBgn0037773	CG5359
PS564	PS564-RC	2	2	+	5137763	5139241	1.65	3.15	7.22	6.525	30.42	4.24	63.3	3.305	Fun	FBgn0037773	CG5359
PS565	PS565-RA	2	2	+	5142051	5145323	0	0	0	0	0	0	0	0	Sil-Dis	FBgn0045473	Gr85a
PS566	PS566-RA	2	2	-	5149604	5185316	7.07	18.015	38.9	31.795	14.77	27.265	3.06	2.01	Fun	FBgn0267336	Glut4EF
PS566	PS566-RB	2	2	-	5154769	5219315	7.07	18.015	38.9	31.795	14.77	27.265	3.06	2.01	Fun	FBgn0267336	Glut4EF
PS566	PS566-RC	2	2	-	5154769	5275674	7.07	18.015	38.9	31.795	14.77	27.265	3.06	2.01	Fun	FBgn0267336	Glut4EF
PS566	PS566-RD	2	2	-	5154771	5219354	7.07	18.015	38.9	31.795	14.77	27.265	3.06	2.01	Fun	FBgn0267336	Glut4EF
PS566	PS566-RE	2	2	-	5154776	5275404	7.07	18.015	38.9	31.795	14.77	27.265	3.06	2.01	Fun	FBgn0267336	Glut4EF
PS567	PS567-RA	2	2	+	5160482	5164133	6.89	9.19	22.18	21.03	50.8	4.21	37.61	2.505	Fun	FBgn0037770	Art4
PS566	PS566-RF	2	2	-	5264203	5275670	7.07	18.015	38.9	31.795	14.77	27.265	3.06	2.01	Fun	FBgn0267336	Glut4EF
PS568	PS568-RA	2	2	-	5281235	5285571	0.875	1.89	7.425	7.82	0.685	0.52	0.035	0.035	Fun
PS569	PS569-RA	2	2	+	5287252	5297981	0.9	0.955	0.69	0.375	0.55	1.62	0.01	0.03	Fun
PS570	PS570-RA	2	2	-	5287749	5289636	0.22	0.035	0.38	0.235	1.245	6.72	0	0	Fun	FBgn0038449	CG17562
PS571	PS571-RA	2	2	-	5290101	5291981	2.88	2.36	0.055	0.235	1.305	1.9	0	0	Fun	FBgn0038451	CG14893
PS572	PS572-RA	2	2	-	5292377	5294440	3.99	2.935	6.42	2.83	58.075	142.4	0.125	1.165	Fun	FBgn0038450	CG17560
PS573	PS573-RA	2	2	-	5294555	5296590	28.295	43.24	30.6	26.775	14.26	4.28	0.16	0.075	Fun	FBgn0038449	CG17562
PS574	PS574-RA	2	2	+	5299355	5302432	24.94	28.05	32.085	37.94	45.765	54.06	40.755	31.015	Fun	FBgn0022344	CG10340
PS575	PS575-RA	2	2	-	5302421	5303821	2.045	3.245	0.755	0.44	2.065	6.26	0	0	Fun	FBgn0027109	NPF
PS576	PS576-RA	2	2	+	5307978	5315251	1.395	0.575	0	0.06	4.115	20.27	0	0.295	Fun	FBgn0027562	CG10345
PS577	PS577-RA	2	2	+	5326975	5335960	29.355	14.98	4.56	4.8	22.98	70.395	0.06	0.085	Fun	FBgn0020907	Scp2
PS578	PS578-RA	2	2	+	5341231	5342265	2.245	2.215	3.175	4.05	13.685	4.82	21.79	3.545	Fun	FBgn0038446	CG14903
PS579	PS579-RA	2	2	-	5341852	5404150	1.62	3.055	31.31	22.29	0.7	3.085	0.085	2.86	Dis	FBgn0259244	CG42342
PS579	PS579-RB	2	2	-	5341852	5404152	1.62	3.055	31.31	22.29	0.7	3.085	0.085	2.86	Dis	FBgn0259244	CG42342
PS579	PS579-RC	2	2	-	5341852	5404152	1.62	3.055	31.31	22.29	0.7	3.085	0.085	2.86	Dis	FBgn0259244	CG42342
PS579	PS579-RD	2	2	-	5341852	5404152	1.62	3.055	31.31	22.29	0.7	3.085	0.085	2.86	Dis	FBgn0259244	CG42342
PS579	PS579-RE	2	2	-	5341852	5404152	1.62	3.055	31.31	22.29	0.7	3.085	0.085	2.86	Dis	FBgn0259244	CG42342
PS579	PS579-RF	2	2	-	5341852	5404152	1.62	3.055	31.31	22.29	0.7	3.085	0.085	2.86	Dis	FBgn0259244	CG42342
PS579	PS579-RG	2	2	-	5341881	5404150	1.62	3.055	31.31	22.29	0.7	3.085	0.085	2.86	Dis	FBgn0259244	CG42342
PS579	PS579-RH	2	2	-	5341881	5404150	1.62	3.055	31.31	22.29	0.7	3.085	0.085	2.86	Dis	FBgn0259244	CG42342
PS579	PS579-RI	2	2	-	5341881	5404150	1.62	3.055	31.31	22.29	0.7	3.085	0.085	2.86	Dis	FBgn0259244	CG42342
PS579	PS579-RJ	2	2	-	5341881	5404150	1.62	3.055	31.31	22.29	0.7	3.085	0.085	2.86	Dis	FBgn0259244	CG42342
PS579	PS579-RK	2	2	-	5341881	5404150	1.62	3.055	31.31	22.29	0.7	3.085	0.085	2.86	Dis	FBgn0259244	CG42342
PS579	PS579-RL	2	2	-	5341881	5404152	1.62	3.055	31.31	22.29	0.7	3.085	0.085	2.86	Dis	FBgn0259244	CG42342
PS580	PS580-RA	2	2	+	5369196	5370034	0	0	0.04	0.935	0	2.62	0	12.88	Fun
PS581	PS581-RA	2	2	+	5406287	5407541	48.285	44.63	0.18	0.07	7.81	9.825	0.04	0.165	Fun	FBgn0028381	Decay
PS582	PS582-RA	2	2	+	5407668	5408991	0.125	0.035	0.055	0	0.12	0.035	0	0.035	Sil	FBgn0038440	Gr89a
PS583	PS583-RA	2	2	+	5411296	5420513	0	0.055	5.38	1.71	0.015	1.145	0	1.525	Fun	FBgn0038439	Cad89D
PS584	PS584-RA	2	2	-	5422048	5423149	1.365	1.75	0.64	1.155	1.67	1.56	0.235	0.145	Fun	FBgn0042206	GstD10
PS585	PS585-RA	2	2	-	5423518	5424424	12.2	15.525	8.985	13.24	41.92	20.605	64.895	22.555	Fun	FBgn0038020	GstD9
PS586	PS586-RA	2	2	-	5424579	5425792	555.195	590.28	505.46	430.56	762.53	387.01	631.735	370.12	Fun	FBgn0001149	GstD1
PS587	PS587-RA	2	2	+	5427108	5429782	26.045	30.64	16.675	18.06	17.56	79.305	1.69	93.995	Fun	FBgn0010038	GstD2
PS587	PS587-RB	2	2	+	5427108	5429854	26.045	30.64	16.675	18.06	17.56	79.305	1.69	93.995	Fun	FBgn0010038	GstD2
PS588	PS588-RA	2	2	+	5430749	5431522	44.655	64.405	42.44	29.19	0.85	0.975	0	0.695	Fun	FBgn0010040	GstD4
PS589	PS589-RA	2	2	+	5432262	5433172	3.415	3.215	1.29	2.09	4.39	6.82	0.375	8.65	Fun	FBgn0010040	GstD4
PS590	PS590-RA	2	2	+	5434515	5435491	12.69	23.11	1.24	1.445	32.615	2.79	85.365	3.985	Fun	FBgn0010044	GstD8
PS591	PS591-RA	2	2	-	5436958	5437987	0	0	0.065	0.125	0.13	0.58	0	0.1	Sil	FBgn0038028	CG10035
PS592	PS592-RA	2	2	-	5439353	5439968	0	0	0	1.475	0	1.96	0	2.845	Fun
PS593	PS593-RA	2	2	+	5441597	5443368	0.095	0.06	0.04	0.455	5.05	29.3	0	4.96	Fun	FBgn0053098	CG33098
PS594	PS594-RA	2	2	+	5444286	5458968	30.925	27.675	11.39	9.915	47.26	19.695	36.015	6.615	Fun	FBgn0038038	Sccpdh2
PS594	PS594-RB	2	2	+	5444286	5458982	30.925	27.675	11.39	9.915	47.26	19.695	36.015	6.615	Fun	FBgn0038038	Sccpdh2
PS594	PS594-RC	2	2	+	5444286	5458982	30.925	27.675	11.39	9.915	47.26	19.695	36.015	6.615	Fun	FBgn0038038	Sccpdh2
PS595	PS595-RA	2	2	-	5444842	5447158	0.86	0.81	0.195	0.395	7.29	79.15	0.065	6.54	Fun	FBgn0038032	CG10096
PS596	PS596-RA	2	2	-	5449963	5456311	59.695	69.25	7.15	6.96	15.865	27.85	5.14	7.03	Fun	FBgn0038037	Cyp9f2
PS597	PS597-RA	2	2	-	5457240	5458658	0.115	0.61	0.045	1.805	0	7.56	0.03	16.3	Fun
PS594	PS594-RD	2	2	+	5457406	5458982	30.925	27.675	11.39	9.915	47.26	19.695	36.015	6.615	Fun	FBgn0038038	Sccpdh2
PS598	PS598-RA	2	2	+	5459090	5463396	10.61	20.69	28.245	36.445	18.07	98.325	33.585	237.195	Fun	FBgn0038039	CG5196
PS599	PS599-RA	2	2	-	5463159	5464952	68.375	71.525	75.92	73.525	42.54	36.6	82.91	47.69	Fun	FBgn0000455	Dip-C
PS600	PS600-RA	2	2	+	5465027	5473027	1.825	3.235	4.585	5.905	11.405	6.54	13.94	4.695	Fun	FBgn0082831	pps
PS600	PS600-RB	2	2	+	5465027	5473034	1.825	3.235	4.585	5.905	11.405	6.54	13.94	4.695	Fun	FBgn0082831	pps
PS601	PS601-RA	2	2	-	5472709	5474206	2.035	2.24	11.135	9.575	1.92	6.145	0.19	1.635	Dis	FBgn0038042	Scgbeta
PS602	PS602-RA	2	2	+	5474567	5475719	19.735	26.98	51.375	57.06	268.365	21.225	242.51	16.56	Fun	FBgn0038043	CG17202
PS602	PS602-RB	2	2	+	5474573	5475669	19.735	26.98	51.375	57.06	268.365	21.225	242.51	16.56	Fun	FBgn0038043	CG17202
PS603	PS603-RA	2	2	-	5475664	5477960	131	170.63	333.675	340.135	161.11	119.235	170.89	56.93	Fun	FBgn0004103	Pp1-87B
PS603	PS603-RB	2	2	-	5475664	5477960	131	170.63	333.675	340.135	161.11	119.235	170.89	56.93	Fun	FBgn0004103	Pp1-87B
PS603	PS603-RC	2	2	-	5475664	5477960	131	170.63	333.675	340.135	161.11	119.235	170.89	56.93	Fun	FBgn0004103	Pp1-87B
PS603	PS603-RD	2	2	-	5475664	5477960	131	170.63	333.675	340.135	161.11	119.235	170.89	56.93	Fun	FBgn0004103	Pp1-87B
PS604	PS604-RA	2	2	+	5476337	5477199	0.35	0.44	1.1	2.72	0.165	0	0	0.135	Fun
PS605	PS605-RA	2	2	+	5478153	5480360	3.715	5.12	13.235	14.685	8.68	14.27	12.55	34.155	Fun	FBgn0038045	NANS
PS606	PS606-RA	2	2	-	5479961	5481741	26.315	43.185	81.905	91.005	58.48	33.24	51.35	25.57	Fun	FBgn0038046	CG5641
PS607	PS607-RA	2	2	+	5481989	5483238	165.925	267.35	165.62	237.745	240.26	210.81	314.445	356.6	Fun	FBgn0086134	Prosalpha2
PS608	PS608-RA	2	2	-	5483159	5484519	25.76	44.065	58.905	79.56	121.95	73.75	153.375	161.75	Fun	FBgn0029512	Aos1
PS609	PS609-RA	2	2	+	5484345	5489166	791	470.99	91.035	93	342.175	368.235	268.48	200.345	Fun	FBgn0086687	Desat1
PS609	PS609-RB	2	2	+	5484345	5489166	791	470.99	91.035	93	342.175	368.235	268.48	200.345	Fun	FBgn0086687	Desat1
PS609	PS609-RC	2	2	+	5486359	5500064	791	470.99	91.035	93	342.175	368.235	268.48	200.345	Fun	FBgn0086687	Desat1
PS609	PS609-RD	2	2	+	5486410	5489166	791	470.99	91.035	93	342.175	368.235	268.48	200.345	Fun	FBgn0086687	Desat1
PS609	PS609-RE	2	2	+	5491439	5500146	791	470.99	91.035	93	342.175	368.235	268.48	200.345	Fun	FBgn0086687	Desat1
PS609	PS609-RF	2	2	+	5494980	5500146	791	470.99	91.035	93	342.175	368.235	268.48	200.345	Fun	FBgn0086687	Desat1
PS610	PS610-RA	2	2	+	5500952	5506703	14.195	31.93	23.295	26.235	22.34	19.065	19.56	13.385	Fun	FBgn0038053	CG18549
PS610	PS610-RB	2	2	+	5501087	5506703	14.195	31.93	23.295	26.235	22.34	19.065	19.56	13.385	Fun	FBgn0038053	CG18549
PS611	PS611-RA	2	2	-	5506985	5507998	2.375	17.035	2.71	64.695	3.005	71.485	3.11	115.72	Fun	FBgn0025637	SkpA
PS611	PS611-RB	2	2	-	5506985	5510208	2.375	17.035	2.71	64.695	3.005	71.485	3.11	115.72	Fun	FBgn0025637	SkpA
PS611	PS611-RC	2	2	-	5507000	5510208	2.375	17.035	2.71	64.695	3.005	71.485	3.11	115.72	Fun	FBgn0025637	SkpA
PS612	PS612-RA	2	2	+	5510163	5512169	6.365	7.795	13.185	15.835	40.585	13.93	56.175	8.425	Fun	FBgn0038055	trus
PS613	PS613-RA	2	2	-	5512187	5514021	15.71	16.405	22.455	21.395	35.97	13.69	36.82	7.905	Fun	FBgn0038056	CG5961
PS614	PS614-RA	2	2	+	5514039	5516336	5.015	7.825	10.22	9.015	17.01	4.56	10.935	2.105	Fun	FBgn0038057	CG12267
PS615	PS615-RA	2	2	-	5516202	5518974	4.915	7.85	9.655	8	16.06	7.115	16.075	2.46	Fun	FBgn0038058	CG5608
PS616	PS616-RA	2	2	-	5519431	5522086	257.41	415.28	9.77	10.265	2.485	3.035	5.285	4.835	Fun	FBgn0013279	Hsp70Bc
PS617	PS617-RA	2	2	+	5523323	5526260	399.73	605.805	15.61	17.77	3.09	4.595	7.875	9.135	Fun	FBgn0013279	Hsp70Bc
PS618	PS618-RA	2	2	-	5523776	5525132	1.325	1.53	0	0.11	0	0.03	0	0.035	Dis
PS619	PS619-RA	2	2	-	5525429	5530086	3.26	5.625	7.665	9.735	26.405	5.19	22.945	3.255	Dis	FBgn0278604	dmt
PS620	PS620-RA	2	2	+	5529835	5534717	2.905	5.31	7.245	13.675	23.34	47.785	21.16	44.87	Fun	FBgn0037734	trbd
PS621	PS621-RA	2	2	+	5535441	5545568	26.32	23.395	21.285	22.545	13.76	59.48	4.9	91.65	Fun	FBgn0051352	Unc-115a
PS621	PS621-RB	2	2	+	5535441	5545568	26.32	23.395	21.285	22.545	13.76	59.48	4.9	91.65	Fun	FBgn0051352	Unc-115a
PS622	PS622-RA	2	2	-	5537647	5541709	0.01	0.085	0.07	0.16	0.13	2.005	0.01	0.395	Dis
PS621	PS621-RC	2	2	+	5540370	5545568	26.32	23.395	21.285	22.545	13.76	59.48	4.9	91.65	Fun	FBgn0051352	Unc-115a
PS623	PS623-RA	2	2	-	5545470	5546770	4.305	8.92	13.79	16.19	21.19	15.485	29.6	9.9	Fun	FBgn0052939	CG32939
PS624	PS624-RA	2	2	+	5545687	5550607	5.29	7.485	16.345	16.04	11.66	7.81	11.965	6.93	Fun	FBgn0038870	Oga
PS625	PS625-RA	2	2	-	5550435	5551632	8.41	10.58	12.16	16.905	27.3	18.51	19.205	20.87	Fun	FBgn0038871	CG3337
PS625	PS625-RB	2	2	-	5550498	5551632	8.41	10.58	12.16	16.905	27.3	18.51	19.205	20.87	Fun	FBgn0038871	CG3337
PS626	PS626-RA	2	2	+	5551459	5557564	2.14	3.91	7.705	8.095	16.16	8.635	15.69	6.73	Fun	FBgn0038872	Nelf-A
PS627	PS627-RA	2	2	-	5558259	5566947	0.115	0.855	2.105	2.075	0.91	4.915	0	2.285	Fun	FBgn0000527	e
PS628	PS628-RA	2	2	+	5570871	5573677	0.565	0.865	0	0.06	7.455	12.135	0	0.34	Fun	FBgn0038873	CG5892
PS629	PS629-RA	2	2	+	5575342	5590417	1.59	1.675	0.34	0.565	0.185	0.875	0	0.58	Fun	FBgn0038874	ETHR
PS630	PS630-RA	2	2	-	5591940	5595057	84.76	108.185	112.115	102.705	155.79	142.035	310.34	207.015	Fun	FBgn0285937	Rab1
PS631	PS631-RA	2	2	-	5595150	5596082	29.805	47.32	86.34	90.64	79.545	43.66	477.68	380.885	Fun	FBgn0043012	AP-2sigma
PS632	PS632-RA	2	2	+	5596111	5597088	15.27	21.095	12.65	21.105	37.77	35.065	73.37	43.45	Fun	FBgn0038876	Idi
PS633	PS633-RA	2	2	-	5597088	5599624	28.075	33.615	31	26.775	63.955	50.88	93.005	18.14	Fun	FBgn0038877	CG3308
PS634	PS634-RA	2	2	-	5599688	5604217	2.21	2.725	2.765	3.595	7.215	1.84	7.485	0.93	Fun	FBgn0038878	CG3301
PS635	PS635-RA	2	2	+	5609177	5609797	0	0	2.775	1.68	0	0.945	0	0.94	Fun	FBgn0038879	CG17298
PS636	PS636-RA	2	2	-	5611225	5620386	0	0.015	0	0	0.01	0.14	0	0.08	Sil	FBgn0038880	SIFaR
PS637	PS637-RA	2	2	-	5643950	5676389	3.96	5.955	28.55	21.245	5.09	10.285	2.3	2.265	Dis	FBgn0038881	CG16791
PS637	PS637-RB	2	2	-	5643950	5676389	3.96	5.955	28.55	21.245	5.09	10.285	2.3	2.265	Dis	FBgn0038881	CG16791
PS637	PS637-RC	2	2	-	5643950	5676391	3.96	5.955	28.55	21.245	5.09	10.285	2.3	2.265	Dis	FBgn0038881	CG16791
PS638	PS638-RA	2	2	-	5677660	5703430	34.55	46.95	107.57	97.9	163.725	39.525	242.525	20.195	Dis	FBgn0002781	mod(mdg4)
PS638	PS638-RB	2	2	-	5677660	5703430	34.55	46.95	107.57	97.9	163.725	39.525	242.525	20.195	Dis	FBgn0002781	mod(mdg4)
PS638	PS638-RC	2	2	-	5677660	5703430	34.55	46.95	107.57	97.9	163.725	39.525	242.525	20.195	Dis	FBgn0002781	mod(mdg4)
PS638	PS638-RD	2	2	-	5677660	5703430	34.55	46.95	107.57	97.9	163.725	39.525	242.525	20.195	Dis	FBgn0002781	mod(mdg4)
PS638	PS638-RE	2	2	-	5677660	5703430	34.55	46.95	107.57	97.9	163.725	39.525	242.525	20.195	Dis	FBgn0002781	mod(mdg4)
PS638	PS638-RF	2	2	-	5677660	5703430	34.55	46.95	107.57	97.9	163.725	39.525	242.525	20.195	Dis	FBgn0002781	mod(mdg4)
PS638	PS638-RG	2	2	-	5677660	5703455	34.55	46.95	107.57	97.9	163.725	39.525	242.525	20.195	Dis	FBgn0002781	mod(mdg4)
PS638	PS638-RH	2	2	-	5677672	5703430	34.55	46.95	107.57	97.9	163.725	39.525	242.525	20.195	Dis	FBgn0002781	mod(mdg4)
PS639	PS639-RA	2	2	+	5678613	5680414	0	0.025	0.13	0.035	0.07	5.39	0.025	0.33	Fun
PS638	PS638-RI	2	2	-	5679195	5703430	34.55	46.95	107.57	97.9	163.725	39.525	242.525	20.195	Dis	FBgn0002781	mod(mdg4)
PS638	PS638-RJ	2	2	-	5679839	5703430	34.55	46.95	107.57	97.9	163.725	39.525	242.525	20.195	Dis	FBgn0002781	mod(mdg4)
PS638	PS638-RK	2	2	-	5682826	5703417	34.55	46.95	107.57	97.9	163.725	39.525	242.525	20.195	Dis	FBgn0002781	mod(mdg4)
PS638	PS638-RL	2	2	-	5684668	5686579	34.55	46.95	107.57	97.9	163.725	39.525	242.525	20.195	Dis	FBgn0002781	mod(mdg4)
PS640	PS640-RA	2	2	+	5686286	5689695	7.225	10.895	26.465	23.265	34.155	14.625	33.605	6.16	Fun	FBgn0261837	pre-mod(mdg4)-T
PS638	PS638-RM	2	2	-	5689211	5703430	34.55	46.95	107.57	97.9	163.725	39.525	242.525	20.195	Dis	FBgn0002781	mod(mdg4)
PS638	PS638-RN	2	2	-	5689211	5703430	34.55	46.95	107.57	97.9	163.725	39.525	242.525	20.195	Dis	FBgn0002781	mod(mdg4)
PS638	PS638-RO	2	2	-	5689417	5703417	34.55	46.95	107.57	97.9	163.725	39.525	242.525	20.195	Dis	FBgn0002781	mod(mdg4)
PS638	PS638-RP	2	2	-	5690166	5692364	34.55	46.95	107.57	97.9	163.725	39.525	242.525	20.195	Dis	FBgn0002781	mod(mdg4)
PS641	PS641-RA	2	2	+	5692567	5697381	1.31	1.635	5.19	4.895	5.53	3.165	7.11	2.605	Fun	FBgn0261844	pre-mod(mdg4)-V
PS638	PS638-RQ	2	2	-	5696582	5703430	34.55	46.95	107.57	97.9	163.725	39.525	242.525	20.195	Dis	FBgn0002781	mod(mdg4)
PS638	PS638-RR	2	2	-	5696785	5703417	34.55	46.95	107.57	97.9	163.725	39.525	242.525	20.195	Dis	FBgn0002781	mod(mdg4)
PS638	PS638-RS	2	2	-	5696785	5703455	34.55	46.95	107.57	97.9	163.725	39.525	242.525	20.195	Dis	FBgn0002781	mod(mdg4)
PS638	PS638-RT	2	2	-	5696785	5703455	34.55	46.95	107.57	97.9	163.725	39.525	242.525	20.195	Dis	FBgn0002781	mod(mdg4)
PS638	PS638-RU	2	2	-	5696818	5699872	34.55	46.95	107.57	97.9	163.725	39.525	242.525	20.195	Dis	FBgn0002781	mod(mdg4)
PS638	PS638-RV	2	2	-	5696818	5703430	34.55	46.95	107.57	97.9	163.725	39.525	242.525	20.195	Dis	FBgn0002781	mod(mdg4)
PS638	PS638-RW	2	2	-	5696818	5703455	34.55	46.95	107.57	97.9	163.725	39.525	242.525	20.195	Dis	FBgn0002781	mod(mdg4)
PS638	PS638-RX	2	2	-	5697347	5703455	34.55	46.95	107.57	97.9	163.725	39.525	242.525	20.195	Dis	FBgn0002781	mod(mdg4)
PS638	PS638-RY	2	2	-	5698380	5699872	34.55	46.95	107.57	97.9	163.725	39.525	242.525	20.195	Dis	FBgn0002781	mod(mdg4)
PS642	PS642-RA	2	2	+	5707166	5709784	0.06	0	0.25	0	0	0	0	0	Sil	FBgn0004110	tin
PS643	PS643-RA	2	2	+	5712640	5713469	0	0	0	0	0.13	3.695	0	0	Dis	FBgn0261294	CheB74a
PS644	PS644-RA	2	2	+	5717632	5717974	0.275	0	1.105	2.79	0.425	1.85	0	0	Dis	FBgn0004862	bap
PS645	PS645-RA	2	2	-	5729190	5730078	0	0	0	0	0	3.93	0	0	Dis	FBgn0261293	CheB53b
PS646	PS646-RA	2	2	+	5731186	5736096	0.625	0.33	0	0	0.285	0.555	0.04	0.205	Sil	FBgn0038076	Cyp313a4
PS647	PS647-RA	2	2	+	5738090	5740947	11.825	17.24	24.39	28.135	45.3	23.5	44.875	14.115	Fun	FBgn0026207	mbo
PS648	PS648-RA	2	2	-	5740823	5742294	44.215	38.29	2.14	5.905	19.08	19.34	0.14	2.025	Fun	FBgn0038074	Gnmt
PS649	PS649-RA	2	2	-	5742789	5749095	0.205	0.215	5.26	1.995	0.26	0.035	0	0.01	Fun	FBgn0038073	CG14395
PS650	PS650-RA	2	2	-	5756065	5762835	3.195	2.13	0.435	0.075	2.94	11.56	0.155	2.155	Fun	FBgn0038072	CG6225
PS651	PS651-RA	2	2	-	5764412	5769485	9.58	22.285	91.965	73.54	0.665	1.185	0.165	0.695	Dis	FBgn0038071	Dtg
PS652	PS652-RA	2	2	+	5775992	5776705	0.5	0	0.315	0.665	0.19	2.235	0	4.68	Dis	FBgn0038070	CG6753
PS653	PS653-RA	2	2	-	5778399	5779820	0	0	0.075	0.105	0	357.48	0.035	8.31	Dis	FBgn0042207	CG18530
PS654	PS654-RA	2	2	+	5781202	5784661	1.51	2.98	16.405	15.98	14.25	4.605	19.61	2.405	Fun	FBgn0038815	CG5466
PS654	PS654-RB	2	2	+	5781202	5784661	1.51	2.98	16.405	15.98	14.25	4.605	19.61	2.405	Fun	FBgn0038815	CG5466
PS655	PS655-RA	2	2	+	5785242	5792955	2.735	5.245	17.185	16.97	19.13	5.65	25.02	4.11	Fun	FBgn0001169	H
PS655	PS655-RB	2	2	+	5785242	5792955	2.735	5.245	17.185	16.97	19.13	5.65	25.02	4.11	Fun	FBgn0001169	H
PS655	PS655-RC	2	2	+	5785250	5792276	2.735	5.245	17.185	16.97	19.13	5.65	25.02	4.11	Fun	FBgn0001169	H
PS656	PS656-RA	2	2	-	5792177	5798022	4.28	6.72	13.91	15.065	25.54	9.13	21.44	4.865	Fun	FBgn0015279	Pi3K92E
PS656	PS656-RB	2	2	-	5792177	5798022	4.28	6.72	13.91	15.065	25.54	9.13	21.44	4.865	Fun	FBgn0015279	Pi3K92E
PS657	PS657-RA	2	2	+	5799221	5808291	2.235	4.1	7.97	7.075	3.16	4.35	2.235	2.28	Fun	FBgn0038816	Lrrk
PS657	PS657-RB	2	2	+	5799221	5808313	2.235	4.1	7.97	7.075	3.16	4.35	2.235	2.28	Fun	FBgn0038816	Lrrk
PS657	PS657-RC	2	2	+	5799967	5808290	2.235	4.1	7.97	7.075	3.16	4.35	2.235	2.28	Fun	FBgn0038816	Lrrk
PS658	PS658-RA	2	2	-	5808240	5815686	2.49	1.835	0.885	0.92	0.515	2.03	0.255	1.345	Fun	FBgn0028422	GluRIID
PS659	PS659-RA	2	2	-	5815904	5823241	0.81	4.85	4.11	17.965	0.99	32.615	0	55.11	Dis	FBgn0038818	Nep4
PS660	PS660-RA	2	2	+	5832817	5835754	12.46	5.96	3.21	1.835	25.63	136.515	0	5.395	Fun	FBgn0038819	Cpr92F
PS661	PS661-RA	2	2	-	5839977	5841173	0	0	12.085	7.415	130.995	433.9	0	1.81	Fun	FBgn0038820	CG4000
PS661	PS661-RB	2	2	-	5839977	5841173	0	0	12.085	7.415	130.995	433.9	0	1.81	Fun	FBgn0038820	CG4000
PS662	PS662-RA	2	2	-	5851657	5853361	0.23	0.34	1.265	0.76	0.77	1.99	2.975	0.05	Dis	FBgn0024944	Oamb
PS663	PS663-RA	2	2	-	5853939	5878017	0.145	0.125	0.32	0.17	2.88	2.445	7.075	0.28	Dis	FBgn0024944	Oamb
PS664	PS664-RA	2	2	+	5899179	5901475	0.26	0.96	8.28	4.39	0.035	0.135	0.425	0.11	Fun	FBgn0051205	CG31205
PS665	PS665-RA	2	2	+	5902837	5913217	11.465	20.005	34.94	46.505	59.8	9.66	78.915	9.94	Fun	FBgn0004107	Cdk2
PS665	PS665-RB	2	2	+	5902888	5904770	11.465	20.005	34.94	46.505	59.8	9.66	78.915	9.94	Fun	FBgn0004107	Cdk2
PS666	PS666-RA	2	2	-	5909553	5911887	0	0.025	2.86	2.35	22.87	60.13	0.135	1.755	Fun	FBgn0051199	CG31199
PS666	PS666-RB	2	2	-	5910767	5911887	0	0.025	2.86	2.35	22.87	60.13	0.135	1.755	Fun	FBgn0051199	CG31199
PS667	PS667-RA	2	2	+	5915704	5921917	0.675	0.705	3.365	3.08	2.4	10.68	0.115	0.12	Dis	FBgn0259222	CG42322
PS668	PS668-RA	2	2	+	5921998	5972959	98.25	178.56	426.155	450.025	17.57	626.84	7.89	868.465	Dis	FBgn0038826	Syp
PS668	PS668-RB	2	2	+	5921998	5972959	98.25	178.56	426.155	450.025	17.57	626.84	7.89	868.465	Dis	FBgn0038826	Syp
PS668	PS668-RC	2	2	+	5921998	5972959	98.25	178.56	426.155	450.025	17.57	626.84	7.89	868.465	Dis	FBgn0038826	Syp
PS669	PS669-RA	2	2	-	5922551	5928031	10.82	14.74	50.06	41.92	20.35	6.97	21.295	5.725	Fun	FBgn0051195	CG31195
PS670	PS670-RA	2	2	-	5937426	5939510	3.15	4.055	3.31	2.24	0.79	1.365	0	0	Fun	FBgn0046689	Takl1
PS668	PS668-RD	2	2	+	5950425	5973434	98.25	178.56	426.155	450.025	17.57	626.84	7.89	868.465	Dis	FBgn0038826	Syp
PS668	PS668-RE	2	2	+	5950425	5973434	98.25	178.56	426.155	450.025	17.57	626.84	7.89	868.465	Dis	FBgn0038826	Syp
PS668	PS668-RF	2	2	+	5950459	5973434	98.25	178.56	426.155	450.025	17.57	626.84	7.89	868.465	Dis	FBgn0038826	Syp
PS668	PS668-RG	2	2	+	5950459	5973434	98.25	178.56	426.155	450.025	17.57	626.84	7.89	868.465	Dis	FBgn0038826	Syp
PS668	PS668-RH	2	2	+	5950608	5972959	98.25	178.56	426.155	450.025	17.57	626.84	7.89	868.465	Dis	FBgn0038826	Syp
PS668	PS668-RI	2	2	+	5950647	5973434	98.25	178.56	426.155	450.025	17.57	626.84	7.89	868.465	Dis	FBgn0038826	Syp
PS668	PS668-RJ	2	2	+	5950647	5973434	98.25	178.56	426.155	450.025	17.57	626.84	7.89	868.465	Dis	FBgn0038826	Syp
PS668	PS668-RK	2	2	+	5950647	5973434	98.25	178.56	426.155	450.025	17.57	626.84	7.89	868.465	Dis	FBgn0038826	Syp
PS668	PS668-RL	2	2	+	5950647	5973434	98.25	178.56	426.155	450.025	17.57	626.84	7.89	868.465	Dis	FBgn0038826	Syp
PS671	PS671-RA	2	2	-	5951020	5958895	0.5	1.025	3.755	3.925	0	0	0	0.905	Dis
PS668	PS668-RM	2	2	+	5956373	5973434	98.25	178.56	426.155	450.025	17.57	626.84	7.89	868.465	Dis	FBgn0038826	Syp
PS668	PS668-RN	2	2	+	5956524	5973434	98.25	178.56	426.155	450.025	17.57	626.84	7.89	868.465	Dis	FBgn0038826	Syp
PS668	PS668-RO	2	2	+	5956524	5973434	98.25	178.56	426.155	450.025	17.57	626.84	7.89	868.465	Dis	FBgn0038826	Syp
PS668	PS668-RP	2	2	+	5956542	5972959	98.25	178.56	426.155	450.025	17.57	626.84	7.89	868.465	Dis	FBgn0038826	Syp
PS668	PS668-RQ	2	2	+	5956542	5973434	98.25	178.56	426.155	450.025	17.57	626.84	7.89	868.465	Dis	FBgn0038826	Syp
PS672	PS672-RA	2	2	+	5975423	5979302	31.46	62.46	241.775	222.01	11.16	42.025	1.455	7.155	Fun
PS673	PS673-RA	2	2	-	5977815	5983229	1.895	2.645	3.025	3.895	8.805	2.535	7.3	1.605	Fun	FBgn0038827	Fancd2
PS674	PS674-RA	2	2	-	5983554	5985660	1.995	3.035	26.15	27.705	5.645	5.2	6.695	1.42	Fun	FBgn0038828	CG17270
PS675	PS675-RA	2	2	-	5985843	5988755	63.58	55.325	60.395	60.96	55.865	54.575	36.45	44.555	Fun	FBgn0038829	CG17271
PS675	PS675-RB	2	2	-	5985931	5989016	63.58	55.325	60.395	60.96	55.865	54.575	36.45	44.555	Fun	FBgn0038829	CG17271
PS675	PS675-RC	2	2	-	5986188	5988822	63.58	55.325	60.395	60.96	55.865	54.575	36.45	44.555	Fun	FBgn0038829	CG17271
PS675	PS675-RD	2	2	-	5986202	5988696	63.58	55.325	60.395	60.96	55.865	54.575	36.45	44.555	Fun	FBgn0038829	CG17271
PS675	PS675-RE	2	2	-	5986639	5989016	63.58	55.325	60.395	60.96	55.865	54.575	36.45	44.555	Fun	FBgn0038829	CG17271
PS676	PS676-RA	2	2	+	5988996	5996683	22.83	17.345	11.995	13.915	24.915	26.135	16.4	23.445	Fun	FBgn0039044	p53
PS676	PS676-RB	2	2	+	5989007	6002137	22.83	17.345	11.995	13.915	24.915	26.135	16.4	23.445	Fun	FBgn0039044	p53
PS676	PS676-RC	2	2	+	5989526	5996679	22.83	17.345	11.995	13.915	24.915	26.135	16.4	23.445	Fun	FBgn0039044	p53
PS676	PS676-RD	2	2	+	5993337	5996886	22.83	17.345	11.995	13.915	24.915	26.135	16.4	23.445	Fun	FBgn0039044	p53
PS676	PS676-RE	2	2	+	5993401	6002137	22.83	17.345	11.995	13.915	24.915	26.135	16.4	23.445	Fun	FBgn0039044	p53
PS676	PS676-RF	2	2	+	5993401	6002179	22.83	17.345	11.995	13.915	24.915	26.135	16.4	23.445	Fun	FBgn0039044	p53
PS677	PS677-RA	2	2	+	5997090	5998928	0	0	0	0	0	0	0	0	Sil
PS678	PS678-RA	2	2	-	5998937	6000309	0.075	0.115	0.045	0.395	0.03	0	0	0.035	Sil	FBgn0041225	Gr94a
PS679	PS679-RA	2	2	+	6004052	6007986	10.65	13.3	31.06	35.28	7.78	11.85	7.62	10.43	Fun	FBgn0039043	CG17121
PS680	PS680-RA	2	2	-	6010045	6010770	0	1.455	0.215	4.97	0	86.715	0.085	951.425	Fun	FBgn0039041	CG13838
PS680	PS680-RB	2	2	-	6010067	6010770	0	1.455	0.215	4.97	0	86.715	0.085	951.425	Fun	FBgn0039041	CG13838
PS681	PS681-RA	2	2	+	6017271	6018752	0.165	0.255	0.235	0.25	3.59	26.735	0	1.65	Fun	FBgn0039040	CG13833
PS682	PS682-RA	2	2	+	6025666	6031738	0.12	0.04	3.41	2.16	0.05	0.045	0	0.02	Fun	FBgn0039039	lmd
PS683	PS683-RA	2	2	-	6038264	6041041	1.07	0.63	1.35	1.48	0.675	4.06	0.02	1.95	Fun	FBgn0039038	CG6688
PS684	PS684-RA	2	2	+	6042743	6055993	0.98	0.975	2.4	1.735	2.205	2.4	1.81	1.605	Fun	FBgn0085404	CG34375
PS685	PS685-RA	2	2	+	6058775	6077732	6.475	4.465	0.82	0.95	3.15	5.225	0.395	1.095	Fun	FBgn0263390	Nha2
PS685	PS685-RB	2	2	+	6064299	6077732	6.475	4.465	0.82	0.95	3.15	5.225	0.395	1.095	Fun	FBgn0263390	Nha2
PS686	PS686-RA	2	2	-	6069969	6071343	0	0	0	0.055	0	0	0.035	0	Sil	FBgn0039033	Or94a
PS687	PS687-RA	2	2	-	6104548	6113201	1.325	1.735	16.935	14	1.455	5.8	0.045	0.255	Fun	FBgn0017590	klg
PS688	PS688-RA	2	2	+	6138042	6139820	0	0.755	0	5.435	0	27.655	0	61.59	Fun	FBgn0039029	CG4704
PS688	PS688-RB	2	2	+	6138042	6140216	0	0.755	0	5.435	0	27.655	0	61.59	Fun	FBgn0039029	CG4704
PS689	PS689-RA	2	2	+	6176801	6178321	0.035	0.04	3.635	4.5	0.055	0.14	0	0	Fun	FBgn0039028	CG13840
PS690	PS690-RA	2	2	-	6191106	6193372	0.315	0.195	6.845	5.16	0.02	0	0	0	Fun	FBgn0039027	CG7031
PS691	PS691-RA	2	2	+	6209885	6210768	0	0.19	0.12	10.25	0.05	105.855	0	276.01	Fun
PS692	PS692-RA	2	2	-	6212660	6225706	12.935	17.885	35.99	36.855	38.88	35.97	43.965	18.74	Fun	FBgn0039026	CG7029
PS692	PS692-RB	2	2	-	6212660	6258287	12.935	17.885	35.99	36.855	38.88	35.97	43.965	18.74	Fun	FBgn0039026	CG7029
PS692	PS692-RC	2	2	-	6212662	6225777	12.935	17.885	35.99	36.855	38.88	35.97	43.965	18.74	Fun	FBgn0039026	CG7029
PS692	PS692-RD	2	2	-	6212662	6225777	12.935	17.885	35.99	36.855	38.88	35.97	43.965	18.74	Fun	FBgn0039026	CG7029
PS692	PS692-RE	2	2	-	6212662	6258293	12.935	17.885	35.99	36.855	38.88	35.97	43.965	18.74	Fun	FBgn0039026	CG7029
PS692	PS692-RF	2	2	-	6212663	6225704	12.935	17.885	35.99	36.855	38.88	35.97	43.965	18.74	Fun	FBgn0039026	CG7029
PS692	PS692-RG	2	2	-	6212664	6258293	12.935	17.885	35.99	36.855	38.88	35.97	43.965	18.74	Fun	FBgn0039026	CG7029
PS692	PS692-RH	2	2	-	6212665	6258303	12.935	17.885	35.99	36.855	38.88	35.97	43.965	18.74	Fun	FBgn0039026	CG7029
PS692	PS692-RI	2	2	-	6212665	6258303	12.935	17.885	35.99	36.855	38.88	35.97	43.965	18.74	Fun	FBgn0039026	CG7029
PS692	PS692-RJ	2	2	-	6212666	6258285	12.935	17.885	35.99	36.855	38.88	35.97	43.965	18.74	Fun	FBgn0039026	CG7029
PS692	PS692-RK	2	2	-	6233044	6258287	12.935	17.885	35.99	36.855	38.88	35.97	43.965	18.74	Fun	FBgn0039026	CG7029
PS692	PS692-RL	2	2	-	6233044	6258287	12.935	17.885	35.99	36.855	38.88	35.97	43.965	18.74	Fun	FBgn0039026	CG7029
PS692	PS692-RM	2	2	-	6233046	6258293	12.935	17.885	35.99	36.855	38.88	35.97	43.965	18.74	Fun	FBgn0039026	CG7029
PS692	PS692-RN	2	2	-	6233048	6258293	12.935	17.885	35.99	36.855	38.88	35.97	43.965	18.74	Fun	FBgn0039026	CG7029
PS692	PS692-RO	2	2	-	6233048	6258293	12.935	17.885	35.99	36.855	38.88	35.97	43.965	18.74	Fun	FBgn0039026	CG7029
PS693	PS693-RA	2	2	+	6239646	6240627	0.23	0	0.115	0.22	12.065	38.275	0	0.2	Dis
PS694	PS694-RA	2	2	+	6240728	6242403	0.035	0	0.06	0.07	0.54	1.88	0	0	Fun	FBgn0040588	CG13841
PS695	PS695-RA	2	2	+	6242873	6247804	11.065	12.05	13.075	13.805	2.065	2.745	0.095	0.4	Fun	FBgn0039023	Nepl14
PS696	PS696-RA	2	2	+	6248689	6251595	2.66	2.235	0.88	0.575	0.705	0.64	0.05	0.015	Fun	FBgn0039022	Nepl13
PS697	PS697-RA	2	2	+	6258275	6262514	2.19	4.62	8.675	13.235	10.935	58.11	17.25	119.69	Fun	FBgn0086253	rumi
PS697	PS697-RB	2	2	+	6258385	6262514	2.19	4.62	8.675	13.235	10.935	58.11	17.25	119.69	Fun	FBgn0086253	rumi
PS698	PS698-RA	2	2	-	6262291	6263351	25.14	39.665	69.585	60.98	36.605	15.93	40.35	8.235	Fun	FBgn0039019	HP1c
PS698	PS698-RB	2	2	-	6262291	6263351	25.14	39.665	69.585	60.98	36.605	15.93	40.35	8.235	Fun	FBgn0039019	HP1c
PS698	PS698-RC	2	2	-	6262291	6266074	25.14	39.665	69.585	60.98	36.605	15.93	40.35	8.235	Fun	FBgn0039019	HP1c
PS698	PS698-RD	2	2	-	6262291	6270779	25.14	39.665	69.585	60.98	36.605	15.93	40.35	8.235	Fun	FBgn0039019	HP1c
PS699	PS699-RA	2	2	+	6266057	6268695	5	6.53	6.29	8.54	33.865	2.475	31.135	1.33	Fun	FBgn0263143	vret
PS700	PS700-RA	2	2	+	6272198	6279745	4.245	4.415	5.82	4.925	19.34	3.59	21.815	1.975	Fun	FBgn0039016	Dcr-1
PS701	PS701-RA	2	2	+	6281312	6281767	1.13	2.52	0.605	0.635	1.125	2.355	0.125	0.435	Dis	FBgn0026323	Tak1
PS702	PS702-RA	2	2	-	6281591	6286396	11.92	17.625	43.08	39.505	23.205	25.51	18.545	4.835	Fun	FBgn0266409	CG45049
PS702	PS702-RB	2	2	-	6281591	6286506	11.92	17.625	43.08	39.505	23.205	25.51	18.545	4.835	Fun	FBgn0266409	CG45049
PS702	PS702-RC	2	2	-	6281598	6286506	11.92	17.625	43.08	39.505	23.205	25.51	18.545	4.835	Fun	FBgn0266409	CG45049
PS703	PS703-RA	2	2	+	6286707	6288246	2.845	4.805	6.67	8.07	12.8	4.85	19.975	4.05	Fun	FBgn0039013	CG4813
PS704	PS704-RA	2	2	+	6290239	6293527	8.965	13.15	13.035	13.06	14.675	6.43	18.7	3.18	Fun	FBgn0024958	Irp-1A
PS705	PS705-RA	2	2	+	6294484	6304885	5.23	6.245	11.19	10.105	14.085	10.52	11.79	4.495	Fun	FBgn0051151	wge
PS705	PS705-RB	2	2	+	6294484	6304885	5.23	6.245	11.19	10.105	14.085	10.52	11.79	4.495	Fun	FBgn0051151	wge
PS705	PS705-RC	2	2	+	6294491	6304882	5.23	6.245	11.19	10.105	14.085	10.52	11.79	4.495	Fun	FBgn0051151	wge
PS705	PS705-RD	2	2	+	6294491	6304882	5.23	6.245	11.19	10.105	14.085	10.52	11.79	4.495	Fun	FBgn0051151	wge
PS705	PS705-RE	2	2	+	6294491	6304882	5.23	6.245	11.19	10.105	14.085	10.52	11.79	4.495	Fun	FBgn0051151	wge
PS705	PS705-RF	2	2	+	6294491	6304884	5.23	6.245	11.19	10.105	14.085	10.52	11.79	4.495	Fun	FBgn0051151	wge
PS706	PS706-RA	2	2	-	6308230	6310503	25.425	27.445	64.715	38.58	6.93	23.79	0.56	1.885	Fun	FBgn0039008	CG6972
PS707	PS707-RA	2	2	+	6311048	6312103	0.45	0.745	0.615	0.3	0.22	2.155	0	0.575	Fun	FBgn0039007	CCAP
PS708	PS708-RA	2	2	-	6312850	6314931	15.705	9.26	2.475	2.595	2.48	5.78	0.065	1.925	Fun	FBgn0039006	Cyp6d4
PS709	PS709-RA	2	2	-	6315042	6322474	2.85	3.075	5.255	4.845	9.7	4.25	7.125	2.475	Fun	FBgn0038344	obe
PS709	PS709-RB	2	2	-	6315074	6322423	2.85	3.075	5.255	4.845	9.7	4.25	7.125	2.475	Fun	FBgn0038344	obe
PS710	PS710-RA	2	2	+	6323360	6324170	0.765	0.63	2.3	4.53	2.125	7.26	0	0.59	Fun	FBgn0038343	Trissin
PS711	PS711-RA	2	2	-	6324216	6325780	5.355	3.46	0.04	0.22	4.89	13.2	0.055	0.21	Fun	FBgn0019940	Rh6
PS712	PS712-RA	2	2	-	6326007	6330193	0.41	6.385	9.975	28.64	1.59	22.61	0.715	110.685	Fun	FBgn0038342	B9d1
PS712	PS712-RB	2	2	-	6326007	6335151	0.41	6.385	9.975	28.64	1.59	22.61	0.715	110.685	Fun	FBgn0038342	B9d1
PS712	PS712-RC	2	2	-	6326031	6334506	0.41	6.385	9.975	28.64	1.59	22.61	0.715	110.685	Fun	FBgn0038342	B9d1
PS712	PS712-RD	2	2	-	6326031	6334506	0.41	6.385	9.975	28.64	1.59	22.61	0.715	110.685	Fun	FBgn0038342	B9d1
PS712	PS712-RE	2	2	-	6326033	6335105	0.41	6.385	9.975	28.64	1.59	22.61	0.715	110.685	Fun	FBgn0038342	B9d1
PS713	PS713-RA	2	2	+	6332468	6366132	1.155	2.02	3.81	2.92	6.23	4.5	1.695	0.395	Dis	FBgn0286071	AdamTS-A
PS713	PS713-RB	2	2	+	6345882	6368286	1.155	2.02	3.81	2.92	6.23	4.5	1.695	0.395	Dis	FBgn0286071	AdamTS-A
PS714	PS714-RA	2	2	-	6366093	6368319	0.025	0.255	720.4	260.195	282.32	1410.73	0	0.085	Fun	FBgn0000047	Act88F
PS714	PS714-RB	2	2	-	6366093	6368319	0.025	0.255	720.4	260.195	282.32	1410.73	0	0.085	Fun	FBgn0000047	Act88F
PS715	PS715-RA	2	2	-	6370196	6373882	0	6.68	0	53.76	0.325	146.51	0.325	215.325	Fun	FBgn0042177	Arts
PS716	PS716-RA	2	2	-	6373990	6376397	6.545	6.7	3.56	3.15	57.26	3.02	65.44	0.35	Fun	FBgn0037548	CG7900
PS717	PS717-RA	2	2	-	6379135	6381746	7.84	6.48	4.805	19.01	30.05	79.8	0.175	29.025	Fun	FBgn0037547	CG7910
PS717	PS717-RB	2	2	-	6379231	6381709	7.84	6.48	4.805	19.01	30.05	79.8	0.175	29.025	Fun	FBgn0037547	CG7910
PS718	PS718-RA	2	2	-	6381827	6386762	0.405	0.445	1.85	1.77	2.3	2.165	0.765	0.995	Fun	FBgn0037546	mAChR-B
PS719	PS719-RA	2	2	-	6423336	6424101	0.085	0.1	0.21	0.765	0.135	37.985	0	99.22	Fun
PS720	PS720-RA	2	2	-	6426214	6453625	1.525	3.095	9.725	5.425	0.85	34.06	0.615	2.88	Fun
PS720	PS720-RB	2	2	-	6426214	6453625	1.525	3.095	9.725	5.425	0.85	34.06	0.615	2.88	Fun
PS721	PS721-RA	2	2	+	6428825	6433145	4.78	10.655	3.375	2.35	1.395	1.46	0.06	0.615	Fun	FBgn0038897	CG5849
PS722	PS722-RA	2	2	+	6434020	6437219	209.43	100.4	0.07	0	21.175	17.105	0.015	0.095	Fun	FBgn0051343	CG31343
PS723	PS723-RA	2	2	+	6438788	6442028	22.41	20.265	0.18	0.085	31.055	57.995	0.015	0.05	Dis	FBgn0051233	CG31233
PS724	PS724-RA	2	2	+	6443597	6446947	84.515	29.52	0.53	0.26	46.965	32.925	0.18	0.065	Fun	FBgn0051198	CG31198
PS725	PS725-RA	2	2	+	6449442	6452593	10.87	7.77	1.52	0.83	2.79	3.985	0.015	0.115	Dis	FBgn0259237	CG42335
PS726	PS726-RA	2	2	+	6452772	6453901	0.05	0.24	2.655	2.725	0	0.05	0.04	0.65	Fun	FBgn0038901	Burs
PS727	PS727-RA	2	2	-	6453835	6457695	0.625	0.705	5.88	5.02	2.365	5.74	0.705	0.765	Fun	FBgn0027575	GABA-B-R2
PS727	PS727-RB	2	2	-	6453836	6459326	0.625	0.705	5.88	5.02	2.365	5.74	0.705	0.765	Fun	FBgn0027575	GABA-B-R2
PS728	PS728-RA	2	2	-	6460009	6461311	1.4	2.71	3.32	3.39	10.6	1.315	8.61	1.575	Fun	FBgn0038903	RpI12
PS729	PS729-RA	2	2	-	6462785	6464756	0	1.69	0.015	14.07	0	122.29	0.025	282.38	Fun	FBgn0034800	CG3788
PS730	PS730-RA	2	2	-	6465500	6507862	8.03	9.97	56.485	64.605	23.66	33.325	21.515	4.825	Fun	FBgn0013759	CASK
PS730	PS730-RB	2	2	-	6465502	6478741	8.03	9.97	56.485	64.605	23.66	33.325	21.515	4.825	Fun	FBgn0013759	CASK
PS730	PS730-RC	2	2	-	6470195	6495698	8.03	9.97	56.485	64.605	23.66	33.325	21.515	4.825	Fun	FBgn0013759	CASK
PS730	PS730-RD	2	2	-	6470195	6507862	8.03	9.97	56.485	64.605	23.66	33.325	21.515	4.825	Fun	FBgn0013759	CASK
PS730	PS730-RE	2	2	-	6478856	6495703	8.03	9.97	56.485	64.605	23.66	33.325	21.515	4.825	Fun	FBgn0013759	CASK
PS730	PS730-RF	2	2	-	6478857	6507830	8.03	9.97	56.485	64.605	23.66	33.325	21.515	4.825	Fun	FBgn0013759	CASK
PS731	PS731-RA	2	2	+	6517608	6519804	0.025	0.11	0.11	0.615	0	3.725	0.015	5.54	Fun	FBgn0041229	Gr93a
PS732	PS732-RA	2	2	-	6527512	6533072	0	0.01	0.065	0.015	0	0.01	0	0	Sil	FBgn0045470	Gr93b
PS733	PS733-RA	2	2	-	6536548	6542367	9.03	37.215	189.62	148.125	41.075	26.025	47.46	6.975	Fun
PS734	PS734-RA	2	2	+	6551698	6554337	13.515	17.72	16.105	25.47	23.37	26.085	23.51	57.41	Fun	FBgn0260940	lsn
PS734	PS734-RB	2	2	+	6551698	6555207	13.515	17.72	16.105	25.47	23.37	26.085	23.51	57.41	Fun	FBgn0260940	lsn
PS734	PS734-RC	2	2	+	6551698	6555207	13.515	17.72	16.105	25.47	23.37	26.085	23.51	57.41	Fun	FBgn0260940	lsn
PS734	PS734-RD	2	2	+	6551698	6555207	13.515	17.72	16.105	25.47	23.37	26.085	23.51	57.41	Fun	FBgn0260940	lsn
PS735	PS735-RA	2	2	-	6552602	6556476	0.295	1.84	0.955	11.61	3.05	47.32	0.46	61.335	Fun	FBgn0038909	CG6569
PS735	PS735-RB	2	2	-	6552938	6556476	0.295	1.84	0.955	11.61	3.05	47.32	0.46	61.335	Fun	FBgn0038909	CG6569
PS735	PS735-RC	2	2	-	6552938	6560988	0.295	1.84	0.955	11.61	3.05	47.32	0.46	61.335	Fun	FBgn0038909	CG6569
PS735	PS735-RD	2	2	-	6552938	6560988	0.295	1.84	0.955	11.61	3.05	47.32	0.46	61.335	Fun	FBgn0038909	CG6569
PS736	PS736-RA	2	2	+	6555807	6561186	3.86	7.73	3.945	22.07	7.16	189.25	3.025	366.835	Dis	FBgn0053092	P5CDh2
PS736	PS736-RB	2	2	+	6555927	6566050	3.86	7.73	3.945	22.07	7.16	189.25	3.025	366.835	Dis	FBgn0053092	P5CDh2
PS736	PS736-RC	2	2	+	6561405	6566051	3.86	7.73	3.945	22.07	7.16	189.25	3.025	366.835	Dis	FBgn0053092	P5CDh2
PS737	PS737-RA	2	2	-	6562752	6564096	1.835	2.92	3.74	5.1	3.33	6.26	5.71	21.96	Fun	FBgn0083984	CG34148
PS738	PS738-RA	2	2	+	6566124	6569426	0	3.405	0.08	31.2	0.03	56.895	0.015	64.275	Fun	FBgn0051465	CG31465
PS739	PS739-RA	2	2	-	6569285	6569753	0	0	0	0.165	1603.18	8.335	25.99	9.91	Dis	FBgn0038914	fit
PS740	PS740-RA	2	2	-	6570019	6572058	0.215	1.325	14.185	14.11	8.625	25.93	9.665	66.975	Fun	FBgn0038916	dnd
PS740	PS740-RB	2	2	-	6570936	6574075	0.215	1.325	14.185	14.11	8.625	25.93	9.665	66.975	Fun	FBgn0038916	dnd
PS741	PS741-RA	2	2	+	6571441	6574125	1.81	2.71	8.015	6.965	10.305	3.385	12.635	2.46	Fun	FBgn0038917	CG6678
PS742	PS742-RA	2	2	-	6574394	6575443	0	5.335	1.5	29.685	0	101.105	0	420.925	Fun	FBgn0051482	CG31482
PS743	PS743-RA	2	2	+	6575646	6576284	0	2.03	0	12.095	0	13.71	0	168.17	Fun
PS744	PS744-RA	2	2	+	6600683	6603627	6.275	2.935	15.225	16.42	1.42	29.795	0	0.675	Dis	FBgn0038919	Qsox2
PS745	PS745-RA	2	2	+	6636499	6704071	2.06	7.66	495.12	507.19	9.33	31.05	2.09	3.36	Fun	FBgn0264490	Eip93F
PS745	PS745-RB	2	2	+	6636499	6704122	2.06	7.66	495.12	507.19	9.33	31.05	2.09	3.36	Fun	FBgn0264490	Eip93F
PS745	PS745-RC	2	2	+	6636499	6704122	2.06	7.66	495.12	507.19	9.33	31.05	2.09	3.36	Fun	FBgn0264490	Eip93F
PS745	PS745-RD	2	2	+	6636501	6704122	2.06	7.66	495.12	507.19	9.33	31.05	2.09	3.36	Fun	FBgn0264490	Eip93F
PS745	PS745-RE	2	2	+	6637291	6704122	2.06	7.66	495.12	507.19	9.33	31.05	2.09	3.36	Fun	FBgn0264490	Eip93F
PS745	PS745-RF	2	2	+	6664465	6704122	2.06	7.66	495.12	507.19	9.33	31.05	2.09	3.36	Fun	FBgn0264490	Eip93F
PS745	PS745-RG	2	2	+	6664555	6704071	2.06	7.66	495.12	507.19	9.33	31.05	2.09	3.36	Fun	FBgn0264490	Eip93F
PS745	PS745-RH	2	2	+	6664555	6704071	2.06	7.66	495.12	507.19	9.33	31.05	2.09	3.36	Fun	FBgn0264490	Eip93F
PS745	PS745-RI	2	2	+	6664555	6704071	2.06	7.66	495.12	507.19	9.33	31.05	2.09	3.36	Fun	FBgn0264490	Eip93F
PS745	PS745-RJ	2	2	+	6664555	6704122	2.06	7.66	495.12	507.19	9.33	31.05	2.09	3.36	Fun	FBgn0264490	Eip93F
PS745	PS745-RK	2	2	+	6664555	6710092	2.06	7.66	495.12	507.19	9.33	31.05	2.09	3.36	Fun	FBgn0264490	Eip93F
PS745	PS745-RL	2	2	+	6664555	6710805	2.06	7.66	495.12	507.19	9.33	31.05	2.09	3.36	Fun	FBgn0264490	Eip93F
PS746	PS746-RA	2	2	-	6667943	6689021	0	0	5.11	7.475	0	0.11	0	0	Dis
PS747	PS747-RA	2	2	-	6681792	6682549	0	1.67	0	12.41	0	39.285	0	295.56	Fun	FBgn0015286	Rala
PS748	PS748-RA	2	2	-	6706076	6707092	0	0.145	6.9	7.22	0	0.05	0	0	Fun
PS749	PS749-RA	2	2	+	6721205	6722705	0	5.54	0	27.72	0	209.855	0	384.635	Fun	FBgn0038921	Theg
PS750	PS750-RA	2	2	-	6722657	6730006	53.89	47.115	27.48	44.595	88.945	212.935	71.48	177.04	Dis	FBgn0019960	Mitofilin
PS750	PS750-RB	2	2	-	6726296	6730028	53.89	47.115	27.48	44.595	88.945	212.935	71.48	177.04	Dis	FBgn0019960	Mitofilin
PS751	PS751-RA	2	2	+	6729322	6730765	29.035	29.51	38.54	43.59	52.25	33.12	41.445	40.395	Fun	FBgn0038923	mRpL35
PS752	PS752-RA	2	2	-	6730718	6731826	142.4	108.69	31.435	25.875	104.435	28.65	100.425	6.62	Fun	FBgn0038924	CG6028
PS753	PS753-RA	2	2	+	6731940	6735639	3	3.885	7.345	8.095	15.88	3.655	19.395	1.655	Fun	FBgn0039696	Rnb
PS754	PS754-RA	2	2	-	6735470	6736910	8.135	14.465	5.595	4.595	1.765	0.165	2.17	0.2	Fun	FBgn0262112	sro
PS754	PS754-RB	2	2	-	6735526	6737020	8.135	14.465	5.595	4.595	1.765	0.165	2.17	0.2	Fun	FBgn0262112	sro
PS755	PS755-RA	2	2	-	6737545	6771383	27.77	35.185	18.32	18.275	22.03	59.075	6.025	8.255	Dis	FBgn0001297	kay
PS755	PS755-RB	2	2	-	6737594	6743300	27.77	35.185	18.32	18.275	22.03	59.075	6.025	8.255	Dis	FBgn0001297	kay
PS755	PS755-RC	2	2	-	6737594	6750505	27.77	35.185	18.32	18.275	22.03	59.075	6.025	8.255	Dis	FBgn0001297	kay
PS755	PS755-RD	2	2	-	6737674	6762566	27.77	35.185	18.32	18.275	22.03	59.075	6.025	8.255	Dis	FBgn0001297	kay
PS756	PS756-RA	2	2	+	6753317	6754655	0	1.965	0	15.38	0	82.855	0	222.445	Fun	FBgn0039694	fig
PS757	PS757-RA	2	2	-	6779547	6785467	3.935	5.4	7.18	8.295	13.965	10.13	13.045	7.24	Fun	FBgn0260990	yata
PS757	PS757-RB	2	2	-	6779706	6785467	3.935	5.4	7.18	8.295	13.965	10.13	13.045	7.24	Fun	FBgn0260990	yata
PS758	PS758-RA	2	2	+	6785426	6786705	504.15	451.93	243.825	220.475	505.155	925.13	151.41	33.76	Fun	FBgn0020235	ATPsyngamma
PS758	PS758-RB	2	2	+	6785426	6786705	504.15	451.93	243.825	220.475	505.155	925.13	151.41	33.76	Fun	FBgn0020235	ATPsyngamma
PS758	PS758-RC	2	2	+	6785434	6786705	504.15	451.93	243.825	220.475	505.155	925.13	151.41	33.76	Fun	FBgn0020235	ATPsyngamma
PS759	PS759-RA	2	2	-	6786685	6788938	16.67	19.205	20.59	24.625	56.775	11.38	52.19	7.22	Fun	FBgn0039691	IntS11
PS760	PS760-RA	2	2	-	6789783	6792136	0	0.905	0	2.03	0.035	1.995	0.02	1.79	Dis	FBgn0261793	Trf2
PS761	PS761-RA	2	2	+	6792645	6793560	9.025	15.38	20.895	21.075	59.885	59.05	128.515	183.6	Fun	FBgn0038675	CG6013
PS762	PS762-RA	2	2	+	6794841	6806259	0.07	0.11	0.37	0.205	0.005	0.075	0	0.095	Sil	FBgn0038676	CG6026
PS763	PS763-RA	2	2	-	6806929	6865207	4.595	5.13	15.04	16.945	17.11	39.71	22.02	56.695	Fun	FBgn0004876	cdi
PS763	PS763-RB	2	2	-	6806929	6865207	4.595	5.13	15.04	16.945	17.11	39.71	22.02	56.695	Fun	FBgn0004876	cdi
PS763	PS763-RC	2	2	-	6806991	6865204	4.595	5.13	15.04	16.945	17.11	39.71	22.02	56.695	Fun	FBgn0004876	cdi
PS763	PS763-RD	2	2	-	6807008	6822132	4.595	5.13	15.04	16.945	17.11	39.71	22.02	56.695	Fun	FBgn0004876	cdi
PS763	PS763-RE	2	2	-	6807008	6865207	4.595	5.13	15.04	16.945	17.11	39.71	22.02	56.695	Fun	FBgn0004876	cdi
PS764	PS764-RA	2	2	-	6830776	6835919	0.555	0.695	5.23	7.905	0.15	0.53	0.085	0.26	Fun
PS765	PS765-RA	2	2	+	6869119	6903591	2.7	3.375	10.32	8.255	3.77	4.805	1.115	4.9	Fun	FBgn0038679	CG6040
PS766	PS766-RA	2	2	+	6904697	6906843	168.745	146.045	4.79	3.12	28.115	41.07	0.355	3.12	Fun	FBgn0038681	Cyp12a4
PS766	PS766-RB	2	2	+	6904697	6909170	168.745	146.045	4.79	3.12	28.115	41.07	0.355	3.12	Fun	FBgn0038681	Cyp12a4
PS766	PS766-RC	2	2	+	6907180	6909170	168.745	146.045	4.79	3.12	28.115	41.07	0.355	3.12	Fun	FBgn0038681	Cyp12a4
PS766	PS766-RD	2	2	+	6907180	6912054	168.745	146.045	4.79	3.12	28.115	41.07	0.355	3.12	Fun	FBgn0038681	Cyp12a4
PS766	PS766-RE	2	2	+	6907180	6912054	168.745	146.045	4.79	3.12	28.115	41.07	0.355	3.12	Fun	FBgn0038681	Cyp12a4
PS766	PS766-RF	2	2	+	6907180	6915372	168.745	146.045	4.79	3.12	28.115	41.07	0.355	3.12	Fun	FBgn0038681	Cyp12a4
PS766	PS766-RG	2	2	+	6907180	6915372	168.745	146.045	4.79	3.12	28.115	41.07	0.355	3.12	Fun	FBgn0038681	Cyp12a4
PS766	PS766-RH	2	2	+	6907180	6915372	168.745	146.045	4.79	3.12	28.115	41.07	0.355	3.12	Fun	FBgn0038681	Cyp12a4
PS766	PS766-RI	2	2	+	6913435	6915815	168.745	146.045	4.79	3.12	28.115	41.07	0.355	3.12	Fun	FBgn0038681	Cyp12a4
PS767	PS767-RA	2	2	-	6915415	6923446	3.63	3.71	9.96	7.8	18.02	6.63	14.91	5.16	Fun	FBgn0261285	Ppcs
PS768	PS768-RA	2	2	-	6923731	6928555	12.585	11.69	24.14	18.645	11.735	23.15	3.695	2.745	Fun	FBgn0038682	CG5835
PS769	PS769-RA	2	2	-	6929930	6932708	7.965	12.425	10.065	25.31	40.32	110.25	85.285	160.5	Fun	FBgn0038683	CG11779
PS769	PS769-RB	2	2	-	6929934	6934846	7.965	12.425	10.065	25.31	40.32	110.25	85.285	160.5	Fun	FBgn0038683	CG11779
PS770	PS770-RA	2	2	+	6932451	6935297	0.04	0.31	0.06	1.86	95.535	2.22	170.785	4.58	Dis	FBgn0002962	nos
PS771	PS771-RA	2	2	-	6935004	6937296	6.08	9.5	7.905	10.34	32.62	6.94	47.035	8.72	Fun	FBgn0259704	Nsun5
PS772	PS772-RA	2	2	-	6939372	6948985	5.415	3.895	7.89	3.08	0.815	2.255	0.05	0.01	Fun	FBgn0262717	Skeletor
PS772	PS772-RB	2	2	-	6939383	6948963	5.415	3.895	7.89	3.08	0.815	2.255	0.05	0.01	Fun	FBgn0262717	Skeletor
PS773	PS773-RA	2	2	+	6955199	6958088	39.555	29.715	27.4	21.19	61.615	36.875	41.02	3.615	Fun	FBgn0037819	CG14688
PS774	PS774-RA	2	2	+	6958150	6961958	7.945	11.1	2.125	3.57	3.53	18.745	0.14	31.38	Fun	FBgn0037818	CG6465
PS774	PS774-RB	2	2	+	6958448	6961999	7.945	11.1	2.125	3.57	3.53	18.745	0.14	31.38	Fun	FBgn0037818	CG6465
PS774	PS774-RC	2	2	+	6958692	6961999	7.945	11.1	2.125	3.57	3.53	18.745	0.14	31.38	Fun	FBgn0037818	CG6465
PS775	PS775-RA	2	2	+	7003000	7140035	12.08	20.82	109.45	115.685	1.805	7.795	0.035	0.515	Fun	FBgn0001235	hth
PS775	PS775-RB	2	2	+	7029849	7081484	12.08	20.82	109.45	115.685	1.805	7.795	0.035	0.515	Fun	FBgn0001235	hth
PS776	PS776-RA	2	2	+	7149206	7198981	0	0	0	0	0	0	0	0.01	Sil
PS777	PS777-RA	2	2	-	7210698	7212728	16.11	10.275	0.295	0.665	3.47	5.115	2.235	0.81	Fun	FBgn0037817	Cyp12e1
PS778	PS778-RA	2	2	+	7231452	7233447	4.98	5.435	5.46	6.08	11.315	6.335	6.17	1.725	Fun	FBgn0037816	CG6345
PS779	PS779-RA	2	2	-	7233297	7234226	4.565	6.76	7.315	12.075	36.615	5.045	35.29	5.255	Fun	FBgn0037815	Rrp46
PS780	PS780-RA	2	2	+	7234473	7238838	26.765	20.99	32.485	28.62	34.31	15.91	21.89	2.08	Fun	FBgn0024957	Irp-1B
PS780	PS780-RB	2	2	+	7234554	7238838	26.765	20.99	32.485	28.62	34.31	15.91	21.89	2.08	Fun	FBgn0024957	Irp-1B
PS781	PS781-RA	2	2	-	7236813	7239328	0	0	0	0.03	35.455	0	6.625	0.015	Fun
PS782	PS782-RA	2	2	+	7240282	7244147	2.645	5.37	5.01	9.3	7.57	6.6	7.475	5.97	Fun	FBgn0037814	CG6325
PS783	PS783-RA	2	2	-	7244075	7246177	0.275	0.715	5.85	3.78	0.045	0.045	0	0.025	Fun	FBgn0045443	mthl11
PS784	PS784-RA	2	2	-	7246506	7248691	0	0	0.06	0.19	0.025	0.19	0	0.05	Sil	FBgn0045443	mthl11
PS785	PS785-RA	2	2	-	7248814	7267589	4.9	5.34	7.305	9.15	5.69	67.34	2.895	72.595	Fun	FBgn0259938	cwo
PS785	PS785-RB	2	2	-	7248814	7267589	4.9	5.34	7.305	9.15	5.69	67.34	2.895	72.595	Fun	FBgn0259938	cwo
PS785	PS785-RC	2	2	-	7248814	7267589	4.9	5.34	7.305	9.15	5.69	67.34	2.895	72.595	Fun	FBgn0259938	cwo
PS785	PS785-RD	2	2	-	7248816	7261033	4.9	5.34	7.305	9.15	5.69	67.34	2.895	72.595	Fun	FBgn0259938	cwo
PS785	PS785-RE	2	2	-	7248819	7260752	4.9	5.34	7.305	9.15	5.69	67.34	2.895	72.595	Fun	FBgn0259938	cwo
PS785	PS785-RF	2	2	-	7263557	7267589	4.9	5.34	7.305	9.15	5.69	67.34	2.895	72.595	Fun	FBgn0259938	cwo
PS786	PS786-RA	2	2	+	7268329	7285505	1.01	1.81	5.035	5.105	7.78	2.785	6.49	1.48	Fun	FBgn0020379	Rfx
PS786	PS786-RB	2	2	+	7268329	7285505	1.01	1.81	5.035	5.105	7.78	2.785	6.49	1.48	Fun	FBgn0020379	Rfx
PS786	PS786-RC	2	2	+	7279770	7285341	1.01	1.81	5.035	5.105	7.78	2.785	6.49	1.48	Fun	FBgn0020379	Rfx
PS787	PS787-RA	2	2	-	7285637	7286572	0	5.035	0.04	27.425	0	72.86	0.06	236.34	Fun
PS788	PS788-RA	2	2	-	7286751	7299758	5.31	6.93	23.355	23.365	18.065	2.35	26.475	1.625	Fun	FBgn0015396	jumu
PS788	PS788-RB	2	2	-	7286751	7299758	5.31	6.93	23.355	23.365	18.065	2.35	26.475	1.625	Fun	FBgn0015396	jumu
PS789	PS789-RA	2	2	-	7301043	7302920	0.035	0.855	0.11	2	0.385	2.34	0.48	2.13	NA	FBgn0000246	c(3)G
PS790	PS790-RA	2	2	-	7303926	7311628	5.925	13.17	8.625	27.18	75.625	27.82	54.88	20.695	Fun	FBgn0037810	sle
PS790	PS790-RB	2	2	-	7303926	7311628	5.925	13.17	8.625	27.18	75.625	27.82	54.88	20.695	Fun	FBgn0037810	sle
PS790	PS790-RC	2	2	-	7303926	7311852	5.925	13.17	8.625	27.18	75.625	27.82	54.88	20.695	Fun	FBgn0037810	sle
PS790	PS790-RD	2	2	-	7303930	7311852	5.925	13.17	8.625	27.18	75.625	27.82	54.88	20.695	Fun	FBgn0037810	sle
PS791	PS791-RA	2	2	+	7310884	7332048	4.875	8.345	8.85	13.385	10.445	23.07	7.11	16.635	Dis	FBgn0266717	Bruce
PS791	PS791-RB	2	2	+	7310884	7332048	4.875	8.345	8.85	13.385	10.445	23.07	7.11	16.635	Dis	FBgn0266717	Bruce
PS791	PS791-RC	2	2	+	7310884	7332075	4.875	8.345	8.85	13.385	10.445	23.07	7.11	16.635	Dis	FBgn0266717	Bruce
PS791	PS791-RD	2	2	+	7310884	7332148	4.875	8.345	8.85	13.385	10.445	23.07	7.11	16.635	Dis	FBgn0266717	Bruce
PS791	PS791-RE	2	2	+	7312169	7332079	4.875	8.345	8.85	13.385	10.445	23.07	7.11	16.635	Dis	FBgn0266717	Bruce
PS791	PS791-RF	2	2	+	7312179	7332074	4.875	8.345	8.85	13.385	10.445	23.07	7.11	16.635	Dis	FBgn0266717	Bruce
PS791	PS791-RG	2	2	+	7313446	7332075	4.875	8.345	8.85	13.385	10.445	23.07	7.11	16.635	Dis	FBgn0266717	Bruce
PS791	PS791-RH	2	2	+	7320892	7332079	4.875	8.345	8.85	13.385	10.445	23.07	7.11	16.635	Dis	FBgn0266717	Bruce
PS792	PS792-RA	2	2	+	7333355	7336974	1.275	0.615	0.615	0.495	39.17	8.205	56.025	0.765	Fun	FBgn0037807	CG6293
PS793	PS793-RA	2	2	-	7336197	7399445	4.935	6.64	5.71	10.295	16.675	20.215	15.995	16.44	Fun	FBgn0262617	Nuak
PS793	PS793-RB	2	2	-	7336210	7399454	4.935	6.64	5.71	10.295	16.675	20.215	15.995	16.44	Fun	FBgn0262617	Nuak
PS793	PS793-RC	2	2	-	7336220	7399474	4.935	6.64	5.71	10.295	16.675	20.215	15.995	16.44	Fun	FBgn0262617	Nuak
PS793	PS793-RD	2	2	-	7336231	7354898	4.935	6.64	5.71	10.295	16.675	20.215	15.995	16.44	Fun	FBgn0262617	Nuak
PS793	PS793-RE	2	2	-	7341953	7399474	4.935	6.64	5.71	10.295	16.675	20.215	15.995	16.44	Fun	FBgn0262617	Nuak
PS794	PS794-RA	2	2	-	7399697	7401925	13.7	26.17	21.29	84.74	49.935	61.67	41.145	64.645	Fun	FBgn0040078	pont
PS795	PS795-RA	2	2	-	7406485	7418908	42.76	49.135	36.46	35.485	3.15	13.545	0.16	9.62	Fun	FBgn0037801	CG3999
PS795	PS795-RB	2	2	-	7406485	7420854	42.76	49.135	36.46	35.485	3.15	13.545	0.16	9.62	Fun	FBgn0037801	CG3999
PS795	PS795-RC	2	2	-	7406485	7420856	42.76	49.135	36.46	35.485	3.15	13.545	0.16	9.62	Fun	FBgn0037801	CG3999
PS795	PS795-RD	2	2	-	7406485	7420862	42.76	49.135	36.46	35.485	3.15	13.545	0.16	9.62	Fun	FBgn0037801	CG3999
PS795	PS795-RE	2	2	-	7406485	7420862	42.76	49.135	36.46	35.485	3.15	13.545	0.16	9.62	Fun	FBgn0037801	CG3999
PS795	PS795-RF	2	2	-	7406485	7420862	42.76	49.135	36.46	35.485	3.15	13.545	0.16	9.62	Fun	FBgn0037801	CG3999
PS795	PS795-RG	2	2	-	7406485	7420862	42.76	49.135	36.46	35.485	3.15	13.545	0.16	9.62	Fun	FBgn0037801	CG3999
PS795	PS795-RH	2	2	-	7408934	7420862	42.76	49.135	36.46	35.485	3.15	13.545	0.16	9.62	Fun	FBgn0037801	CG3999
PS795	PS795-RI	2	2	-	7409681	7410012	42.76	49.135	36.46	35.485	3.15	13.545	0.16	9.62	Fun	FBgn0037801	CG3999
PS796	PS796-RA	2	2	-	7410209	7428296	0.08	0.51	0.425	3.88	1	13.525	0	8.365	Dis	FBgn0261928	CG42795
PS796	PS796-RB	2	2	-	7410442	7428296	0.08	0.51	0.425	3.88	1	13.525	0	8.365	Dis	FBgn0261928	CG42795
PS795	PS795-RJ	2	2	-	7417357	7420834	42.76	49.135	36.46	35.485	3.15	13.545	0.16	9.62	Fun	FBgn0037801	CG3999
PS795	PS795-RK	2	2	-	7417357	7420862	42.76	49.135	36.46	35.485	3.15	13.545	0.16	9.62	Fun	FBgn0037801	CG3999
PS796	PS796-RC	2	2	-	7421007	7428296	0.08	0.51	0.425	3.88	1	13.525	0	8.365	Dis	FBgn0261928	CG42795
PS796	PS796-RD	2	2	-	7422535	7428296	0.08	0.51	0.425	3.88	1	13.525	0	8.365	Dis	FBgn0261928	CG42795
PS797	PS797-RA	2	2	-	7441256	7444022	0	0.04	0	0.05	0	0.7	0	0.325	Sil	FBgn0039004	Nup133
PS798	PS798-RA	2	2	-	7445314	7445914	0	4.485	0.61	51.98	0	74.405	0	135.87	Fun	FBgn0083943	CG34107
PS799	PS799-RA	2	2	+	7445882	7446945	0.06	0.56	6.96	6.485	0.84	4.155	0	5.365	Fun	FBgn0037798	CG12817
PS800	PS800-RA	2	2	-	7448263	7474503	0.21	0.195	1.3	0.995	0.63	3.045	0.02	0.075	Fun	FBgn0004575	Syn
PS801	PS801-RA	2	2	+	7457720	7467721	9.605	10.995	7.125	6.115	13.94	28.855	5.535	13.905	Fun	FBgn0025879	Timp
PS802	PS802-RA	2	2	+	7475272	7491915	7.395	8.72	15.245	12.58	3.2	10.73	0.175	0.25	Fun	FBgn0037796	CG12814
PS802	PS802-RB	2	2	+	7475284	7491911	7.395	8.72	15.245	12.58	3.2	10.73	0.175	0.25	Fun	FBgn0037796	CG12814
PS802	PS802-RC	2	2	+	7475284	7491913	7.395	8.72	15.245	12.58	3.2	10.73	0.175	0.25	Fun	FBgn0037796	CG12814
PS802	PS802-RD	2	2	+	7475285	7491911	7.395	8.72	15.245	12.58	3.2	10.73	0.175	0.25	Fun	FBgn0037796	CG12814
PS803	PS803-RA	2	2	+	7493490	7501343	5.645	8.02	9.315	6.385	23.235	7.245	18.5	1.345	Fun	FBgn0040238	Best1
PS803	PS803-RB	2	2	+	7493490	7501343	5.645	8.02	9.315	6.385	23.235	7.245	18.5	1.345	Fun	FBgn0040238	Best1
PS803	PS803-RC	2	2	+	7493494	7501341	5.645	8.02	9.315	6.385	23.235	7.245	18.5	1.345	Fun	FBgn0040238	Best1
PS803	PS803-RD	2	2	+	7493494	7501341	5.645	8.02	9.315	6.385	23.235	7.245	18.5	1.345	Fun	FBgn0040238	Best1
PS804	PS804-RA	2	2	+	7503726	7506273	1.495	2.89	5.195	5.815	10.115	7.235	10.24	7.475	Fun	FBgn0037794	CG6254
PS805	PS805-RA	2	2	-	7505717	7519076	3.31	7.81	13.545	11.045	16.75	9.08	16.515	6.905	Fun	FBgn0086359	Invadolysin
PS806	PS806-RA	2	2	+	7519944	7522333	0	0.965	0	9.185	0	35.685	0	46.755	Fun	FBgn0061197	salto
PS807	PS807-RA	2	2	-	7522310	7523507	3.945	6.77	4.925	8.54	10.27	8.475	15.72	18.905	Fun	FBgn0038491	CG5292
PS808	PS808-RA	2	2	-	7523572	7525744	2.47	5.895	6.245	13.27	17.705	15.93	21.405	32.685	Fun	FBgn0038490	CG5285
PS808	PS808-RB	2	2	-	7523701	7525913	2.47	5.895	6.245	13.27	17.705	15.93	21.405	32.685	Fun	FBgn0038490	CG5285
PS809	PS809-RA	2	2	+	7525549	7529749	1.14	7.71	3.59	48.69	9.87	169.775	12.285	207.595	Fun	FBgn0038488	m-cup
PS809	PS809-RB	2	2	+	7525554	7529727	1.14	7.71	3.59	48.69	9.87	169.775	12.285	207.595	Fun	FBgn0038488	m-cup
PS810	PS810-RA	2	2	-	7530595	7530886	0	0	0	0	0	0	0	0	NA	FBgn0001321	knk
PS811	PS811-RA	2	2	-	7536070	7539018	9.325	13.395	23.855	19.975	0.265	3.335	0.07	4.615	Dis	FBgn0001321	knk
PS812	PS812-RA	2	2	-	7539844	7559358	16.64	26.365	42.935	61.54	87.75	37.98	65.18	23.19	Fun	FBgn0037792	TAF1B
PS812	PS812-RB	2	2	-	7540028	7550303	16.64	26.365	42.935	61.54	87.75	37.98	65.18	23.19	Fun	FBgn0037792	TAF1B
PS812	PS812-RC	2	2	-	7540028	7550500	16.64	26.365	42.935	61.54	87.75	37.98	65.18	23.19	Fun	FBgn0037792	TAF1B
PS812	PS812-RD	2	2	-	7540028	7550500	16.64	26.365	42.935	61.54	87.75	37.98	65.18	23.19	Fun	FBgn0037792	TAF1B
PS812	PS812-RE	2	2	-	7540028	7559336	16.64	26.365	42.935	61.54	87.75	37.98	65.18	23.19	Fun	FBgn0037792	TAF1B
PS812	PS812-RF	2	2	-	7540133	7550298	16.64	26.365	42.935	61.54	87.75	37.98	65.18	23.19	Fun	FBgn0037792	TAF1B
PS812	PS812-RG	2	2	-	7540133	7550298	16.64	26.365	42.935	61.54	87.75	37.98	65.18	23.19	Fun	FBgn0037792	TAF1B
PS812	PS812-RH	2	2	-	7540150	7550303	16.64	26.365	42.935	61.54	87.75	37.98	65.18	23.19	Fun	FBgn0037792	TAF1B
PS812	PS812-RI	2	2	-	7540150	7559354	16.64	26.365	42.935	61.54	87.75	37.98	65.18	23.19	Fun	FBgn0037792	TAF1B
PS813	PS813-RA	2	2	-	7560126	7564447	0.11	1.86	0.395	4.125	1.29	5.31	1.55	4.405	Dis	FBgn0035842	Setx
PS814	PS814-RA	2	2	-	7565857	7596582	2.87	4.055	17.165	12.375	8.095	3.75	8.385	0.99	Fun	FBgn0262127	kibra
PS815	PS815-RA	2	2	-	7597519	7603035	3.3	7.665	4.39	5.045	29.345	20.94	50.99	12.795	Fun	FBgn0038256	CG7530
PS815	PS815-RB	2	2	-	7597519	7606905	3.3	7.665	4.39	5.045	29.345	20.94	50.99	12.795	Fun	FBgn0038256	CG7530
PS816	PS816-RA	2	2	-	7608010	7618796	174.685	176.285	264.32	202.94	448.575	400.3	402.35	312.765	Fun
PS816	PS816-RB	2	2	-	7608567	7615654	174.685	176.285	264.32	202.94	448.575	400.3	402.35	312.765	Fun
PS816	PS816-RC	2	2	-	7608567	7618812	174.685	176.285	264.32	202.94	448.575	400.3	402.35	312.765	Fun
PS816	PS816-RD	2	2	-	7608568	7618812	174.685	176.285	264.32	202.94	448.575	400.3	402.35	312.765	Fun
PS816	PS816-RE	2	2	-	7608568	7618812	174.685	176.285	264.32	202.94	448.575	400.3	402.35	312.765	Fun
PS816	PS816-RF	2	2	-	7608607	7619943	174.685	176.285	264.32	202.94	448.575	400.3	402.35	312.765	Fun
PS817	PS817-RA	2	2	+	7618582	7699958	4.58	6.105	18.69	18.3	10.43	8.15	10.125	4.25	Dis	FBgn0263929	jvl
PS817	PS817-RB	2	2	+	7618582	7699998	4.58	6.105	18.69	18.3	10.43	8.15	10.125	4.25	Dis	FBgn0263929	jvl
PS818	PS818-RA	2	2	-	7624573	7637043	43.185	35.715	0.4	0.76	28.685	119.31	1.015	1.215	Fun	FBgn0038257	smp-30
PS818	PS818-RB	2	2	-	7624727	7626106	43.185	35.715	0.4	0.76	28.685	119.31	1.015	1.215	Fun	FBgn0038257	smp-30
PS818	PS818-RC	2	2	-	7624727	7637040	43.185	35.715	0.4	0.76	28.685	119.31	1.015	1.215	Fun	FBgn0038257	smp-30
PS818	PS818-RD	2	2	-	7624727	7637043	43.185	35.715	0.4	0.76	28.685	119.31	1.015	1.215	Fun	FBgn0038257	smp-30
PS818	PS818-RE	2	2	-	7624727	7637043	43.185	35.715	0.4	0.76	28.685	119.31	1.015	1.215	Fun	FBgn0038257	smp-30
PS818	PS818-RF	2	2	-	7624727	7637043	43.185	35.715	0.4	0.76	28.685	119.31	1.015	1.215	Fun	FBgn0038257	smp-30
PS818	PS818-RG	2	2	-	7624727	7637043	43.185	35.715	0.4	0.76	28.685	119.31	1.015	1.215	Fun	FBgn0038257	smp-30
PS818	PS818-RH	2	2	-	7624747	7637043	43.185	35.715	0.4	0.76	28.685	119.31	1.015	1.215	Fun	FBgn0038257	smp-30
PS817	PS817-RC	2	2	+	7628871	7700005	4.58	6.105	18.69	18.3	10.43	8.15	10.125	4.25	Dis	FBgn0263929	jvl
PS817	PS817-RD	2	2	+	7628871	7700005	4.58	6.105	18.69	18.3	10.43	8.15	10.125	4.25	Dis	FBgn0263929	jvl
PS817	PS817-RE	2	2	+	7630484	7700005	4.58	6.105	18.69	18.3	10.43	8.15	10.125	4.25	Dis	FBgn0263929	jvl
PS817	PS817-RF	2	2	+	7630674	7700005	4.58	6.105	18.69	18.3	10.43	8.15	10.125	4.25	Dis	FBgn0263929	jvl
PS817	PS817-RG	2	2	+	7684139	7699998	4.58	6.105	18.69	18.3	10.43	8.15	10.125	4.25	Dis	FBgn0263929	jvl
PS819	PS819-RA	2	2	+	7700856	7703619	1.055	5.14	3.4	2.135	0.36	0.9	0.065	0.275	Fun	FBgn0038260	CG14855
PS820	PS820-RA	2	2	+	7705222	7707680	0.635	0.495	6.76	4.74	0.585	1.075	0.265	1.625	Fun	FBgn0038261	CG14856
PS820	PS820-RB	2	2	+	7705387	7707362	0.635	0.495	6.76	4.74	0.585	1.075	0.265	1.625	Fun	FBgn0038261	CG14856
PS821	PS821-RA	2	2	+	7708403	7713080	2.91	2.63	1.145	0.855	0.995	2.11	0.02	0.385	Fun	FBgn0038262	CG14857
PS822	PS822-RA	2	2	-	7714201	7733677	2.755	3.195	8.595	6.445	8.005	5.42	3.1	1.56	Dis	FBgn0266756	btsz
PS822	PS822-RB	2	2	-	7714201	7759433	2.755	3.195	8.595	6.445	8.005	5.42	3.1	1.56	Dis	FBgn0266756	btsz
PS822	PS822-RC	2	2	-	7714201	7759433	2.755	3.195	8.595	6.445	8.005	5.42	3.1	1.56	Dis	FBgn0266756	btsz
PS823	PS823-RA	2	2	+	7792881	7795902	1.29	1.665	2.465	2.19	5.825	2.885	6.85	0.96	Fun	FBgn0038268	CG3631
PS824	PS824-RA	2	2	-	7795635	7800610	2.505	4.475	4.02	10.4	11.84	28.435	14.75	40.78	Fun	FBgn0038269	Rrp6
PS825	PS825-RA	2	2	+	7798903	7801928	2.7	3.44	3.27	4.345	11.55	6.28	27.135	10.425	Fun	FBgn0067629	CG33332
PS825	PS825-RB	2	2	+	7798903	7801933	2.7	3.44	3.27	4.345	11.55	6.28	27.135	10.425	Fun	FBgn0067629	CG33332
PS825	PS825-RC	2	2	+	7799099	7801933	2.7	3.44	3.27	4.345	11.55	6.28	27.135	10.425	Fun	FBgn0067629	CG33332
PS825	PS825-RD	2	2	+	7799272	7801930	2.7	3.44	3.27	4.345	11.55	6.28	27.135	10.425	Fun	FBgn0067629	CG33332
PS825	PS825-RE	2	2	+	7799275	7801933	2.7	3.44	3.27	4.345	11.55	6.28	27.135	10.425	Fun	FBgn0067629	CG33332
PS826	PS826-RA	2	2	-	7801843	7803149	3.04	6.4	10.315	11.885	9.55	4.985	18.245	4.75	Fun	FBgn0004597	CycC
PS827	PS827-RA	2	2	+	7802875	7805218	163.165	135.89	57.505	79.945	205.805	417.27	72.41	114.945	Fun	FBgn0038271	UQCR-C1
PS827	PS827-RB	2	2	+	7803012	7805218	163.165	135.89	57.505	79.945	205.805	417.27	72.41	114.945	Fun	FBgn0038271	UQCR-C1
PS828	PS828-RA	2	2	-	7805136	7806849	10.66	16.585	22.825	23.375	18.985	9.245	18.935	6.6	Fun	FBgn0038272	Dph2
PS829	PS829-RA	2	2	+	7807066	7813020	52.99	72.575	128.805	129.28	134.155	96.275	102.545	64.215	Fun	FBgn0004227	nonA
PS829	PS829-RB	2	2	+	7807067	7812916	52.99	72.575	128.805	129.28	134.155	96.275	102.545	64.215	Fun	FBgn0004227	nonA
PS829	PS829-RC	2	2	+	7807067	7812922	52.99	72.575	128.805	129.28	134.155	96.275	102.545	64.215	Fun	FBgn0004227	nonA
PS829	PS829-RD	2	2	+	7807070	7821427	52.99	72.575	128.805	129.28	134.155	96.275	102.545	64.215	Fun	FBgn0004227	nonA
PS829	PS829-RE	2	2	+	7820395	7821427	52.99	72.575	128.805	129.28	134.155	96.275	102.545	64.215	Fun	FBgn0004227	nonA
PS829	PS829-RF	2	2	+	7820395	7821427	52.99	72.575	128.805	129.28	134.155	96.275	102.545	64.215	Fun	FBgn0004227	nonA
PS830	PS830-RA	2	2	-	7821012	7823183	6.595	8.34	7.09	13.87	25.255	9.545	41.75	11.89	Fun	FBgn0038601	CG18600
PS831	PS831-RA	2	2	-	7830403	7830950	1.125	0	0	0.27	32.415	56.725	0.17	4.735	Fun	FBgn0040582	BomBc3
PS831	PS831-RB	2	2	-	7830403	7830950	1.125	0	0	0.27	32.415	56.725	0.17	4.735	Fun	FBgn0040582	BomBc3
PS832	PS832-RA	2	2	+	7831715	7832432	23.325	10.005	37.96	20.14	106.51	184.81	1.595	6.655	Fun	FBgn0038930	BomT3
PS833	PS833-RA	2	2	-	7834466	7838868	0.1	0.225	0.205	0.215	0.16	0.775	0	0	Sil	FBgn0038929	CG13408
PS834	PS834-RA	2	2	+	7840951	7841853	8.21	10.745	12.84	14.99	59.115	15.945	218.675	63.61	Fun	FBgn0038234	mRpL11
PS835	PS835-RA	2	2	-	7841430	7843255	3.56	4.2	5.08	5.79	16.015	9.13	16.74	10.065	Fun	FBgn0038235	CG8461
PS836	PS836-RA	2	2	+	7847042	7855474	6.38	8.795	6.91	11.27	30.905	42.33	31.83	18.095	Fun	FBgn0039430	CG5455
PS836	PS836-RB	2	2	+	7850902	7855474	6.38	8.795	6.91	11.27	30.905	42.33	31.83	18.095	Fun	FBgn0039430	CG5455
PS837	PS837-RA	2	2	-	7855852	7914019	2.395	2.73	14.32	13.145	0.875	2.07	0.74	0.725	Fun	FBgn0039431	plum
PS838	PS838-RA	2	2	-	7914993	7919271	7.53	10.345	18.31	17.63	43.255	17.305	54.285	8.385	Fun	FBgn0039581	Moca-cyp
PS839	PS839-RA	2	2	+	7920701	7923291	43.025	64.855	21.76	18.915	25.275	12.8	20.285	5.605	Fun	FBgn0039580	Gfat2
PS840	PS840-RA	2	2	+	7924246	7943236	6.19	6.785	15.5	16.18	25.11	16.955	24.56	4.5	Fun	FBgn0261618	larp
PS840	PS840-RB	2	2	+	7924261	7943236	6.19	6.785	15.5	16.18	25.11	16.955	24.56	4.5	Fun	FBgn0261618	larp
PS841	PS841-RA	2	2	-	7925093	7925691	0	0.295	0.54	0.115	0	1.81	0	2.83	Fun
PS840	PS840-RC	2	2	+	7925324	7943236	6.19	6.785	15.5	16.18	25.11	16.955	24.56	4.5	Fun	FBgn0261618	larp
PS840	PS840-RD	2	2	+	7928785	7943236	6.19	6.785	15.5	16.18	25.11	16.955	24.56	4.5	Fun	FBgn0261618	larp
PS842	PS842-RA	2	2	-	7957631	7957882	0	0	0	0	0	125.02	0	4.875	Dis
PS843	PS843-RA	2	2	+	7960518	7960823	0	0.4	0	1.83	0	9.11	0	51.485	Dis
PS844	PS844-RA	2	2	+	7961256	7964001	0	4.965	0.01	26.995	0.015	103.13	0	190.63	Fun	FBgn0039577	CG12516
PS845	PS845-RA	2	2	-	7972597	7976439	0	22.735	0	102.265	0.035	894.94	0	1703.69	Fun	FBgn0004171	Mst98Cb
PS845	PS845-RB	2	2	-	7972597	7976439	0	22.735	0	102.265	0.035	894.94	0	1703.69	Fun	FBgn0004171	Mst98Cb
PS845	PS845-RC	2	2	-	7972597	7976439	0	22.735	0	102.265	0.035	894.94	0	1703.69	Fun	FBgn0004171	Mst98Cb
PS845	PS845-RD	2	2	-	7972597	7976445	0	22.735	0	102.265	0.035	894.94	0	1703.69	Fun	FBgn0004171	Mst98Cb
PS846	PS846-RA	2	2	+	7981969	7983268	0	0.27	0	0.92	0	1.305	0	4.18	Fun
PS847	PS847-RA	2	2	-	8019280	8112925	0.485	0.7	11.615	11.285	0.77	3.805	0.005	0.02	Dis	FBgn0085383	CG34354
PS847	PS847-RB	2	2	-	8019293	8112882	0.485	0.7	11.615	11.285	0.77	3.805	0.005	0.02	Dis	FBgn0085383	CG34354
PS847	PS847-RC	2	2	-	8019294	8112883	0.485	0.7	11.615	11.285	0.77	3.805	0.005	0.02	Dis	FBgn0085383	CG34354
PS847	PS847-RD	2	2	-	8019294	8112883	0.485	0.7	11.615	11.285	0.77	3.805	0.005	0.02	Dis	FBgn0085383	CG34354
PS848	PS848-RA	2	2	-	8171264	8214317	1.255	1.505	27.035	26.39	1.15	5.76	0	0.03	Fun	FBgn0085391	trv
PS848	PS848-RB	2	2	-	8172025	8214317	1.255	1.505	27.035	26.39	1.15	5.76	0	0.03	Fun	FBgn0085391	trv
PS848	PS848-RC	2	2	-	8172025	8214317	1.255	1.505	27.035	26.39	1.15	5.76	0	0.03	Fun	FBgn0085391	trv
PS848	PS848-RD	2	2	-	8172028	8231119	1.255	1.505	27.035	26.39	1.15	5.76	0	0.03	Fun	FBgn0085391	trv
PS849	PS849-RA	2	2	+	8276055	8277101	0	0	0.06	0	0	242.555	0	6.445	Fun	FBgn0039568	CG4815
PS850	PS850-RA	2	2	+	8278889	8301843	22.815	20.5	30.11	23.23	13.31	25.245	1.515	3.39	Fun	FBgn0003890	betaTub97EF
PS851	PS851-RA	2	2	-	8302922	8310329	0	5.515	0	18.215	0.03	31.025	0	85.47	Fun	FBgn0039566	CG4849
PS852	PS852-RA	2	2	-	8303895	8307493	6.66	4.36	12.49	0.34	24.135	0	25.405	0.015	Fun	FBgn0039566	CG4849
PS853	PS853-RA	2	2	+	8308827	8311262	3.63	4.63	7.03	5.86	21.1	10.475	24.475	9.095	Fun	FBgn0259990	CG42487
PS853	PS853-RB	2	2	+	8308827	8311262	3.63	4.63	7.03	5.86	21.1	10.475	24.475	9.095	Fun	FBgn0259990	CG42487
PS854	PS854-RA	2	2	-	8310345	8313199	5.455	5.405	2.25	4.665	0.97	2.845	0.015	3.41	Fun	FBgn0039564	Nep7
PS855	PS855-RA	2	2	+	8312799	8316238	0.59	1.655	1.305	2.58	10.31	2.44	11.84	3.2	Dis	FBgn0039563	CG4951
PS855	PS855-RB	2	2	+	8313132	8316182	0.59	1.655	1.305	2.58	10.31	2.44	11.84	3.2	Dis	FBgn0039563	CG4951
PS856	PS856-RA	2	2	-	8315713	8318992	130.725	158.505	150.82	144.635	124.815	122.865	112.135	65.45	Fun	FBgn0039562	Gp93
PS857	PS857-RA	2	2	+	8317142	8317657	0.4	0.585	2.63	0.955	0.2	0.12	0	0.115	Dis
PS858	PS858-RA	2	2	+	8319914	8325646	6.64	8.745	11.555	17.835	22.12	45.295	29.54	62.565	Fun	FBgn0039561	mfrn
PS859	PS859-RA	2	2	-	8326012	8330225	3.805	8.7	9.92	23.92	12.69	20.87	10.505	16.625	Fun	FBgn0039560	BOD1
PS859	PS859-RB	2	2	-	8326012	8330243	3.805	8.7	9.92	23.92	12.69	20.87	10.505	16.625	Fun	FBgn0039560	BOD1
PS859	PS859-RC	2	2	-	8326012	8330243	3.805	8.7	9.92	23.92	12.69	20.87	10.505	16.625	Fun	FBgn0039560	BOD1
PS860	PS860-RA	2	2	+	8330292	8336238	3.01	4.885	4.98	7.83	33.56	10.29	49.92	8.14	Fun	FBgn0039559	NSD
PS861	PS861-RA	2	2	-	8335682	8342691	9.355	9.81	10.46	18.225	27.635	28.455	24.405	32.455	Fun	FBgn0027579	mino
PS861	PS861-RB	2	2	-	8335816	8342581	9.355	9.81	10.46	18.225	27.635	28.455	24.405	32.455	Fun	FBgn0027579	mino
PS861	PS861-RC	2	2	-	8335816	8342632	9.355	9.81	10.46	18.225	27.635	28.455	24.405	32.455	Fun	FBgn0027579	mino
PS862	PS862-RA	2	2	+	8339872	8341102	0	0.32	0.16	0.28	12.59	0.395	18.185	0.78	Fun	FBgn0051053	nenya
PS863	PS863-RA	2	2	-	8342854	8344920	1050.81	1143.57	973.945	864.605	1068.62	263.005	920.595	143.04	Fun	FBgn0003279	RpL4
PS864	PS864-RA	2	2	+	8345378	8346484	12.49	18.9	21.205	30.46	27.625	22.825	26.375	17.31	Fun	FBgn0039558	BCAS2
PS865	PS865-RA	2	2	-	8346056	8351940	2.025	2.74	7.725	8.835	2.97	9.77	1.99	7.075	Fun	FBgn0085433	CG34404
PS865	PS865-RB	2	2	-	8346368	8351940	2.025	2.74	7.725	8.835	2.97	9.77	1.99	7.075	Fun	FBgn0085433	CG34404
PS866	PS866-RA	2	2	+	8351200	8352882	1.665	3.26	3.545	4.505	7.29	2.24	6.75	1.85	Fun	FBgn0039859	CG11539
PS867	PS867-RA	2	2	-	8352266	8356975	4.895	6.71	18.855	16.855	18.67	7.275	20.095	4.645	Fun	FBgn0011655	Med
PS867	PS867-RB	2	2	-	8352521	8356974	4.895	6.71	18.855	16.855	18.67	7.275	20.095	4.645	Fun	FBgn0011655	Med
PS868	PS868-RA	2	2	+	8358843	8374618	192.59	240.615	500.23	486.975	190.325	125.925	138.83	30.605	Fun	FBgn0039858	CycG
PS868	PS868-RB	2	2	+	8359837	8374618	192.59	240.615	500.23	486.975	190.325	125.925	138.83	30.605	Fun	FBgn0039858	CycG
PS869	PS869-RA	2	2	-	8368767	8369567	1.3	0.89	3.225	2.76	0.2	0.07	0.145	0.165	Fun
PS870	PS870-RA	2	2	-	8369645	8373388	1.96	1.825	8.16	7.965	0.275	0.175	0.045	0.2	Dis
PS871	PS871-RA	2	2	+	8375824	8377032	2089.78	2471.03	2165.02	2035.99	1699.09	492.36	2243.83	273.08	Fun	FBgn0039857	RpL6
PS872	PS872-RA	2	2	-	8375920	8378812	1.215	2.325	2.5	6.36	2.205	12.465	0.28	7.355	Dis	FBgn0039856	CG1774
PS873	PS873-RA	2	2	-	8378872	8380618	18.62	18.315	12.875	13.935	28.795	20.405	24.97	9.955	Fun	FBgn0039854	CG1635
PS874	PS874-RA	2	2	+	8380986	8382124	0	6.405	0.03	36.17	0.04	113.835	0.04	273.08	Fun	FBgn0037912	sea
PS875	PS875-RA	2	2	-	8382047	8389601	2.29	3.975	2.945	5.42	12.475	4.815	11.14	4.41	Fun	FBgn0003268	rod
PS876	PS876-RA	2	2	+	8389518	8394818	2.295	3.225	6.825	7.265	18.7	3.85	31.445	2.72	Dis	FBgn0043900	pygo
PS876	PS876-RB	2	2	+	8389659	8394810	2.295	3.225	6.825	7.265	18.7	3.85	31.445	2.72	Dis	FBgn0043900	pygo
PS877	PS877-RA	2	2	-	8395159	8398925	27.825	38.28	29.525	36.295	55.15	33.89	54.61	27.485	Fun	FBgn0028968	gammaCOP
PS878	PS878-RA	2	2	-	8398944	8400195	0	0.17	0	0.355	0	2.195	0.04	4.455	Fun	FBgn0041224	Gr97a
PS879	PS879-RA	2	2	+	8401450	8412276	1.5	2.425	4.515	6.5	9.5	4.77	9.15	3.885	Fun	FBgn0039466	CG5521
PS879	PS879-RB	2	2	+	8401594	8412271	1.5	2.425	4.515	6.5	9.5	4.77	9.15	3.885	Fun	FBgn0039466	CG5521
PS880	PS880-RA	2	2	+	8416750	8422045	8.635	16.915	3.04	1.84	2.42	7.68	0.49	1.92	Fun	FBgn0039467	CG14253
PS880	PS880-RB	2	2	+	8416750	8422853	8.635	16.915	3.04	1.84	2.42	7.68	0.49	1.92	Fun	FBgn0039467	CG14253
PS881	PS881-RA	2	2	-	8421941	8425096	660.02	663.275	288.795	273.55	158.915	55.385	221.18	66.455	Fun	FBgn0051075	CG31075
PS882	PS882-RA	2	2	-	8425653	8426635	22.86	45.42	11.78	10.1	1.57	5.04	0.365	3.665	Fun	FBgn0051076	CG31076
PS883	PS883-RA	2	2	+	8431833	8433360	0.065	0.03	0	0	0	0	0	0	Sil	FBgn0039469	TwdlC
PS884	PS884-RA	2	2	+	8439748	8441346	0	0	0.06	0	6.185	24.205	0	0	Fun	FBgn0051077	CG31077
PS885	PS885-RA	2	2	-	8441816	8444512	80.97	61.985	0.295	0.12	43.225	40.01	0	0	Fun	FBgn0039470	CG6296
PS885	PS885-RB	2	2	-	8441816	8444512	80.97	61.985	0.295	0.12	43.225	40.01	0	0	Fun	FBgn0039470	CG6296
PS885	PS885-RC	2	2	-	8441816	8444512	80.97	61.985	0.295	0.12	43.225	40.01	0	0	Fun	FBgn0039470	CG6296
PS885	PS885-RD	2	2	-	8441816	8444512	80.97	61.985	0.295	0.12	43.225	40.01	0	0	Fun	FBgn0039470	CG6296
PS885	PS885-RE	2	2	-	8441818	8444472	80.97	61.985	0.295	0.12	43.225	40.01	0	0	Fun	FBgn0039470	CG6296
PS885	PS885-RF	2	2	-	8441818	8445828	80.97	61.985	0.295	0.12	43.225	40.01	0	0	Fun	FBgn0039470	CG6296
PS886	PS886-RA	2	2	-	8448361	8449608	2.7	19.51	0	0.065	10.245	5.94	0	0.03	Fun	FBgn0039474	CG6283
PS886	PS886-RB	2	2	-	8448361	8451596	2.7	19.51	0	0.065	10.245	5.94	0	0.03	Fun	FBgn0039474	CG6283
PS887	PS887-RA	2	2	-	8452572	8453709	0.35	1.16	0.065	0	2.645	5.185	0	0	Fun	FBgn0039476	CG6271
PS888	PS888-RA	2	2	-	8456291	8457744	0.06	0.05	0.035	0.08	11.815	18.565	0	0.51	Fun	FBgn0039476	CG6271
PS888	PS888-RB	2	2	-	8456291	8461011	0.06	0.05	0.035	0.08	11.815	18.565	0	0.51	Fun	FBgn0039476	CG6271
PS889	PS889-RA	2	2	+	8461543	8475488	0.03	0.03	0.15	0.09	0.345	0.785	0.025	0	Sil-Dis	FBgn0004842	RYa-R
PS890	PS890-RA	2	2	+	8484150	8484715	0.66	0.155	18.63	8.72	0.245	0.7	0	0.3	Dis	FBgn0029170	TwdlT
PS891	PS891-RA	2	2	+	8484772	8486125	0.67	0.285	10.04	7.02	0.095	0.335	0	0	Dis	FBgn0029170	TwdlT
PS892	PS892-RA	2	2	+	8493316	8494667	0.145	0.46	0.56	2.315	1.5	5.625	0.175	3.53	Fun	FBgn0004842	RYa-R
PS892	PS892-RB	2	2	+	8493321	8494671	0.145	0.46	0.56	2.315	1.5	5.625	0.175	3.53	Fun	FBgn0004842	RYa-R
PS893	PS893-RA	2	2	+	8498502	8499478	0	3.77	0	24.735	0	181.74	0	392.23	Fun	FBgn0085321	CG34292
PS893	PS893-RB	2	2	+	8498502	8499478	0	3.77	0	24.735	0	181.74	0	392.23	Fun	FBgn0085321	CG34292
PS894	PS894-RA	2	2	-	8501279	8506483	3.735	3.685	1.62	2.18	21.895	5.225	20.475	2.935	Fun	FBgn0003495	spz
PS894	PS894-RB	2	2	-	8501279	8506483	3.735	3.685	1.62	2.18	21.895	5.225	20.475	2.935	Fun	FBgn0003495	spz
PS894	PS894-RC	2	2	-	8501279	8506483	3.735	3.685	1.62	2.18	21.895	5.225	20.475	2.935	Fun	FBgn0003495	spz
PS894	PS894-RD	2	2	-	8501279	8506483	3.735	3.685	1.62	2.18	21.895	5.225	20.475	2.935	Fun	FBgn0003495	spz
PS894	PS894-RE	2	2	-	8501279	8506483	3.735	3.685	1.62	2.18	21.895	5.225	20.475	2.935	Fun	FBgn0003495	spz
PS894	PS894-RF	2	2	-	8501283	8506398	3.735	3.685	1.62	2.18	21.895	5.225	20.475	2.935	Fun	FBgn0003495	spz
PS894	PS894-RG	2	2	-	8501283	8506398	3.735	3.685	1.62	2.18	21.895	5.225	20.475	2.935	Fun	FBgn0003495	spz
PS895	PS895-RA	2	2	+	8511343	8516952	0	0	0	0	0	0	0	0.015	Sil	FBgn0039479	CG14257
PS896	PS896-RA	2	2	-	8525653	8527244	5.18	4.345	3.83	4.205	5.56	17.805	0.13	4.165	Fun	FBgn0039481	Cpr97Eb
PS897	PS897-RA	2	2	+	8528761	8530040	331.915	214.505	0.03	0.175	0	0.2	0	0.635	Fun	FBgn0039482	CG14258
PS898	PS898-RA	2	2	+	8530150	8531618	1.275	0.44	0.075	0	8.07	23.985	0	0.035	Fun	FBgn0039483	CG14259
PS899	PS899-RA	2	2	-	8531489	8534582	7.48	8.18	4.06	3.865	0.04	0.425	0.045	0.345	Fun	FBgn0243514	eater
PS900	PS900-RA	2	2	-	8537075	8539790	3.715	2.845	0.54	0.23	0.015	0.33	0.06	0.115	NA	FBgn0243514	eater
PS901	PS901-RA	2	2	+	8541610	8543318	1.33	0.66	0.4	1.21	1.975	15.205	0	0.29	Fun	FBgn0039485	CG17189
PS902	PS902-RA	2	2	-	8542996	8546318	19.39	12.03	0.045	0.215	9.185	17.075	3.6	0.375	Fun	FBgn0039486	CAH9
PS903	PS903-RA	2	2	-	8548360	8553520	10.445	12.145	20.47	25.095	24.35	9.35	37.805	7.765	Fun	FBgn0039487	gb
PS904	PS904-RA	2	2	+	8553654	8555780	2.51	3.405	4.64	3.92	14.325	4.015	33.67	4.565	Fun	FBgn0039489	CG5880
PS905	PS905-RA	2	2	-	8558618	8561772	0	1.575	0	8.005	0	60.31	0	82.775	Fun	FBgn0039491	CG6059
PS905	PS905-RB	2	2	-	8558618	8561774	0	1.575	0	8.005	0	60.31	0	82.775	Fun	FBgn0039491	CG6059
PS906	PS906-RA	2	2	-	8562367	8586015	4.28	11.155	9.005	13.025	14.73	20.32	16.355	16.37	Fun	FBgn0039492	CG6051
PS907	PS907-RA	2	2	-	8586200	8587443	2.965	4.69	7.215	9.005	10.595	6.51	15.345	5.695	Dis	FBgn0035159	CG13896
PS907	PS907-RB	2	2	-	8586208	8588767	2.965	4.69	7.215	9.005	10.595	6.51	15.345	5.695	Dis	FBgn0035159	CG13896
PS908	PS908-RA	2	2	+	8587803	8595358	35.265	33.2	2.56	14.34	28.955	67.875	21.13	10.845	Fun	FBgn0029155	Men-b
PS908	PS908-RB	2	2	+	8587996	8595356	35.265	33.2	2.56	14.34	28.955	67.875	21.13	10.845	Fun	FBgn0029155	Men-b
PS908	PS908-RC	2	2	+	8587996	8595358	35.265	33.2	2.56	14.34	28.955	67.875	21.13	10.845	Fun	FBgn0029155	Men-b
PS908	PS908-RD	2	2	+	8588017	8595356	35.265	33.2	2.56	14.34	28.955	67.875	21.13	10.845	Fun	FBgn0029155	Men-b
PS909	PS909-RA	2	2	+	8595843	8597555	11.46	13.34	16.505	11.12	2.65	3.16	0.055	0.31	Fun	FBgn0039494	grass
PS910	PS910-RA	2	2	+	8599027	8600951	1.525	1.285	0.675	0.41	1.55	2.145	0	0.025	Fun	FBgn0039495	CG5909
PS911	PS911-RA	2	2	-	8603409	8604061	21.33	17.98	18.86	22.755	46	24.655	107.48	17.305	Fun	FBgn0085322	CG34293
PS912	PS912-RA	2	2	+	8604374	8605856	0.125	0.14	0.105	0.695	2.405	0.62	3.91	0.905	Dis	FBgn0003482	spn-D
PS913	PS913-RA	2	2	-	8610771	8612231	0	0	0	0.04	0.03	0	0	0	Sil-Dis	FBgn0004197	Ser
PS914	PS914-RA	2	2	-	8624394	8645487	2.315	3.365	16.32	12.07	0.025	0.345	0.005	0.04	Fun	FBgn0004197	Ser
PS915	PS915-RA	2	2	-	8683326	8685168	20.185	17.865	9.97	15.58	22.17	46.89	18.18	139.625	Fun	FBgn0261995	CG42813
PS916	PS916-RA	2	2	+	8685608	8687357	164.715	142.905	86.605	90.5	157.51	291.68	118.545	175.77	Fun	FBgn0039635	Pdhb
PS916	PS916-RB	2	2	+	8685608	8688549	164.715	142.905	86.605	90.5	157.51	291.68	118.545	175.77	Fun	FBgn0039635	Pdhb
PS917	PS917-RA	2	2	+	8689087	8691236	7.78	12.1	16.01	23.325	23.705	22.165	51.68	45.045	Fun	FBgn0039636	Atg14
PS918	PS918-RA	2	2	-	8690999	8696255	1.69	2.72	5.15	5.7	25.29	3.835	30.28	2.08	Fun	FBgn0005596	yem
PS919	PS919-RA	2	2	+	8696423	8702362	7.49	13.265	33.285	30.655	17.385	9.62	20.055	9.905	Fun	FBgn0039637	Ctl2
PS919	PS919-RB	2	2	+	8696494	8702362	7.49	13.265	33.285	30.655	17.385	9.62	20.055	9.905	Fun	FBgn0039637	Ctl2
PS920	PS920-RA	2	2	-	8701639	8702691	2.805	7.575	8.5	23.93	29.555	23.355	52.185	29.245	Fun	FBgn0039638	dgt6
PS920	PS920-RB	2	2	-	8701639	8704745	2.805	7.575	8.5	23.93	29.555	23.355	52.185	29.245	Fun	FBgn0039638	dgt6
PS920	PS920-RC	2	2	-	8701640	8702691	2.805	7.575	8.5	23.93	29.555	23.355	52.185	29.245	Fun	FBgn0039638	dgt6
PS920	PS920-RD	2	2	-	8701679	8704805	2.805	7.575	8.5	23.93	29.555	23.355	52.185	29.245	Fun	FBgn0039638	dgt6
PS921	PS921-RA	2	2	+	8704907	8711938	19.185	24.12	27.925	22.51	37.79	30.58	27.31	14.185	Fun	FBgn0028671	Vha100-1
PS921	PS921-RB	2	2	+	8704907	8711938	19.185	24.12	27.925	22.51	37.79	30.58	27.31	14.185	Fun	FBgn0028671	Vha100-1
PS921	PS921-RC	2	2	+	8704913	8711880	19.185	24.12	27.925	22.51	37.79	30.58	27.31	14.185	Fun	FBgn0028671	Vha100-1
PS921	PS921-RD	2	2	+	8704913	8711938	19.185	24.12	27.925	22.51	37.79	30.58	27.31	14.185	Fun	FBgn0028671	Vha100-1
PS921	PS921-RE	2	2	+	8704913	8711938	19.185	24.12	27.925	22.51	37.79	30.58	27.31	14.185	Fun	FBgn0028671	Vha100-1
PS921	PS921-RF	2	2	+	8704915	8711882	19.185	24.12	27.925	22.51	37.79	30.58	27.31	14.185	Fun	FBgn0028671	Vha100-1
PS922	PS922-RA	2	2	-	8711557	8712496	0.925	1.405	3.665	2.715	5.12	1.18	8.255	0.9	Fun	FBgn0039639	Alg13
PS923	PS923-RA	2	2	+	8712609	8719801	1.635	1.84	1.205	1.895	73.025	1.3	64.615	0.43	Fun	FBgn0039640	superdeath
PS923	PS923-RB	2	2	+	8712831	8719801	1.635	1.84	1.205	1.895	73.025	1.3	64.615	0.43	Fun	FBgn0039640	superdeath
PS924	PS924-RA	2	2	-	8719598	8720952	3.69	3.9	8.72	9.44	4.305	2.56	3.61	0.26	Fun	FBgn0039641	CG14511
PS925	PS925-RA	2	2	+	8721265	8722122	1.13	3.165	4.6	4.98	1.41	2.285	1.6	0.86	Dis
PS926	PS926-RA	2	2	-	8721592	8723567	5.815	14.375	33.43	38.99	14.3	14.22	13.29	18.43	Fun	FBgn0039642	CG11882
PS927	PS927-RA	2	2	+	8722874	8724089	802.44	634.81	110.61	87.47	474.66	837.2	189.335	17.38	Fun	FBgn0014869	Pglym78
PS928	PS928-RA	2	2	-	8723582	8727430	7.775	10.37	10.9	13.725	36.795	15.74	74.275	44.335	Fun	FBgn0041588	eIF2D
PS928	PS928-RB	2	2	-	8724031	8727429	7.775	10.37	10.9	13.725	36.795	15.74	74.275	44.335	Fun	FBgn0041588	eIF2D
PS928	PS928-RC	2	2	-	8724031	8727429	7.775	10.37	10.9	13.725	36.795	15.74	74.275	44.335	Fun	FBgn0041588	eIF2D
PS929	PS929-RA	2	2	-	8730940	8745781	4.17	5.915	34.82	30.07	0.61	1.77	0.03	1.415	Fun	FBgn0004644	hh
PS930	PS930-RA	2	2	-	8753954	8754597	0	0	0	0	0	0	0	0	Sil
PS931	PS931-RA	2	2	-	8754865	8763366	4.16	6.865	11.405	12.2	10.22	5.595	21.17	4.27	Dis	FBgn0004395	unk
PS931	PS931-RB	2	2	-	8758951	8763330	4.16	6.865	11.405	12.2	10.22	5.595	21.17	4.27	Dis	FBgn0004395	unk
PS931	PS931-RC	2	2	-	8758961	8761969	4.16	6.865	11.405	12.2	10.22	5.595	21.17	4.27	Dis	FBgn0004395	unk
PS932	PS932-RA	2	2	+	8764603	8768388	2.88	3.155	5.33	4.555	5.965	0.905	4.965	0.38	Fun	FBgn0039508	CG3368
PS933	PS933-RA	2	2	-	8768158	8769335	16.035	21.45	19.705	26.13	28.575	19.155	20.405	10.13	Fun	FBgn0039509	bigmax
PS934	PS934-RA	2	2	+	8769648	8772196	72.805	81.14	146.825	124.385	69.935	30.78	39.585	10.965	Fun	FBgn0015737	Hmu
PS935	PS935-RA	2	2	-	8772094	8772838	360.725	297.24	46.76	62.96	58.58	31.085	53.48	2.355	Fun	FBgn0040609	CG3348
PS936	PS936-RA	2	2	+	8789215	8860115	0.435	0.325	1.57	0.75	2.23	0.545	0.77	0.255	Fun	FBgn0260487	CG42534
PS937	PS937-RA	2	2	-	8803029	8824663	0	1.525	0	9.55	0.005	31.78	0	51.675	Fun	FBgn0267433	kl-5
PS938	PS938-RA	2	2	-	8862031	8926452	0.365	0.31	4.37	3.17	0.475	1.93	0.025	0.075	Fun	FBgn0016061	side
PS939	PS939-RA	2	2	+	8955139	8958329	0	3.015	0.01	58.755	0.035	42.215	0.025	57.425	Fun	FBgn0039010	CG4907
PS940	PS940-RA	2	2	+	8962893	8964927	0	0.73	0.015	6.18	0	7.725	0	8.545	Fun	FBgn0033963	CG12857
PS941	PS941-RA	2	2	-	8990940	8991435	128.95	221.67	0	0	2.63	0.135	0	0	Fun	FBgn0262613	CG43139
PS941	PS941-RB	2	2	-	8990940	8991456	128.95	221.67	0	0	2.63	0.135	0	0	Fun	FBgn0262613	CG43139
PS942	PS942-RA	2	2	-	8991528	8992375	6.64	4.815	0.045	0.08	0	0	0	0.065	Fun
PS943	PS943-RA	2	2	-	9005514	9006889	0	0	0.25	0.385	0	0.1	0	0	Sil	FBgn0039522	CG13972
PS944	PS944-RA	2	2	+	9009520	9023890	0.02	0.06	0.395	0.26	0.055	0.06	0	0	Sil	FBgn0039523	CG12885
PS945	PS945-RA	2	2	-	9023897	9035466	8.09	18.805	28.235	22.685	20.265	10.855	21.265	4.69	Fun	FBgn0004387	Klp98A
PS945	PS945-RB	2	2	-	9023897	9035478	8.09	18.805	28.235	22.685	20.265	10.855	21.265	4.69	Fun	FBgn0004387	Klp98A
PS946	PS946-RA	2	2	-	9036051	9065554	28.265	33.45	112.95	96.5	41.86	39.96	32.115	13.01	Fun	FBgn0027492	wdb
PS946	PS946-RB	2	2	-	9037464	9065554	28.265	33.45	112.95	96.5	41.86	39.96	32.115	13.01	Fun	FBgn0027492	wdb
PS946	PS946-RC	2	2	-	9038223	9061358	28.265	33.45	112.95	96.5	41.86	39.96	32.115	13.01	Fun	FBgn0027492	wdb
PS947	PS947-RA	2	2	+	9042039	9042661	0.195	1.095	3.065	4.51	0.235	0.365	0.15	0	Dis
PS948	PS948-RA	2	2	+	9061072	9064532	7.47	8.735	6.045	6.21	37.74	8.115	36.26	5.125	Dis	FBgn0010926	l(3)07882
PS948	PS948-RB	2	2	+	9061593	9064511	7.47	8.735	6.045	6.21	37.74	8.115	36.26	5.125	Dis	FBgn0010926	l(3)07882
PS946	PS946-RD	2	2	-	9064146	9065972	28.265	33.45	112.95	96.5	41.86	39.96	32.115	13.01	Fun	FBgn0027492	wdb
PS949	PS949-RA	2	2	+	9065317	9067369	2.06	5.19	5.63	9.81	26.71	5.22	43.63	8.135	Fun	FBgn0035955	CG5194
PS950	PS950-RA	2	2	+	9068474	9070617	8.02	16.31	17.08	49.15	30.69	68.395	32.71	106.74	Fun	FBgn0038515	CG5823
[truncated: 23,708 more rows]

## Sheet: c. D. obscura
Table S7c. Chromosomal location, expression level, and functionality of transcripts in Drosophila obscura
[truncated: 27,693 more rows]

[truncated: 6 more sheets: d. D. albomicans, e. D. nasuta, f. D. kohkoa, g. D. americana, h. D. texana, i. D. novamexicana]
