# Supplementary material for: Shared evolutionary trajectories of three independent neo-sex chromosomes in Drosophila
Source: HighWire-hosted journal article supplement (doi:10.1101/gr.275503.121), 2021-10-21
Supplement: SupplementalTableS21.xlsx [file SupplementalTableS21.xlsx]

## Sheet: a. D. miranda
Table S21a. Mapping summary of RNA sequencing in Drosophila miranda
Sample name	No. of sequenced fragments	No. of qualified fragments	No. of uniquely mapped fragments	% unique	No. of multiply mapped fragments	% multi	No. of total mapped fragments	% mapped
mirLF1	26017355	17737756	15478645	0.8726	1149245	0.0648	16627890	0.9374
mirLF2	28918024	19776843	17091174	0.8642	1214941	0.0614	18306115	0.9256
mirLM1	25590609	17233474	14612681	0.8479	2336571	0.1356	16949252	0.9835
mirLM2	25158302	17265849	14388446	0.8333	2489154	0.1442	16877600	0.9775
mirPF1	24194242	17471939	14919893	0.8539	552360	0.0316	15472253	0.8855
mirPF2	24271252	17014784	15004387	0.8818	533720	0.0314	15538107	0.9132
mirPM1	27069649	18945353	15768745	0.8323	2383848	0.1258	18152593	0.9581
mirPM2	28447437	20149467	16822035	0.8349	2578827	0.128	19400862	0.9629
mirWF1	28575225	19503553	15913599	0.8159	487415	0.025	16401014	0.8409
mirWF2	30788103	21637024	16906778	0.7814	569713	0.0263	17476491	0.8077
mirWM1	30183796	20753353	16496701	0.7949	3581548	0.1726	20078249	0.9675
mirWM2	26069442	18293292	14205447	0.7765	3497636	0.1912	17703083	0.9677
mirOF1	26405152	20359527	12235783	0.601	578136	0.0284	12813919	0.6294
mirOF2	26234207	19671668	14288664	0.7264	668347	0.034	14957011	0.7604
mirTeM1	21471221	15731450	11807174	0.7505	3181472	0.2022	14988646	0.9527
mirTeM2	25396512	18447811	14153026	0.7672	3496342	0.1895	17649368	0.9567

## Sheet: b. D. pseudoobscura
Table S21b. Mapping summary of RNA sequencing in Drosophila pseudoobscura
Sample name	No. of sequenced fragments	No. of qualified fragments	No. of uniquely mapped fragments	% unique	No. of multiply mapped fragments	% multi	No. of total mapped fragments	% mapped
pseLF1	23699626	15302202	13156876	0.8598	769715	0.0503	13926591	0.9101
pseLF2	23636731	15557627	12423687	0.7986	1580732	0.1016	14004419	0.9002
pseLM1	27189413	17855742	14054016	0.7871	1360699	0.0762	15414715	0.8633
pseLM2	20976896	13870635	10987452	0.7921	1221743	0.0881	12209195	0.8802
psePF1	20506898	12519664	9839887	0.786	446122	0.0356	10286009	0.8216
psePF2	47761070	29193921	22097356	0.7569	1379300	0.0472	23476656	0.8041
psePM1	19444202	11623411	9083130	0.7815	616408	0.053	9699538	0.8345
psePM2	27884695	17387271	12235378	0.7037	1141639	0.0657	13377017	0.7694
pseWF1	25660366	17368917	14852442	0.8551	526985	0.0303	15379427	0.8854
pseWF2	27761070	19100615	16164930	0.8463	590057	0.0309	16754987	0.8772
pseWM1	30144127	20808934	15935612	0.7658	1210856	0.0582	17146468	0.824
pseWM2	25006521	17851442	13994480	0.7839	855910	0.0479	14850390	0.8318
pseOF1	26106548	19416414	14394388	0.7414	935012	0.0482	15329400	0.7896
pseOF2	29728159	22212295	16698391	0.7518	1013597	0.0456	17711988	0.7974
pseTeM1	28061108	20279524	17030321	0.8398	1013598	0.05	18043919	0.8898
pseTeM2	26790630	19546731	15864701	0.8116	1057967	0.0541	16922668	0.8657

## Sheet: c. D. obscura
Table S21c. Mapping summary of RNA sequencing in Drosophila obscura
Sample name	No. of sequenced fragments	No. of qualified fragments	No. of uniquely mapped fragments	% unique	No. of multiply mapped fragments	% multi	No. of total mapped fragments	% mapped
obsLF1	24786059	17784155	13617845	0.7657	1286219	0.0723	14904064	0.838
obsLF2	28130180	18718055	15446559	0.8252	1845973	0.0986	17292532	0.9238
obsLM1	27068506	18860663	14800215	0.7847	1835226	0.0973	16635441	0.882
obsLM2	25176259	16967728	14062839	0.8288	1538015	0.0906	15600854	0.9194
obsPF1	20677458	14837252	12015040	0.8098	673046	0.0454	12688086	0.8552
obsPF2	28506170	19312317	16004080	0.8287	882143	0.0457	16886223	0.8744
obsPM1	30742844	21627569	18082131	0.8361	1034156	0.0478	19116287	0.8839
obsPM2	25292494	17578811	14596272	0.8303	808390	0.046	15404662	0.8763
obsWF1	27369387	19092605	15168064	0.7944	1044264	0.0547	16212328	0.8491
obsWF2	29481530	21220716	15914588	0.75	1024049	0.0483	16938637	0.7983
obsWM1	30688771	21236623	16967763	0.799	1222499	0.0576	18190262	0.8566
obsWM2	27006540	19161052	15380948	0.8027	1124935	0.0587	16505883	0.8614
obsOF1	24626338	18427358	13604829	0.7383	802183	0.0435	14407012	0.7818
obsOF2	23178468	17101289	13225573	0.7734	780343	0.0456	14005916	0.819
obsTeM1	27562422	20130156	16020343	0.7958	1425549	0.0708	17445892	0.8666
obsTeM2	22517871	16745199	12896187	0.7701	1100362	0.0657	13996549	0.8358

## Sheet: d. D. albomicans
Table S21d. Mapping summary of RNA sequencing in Drosophila albomicans
Sample name	No. of sequenced fragments	No. of qualified fragments	No. of uniquely mapped fragments	% unique	No. of multiply mapped fragments	% multi	No. of total mapped fragments	% mapped
albLF1	22754403	18055184	16259153	0.9005	608626	0.0337	16867779	0.9342
albLF2	29736306	23667223	20090423	0.8489	712690	0.0301	20803113	0.879
albLM1	31851476	25661741	17659637	0.6882	6236576	0.243	23896213	0.9312
albLM2	31933590	25813844	17705618	0.6859	6304581	0.2442	24010199	0.9301
albPF1	22703674	17818220	15006715	0.8422	305169	0.0171	15311884	0.8593
albPF2	28989285	22575812	18468483	0.8181	344247	0.0152	18812730	0.8333
albPM1	33340815	25960650	18719163	0.7211	5497459	0.2118	24216622	0.9329
albPM2	26964217	21692899	15550313	0.7168	4754741	0.2192	20305054	0.936
albWF1	30715402	25125243	21912905	0.8721	333838	0.0133	22246743	0.8854
albWF2	30049176	24188537	19245031	0.7956	272949	0.0113	19517980	0.8069
albWM1	26205671	21423118	13336851	0.6225	4004561	0.1869	17341412	0.8094
albWM2	25546100	20742368	13208481	0.6368	3940719	0.19	17149200	0.8268
albOF1	23173840	16389103	10843998	0.6617	125688	0.0077	10969686	0.6694
albOF2	19682910	14352374	11171767	0.7784	127321	0.0089	11299088	0.7873
albTeM1	26197686	18138403	12336223	0.6801	3372649	0.1859	15708872	0.866
albTeM2	23569005	17642578	11084829	0.6283	2904784	0.1646	13989613	0.7929

## Sheet: e. D. nasuta
Table S21e. Mapping summary of RNA sequencing in Drosophila nasuta
Sample name	No. of sequenced fragments	No. of qualified fragments	No. of uniquely mapped fragments	% unique	No. of multiply mapped fragments	% multi	No. of total mapped fragments	% mapped
nasLF1	26530116	21462085	19047587	0.8875	803861	0.0375	19851448	0.925
nasLF2	31652884	25597369	22692243	0.8865	693612	0.0271	23385855	0.9136
nasLM1	29886041	24230726	21451943	0.8853	913973	0.0377	22365916	0.923
nasLM2	24873936	20237823	18308993	0.9047	536650	0.0265	18845643	0.9312
nasPF1	30065682	23789767	21413550	0.9001	386095	0.0162	21799645	0.9163
nasPF2	34300510	27569115	25350848	0.9195	387936	0.0141	25738784	0.9336
nasPM1	30200304	23878209	22043139	0.9231	506269	0.0212	22549408	0.9443
nasPM2	30662192	22530898	20445869	0.9075	427854	0.019	20873723	0.9265
nasWF1	23841783	19431241	16126401	0.8299	287752	0.0148	16414153	0.8447
nasWF2	41845904	34369304	28100890	0.8176	512475	0.0149	28613365	0.8325
nasWM1	31555671	25026812	19680495	0.7864	500261	0.02	20180756	0.8064
nasWM2	34008035	27406295	21373692	0.7799	528025	0.0193	21901717	0.7992
nasOF1	24304479	17264369	9488128	0.5496	97678	0.0057	9585806	0.5553
nasOF2	26359917	19817029	14770670	0.7454	157811	0.008	14928481	0.7534
nasTeM1	22339393	15450608	12515712	0.81	304175	0.0197	12819887	0.8297
nasTeM2	23438400	17323071	14727512	0.8502	383845	0.0222	15111357	0.8724

## Sheet: f. D. kohkoa
Table S21f. Mapping summary of RNA sequencing in Drosophila kohkoa
Sample name	No. of sequenced fragments	No. of qualified fragments	No. of uniquely mapped fragments	% unique	No. of multiply mapped fragments	% multi	No. of total mapped fragments	% mapped
kohLF1	28459092	22853914	18510848	0.81	2230725	0.0976	20741573	0.9076
kohLF2	32733486	25395427	20336307	0.8008	2350147	0.0925	22686454	0.8933
kohLM1	30414786	23370890	18745938	0.8021	2167613	0.0927	20913551	0.8948
kohLM2	33553940	25617125	20847488	0.8138	2377434	0.0928	23224922	0.9066
kohPF1	29463224	22575845	17506346	0.7754	2497239	0.1106	20003585	0.886
kohPF2	26574371	20401938	16034004	0.7859	2056658	0.1008	18090662	0.8867
kohPM1	40600553	31150191	25084440	0.8053	2817987	0.0905	27902427	0.8958
kohPM2	35899410	27328390	21711027	0.7944	2475179	0.0906	24186206	0.885
kohWF1	32798355	26249005	21235700	0.809	2910328	0.1109	24146028	0.9199
kohWF2	36657161	28442178	23225513	0.8166	3043131	0.107	26268644	0.9236
kohWM1	33038521	26567036	19273691	0.7255	4236613	0.1595	23510304	0.885
kohWM2	29561715	23761189	17518544	0.7373	3269617	0.1376	20788161	0.8749
kohOF1	34182549	26731036	21732247	0.813	2253602	0.0843	23985849	0.8973
kohOF2	35425939	27848429	22606236	0.8118	2342550	0.0841	24948786	0.8959
kohTeM1	33856895	26523807	21191568	0.799	1107359	0.0417	22298927	0.8407
kohTeM2	33981406	26474186	21252669	0.8028	1146402	0.0433	22399071	0.8461

## Sheet: g. D. americana
Table S21g. Mapping summary of RNA sequencing in Drosophila americana
Sample name	No. of sequenced fragments	No. of qualified fragments	No. of uniquely mapped fragments	% unique	No. of multiply mapped fragments	% multi	No. of total mapped fragments	% mapped
ameLF1	28319171	22944313	19451031	0.8477	1958991	0.0854	21410022	0.9331
ameLF2	30431996	25016656	20907220	0.8357	2514063	0.1005	23421283	0.9362
ameLM1	28110195	22961865	17973876	0.7828	3510873	0.1529	21484749	0.9357
ameLM2	30755164	25181552	19793614	0.786	3819200	0.1517	23612814	0.9377
amePF1	27587008	22534340	19949943	0.8853	1415442	0.0628	21365385	0.9481
amePF2	38684231	31653111	28399816	0.8972	1702446	0.0538	30102262	0.951
amePM1	32031102	25928324	21909047	0.845	2723319	0.105	24632366	0.95
amePM2	31151826	25480627	21423326	0.8408	2708097	0.1063	24131423	0.9471
ameWF1	30156015	24444179	20447877	0.8365	2794839	0.1143	23242716	0.9508
ameWF2	34601002	28077223	24187620	0.8615	2708784	0.0965	26896404	0.958
ameWM1	31160245	25244965	19823044	0.7852	4084051	0.1618	23907095	0.947
ameWM2	29175398	23759852	19193058	0.8078	3385075	0.1425	22578133	0.9503
ameOF1	27204529	18929674	12687816	0.6703	5602268	0.296	18290084	0.9663
ameOF2	24771338	18323356	14094194	0.7692	3478579	0.1898	17572773	0.959
ameTeM1	17792531	12304992	9613763	0.7813	1944406	0.158	11558169	0.9393
ameTeM2	21207765	15324543	11350049	0.7406	2968964	0.1937	14319013	0.9343

## Sheet: h. D. texana
Table S21h. Mapping summary of RNA sequencing in Drosophila texana
Sample name	No. of sequenced fragments	No. of qualified fragments	No. of uniquely mapped fragments	% unique	No. of multiply mapped fragments	% multi	No. of total mapped fragments	% mapped
texLF1	29601678	24370077	22548254	0.9252	655653	0.0269	23203907	0.9521
texLF2	34676506	28545146	25732092	0.9015	996030	0.0349	26728122	0.9364
texLM1	32229460	26519678	24313688	0.9168	804122	0.0303	25117810	0.9471
texLM2	27316718	22304077	20553133	0.9215	603261	0.027	21156394	0.9485
texPF1	28736159	22962745	21587872	0.9401	538975	0.0235	22126847	0.9636
texPF2	31927301	25310967	24119761	0.9529	287456	0.0114	24407217	0.9643
texPM1	27441960	22016149	21000474	0.9539	258959	0.0118	21259433	0.9657
texPM2	34149776	27593353	26077813	0.9451	443447	0.0161	26521260	0.9612
texWF1	27792862	22479639	21182571	0.9423	303535	0.0135	21486106	0.9558
texWF2	35454282	28853644	27201065	0.9427	401314	0.0139	27602379	0.9566
texWM1	30805480	24514537	22967396	0.9369	408143	0.0166	23375539	0.9535
texWM2	28195461	23138579	21497507	0.9291	369593	0.016	21867100	0.9451
texOF1	26449906	19425630	18676676	0.9614	142888	0.0074	18819564	0.9688
texOF2	19497877	13654680	13005885	0.9525	120769	0.0088	13126654	0.9613
texTeM1	21282780	14763634	13941692	0.9443	288129	0.0195	14229821	0.9638
texTeM2	18612406	13351484	12577717	0.942	275719	0.0207	12853436	0.9627

## Sheet: i. D. novamexicana
Table S21i. Mapping summary of RNA sequencing in Drosophila novamexicana
Sample name	No. of sequenced fragments	No. of qualified fragments	No. of uniquely mapped fragments	% unique	No. of multiply mapped fragments	% multi	No. of total mapped fragments	% mapped
novLF1	40129249	31097273	25095291	0.807	3175428	0.1021	28270719	0.9091
novLF2	34687135	26419455	21441397	0.8116	2829303	0.1071	24270700	0.9187
novLM1	39617234	31003397	25860904	0.8341	2513011	0.0811	28373915	0.9152
novLM2	31934836	24752431	19489036	0.7874	2958848	0.1195	22447884	0.9069
novPF1	23201941	17680644	12916791	0.7306	938381	0.0531	13855172	0.7837
novPF2	33235165	25735316	18857160	0.7327	1483987	0.0577	20341147	0.7904
novPM1	36539479	27879665	21673005	0.7774	1414091	0.0507	23087096	0.8281
novPM2	35398059	26346618	20703498	0.7858	1375013	0.0522	22078511	0.838
novWF1	29864179	22763813	17715149	0.7782	2198429	0.0966	19913578	0.8748
novWF2	36463172	28470378	22429997	0.7878	2889410	0.1015	25319407	0.8893
novWM1	38984128	30840236	25051163	0.8123	2422158	0.0785	27473321	0.8908
novWM2	34168884	27198818	22390815	0.8232	2253877	0.0829	24644692	0.9061
novOF1	26389174	20469006	16908117	0.826	1371768	0.067	18279885	0.893
novOF2	35473238	26726305	22669114	0.8482	1544982	0.0578	24214096	0.906
novTeM1	33967811	26696308	23471567	0.8792	992666	0.0372	24464233	0.9164
novTeM2	33874891	27710211	24351348	0.8788	1007874	0.0364	25359222	0.9152
